# Supplementary material for: Pioneering, chromatin remodeling, and epigenetic constraint in early T-cell gene regulation by SPI1 (PU.1)
Source: PubMed Central journal article supplement — Genome Res. 2018 Oct;28(10):1508–19. doi: 10.1101/gr.231423.117 (PMC6169891; doi:10.1101/gr.231423.117), 2018-10
Supplement: supp_gr.231423.117_Supplemental_Table_S7.pdf [file supp_gr.231423.117_Supplemental_Table_S7.pdf]

**Table S7: Motifs enriched at functionally distinct classes of sites bound by exogenously introduced PU.1: effects of chromatin states and chromatin developmental dynamics**

A. Motif analysis of Group 5,6 and 7 peaks defined in Fig. 4C. The top five motifs defined by Homer De Novo motif search are shown for each site category. **B.** Motif analysis of exogenous PU1WTHA-occupied non-promoter (distal) peaks in CD25<sup>+</sup> cells, as detected by  $\alpha$ HA ChIP. Sites with quality scores above or below PWM score median are compared for co-enriched motifs, depending on whether they lie in normally inaccessible (PWM median score=9.74) or accessible (PWM median score=8.97) regions in DN3 cells. Note strongly similar pattern of motif preference for endogenous PU.1 at its natural sites (Fig. 1G, Supplementary Fig. S1D). The top five motifs defined by Homer De Novo motif search are shown for each site category. **C.** Top five motifs enriched at PU1WTHA  $\alpha$ HA peaks in regions that change dynamically from DN1 to DN3.

Table 7: TOP MOTIFS AT SITES OCCUPIED BY EXOGENOUS PU.1 IN PRO-T CELLS

**A**

Fig 4C group 5

| Motif                                                                             | Best match       | % of Targets | % of Bg | P-value  |
|-----------------------------------------------------------------------------------|------------------|--------------|---------|----------|
|  | <i>SpiB(ETS)</i> | 80.9         | 7.9     | 1e-20016 |
|  | <i>Cebpa</i>     | 2.4          | 0.01    | 1e-1476  |
|  | <i>Klf5</i>      | 2.6          | 0.06    | 1e-955   |
|  | <i>Runx2</i>     | 26.0         | 11.9    | 1e-942   |
|  | <i>Zic</i>       | 2.9          | 0.12    | 1e-844   |

Fig 4C group 6

| Motif                                                                             | Best match                     | % of Targets | % of Bg | P-value |
|-----------------------------------------------------------------------------------|--------------------------------|--------------|---------|---------|
|  | <i>SpiB(ETS)</i>               | 63.2         | 3.1     | 1e-8735 |
|  | <i>Nr2f2</i>                   | 9.6          | 0.3     | 1e-1381 |
|  | <i>Dlx2</i>                    | 8.7          | 0.2     | 1e-1365 |
|  | <i>SD0003.1 at AC acceptor</i> | 9.2          | 0.3     | 1e-1348 |
|  | <i>Mecom</i>                   | 10.3         | 0.4     | 1e-1342 |

Fig 4C group 7

| Motif                                                                             | Best match       | % of Targets | % of Bg | P-value |
|-----------------------------------------------------------------------------------|------------------|--------------|---------|---------|
|  | <i>PU.1(ETS)</i> | 65.1         | 16.3    | 1e-6469 |
|  | <i>Runx1</i>     | 12.5         | 4.8     | 1e-498  |
|  | <i>Sp1</i>       | 15.2         | 9.0     | 1e-217  |
|  | <i>SPI1</i>      | 1.3          | 0.1     | 1e-213  |
|  | <i>BORIS</i>     | 1.1          | 0.3     | 1e-89   |

**B**

PU1WTHA closed above PWM median score

| Motif                                                                               | Best match       | % of Targets | % of Bg | P-value  |
|-------------------------------------------------------------------------------------|------------------|--------------|---------|----------|
|  | <i>SpiB(ETS)</i> | 86.5         | 1.7     | 1e-24217 |
|  | <i>Sort2</i>     | 9.6          | 0.2     | 1e-2204  |
|  | <i>Sox4</i>      | 8.2          | 0.2     | 1e-1772  |
|  | <i>Six6</i>      | 7.3          | 0.2     | 1e-1592  |
|  | <i>Oct</i>       | 6.3          | 0.1     | 1e-1548  |

PU1WTHA closed below PWM median score

| Motif                                                                               | Best match       | % of Targets | % of Bg | P-value |
|-------------------------------------------------------------------------------------|------------------|--------------|---------|---------|
|  | <i>Spi1</i>      | 84.0         | 15.3    | 1e-9022 |
|  | <i>Runx2</i>     | 36.5         | 20.8    | 1e-506  |
|  | <i>IRC900814</i> | 13.3         | 5.5     | 1e-335  |
|  | <i>Cphx</i>      | 1.0          | 0.11    | 1e-111  |
|  | <i>Foxo1</i>     | 0.4          | 0.01    | 1e-91   |

PU1WTHA open above PWM median score

| Motif                                                                               | Best match       | % of Targets | % of Bg | P-value |
|-------------------------------------------------------------------------------------|------------------|--------------|---------|---------|
|  | <i>PU.1(ETS)</i> | 42.6         | 3.0     | 1e-2123 |
|  | <i>Runx1</i>     | 17.7         | 6.8     | 1e-169  |
|  | <i>Ptfa</i>      | 23.8         | 15.1    | 1e-67   |
|  | <i>Runx2</i>     | 22.8         | 15.1    | 1e-53   |
|  | <i>Ctcf</i>      | 1.8          | 0.3     | 1e-48   |

PU1WTHA open below PWM median score

| Motif                                                                               | Best match   | % of Targets | % of Bg | P-value |
|-------------------------------------------------------------------------------------|--------------|--------------|---------|---------|
|  | <i>Spi1</i>  | 52.7         | 22.7    | 1e-538  |
|  | <i>Runx1</i> | 31.1         | 12.2    | 1e-315  |
|  | <i>Ctcf</i>  | 2.5          | 0.4     | 1e-69   |
|  | <i>E2A</i>   | 23.1         | 15.9    | 1e-45   |
|  | <i>Prdm1</i> | 0.4          | 0.01    | 1e-39   |

**C**

PU1WTHA in closing regions

| Motif                                                                               | Best match       | % of Targets | % of Bg | P-value |
|-------------------------------------------------------------------------------------|------------------|--------------|---------|---------|
|  | <i>SpiB(ETS)</i> | 64.6         | 2.8     | 1e-4969 |
|  | <i>Runx1</i>     | 26.5         | 8.9     | 1e-394  |
|  | <i>PU.1-IRF</i>  | 12.8         | 2.9     | 1e-291  |
|  | <i>Cebpa</i>     | 0.7          | 0.01    | 1e-67   |
|  | <i>PU.1(ETS)</i> | 2.4          | 0.5     | 1e-59   |

PU1WTHA in opening regions

| Motif                                                                               | Best match        | % of Targets | % of Bg | P-value |
|-------------------------------------------------------------------------------------|-------------------|--------------|---------|---------|
|  | <i>PU.1(ETS)</i>  | 64.3         | 5.9     | 1e-2208 |
|  | <i>Runx2</i>      | 20.7         | 9.2     | 1e-112  |
|  | <i>Tcf3</i>       | 30.1         | 17.0    | 1e-98   |
|  | <i>Tcf3(HMG)*</i> | 13.0         | 5.3     | 1e-81   |
|  | <i>GATA</i>       | 0.6          | 0.01    | 1e-32   |

\*Tcf3(HMG) = Tcf711
