# Supplementary material for: Pioneering, chromatin remodeling, and epigenetic constraint in early T-cell gene regulation by SPI1 (PU.1)
Source: HighWire-hosted journal article supplement (doi:10.1101/gr.231423.117), 2018-08-31
Supplement: Supplemental_Table_S1.xlsx [file Supplemental_Table_S1.xlsx]

## Sheet: DN1-2b PWM
Table S1: DN1-DN2b and Macrophage derived PU.1 position-weight matries (PWM) and sequence score
DN derived consensus PWM
>AAAGAGGAAGTG
HOMER determined log-odds score treshold: 8.356375
A	C	G	T
0.537	0.107	0.146	0.21
0.488	0.126	0.234	0.152
0.561	0.001	0.167	0.271
0.179	0.131	0.689	0.001
0.709	0.01	0.28	0.001
0.036	0.001	0.962	0.001
0.001	0.001	0.997	0.001
0.997	0.001	0.001	0.001
0.997	0.001	0.001	0.001
0.05	0.121	0.828	0.001
0.063	0.151	0.001	0.785
0.114	0.213	0.532	0.141
DN1-DN2b derived PU.1 PWM sequences in the mm9 genomic build
Sequence	Log_odds_score	Strand
AAAGAGGAAGTG	12.8922	+
CACTTCCTCTTT	12.8922	-
AATGAGGAAGTG	12.1646	+
CACTTCCTCATT	12.1646	-
AGAGAGGAAGTG	12.1572	+
CACTTCCTCTCT	12.1572	-
AAAGAGGAAGTC	11.9769	+
GACTTCCTCTTT	11.9769	-
AAAGGGGAAGTG	11.9631	+
CACTTCCCCTTT	11.9631	-
CACTTCCTCTTA	11.9533	-
TAAGAGGAAGTG	11.9533	+
ATAGAGGAAGTG	11.7258	+
CACTTCCTCTAT	11.7258	-
AAGGAGGAAGTG	11.6805	+
CACTTCCTCCTT	11.6805	-
CACTTCCTCTTC	11.5898	-
GAAGAGGAAGTG	11.5898	+
AAAGAGGAAGTT	11.5643	+
AACTTCCTCTTT	11.5643	-
AAAAAGGAAGTG	11.5444	+
CACTTCCTTTTT	11.5444	-
ACAGAGGAAGTG	11.5382	+
CACTTCCTCTGT	11.5382	-
AGTGAGGAAGTG	11.4296	+
CACTTCCTCACT	11.4296	-
AAAGAGGAAGTA	11.3518	+
TACTTCCTCTTT	11.3518	-
CAAGAGGAAGTG	11.279	+
CACTTCCTCTTG	11.279	-
AATGAGGAAGTC	11.2493	+
GACTTCCTCATT	11.2493	-
AAAGAGGAAGCG	11.2438	+
CGCTTCCTCTTT	11.2438	-
AGAGAGGAAGTC	11.2419	+
GACTTCCTCTCT	11.2419	-
AATGGGGAAGTG	11.2355	+
CACTTCCCCATT	11.2355	-
AAACAGGAAGTG	11.2322	+
CACTTCCTGTTT	11.2322	-
AGAGGGGAAGTG	11.2281	+
CACTTCCCCTCT	11.2281	-
CACTTCCTCATA	11.2257	-
TATGAGGAAGTG	11.2257	+
CACTTCCTCTCA	11.2183	-
TGAGAGGAAGTG	11.2183	+
AAAGGGGAAGTC	11.0478	+
GACTTCCCCTTT	11.0478	-
GACTTCCTCTTA	11.038	-
TAAGAGGAAGTC	11.038	+
CACTTCCCCTTA	11.0243	-
TAAGGGGAAGTG	11.0243	+
ATTGAGGAAGTG	10.9982	+
CACTTCCTCAAT	10.9982	-
AAAGAGGAACTG	10.969	+
CAGTTCCTCTTT	10.969	-
AGGGAGGAAGTG	10.9455	+
CACTTCCTCCCT	10.9455	-
CACTTCCTCATC	10.8622	-
GATGAGGAAGTG	10.8622	+
CACTTCCTCTCC	10.8548	-
GGAGAGGAAGTG	10.8548	+
AACTTCCTCATT	10.8367	-
AATGAGGAAGTT	10.8367	+
AACTTCCTCTCT	10.8293	-
AGAGAGGAAGTT	10.8293	+
AATAAGGAAGTG	10.8168	+
CACTTCCTTATT	10.8168	-
ACTGAGGAAGTG	10.8106	+
CACTTCCTCAGT	10.8106	-
ATAGAGGAAGTC	10.8104	+
GACTTCCTCTAT	10.8104	-
AGAAAGGAAGTG	10.8094	+
CACTTCCTTTCT	10.8094	-
ATAGGGGAAGTG	10.7967	+
CACTTCCCCTAT	10.7967	-
CACTTCCTCTAA	10.7869	-
TTAGAGGAAGTG	10.7869	+
AAGGAGGAAGTC	10.7651	+
GACTTCCTCCTT	10.7651	-
AAGGGGGAAGTG	10.7514	+
CACTTCCCCCTT	10.7514	-
CACTTCCTCCTA	10.7416	-
TAGGAGGAAGTG	10.7416	+
GAAGAGGAAGTC	10.6745	+
GACTTCCTCTTC	10.6745	-
CACTTCCCCTTC	10.6608	-
GAAGGGGAAGTG	10.6608	+
AAAGGGGAAGTT	10.6353	+
AACTTCCCCTTT	10.6353	-
AAAAAGGAAGTC	10.629	+
GACTTCCTTTTT	10.629	-
AACTTCCTCTTA	10.6254	-
TAAGAGGAAGTT	10.6254	+
AATGAGGAAGTA	10.6242	+
TACTTCCTCATT	10.6242	-
ACAGAGGAAGTC	10.6228	+
GACTTCCTCTGT	10.6228	-
AGAGAGGAAGTA	10.6168	+
TACTTCCTCTCT	10.6168	-
AAAAGGGAAGTG	10.6153	+
CACTTCCCTTTT	10.6153	-
ACAGGGGAAGTG	10.6091	+
CACTTCCCCTGT	10.6091	-
CACTTCCTTTTA	10.6055	-
TAAAAGGAAGTG	10.6055	+
CACTTCCTCTGA	10.5993	-
TCAGAGGAAGTG	10.5993	+
CACTTCCTCATG	10.5514	-
CATGAGGAAGTG	10.5514	+
CACTTCCTCTCG	10.544	-
CGAGAGGAAGTG	10.544	+
AATGAGGAAGCG	10.5162	+
CGCTTCCTCATT	10.5162	-
AGTGAGGAAGTC	10.5143	+
GACTTCCTCACT	10.5143	-
ATGGAGGAAGTG	10.514	+
CACTTCCTCCAT	10.514	-
AGAGAGGAAGCG	10.5088	+
CGCTTCCTCTCT	10.5088	-
AATCAGGAAGTG	10.5046	+
CACTTCCTGATT	10.5046	-
AGTGGGGAAGTG	10.5005	+
CACTTCCCCACT	10.5005	-
AGACAGGAAGTG	10.4972	+
CACTTCCTGTCT	10.4972	-
CACTTCCTCACA	10.4907	-
TGTGAGGAAGTG	10.4907	+
CACTTCCTCTAC	10.4234	-
GTAGAGGAAGTG	10.4234	+
AAAGGGGAAGTA	10.4227	+
TACTTCCCCTTT	10.4227	-
TAAGAGGAAGTA	10.4129	+
TACTTCCTCTTA	10.4129	-
AACTTCCTCTAT	10.3979	-
ATAGAGGAAGTT	10.3979	+
CACTTCCTCCTC	10.3781	-
GAGGAGGAAGTG	10.3781	+
ATAAAGGAAGTG	10.3779	+
CACTTCCTTTAT	10.3779	-
AAAGAGGAAGAG	10.3697	+
CTCTTCCTCTTT	10.3697	-
CAAGAGGAAGTC	10.3637	+
GACTTCCTCTTG	10.3637	-
AACTTCCTCCTT	10.3526	-
AAGGAGGAAGTT	10.3526	+
CAAGGGGAAGTG	10.35	+
CACTTCCCCTTG	10.35	-
AAGAAGGAAGTG	10.3326	+
CACTTCCTTCTT	10.3326	-
AAAGAGGAAGCC	10.3285	+
GGCTTCCTCTTT	10.3285	-
ACGGAGGAAGTG	10.3264	+
CACTTCCTCCGT	10.3264	-
AATGGGGAAGTC	10.3202	+
GACTTCCCCATT	10.3202	-
AAACAGGAAGTC	10.3168	+
GACTTCCTGTTT	10.3168	-
AAAGGGGAAGCG	10.3147	+
CGCTTCCCCTTT	10.3147	-
AGAGGGGAAGTC	10.3128	+
GACTTCCCCTCT	10.3128	-
GACTTCCTCATA	10.3104	-
TATGAGGAAGTC	10.3104	+
CGCTTCCTCTTA	10.3049	-
TAAGAGGAAGCG	10.3049	+
AAACGGGAAGTG	10.3031	+
CACTTCCCGTTT	10.3031	-
GACTTCCTCTCA	10.303	-
TGAGAGGAAGTC	10.303	+
CACTTCCCCATA	10.2966	-
TATGGGGAAGTG	10.2966	+
CACTTCCTGTTA	10.2933	-
TAACAGGAAGTG	10.2933	+
CACTTCCCCTCA	10.2893	-
TGAGGGGAAGTG	10.2893	+
AACTTCCTCTTC	10.2619	-
GAAGAGGAAGTT	10.2619	+
CACTTCCTTTTC	10.242	-
GAAAAGGAAGTG	10.242	+
AATGAGGAACTG	10.2414	+
CAGTTCCTCATT	10.2414	-
CACTTCCTCTGC	10.2358	-
GCAGAGGAAGTG	10.2358	+
AGAGAGGAACTG	10.234	+
CAGTTCCTCTCT	10.234	-
AAAAAGGAAGTT	10.2165	+
AACTTCCTTTTT	10.2165	-
AACTTCCTCTGT	10.2103	-
ACAGAGGAAGTT	10.2103	+
ACAAAGGAAGTG	10.1903	+
CACTTCCTTTGT	10.1903	-
ATAGAGGAAGTA	10.1853	+
TACTTCCTCTAT	10.1853	-
AAGGAGGAAGTA	10.14	+
TACTTCCTCCTT	10.14	-
CACTTCCTCACC	10.1272	-
GGTGAGGAAGTG	10.1272	+
CACTTCCTCTAG	10.1126	-
CTAGAGGAAGTG	10.1126	+
GACTTCCCCTTA	10.1089	-
TAAGGGGAAGTC	10.1089	+
AACTTCCTCACT	10.1017	-
AGTGAGGAAGTT	10.1017	+
AAAGAGGAAATG	10.0852	+
CATTTCCTCTTT	10.0852	-
ATTGAGGAAGTC	10.0828	+
GACTTCCTCAAT	10.0828	-
AGTAAGGAAGTG	10.0818	+
CACTTCCTTACT	10.0818	-
ATAGAGGAAGCG	10.0774	+
CGCTTCCTCTAT	10.0774	-
ATTGGGGAAGTG	10.0691	+
CACTTCCCCAAT	10.0691	-
CACTTCCTCCTG	10.0673	-
CAGGAGGAAGTG	10.0673	+
ATACAGGAAGTG	10.0657	+
CACTTCCTGTAT	10.0657	-
CACTTCCTCAAA	10.0593	-
TTTGAGGAAGTG	10.0593	+
AAAGAGGAACTC	10.0536	+
GAGTTCCTCTTT	10.0536	-
GAAGAGGAAGTA	10.0494	+
TACTTCCTCTTC	10.0494	-
AAAGGGGAACTG	10.0399	+
CAGTTCCCCTTT	10.0399	-
AAGGAGGAAGCG	10.0321	+
CGCTTCCTCCTT	10.0321	-
AGGGAGGAAGTC	10.0301	+
GACTTCCTCCCT	10.0301	-
CAGTTCCTCTTA	10.0301	-
TAAGAGGAACTG	10.0301	+
AAGCAGGAAGTG	10.0204	+
CACTTCCTGCTT	10.0204	-
AGGGGGGAAGTG	10.0164	+
CACTTCCCCCCT	10.0164	-
CACTTCCTCCCA	10.0066	-
TGGGAGGAAGTG	10.0066	+
AAAAAGGAAGTA	10.0039	+
TACTTCCTTTTT	10.0039	-
ACAGAGGAAGTA	9.99773	+
TACTTCCTCTGT	9.99773	-
AACTTCCTCTTG	9.95115	-
CAAGAGGAAGTT	9.95115	+
GACTTCCTCATC	9.94686	-
GATGAGGAAGTC	9.94686	+
CGCTTCCTCTTC	9.94141	-
GAAGAGGAAGCG	9.94141	+
GACTTCCTCTCC	9.93947	-
GGAGAGGAAGTC	9.93947	+
CACTTCCCCATC	9.93315	-
GATGGGGAAGTG	9.93315	+
CAAAAGGAAGTG	9.93118	+
CACTTCCTTTTG	9.93118	-
CACTTCCTGTTC	9.92977	-
GAACAGGAAGTG	9.92977	+
CACTTCCCCTCC	9.92576	-
GGAGGGGAAGTG	9.92576	+
CACTTCCTCTGG	9.92501	-
CCAGAGGAAGTG	9.92501	+
AAAGAGGAAGCT	9.91592	+
AGCTTCCTCTTT	9.91592	-
AACTTCCCCATT	9.90766	-
AATGGGGAAGTT	9.90766	+
AAACAGGAAGTT	9.90428	+
AACTTCCTGTTT	9.90428	-
AATAAGGAAGTC	9.9014	+
GACTTCCTTATT	9.9014	-
AACTTCCCCTCT	9.90026	-
AGAGGGGAAGTT	9.90026	+
AACTTCCTCATA	9.89783	-
TATGAGGAAGTT	9.89783	+
AAAAAGGAAGCG	9.89595	+
CGCTTCCTTTTT	9.89595	-
ACTGAGGAAGTC	9.89522	+
GACTTCCTCAGT	9.89522	-
AGAAAGGAAGTC	9.89401	+
GACTTCCTTTCT	9.89401	-
AACTTCCTCTCA	9.89044	-
TGAGAGGAAGTT	9.89044	+
ACAGAGGAAGCG	9.88977	+
CGCTTCCTCTGT	9.88977	-
AGTGAGGAAGTA	9.88917	+
TACTTCCTCACT	9.88917	-
AATAGGGAAGTG	9.88768	+
CACTTCCCTATT	9.88768	-
ACTGGGGAAGTG	9.88151	+
CACTTCCCCAGT	9.88151	-
ATAGGGGAAGTC	9.88135	+
GACTTCCCCTAT	9.88135	-
AGAAGGGAAGTG	9.88029	+
CACTTCCCTTCT	9.88029	-
ACACAGGAAGTG	9.87813	+
CACTTCCTGTGT	9.87813	-
CACTTCCTTATA	9.87786	-
TATAAGGAAGTG	9.87786	+
CACTTCCTCAGA	9.87168	-
TCTGAGGAAGTG	9.87168	+
GACTTCCTCTAA	9.87153	-
TTAGAGGAAGTC	9.87153	+
CACTTCCTTTCA	9.87047	-
TGAAAGGAAGTG	9.87047	+
CACTTCCCCTAA	9.85782	-
TTAGGGGAAGTG	9.85782	+
AAGGGGGAAGTC	9.83606	+
GACTTCCCCCTT	9.83606	-
GACTTCCTCCTA	9.82624	-
TAGGAGGAAGTC	9.82624	+
CACTTCCTCACG	9.81644	-
CGTGAGGAAGTG	9.81644	+
CACTTCCCCCTA	9.81252	-
TAGGGGGAAGTG	9.81252	+
ATAGAGGAACTG	9.80255	+
CAGTTCCTCTAT	9.80255	-
AGTGAGGAAGCG	9.78121	+
CGCTTCCTCACT	9.78121	-
AGTCAGGAAGTG	9.76957	+
CACTTCCTGACT	9.76957	-
AAGGAGGAACTG	9.75726	+
CAGTTCCTCCTT	9.75726	-
GAAGGGGAAGTC	9.7454	+
GACTTCCCCTTC	9.7454	-
CAAGAGGAAGTA	9.73859	+
TACTTCCTCTTG	9.73859	-
AAAGAGGAAGCA	9.70336	+
TGCTTCCTCTTT	9.70336	-
AAAAGGGAAGTC	9.69993	+
GACTTCCCTTTT	9.69993	-
AACTTCCCCTTA	9.69637	-
TAAGGGGAAGTT	9.69637	+
CACTTCCTCAAC	9.69578	-
GTTGAGGAAGTG	9.69578	+
AATGGGGAAGTA	9.69509	+
TACTTCCCCATT	9.69509	-
ACAGGGGAAGTC	9.69376	+
GACTTCCCCTGT	9.69376	-
AAACAGGAAGTA	9.69172	+
TACTTCCTGTTT	9.69172	-
GACTTCCTTTTA	9.69011	-
TAAAAGGAAGTC	9.69011	+
AGAGGGGAAGTA	9.6877	+
TACTTCCCCTCT	9.6877	-
TACTTCCTCATA	9.68527	-
TATGAGGAAGTA	9.68527	+
GACTTCCTCTGA	9.68393	-
TCAGAGGAAGTC	9.68393	+
TACTTCCTCTCA	9.67788	-
TGAGAGGAAGTA	9.67788	+
CACTTCCCTTTA	9.67639	-
TAAAGGGAAGTG	9.67639	+
AACTTCCTCAAT	9.67029	-
ATTGAGGAAGTT	9.67029	+
CACTTCCCCTGA	9.67022	-
TCAGGGGAAGTG	9.67022	+
CAGTTCCTCTTC	9.66659	-
GAAGAGGAACTG	9.66659	+
ATTAAGGAAGTG	9.65032	+
CACTTCCTTAAT	9.65032	-
CACTTCCTCCCC	9.64309	-
GGGGAGGAAGTG	9.64309	+
AATGAGGAAGAG	9.64206	+
CTCTTCCTCATT	9.64206	-
AAAGAGGAACTT	9.6411	+
AAGTTCCTCTTT	9.6411	-
CATGAGGAAGTC	9.63608	+
GACTTCCTCATG	9.63608	-
AGAGAGGAAGAG	9.63466	+
CTCTTCCTCTCT	9.63466	-
CAAGAGGAAGCG	9.63063	+
CGCTTCCTCTTG	9.63063	-
CGAGAGGAAGTC	9.62869	+
GACTTCCTCTCG	9.62869	-
CACTTCCCCATG	9.62237	-
CATGGGGAAGTG	9.62237	+
AAAAAGGAACTG	9.62113	+
CAGTTCCTTTTT	9.62113	-
CAACAGGAAGTG	9.61899	+
CACTTCCTGTTG	9.61899	-
AACTTCCTCCCT	9.6176	-
AGGGAGGAAGTT	9.6176	+
CACTTCCCCTCG	9.61498	-
CGAGGGGAAGTG	9.61498	+
ACAGAGGAACTG	9.61495	+
CAGTTCCTCTGT	9.61495	-
AAAGAAGAAGTG	9.60671	+
CACTTCTTCTTT	9.60671	-
AATGAGGAAGCC	9.60085	+
GGCTTCCTCATT	9.60085	-
ATGGAGGAAGTC	9.59869	+
GACTTCCTCCAT	9.59869	-
AGGAAGGAAGTG	9.59763	+
CACTTCCTTCCT	9.59763	-
AGAGAGGAAGCC	9.59346	+
GGCTTCCTCTCT	9.59346	-
AATCAGGAAGTC	9.58921	+
GACTTCCTGATT	9.58921	-
AATGGGGAAGCG	9.58713	+
CGCTTCCCCATT	9.58713	-
AGTGGGGAAGTC	9.58519	+
GACTTCCCCACT	9.58519	-
ATGGGGGAAGTG	9.58498	+
CACTTCCCCCAT	9.58498	-
AAACAGGAAGCG	9.58376	+
CGCTTCCTGTTT	9.58376	-
AGACAGGAAGTC	9.58182	+
GACTTCCTGTCT	9.58182	-
AGAGGGGAAGCG	9.57974	+
CGCTTCCCCTCT	9.57974	-
CGCTTCCTCATA	9.57731	-
TATGAGGAAGCG	9.57731	+
AATCGGGAAGTG	9.5755	+
CACTTCCCGATT	9.5755	-
GACTTCCTCACA	9.57537	-
TGTGAGGAAGTC	9.57537	+
CACTTCCTCCAA	9.57516	-
TTGGAGGAAGTG	9.57516	+
CGCTTCCTCTCA	9.56992	-
TGAGAGGAAGCG	9.56992	+
AGACGGGAAGTG	9.5681	+
CACTTCCCGTCT	9.5681	-
CACTTCCTGATA	9.56567	-
TATCAGGAAGTG	9.56567	+
CACTTCCCCACA	9.56165	-
TGTGGGGAAGTG	9.56165	+
CACTTCCTGTCA	9.55828	-
TGACAGGAAGTG	9.55828	+
AACTTCCTCATC	9.53433	-
GATGAGGAAGTT	9.53433	+
AACTTCCTCTCC	9.52694	-
GGAGAGGAAGTT	9.52694	+
CACTTCCTTATC	9.51436	-
GATAAGGAAGTG	9.51436	+
CACTTCCTCAGC	9.50818	-
GCTGAGGAAGTG	9.50818	+
GACTTCCTCTAC	9.50803	-
GTAGAGGAAGTC	9.50803	+
CACTTCCTTTCC	9.50697	-
GGAAAGGAAGTG	9.50697	+
AGTGAGGAACTG	9.50639	+
CAGTTCCTCACT	9.50639	-
CACTTCCCCTAC	9.49432	-
GTAGGGGAAGTG	9.49432	+
AACTTCCTTATT	9.48887	-
AATAAGGAAGTT	9.48887	+
TAAGGGGAAGTA	9.48381	+
TACTTCCCCTTA	9.48381	-
AACTTCCTCAGT	9.48269	-
ACTGAGGAAGTT	9.48269	+
AACTTCCTTTCT	9.48147	-
AGAAAGGAAGTT	9.48147	+
AACTTCCCCTAT	9.46882	-
ATAGGGGAAGTT	9.46882	+
GACTTCCTCCTC	9.46274	-
GAGGAGGAAGTC	9.46274	+
ACTAAGGAAGTG	9.46272	+
CACTTCCTTAGT	9.46272	-
ATAAAGGAAGTC	9.46257	+
GACTTCCTTTAT	9.46257	-
AACTTCCTCTAA	9.459	-
TTAGAGGAAGTT	9.459	+
ATTGAGGAAGTA	9.45772	+
TACTTCCTCAAT	9.45772	-
AAAGAGGAAGAC	9.45431	+
GTCTTCCTCTTT	9.45431	-
CACTTCCCCCTC	9.44902	-
GAGGGGGAAGTG	9.44902	+
ATAAGGGAAGTG	9.44885	+
CACTTCCCTTAT	9.44885	-
AAAGGGGAAGAG	9.44059	+
CTCTTCCCCTTT	9.44059	-
CACTTCCTTTAA	9.43903	-
TTAAAGGAAGTG	9.43903	+
CAAGGGGAAGTC	9.43462	+
GACTTCCCCTTG	9.43462	-
CTCTTCCTCTTA	9.43077	-
TAAGAGGAAGAG	9.43077	+
AAAGAGGAACTA	9.42854	+
TAGTTCCTCTTT	9.42854	-
AACTTCCCCCTT	9.42353	-
AAGGGGGAAGTT	9.42353	+
AAGAAGGAAGTC	9.41727	+
GACTTCCTTCTT	9.41727	-
AACTTCCTCCTA	9.41371	-
TAGGAGGAAGTT	9.41371	+
ACGGAGGAAGTC	9.41109	+
GACTTCCTCCGT	9.41109	-
AGGGAGGAAGTA	9.40504	+
TACTTCCTCCCT	9.40504	-
AAGAGGGAAGTG	9.40356	+
CACTTCCCTCTT	9.40356	-
AAAGGGGAAGCC	9.39939	+
GGCTTCCCCTTT	9.39939	-
ACGGGGGAAGTG	9.39738	+
CACTTCCCCCGT	9.39738	-
CACTTCCTTCTA	9.39373	-
TAGAAGGAAGTG	9.39373	+
GGCTTCCTCTTA	9.38956	-
TAAGAGGAAGCC	9.38956	+
AAACGGGAAGTC	9.38775	+
GACTTCCCGTTT	9.38775	-
CACTTCCTCCGA	9.38756	-
TCGGAGGAAGTG	9.38756	+
CACTTCCTCAAG	9.385	-
CTTGAGGAAGTG	9.385	+
GACTTCCCCATA	9.3813	-
TATGGGGAAGTC	9.3813	+
GACTTCCTGTTA	9.37792	-
TAACAGGAAGTC	9.37792	+
CGCTTCCCCTTA	9.37585	-
TAAGGGGAAGCG	9.37585	+
GACTTCCCCTCA	9.37391	-
TGAGGGGAAGTC	9.37391	+
CACTTCCCGTTA	9.36421	-
TAACGGGAAGTG	9.36421	+
AATGAGGAAATG	9.35761	+
CATTTCCTCATT	9.35761	-
CAAGAGGAACTG	9.35581	+
CAGTTCCTCTTG	9.35581	-
AGAGAGGAAATG	9.35022	+
CATTTCCTCTCT	9.35022	-
ATTGAGGAAGCG	9.34977	+
CGCTTCCTCAAT	9.34977	-
ATTCAGGAAGTG	9.33813	+
CACTTCCTGAAT	9.33813	-
AACTTCCCCTTC	9.33287	-
GAAGGGGAAGTT	9.33287	+
CACTTCCTCCCG	9.33232	-
CGGGAGGAAGTG	9.33232	+
GAAAAGGAAGTC	9.32661	+
GACTTCCTTTTC	9.32661	-
AATGAGGAACTC	9.32603	+
GAGTTCCTCATT	9.32603	-
GATGAGGAAGTA	9.32177	+
TACTTCCTCATC	9.32177	-
AAAGAGGAACCG	9.32058	+
CGGTTCCTCTTT	9.32058	-
GACTTCCTCTGC	9.32043	-
GCAGAGGAAGTC	9.32043	+
AGAGAGGAACTC	9.31864	+
GAGTTCCTCTCT	9.31864	-
GGAGAGGAAGTA	9.31438	+
TACTTCCTCTCC	9.31438	-
CACTTCCCTTTC	9.31289	-
GAAAGGGAAGTG	9.31289	+
AATGGGGAACTG	9.31232	+
CAGTTCCCCATT	9.31232	-
AAACAGGAACTG	9.30894	+
CAGTTCCTGTTT	9.30894	-
CACTTCCCCTGC	9.30672	-
GCAGGGGAAGTG	9.30672	+
AGAGGGGAACTG	9.30492	+
CAGTTCCCCTCT	9.30492	-
CAGTTCCTCATA	9.30249	-
TATGAGGAACTG	9.30249	+
AGGGAGGAAGCG	9.29708	+
CGCTTCCTCCCT	9.29708	-
CAGTTCCTCTCA	9.2951	-
TGAGAGGAACTG	9.2951	+
AAAAGGGAAGTT	9.2874	+
AACTTCCCTTTT	9.2874	-
AGGCAGGAAGTG	9.28544	+
CACTTCCTGCCT	9.28544	-
AACTTCCCCTGT	9.28122	-
ACAGGGGAAGTT	9.28122	+
AACTTCCTTTTA	9.27758	-
TAAAAGGAAGTT	9.27758	+
AATAAGGAAGTA	9.27631	+
TACTTCCTTATT	9.27631	-
ACAAAGGAAGTC	9.27497	+
GACTTCCTTTGT	9.27497	-
AACTTCCTCTGA	9.2714	-
TCAGAGGAAGTT	9.2714	+
ACTGAGGAAGTA	9.27013	+
TACTTCCTCAGT	9.27013	-
AGAAAGGAAGTA	9.26891	+
TACTTCCTTTCT	9.26891	-
ACAAGGGAAGTG	9.26125	+
CACTTCCCTTGT	9.26125	-
ATAGGGGAAGTA	9.25626	+
TACTTCCCCTAT	9.25626	-
CACTTCCTTTGA	9.25143	-
TCAAAGGAAGTG	9.25143	+
TACTTCCTCTAA	9.24644	-
TTAGAGGAAGTA	9.24644	+
AACTTCCTCATG	9.22355	-
CATGAGGAAGTT	9.22355	+
AACTTCCTCTCG	9.21616	-
CGAGAGGAAGTT	9.21616	+
CGCTTCCTCATC	9.21381	-
GATGAGGAAGCG	9.21381	+
GACTTCCTCACC	9.21187	-
GGTGAGGAAGTC	9.21187	+
CACTTCCTCCAC	9.21165	-
GTGGAGGAAGTG	9.21165	+
AAGGGGGAAGTA	9.21097	+
TACTTCCCCCTT	9.21097	-
CGCTTCCTCTCC	9.20642	-
GGAGAGGAAGCG	9.20642	+
CACTTCCTTATG	9.20358	-
CATAAGGAAGTG	9.20358	+
ATAGAGGAAGAG	9.20322	+
CTCTTCCTCTAT	9.20322	-
CACTTCCTGATC	9.20217	-
GATCAGGAAGTG	9.20217	+
TACTTCCTCCTA	9.20115	-
TAGGAGGAAGTA	9.20115	+
CACTTCCCCACC	9.19815	-
GGTGGGGAAGTG	9.19815	+
CACTTCCTCAGG	9.1974	-
CCTGAGGAAGTG	9.1974	+
CTAGAGGAAGTC	9.19725	+
GACTTCCTCTAG	9.19725	-
CACTTCCTTTCG	9.19619	-
CGAAAGGAAGTG	9.19619	+
CACTTCCTGTCC	9.19478	-
GGACAGGAAGTG	9.19478	+
AATGAGGAAGCT	9.18832	+
AGCTTCCTCATT	9.18832	-
AACTTCCTCCAT	9.18616	-
ATGGAGGAAGTT	9.18616	+
CACTTCCCCTAG	9.18354	-
CTAGGGGAAGTG	9.18354	+
AGAGAGGAAGCT	9.18093	+
AGCTTCCTCTCT	9.18093	-
AACTTCCTGATT	9.17668	-
AATCAGGAAGTT	9.17668	+
AACTTCCCCACT	9.17266	-
AGTGGGGAAGTT	9.17266	+
AAAGAGGAAATC	9.16987	+
GATTTCCTCTTT	9.16987	-
AACTTCCTGTCT	9.16929	-
AGACAGGAAGTT	9.16929	+
AATAAGGAAGCG	9.16835	+
CGCTTCCTTATT	9.16835	-
AGTAAGGAAGTC	9.1664	+
GACTTCCTTACT	9.1664	-
ATGAAGGAAGTG	9.16619	+
CACTTCCTTCAT	9.16619	-
AACTTCCTCACA	9.16284	-
TGTGAGGAAGTT	9.16284	+
ACTGAGGAAGCG	9.16217	+
CGCTTCCTCAGT	9.16217	-
ATAGAGGAAGCC	9.16202	+
GGCTTCCTCTAT	9.16202	-
AGAAAGGAAGCG	9.16095	+
CGCTTCCTTTCT	9.16095	-
AAGGAGGAAGAG	9.15793	+
CTCTTCCTCCTT	9.15793	-
AAAGGGGAAATG	9.15615	+
CATTTCCCCTTT	9.15615	-
ATTGGGGAAGTC	9.15375	+
GACTTCCCCAAT	9.15375	-
AGTAGGGAAGTG	9.15269	+
CACTTCCCTACT	9.15269	-
CAGGAGGAAGTC	9.15196	+
GACTTCCTCCTG	9.15196	-
ACTCAGGAAGTG	9.15053	+
CACTTCCTGAGT	9.15053	-
ATACAGGAAGTC	9.15038	+
GACTTCCTGTAT	9.15038	-
ATAGGGGAAGCG	9.1483	+
CGCTTCCCCTAT	9.1483	-
CATTTCCTCTTA	9.14633	-
TAAGAGGAAATG	9.14633	+
GACTTCCTCAAA	9.14393	-
TTTGAGGAAGTC	9.14393	+
CACTTCCTTACA	9.14287	-
TGTAAGGAAGTG	9.14287	+
CGCTTCCTCTAA	9.13848	-
TTAGAGGAAGCG	9.13848	+
CACTTCCCCCTG	9.13824	-
CAGGGGGAAGTG	9.13824	+
ATACGGGAAGTG	9.13666	+
CACTTCCCGTAT	9.13666	-
CACTTCCCCAAA	9.13021	-
TTTGGGGAAGTG	9.13021	+
CACTTCCTGTAA	9.12684	-
TTACAGGAAGTG	9.12684	+
AAAGGGGAACTC	9.12457	+
GAGTTCCCCTTT	9.12457	-
GAAGGGGAAGTA	9.12031	+
TACTTCCCCTTC	9.12031	-
AAGGAGGAAGCC	9.11673	+
GGCTTCCTCCTT	9.11673	-
GAGTTCCTCTTA	9.11474	-
TAAGAGGAACTC	9.11474	+
AAGCAGGAAGTC	9.10509	+
GACTTCCTGCTT	9.10509	-
AAGGGGGAAGCG	9.10301	+
CGCTTCCCCCTT	9.10301	-
AGGGGGGAAGTC	9.10107	+
GACTTCCCCCCT	9.10107	-
CAGTTCCCCTTA	9.10103	-
TAAGGGGAACTG	9.10103	+
AACTTCCTCTAC	9.0955	-
GTAGAGGAAGTT	9.0955	+
CGCTTCCTCCTA	9.09319	-
TAGGAGGAAGCG	9.09319	+
AAGCGGGAAGTG	9.09137	+
CACTTCCCGCTT	9.09137	-
GACTTCCTCCCA	9.09124	-
TGGGAGGAAGTC	9.09124	+
CACTTCCTGCTA	9.08155	-
TAGCAGGAAGTG	9.08155	+
CACTTCCCCCCA	9.07753	-
TGGGGGGAAGTG	9.07753	+
CACTTCCTTTAC	9.07553	-
GTAAAGGAAGTG	9.07553	+
ATTGAGGAACTG	9.07495	+
CAGTTCCTCAAT	9.07495	-
AAAAGGGAAGTA	9.07484	+
TACTTCCCTTTT	9.07484	-
ACAGGGGAAGTA	9.06866	+
TACTTCCCCTGT	9.06866	-
CTCTTCCTCTTC	9.06727	-
GAAGAGGAAGAG	9.06727	+
TAAAAGGAAGTA	9.06502	+
TACTTCCTTTTA	9.06502	-
TACTTCCTCTGA	9.05884	-
TCAGAGGAAGTA	9.05884	+
AACTTCCTCCTC	9.05021	-
GAGGAGGAAGTT	9.05021	+
AACTTCCTTTAT	9.05003	-
ATAAAGGAAGTT	9.05003	+
AAAGAGGAAGAT	9.04177	+
ATCTTCCTCTTT	9.04177	-
CACTTCCTTCTC	9.03023	-
GAGAAGGAAGTG	9.03023	+
GAAGAGGAAGCC	9.02606	+
GGCTTCCTCTTC	9.02606	-
CACTTCCTCCGC	9.02406	-
GCGGAGGAAGTG	9.02406	+
AGGGAGGAACTG	9.02226	+
CAGTTCCTCCCT	9.02226	-
AACTTCCCCTTG	9.02209	-
CAAGGGGAAGTT	9.02209	+
AAAAAGGAAGAG	9.0218	+
CTCTTCCTTTTT	9.0218	-
GACTTCCCCATC	9.0178	-
GATGGGGAAGTC	9.0178	+
CAAAAGGAAGTC	9.01583	+
GACTTCCTTTTG	9.01583	-
ACAGAGGAAGAG	9.01562	+
CTCTTCCTCTGT	9.01562	-
GAACAGGAAGTC	9.01442	+
GACTTCCTGTTC	9.01442	-
CGCTTCCCCTTC	9.01235	-
GAAGGGGAAGCG	9.01235	+
CATGAGGAAGTA	9.01099	+
TACTTCCTCATG	9.01099	-
GACTTCCCCTCC	9.0104	-
GGAGGGGAAGTC	9.0104	+
CCAGAGGAAGTC	9.00965	+
GACTTCCTCTGG	9.00965	-
AACTTCCTTCTT	9.00474	-
AAGAAGGAAGTT	9.00474	+
CGAGAGGAAGTA	9.0036	+
TACTTCCTCTCG	9.0036	-
CAAAGGGAAGTG	9.00212	+
CACTTCCCTTTG	9.00212	-
CACTTCCCGTTC	9.00071	-
GAACGGGAAGTG	9.00071	+
AACTTCCTCCGT	8.99856	-
ACGGAGGAAGTT	8.99856	+
CACTTCCCCTGG	8.99594	-
CCAGGGGAAGTG	8.99594	+
AAAGGGGAAGCT	8.98685	+
AGCTTCCCCTTT	8.98685	-
AAAAAGGAAGCC	8.9806	+
GGCTTCCTTTTT	8.9806	-
ACGAAGGAAGTG	8.97859	+
CACTTCCTTCGT	8.97859	-
AGCTTCCTCTTA	8.97703	-
TAAGAGGAAGCT	8.97703	+
AATGAGGAAGCA	8.97576	+
TGCTTCCTCATT	8.97576	-
AAACGGGAAGTT	8.97521	+
AACTTCCCGTTT	8.97521	-
ACAGAGGAAGCC	8.97442	+
GGCTTCCTCTGT	8.97442	-
ATGGAGGAAGTA	8.9736	+
TACTTCCTCCAT	8.9736	-
AATAGGGAAGTC	8.97233	+
GACTTCCCTATT	8.97233	-
AACTTCCCCATA	8.96876	-
TATGGGGAAGTT	8.96876	+
AGAGAGGAAGCA	8.96836	+
TGCTTCCTCTCT	8.96836	-
AAAAGGGAAGCG	8.96688	+
CGCTTCCCTTTT	8.96688	-
ACTGGGGAAGTC	8.96615	+
GACTTCCCCAGT	8.96615	-
AACTTCCTGTTA	8.96539	-
TAACAGGAAGTT	8.96539	+
AGAAGGGAAGTC	8.96494	+
GACTTCCCTTCT	8.96494	-
AATCAGGAAGTA	8.96412	+
TACTTCCTGATT	8.96412	-
ACACAGGAAGTC	8.96278	+
GACTTCCTGTGT	8.96278	-
GACTTCCTTATA	8.96251	-
TATAAGGAAGTC	8.96251	+
AACTTCCCCTCA	8.96137	-
TGAGGGGAAGTT	8.96137	+
ACAGGGGAAGCG	8.9607	+
CGCTTCCCCTGT	8.9607	-
AGTGGGGAAGTA	8.9601	+
TACTTCCCCACT	8.9601	-
CGCTTCCTTTTA	8.95706	-
TAAAAGGAAGCG	8.95706	+
AGACAGGAAGTA	8.95672	+
TACTTCCTGTCT	8.95672	-
GACTTCCTCAGA	8.95633	-
TCTGAGGAAGTC	8.95633	+
GACTTCCTTTCA	8.95512	-
TGAAAGGAAGTC	8.95512	+
CGCTTCCTCTGA	8.95088	-
TCAGAGGAAGCG	8.95088	+
TACTTCCTCACA	8.95027	-
TGTGAGGAAGTA	8.95027	+
ACACGGGAAGTG	8.94906	+
CACTTCCCGTGT	8.94906	-
CACTTCCCTATA	8.94879	-
TATAGGGAAGTG	8.94879	+
CACTTCCCCAGA	8.94261	-
TCTGGGGAAGTG	8.94261	+
GACTTCCCCTAA	8.94247	-
TTAGGGGAAGTC	8.94247	+
CACTTCCCTTCA	8.9414	-
TGAAGGGAAGTG	8.9414	+
CACTTCCTGTGA	8.93924	-
TCACAGGAAGTG	8.93924	+
CAGTTCCTCATC	8.93899	-
GATGAGGAACTG	8.93899	+
CAGTTCCTCTCC	8.9316	-
GGAGAGGAACTG	8.9316	+
ATAGAGGAAATG	8.91878	+
CATTTCCTCTAT	8.91878	-
AACTTCCTTTTC	8.91408	-
GAAAAGGAAGTT	8.91408	+
AAGTTCCTCATT	8.9135	-
AATGAGGAACTT	8.9135	+
AACTTCCTCTGC	8.9079	-
GCAGAGGAAGTT	8.9079	+
AGTGAGGAAGAG	8.90706	+
CTCTTCCTCACT	8.90706	-
AAGTTCCTCTCT	8.90611	-
AGAGAGGAACTT	8.90611	+
CATGAGGAAGCG	8.90303	+
CGCTTCCTCATG	8.90303	-
CGTGAGGAAGTC	8.90109	+
GACTTCCTCACG	8.90109	-
CACTTCCTCCAG	8.90088	-
CTGGAGGAAGTG	8.90088	+
GACTTCCCCCTA	8.89717	-
TAGGGGGAAGTC	8.89717	+
CGAGAGGAAGCG	8.89564	+
CGCTTCCTCTCG	8.89564	-
AATAAGGAACTG	8.89353	+
CAGTTCCTTATT	8.89353	-
CACTTCCTGATG	8.89139	-
CATCAGGAAGTG	8.89139	+
CACTTCCTTTGC	8.88793	-
GCAAAGGAAGTG	8.88793	+
CACTTCCCCACG	8.88738	-
CGTGGGGAAGTG	8.88738	+
ACTGAGGAACTG	8.88735	+
CAGTTCCTCAGT	8.88735	-
ATAGAGGAACTC	8.8872	+
GAGTTCCTCTAT	8.8872	-
AGAAAGGAACTG	8.88613	+
CAGTTCCTTTCT	8.88613	-
CACTTCCTGTCG	8.884	-
CGACAGGAAGTG	8.884	+
GTAGAGGAAGTA	8.88294	+
TACTTCCTCTAC	8.88294	-
AATGAAGAAGTG	8.87911	+
CACTTCTTCATT	8.87911	-
AAGGAGGAAATG	8.87349	+
CATTTCCTCCTT	8.87349	-
ATAGGGGAACTG	8.87348	+
CAGTTCCCCTAT	8.87348	-
AGAGAAGAAGTG	8.87172	+
CACTTCTTCTCT	8.87172	-
AGTGAGGAAGCC	8.86586	+
GGCTTCCTCACT	8.86586	-
ATGGAGGAAGCG	8.86564	+
CGCTTCCTCCAT	8.86564	-
CAGTTCCTCTAA	8.86366	-
TTAGAGGAACTG	8.86366	+
AACTTCCTTTGT	8.86243	-
ACAAAGGAAGTT	8.86243	+
AATCAGGAAGCG	8.85616	+
CGCTTCCTGATT	8.85616	-
AGTCAGGAAGTC	8.85422	+
GACTTCCTGACT	8.85422	-
ATGCAGGAAGTG	8.854	+
CACTTCCTGCAT	8.854	-
AGTGGGGAAGCG	8.85214	+
CGCTTCCCCACT	8.85214	-
AGACAGGAAGCG	8.84877	+
CGCTTCCTGTCT	8.84877	-
CGCTTCCTCACA	8.84232	-
TGTGAGGAAGCG	8.84232	+
AAGGAGGAACTC	8.84191	+
GAGTTCCTCCTT	8.84191	-
AGTCGGGAAGTG	8.8405	+
CACTTCCCGACT	8.8405	-
GAGGAGGAAGTA	8.83764	+
TACTTCCTCCTC	8.83764	-
ATAAAGGAAGTA	8.83747	+
TACTTCCTTTAT	8.83747	-
CACTTCCTGACA	8.83068	-
TGTCAGGAAGTG	8.83068	+
AAAGAGGAAGAA	8.82921	+
TTCTTCCTCTTT	8.82921	-
AAGGGGGAACTG	8.82819	+
CAGTTCCCCCTT	8.82819	-
CAGTTCCTCCTA	8.81837	-
TAGGAGGAACTG	8.81837	+
CAAGGGGAAGTA	8.80953	+
TACTTCCCCTTG	8.80953	-
AACTTCCTCACC	8.79934	-
GGTGAGGAAGTT	8.79934	+
AAGAAGGAAGTA	8.79218	+
TACTTCCTTCTT	8.79218	-
ACGGAGGAAGTA	8.786	+
TACTTCCTCCGT	8.786	-
AACTTCCTCTAG	8.78472	-
CTAGAGGAAGTT	8.78472	+
CATTTCCTCTTC	8.78283	-
GAAGAGGAAATG	8.78283	+
GACTTCCTCAAC	8.78043	-
GTTGAGGAAGTC	8.78043	+
CACTTCCTTACC	8.77936	-
GGTAAGGAAGTG	8.77936	+
CGCTTCCTCTAC	8.77498	-
GTAGAGGAAGCG	8.77498	+
AAAGGGGAAGCA	8.77429	+
TGCTTCCCCTTT	8.77429	-
CACTTCCCCAAC	8.76671	-
GTTGGGGAAGTG	8.76671	+
CACTTCCTTTAG	8.76475	-
CTAAAGGAAGTG	8.76475	+
TAAGAGGAAGCA	8.76447	+
TGCTTCCTCTTA	8.76447	-
CACTTCCTGTAC	8.76334	-
GTACAGGAAGTG	8.76334	+
AAACGGGAAGTA	8.76265	+
TACTTCCCGTTT	8.76265	-
GACTTCCCTTTA	8.76104	-
TAAAGGGAAGTC	8.76104	+
AAAGAGGAAATT	8.75733	+
AATTTCCTCTTT	8.75733	-
CAAGAGGAAGAG	8.75649	+
CTCTTCCTCTTG	8.75649	-
TACTTCCCCATA	8.7562	-
TATGGGGAAGTA	8.7562	+
GACTTCCCCTGA	8.75487	-
TCAGGGGAAGTC	8.75487	+
AACTTCCTTACT	8.75387	-
AGTAAGGAAGTT	8.75387	+
TAACAGGAAGTA	8.75283	+
TACTTCCTGTTA	8.75283	-
GAAGAGGAACTC	8.75124	+
GAGTTCCTCTTC	8.75124	-
AGCTTCCTCTAT	8.74948	-
ATAGAGGAAGCT	8.74948	+
TACTTCCCCTCA	8.74881	-
TGAGGGGAAGTA	8.74881	+
AACTTCCCCAAT	8.74122	-
ATTGGGGAAGTT	8.74122	+
AACTTCCTCCTG	8.73943	-
CAGGAGGAAGTT	8.73943	+
AACTTCCTGTAT	8.73785	-
ATACAGGAAGTT	8.73785	+
CAGTTCCCCTTC	8.73753	-
GAAGGGGAACTG	8.73753	+
AAAAAGGAAATG	8.73736	+
CATTTCCTTTTT	8.73736	-
ATTAAGGAAGTC	8.73496	+
GACTTCCTTAAT	8.73496	-
AACTTCCTCAAA	8.7314	-
TTTGAGGAAGTT	8.7314	+
ACAGAGGAAATG	8.73118	+
CATTTCCTCTGT	8.73118	-
CGCTTCCTCCTC	8.72968	-
GAGGAGGAAGCG	8.72968	+
ATAAAGGAAGCG	8.72951	+
CGCTTCCTTTAT	8.72951	-
GACTTCCTCCCC	8.72774	-
GGGGAGGAAGTC	8.72774	+
AATGAGGAAGAC	8.72671	+
GTCTTCCTCATT	8.72671	-
ATTAGGGAAGTG	8.72125	+
CACTTCCCTAAT	8.72125	-
CACTTCCTTCTG	8.71945	-
CAGAAGGAAGTG	8.71945	+
AGAGAGGAAGAC	8.71931	+
GTCTTCCTCTCT	8.71931	-
CACTTCCTGCTC	8.71805	-
GAGCAGGAAGTG	8.71805	+
CAAGAGGAAGCC	8.71528	+
GGCTTCCTCTTG	8.71528	-
CACTTCCCCCCC	8.71403	-
GGGGGGGAAGTG	8.71403	+
CACTTCCTCCGG	8.71328	-
CCGGAGGAAGTG	8.71328	+
AATGGGGAAGAG	8.71299	+
CTCTTCCCCATT	8.71299	-
AAAGGGGAACTT	8.71204	+
AAGTTCCCCTTT	8.71204	-
CACTTCCTTAAA	8.71142	-
TTTAAGGAAGTG	8.71142	+
AAACAGGAAGAG	8.70961	+
CTCTTCCTGTTT	8.70961	-
CATGGGGAAGTC	8.70702	+
GACTTCCCCATG	8.70702	-
AAAAAGGAACTC	8.70578	+
GAGTTCCTTTTT	8.70578	-
AGAGGGGAAGAG	8.7056	+
CTCTTCCCCTCT	8.7056	-
AAGGAGGAAGCT	8.70419	+
AGCTTCCTCCTT	8.70419	-
CAACAGGAAGTC	8.70364	+
GACTTCCTGTTG	8.70364	-
CTCTTCCTCATA	8.70317	-
TATGAGGAAGAG	8.70317	+
AAGTTCCTCTTA	8.70221	-
TAAGAGGAACTT	8.70221	+
CAAGGGGAAGCG	8.70157	+
CGCTTCCCCTTG	8.70157	-
GAAAAGGAAGTA	8.70152	+
TACTTCCTTTTC	8.70152	-
AATGAGGAACTA	8.70094	+
TAGTTCCTCATT	8.70094	-
CGAGGGGAAGTC	8.69963	+
GACTTCCCCTCG	8.69963	-
ACAGAGGAACTC	8.6996	+
GAGTTCCTCTGT	8.6996	-
CTCTTCCTCTCA	8.69577	-
TGAGAGGAAGAG	8.69577	+
GCAGAGGAAGTA	8.69534	+
TACTTCCTCTGC	8.69534	-
AGAGAGGAACTA	8.69355	+
TAGTTCCTCTCT	8.69355	-
AACTTCCTGCTT	8.69255	-
AAGCAGGAAGTT	8.69255	+
AAAAGGGAACTG	8.69206	+
CAGTTCCCTTTT	8.69206	-
AAAGAAGAAGTC	8.69136	+
GACTTCTTCTTT	8.69136	-
CAACGGGAAGTG	8.68993	+
CACTTCCCGTTG	8.68993	-
AACTTCCCCCCT	8.68854	-
AGGGGGGAAGTT	8.68854	+
ACAGGGGAACTG	8.68589	+
CAGTTCCCCTGT	8.68589	-
AAGAAGGAAGCG	8.68422	+
CGCTTCCTTCTT	8.68422	-
AGGAAGGAAGTC	8.68228	+
GACTTCCTTCCT	8.68228	-
CAGTTCCTTTTA	8.68224	-
TAAAAGGAACTG	8.68224	+
AACTTCCTCCCA	8.67871	-
TGGGAGGAAGTT	8.67871	+
ACGGAGGAAGCG	8.67804	+
CGCTTCCTCCGT	8.67804	-
AAAGGAGAAGTG	8.67765	+
CACTTCTCCTTT	8.67765	-
CAGTTCCTCTGA	8.67606	-
TCAGAGGAACTG	8.67606	+
AATGGGGAAGCC	8.67178	+
GGCTTCCCCATT	8.67178	-
ATGGGGGAAGTC	8.66963	+
GACTTCCCCCAT	8.66963	-
AGGAGGGAAGTG	8.66856	+
CACTTCCCTCCT	8.66856	-
AAACAGGAAGCC	8.66841	+
GGCTTCCTGTTT	8.66841	-
CACTTCTTCTTA	8.66782	-
TAAGAAGAAGTG	8.66782	+
ACGCAGGAAGTG	8.6664	+
CACTTCCTGCGT	8.6664	-
AGAGGGGAAGCC	8.66439	+
GGCTTCCCCTCT	8.66439	-
GGCTTCCTCATA	8.66196	-
TATGAGGAAGCC	8.66196	+
AATCGGGAAGTC	8.66014	+
GACTTCCCGATT	8.66014	-
GACTTCCTCCAA	8.6598	-
TTGGAGGAAGTC	8.6598	+
CACTTCCTTCCA	8.65874	-
TGGAAGGAAGTG	8.65874	+
AAACGGGAAGCG	8.65469	+
CGCTTCCCGTTT	8.65469	-
GGCTTCCTCTCA	8.65457	-
TGAGAGGAAGCC	8.65457	+
AGACGGGAAGTC	8.65275	+
GACTTCCCGTCT	8.65275	-
GACTTCCTGATA	8.65032	-
TATCAGGAAGTC	8.65032	+
ACAAAGGAAGTA	8.64987	+
TACTTCCTTTGT	8.64987	-
CGCTTCCCCATA	8.64824	-
TATGGGGAAGCG	8.64824	+
GACTTCCCCACA	8.6463	-
TGTGGGGAAGTC	8.6463	+
CACTTCCCCCAA	8.64609	-
TTGGGGGAAGTG	8.64609	+
CGCTTCCTGTTA	8.64487	-
TAACAGGAAGCG	8.64487	+
GACTTCCTGTCA	8.64293	-
TGACAGGAAGTC	8.64293	+
CGCTTCCCCTCA	8.64085	-
TGAGGGGAAGCG	8.64085	+
CACTTCCCGATA	8.6366	-
TATCGGGAAGTG	8.6366	+
AAAGCGGAAGTG	8.63094	+
CACTTCCGCTTT	8.63094	-
CACTTCCCGTCA	8.62921	-
TGACGGGAAGTG	8.62921	+
CAGTTCCTCATG	8.62821	-
CATGAGGAACTG	8.62821	+
AGTGAGGAAATG	8.62262	+
CATTTCCTCACT	8.62262	-
CAGTTCCTCTCG	8.62082	-
CGAGAGGAACTG	8.62082	+
AGCTTCCTCTTC	8.61353	-
GAAGAGGAAGCT	8.61353	+
AACTTCCCCATC	8.60526	-
GATGGGGAAGTT	8.60526	+
AACTTCCTTTTG	8.6033	-
CAAAAGGAAGTT	8.6033	+
AACTTCCTGTTC	8.60189	-
GAACAGGAAGTT	8.60189	+
GACTTCCTTATC	8.59901	-
GATAAGGAAGTC	8.59901	+
AACTTCCCCTCC	8.59787	-
GGAGGGGAAGTT	8.59787	+
AACTTCCTCTGG	8.59712	-
CCAGAGGAAGTT	8.59712	+
CGCTTCCTTTTC	8.59356	-
GAAAAGGAAGCG	8.59356	+
AATGAGGAACCG	8.59298	+
CGGTTCCTCATT	8.59298	-
GACTTCCTCAGC	8.59283	-
GCTGAGGAAGTC	8.59283	+
GACTTCCTTTCC	8.59161	-
GGAAAGGAAGTC	8.59161	+
AGTGAGGAACTC	8.59104	+
GAGTTCCTCACT	8.59104	-
ATGGAGGAACTG	8.59082	+
CAGTTCCTCCAT	8.59082	-
CGCTTCCTCTGC	8.58738	-
GCAGAGGAAGCG	8.58738	+
GGTGAGGAAGTA	8.58677	+
TACTTCCTCACC	8.58677	-
AGAGAGGAACCG	8.58559	+
CGGTTCCTCTCT	8.58559	-
CACTTCCCTATC	8.58529	-
GATAGGGAAGTG	8.58529	+
AATCAGGAACTG	8.58134	+
CAGTTCCTGATT	8.58134	-
CACTTCCCCAGC	8.57911	-
GCTGGGGAAGTG	8.57911	+
GACTTCCCCTAC	8.57896	-
GTAGGGGAAGTC	8.57896	+
CACTTCCCTTCC	8.5779	-
GGAAGGGAAGTG	8.5779	+
AGTGGGGAACTG	8.57732	+
CAGTTCCCCACT	8.57732	-
CACTTCCTTTGG	8.57715	-
CCAAAGGAAGTG	8.57715	+
CACTTCCTGTGC	8.57574	-
GCACAGGAAGTG	8.57574	+
AGACAGGAACTG	8.57395	+
CAGTTCCTGTCT	8.57395	-
CTAGAGGAAGTA	8.57216	+
TACTTCCTCTAG	8.57216	-
AAAAAGGAAGCT	8.56806	+
AGCTTCCTTTTT	8.56806	-
CAGTTCCTCACA	8.5675	-
TGTGAGGAACTG	8.5675	+
ACAGAGGAAGCT	8.56189	+
AGCTTCCTCTGT	8.56189	-
AACTTCCCTATT	8.5598	-
AATAGGGAAGTT	8.5598	+
AACTTCCCCAGT	8.55362	-
ACTGGGGAAGTT	8.55362	+
AACTTCCCTTCT	8.55241	-
AGAAGGGAAGTT	8.55241	+
AACTTCCTGTGT	8.55025	-
ACACAGGAAGTT	8.55025	+
AACTTCCTTATA	8.54998	-
TATAAGGAAGTT	8.54998	+
ACTAAGGAAGTC	8.54736	+
GACTTCCTTAGT	8.54736	-
AAAGAGGAAATA	8.54477	+
TATTTCCTCTTT	8.54477	-
AACTTCCTCAGA	8.5438	-
TCTGAGGAAGTT	8.5438	+
AACTTCCTTTCA	8.54258	-
TGAAAGGAAGTT	8.54258	+
ACAAAGGAAGCG	8.54191	+
CGCTTCCTTTGT	8.54191	-
AGTAAGGAAGTA	8.54131	+
TACTTCCTTACT	8.54131	-
ATAGAGGAAGCA	8.53692	+
TGCTTCCTCTAT	8.53692	-
GACTTCCCCCTC	8.53367	-
GAGGGGGAAGTC	8.53367	+
ACTAGGGAAGTG	8.53365	+
CACTTCCCTAGT	8.53365	-
ATAAGGGAAGTC	8.5335	+
GACTTCCCTTAT	8.5335	-
AACTTCCCCTAA	8.52993	-
TTAGGGGAAGTT	8.52993	+
ATTGGGGAAGTA	8.52866	+
TACTTCCCCAAT	8.52866	-
CAGGAGGAAGTA	8.52687	+
TACTTCCTCCTG	8.52687	-
ATACAGGAAGTA	8.52528	+
TACTTCCTGTAT	8.52528	-
AAAGGGGAAGAC	8.52524	+
GTCTTCCCCTTT	8.52524	-
CACTTCCTTAGA	8.52383	-
TCTAAGGAAGTG	8.52383	+
GACTTCCTTTAA	8.52368	-
TTAAAGGAAGTC	8.52368	+
TACTTCCTCAAA	8.51883	-
TTTGAGGAAGTA	8.51883	+
GTCTTCCTCTTA	8.51542	-
TAAGAGGAAGAC	8.51542	+
CACTTCCCTTAA	8.50996	-
TTAAGGGAAGTG	8.50996	+
CTCTTCCCCTTA	8.5017	-
TAAGGGGAAGAG	8.5017	+
CAGTTCCTCTAC	8.50016	-
GTAGAGGAACTG	8.50016	+
AAAGGGGAACTA	8.49947	+
TAGTTCCCCTTT	8.49947	-
AAGGAGGAAGCA	8.49163	+
TGCTTCCTCCTT	8.49163	-
TAAGAGGAACTA	8.48965	+
TAGTTCCTCTTA	8.48965	-
AACTTCCTCACG	8.48856	-
CGTGAGGAAGTT	8.48856	+
AAGAGGGAAGTC	8.48821	+
GACTTCCCTCTT	8.48821	-
AACTTCCCCCTA	8.48464	-
TAGGGGGAAGTT	8.48464	+
ACGGGGGAAGTC	8.48203	+
GACTTCCCCCGT	8.48203	-
AAGCAGGAAGTA	8.47999	+
TACTTCCTGCTT	8.47999	-
CGCTTCCTCACC	8.47882	-
GGTGAGGAAGCG	8.47882	+
GACTTCCTTCTA	8.47838	-
TAGAAGGAAGTC	8.47838	+
AGGGGGGAAGTA	8.47598	+
TACTTCCCCCCT	8.47598	-
ATTGAGGAAGAG	8.47562	+
CTCTTCCTCAAT	8.47562	-
AAGTTCCTCTAT	8.47467	-
ATAGAGGAACTT	8.47467	+
GACTTCCTCCGA	8.47221	-
TCGGAGGAAGTC	8.47221	+
CAAGAGGAAATG	8.47205	+
CATTTCCTCTTG	8.47205	-
CTTGAGGAAGTC	8.46965	+
GACTTCCTCAAG	8.46965	-
CACTTCCTTACG	8.46859	-
CGTAAGGAAGTG	8.46859	+
CACTTCCTGACC	8.46718	-
GGTCAGGAAGTG	8.46718	+
TACTTCCTCCCA	8.46615	-
TGGGAGGAAGTA	8.46615	+
CACTTCCCTCTA	8.46467	-
TAGAGGGAAGTG	8.46467	+
CGCTTCCTCTAG	8.4642	-
CTAGAGGAAGCG	8.4642	+
GGCTTCCCCTTA	8.4605	-
TAAGGGGAAGCC	8.4605	+
CACTTCCCCCGA	8.45849	-
TCGGGGGAAGTG	8.45849	+
CACTTCCCCAAG	8.45594	-
CTTGGGGAAGTG	8.45594	+
CAGTTCCTCCTC	8.45487	-
GAGGAGGAACTG	8.45487	+
ATAAAGGAACTG	8.45469	+
CAGTTCCTTTAT	8.45469	-
AGCTTCCTCACT	8.45332	-
AGTGAGGAAGCT	8.45332	+
CACTTCCTGTAG	8.45256	-
CTACAGGAAGTG	8.45256	+
GACTTCCCGTTA	8.44886	-
TAACGGGAAGTC	8.44886	+
AAAGAGGAACAG	8.44644	+
CTGTTCCTCTTT	8.44644	-
AATGAGGAAATC	8.44226	+
GATTTCCTCATT	8.44226	-
AACTTCCTGACT	8.44168	-
AGTCAGGAAGTT	8.44168	+
CAAGAGGAACTC	8.44046	+
GAGTTCCTCTTG	8.44046	-
ATAGAAGAAGTG	8.44028	+
CACTTCTTCTAT	8.44028	-
AAAGAGGAAACG	8.43681	+
CGTTTCCTCTTT	8.43681	-
AGAGAGGAAATC	8.43487	+
GATTTCCTCTCT	8.43487	-
ATTGAGGAAGCC	8.43441	+
GGCTTCCTCAAT	8.43441	-
AGTAAGGAAGCG	8.43335	+
CGCTTCCTTACT	8.43335	-
AAGGAGGAACTT	8.42937	+
AAGTTCCTCCTT	8.42937	-
AATGGGGAAATG	8.42855	+
CATTTCCCCATT	8.42855	-
CAAGGGGAACTG	8.42675	+
CAGTTCCCCTTG	8.42675	-
AAACAGGAAATG	8.42517	+
CATTTCCTGTTT	8.42517	-
AGGGAGGAAGAG	8.42294	+
CTCTTCCTCCCT	8.42294	-
ATTCAGGAAGTC	8.42277	+
GACTTCCTGAAT	8.42277	-
AGAGGGGAAATG	8.42116	+
CATTTCCCCTCT	8.42116	-
ATTGGGGAAGCG	8.4207	+
CGCTTCCCCAAT	8.4207	-
CAGGAGGAAGCG	8.41891	+
CGCTTCCTCCTG	8.41891	-
CATTTCCTCATA	8.41873	-
TATGAGGAAATG	8.41873	+
ATACAGGAAGCG	8.41732	+
CGCTTCCTGTAT	8.41732	-
CGGGAGGAAGTC	8.41696	+
GACTTCCTCCCG	8.41696	-
CATTTCCTCTCA	8.41133	-
TGAGAGGAAATG	8.41133	+
CGCTTCCTCAAA	8.41088	-
TTTGAGGAAGCG	8.41088	+
AAGAAGGAACTG	8.4094	+
CAGTTCCTTCTT	8.4094	-
ATTCGGGAAGTG	8.40906	+
CACTTCCCGAAT	8.40906	-
CACTTCCTGCTG	8.40727	-
CAGCAGGAAGTG	8.40727	+
AAAGAGGAACCC	8.40523	+
GGGTTCCTCTTT	8.40523	-
CACTTCCCCCCG	8.40325	-
CGGGGGGAAGTG	8.40325	+
ACGGAGGAACTG	8.40322	+
CAGTTCCTCCGT	8.40322	-
GAAGAGGAAGCA	8.40097	+
TGCTTCCTCTTC	8.40097	-
CACTTCCTGAAA	8.39924	-
TTTCAGGAAGTG	8.39924	+
GAAAGGGAAGTC	8.39754	+
GACTTCCCTTTC	8.39754	-
AATGGGGAACTC	8.39696	+
GAGTTCCCCATT	8.39696	-
AAGGAAGAAGTG	8.39499	+
CACTTCTTCCTT	8.39499	-
AAACAGGAACTC	8.39359	+
GAGTTCCTGTTT	8.39359	-
GATGGGGAAGTA	8.3927	+
TACTTCCCCATC	8.3927	-
AAAGGGGAACCG	8.39152	+
CGGTTCCCCTTT	8.39152	-
GACTTCCCCTGC	8.39137	-
GCAGGGGAAGTC	8.39137	+
CAAAAGGAAGTA	8.39074	+
TACTTCCTTTTG	8.39074	-
AGAGGGGAACTC	8.38957	+
GAGTTCCCCTCT	8.38957	-
GAACAGGAAGTA	8.38933	+
TACTTCCTGTTC	8.38933	-
GAGTTCCTCATA	8.38714	-
TATGAGGAACTC	8.38714	+
GGAGGGGAAGTA	8.38531	+
TACTTCCCCTCC	8.38531	-
CCAGAGGAAGTA	8.38456	+
TACTTCCTCTGG	8.38456	-
AGGGAGGAAGCC	8.38173	+
GGCTTCCTCCCT	8.38173	-
CGGTTCCTCTTA	8.38169	-
TAAGAGGAACCG	8.38169	+
AAACGGGAACTG	8.37988	+
CAGTTCCCGTTT	8.37988	-
GAGTTCCTCTCA	8.37975	-
TGAGAGGAACTC	8.37975	+
CAGTTCCCCATA	8.37343	-
TATGGGGAACTG	8.37343	+
AAGCAGGAAGCG	8.37203	+
CGCTTCCTGCTT	8.37203	-
AGGCAGGAAGTC	8.37009	+
GACTTCCTGCCT	8.37009	-
CAGTTCCTGTTA	8.37005	-
TAACAGGAACTG	8.37005	+
AGGGGGGAAGCG	8.36802	+
CGCTTCCCCCCT	8.36802	-
AACTTCCTCAAC	8.3679	-
GTTGAGGAAGTT	8.3679	+
CAGTTCCCCTCA	8.36603	-
TGAGGGGAACTG	8.36603	+
CGCTTCCTCCCA	8.35819	-
TGGGAGGAAGCG	8.35819	+
AGGCGGGAAGTG	8.35638	+
CACTTCCCGCCT	8.35638	-

## Sheet: Mac PWM
Macrophage derived consensus PWM (Pham et al., 2013)
>CACTTCCTCWTW
HOMER determined log-odds score treshold: 6.75164
A	C	G	T
0.177	0.447	0.2	0.178
0.672	0.058	0.178	0.093
0.019	0.627	0.271	0.084
0.032	0.009	0.009	0.951
0.012	0.012	0.013	0.964
0.011	0.958	0.007	0.025
0.005	0.837	0.005	0.154
0.068	0.305	0.144	0.485
0.073	0.509	0.152	0.267
0.349	0.178	0.062	0.413
0.23	0.224	0.108	0.44
0.275	0.205	0.104	0.418
Macrophage derived PU.1 PWM sequences in the mm9 genomic build
Sequence	Log_odds_score	Strand
AAAGAGGAAGTG	10.6818	-
CACTTCCTCTTT	10.6818	+
AATGAGGAAGTG	10.5134	-
CACTTCCTCATT	10.5134	+
CACTTCCTCTTA	10.2631	+
TAAGAGGAAGTG	10.2631	-
AAAGGGGAAGTG	10.218	-
CACTTCCCCTTT	10.218	+
CACTTCCTCATA	10.0947	+
TATGAGGAAGTG	10.0947	-
AATGGGGAAGTG	10.0496	-
CACTTCCCCATT	10.0496	+
AAAAAGGAAGTG	10.0366	-
CACTTCCTTTTT	10.0366	+
ATAGAGGAAGTG	10.0331	-
CACTTCCTCTAT	10.0331	+
AGAGAGGAAGTG	10.0067	-
CACTTCCTCTCT	10.0067	+
CACTTCCTCTTC	9.96934	+
GAAGAGGAAGTG	9.96934	-
AAAGAGGAAGTC	9.87757	-
GACTTCCTCTTT	9.87757	+
AATAAGGAAGTG	9.86824	-
CACTTCCTTATT	9.86824	+
ATTGAGGAAGTG	9.86474	-
CACTTCCTCAAT	9.86474	+
AAAGAGGAACTG	9.84298	-
CAGTTCCTCTTT	9.84298	+
AAGGAGGAAGTG	9.84015	-
CACTTCCTCCTT	9.84015	+
AGTGAGGAAGTG	9.83831	-
CACTTCCTCACT	9.83831	+
CACTTCCTCATC	9.80096	+
GATGAGGAAGTG	9.80096	-
CACTTCCCCTTA	9.79926	+
TAAGGGGAAGTG	9.79926	-
AAAGAGGAAGTA	9.76103	-
TACTTCCTCTTT	9.76103	+
AAAGAGGAAGTT	9.7554	-
AACTTCCTCTTT	9.7554	+
AATGAGGAAGTC	9.70919	-
GACTTCCTCATT	9.70919	+
AATGAGGAACTG	9.67461	-
CAGTTCCTCATT	9.67461	+
CACTTCCCCATA	9.63089	+
TATGGGGAAGTG	9.63089	-
CACTTCCTTTTA	9.6179	+
TAAAAGGAAGTG	9.6179	-
CACTTCCTCTAA	9.6144	+
TTAGAGGAAGTG	9.6144	-
AATGAGGAAGTA	9.59266	-
TACTTCCTCATT	9.59266	+
CACTTCCTCTCA	9.58797	+
TGAGAGGAAGTG	9.58797	-
AACTTCCTCATT	9.58703	+
AATGAGGAAGTT	9.58703	-
AAAAGGGAAGTG	9.57277	-
CACTTCCCTTTT	9.57277	+
ATAGGGGAAGTG	9.56928	-
CACTTCCCCTAT	9.56928	+
AGAGGGGAAGTG	9.54284	-
CACTTCCCCTCT	9.54284	+
CACTTCCCCTTC	9.5055	+
GAAGGGGAAGTG	9.5055	-
AAACAGGAAGTG	9.47324	-
CACTTCCTGTTT	9.47324	+
AAAGCGGAAGTG	9.46748	-
CACTTCCGCTTT	9.46748	+
GACTTCCTCTTA	9.45886	+
TAAGAGGAAGTC	9.45886	-
CACTTCCTTATA	9.44952	+
TATAAGGAAGTG	9.44952	-
CACTTCCTCAAA	9.44603	+
TTTGAGGAAGTG	9.44603	-
CAGTTCCTCTTA	9.42427	+
TAAGAGGAACTG	9.42427	-
CACTTCCTCCTA	9.42144	+
TAGGAGGAAGTG	9.42144	-
CACTTCCTCACA	9.4196	+
TGTGAGGAAGTG	9.4196	-
AAAGGGGAAGTC	9.41373	-
GACTTCCCCTTT	9.41373	+
AATAGGGAAGTG	9.4044	-
CACTTCCCTATT	9.4044	+
ATTGGGGAAGTG	9.4009	-
CACTTCCCCAAT	9.4009	+
ATAAAGGAAGTG	9.38792	-
CACTTCCTTTAT	9.38792	+
AAAGGGGAACTG	9.37914	-
CAGTTCCCCTTT	9.37914	+
AAGGGGGAAGTG	9.37631	-
CACTTCCCCCTT	9.37631	+
AGTGGGGAAGTG	9.37447	-
CACTTCCCCACT	9.37447	+
AGAAAGGAAGTG	9.36148	-
CACTTCCTTTCT	9.36148	+
AAAGAGGAAGCG	9.35334	-
CGCTTCCTCTTT	9.35334	+
TAAGAGGAAGTA	9.34233	-
TACTTCCTCTTA	9.34233	+
CACTTCCCCATC	9.33713	+
GATGGGGAAGTG	9.33713	-
AACTTCCTCTTA	9.33669	+
TAAGAGGAAGTT	9.33669	-
CACTTCCTTTTC	9.32414	+
GAAAAGGAAGTG	9.32414	-
CACTTCCTCTAC	9.32064	+
GTAGAGGAAGTG	9.32064	-
AATCAGGAAGTG	9.30487	-
CACTTCCTGATT	9.30487	+
AATGCGGAAGTG	9.2991	-
CACTTCCGCATT	9.2991	+
AAAGGGGAAGTA	9.2972	-
TACTTCCCCTTT	9.2972	+
CACTTCCTCTCC	9.29421	+
GGAGAGGAAGTG	9.29421	-
AAAGGGGAAGTT	9.29156	-
AACTTCCCCTTT	9.29156	+
CAAGAGGAAGTG	9.29072	-
CACTTCCTCTTG	9.29072	+
GACTTCCTCATA	9.29048	+
TATGAGGAAGTC	9.29048	-
ACAGAGGAAGTG	9.27717	-
CACTTCCTCTGT	9.27717	+
CAGTTCCTCATA	9.2559	+
TATGAGGAACTG	9.2559	-
AATGGGGAAGTC	9.24536	-
GACTTCCCCATT	9.24536	+
AAAAAGGAAGTC	9.23237	-
GACTTCCTTTTT	9.23237	+
ATAGAGGAAGTC	9.22887	-
GACTTCCTCTAT	9.22887	+
ATTAAGGAAGTG	9.21954	-
CACTTCCTTAAT	9.21954	+
AATGGGGAACTG	9.21077	-
CAGTTCCCCATT	9.21077	+
AGAGAGGAAGTC	9.20244	-
GACTTCCTCTCT	9.20244	+
AAAAAGGAACTG	9.19778	-
CAGTTCCTTTTT	9.19778	+
AAGAAGGAAGTG	9.19495	-
CACTTCCTTCTT	9.19495	+
ATAGAGGAACTG	9.19429	-
CAGTTCCTCTAT	9.19429	+
AGTAAGGAAGTG	9.19311	-
CACTTCCTTACT	9.19311	+
ATGGAGGAAGTG	9.19145	-
CACTTCCTCCAT	9.19145	+
AATGAGGAAGCG	9.18496	-
CGCTTCCTCATT	9.18496	+
TACTTCCTCATA	9.17395	+
TATGAGGAAGTA	9.17395	-
AACTTCCTCATA	9.16831	+
TATGAGGAAGTT	9.16831	-
AGAGAGGAACTG	9.16785	-
CAGTTCCTCTCT	9.16785	+
GAAGAGGAAGTC	9.1651	-
GACTTCCTCTTC	9.1651	+
AGGGAGGAAGTG	9.16502	-
CACTTCCTCCCT	9.16502	+
CACTTCCTTATC	9.15576	+
GATAAGGAAGTG	9.15576	-
CACTTCCCTTTA	9.15406	+
TAAAGGGAAGTG	9.15406	-
CACTTCCTCAAC	9.15227	+
GTTGAGGAAGTG	9.15227	-
CACTTCCCCTAA	9.15057	+
TTAGGGGAAGTG	9.15057	-
CAGTTCCTCTTC	9.13051	+
GAAGAGGAACTG	9.13051	-
AATGGGGAAGTA	9.12882	-
TACTTCCCCATT	9.12882	+
CACTTCCTCCTC	9.12767	+
GAGGAGGAAGTG	9.12767	-
CACTTCCTCACC	9.12584	+
GGTGAGGAAGTG	9.12584	-
CACTTCCCCTCA	9.12413	+
TGAGGGGAAGTG	9.12413	-
AACTTCCCCATT	9.12319	+
AATGGGGAAGTT	9.12319	-
CACTTCCTCATG	9.12234	+
CATGAGGAAGTG	9.12234	-
AAAAAGGAAGTA	9.11584	-
TACTTCCTTTTT	9.11584	+
ATAGAGGAAGTA	9.11234	-
TACTTCCTCTAT	9.11234	+
AAAAAGGAAGTT	9.1102	-
AACTTCCTTTTT	9.1102	+
ACTGAGGAAGTG	9.10879	-
CACTTCCTCAGT	9.10879	+
AACTTCCTCTAT	9.10671	+
ATAGAGGAAGTT	9.10671	-
AGAGAGGAAGTA	9.08591	-
TACTTCCTCTCT	9.08591	+
AACTTCCTCTCT	9.08027	+
AGAGAGGAAGTT	9.08027	-
AATAAGGAAGTC	9.06399	-
GACTTCCTTATT	9.06399	+
ATTGAGGAAGTC	9.0605	-
GACTTCCTCAAT	9.0605	+
CACTTCCTGTTA	9.05453	+
TAACAGGAAGTG	9.05453	-
CACTTCCGCTTA	9.04876	+
TAAGCGGAAGTG	9.04876	-
GAAGAGGAAGTA	9.04856	-
TACTTCCTCTTC	9.04856	+
AACTTCCTCTTC	9.04293	+
GAAGAGGAAGTT	9.04293	-
AAAGAGGAACTC	9.03874	-
GAGTTCCTCTTT	9.03874	+
AAGGAGGAAGTC	9.0359	-
GACTTCCTCCTT	9.0359	+
AGTGAGGAAGTC	9.03407	-
GACTTCCTCACT	9.03407	+
AATAAGGAACTG	9.02941	-
CAGTTCCTTATT	9.02941	+
ATTGAGGAACTG	9.02591	-
CAGTTCCTCAAT	9.02591	+
AAACGGGAAGTG	9.00941	-
CACTTCCCGTTT	9.00941	+
AAGGAGGAACTG	9.00132	-
CAGTTCCTCCTT	9.00132	+
AGTGAGGAACTG	8.99948	-
CAGTTCCTCACT	8.99948	+
GACTTCCTCATC	8.99672	+
GATGAGGAAGTC	8.99672	-
GACTTCCCCTTA	8.99502	+
TAAGGGGAAGTC	8.99502	-
AAAGAAGAAGTG	8.98894	-
CACTTCTTCTTT	8.98894	+
CACTTCCCTATA	8.98569	+
TATAGGGAAGTG	8.98569	-
CACTTCCCCAAA	8.98219	+
TTTGGGGAAGTG	8.98219	-
CACTTCCTTTAA	8.96921	+
TTAAAGGAAGTG	8.96921	-
CAGTTCCTCATC	8.96213	+
GATGAGGAACTG	8.96213	-
CAGTTCCCCTTA	8.96044	+
TAAGGGGAACTG	8.96044	-
CACTTCCCCCTA	8.9576	+
TAGGGGGAAGTG	8.9576	-
CACTTCCCCACA	8.95576	+
TGTGGGGAAGTG	8.95576	-
AATAAGGAAGTA	8.94746	-
TACTTCCTTATT	8.94746	+
ATTGAGGAAGTA	8.94396	-
TACTTCCTCAAT	8.94396	+
CACTTCCTTTCA	8.94277	+
TGAAAGGAAGTG	8.94277	-
AACTTCCTTATT	8.94183	+
AATAAGGAAGTT	8.94183	-
AACTTCCTCAAT	8.93833	+
ATTGAGGAAGTT	8.93833	-
CGCTTCCTCTTA	8.93463	+
TAAGAGGAAGCG	8.93463	-
ATAAGGGAAGTG	8.92408	-
CACTTCCCTTAT	8.92408	+
AAAGAGGAACTA	8.92221	-
TAGTTCCTCTTT	8.92221	+
AAGGAGGAAGTA	8.91937	-
TACTTCCTCCTT	8.91937	+
AGTGAGGAAGTA	8.91753	-
TACTTCCTCACT	8.91753	+
AAAGAGGAACTT	8.91657	-
AAGTTCCTCTTT	8.91657	+
AACTTCCTCCTT	8.91374	+
AAGGAGGAAGTT	8.91374	-
AACTTCCTCACT	8.9119	+
AGTGAGGAAGTT	8.9119	-
AGAAGGGAAGTG	8.89765	-
CACTTCCCTTCT	8.89765	+
AAAGGGGAAGCG	8.8895	-
CGCTTCCCCTTT	8.8895	+
CACTTCCTGATA	8.88616	+
TATCAGGAAGTG	8.88616	-
CACTTCCGCATA	8.88039	+
TATGCGGAAGTG	8.88039	-
GATGAGGAAGTA	8.88019	-
TACTTCCTCATC	8.88019	+
TAAGGGGAAGTA	8.87849	-
TACTTCCCCTTA	8.87849	+
AACTTCCTCATC	8.87455	+
GATGAGGAAGTT	8.87455	-
AACTTCCCCTTA	8.87285	+
TAAGGGGAAGTT	8.87285	-
AATGAGGAACTC	8.87037	-
GAGTTCCTCATT	8.87037	+
CACTTCCCTTTC	8.8603	+
GAAAGGGAAGTG	8.8603	-
CACTTCCTCTGA	8.85846	+
TCAGAGGAAGTG	8.85846	-
CACTTCCCCTAC	8.85681	+
GTAGGGGAAGTG	8.85681	-
AATCGGGAAGTG	8.84103	-
CACTTCCCGATT	8.84103	+
CACTTCCCCTCC	8.83037	+
GGAGGGGAAGTG	8.83037	-
CAAGGGGAAGTG	8.82688	-
CACTTCCCCTTG	8.82688	+
GACTTCCCCATA	8.82665	+
TATGGGGAAGTC	8.82665	-
ATACAGGAAGTG	8.82455	-
CACTTCCTGTAT	8.82455	+
AAAACGGAAGTG	8.82227	-
CACTTCCGTTTT	8.82227	+
AATGAAGAAGTG	8.82056	-
CACTTCTTCATT	8.82056	+
ATAGCGGAAGTG	8.81878	-
CACTTCCGCTAT	8.81878	+
GACTTCCTTTTA	8.81366	+
TAAAAGGAAGTC	8.81366	-
ACAGGGGAAGTG	8.81333	-
CACTTCCCCTGT	8.81333	+
GACTTCCTCTAA	8.81016	+
TTAGAGGAAGTC	8.81016	-
CACTTCCTTAAA	8.80083	+
TTTAAGGAAGTG	8.80083	-
AGACAGGAAGTG	8.79811	-
CACTTCCTGTCT	8.79811	+
AGAGCGGAAGTG	8.79235	-
CACTTCCGCTCT	8.79235	+
CAGTTCCCCATA	8.79206	+
TATGGGGAACTG	8.79206	-
AACGAGGAAGTG	8.7855	-
CACTTCCTCGTT	8.7855	+
GACTTCCTCTCA	8.78373	+
TGAGAGGAAGTC	8.78373	-
CAGTTCCTTTTA	8.77907	+
TAAAAGGAACTG	8.77907	-
CACTTCCTTCTA	8.77624	+
TAGAAGGAAGTG	8.77624	-
CAGTTCCTCTAA	8.77558	+
TTAGAGGAACTG	8.77558	-
CACTTCCTTACA	8.7744	+
TGTAAGGAAGTG	8.7744	-
CACTTCCTCCAA	8.77274	+
TTGGAGGAAGTG	8.77274	-
AAAAGGGAAGTC	8.76853	-
GACTTCCCTTTT	8.76853	+
CGCTTCCTCATA	8.76625	+
TATGAGGAAGCG	8.76625	-
ATAGGGGAAGTC	8.76504	-
GACTTCCCCTAT	8.76504	+
CACTTCCTGTTC	8.76077	+
GAACAGGAAGTG	8.76077	-
ATTAGGGAAGTG	8.7557	-
CACTTCCCTAAT	8.7557	+
CACTTCCGCTTC	8.755	+
GAAGCGGAAGTG	8.755	-
AATGAGGAACTA	8.75383	-
TAGTTCCTCATT	8.75383	+
CAGTTCCTCTCA	8.74914	+
TGAGAGGAACTG	8.74914	-
AAGTTCCTCATT	8.7482	+
AATGAGGAACTT	8.7482	-
CACTTCCTCCCA	8.74631	+
TGGGAGGAAGTG	8.74631	-
AAATAGGAAGTG	8.73982	-
CACTTCCTATTT	8.73982	+
AGAGGGGAAGTC	8.7386	-
GACTTCCCCTCT	8.7386	+
AAAAGGGAACTG	8.73395	-
CAGTTCCCTTTT	8.73395	+
AAGAGGGAAGTG	8.73111	-
CACTTCCCTCTT	8.73111	+
ATAGGGGAACTG	8.73045	-
CAGTTCCCCTAT	8.73045	+
AGTAGGGAAGTG	8.72927	-
CACTTCCCTACT	8.72927	+
ATGGGGGAAGTG	8.72761	-
CACTTCCCCCAT	8.72761	+
AATGGGGAAGCG	8.72112	-
CGCTTCCCCATT	8.72112	+
AAAGTGGAAGTG	8.71717	-
CACTTCCACTTT	8.71717	+
TACTTCCCCATA	8.71011	+
TATGGGGAAGTA	8.71011	-
AAAAAGGAAGCG	8.70814	-
CGCTTCCTTTTT	8.70814	+
ATAGAGGAAGCG	8.70464	-
CGCTTCCTCTAT	8.70464	+
AACTTCCCCATA	8.70448	+
TATGGGGAAGTT	8.70448	-
AAAGAGGAAGAG	8.70415	-
CTCTTCCTCTTT	8.70415	+
AGAGGGGAACTG	8.70402	-
CAGTTCCCCTCT	8.70402	+
GAAGGGGAAGTC	8.70126	-
GACTTCCCCTTC	8.70126	+
AGGGGGGAAGTG	8.70118	-
CACTTCCCCCCT	8.70118	+
TAAAAGGAAGTA	8.69713	-
TACTTCCTTTTA	8.69713	+
TACTTCCTCTAA	8.69363	+
TTAGAGGAAGTA	8.69363	-
CACTTCCCTATC	8.69193	+
GATAGGGAAGTG	8.69193	-
AACTTCCTTTTA	8.69149	+
TAAAAGGAAGTT	8.69149	-
CACTTCCTCAGA	8.69008	+
TCTGAGGAAGTG	8.69008	-
CACTTCCCCAAC	8.68843	+
GTTGGGGAAGTG	8.68843	-
AACTTCCTCTAA	8.688	+
TTAGAGGAAGTT	8.688	-
AGAGAGGAAGCG	8.67821	-
CGCTTCCTCTCT	8.67821	+
CACTTCCTTTAC	8.67544	+
GTAAAGGAAGTG	8.67544	-
AAAGAGGAAATG	8.67168	-
CATTTCCTCTTT	8.67168	+
AAACAGGAAGTC	8.669	-
GACTTCCTGTTT	8.669	+
TACTTCCTCTCA	8.6672	+
TGAGAGGAAGTA	8.6672	-
CAGTTCCCCTTC	8.66667	+
GAAGGGGAACTG	8.66667	-
CACTTCCCCCTC	8.66384	+
GAGGGGGAAGTG	8.66384	-
AAAGCGGAAGTC	8.66323	-
GACTTCCGCTTT	8.66323	+
CACTTCCCCACC	8.662	+
GGTGGGGAAGTG	8.662	-
AACTTCCTCTCA	8.66156	+
TGAGAGGAAGTT	8.66156	-
CACTTCCCCATG	8.65851	+
CATGGGGAAGTG	8.65851	-
ATTCAGGAAGTG	8.65617	-
CACTTCCTGAAT	8.65617	+
AATACGGAAGTG	8.6539	-
CACTTCCGTATT	8.6539	+
AAAAGGGAAGTA	8.652	-
TACTTCCCTTTT	8.652	+
ATTGCGGAAGTG	8.6504	-
CACTTCCGCAAT	8.6504	+
CACTTCCTTTCC	8.64901	+
GGAAAGGAAGTG	8.64901	-
ATAGGGGAAGTA	8.6485	-
TACTTCCCCTAT	8.6485	+
AAAAGGGAAGTT	8.64636	-
AACTTCCCTTTT	8.64636	+
CAAAAGGAAGTG	8.64552	-
CACTTCCTTTTG	8.64552	+
GACTTCCTTATA	8.64528	+
TATAAGGAAGTC	8.64528	-
ACTGGGGAAGTG	8.64495	-
CACTTCCCCAGT	8.64495	+
AACTTCCCCTAT	8.64287	+
ATAGGGGAAGTT	8.64287	-
CACTTCCTCTAG	8.64202	+
CTAGAGGAAGTG	8.64202	-
GACTTCCTCAAA	8.64179	+
TTTGAGGAAGTC	8.64179	-
CGCTTCCTCTTC	8.64086	+
GAAGAGGAAGCG	8.64086	-
AAACAGGAACTG	8.63442	-
CAGTTCCTGTTT	8.63442	+
ACAAAGGAAGTG	8.63197	-
CACTTCCTTTGT	8.63197	+
AAGCAGGAAGTG	8.63158	-
CACTTCCTGCTT	8.63158	+
AGTCAGGAAGTG	8.62974	-
CACTTCCTGACT	8.62974	+
AAAGCGGAACTG	8.62865	-
CAGTTCCGCTTT	8.62865	+
AAGGCGGAAGTG	8.62581	-
CACTTCCGCCTT	8.62581	+
AGTGCGGAAGTG	8.62397	-
CACTTCCGCACT	8.62397	+
AGAGGGGAAGTA	8.62207	-
TACTTCCCCTCT	8.62207	+
GAGTTCCTCTTA	8.62003	+
TAAGAGGAACTC	8.62003	-
GACTTCCTCCTA	8.6172	+
TAGGAGGAAGTC	8.6172	-
AACTTCCCCTCT	8.61644	+
AGAGGGGAAGTT	8.61644	-
CACTTCCTCTCG	8.61559	+
CGAGAGGAAGTG	8.61559	-
GACTTCCTCACA	8.61535	+
TGTGAGGAAGTC	8.61535	-
CAGTTCCTTATA	8.6107	+
TATAAGGAACTG	8.6107	-
CAGTTCCTCAAA	8.6072	+
TTTGAGGAACTG	8.6072	-
AATAGGGAAGTC	8.60016	-
GACTTCCCTATT	8.60016	+
ATTGGGGAAGTC	8.59666	-
GACTTCCCCAAT	8.59666	+
CACTTCCTGATC	8.5924	+
GATCAGGAAGTG	8.5924	-
CACTTCCCGTTA	8.5907	+
TAACGGGAAGTG	8.5907	-
CACTTCCGCATC	8.58663	+
GATGCGGAAGTG	8.58663	-
GAAGGGGAAGTA	8.58473	-
TACTTCCCCTTC	8.58473	+
ATAAAGGAAGTC	8.58367	-
GACTTCCTTTAT	8.58367	+
CAGTTCCTCCTA	8.58261	+
TAGGAGGAACTG	8.58261	-
CAGTTCCTCACA	8.58077	+
TGTGAGGAACTG	8.58077	-
AACTTCCCCTTC	8.57909	+
GAAGGGGAAGTT	8.57909	-
AAAGGGGAACTC	8.5749	-
GAGTTCCCCTTT	8.5749	+
AAGGGGGAAGTC	8.57207	-
GACTTCCCCCTT	8.57207	+
AATTAGGAAGTG	8.57145	-
CACTTCCTAATT	8.57145	+
CACTTCTTCTTA	8.57023	+
TAAGAAGAAGTG	8.57023	-
AGTGGGGAAGTC	8.57023	-
GACTTCCCCACT	8.57023	+
AATAGGGAACTG	8.56557	-
CAGTTCCCTATT	8.56557	+
CACTTCCTCTGC	8.5647	+
GCAGAGGAAGTG	8.5647	-
ATTGGGGAACTG	8.56207	-
CAGTTCCCCAAT	8.56207	+
AGAAAGGAAGTC	8.55724	-
GACTTCCTTTCT	8.55724	+
AAACAGGAAGTA	8.55247	-
TACTTCCTGTTT	8.55247	+
AAAGAGGAAGCC	8.54909	-
GGCTTCCTCTTT	8.54909	+
ATAAAGGAACTG	8.54909	-
CAGTTCCTTTAT	8.54909	+
AATGTGGAAGTG	8.54879	-
CACTTCCACATT	8.54879	+
AAACAGGAAGTT	8.54683	-
AACTTCCTGTTT	8.54683	+
AAAGCGGAAGTA	8.5467	-
TACTTCCGCTTT	8.5467	+
ATGAAGGAAGTG	8.54625	-
CACTTCCTTCAT	8.54625	+
AAAGCGGAAGTT	8.54107	-
AACTTCCGCTTT	8.54107	+
AATAAGGAAGCG	8.53976	-
CGCTTCCTTATT	8.53976	+
AAGGGGGAACTG	8.53748	-
CAGTTCCCCCTT	8.53748	+
ATTGAGGAAGCG	8.53626	-
CGCTTCCTCAAT	8.53626	+
AATGAGGAAGAG	8.53578	-
CTCTTCCTCATT	8.53578	+
AGTGGGGAACTG	8.53564	-
CAGTTCCCCACT	8.53564	+
GACTTCCCCATC	8.53289	+
GATGGGGAAGTC	8.53289	-
TACTTCCTTATA	8.52875	+
TATAAGGAAGTA	8.52875	-
TACTTCCTCAAA	8.52525	+
TTTGAGGAAGTA	8.52525	-
AAAGGAGAAGTG	8.5251	-
CACTTCTCCTTT	8.5251	+
AACTTCCTTATA	8.52312	+
TATAAGGAAGTT	8.52312	-
AGAAAGGAACTG	8.52266	-
CAGTTCCTTTCT	8.52266	+
GAAAAGGAAGTC	8.5199	-
GACTTCCTTTTC	8.5199	+
AGGAAGGAAGTG	8.51982	-
CACTTCCTTCCT	8.51982	+
AACTTCCTCAAA	8.51962	+
TTTGAGGAAGTT	8.51962	-
GACTTCCTCTAC	8.5164	+
GTAGAGGAAGTC	8.5164	-
AAAGAGGAACCG	8.51451	-
CGGTTCCTCTTT	8.51451	+
AAGGAGGAAGCG	8.51167	-
CGCTTCCTCCTT	8.51167	+
AGTGAGGAAGCG	8.50983	-
CGCTTCCTCACT	8.50983	+
CACTTCCTTAAC	8.50707	+
GTTAAGGAAGTG	8.50707	-
CACTTCCCTTAA	8.50537	+
TTAAGGGAAGTG	8.50537	-
TAAGAGGAACTA	8.5035	-
TAGTTCCTCTTA	8.5035	+
AATGAGGAAATG	8.5033	-
CATTTCCTCATT	8.5033	+
TACTTCCTCCTA	8.50066	+
TAGGAGGAAGTA	8.50066	-
AATCAGGAAGTC	8.50063	-
GACTTCCTGATT	8.50063	+
TACTTCCTCACA	8.49882	+
TGTGAGGAAGTA	8.49882	-
CAGTTCCCCATC	8.4983	+
GATGGGGAACTG	8.4983	-
AAGTTCCTCTTA	8.49786	+
TAAGAGGAACTT	8.49786	-
AACTTCCTCCTA	8.49503	+
TAGGAGGAAGTT	8.49503	-
AATGCGGAAGTC	8.49486	-
GACTTCCGCATT	8.49486	+
AACTTCCTCACA	8.49319	+
TGTGAGGAAGTT	8.49319	-
GACTTCCTCTCC	8.48997	+
GGAGAGGAAGTC	8.48997	-
CAAGAGGAAGTC	8.48648	-
GACTTCCTCTTG	8.48648	+
CAGTTCCTTTTC	8.48531	+
GAAAAGGAACTG	8.48531	-
AATAGGGAAGTA	8.48362	-
TACTTCCCTATT	8.48362	+
CACTTCCTTCTC	8.48248	+
GAGAAGGAAGTG	8.48248	-
CAGTTCCTCTAC	8.48182	+
GTAGAGGAACTG	8.48182	-
CACTTCCTTACC	8.48063	+
GGTAAGGAAGTG	8.48063	-
ATTGGGGAAGTA	8.48013	-
TACTTCCCCAAT	8.48013	+
CACTTCCTCCAC	8.47898	+
GTGGAGGAAGTG	8.47898	-
CACTTCCCTTCA	8.47893	+
TGAAGGGAAGTG	8.47893	-
AACTTCCCTATT	8.47799	+
AATAGGGAAGTT	8.47799	-
CACTTCCTTATG	8.47715	+
CATAAGGAAGTG	8.47715	-
AACTTCCCCAAT	8.47449	+
ATTGGGGAAGTT	8.47449	-
CACTTCCTCAAG	8.47365	+
CTTGAGGAAGTG	8.47365	-
ACAGAGGAAGTC	8.47293	-
GACTTCCTCTGT	8.47293	+
CGCTTCCTCATC	8.47249	+
GATGAGGAAGCG	8.47249	-
CGCTTCCCCTTA	8.47079	+
TAAGGGGAAGCG	8.47079	-
ATAAAGGAAGTA	8.46714	-
TACTTCCTTTAT	8.46714	+
AATCAGGAACTG	8.46604	-
CAGTTCCTGATT	8.46604	+
ACTAAGGAAGTG	8.46359	-
CACTTCCTTAGT	8.46359	+
AACTTCCTTTAT	8.46151	+
ATAAAGGAAGTT	8.46151	-
AATGCGGAACTG	8.46027	-
CAGTTCCGCATT	8.46027	+
AAAGGGGAACTA	8.45837	-
TAGTTCCCCTTT	8.45837	+
AAGGGGGAAGTA	8.45553	-
TACTTCCCCCTT	8.45553	+
CAGTTCCTCTCC	8.45538	+
GGAGAGGAACTG	8.45538	-
AGTGGGGAAGTA	8.45369	-
TACTTCCCCACT	8.45369	+
AAAGGGGAACTT	8.45274	-
AAGTTCCCCTTT	8.45274	+
CACTTCCTCCCC	8.45255	+
GGGGAGGAAGTG	8.45255	-
CAAGAGGAACTG	8.45189	-
CAGTTCCTCTTG	8.45189	+
GAGTTCCTCATA	8.45166	+
TATGAGGAACTC	8.45166	-
AACTTCCCCCTT	8.4499	+
AAGGGGGAAGTT	8.4499	-
CACTTCCTCCTG	8.44906	+
CAGGAGGAAGTG	8.44906	-
AACTTCCCCACT	8.44806	+
AGTGGGGAAGTT	8.44806	-
CACTTCCTCACG	8.44721	+
CGTGAGGAAGTG	8.44721	-
AGAAAGGAAGTA	8.44071	-
TACTTCCTTTCT	8.44071	+
ACAGAGGAACTG	8.43834	-
CAGTTCCTCTGT	8.43834	+
ACGGAGGAAGTG	8.4355	-
CACTTCCTCCGT	8.4355	+
AACTTCCTTTCT	8.43507	+
AGAAAGGAAGTT	8.43507	-
AAAGAGGAAGCA	8.43256	-
TGCTTCCTCTTT	8.43256	+
AAAGAGGAAGCT	8.42693	-
AGCTTCCTCTTT	8.42693	+
CACTTCCCGATA	8.42232	+
TATCGGGAAGTG	8.42232	-
GATGGGGAAGTA	8.41635	-
TACTTCCCCATC	8.41635	+
ATTAAGGAAGTC	8.4153	-
GACTTCCTTAAT	8.4153	+
AACTTCCCCATC	8.41072	+
GATGGGGAAGTT	8.41072	-
AATGGGGAACTC	8.40653	-
GAGTTCCCCATT	8.40653	+
CACTTCCTGTAA	8.40584	+
TTACAGGAAGTG	8.40584	-
CACTTCCGTTTA	8.40357	+
TAAACGGAAGTG	8.40357	-
GAAAAGGAAGTA	8.40336	-
TACTTCCTTTTC	8.40336	+
CACTTCTTCATA	8.40185	+
TATGAAGAAGTG	8.40185	-
CACTTCCGCTAA	8.40007	+
TTAGCGGAAGTG	8.40007	-
GTAGAGGAAGTA	8.39987	-
TACTTCCTCTAC	8.39987	+
AACTTCCTTTTC	8.39773	+
GAAAAGGAAGTT	8.39773	-
CACTTCCTCAGC	8.39632	+
GCTGAGGAAGTG	8.39632	-
CACTTCCCCTGA	8.39462	+
TCAGGGGAAGTG	8.39462	-
AACTTCCTCTAC	8.39424	+
GTAGAGGAAGTT	8.39424	-
AAAAAGGAACTC	8.39354	-
GAGTTCCTTTTT	8.39354	+
AAGAAGGAAGTC	8.39071	-
GACTTCCTTCTT	8.39071	+
ATAGAGGAACTC	8.39005	-
GAGTTCCTCTAT	8.39005	+
AGTAAGGAAGTC	8.38886	-
GACTTCCTTACT	8.38886	+
ATGGAGGAAGTC	8.38721	-
GACTTCCTCCAT	8.38721	+
AATCAGGAAGTA	8.38409	-
TACTTCCTGATT	8.38409	+
AATGAGGAAGCC	8.38072	-
GGCTTCCTCATT	8.38072	+
ATTAAGGAACTG	8.38071	-
CAGTTCCTTAAT	8.38071	+
CACTTCCTGTCA	8.3794	+
TGACAGGAAGTG	8.3794	-
AACTTCCTGATT	8.37846	+
AATCAGGAAGTT	8.37846	-
AATGCGGAAGTA	8.37832	-
TACTTCCGCATT	8.37832	+
CACTTCCGCTCA	8.37364	+
TGAGCGGAAGTG	8.37364	-
GGAGAGGAAGTA	8.37344	-
TACTTCCTCTCC	8.37344	+
AACTTCCGCATT	8.37269	+
AATGCGGAAGTT	8.37269	-
CAAGAGGAAGTA	8.36994	-
TACTTCCTCTTG	8.36994	+
AACTTCCTCTCC	8.3678	+
GGAGAGGAAGTT	8.3678	-
CACTTCCTCGTA	8.36679	+
TACGAGGAAGTG	8.36679	-
AACTTCCTCTTG	8.36431	+
CAAGAGGAAGTT	8.36431	-
AGAGAGGAACTC	8.36361	-
GAGTTCCTCTCT	8.36361	+
AGGGAGGAAGTC	8.36078	-
GACTTCCTCCCT	8.36078	+
ATACGGGAAGTG	8.36071	-
CACTTCCCGTAT	8.36071	+
AATGGAGAAGTG	8.35673	-
CACTTCTCCATT	8.35673	+
ACAGAGGAAGTA	8.35639	-
TACTTCCTCTGT	8.35639	+
AAGAAGGAACTG	8.35612	-
CAGTTCCTTCTT	8.35612	+
AGTAAGGAACTG	8.35428	-
CAGTTCCTTACT	8.35428	+
ATGGAGGAACTG	8.35262	-
CAGTTCCTCCAT	8.35262	+
GACTTCCTTATC	8.35152	+
GATAAGGAAGTC	8.35152	-
AACTTCCTCTGT	8.35076	+
ACAGAGGAAGTT	8.35076	-
GACTTCCCTTTA	8.34982	+
TAAAGGGAAGTC	8.34982	-
GACTTCCTCAAC	8.34803	+
GTTGAGGAAGTC	8.34803	-
GACTTCCCCTAA	8.34633	+
TTAGGGGAAGTC	8.34633	-
AATGAGGAACCG	8.34613	-
CGGTTCCTCATT	8.34613	+
AAAAAAGAAGTG	8.34374	-
CACTTCTTTTTT	8.34374	+
ATAGAAGAAGTG	8.34024	-
CACTTCTTCTAT	8.34024	+
CACTTCCCTAAA	8.33699	+
TTTAGGGAAGTG	8.33699	-
TAGTTCCTCATA	8.33512	+
TATGAGGAACTA	8.33512	-
AGACGGGAAGTG	8.33428	-
CACTTCCCGTCT	8.33428	+
AAGTTCCTCATA	8.32949	+
TATGAGGAACTT	8.32949	-
GAAGAGGAACTC	8.32627	-
GAGTTCCTCTTC	8.32627	+
AGGGAGGAACTG	8.32619	-
CAGTTCCTCCCT	8.32619	+
GACTTCCTCCTC	8.32343	+
GAGGAGGAAGTC	8.32343	-
AACGGGGAAGTG	8.32166	-
CACTTCCCCGTT	8.32166	+
GACTTCCTCACC	8.32159	+
GGTGAGGAAGTC	8.32159	-
CACTTCCTATTA	8.32111	+
TAATAGGAAGTG	8.32111	-
GACTTCCCCTCA	8.31989	+
TGAGGGGAAGTC	8.31989	-
CATGAGGAAGTC	8.3181	-
GACTTCCTCATG	8.3181	+
CAGTTCCTTATC	8.31694	+
GATAAGGAACTG	8.31694	-
CAGTTCCCTTTA	8.31524	+
TAAAGGGAACTG	8.31524	-
AGAGAAGAAGTG	8.31381	-
CACTTCTTCTCT	8.31381	+
CAGTTCCTCAAC	8.31344	+
GTTGAGGAACTG	8.31344	-
CACTTCCCTCTA	8.3124	+
TAGAGGGAAGTG	8.3124	-
CAGTTCCCCTAA	8.31174	+
TTAGGGGAACTG	8.31174	-
CACTTCCCTACA	8.31056	+
TGTAGGGAAGTG	8.31056	-
CACTTCCCCCAA	8.3089	+
TTGGGGGAAGTG	8.3089	-
ACTGAGGAAGTC	8.30455	-
GACTTCCTCAGT	8.30455	+
CGCTTCCCCATA	8.30241	+
TATGGGGAAGCG	8.30241	-
ATTAAGGAAGTA	8.29876	-
TACTTCCTTAAT	8.29876	+
CACTTCCACTTA	8.29846	+
TAAGTGGAAGTG	8.29846	-
CACTTCCCGTTC	8.29693	+
GAACGGGAAGTG	8.29693	-
AACTTCCTTAAT	8.29313	+
ATTAAGGAAGTT	8.29313	-
AATGGGGAACTA	8.28999	-
TAGTTCCCCATT	8.28999	+
CGCTTCCTTTTA	8.28943	+
TAAAAGGAAGCG	8.28943	-
CAGTTCCTCCTC	8.28885	+
GAGGAGGAACTG	8.28885	-
CAGTTCCTCACC	8.28701	+
GGTGAGGAACTG	8.28701	-
CGCTTCCTCTAA	8.28593	+
TTAGAGGAAGCG	8.28593	-
CTCTTCCTCTTA	8.28544	+
TAAGAGGAAGAG	8.28544	-
CAGTTCCCCTCA	8.28531	+
TGAGGGGAACTG	8.28531	-
AAGTTCCCCATT	8.28436	+
AATGGGGAACTT	8.28436	-
CAGTTCCTCATG	8.28352	+
CATGAGGAACTG	8.28352	-
CACTTCCCCCCA	8.28247	+
TGGGGGGAAGTG	8.28247	-
AAAAAGGAACTA	8.27701	-
TAGTTCCTTTTT	8.27701	+
CACTTCTTCTTC	8.27647	+
GAAGAAGAAGTG	8.27647	-
AAATGGGAAGTG	8.27599	-
CACTTCCCATTT	8.27599	+
AAGAAGGAAGTA	8.27417	-
TACTTCCTTCTT	8.27417	+
ATAGAGGAACTA	8.27351	-
TAGTTCCTCTAT	8.27351	+
AGTAAGGAAGTA	8.27233	-
TACTTCCTTACT	8.27233	+
AAAAAGGAACTT	8.27137	-
AAGTTCCTTTTT	8.27137	+
ATGGAGGAAGTA	8.27068	-
TACTTCCTCCAT	8.27068	+
ACTGAGGAACTG	8.26996	-
CAGTTCCTCAGT	8.26996	+
AACTTCCTTCTT	8.26854	+
AAGAAGGAAGTT	8.26854	-
AAGTTCCTCTAT	8.26788	+
ATAGAGGAACTT	8.26788	-
AACTTCCTTACT	8.2667	+
AGTAAGGAAGTT	8.2667	-
AACTTCCTCCAT	8.26504	+
ATGGAGGAAGTT	8.26504	-
AATGAGGAAGCA	8.26418	-
TGCTTCCTCATT	8.26418	+
CGCTTCCTCTCA	8.2595	+
TGAGAGGAAGCG	8.2595	-
AAACCGGAAGTG	8.25891	-
CACTTCCGGTTT	8.25891	+
AATGAGGAAGCT	8.25855	-
AGCTTCCTCATT	8.25855	+
CATTTCCTCTTA	8.25297	+
TAAGAGGAAATG	8.25297	-
GACTTCCTGTTA	8.25029	+
TAACAGGAAGTC	8.25029	-
AGAGAGGAACTA	8.24708	-
TAGTTCCTCTCT	8.24708	+
GACTTCCGCTTA	8.24452	+
TAAGCGGAAGTC	8.24452	-
AAAAGGGAAGCG	8.2443	-
CGCTTCCCTTTT	8.2443	+
AGGGAGGAAGTA	8.24424	-
TACTTCCTCCCT	8.24424	+
AAGTTCCTCTCT	8.24145	+
AGAGAGGAACTT	8.24145	-
ATAGGGGAAGCG	8.2408	-
CGCTTCCCCTAT	8.2408	+
AAAGGGGAAGAG	8.24031	-
CTCTTCCCCTTT	8.24031	+
AACTTCCTCCCT	8.23861	+
AGGGAGGAAGTT	8.23861	-
CACTTCCTGAAA	8.23746	+
TTTCAGGAAGTG	8.23746	-
CACTTCCGTATA	8.23519	+
TATACGGAAGTG	8.23519	-
GATAAGGAAGTA	8.23499	-
TACTTCCTTATC	8.23499	+
TAAAGGGAAGTA	8.23329	-
TACTTCCCTTTA	8.23329	+
AAAGAGGAAGGG	8.23199	-
CCCTTCCTCTTT	8.23199	+
CACTTCCGCAAA	8.23169	+
TTTGCGGAAGTG	8.23169	-
GTTGAGGAAGTA	8.23149	-
TACTTCCTCAAC	8.23149	+
TACTTCCCCTAA	8.22979	+
TTAGGGGAAGTA	8.22979	-
AACTTCCTTATC	8.22935	+
GATAAGGAAGTT	8.22935	-
AACTTCCCTTTA	8.22766	+
TAAAGGGAAGTT	8.22766	-
CACTTCCCCAGA	8.22624	+
TCTGGGGAAGTG	8.22624	-
AACTTCCTCAAC	8.22586	+
GTTGAGGAAGTT	8.22586	-
AATAAGGAACTC	8.22517	-
GAGTTCCTTATT	8.22517	+
AACTTCCCCTAA	8.22416	+
TTAGGGGAAGTT	8.22416	-
ATTGAGGAACTC	8.22167	-
GAGTTCCTCAAT	8.22167	+
CAGTTCCTGTTA	8.2157	+
TAACAGGAACTG	8.2157	-
AGAGGGGAAGCG	8.21437	-
CGCTTCCCCTCT	8.21437	+
CACTTCCTTTGA	8.21326	+
TCAAAGGAAGTG	8.21326	-
CACTTCCTGCTA	8.21287	+
TAGCAGGAAGTG	8.21287	-
CACTTCCCTTAC	8.21161	+
GTAAGGGAAGTG	8.21161	-
CACTTCCTGACA	8.21103	+
TGTCAGGAAGTG	8.21103	-
CAGTTCCGCTTA	8.20994	+
TAAGCGGAACTG	8.20994	-
GAAGAGGAACTA	8.20974	-
TAGTTCCTCTTC	8.20974	+
AAAGGGGAAATG	8.20784	-
CATTTCCCCTTT	8.20784	+
CACTTCCGCCTA	8.2071	+
TAGGCGGAAGTG	8.2071	-
GAGGAGGAAGTA	8.2069	-
TACTTCCTCCTC	8.2069	+
CACTTCCGCACA	8.20526	+
TGTGCGGAAGTG	8.20526	-
AAACGGGAAGTC	8.20516	-
GACTTCCCGTTT	8.20516	+
GGTGAGGAAGTA	8.20506	-
TACTTCCTCACC	8.20506	+
AAGTTCCTCTTC	8.2041	+
GAAGAGGAACTT	8.2041	-
TACTTCCCCTCA	8.20336	+
TGAGGGGAAGTA	8.20336	-
CATGAGGAAGTA	8.20157	-
TACTTCCTCATG	8.20157	+
AACTTCCTCCTC	8.20127	+
GAGGAGGAAGTT	8.20127	-
AACTTCCTCACC	8.19943	+
GGTGAGGAAGTT	8.19943	-
AACTTCCCCTCA	8.19773	+
TGAGGGGAAGTT	8.19773	-
AAGGAGGAACTC	8.19708	-
GAGTTCCTCCTT	8.19708	+
AACTTCCTCATG	8.19594	+
CATGAGGAAGTT	8.19594	-
AGTGAGGAACTC	8.19524	-
GAGTTCCTCACT	8.19524	+
ATTCGGGAAGTG	8.19233	-
CACTTCCCGAAT	8.19233	+
ACTGAGGAAGTA	8.18802	-
TACTTCCTCAGT	8.18802	+
CACTTCCCTTCC	8.18517	+
GGAAGGGAAGTG	8.18517	-
AAAGAAGAAGTC	8.1847	-
GACTTCTTCTTT	8.1847	+
AACTTCCTCAGT	8.18238	+
ACTGAGGAAGTT	8.18238	-
CAAAGGGAAGTG	8.18168	-
CACTTCCCTTTG	8.18168	+
GACTTCCCTATA	8.18145	+
TATAGGGAAGTC	8.18145	-
CACTTCCCCTAG	8.17819	+
CTAGGGGAAGTG	8.17819	-
GACTTCCCCAAA	8.17795	+
TTTGGGGAAGTC	8.17795	-
CGCTTCCCCTTC	8.17703	+
GAAGGGGAAGCG	8.17703	-
AATAAAGAAGTG	8.17536	-
CACTTCTTTATT	8.17536	+
ATAACGGAAGTG	8.17358	-
CACTTCCGTTAT	8.17358	+
ATTGAAGAAGTG	8.17187	-
CACTTCTTCAAT	8.17187	+
AAACGGGAACTG	8.17058	-
CAGTTCCCGTTT	8.17058	+
ACAAGGGAAGTG	8.16813	-
CACTTCCCTTGT	8.16813	+
AAGCGGGAAGTG	8.16774	-
CACTTCCCGCTT	8.16774	+
AGTCGGGAAGTG	8.1659	-
CACTTCCCGACT	8.1659	+
GACTTCCTTTAA	8.16496	+
TTAAAGGAAGTC	8.16496	-
GAGTTCCTCATC	8.15789	+
GATGAGGAACTC	8.15789	-
GAGTTCCCCTTA	8.15619	+
TAAGGGGAACTC	8.15619	-
GACTTCCCCCTA	8.15336	+
TAGGGGGAAGTC	8.15336	-
CACTTCCTAATA	8.15274	+
TATTAGGAAGTG	8.15274	-
CACTTCCCCTCG	8.15175	+
CGAGGGGAAGTG	8.15175	-
GACTTCCCCACA	8.15152	+
TGTGGGGAAGTC	8.15152	-
AAAGAAGAACTG	8.15011	-
CAGTTCTTCTTT	8.15011	+
AAGGAAGAAGTG	8.14728	-
CACTTCTTCCTT	8.14728	+
AGAACGGAAGTG	8.14715	-
CACTTCCGTTCT	8.14715	+
CAGTTCCCTATA	8.14686	+
TATAGGGAACTG	8.14686	-
AGTGAAGAAGTG	8.14544	-
CACTTCTTCACT	8.14544	+
AAACAGGAAGCG	8.14477	-
CGCTTCCTGTTT	8.14477	+
CAGTTCCCCAAA	8.14336	+
TTTGGGGAACTG	8.14336	-
AACAAGGAAGTG	8.1403	-
CACTTCCTTGTT	8.1403	+
AAAGCGGAAGCG	8.139	-
CGCTTCCGCTTT	8.139	+
GACTTCCTTTCA	8.13853	+
TGAAAGGAAGTC	8.13853	-
ATCGAGGAAGTG	8.1368	-
CACTTCCTCGAT	8.1368	+
TAACAGGAAGTA	8.13376	-
TACTTCCTGTTA	8.13376	+
GGCTTCCTCTTA	8.13038	+
TAAGAGGAAGCC	8.13038	-
CAGTTCCTTTAA	8.13038	+
TTAAAGGAACTG	8.13038	-
CACTTCCACATA	8.13008	+
TATGTGGAAGTG	8.13008	-
CACTTCCCGATC	8.12856	+
GATCGGGAAGTG	8.12856	-
AACTTCCTGTTA	8.12812	+
TAACAGGAAGTT	8.12812	-
TAAGCGGAAGTA	8.12799	-
TACTTCCGCTTA	8.12799	+
CACTTCCTTCAA	8.12754	+
TTGAAGGAAGTG	8.12754	-
AACTTCCGCTTA	8.12236	+
TAAGCGGAAGTT	8.12236	-
CGCTTCCTTATA	8.12105	+
TATAAGGAAGCG	8.12105	-
ATAAGGGAAGTC	8.11984	-
GACTTCCCTTAT	8.11984	+
CAGTTCCCCCTA	8.11877	+
TAGGGGGAACTG	8.11877	-
CGCTTCCTCAAA	8.11755	+
TTTGAGGAAGCG	8.11755	-
CTCTTCCTCATA	8.11707	+
TATGAGGAAGAG	8.11707	-
CAGTTCCCCACA	8.11693	+
TGTGGGGAACTG	8.11693	-
CACTTCCTGTAC	8.11208	+
GTACAGGAAGTG	8.11208	-
AGCGAGGAAGTG	8.11037	-
CACTTCCTCGCT	8.11037	+
CACTTCCGTTTC	8.1098	+
GAAACGGAAGTG	8.1098	-
AATAAGGAACTA	8.10863	-
TAGTTCCTTATT	8.10863	+
CACTTCTTCATC	8.10809	+
GATGAAGAAGTG	8.10809	-
AATTGGGAAGTG	8.10761	-
CACTTCCCAATT	8.10761	+
CACTTCTCCTTA	8.10639	+
TAAGGAGAAGTG	8.10639	-
CACTTCCGCTAC	8.10631	+
GTAGCGGAAGTG	8.10631	-
ATTGAGGAACTA	8.10514	-
TAGTTCCTCAAT	8.10514	+
CAGTTCCTTTCA	8.10394	+
TGAAAGGAACTG	8.10394	-
AAGTTCCTTATT	8.103	+
AATAAGGAACTT	8.103	-
CACTTCCTTCCA	8.10111	+
TGGAAGGAAGTG	8.10111	-
CACTTCCCCTGC	8.10086	+
GCAGGGGAAGTG	8.10086	-
AAGTTCCTCAAT	8.0995	+
ATTGAGGAACTT	8.0995	-
CGGTTCCTCTTA	8.0958	+
TAAGAGGAACCG	8.0958	-
AGAAGGGAAGTC	8.0934	-
GACTTCCCTTCT	8.0934	+
CGCTTCCTCCTA	8.09296	+
TAGGAGGAAGCG	8.09296	-
ATATAGGAAGTG	8.09113	-
CACTTCCTATAT	8.09113	+
CGCTTCCTCACA	8.09112	+
TGTGAGGAAGCG	8.09112	-
AATCCGGAAGTG	8.09053	-
CACTTCCGGATT	8.09053	+
AAACGGGAAGTA	8.08863	-
TACTTCCCGTTT	8.08863	+
CACTTCCTGTCC	8.08564	+
GGACAGGAAGTG	8.08564	-
AAAGGGGAAGCC	8.08526	-
GGCTTCCCCTTT	8.08526	+
ATAAGGGAACTG	8.08525	-
CAGTTCCCTTAT	8.08525	+
CATTTCCTCATA	8.0846	+
TATGAGGAAATG	8.0846	-
AAACGGGAAGTT	8.083	-
AACTTCCCGTTT	8.083	+
ATGAGGGAAGTG	8.08241	-
CACTTCCCTCAT	8.08241	+
CAACAGGAAGTG	8.08215	-
CACTTCCTGTTG	8.08215	+
GACTTCCTGATA	8.08192	+
TATCAGGAAGTC	8.08192	-
AAGGAGGAACTA	8.08054	-
TAGTTCCTCCTT	8.08054	+
CACTTCCGCTCC	8.07987	+
GGAGCGGAAGTG	8.07987	-
AGTGAGGAACTA	8.0787	-
TAGTTCCTCACT	8.0787	+
CAAGCGGAAGTG	8.07638	-
CACTTCCGCTTG	8.07638	+
GACTTCCGCATA	8.07615	+
TATGCGGAAGTC	8.07615	-
AATAGGGAAGCG	8.07592	-
CGCTTCCCTATT	8.07592	+
AAGGAGGAACTT	8.07491	-
AAGTTCCTCCTT	8.07491	+
AAGTTCCTCACT	8.07307	+
AGTGAGGAACTT	8.07307	-
CACTTCCTCGTC	8.07303	+
GACGAGGAAGTG	8.07303	-
ATTGGGGAAGCG	8.07243	-
CGCTTCCCCAAT	8.07243	+
AAAATGGAAGTG	8.07197	-
CACTTCCATTTT	8.07197	+
AATGGGGAAGAG	8.07194	-
CTCTTCCCCATT	8.07194	+
ACACAGGAAGTG	8.0686	-
CACTTCCTGTGT	8.0686	+
ATAGTGGAAGTG	8.06847	-
CACTTCCACTAT	8.06847	+
AAAGAAGAAGTA	8.06816	-
TACTTCTTCTTT	8.06816	+
TACTTCCCTATA	8.06491	+
TATAGGGAAGTA	8.06491	-
AGATAGGAAGTG	8.06469	-
CACTTCCTATCT	8.06469	+
AATGAGGAAGGG	8.06362	-
CCCTTCCTCATT	8.06362	+
ACAGCGGAAGTG	8.06283	-
CACTTCCGCTGT	8.06283	+
AAAGAAGAAGTT	8.06253	-
AACTTCTTCTTT	8.06253	+
TACTTCCCCAAA	8.06142	+
TTTGGGGAAGTA	8.06142	-
ATAAAGGAAGCG	8.05944	-
CGCTTCCTTTAT	8.05944	+
AACTTCCCTATA	8.05928	+
TATAGGGAAGTT	8.05928	-
AAAAAGGAAGAG	8.05895	-
CTCTTCCTTTTT	8.05895	+
AGAAGGGAACTG	8.05882	-
CAGTTCCCTTCT	8.05882	+
GAAAGGGAAGTC	8.05606	-
GACTTCCCTTTC	8.05606	+
AGGAGGGAAGTG	8.05598	-
CACTTCCCTCCT	8.05598	+
AACTTCCCCAAA	8.05578	+
TTTGGGGAAGTT	8.05578	-
ATAGAGGAAGAG	8.05546	-
CTCTTCCTCTAT	8.05546	+
GACTTCCTCTGA	8.05421	+
TCAGAGGAAGTC	8.05421	-
GACTTCCCCTAC	8.05256	+
GTAGGGGAAGTC	8.05256	-
AAAGGGGAACCG	8.05067	-
CGGTTCCCCTTT	8.05067	+
TACTTCCTTTAA	8.04843	+
TTAAAGGAAGTA	8.04843	-
AAGGGGGAAGCG	8.04783	-
CGCTTCCCCCTT	8.04783	+
CAGTTCCTGATA	8.04733	+
TATCAGGAACTG	8.04733	-
AGTGGGGAAGCG	8.04599	-
CGCTTCCCCACT	8.04599	+
CACTTCCTTAGA	8.04488	+
TCTAAGGAAGTG	8.04488	-
CACTTCCCTAAC	8.04323	+
GTTAGGGAAGTG	8.04323	-
AACTTCCTTTAA	8.0428	+
TTAAAGGAAGTT	8.0428	-
AGAGTGGAAGTG	8.04204	-
CACTTCCACTCT	8.04204	+
CAGTTCCGCATA	8.04156	+
TATGCGGAACTG	8.04156	-
GATGAGGAACTA	8.04136	-
TAGTTCCTCATC	8.04136	+
TAAGGGGAACTA	8.03966	-
TAGTTCCCCTTA	8.03966	+
AATGGGGAAATG	8.03947	-
CATTTCCCCATT	8.03947	+
TACTTCCCCCTA	8.03682	+
TAGGGGGAAGTA	8.03682	-
AATCGGGAAGTC	8.03679	-
GACTTCCCGATT	8.03679	+
AAGTTCCTCATC	8.03573	+
GATGAGGAACTT	8.03573	-
TACTTCCCCACA	8.03498	+
TGTGGGGAAGTA	8.03498	-
AAGTTCCCCTTA	8.03403	+
TAAGGGGAACTT	8.03403	-
AGAAAGGAAGCG	8.03301	-
CGCTTCCTTTCT	8.03301	+
AACTTCCCCCTA	8.03119	+
TAGGGGGAAGTT	8.03119	-
AACTTCCCCACA	8.02935	+
TGTGGGGAAGTT	8.02935	-
AGAGAGGAAGAG	8.02902	-
CTCTTCCTCTCT	8.02902	+
CACTTCCTATTC	8.02735	+
GAATAGGAAGTG	8.02735	-
AAAAAGGAAATG	8.02648	-
CATTTCCTTTTT	8.02648	+
GACTTCCCCTCC	8.02613	+
GGAGGGGAAGTC	8.02613	-
ATAGAGGAAATG	8.02299	-
CATTTCCTCTAT	8.02299	+
CAAGGGGAAGTC	8.02264	-
GACTTCCCCTTG	8.02264	+
TACTTCCTTTCA	8.022	+
TGAAAGGAAGTA	8.022	-
CAGTTCCCTTTC	8.02148	+
GAAAGGGAACTG	8.02148	-
ATACAGGAAGTC	8.02031	-
GACTTCCTGTAT	8.02031	+
CAGTTCCTCTGA	8.01963	+
TCAGAGGAACTG	8.01963	-
CACTTCCCTCTC	8.01864	+
GAGAGGGAAGTG	8.01864	-
AAAACGGAAGTC	8.01803	-
GACTTCCGTTTT	8.01803	+
CAGTTCCCCTAC	8.01798	+
GTAGGGGAACTG	8.01798	-
CACTTCCCTACC	8.0168	+
GGTAGGGAAGTG	8.0168	-
CACTTCCTCCGA	8.01679	+
TCGGAGGAAGTG	8.01679	-
AACTTCCTTTCA	8.01636	+
TGAAAGGAAGTT	8.01636	-
AATGAAGAAGTC	8.01632	-
GACTTCTTCATT	8.01632	+
CACTTCCCCCAC	8.01514	+
GTGGGGGAAGTG	8.01514	-
ATAGCGGAAGTC	8.01454	-
GACTTCCGCTAT	8.01454	+
TAAGAGGAAGCA	8.01385	-
TGCTTCCTCTTA	8.01385	+
CACTTCCCTATG	8.01331	+
CATAGGGAAGTG	8.01331	-
CACTTCCCCAAG	8.00981	+
CTTGGGGAAGTG	8.00981	-
ACAGGGGAAGTC	8.00909	-
GACTTCCCCTGT	8.00909	+
CGCTTCCCCATC	8.00865	+
GATGGGGAAGCG	8.00865	-
AGCTTCCTCTTA	8.00822	+
TAAGAGGAAGCT	8.00822	-
ATTACGGAAGTG	8.0052	-
CACTTCCGTAAT	8.0052	+
CACTTCCACTTC	8.0047	+
GAAGTGGAAGTG	8.0047	-
ATAAGGGAAGTA	8.0033	-
TACTTCCCTTAT	8.0033	+
AATCGGGAACTG	8.0022	-
CAGTTCCCGATT	8.0022	+
ACTAGGGAAGTG	7.99976	-
CACTTCCCTAGT	7.99976	+
AACTTCCCTTAT	7.99767	+
ATAAGGGAAGTT	7.99767	-
CACTTCCTTTAG	7.99683	+
CTAAAGGAAGTG	7.99683	-
GACTTCCTTAAA	7.99659	+
TTTAAGGAAGTC	7.99659	-
AGAGAGGAAATG	7.99655	-
CATTTCCTCTCT	7.99655	+
CGCTTCCTTTTC	7.99566	+
GAAAAGGAAGCG	7.99566	-
AGACAGGAAGTC	7.99387	-
GACTTCCTGTCT	7.99387	+
CGCTTCCTCTAC	7.99217	+
GTAGAGGAAGCG	7.99217	-
CTCTTCCTCTTC	7.99168	+
GAAGAGGAAGAG	7.99168	-
CAGTTCCCCTCC	7.99155	+
GGAGGGGAACTG	7.99155	-
CACTTCCCCCCC	7.98871	+
GGGGGGGAAGTG	7.98871	-
AGAGCGGAAGTC	7.98811	-
GACTTCCGCTCT	7.98811	+
CAAGGGGAACTG	7.98806	-
CAGTTCCCCTTG	7.98806	+
GAGTTCCCCATA	7.98782	+
TATGGGGAACTC	7.98782	-
ATACAGGAACTG	7.98572	-
CAGTTCCTGTAT	7.98572	+
CACTTCCCCCTG	7.98522	+
CAGGGGGAAGTG	7.98522	-
AAAACGGAACTG	7.98345	-
CAGTTCCGTTTT	7.98345	+
CACTTCCCCACG	7.98338	+
CGTGGGGAAGTG	7.98338	-
ATGCAGGAAGTG	7.98288	-
CACTTCCTGCAT	7.98288	+
AATGAAGAACTG	7.98173	-
CAGTTCTTCATT	7.98173	+
AACGAGGAAGTC	7.98126	-
GACTTCCTCGTT	7.98126	+
AAGACGGAAGTG	7.98061	-
CACTTCCGTCTT	7.98061	+
ATAGCGGAACTG	7.97995	-
CAGTTCCGCTAT	7.97995	+
AGTACGGAAGTG	7.97877	-
CACTTCCGTACT	7.97877	+
ATGGCGGAAGTG	7.97712	-
CACTTCCGCCAT	7.97712	+
AGAAGGGAAGTA	7.97687	-
TACTTCCCTTCT	7.97687	+
AATCAGGAAGCG	7.97639	-
CGCTTCCTGATT	7.97639	+
GAGTTCCTTTTA	7.97483	+
TAAAAGGAACTC	7.97483	-
ACAGGGGAACTG	7.9745	-
CAGTTCCCCTGT	7.9745	+
GACTTCCTTCTA	7.97199	+
TAGAAGGAAGTC	7.97199	-
ACGGGGGAAGTG	7.97167	-
CACTTCCCCCGT	7.97167	+
GAGTTCCTCTAA	7.97134	+
TTAGAGGAACTC	7.97134	-
AACTTCCCTTCT	7.97124	+
AGAAGGGAAGTT	7.97124	-
AATGCGGAAGCG	7.97062	-
CGCTTCCGCATT	7.97062	+
CACTTCCTTTCG	7.97039	+
CGAAAGGAAGTG	7.97039	-
GACTTCCTTACA	7.97016	+
TGTAAGGAAGTC	7.97016	-
AAAGGGGAAGCA	7.96872	-
TGCTTCCCCTTT	7.96872	+
GACTTCCTCCAA	7.9685	+
TTGGAGGAAGTC	7.9685	-
CGCTTCCTCTCC	7.96573	+
GGAGAGGAAGCG	7.96573	-
TACTTCCTGATA	7.96538	+
TATCAGGAAGTA	7.96538	-
AAAGGGGAAGCT	7.96309	-
AGCTTCCCCTTT	7.96309	+
CAAGAGGAAGCG	7.96225	-
CGCTTCCTCTTG	7.96225	+
GGCTTCCTCATA	7.96201	+
TATGAGGAAGCC	7.96201	-
CAGTTCCTTAAA	7.962	+
TTTAAGGAACTG	7.962	-
AACTTCCTGATA	7.95975	+
TATCAGGAAGTT	7.95975	-
TACTTCCGCATA	7.95961	+
TATGCGGAAGTA	7.95961	-
AGACAGGAACTG	7.95929	-
CAGTTCCTGTCT	7.95929	+
CATTTCCTCTTC	7.95921	+
GAAGAGGAAATG	7.95921	-
GAACAGGAAGTC	7.95653	-
GACTTCCTGTTC	7.95653	+
AGGCAGGAAGTG	7.95645	-
CACTTCCTGCCT	7.95645	+
AACTTCCGCATA	7.95398	+
TATGCGGAAGTT	7.95398	-
AGAGCGGAACTG	7.95352	-
CAGTTCCGCTCT	7.95352	+
ATTAGGGAAGTC	7.95146	-
GACTTCCCTAAT	7.95146	+
GAAGCGGAAGTC	7.95076	-
GACTTCCGCTTC	7.95076	+
AGGGCGGAAGTG	7.95068	-
CACTTCCGCCCT	7.95068	+
ACAGAGGAAGCG	7.94869	-
CGCTTCCTCTGT	7.94869	+
AACGAGGAACTG	7.94667	-
CAGTTCCTCGTT	7.94667	+
GAGTTCCTCTCA	7.9449	+
TGAGAGGAACTC	7.9449	-
CACTTCCTGAAC	7.9437	+
GTTCAGGAAGTG	7.9437	-
GACTTCCTCCCA	7.94207	+
TGGGAGGAAGTC	7.94207	-
CACTTCCCGTAA	7.942	+
TTACGGGAAGTG	7.942	-
CACTTCCGTATC	7.94143	+
GATACGGAAGTG	7.94143	-
GAAAGGGAAGTA	7.93953	-
TACTTCCCTTTC	7.93953	+
CACTTCTCCATA	7.93802	+
TATGGAGAAGTG	7.93802	-
CACTTCCGCAAC	7.93793	+
GTTGCGGAAGTG	7.93793	-
TACTTCCTCTGA	7.93768	+
TCAGAGGAAGTA	7.93768	-
CAGTTCCTTCTA	7.93741	+
TAGAAGGAACTG	7.93741	-
GTAGGGGAAGTA	7.93603	-
TACTTCCCCTAC	7.93603	+
AAATAGGAAGTC	7.93558	-
GACTTCCTATTT	7.93558	+
CAGTTCCTTACA	7.93557	+
TGTAAGGAACTG	7.93557	-
CAGTTCCTCCAA	7.93391	+
TTGGAGGAACTG	7.93391	-
AACTTCCCTTTC	7.93389	+
GAAAGGGAAGTT	7.93389	-
CACTTCCCCAGC	7.93248	+
GCTGGGGAAGTG	7.93248	-
AACTTCCTCTGA	7.93205	+
TCAGAGGAAGTT	7.93205	-
AACTTCCCCTAC	7.9304	+
GTAGGGGAAGTT	7.9304	-
AAAAGGGAACTC	7.92971	-
GAGTTCCCTTTT	7.92971	+
CGGTTCCTCATA	7.92742	+
TATGAGGAACCG	7.92742	-
AAGAGGGAAGTC	7.92687	-
GACTTCCCTCTT	7.92687	+
ATAGGGGAACTC	7.92621	-
GAGTTCCCCTAT	7.92621	+
CACTTCTTTTTA	7.92503	+
TAAAAAGAAGTG	7.92503	-
AGTAGGGAAGTC	7.92503	-
GACTTCCCTACT	7.92503	+
ATGGGGGAAGTC	7.92337	-
GACTTCCCCCAT	7.92337	+
ATTTAGGAAGTG	7.92275	-
CACTTCCTAAAT	7.92275	+
CAGTTCCTGTTC	7.92194	+
GAACAGGAACTG	7.92194	-
CACTTCTTCTAA	7.92153	+
TTAGAAGAAGTG	7.92153	-
AATCGGGAAGTA	7.92026	-
TACTTCCCGATT	7.92026	+
CACTTCCTTTGC	7.9195	+
GCAAAGGAAGTG	7.9195	-
CACTTCCTGCTC	7.91911	+
GAGCAGGAAGTG	7.91911	-
CACTTCCTGACC	7.91727	+
GGTCAGGAAGTG	7.91727	-
AATGGGGAAGCC	7.91688	-
GGCTTCCCCATT	7.91688	+
ATTAGGGAACTG	7.91688	-
CAGTTCCCTAAT	7.91688	+
CAGTTCCGCTTC	7.91618	+
GAAGCGGAACTG	7.91618	-
CACTTCCCGTCA	7.91557	+
TGACGGGAAGTG	7.91557	-
AACTTCCCGATT	7.91462	+
AATCGGGAAGTT	7.91462	-
CACTTCCTGATG	7.91378	+
CATCAGGAAGTG	7.91378	-
CACTTCCGCCTC	7.91334	+
GAGGCGGAAGTG	7.91334	-
AAAGTGGAAGTC	7.91293	-
GACTTCCACTTT	7.91293	+
CACTTCCGCACC	7.9115	+
GGTGCGGAAGTG	7.9115	-
GGAGGGGAAGTA	7.9096	-
TACTTCCCCTCC	7.9096	+
CACTTCCGCATG	7.90801	+
CATGCGGAAGTG	7.90801	-
CAGTTCCTCCCA	7.90748	+
TGGGAGGAACTG	7.90748	-
CAAGGGGAAGTA	7.90611	-
TACTTCCCCTTG	7.90611	+
AACTTCCCCTCC	7.90396	+
GGAGGGGAAGTT	7.90396	-
AAAAAGGAAGCC	7.9039	-
GGCTTCCTTTTT	7.9039	+
ATACAGGAAGTA	7.90377	-
TACTTCCTGTAT	7.90377	+
AATATGGAAGTG	7.90359	-
CACTTCCATATT	7.90359	+
CACTTCCCCGTA	7.90295	+
TACGGGGAAGTG	7.90295	-
AAAACGGAAGTA	7.9015	-
TACTTCCGTTTT	7.9015	+
AAATAGGAACTG	7.90099	-
CAGTTCCTATTT	7.90099	+
AACTTCCCCTTG	7.90047	+
CAAGGGGAAGTT	7.90047	-
ATAGAGGAAGCC	7.9004	-
GGCTTCCTCTAT	7.9004	+
ACTCAGGAAGTG	7.90022	-
CACTTCCTGAGT	7.90022	+
ATTGTGGAAGTG	7.9001	-
CACTTCCACAAT	7.9001	+
AAAGAGGAAGAC	7.89991	-
GTCTTCCTCTTT	7.89991	+
AATGAAGAAGTA	7.89979	-
TACTTCTTCATT	7.89979	+
AGAGGGGAACTC	7.89978	-
GAGTTCCCCTCT	7.89978	+
AAGTAGGAAGTG	7.89816	-
CACTTCCTACTT	7.89816	+
AACTTCCTGTAT	7.89814	+
ATACAGGAAGTT	7.89814	-
ATAGCGGAAGTA	7.898	-
TACTTCCGCTAT	7.898	+
AGGGGGGAAGTC	7.89694	-
GACTTCCCCCCT	7.89694	+
AGTTAGGAAGTG	7.89632	-
CACTTCCTAACT	7.89632	+
AAAACGGAAGTT	7.89587	-
AACTTCCGTTTT	7.89587	+
CACTTCTTCTCA	7.8951	+
TGAGAAGAAGTG	7.8951	-
ACTGCGGAAGTG	7.89446	-
CACTTCCGCAGT	7.89446	+
AACTTCTTCATT	7.89415	+
AATGAAGAAGTT	7.89415	-
ACAGGGGAAGTA	7.89255	-
TACTTCCCCTGT	7.89255	+
AACTTCCGCTAT	7.89237	+
ATAGCGGAAGTT	7.89237	-
AAGAGGGAACTG	7.89228	-
CAGTTCCCTCTT	7.89228	+
ATTAAGGAAGCG	7.89107	-
CGCTTCCTTAAT	7.89107	+
AATAAGGAAGAG	7.89058	-
CTCTTCCTTATT	7.89058	+
AGTAGGGAACTG	7.89044	-
CAGTTCCCTACT	7.89044	+
ATGGGGGAACTG	7.88879	-
CAGTTCCCCCAT	7.88879	+
GACTTCCCTATC	7.88769	+
GATAGGGAAGTC	7.88769	-
ATTGAGGAAGAG	7.88708	-
CTCTTCCTCAAT	7.88708	+
AACTTCCCCTGT	7.88692	+
ACAGGGGAAGTT	7.88692	-
CACTTCCTCTGG	7.88608	+
CCAGAGGAAGTG	7.88608	-
GACTTCCTCAGA	7.88584	+
TCTGAGGAAGTC	7.88584	-
GACTTCCCCAAC	7.88419	+
GTTGGGGAAGTC	7.88419	-
AATGGGGAACCG	7.8823	-
CGGTTCCCCATT	7.8823	+
TACTTCCTTAAA	7.88005	+
TTTAAGGAAGTA	7.88005	-
AAAAGAGAAGTG	7.8799	-
CACTTCTCTTTT	7.8799	+
AAAGTGGAACTG	7.87834	-
CAGTTCCACTTT	7.87834	+
AGACAGGAAGTA	7.87734	-
TACTTCCTGTCT	7.87734	+
ATAGGAGAAGTG	7.87641	-
CACTTCTCCTAT	7.87641	+
AAGGTGGAAGTG	7.87551	-
CACTTCCACCTT	7.87551	+
AACTTCCTTAAA	7.87442	+
TTTAAGGAAGTT	7.87442	-
AGAGAGGAAGCC	7.87397	-
GGCTTCCTCTCT	7.87397	+
AGTGTGGAAGTG	7.87366	-
CACTTCCACACT	7.87366	+
AACTTCCTGTCT	7.87171	+
AGACAGGAAGTT	7.87171	-
AGAGCGGAAGTA	7.87157	-
TACTTCCGCTCT	7.87157	+
TAGTTCCCCATA	7.87128	+
TATGGGGAACTA	7.87128	-
GACTTCCTTTAC	7.8712	+
GTAAAGGAAGTC	7.8712	-
AAAAAGGAACCG	7.86931	-
CGGTTCCTTTTT	7.86931	+
AAAGAGGAAATC	7.86744	-
GATTTCCTCTTT	7.86744	+
AAGAAGGAAGCG	7.86647	-
CGCTTCCTTCTT	7.86647	+
AACTTCCGCTCT	7.86594	+
AGAGCGGAAGTT	7.86594	-
ATAGAGGAACCG	7.86581	-
CGGTTCCTCTAT	7.86581	+
AAGTTCCCCATA	7.86565	+
TATGGGGAACTT	7.86565	-
AAAGAGGAACAG	7.86532	-
CTGTTCCTCTTT	7.86532	+
AACGAGGAAGTA	7.86472	-
TACTTCCTCGTT	7.86472	+
AGTAAGGAAGCG	7.86463	-
CGCTTCCTTACT	7.86463	+
ATGGAGGAAGCG	7.86298	-
CGCTTCCTCCAT	7.86298	+
AAGGAGGAAGAG	7.86249	-
CTCTTCCTCCTT	7.86249	+
GAAGGGGAACTC	7.86243	-
GAGTTCCCCTTC	7.86243	+
AGGGGGGAACTG	7.86235	-
CAGTTCCCCCCT	7.86235	+
AGTGAGGAAGAG	7.86065	-
CTCTTCCTCACT	7.86065	+
GACTTCCCCCTC	7.8596	+
GAGGGGGAAGTC	7.8596	-
AACGAGGAAGTT	7.85909	-
AACTTCCTCGTT	7.85909	+
CACTTCCTAATC	7.85898	+
GATTAGGAAGTG	7.85898	-
TAAAAGGAACTA	7.8583	-
TAGTTCCTTTTA	7.8583	+
AATAAGGAAATG	7.85811	-
CATTTCCTTATT	7.85811	+
GACTTCCCCACC	7.85776	+
GGTGGGGAAGTC	7.85776	-
CACTTCCCATTA	7.85727	+
TAATGGGAAGTG	7.85727	-
TACTTCCTTCTA	7.85546	+
TAGAAGGAAGTA	7.85546	-
TAGTTCCTCTAA	7.8548	+
TTAGAGGAACTA	7.8548	-
ATTGAGGAAATG	7.85461	-
CATTTCCTCAAT	7.85461	+
CATGGGGAAGTC	7.85427	-
GACTTCCCCATG	7.85427	+
TACTTCCTTACA	7.85362	+
TGTAAGGAAGTA	7.85362	-
CAGTTCCCTATC	7.8531	+
GATAGGGAACTG	7.8531	-
AAGTTCCTTTTA	7.85266	+
TAAAAGGAACTT	7.85266	-
TACTTCCTCCAA	7.85196	+
TTGGAGGAAGTA	7.85196	-
ATTCAGGAAGTC	7.85193	-
GACTTCCTGAAT	7.85193	+
CAGTTCCTCAGA	7.85125	+
TCTGAGGAACTG	7.85125	-
AGAGGAGAAGTG	7.84997	-
CACTTCTCCTCT	7.84997	+
AACTTCCTTCTA	7.84983	+
TAGAAGGAAGTT	7.84983	-
AATACGGAAGTC	7.84966	-
GACTTCCGTATT	7.84966	+
CAGTTCCCCAAC	7.8496	+
GTTGGGGAACTG	7.8496	-
AAGTTCCTCTAA	7.84917	+
TTAGAGGAACTT	7.84917	-
AACTTCCTTACA	7.84799	+
TGTAAGGAAGTT	7.84799	-
AACTTCCTCCAA	7.84633	+
TTGGAGGAAGTT	7.84633	-
ATTGCGGAAGTC	7.84616	-
GACTTCCGCAAT	7.84616	+
TATGAGGAAGCA	7.84547	-
TGCTTCCTCATA	7.84547	+
GACTTCCTTTCC	7.84477	+
GGAAAGGAAGTC	7.84477	-
CAAAAGGAAGTC	7.84128	-
GACTTCCTTTTG	7.84128	+
ACTGGGGAAGTC	7.84071	-
GACTTCCCCAGT	7.84071	+
CACTTCCGGTTA	7.8402	+
TAACCGGAAGTG	7.8402	-
GAACAGGAAGTA	7.84	-
TACTTCCTGTTC	7.84	+
AGCTTCCTCATA	7.83984	+
TATGAGGAAGCT	7.83984	-
AGAGAGGAACCG	7.83938	-
CGGTTCCTCTCT	7.83938	+
CTAGAGGAAGTC	7.83778	-
GACTTCCTCTAG	7.83778	+
GAAGAGGAAGCC	7.83662	-
GGCTTCCTCTTC	7.83662	+
CAGTTCCTTTAC	7.83662	+
GTAAAGGAACTG	7.83662	-
AGGGAGGAAGCG	7.83654	-
CGCTTCCTCCCT	7.83654	+
CACTTCCACATC	7.83632	+
GATGTGGAAGTG	7.83632	-
ATTAGGGAAGTA	7.83493	-
TACTTCCCTAAT	7.83493	+
AACTTCCTGTTC	7.83436	+
GAACAGGAAGTT	7.83436	-
GAAGCGGAAGTA	7.83423	-
TACTTCCGCTTC	7.83423	+
CACTTCCTTCAC	7.83378	+
GTGAAGGAAGTG	7.83378	-
AAACAGGAACTC	7.83017	-
GAGTTCCTGTTT	7.83017	+
AAGGAGGAAATG	7.83002	-
CATTTCCTCCTT	7.83002	+
AACTTCCCTAAT	7.82929	+
ATTAGGGAAGTT	7.82929	-
AACTTCCGCTTC	7.82859	+
GAAGCGGAAGTT	7.82859	-
CACTTCCTTAAG	7.82845	+
CTTAAGGAAGTG	7.82845	-
TAGTTCCTCTCA	7.82837	+
TGAGAGGAACTA	7.82837	-
AGTGAGGAAATG	7.82818	-
CATTTCCTCACT	7.82818	+
ACAAAGGAAGTC	7.82773	-
GACTTCCTTTGT	7.82773	+
AAGCAGGAAGTC	7.82734	-
GACTTCCTGCTT	7.82734	+
CGCTTCCTTATC	7.82729	+
GATAAGGAAGCG	7.82729	-
CGCTTCCCTTTA	7.82559	+
TAAAGGGAAGCG	7.82559	-
TACTTCCTCCCA	7.82553	+
TGGGAGGAAGTA	7.82553	-
AGTCAGGAAGTC	7.8255	-
GACTTCCTGACT	7.8255	+
CAGTTCCCCCTC	7.82501	+
GAGGGGGAACTG	7.82501	-
AAAGCGGAACTC	7.82441	-
GAGTTCCGCTTT	7.82441	+
CGCTTCCTCAAC	7.82379	+
GTTGAGGAAGCG	7.82379	-
CTCTTCCTCATC	7.8233	+
GATGAGGAAGAG	7.8233	-
CAGTTCCCCACC	7.82317	+
GGTGGGGAACTG	7.82317	-
AAGTTCCTCTCA	7.82273	+
TGAGAGGAACTT	7.82273	-
CGCTTCCCCTAA	7.82209	+
TTAGGGGAAGCG	7.82209	-
CTCTTCCCCTTA	7.8216	+
TAAGGGGAAGAG	7.8216	-
AAGGCGGAAGTC	7.82157	-
GACTTCCGCCTT	7.82157	+
AACTTCCTCCCA	7.8199	+
TGGGAGGAAGTT	7.8199	-
AGTGCGGAAGTC	7.81973	-
GACTTCCGCACT	7.81973	+
CAGTTCCCCATG	7.81968	+
CATGGGGAACTG	7.81968	-
AAATAGGAAGTA	7.81905	-
TACTTCCTATTT	7.81905	+
ATTCAGGAACTG	7.81734	-
CAGTTCCTGAAT	7.81734	+
AATACGGAACTG	7.81507	-
CAGTTCCGTATT	7.81507	+
AAATAGGAAGTT	7.81341	-
AACTTCCTATTT	7.81341	+
CCCTTCCTCTTA	7.81328	+
TAAGAGGAAGGG	7.81328	-
AAAAGGGAACTA	7.81317	-
TAGTTCCCTTTT	7.81317	+
CACTTCTCCTTC	7.81263	+
GAAGGAGAAGTG	7.81263	-
ATTGCGGAACTG	7.81158	-
CAGTTCCGCAAT	7.81158	+
CGAGAGGAAGTC	7.81135	-
GACTTCCTCTCG	7.81135	+
AAGAGGGAAGTA	7.81034	-
TACTTCCCTCTT	7.81034	+
CAGTTCCTTTCC	7.81018	+
GGAAAGGAACTG	7.81018	-
ATAGGGGAACTA	7.80968	-
TAGTTCCCCTAT	7.80968	+
AGTAGGGAAGTA	7.80849	-
TACTTCCCTACT	7.80849	+
AAAAGGGAACTT	7.80754	-
AAGTTCCCTTTT	7.80754	+
CACTTCCTTCCC	7.80735	+
GGGAAGGAAGTG	7.80735	-
ATGGGGGAAGTA	7.80684	-
TACTTCCCCCAT	7.80684	+
CAAAAGGAACTG	7.80669	-
CAGTTCCTTTTG	7.80669	+
GAGTTCCTTATA	7.80646	+
TATAAGGAACTC	7.80646	-
ACTGGGGAACTG	7.80613	-
CAGTTCCCCAGT	7.80613	+
AACTTCCCTCTT	7.8047	+
AAGAGGGAAGTT	7.8047	-
AAGTTCCCCTAT	7.80404	+
ATAGGGGAACTT	7.80404	-
CACTTCCTTCTG	7.80386	+
CAGAAGGAAGTG	7.80386	-
CAGTTCCTCTAG	7.8032	+
CTAGAGGAACTG	7.8032	-
GAGTTCCTCAAA	7.80296	+
TTTGAGGAACTC	7.80296	-
AACTTCCCTACT	7.80286	+
AGTAGGGAAGTT	7.80286	-
CGGTTCCTCTTC	7.80204	+
GAAGAGGAACCG	7.80204	-
CACTTCCTTACG	7.80202	+
CGTAAGGAAGTG	7.80202	-
AACTTCCCCCAT	7.80121	+
ATGGGGGAAGTT	7.80121	-
CACTTCCTCCAG	7.80036	+
CTGGAGGAAGTG	7.80036	-
AATGGGGAAGCA	7.80035	-
TGCTTCCCCATT	7.80035	+
CGCTTCCTCCTC	7.7992	+
GAGGAGGAAGCG	7.7992	-
CGCTTCCTCACC	7.79736	+
GGTGAGGAAGCG	7.79736	-
AAAGTGGAAGTA	7.79639	-
TACTTCCACTTT	7.79639	+
CGCTTCCCCTCA	7.79566	+
TGAGGGGAAGCG	7.79566	-
AATGGGGAAGCT	7.79471	-
AGCTTCCCCATT	7.79471	+
CATGAGGAAGCG	7.79387	-
CGCTTCCTCATG	7.79387	+
ACAAAGGAACTG	7.79314	-
CAGTTCCTTTGT	7.79314	+
AAGCAGGAACTG	7.79275	-
CAGTTCCTGCTT	7.79275	+
AGTCAGGAACTG	7.79091	-
CAGTTCCTGACT	7.79091	+
CATTTCCTCATC	7.79083	+
GATGAGGAAATG	7.79083	-
AAAGTGGAAGTT	7.79076	-
AACTTCCACTTT	7.79076	+
ACGAAGGAAGTG	7.7903	-
CACTTCCTTCGT	7.7903	+
CATTTCCCCTTA	7.78913	+
TAAGGGGAAATG	7.78913	-
GACTTCCTGATC	7.78815	+
GATCAGGAAGTC	7.78815	-
AAAAAGGAAGCA	7.78736	-
TGCTTCCTTTTT	7.78736	+
AAGGCGGAACTG	7.78698	-
CAGTTCCGCCTT	7.78698	+
GACTTCCCGTTA	7.78645	+
TAACGGGAAGTC	7.78645	-
AGTGCGGAACTG	7.78514	-
CAGTTCCGCACT	7.78514	+
ATAGAGGAAGCA	7.78386	-
TGCTTCCTCTAT	7.78386	+
AAAGAGGAAGAA	7.78338	-
TTCTTCCTCTTT	7.78338	+
AGAGGGGAACTA	7.78324	-
TAGTTCCCCTCT	7.78324	+
GACTTCCGCATC	7.78239	+
GATGCGGAAGTC	7.78239	-
AAAAAGGAAGCT	7.78173	-
AGCTTCCTTTTT	7.78173	+
AGGGGGGAAGTA	7.78041	-
TACTTCCCCCCT	7.78041	+
AAACAAGAAGTG	7.78037	-
CACTTCTTGTTT	7.78037	+
ACTGAGGAAGCG	7.78032	-
CGCTTCCTCAGT	7.78032	+
GAGTTCCTCCTA	7.77837	+
TAGGAGGAACTC	7.77837	-
AGCTTCCTCTAT	7.77823	+
ATAGAGGAAGCT	7.77823	-
AAAGAGGAAGAT	7.77774	-
ATCTTCCTCTTT	7.77774	+
AAGTTCCCCTCT	7.77761	+
AGAGGGGAACTT	7.77761	-
CAGTTCCTCTCG	7.77676	+
CGAGAGGAACTG	7.77676	-
GAGTTCCTCACA	7.77653	+
TGTGAGGAACTC	7.77653	-
AACTTCCCCCCT	7.77477	+
AGGGGGGAAGTT	7.77477	-
AAAGCAGAAGTG	7.7746	-
CACTTCTGCTTT	7.7746	+
CACTTCCTCCCG	7.77393	+
CGGGAGGAAGTG	7.77393	-
CACTTCCCGAAA	7.77362	+
TTTCGGGAAGTG	7.77362	-
GATAGGGAAGTA	7.77115	-
TACTTCCCTATC	7.77115	+
TACTTCCTCAGA	7.76931	+
TCTGAGGAAGTA	7.76931	-
AAAGGGGAAGGG	7.76816	-
CCCTTCCCCTTT	7.76816	+
GTTGGGGAAGTA	7.76766	-
TACTTCCCCAAC	7.76766	+
AATTAGGAAGTC	7.7672	-
GACTTCCTAATT	7.7672	+
GACTTCTTCTTA	7.76599	+
TAAGAAGAAGTC	7.76599	-
AACTTCCCTATC	7.76552	+
GATAGGGAAGTT	7.76552	-
AACTTCCTCAGA	7.76367	+
TCTGAGGAAGTT	7.76367	-
AACTTCCCCAAC	7.76202	+
GTTGGGGAAGTT	7.76202	-
AATAGGGAACTC	7.76133	-
GAGTTCCCTATT	7.76133	+
GACTTCCTCTGC	7.76045	+
GCAGAGGAAGTC	7.76045	-
ATTGGGGAACTC	7.75783	-
GAGTTCCCCAAT	7.75783	+
AGAGAGGAAGCA	7.75743	-
TGCTTCCTCTCT	7.75743	+
CACTTCTTTATA	7.75665	+
TATAAAGAAGTG	7.75665	-
CACTTCCGTTAA	7.75487	+
TTAACGGAAGTG	7.75487	-
GTAAAGGAAGTA	7.75467	-
TACTTCCTTTAC	7.75467	+
CAGTTCCTGATC	7.75357	+
GATCAGGAACTG	7.75357	-
CACTTCTTCAAA	7.75316	+
TTTGAAGAAGTG	7.75316	-
CAGTTCCCGTTA	7.75187	+
TAACGGGAACTG	7.75187	-
AGAGAGGAAGCT	7.7518	-
AGCTTCCTCTCT	7.7518	+
CACTTCCTTAGC	7.75112	+
GCTAAGGAAGTG	7.75112	-
AAAGAGGAAATA	7.75091	-
TATTTCCTCTTT	7.75091	+
CACTTCCCTTGA	7.74942	+
TCAAGGGAAGTG	7.74942	-
AACTTCCTTTAC	7.74904	+
GTAAAGGAAGTT	7.74904	-
CACTTCCCGCTA	7.74903	+
TAGCGGGAAGTG	7.74903	-
CAGTTCCGCATC	7.7478	+
GATGCGGAACTG	7.7478	-
CACTTCCCGACA	7.74719	+
TGTCGGGAAGTG	7.74719	-
GAAGGGGAACTA	7.7459	-
TAGTTCCCCTTC	7.7459	+
AAAGAGGAAATT	7.74527	-
AATTTCCTCTTT	7.74527	+
ATAAAGGAACTC	7.74485	-
GAGTTCCTTTAT	7.74485	+
AATGTGGAAGTC	7.74455	-
GACTTCCACATT	7.74455	+
GAGGGGGAAGTA	7.74306	-
TACTTCCCCCTC	7.74306	+
ATGAAGGAAGTC	7.74201	-
GACTTCCTTCAT	7.74201	+
GGTGGGGAAGTA	7.74122	-
TACTTCCCCACC	7.74122	+
AAGTTCCCCTTC	7.74026	+
GAAGGGGAACTT	7.74026	-
CATGGGGAAGTA	7.73773	-
TACTTCCCCATG	7.73773	+
AACTTCCCCCTC	7.73743	+
GAGGGGGAAGTT	7.73743	-
AACTTCCCCACC	7.73559	+
GGTGGGGAAGTT	7.73559	-
AATAAGGAAGCC	7.73552	-
GGCTTCCTTATT	7.73552	+
ATTCAGGAAGTA	7.7354	-
TACTTCCTGAAT	7.7354	+
AAGGGGGAACTC	7.73324	-
GAGTTCCCCCTT	7.73324	+
AATACGGAAGTA	7.73313	-
TACTTCCGTATT	7.73313	+
[truncated: 4,690 more rows]

## Sheet: Legend
	Table S1: PWM scoring of PU.1 occupancy sites
	DN1-2b PWM: PWM and scores of individual motifs derived from occupancy sites in DN1, DN2a, and DN2b cells; Mac PWM: PWM and scores of individual motifs derived from occupancy sites in macrophages.
