# Supplementary material for: Pioneering, chromatin remodeling, and epigenetic constraint in early T-cell gene regulation by SPI1 (PU.1)
Source: HighWire-hosted journal article supplement (doi:10.1101/gr.231423.117), 2018-08-31
Supplement: Supplemental_Table_S2.xlsx [file Supplemental_Table_S2.xlsx]

## Sheet: Fig3_PU1ert2_DEG_24h_0.05_rpkm
Table S2 Differentially expressed genes in Scid.adh.2c2 PU1ert2 24h after 4-hydroxytamoxifen induction (vs PU1ert2 0h) (Fig. 4D)
GeneID	Gene	TranscriptID	chr	start	end	strand	Length	Copies	Annotation.Divergence	PU1ert2_0h.vs..PU1ert2_2h.Log2.Fold.Change	PU1ert2_0h.vs..PU1ert2_2h.p.value	PU1ert2_0h.vs..PU1ert2_2h.adj..p.value	PU1ert2_0h.vs..PU1ert2_8h.Log2.Fold.Change	PU1ert2_0h.vs..PU1ert2_8h.p.value	PU1ert2_0h.vs..PU1ert2_8h.adj..p.value	PU1ert2_0h.vs..PU1ert2_24h.Log2.Fold.Change	PU1ert2_0h.vs..PU1ert2_24h.p.value.y	PU1ert2_0h.vs..PU1ert2_24h.adj..p.value.y	PU1ert2_0h.vs..ert2_0h.Log2.Fold.Change	PU1ert2_0h.vs..ert2_0h.p.value	PU1ert2_0h.vs..ert2_0h.adj..p.value	PU1ert2_0h.vs..ert2_24h.Log2.Fold.Change	PU1ert2_0h.vs..ert2_24h.p.value	PU1ert2_0h.vs..ert2_24h.adj..p.value	Scid.adh.2c2 ert2.0h rpkm (mean of two)	Scid.adh.2c2 ert2.24h rpkm (mean of two)	Scid.adh.2c2 PU.1ert2.0h rpkm (mean of two)	Scid.adh.2c2.PU.1ert2.2h rpkm (mean of two)	Scid.adh.2c2.PU.1ert2.8h rpkm (mean of two)	Scid.adh.2c2 PU.1ert2.24h rpkm (mean of two)
18952	Sept4	NM_001284398	chr11	87391891	87404041	+	1327	1	Sept4|ARTS|Bh5|OTTMUSG00000001265|Pnutl2|-|11|11 C|protein-coding	-0.386619	0.808047	1	-0.976676	0.344515	1	1.79254	0.0028072	0.0112677	-0.0616734	1	1	-0.383151	0.640324	1	0.08	0.064	0.08	0.062	0.038	0.329
53860	Sept9	NM_001113487	chr11	117127560	117223639	+	3783	1	Sept9|MSF1|Msf|PNUTL4|Sint1|-|11 E2|11 82.61 cM|protein-coding	-0.0807813	0.622416	1	-0.986594	0.000170178	0.00321467	-1.02918	4.31e-09	4.4e-08	0.0235176	0.881468	1	-0.0246494	0.878923	1	88.216	83.763	83.775	83.268	43.105	48.884
71661	0610005C13Rik	NR_038166	chr7	52823165	52830546	-	1117	1	0610005C13Rik|AI182092|-|-|ncRNA	0.157091	1	1	1.162	0.235272	0.851312	1.87896	0.0114407	0.0401394	0.805573	0.382717	1	-0.253299	1	1	0.116	0.054	0.063	0.074	0.148	0.277
66838	0610009L18Rik	NR_038126	chr11	120209992	120212504	+	617	1	0610009L18Rik|-|-|11|11|ncRNA	-0.82341	0.270189	1	1.94863	0.000185677	0.00346929	1.44612	0.000627085	0.00288107	-0.814003	0.192854	1	-1.4676	0.0208501	0.846493	0.248	0.157	0.419	0.24	1.529	1.345
68347	0610011F06Rik	NM_026686	chr17	26012445	26014108	+	803	1	0610011F06Rik|-|-|17|17 A3.3|protein-coding	-0.184858	0.325474	1	-0.144466	0.607405	1	-1.0897	7.93e-08	6.96e-07	-0.172292	0.354679	1	-0.182176	0.342098	1	26.14	25.845	27.929	25.863	23.893	15.429
66117	1110001J03Rik	NM_025363	chr6	38484861	38489449	+	437	1	1110001J03Rik|Fmc1|-|6|6 B1|protein-coding	-0.358376	0.204546	1	0.245519	0.58301	1	-1.4978	3.68e-07	2.94e-06	-0.610318	0.0264068	1	-0.520284	0.0626326	1	36.968	38.037	52.692	42.933	53.559	22.333
68001	1110004E09Rik	NM_026502	chr16	90926056	90935094	-	1154	1	1110004E09Rik|-|-|16|16 C3.3|protein-coding	-0.0789996	0.635635	1	-0.321229	0.253289	0.883763	-1.34624	1.22e-14	2.13e-13	-0.146159	0.369542	1	-0.109275	0.506909	1	31.73	32.179	33.429	32.858	24.668	15.379
228356	1110051M20Rik	NM_175123	chr2	91117985	91284799	-	1968	1	1110051M20Rik|AI586322|-|2|2 E1|protein-coding	0.493246	0.289536	1	-0.00383386	1	1	2.09086	1.34e-08	1.29e-07	0.177984	0.72148	1	0.0682389	0.895549	1	0.161	0.147	0.137	0.201	0.13	0.686
66206	1110059E24Rik	NM_025423	chr19	21671803	21727281	-	1422	1	1110059E24Rik|-|-|19|19 C1|protein-coding	-0.218844	0.281478	1	-0.0114669	0.974788	1	-1.07124	4.53e-07	3.57e-06	-0.491721	0.0141721	0.855243	-0.433613	0.0357223	1	15.878	16.634	21.07	18.779	19.176	11.857
100043489	1300002E11Rik	NR_037957	chr16	21794420	21806198	+	3592	1	1300002E11Rik|1500026P21Rik|-|16|16 B1|ncRNA	-0.211107	0.242578	1	-0.517223	0.059752	0.35513	-1.03531	9.5e-08	8.27e-07	0.207313	0.240937	1	0.0693885	0.709469	1	14.783	13.856	13.06	9.866	8.869	5.914
69784	1500009L16Rik	NM_001145198	chr10	83185610	83225507	+	1186	1	1500009L16Rik|2700050C19Rik|OCC-1|-|10|10 C1|protein-coding	-0.350038	0.13141	1	-1.05203	0.00495427	0.0539807	-3.11988	6.48e-24	2.06e-22	-0.269602	0.227789	1	-0.330583	0.158432	1	3.542	3.321	4.053	3.314	1.806	0.545
69770	1600002K03Rik	NM_027207	chr10	79635689	79637864	+	646	1	1600002K03Rik|-|-|10|10 C1|protein-coding	-0.147405	0.500299	1	0.196974	0.604073	1	-1.0335	4.9e-05	0.000277795	-0.29597	0.174998	1	0.0135066	0.968981	1	5.282	6.489	6.168	5.829	6.374	3.527
69781	1600010M07Rik	NR_037959	chr7	117141891	117150160	-	613	1	1600010M07Rik|-|-|7|7|ncRNA	2.4758	1	1	2.52749	1	1	5.85379	0.000343371	0.00165971	0	1	1	0	1	1	0	0	0	0.027	0.021	0.321
75462	1700001C19Rik	NM_001172091	chr17	47549683	47551660	-	1336	1	1700001C19Rik|-|-|17|17 C|protein-coding	3.3297	0.534722	1	6.88233	4.59e-07	1.51e-05	8.82942	2.38e-24	7.72e-23	2.30363	1	1	3.19107	0.528152	1	0.009	0.018	0	0.025	0.267	1.179
69338	1700003D09Rik	NR_045477	chr11	98212032	98219597	-	1386	1	1700003D09Rik|-|-|11|11|ncRNA	5.13e-15	1	1	6.64993	4.33e-06	0.000117077	9.47621	8.48e-35	4.45e-33	3.67632	0.277459	1	0	1	1	0.025	0	0	0	0.212	1.776
66931	1700010I14Rik	NM_025851	chr17	9181198	9201184	+	1866	1	1700010I14Rik|-|-|17|17 A1|protein-coding	-0.0823093	1	1	1.36992	0.0416624	0.27485	1.9812	0.000551794	0.00255862	-1.01112	0.341925	1	-1.26531	0.215768	1	0.032	0.026	0.063	0.062	0.164	0.294
75514	1700013H16Rik	NM_001200013	chrX	51046078	51061008	-	1213	1	1700013H16Rik|Slx2|Xlr6|-|X|X A5|protein-coding	0.366676	1	1	6.37556	3.63e-13	3.03e-11	9.47059	3.14e-75	5.59e-73	-2.36151	1	1	-2.34079	1	1	0	0	0.01	0.014	0.914	9.993
74211	1700017B05Rik	NM_028820	chr9	57100129	57110406	-	4929	1	1700017B05Rik|AA682102|D9Ertd278e|-|9 30.89 cM|9 C|protein-coding	-0.622818	0.000730798	0.0341897	-1.79505	9.93e-11	5.91e-09	-1.90309	3.36e-22	9.79e-21	0.123516	0.463996	1	0.0389948	0.820221	1	23.449	21.7	20.868	14.191	6.106	6.408
75541	1700019G17Rik	NM_029331	chr6	85849044	85854932	-	3068	1	1700019G17Rik|-|-|6|6 C3|protein-coding	1.04425	0.0211465	0.455654	0.955629	0.0831636	0.446124	2.81068	8.77e-15	1.56e-13	-0.116767	1	1	0.0670011	0.898702	1	0.077	0.083	0.08	0.172	0.154	0.66
67851	1700021F05Rik	NM_026411	chr10	43244927	43260800	-	892	1	1700021F05Rik|-|-|10|10 B2|protein-coding	-0.289312	0.0760781	0.974289	-0.427155	0.0811582	0.438072	-1.31208	7.2e-14	1.19e-12	-0.0961498	0.565077	1	0.033664	0.858621	1	18.414	20.179	18.83	16.056	13.877	8.829
242594	1700024P16Rik	NR_104376	chr4	104586061	104689468	+	3154	1	1700024P16Rik|C1orf168|Gm620|-|4|4 C6|protein-coding	-0.503419	0.00172892	0.067274	-2.26127	4.52e-18	6.29e-16	-1.95902	4.27e-25	1.44e-23	-0.53525	0.000828847	0.121913	-0.915178	1.18e-07	6.31e-05	4.746	3.651	6.585	4.835	1.376	1.994
69399	1700025G04Rik	NM_197990	chr1	153731654	153937450	-	9746	1	1700025G04Rik|2610510E02Rik|2900042O04Rik|ENSMUSG00000073540|-|1|1 G2|protein-coding	-0.119279	0.471216	1	-0.78499	0.00234794	0.0293151	-1.54898	6.28e-19	1.5e-17	0.251324	0.117317	1	0.218532	0.185508	1	9.93	9.464	8.06	7.678	4.687	3.176
69479	1700029J07Rik	NM_001033148	chr8	47038960	47060606	-	2731	1	1700029J07Rik|-|-|8|8 B1.1|protein-coding	0.244618	0.463137	1	0.249648	0.527552	1	1.17817	9.06e-06	5.86e-05	0.364084	0.282938	1	0.165446	0.574631	1	0.431	0.367	0.323	0.391	0.35	0.85
69528	1700030J22Rik	NM_027103	chr8	119493499	119502843	-	2966	1	1700030J22Rik|-|-|8|8 E1|protein-coding	-0.223277	0.716186	1	1.24128	0.00740501	0.0751264	1.977	1.12e-08	1.09e-07	0.0353397	1	1	0.111887	0.837373	1	0.139	0.143	0.131	0.116	0.314	0.597
73321	1700042O10Rik	NR_045178	chr11	11768126	11785324	+	1071	1	1700042O10Rik|-|-|11|11|ncRNA	0.0669338	0.906957	1	-1.21604	0.0387087	0.261322	-2.48999	0.000238657	0.00118771	-0.211134	0.641598	1	0.196623	0.697303	1	0.297	0.372	0.329	0.353	0.143	0.066
73431	1700052K11Rik	NR_027956	chr11	105040335	105042747	-	2412	1	1700052K11Rik|AI840954|-|11|11 E1|ncRNA	-0.22639	0.451482	1	0.468964	0.176576	0.726112	1.03626	2.91e-05	0.000171885	-0.284521	0.36641	1	-0.815066	0.00681377	0.419795	0.429	0.295	0.502	0.443	0.698	1.195
73449	1700066B19Rik	NM_001033168	chr18	35886643	35890523	+	2500	1	1700066B19Rik|-|-|18|18 B2|protein-coding	-0.515653	0.111619	1	-0.671798	0.114405	0.546013	-2.25757	1.16e-08	1.13e-07	-0.0668205	0.863624	1	-0.0326559	1	1	0.419	0.416	0.423	0.309	0.25	0.101
112418	1700102P08Rik	NM_053216	chr9	108295165	108300098	+	1092	1	1700102P08Rik|AI593206|-|9|9 F2|protein-coding	0.403442	0.639271	1	0.548162	0.36021	1	1.23284	0.0092645	0.0331523	0.0323696	1	1	0.0942281	0.87734	1	0.194	0.199	0.183	0.256	0.269	0.502
76633	1700112E06Rik	NM_028275	chr14	22838934	23875310	+	902	1	1700112E06Rik|2700009F18Rik|-|14|14 B|protein-coding	-0.203929	0.348742	1	0.535442	0.0590856	0.352301	1.0855	1.75e-07	1.47e-06	-0.267099	0.221621	1	-0.150107	0.501033	1	4.2	4.473	4.808	4.375	6.84	11.958
68246	1700112J05Rik	NR_077218	chr5	77435467	77447888	-	796	1	1700112J05Rik|1700110A09Rik|-|5 C3|5|ncRNA	1.21345	0.117813	1	0.720185	0.341495	1	1.65198	0.0143209	0.0489889	0.105062	1	1	1.15907	0.105831	1	0.133	0.273	0.118	0.289	0.192	0.442
100503636	1700123M08Rik	NR_040577	chr4	11893721	11921442	+	1061	1	1700123M08Rik|1600025K15Rik|-|4|4 A1|ncRNA	0.0503801	0.868422	1	0.113092	0.821144	1	-1.43839	0.00047845	0.00224275	-0.0341066	1	1	-0.00831457	1	1	0.665	0.672	0.654	0.697	0.649	0.278
69069	1810011H11Rik	NM_001163616	chr14	33599149	33631154	+	1466	1	1810011H11Rik|4733401I05Rik|-|14|14 B|protein-coding	-1.17895	0.00662661	0.194329	-4.80553	1.9e-12	1.41e-10	-6.10043	3.06e-17	6.48e-16	-2.10559	2.26e-06	0.000921797	-2.17742	2.6e-06	0.00086974	0.305	0.28	1.235	0.594	0.043	0.019
69120	1810021B22Rik	NR_040417	chr15	88901628	88906284	-	650	1	1810021B22Rik|-|-|15|15|ncRNA	-0.128306	0.905327	1	1.88573	0.000882249	0.0130072	1.36235	0.00271796	0.0109278	-1.69968	0.0286274	1	-0.679503	0.266301	1	0.127	0.26	0.398	0.405	1.392	1.212
72301	1810041L15Rik	NM_001163145	chr15	84209633	84277527	-	5910	1	1810041L15Rik|Kiaa1644|-|15|15 E2|protein-coding	5.13e-15	1	1	2.30936	1	1	6.94127	4.13e-08	3.75e-07	0	1	1	0	1	1	0	0	0	0	0.002	0.071
75602	1810062O18Rik	NR_033571	chr14	21365515	21389902	+	745	1	1810062O18Rik|-|-|14|14 A2|ncRNA	0.435231	0.189849	1	0.884113	0.0253258	0.190489	2.5444	9.05e-21	2.41e-19	-0.532502	0.131039	1	-0.384187	0.422626	1	0.695	0.827	0.962	1.346	1.814	6.588
69864	1810065E05Rik	NM_027239	chr11	58234613	58239525	+	917	1	1810065E05Rik|AV047390|-|11|11 B1.3|protein-coding	-0.682568	0.0536308	0.793149	-3.15954	5.33e-07	1.74e-05	-4.83844	4.56e-15	8.23e-14	-0.582793	0.0925025	1	-0.397927	0.325507	1	0.847	0.909	1.205	0.789	0.125	0.046
69206	2010016I18Rik	NR_033207	chr3	106284904	106288831	-	1556	1	2010016I18Rik|-|-|3|3 F2.3|ncRNA	-0.343672	0.179137	1	-1.38239	6.98e-05	0.0014577	-1.3006	2.77e-06	1.94e-05	-0.261177	0.395471	1	-0.296121	0.347457	1	1.081	1.002	1.246	1.014	0.475	0.587
67038	2010109I03Rik	NM_025929	chr15	74708766	74712134	-	1882	1	2010109I03Rik|-|-|15|15 D3|protein-coding	0.100467	0.726715	1	-0.624886	0.106085	0.521553	1.61873	2.32e-12	3.4e-11	-0.145591	0.613878	1	-0.235507	0.386704	1	0.75	0.693	0.799	0.882	0.488	2.847
72061	2010111I01Rik	NM_001289926	chr13	63066253	63404185	+	6747	1	2010111I01Rik|2300006M17Rik|AP-O|Aopep|mir-23b|mir-24-1|mir-27b|-|13|13 B3|protein-coding	-0.267651	0.159751	1	-0.567735	0.055458	0.337257	-1.35026	3.37e-11	4.41e-10	-0.177365	0.336226	1	-0.203519	0.281878	1	4.43	4.379	4.876	4.191	2.916	1.694
68355	2010204K13Rik	NR_027924	chrX	6988943	7000114	-	824	1	2010204K13Rik|0610010M13Rik|Cip7|-|X|X A1.1|ncRNA	-0.143374	0.477819	1	-0.511112	0.136447	0.614101	-2.01748	8.18e-12	1.14e-10	-0.105956	0.598059	1	-0.0477266	0.827279	1	16.584	16.541	16.954	15.662	10.697	5.013
72097	2010300C02Rik	NM_028096	chr1	37668521	37776656	-	4349	1	2010300C02Rik|-|-|1|1 B|protein-coding	-0.758471	0.0329871	0.600031	-2.42183	2.23e-06	6.41e-05	-2.79229	1.13e-09	1.24e-08	-0.409146	0.225814	1	0.0920405	0.828672	1	0.154	0.194	0.197	0.121	0.035	0.032
69548	2310015A10Rik	NR_033514	chr12	81221533	81233831	-	4842	1	2310015A10Rik|5330419I17Rik|-|12|12|ncRNA	-0.190694	0.62471	1	0.38568	0.354032	1	1.89441	3.01e-12	4.36e-11	-0.0276754	1	1	-0.471419	0.231714	1	0.151	0.107	0.148	0.136	0.192	0.639
73667	2410004P03Rik	NM_001201332	chr12	17011764	17018533	-	1791	1	2410004P03Rik|-|-|12|12 A1.1|protein-coding	-1.51755	0.0836482	1	-1.83577	0.0259843	0.194232	-2.7999	0.0041414	0.016024	-0.140098	1	1	0.39261	0.544641	1	0.099	0.142	0.105	0.037	0.028	0.016
71952	2410016O06Rik	NM_023633	chr12	85291558	85293903	+	2343	1	2410016O06Rik|MAPJD|NO66|-|12|12 D3|protein-coding	-0.385558	0.0161759	0.378755	-0.715405	0.00467724	0.0515019	-1.06159	2.15e-11	2.86e-10	-0.0297233	0.850642	1	0.0684025	0.675191	1	25.606	26.501	25.048	20.092	14.587	13.979
69732	2410018L13Rik	NR_015504	chr12	22990697	23046943	+	1403	1	2410018L13Rik|2810480C08Rik|-|12|12 A1.3|ncRNA	-0.297852	0.235116	1	-0.467779	0.134952	0.609084	-1.11125	9.27e-05	0.000499804	0.19916	0.384043	1	0.00680695	1	1	1.946	1.696	1.634	1.371	1.154	0.872
72190	2510009E07Rik	NM_001001881	chr16	21649118	21694738	-	5160	1	2510009E07Rik|AI194952|-|16|16 B1|protein-coding	-0.800726	1.94e-05	0.00157167	-2.32887	1.37e-15	1.48e-13	-2.62074	1.74e-29	7.2e-28	0.591175	0.000527206	0.0880397	0.489709	0.00690383	0.420295	3.635	3.383	2.33	1.367	0.464	0.436
67028	2610002M06Rik	NM_025921	chrX	104978091	105011673	-	5831	1	2610002M06Rik|8430408J07Rik|AI876413|Chmp1b2|-|X|X D|protein-coding	-0.0459559	0.771451	1	-0.395094	0.0978955	0.497223	-1.03553	3.04e-10	3.54e-09	0.0383853	0.801271	1	0.00205922	0.995637	1	5.731	5.569	5.366	5.366	4.045	3.034
72128	2610008E11Rik	NM_001004362	chr10	78527119	78560345	-	4221	1	2610008E11Rik|-|-|10|10 C1|protein-coding	0.341274	0.056095	0.815056	1.20313	3.5e-06	9.63e-05	1.59402	1.65e-19	4.06e-18	0.0259863	0.898447	1	-0.0188239	0.933914	1	1.433	1.362	1.348	1.772	3.114	4.738
72518	2610307P16Rik	NR_045053	chr13	28551903	28977291	-	2494	1	2610307P16Rik|AI666457|-|13|13 A3.1|ncRNA	-0.380129	0.113167	1	-1.55805	1.71e-05	0.000410868	-2.36189	2.69e-14	4.6e-13	0.285688	0.207553	1	0.146955	0.54159	1	1.307	1.148	1.023	0.818	0.332	0.231
72578	2700054A10Rik	NR_045437	chr17	13679887	13746960	-	4204	1	2700054A10Rik|-|-|-|ncRNA	0.0994308	0.576097	1	-1.01158	0.000151958	0.00291398	-1.47373	3.86e-11	4.97e-10	0.0824509	0.643682	1	-0.0238143	0.907559	1	2.415	2.215	2.2	2.441	1.08	0.913
108899	2700081O15Rik	NM_175381	chr19	7492115	7500394	+	4982	1	2700081O15Rik|AI255177|AI848741|AW742297|-|19|19 A|protein-coding	0.0815189	0.606701	1	0.761022	0.00190777	0.0248247	1.75288	3.47e-26	1.22e-24	0.136508	0.384387	1	0.169937	0.288527	1	7.893	7.834	6.929	7.601	11.479	27.019
72650	2810006K23Rik	NM_001134717	chr5	124778098	124791861	+	1689	1	2810006K23Rik|-|-|5|5 F|protein-coding	-0.172673	0.348896	1	-0.367024	0.185377	0.744323	-1.12593	7.4e-08	6.53e-07	-0.148228	0.427078	1	-0.0734034	0.691256	1	6.291	6.523	6.632	6.201	4.929	3.555
70419	2810408A11Rik	NM_027419	chr11	69710860	69714488	-	1663	1	2810408A11Rik|1700019L01Rik|4930470J18Rik|-|11|11|protein-coding	0.439479	0.0743527	0.963833	1.57408	1.42e-07	5.13e-06	1.21721	1.3e-06	9.56e-06	0.525512	0.0271298	1	0.436279	0.0882063	1	1.457	1.315	0.975	1.364	2.867	2.63
69941	2810408I11Rik	NR_038009	chr1	64726443	64737233	-	711	1	2810408I11Rik|-|-|1|1|ncRNA	0.273516	0.204745	1	0.333353	0.327304	1	-1.22728	9.06e-07	6.87e-06	-0.111822	0.639215	1	-0.27141	0.275474	1	3.508	3.177	3.637	4.556	4.178	1.8
100042332	2810410L24Rik	NR_030682	chr11	120047964	120051170	-	1704	1	2810410L24Rik|-|-|11|11 E2|ncRNA	-0.00344215	1	1	0.940678	0.0217251	0.170615	1.45364	5.18e-11	6.58e-10	0.076131	0.75234	1	0.0894095	0.704774	1	2.286	2.191	2.069	2.162	3.479	6.627
68026	2810417H13Rik	NM_026515	chr9	65738130	65751358	+	2381	1	2810417H13Rik|AA409629|Ns5apt9|Ns5atp9|PAF15|Paf|mKIAA0101|p15(PAF)|-|9|9 C|protein-coding	-0.118326	0.5254	1	0.424722	0.139429	0.623757	-1.08569	4.65e-09	4.72e-08	-0.149471	0.406584	1	-0.277597	0.124338	1	110.649	99.675	116.341	110.882	147.569	64.519
72792	2810459M11Rik	NM_001144992	chr1	87942438	87952031	+	3326	1	2810459M11Rik|-|-|1|1 C5|protein-coding	-1.08787	2.01e-06	0.000215041	-3.21836	9.07e-21	1.58e-18	-3.76033	1.14e-41	7.78e-40	-0.293438	0.147118	1	-0.265602	0.187914	1	1.348	1.38	1.587	0.791	0.165	0.135
67261	2900005J15Rik	NR_027851	chr5	24606793	24608825	+	2032	1	2900005J15Rik|-|-|5|5 A3|ncRNA	5.13e-15	1	1	5.13e-15	1	1	5.84943	0.000566763	0.00262196	0	1	1	0	1	1	0	0	0	0	0	0.097
73212	3110082I17Rik	NM_028469	chr5	139835693	139936488	-	1454	1	3110082I17Rik|AW411904|-|5|5 G2|protein-coding	-0.0505406	0.759445	1	-0.927265	0.000240853	0.00430617	-1.48778	1.02e-16	2.07e-15	-0.0218208	0.893371	1	-0.0588222	0.721638	1	25.628	24.484	24.777	25.174	12.555	10.329
100504518	3425401B19Rik	NM_001195097	chr14	33472305	33498458	-	5541	1	3425401B19Rik|-|-|14|14 B|protein-coding	5.13e-15	1	1	2.52713	1	1	5.63684	0.00121747	0.00528445	2.30371	1	1	0	1	1	0.002	0	0	0	0.002	0.03
100043102	4632428C04Rik	NR_033631	chr16	30008753	30021516	+	2425	1	4632428C04Rik|Gm4231|-|16 B2|16|ncRNA	-0.704693	0.0660995	0.90261	-0.95301	0.0302358	0.218461	-1.55714	0.000112452	0.00059681	-0.440813	0.223596	1	0.236292	0.494549	1	0.238	0.374	0.31	0.197	0.158	0.122
654804	4732471J01Rik	NR_073028	chr7	26161838	26170753	+	986	1	4732471J01Rik|-|-|7|7 A3|ncRNA	0.795514	0.053457	0.793149	1.70736	2.45e-05	0.00056867	1.39178	0.000113731	0.000602799	-0.725516	0.175777	1	-0.294006	0.556785	1	0.239	0.319	0.381	0.684	1.241	1.17
73906	4833417C18Rik	NR_045187	chr11	95720131	95722360	+	1317	1	4833417C18Rik|-|-|11|11|ncRNA	-0.0359454	0.960744	1	-1.34232	0.000231039	0.00416512	-1.15195	6.71e-05	0.000370578	0.103081	0.744891	1	0.132556	0.60683	1	1.394	1.376	1.249	1.261	0.494	0.651
74597	4833418N02Rik	NR_015506	chr17	87674226	87682154	-	1525	1	4833418N02Rik|-|-|17|17 E4|ncRNA	-0.515793	0.447258	1	2.05308	1.34e-06	4e-05	2.49221	1.49e-11	2.01e-10	-1.50412	0.0169627	0.942037	-0.452001	0.490269	1	0.069	0.143	0.193	0.14	0.786	1.273
70874	4921513I03Rik	NR_038000	chr10	120202788	120215942	+	1573	1	4921513I03Rik|-|-|10|10 D2|ncRNA	5.13e-15	1	1	7.9761	1.06e-12	8.14e-11	11.2138	2.36e-72	4.03e-70	0	1	1	0	1	1	0	0	0	0	0.47	5.239
70900	4921517D22Rik	NM_183290	chr13	59788763	59795462	-	3135	1	4921517D22Rik|-|-|13|13 B2|protein-coding	-0.130418	0.801487	1	1.35374	0.0169187	0.141807	1.15775	0.00248433	0.0100607	0.0826195	0.887928	1	-0.849303	0.0602587	1	0.218	0.112	0.195	0.189	0.439	0.516
66730	4921531C22Rik	NR_033782	chr2	179711558	179713718	+	1903	1	4921531C22Rik|-|-|2|2|ncRNA	0.431999	0.325209	1	1.45553	0.00229678	0.028796	2.01329	5.71e-10	6.45e-09	0.220624	0.673638	1	-0.224782	0.578264	1	0.303	0.222	0.247	0.346	0.636	1.175
67394	4930404I05Rik	NR_028368	chr16	91011494	91016748	+	975	1	4930404I05Rik|-|-|16|16 C4|ncRNA	1.16502	0.183035	1	0.902719	0.284664	0.947711	2.31793	0.000356465	0.00171851	1.7158	0.0133775	0.829612	1.70921	0.0171711	0.757641	0.253	0.248	0.072	0.169	0.131	0.433
432479	4930404N11Rik	NM_001014836	chr10	80826769	80828565	-	689	1	4930404N11Rik|2210409H10Rik|5730551K18Rik|AI854616|-|10|10 C1|protein-coding	0.126092	0.516197	1	-0.0267806	0.941041	1	1.22773	8.53e-10	9.45e-09	-0.467699	0.0206121	1	-0.340952	0.128425	1	4.952	5.19	6.568	7.446	6.217	17.9
74629	4930426L09Rik	NR_024323	chr2	18919946	18921431	+	1485	1	4930426L09Rik|-|-|2|2 A3|ncRNA	2.05144	0.0347736	0.622636	3.71079	5.33e-06	0.00014027	4.28305	1.23e-11	1.69e-10	0.345968	1	1	0.391401	1	1	0.032	0.033	0.024	0.111	0.3	0.578
104732	4930427A07Rik	NM_134041	chr12	114394632	114403669	+	3345	1	4930427A07Rik|AA536649|mFLJ00116|-|12|12 F1|protein-coding	0.208885	0.181993	1	-0.273345	0.252973	0.883434	-1.10938	3.59e-11	4.67e-10	-0.25427	0.0925414	1	-0.253392	0.100812	1	8.4	8.267	9.621	11.616	7.744	5.175
75015	4930503B20Rik	NM_029144	chr3	146309223	146314281	-	1010	1	4930503B20Rik|1700013A07Rik|1700095G21Rik|4930483N21Rik|Gm1652|Samd13|-|3|3 H2|protein-coding	-0.624641	0.109544	1	-0.813691	0.0731573	0.40714	-2.7945	1.86e-11	2.49e-10	-0.20743	0.495439	1	-0.0830201	0.827939	1	0.99	1.041	1.094	0.716	0.581	0.181
74954	4930503E14Rik	NM_029131	chr14	44740832	44749036	-	1283	1	4930503E14Rik|-|-|14|14 C1|protein-coding	-0.398489	0.366398	1	-0.104159	1	1	-1.41985	0.00161903	0.00683749	-0.570317	0.137018	1	-0.546848	0.190522	1	0.321	0.32	0.458	0.359	0.368	0.197
74724	4930512B01Rik	NR_033573	chr12	70891331	70942867	+	1413	1	4930512B01Rik|4930472D12Rik|-|12|12 C2|ncRNA	1.38573	0.117678	1	2.31214	0.00143029	0.0195089	2.65466	2.4e-05	0.000143939	-0.301575	1	1	-0.257967	1	1	0.042	0.043	0.05	0.14	0.235	0.378
67647	4930523C07Rik	NM_001162896	chr1	161974511	162008717	+	4029	1	4930523C07Rik|-|-|1|1 H2.1|protein-coding	-0.843143	9.4e-07	0.000110216	-1.79423	5.92e-12	4.2e-10	-2.75851	5.55e-34	2.81e-32	0.363423	0.0271098	1	0.345831	0.0461886	1	6.731	6.665	5.047	2.91	1.411	0.859
207819	4930539E08Rik	NM_172450	chr17	29033340	29052269	-	4580	1	4930539E08Rik|9130014G02|-|17|17 A3.3|protein-coding	0.0935654	0.682211	1	0.464231	0.0984534	0.498743	1.11719	4.1e-08	3.73e-07	0.0560344	0.79334	1	-0.146839	0.524248	1	0.624	0.546	0.577	0.639	0.777	1.452
77594	4930552P12Rik	NR_045318	chr19	55715079	55776694	-	2492	1	4930552P12Rik|-|-|19|19 D2|ncRNA	3.38505	0.522237	1	4.71016	0.0534661	0.329329	6.21172	3.38e-05	0.000197156	2.30362	1	1	2.39882	1	1	0.005	0.005	0	0.013	0.031	0.102
75259	4930556M19Rik	NR_045065	chr15	10644655	10651966	+	1997	1	4930556M19Rik|1700009D01Rik|C130022M03Rik|-|15|15 A1|ncRNA	4.0207	0.186605	1	4.31473	0.120798	0.567294	5.74822	0.000632201	0.00290125	3.1449	0.522265	1	0	1	1	0.012	0	0	0.025	0.026	0.092
75323	4930558J18Rik	NR_037999	chr1	57416066	57434388	-	2048	1	4930558J18Rik|-|-|1|1|ncRNA	-0.175399	0.525387	1	-0.0720093	0.880386	1	-1.12828	0.00013715	0.000718059	-0.0643532	0.82404	1	0.048904	0.894278	1	0.747	0.796	0.752	0.69	0.691	0.398
75255	4930562F07Rik	NR_038030	chr1	162004866	162008049	-	827	1	4930562F07Rik|-|-|1|1 H2.1|ncRNA	-1.09847	3.19e-05	0.00242432	-1.65316	5.08e-06	0.000134701	-2.60214	4.41e-17	9.22e-16	0.331365	0.166121	1	0.244408	0.321272	1	6.445	6.033	4.975	2.386	1.48	0.935
68306	4930565N06Rik	NR_040476	chr16	36880605	36897275	-	2413	1	4930565N06Rik|4930428L02Rik|-|16|16|ncRNA	-0.265544	0.739463	1	0.210236	0.670786	1	1.7317	5.3e-08	4.76e-07	0.124562	0.851415	1	-0.195299	0.677737	1	0.21	0.165	0.185	0.157	0.206	0.717
75939	4930579G24Rik	NM_029482	chr3	79433001	79436741	+	1965	1	4930579G24Rik|-|-|3|3 F1|protein-coding	-0.105164	0.522516	1	-0.197364	0.437167	1	-1.39992	1.12e-14	1.96e-13	-0.188325	0.259782	1	-0.160627	0.336807	1	10.395	10.519	11.299	10.92	9.413	4.995
75881	4930579K19Rik	NR_029444	chr9	98462879	98464030	-	1151	1	4930579K19Rik|-|-|9|9 E3.3|ncRNA	2.68113	0.152309	1	4.19356	0.00115592	0.016327	3.98793	0.000216718	0.0010898	1.33752	0.647391	1	2.62622	0.0663242	1	0.031	0.073	0.01	0.086	0.199	0.232
75880	4930592A05Rik	NR_045070	chr15	33523636	33583191	-	1000	1	4930592A05Rik|-|-|15|15 B3.1|ncRNA	-0.0965921	0.761323	1	0.559942	0.131319	0.596829	1.08301	3.23e-05	0.000189605	-0.324973	0.261647	1	0.232719	0.465386	1	0.953	1.401	1.14	1.118	1.721	2.827
210940	4931408C20Rik	NM_001033764	chr1	26738646	26744305	-	4327	1	4931408C20Rik|-|-|1|1 A5|protein-coding	5.13e-15	1	1	5.74694	0.00474324	0.0521063	7.15931	2.47e-09	2.59e-08	0	1	1	3.61534	0.304736	1	0	0.008	0	0	0.041	0.114
74356	4931428F04Rik	NM_028888	chr8	107804309	107813428	-	3543	1	4931428F04Rik|AI426165|Kiaa0895l|-|8|8 D3|protein-coding	0.511084	0.010886	0.283	1.79868	5.7e-11	3.51e-09	3.40751	5.87e-63	7.8e-61	0.0555479	0.786409	1	-0.0209629	0.93714	1	3.249	2.967	3.037	4.452	10.504	36.861
70988	4931428L18Rik	NR_033445	chr1	31197923	31279501	-	1091	1	4931428L18Rik|4930563O14Rik|-|1|1 A5-B|ncRNA	5.13e-15	1	1	4.31514	0.121066	0.567294	6.36271	1.3e-05	8.17e-05	0	1	1	0	1	1	0	0	0	0	0.047	0.258
74364	4931431C16Rik	NR_045807	chr5	35923876	35931412	-	2731	1	4931431C16Rik|-|-|5|5 B3|ncRNA	0.858134	0.0314373	0.584213	0.967985	0.118598	0.561182	1.12729	0.00357469	0.0140344	0.294406	0.498874	1	0.443281	0.290143	1	0.207	0.221	0.164	0.307	0.345	0.412
71004	4931440P22Rik	NR_027955	chr3	65331407	65333336	-	1857	1	4931440P22Rik|-|-|3|3 E1|ncRNA	0.689294	0.0356397	0.633428	1.36477	0.000251924	0.00448409	1.84574	1.33e-10	1.61e-09	-0.115998	0.782069	1	0.000909406	1	1	0.361	0.377	0.373	0.629	0.954	1.575
545732	4933402N22Rik	NM_001177510	chr5	11918043	11922804	+	1101	1	4933402N22Rik|-|-|5 A1|5|protein-coding	-0.225835	0.660335	1	-2.81524	5.15e-05	0.00110482	-2.28452	2.9e-05	0.0001716	-2.07023	8.19e-05	0.020094	-2.9801	1.41e-06	0.00049716	0.107	0.055	0.438	0.388	0.058	0.102
66752	4933404O12Rik	NR_015555	chr5	137395016	137412979	+	3966	1	4933404O12Rik|AW494809|-|-|ncRNA	0.0820701	0.614457	1	-0.736037	0.00275168	0.0334021	-1.11989	2.31e-11	3.06e-10	0.105336	0.50758	1	0.0300341	0.855719	1	12.306	11.575	11.052	12.052	6.586	5.865
71141	4933407L21Rik	NR_037692	chr1	87825058	87828331	+	1145	1	4933407L21Rik|-|-|1|1 C5|ncRNA	3.94093	0.277953	1	5.65128	0.0019546	0.0253232	8.47718	2.51e-15	4.62e-14	0	1	1	0	1	1	0	0	0	0.043	0.134	1.081
271508	4933408B17Rik	NM_177773	chr18	34739500	34757122	-	2354	1	4933408B17Rik|-|-|18|18 B1|protein-coding	1.18917	0.0759551	0.97361	1.50261	0.0389852	0.26244	1.65996	0.00801258	0.0291055	1.01114	0.125251	1	0.308611	0.839705	1	0.095	0.056	0.045	0.105	0.13	0.167
71186	4933417D19Rik	NR_045849	chr8	125758991	125766259	+	1226	1	4933417D19Rik|-|-|8|8|ncRNA	0.422271	0.80278	1	0.096493	1	1	1.79274	0.0122779	0.0427706	0.716018	0.431657	1	0.929349	0.245149	1	0.115	0.128	0.067	0.094	0.073	0.275
100504166	4933421O10Rik	NR_036602	chr4	33114114	33118298	-	3848	1	4933421O10Rik|-|-|4 14.61 cM|4 A5|ncRNA	-0.0983447	0.690107	1	0.545889	0.0529934	0.327424	1.32374	2.78e-11	3.66e-10	0.0322192	0.895733	1	-0.331596	0.18748	1	0.792	0.59	0.742	0.718	1.063	2.167
214106	4933430I17Rik	NM_177607	chr4	62186403	62209027	+	1766	1	4933430I17Rik|bN189G18.7|-|4|4 B3|protein-coding	1.35967	0.00879553	0.239803	2.75641	1.83e-06	5.34e-05	5.54464	3.88e-58	4.44e-56	0.979675	0.0679627	1	0.827661	0.186587	1	0.193	0.171	0.093	0.251	0.686	5.16
71208	4933440M02Rik	NR_045803	chr7	132475296	132493300	-	1741	1	4933440M02Rik|-|-|7|7 F3|ncRNA	5.13e-15	1	1	5.17674	0.0221699	0.172978	6.83998	1.17e-07	1e-06	0	1	1	0	1	1	0	0	0	0	0.069	0.235
269630	5031425E22Rik	NR_040469	chr5	22937626	22940171	-	2545	1	5031425E22Rik|-|-|5|5 A3|ncRNA	0.0819807	0.668207	1	0.795146	0.00459673	0.0507985	1.2666	4.42e-12	6.26e-11	-0.0447708	0.835416	1	0.0384542	0.858578	1	1.812	1.818	1.801	1.971	2.945	5.028
223739	5031439G07Rik	NM_001033273	chr15	84776150	84818401	-	5020	1	5031439G07Rik|AW554572|mKIAA0930|-|15|15 E2|protein-coding	0.274938	0.0849889	1	1.1138	3.54e-05	0.000785043	1.90447	1.97e-31	8.96e-30	-0.274034	0.0698884	1	-0.286697	0.0635386	1	6.117	5.961	7.109	9.008	15.892	30.885
73183	5430402O13Rik	NR_015581	chr6	50516642	50544864	+	1003	1	5430402O13Rik|3110047M22Rik|-|6|6|ncRNA	0.426642	0.743734	1	1.93568	0.0480962	0.303482	2.86429	0.000272224	0.00134418	0.247077	1	1	-0.419868	0.709216	1	0.063	0.039	0.05	0.07	0.19	0.45
74487	5430405H02Rik	NR_015591	chr2	156678139	156688681	-	1506	1	5430405H02Rik|2610307N17Rik|-|2|2 H2|ncRNA	0.735422	0.00457305	0.144886	0.923115	0.00470136	0.0517408	1.35658	3.88e-08	3.55e-07	0.211742	0.453939	1	0.253258	0.381078	1	0.974	1	0.857	1.483	1.452	2.49
70489	5730405O15Rik	NR_038158	chrX	12619141	12622421	+	884	1	5730405O15Rik|-|-|X|X|ncRNA	1.24991	0.00697823	0.20107	1.35293	0.0464478	0.296732	1.63118	0.000234913	0.00117222	0.475828	0.428027	1	0.660607	0.19305	1	0.399	0.437	0.279	0.688	0.62	1.002
230757	5730409E04Rik	NM_001145950	chr4	126287098	126291615	+	2851	1	5730409E04Rik|7530403E16Rik|AI849033|-|4|4 D2.2|protein-coding	5.13e-15	1	1	2.30813	1	1	7.58462	2.79e-12	4.07e-11	0	1	1	2.40272	1	1	0	0.004	0	0	0.004	0.232
70550	5730416F02Rik	NR_033596	chrX	106196824	106197635	+	811	1	5730416F02Rik|-|-|X|X D|pseudo	-0.432549	1	1	0.0668185	1	1	2.98689	0.00255513	0.0103266	-0.0371988	1	1	-0.0250261	1	1	0.029	0.03	0.029	0.02	0.031	0.295
433966	5730422E09Rik	NR_015478	chr5	149931141	149993612	-	1712	1	5730422E09Rik|-|-|5|5 G3|ncRNA	0.246439	0.842347	1	2.5877	7.89e-06	0.000202815	4.93949	5.83e-38	3.47e-36	-0.0613171	1	1	-0.00230543	1	1	0.076	0.078	0.076	0.096	0.432	2.768
244234	5830411N06Rik	NM_001128146	chr7	147433277	147485690	+	3325	1	5830411N06Rik|Scart2|-|7|7 F4|protein-coding	0.0693254	0.739201	1	-1.95997	7.13e-12	4.98e-10	-3.23134	2.43e-27	9.01e-26	0.590362	0.00491794	0.465304	0.670563	0.00101838	0.116614	45.412	46.742	29.533	32.03	7.357	3.571
100529079	5830418P13Rik	NR_040466	chr9	103325908	103363590	+	2172	1	5830418P13Rik|-|-|9 55.37 cM|9 F1|ncRNA	-0.366383	0.0321429	0.590031	-0.943634	0.000766753	0.0115271	-1.06175	2.57e-09	2.69e-08	-0.288885	0.0887926	1	-0.337333	0.0528103	1	12.617	11.863	14.671	11.893	7.108	8.249
319616	5930412G12Rik	NR_015517	chr5	129085005	129106562	-	2399	1	5930412G12Rik|-|-|5|5|ncRNA	0.0915326	0.717133	1	0.499896	0.0940621	0.485284	1.54675	2.62e-10	3.08e-09	0.0425118	0.861012	1	0.116331	0.626104	1	0.951	0.982	0.887	0.98	1.217	3.007
319982	5930430L01Rik	NR_102383	chr5	149801632	149806790	-	3983	1	5930430L01Rik|-|-|5|5|ncRNA	-0.0204118	0.934837	1	-0.604924	0.03174	0.225555	-1.9268	1.37e-15	2.6e-14	0.214863	0.275809	1	0.0801497	0.684971	1	2	1.698	1.639	1.61	0.998	0.509
76133	6230400D17Rik	NR_029446	chr14	21521234	21522321	-	1087	1	6230400D17Rik|-|-|14|14|ncRNA	-0.440776	0.171324	1	0.38012	0.422861	1	-1.2067	0.00019976	0.00101364	-0.714817	0.0225442	1	-0.304214	0.340131	1	3.983	5.079	6.11	4.689	6.931	3.157
103712	6330403K07Rik	NM_134022	chr11	70845443	70847119	-	1594	1	6330403K07Rik|AI415455|AV161034|UGS148|-|11|11 B4|protein-coding	-1.22503	0.0855133	1	-0.233747	0.891651	1	-2.27592	0.00955068	0.0340901	-1.03139	0.190069	1	-0.817685	0.190568	1	0.059	0.068	0.118	0.052	0.088	0.026
69004	6330418K02Rik	NR_045821	chr5	138705273	138707889	+	738	1	6330418K02Rik|-|-|5|5|ncRNA	0.30387	0.447829	1	2.18995	1.22e-06	3.69e-05	1.75344	6.91e-09	6.92e-08	0.0702632	0.877784	1	0.138314	0.724608	1	0.925	0.884	0.844	1.092	3.455	3.335
234797	6430548M08Rik	NM_172286	chr8	122638052	122689207	+	5550	1	6430548M08Rik|AW049007|Kiaa0513|mKIAA0513|-|8|8 E1|protein-coding	1.10601	0.535974	1	4.05536	2.25e-07	7.84e-06	4.85027	4.75e-18	1.06e-16	1.10305	0.393728	1	1.12153	0.54215	1	0.02	0.007	0.007	0.038	0.182	0.385
320095	6430550D23Rik	NM_001145351	chr2	155826179	155830163	-	1865	1	6430550D23Rik|-|-|2|2 H1|protein-coding	1.09672	0.0978745	1	1.43388	0.0293228	0.213171	1.94332	0.000402516	0.00191669	0.99707	0.097608	1	0.37964	0.702536	1	0.132	0.084	0.063	0.141	0.171	0.287
71617	9130011E15Rik	NM_198296	chr19	45892634	46072978	-	2868	1	9130011E15Rik|AI431055|AW050122|-|19|19 C3|protein-coding	0.162003	0.333001	1	0.905745	0.000282456	0.0049542	1.08931	4.71e-11	6.01e-10	0.0567154	0.736413	1	0.0120541	0.958314	1	4.788	4.642	4.439	5.137	8.361	10.934
100042056	9130019P16Rik	NR_033635	chr6	54219675	54380215	-	4472	1	9130019P16Rik|6430501H15Rik|OTTMUSG00000023151|-|6 B3|6|ncRNA	5.13e-15	1	1	4.55274	0.0633136	0.368538	8.74028	8.45e-24	2.67e-22	2.30369	1	1	3.29783	0.541177	1	0.003	0.005	0	0	0.014	0.33
234912	9230110C19Rik	NM_199017	chr9	8021672	8042823	-	1583	1	9230110C19Rik|-|-|9|9 A1|protein-coding	-0.135101	0.618284	1	-0.404604	0.328956	1	-1.6376	1.18e-06	8.78e-06	0.252765	0.347126	1	0.366202	0.162734	1	1.1	1.168	0.884	0.841	0.62	0.329
320692	9430037G07Rik	NR_040766	chr9	88490163	88494081	-	3172	1	9430037G07Rik|-|-|9|9|ncRNA	-0.758486	0.0779276	0.979536	-1.8348	0.00100247	0.0144957	-2.50249	2.57e-06	1.81e-05	-0.35286	0.366356	1	-0.405582	0.301955	1	0.145	0.137	0.178	0.109	0.048	0.035
77252	9430038I01Rik	NM_029886	chr7	144567252	144602439	-	1119	1	9430038I01Rik|-|-|7|7 F4|protein-coding	-0.241398	0.282648	1	-0.279901	0.461036	1	-1.25553	1.19e-07	1.02e-06	-0.355348	0.108907	1	-0.187014	0.40092	1	9.495	10.504	11.481	10.124	8.419	5.68
319482	9530053A07Rik	NM_001164655	chr7	28914485	28949830	+	7900	1	9530053A07Rik|FCGBP|-|7|7 A3|protein-coding	0.216242	0.289159	1	-1.78306	1.48e-08	6.31e-07	-2.33257	1.31e-11	1.79e-10	-1.31731	1e-08	6.33e-06	-1.37934	2.91e-09	2.33e-06	0.237	0.226	0.571	0.679	0.165	0.13
667214	9930111J21Rik1	NM_001114679	chr11	48759652	48792883	-	3857	1	9930111J21Rik1|9930111J21Rik|Iigp|-|11|11 B1.2|protein-coding	-0.133414	0.565749	1	0.102354	0.757447	1	2.19037	7.08e-26	2.45e-24	0.0828147	0.760919	1	0.12356	0.656428	1	1.446	1.381	1.329	1.27	1.454	6.978
245240	9930111J21Rik2	NM_173434	chr11	48851162	48864744	-	2398	2	9930111J21Rik2|9930111J21Rik|Irgb5|OTTMUSG00000005540|-|11|11 B1.2|protein-coding	-0.0459734	0.82558	1	0.206924	0.491056	1	2.2098	2.2e-27	8.19e-26	0.150275	0.55426	1	-0.0544617	0.87006	1	2.39	1.939	2.088	2.112	2.451	11.148
320977	A330023F24Rik	NR_015566	chr1	196843593	196864102	+	5187	1	A330023F24Rik|C030002C11Rik|-|1|1|ncRNA	0.512339	0.234342	1	-0.0932962	0.85935	1	1.06472	0.00384726	0.0150138	0.368613	0.454087	1	0.424686	0.306198	1	0.111	0.112	0.084	0.124	0.079	0.203
319727	A330035P11Rik	NR_015586	chr14	122497161	122506196	-	2707	1	A330035P11Rik|-|-|14|14 E5|ncRNA	0.334089	0.519747	1	0.58066	0.246689	0.869892	1.73528	3.39e-06	2.34e-05	0.0950509	0.924486	1	0.0815445	1	1	0.17	0.165	0.152	0.2	0.217	0.592
74333	A330040F15Rik	NR_015503	chr19	12660358	12671056	-	1104	1	A330040F15Rik|-|-|19|19|ncRNA	-0.0774181	0.905043	1	-0.0374409	1	1	2.74411	1.47e-18	3.4e-17	-0.62335	0.174181	1	-0.253639	0.515254	1	0.245	0.317	0.362	0.357	0.346	2.841
215493	A3galt2	NM_001009819	chr4	128436502	128446542	+	3383	1	A3galt2|Gm433|iGb3|iGb3S|-|4|4 D2.2|protein-coding	0.181923	0.844071	1	-0.825728	0.403618	1	1.76046	0.000891783	0.00398009	0.602306	0.331676	1	0.532136	0.416837	1	0.066	0.061	0.042	0.049	0.023	0.166
381287	A530032D15Rik	NM_213615	chr1	85084714	85106428	-	1751	1	A530032D15Rik|Gm1888|-|1|1 C5|protein-coding	0.475746	0.0897301	1	1.1408	0.00213036	0.0270765	3.25107	1.42e-47	1.2e-45	0.0140217	1	1	0.168163	0.580997	1	0.618	0.669	0.591	0.845	1.347	6.537
100415915	A530072M11Rik	NR_045765	chr4	16091257	16193372	+	1845	1	A530072M11Rik|-|-|-|ncRNA	0.0445054	1	1	1.11117	0.0579913	0.348619	1.79944	0.00156817	0.00664373	0.602335	0.231481	1	0.805955	0.147873	1	0.172	0.196	0.108	0.116	0.221	0.442
319997	A630001G21Rik	NM_177055	chr1	87613658	87633181	-	1928	1	A630001G21Rik|-|-|1|1 C5|protein-coding	0.625199	0.000321173	0.0174734	1.89066	2.44e-14	2.38e-12	2.05873	7.67e-31	3.37e-29	-0.0478047	0.783514	1	0.0263498	0.897464	1	4.803	5.013	4.761	7.531	17.568	23.122
213438	A630033H20Rik	NM_175442	chrX	104344954	104369000	+	3004	1	A630033H20Rik|AI662791|P2ry10|-|X|X D|protein-coding	0.142981	0.504889	1	0.952531	0.000540842	0.00860161	1.43641	7.31e-13	1.12e-11	-0.289136	0.156913	1	-0.378278	0.0722446	1	1.105	1.029	1.291	1.5	2.419	4.087
654800	A730085K08Rik	NR_045967	chr9	122291140	122307919	-	563	1	A730085K08Rik|-|-|9|9 F4|ncRNA	3.90533	8.17e-07	9.72e-05	7.09932	4.04e-35	1.94e-32	8.13909	3.58e-80	7.48e-78	-0.919487	1	1	-0.0702101	1	1	0.021	0.043	0.042	0.73	6.317	15.436
68162	A930003A15Rik	NR_027896	chr16	19876661	19884367	-	1016	1	A930003A15Rik|AI853191|-|16|16 A3|ncRNA	-0.177251	0.853832	1	-2.07484	0.0783029	0.426779	-3.58884	0.0021235	0.00873333	-1.35316	0.0852207	1	-1.52735	0.0674054	1	0.069	0.059	0.174	0.162	0.038	0.014
77940	A930004D18Rik	NR_028376	chr2	17946816	17959368	-	3223	1	A930004D18Rik|AU022051|-|2|2 A2|ncRNA	0.540249	0.0086721	0.237035	0.803156	0.00401334	0.0455015	1.26313	2.33e-10	2.75e-09	0.19457	0.368929	1	0.215672	0.310898	1	0.953	0.941	0.799	1.204	1.38	2.23
77779	A930007I19Rik	NR_015567	chr19	29578153	29596477	-	2313	1	A930007I19Rik|-|-|19|19|ncRNA	0.314875	0.852223	1	0.215416	0.885343	1	1.56036	0.0133289	0.0459857	0.458884	0.534148	1	0.776099	0.231407	1	0.086	0.104	0.061	0.078	0.066	0.207
109202	A930024E05Rik	NR_045820	chr5	123439363	123448350	+	1889	1	A930024E05Rik|-|-|5|5 F|ncRNA	0.274768	0.530709	1	0.619839	0.160368	0.687289	1.39319	6.56e-05	0.000363369	0.253446	0.593653	1	-0.00332882	1	1	0.293	0.243	0.236	0.296	0.358	0.722
433752	AA415398	NM_001004178	chr4	119202923	119211374	-	1893	1	AA415398|-|-|4|4 D2.1|protein-coding	0.217796	0.62532	1	-0.268551	0.625166	1	1.00089	0.0109313	0.0385152	0.0728221	0.889213	1	0.308281	0.471965	1	0.472	0.53	0.441	0.521	0.377	1.003
613254	AA465934	NR_028363	chr11	83105201	83108139	+	386	1	AA465934|-|-|-|ncRNA	-0.558172	0.0684789	0.918685	0.145946	0.801247	1	-1.00415	0.00181146	0.00756386	-0.840227	0.012044	0.797854	-0.335213	0.312733	1	3.505	4.757	5.938	4.26	5.449	3.497
66129	Aaed1	NM_025370	chr13	64393144	64414018	-	964	1	Aaed1|1110018J18Rik|AI849003|-|13|13 B3|protein-coding	0.170231	0.449952	1	0.98629	0.000694804	0.0106488	1.06695	3.96e-07	3.15e-06	-0.150584	0.516573	1	-0.0472525	0.903424	1	2.441	2.531	2.597	3.019	4.919	6.346
69684	Aarsd1	NM_144829	chr11	101268154	101278747	-	1319	1	Aarsd1|1110069E20Rik|2310044P18Rik|AA589600|AlaX|AlaXp-II|-|11|11 D|protein-coding	0.00771275	0.964542	1	-0.246574	0.324609	1	-1.07209	1.33e-11	1.81e-10	-0.088213	0.568243	1	0.00142615	0.995874	1	46.279	48.907	47.097	49.616	38.505	26.089
56321	Aatf	NM_019816	chr11	84236358	84327003	-	1785	1	Aatf|4933415H02Rik|5830465M17Rik|Che-1|Trb|-|11|11 B5|protein-coding	0.113302	0.488136	1	-0.626481	0.0134919	0.119236	-1.09075	1.3e-11	1.78e-10	0.0429321	0.786279	1	0.160384	0.332804	1	44.929	48.801	41.946	47.422	27.282	22.808
11302	Aatk	NM_007377	chr11	119868632	119908459	-	5673	1	Aatk|AATYK|aatyk1|mKIAA0641|-|11|11 E2|protein-coding	5.13e-15	1	1	2.30882	1	1	6.13099	6.59e-05	0.000364845	3.1449	0.522215	1	3.19114	0.528271	1	0.005	0.005	0	0	0.002	0.046
268379	Abca13	NM_178259	chr11	9091945	9584262	+	15947	1	Abca13|9830132L24|A930002G16Rik|AI956815|-|11|11 A2|protein-coding	-0.0122975	1	1	-2.1369	0.0129585	0.115712	-2.16288	0.0109899	0.0386931	-3.16801	0.000576186	0.094901	-1.33248	0.133189	1	0.001	0.005	0.014	0.014	0.003	0.004
217262	Abca9	NM_147220	chr11	109962136	110029467	-	6227	1	Abca9|D630040K07Rik|-|11|11 E1|protein-coding	2.47794	1	1	4.84506	0.0413759	0.273944	5.52643	0.0100409	0.0356809	0	1	1	0	1	1	0	0	0	0.003	0.012	0.025
18671	Abcb1a	NM_011076	chr5	8660092	8748570	+	4947	1	Abcb1a|Abcb4|Evi32|Mdr1a|Mdr3|P-gp|Pgp|Pgy-3|Pgy3|mdr-3|-|5 A1|5 3.43 cM|protein-coding	0.009972	1	1	-1.91988	6.33e-07	2.03e-05	-2.05414	1.25e-16	2.53e-15	-0.591134	0.00656737	0.561609	-0.593708	0.00587594	0.386062	0.597	0.584	0.86	0.904	0.242	0.242
18669	Abcb1b	NM_011075	chr5	8798147	8866314	+	4314	1	Abcb1b|Abcb1|Mdr1|Mdr1b|Pgy-1|Pgy1|mdr|-|5 A1|5 3.43 cM|protein-coding	-0.0290878	0.875089	1	-1.5054	5.14e-08	2e-06	-2.43819	3.96e-32	1.86e-30	-0.406923	0.0402136	1	-0.549753	0.00166981	0.163898	2.935	2.604	3.768	3.789	1.35	0.802
224814	Abcc10	NM_170680	chr17	46440179	46464972	-	4834	1	Abcc10|Mrp7|mFLJ00002|-|17|17 C|protein-coding	0.677851	0.00358313	0.118683	1.69503	7.94e-09	3.6e-07	2.79344	1.34e-34	6.98e-33	0.343477	0.220689	1	0.229375	0.330506	1	1.198	1.067	0.922	1.486	2.985	7.363
12780	Abcc2	NM_013806	chr19	43856798	43912708	+	5355	1	Abcc2|AI173996|Abc30|Cmoat|Mrp2|cMRP|-|19 C3|19 36.67 cM|protein-coding	0.704199	0.742097	1	5.10887	9.55e-20	1.58e-17	7.199	2.33e-78	4.56e-76	-0.962456	0.706398	1	-1.76731	0.413389	1	0.004	0.002	0.009	0.015	0.314	1.591
76408	Abcc3	NM_029600	chr11	94204609	94254290	-	4969	1	Abcc3|1700019L09Rik|ABC31|MLP2|MOAT-D|MRP3|-|11|11 D|protein-coding	3.09909	0.0296627	0.562948	4.22367	0.000172234	0.00324332	4.37206	6.2e-06	4.11e-05	-2.36145	1	1	1.2997	0.663005	1	0	0.007	0.002	0.026	0.056	0.071
239273	Abcc4	NM_001163676	chr14	118881914	119105441	-	5472	1	Abcc4|D630049P08Rik|MOATB|MRP4|-|14|14 E4|protein-coding	-4.51194	0.0717638	0.942718	-2.15049	0.273455	0.926761	3.71972	1.18e-07	1.01e-06	-2.42604	0.208048	1	-0.991798	0.583862	1	0.002	0.007	0.013	0	0.002	0.211
27421	Abcc6	NM_018795	chr7	53231750	53285656	-	4925	1	Abcc6|Abcc1b|DCC|Dyscalc1|Mrp6|dyscalc|-|7 29.64 cM|7 B3|protein-coding	4.0205	0.186429	1	7.77143	6.65e-11	4.05e-09	11.0838	1.53e-60	1.86e-58	0	1	1	2.39775	1	1	0	0.002	0	0.01	0.14	1.53
19299	Abcd3	NM_008991	chr3	121461828	121518133	-	3374	1	Abcd3|AI313901|AU018866|AW146054|PMP68|PMP70|Pxmp1|-|3 52.94 cM|3 G-H1|protein-coding	0.153273	0.342853	1	0.664659	0.00948753	0.0911492	1.2939	1.22e-14	2.13e-13	0.14619	0.368394	1	0.153801	0.357996	1	13.098	13.169	11.416	13.051	18.17	32.31
11307	Abcg1	NM_009593	chr17	31194639	31254926	+	5801	1	Abcg1|AW413978|Abc8|White|-|17|17|protein-coding	-1.26015	0.0387239	0.66609	-1.09414	0.0993588	0.501001	2.45877	4.69e-09	4.76e-08	-1.32801	0.0154083	0.89283	-1.17124	0.0424646	1	0.053	0.06	0.124	0.054	0.064	0.817
27405	Abcg3	NM_030239	chr5	105364076	105411736	-	3016	1	Abcg3|Abcp2|Mxr2|-|5 E5|5 50.68 cM|protein-coding	1.25613	0.000463784	0.0236786	1.4097	0.000284051	0.00497493	2.16977	9.21e-12	1.27e-10	0.107838	0.805428	1	0.176126	0.696322	1	0.207	0.208	0.183	0.447	0.478	0.965
69812	Abhd11os	NR_026688	chr5	135487992	135489027	-	496	1	Abhd11os|2010001M06Rik|AI462243|Wbscr26|Wnscr26|-|5|5|ncRNA	0.107227	0.901428	1	0.681221	0.180472	0.733198	1.26513	0.000604311	0.00278388	0.171639	0.825152	1	0.478819	0.249902	1	0.807	0.974	0.687	0.762	1.028	1.928
68644	Abhd14a	NM_145919	chr9	106342382	106350009	-	1247	1	Abhd14a|1110013B16Rik|AW558221|Dorz1|-|9|9 F1|protein-coding	-0.24635	0.233593	1	-0.971666	0.00591756	0.0622482	-1.55543	1.8e-14	3.12e-13	-0.134248	0.452868	1	0.00141342	1	1	7.683	8.061	8.053	7.236	3.74	3.145
105501	Abhd4	NM_134076	chr14	54878907	54888844	+	2397	1	Abhd4|1110035H23Rik|AI429574|Abh4|-|14|14 C2|protein-coding	-0.202595	0.452975	1	0.25812	0.415847	1	1.02991	4.46e-07	3.51e-06	-0.121876	0.595813	1	-0.20301	0.378482	1	1.031	0.963	1.079	1.002	1.314	2.558
67469	Abhd5	NM_026179	chr9	122260734	122290641	+	3139	1	Abhd5|1300003D03Rik|2010002J10Rik|CDS|CGI-58|IECN5|NCIE2|-|9|9 F4|protein-coding	0.514775	0.0038004	0.124677	1.37472	6.77e-08	2.59e-06	1.76629	4.3e-23	1.3e-21	-0.167874	0.383568	1	-0.160196	0.397486	1	2.309	2.301	2.501	3.677	6.295	9.843
226251	Ablim1	NM_001103178	chr19	57107754	57193514	-	5903	1	Ablim1|2210411C18Rik|2610209L21Rik|4833406P10Rik|9330196J19Rik|AV079770|AW060987|AW215784|Limab1|mKIAA0059|-|19 D2|19 52.09 cM|protein-coding	-0.413792	0.0203882	0.44611	-2.52	5.5e-19	8.27e-17	-2.89282	2.14e-41	1.43e-39	0.615843	0.000238616	0.0474215	0.530772	0.00204499	0.189278	5.33	4.899	3.369	2.616	0.585	0.522
80283	Abtb1	NM_030251	chr6	88785908	88791929	-	1866	1	Abtb1|AI847549|BC003234|BPOZ|EF1ABP|-|6|6 D1|protein-coding	0.0882485	0.662574	1	0.895139	0.000340551	0.00580385	1.35615	2.38e-14	4.09e-13	0.25302	0.181881	1	0.167798	0.357269	1	4.836	4.441	3.912	4.371	7.153	11.606
99382	Abtb2	NM_178890	chr2	103406467	103558580	+	4539	1	Abtb2|AW539457|BPOZ-2|-|2|2 E2|protein-coding	-0.969261	1.54e-08	2.78e-06	-1.78061	6.52e-11	3.98e-09	-1.99594	1.67e-19	4.1e-18	0.0447597	0.783897	1	0.0927001	0.57711	1	4.746	4.825	4.441	2.337	1.312	1.283
110460	Acat2	NM_009338	chr17	13135908	13153591	-	2065	1	Acat2|AW742799|Tcp-1x|Tcp1-rs1|-|17 8.73 cM|17 A2-A3|protein-coding	-0.129302	0.422201	1	-0.0228253	0.929144	1	-1.05301	5.71e-11	7.24e-10	-0.076434	0.632905	1	-0.0422179	0.796517	1	82.408	84.239	83.138	79.524	81.655	46.649
224530	Acat3	NM_153151	chr17	13116825	13133262	-	1980	1	Acat3|ACTL|-|17 A1|17 8.72 cM|protein-coding	-0.0886576	0.580909	1	-0.195376	0.444847	1	-1.03788	8.87e-11	1.1e-09	-0.0470999	0.767998	1	-0.0137017	0.933401	1	81.507	83.438	80.61	79.259	70.282	45.704
11423	Ache	NM_009599	chr5	137729482	137735694	+	2202	1	Ache|-|-|5 G2|5 76.32 cM|protein-coding	0.951407	0.710988	1	1.74737	0.27799	0.934811	2.99061	0.0034833	0.0137271	-0.879466	1	1	1.21148	0.491862	1	0.005	0.027	0.011	0.022	0.035	0.109
104112	Acly	NM_001199296	chr11	100337666	100389314	-	4396	1	Acly|A730098H14Rik|AW538652|-|11|11 D|protein-coding	0.137754	0.418839	1	0.302482	0.29037	0.958218	1.04293	6.84e-10	7.65e-09	0.0455198	0.781088	1	0.0333805	0.843084	1	112.929	110.944	105.811	120.888	134.855	251.452
329910	Acot11	NM_025590	chr4	106417166	106472436	-	5650	1	Acot11|1110020M10Rik|2010309H15Rik|AW060409|BFIT|BFIT1|Thea|Them1|mKIAA0707|-|4|4 C7|protein-coding	1.14426	0.0666179	0.906087	2.87251	1.43e-07	5.14e-06	4.4139	6.52e-19	1.55e-17	0.179943	0.850883	1	0.725111	0.313839	1	0.027	0.038	0.023	0.052	0.176	0.582
66834	Acot13	NM_025790	chr13	24909824	24923358	-	681	1	Acot13|0610006O17Rik|Them2|-|13|13 A3.2|protein-coding	-0.274521	0.234707	1	0.0972609	0.777876	1	-1.01017	8.35e-05	0.000453655	-0.255929	0.263454	1	-0.145376	0.532853	1	20.215	21.712	22.731	19.751	22.127	13.402
171281	Acot3	NM_134246	chr12	85393101	85400514	+	2587	1	Acot3|AW108394|PTE-Ia|Pte2a|-|12|12 D1|protein-coding	-0.198769	0.622032	1	-1.01075	0.0404724	0.269372	-1.50344	0.000195848	0.000995048	-0.139252	0.72798	1	-0.205244	0.605556	1	0.277	0.261	0.295	0.267	0.138	0.12
217698	Acot5	NM_145444	chr12	85410275	85416969	+	1513	1	Acot5|BC016076|PTE-Ic|-|12|12 D1|protein-coding	-0.377517	0.123348	1	-1.41596	2.89e-05	0.00065791	-1.22576	6.38e-06	4.23e-05	-0.0522161	0.853642	1	-0.279266	0.261318	1	1.485	1.238	1.484	1.195	0.539	0.734
217700	Acot6	NM_172580	chr12	85441604	85450733	+	1817	1	Acot6|4632408A20Rik|A330054B07|BE688602|-|12|12 D1|protein-coding	-0.0220459	0.91543	1	-1.13344	3e-05	0.000676737	-1.36349	2.75e-11	3.62e-10	0.143218	0.40813	1	0.129582	0.493924	1	4.818	4.754	4.198	4.289	1.908	1.888
70025	Acot7	NM_133348	chr4	151552209	151645964	+	1483	1	Acot7|2410041A17Rik|Ach1|Act|Bach|CTE-IIa|Cte-II|Lach1|-|4|4 E2|protein-coding	0.0758921	0.63732	1	-0.640562	0.0120158	0.1092	-1.3432	2.2e-16	4.38e-15	-0.295035	0.0595973	1	-0.241849	0.132917	1	77.243	78.646	90.262	98.731	56.971	41.597
11432	Acp2	NM_007387	chr2	91043069	91054255	+	4640	1	Acp2|Acp-2|LAP|-|2 E1|2 50.54 cM|protein-coding	0.169342	0.332016	1	0.753449	0.00289142	0.0348872	1.23224	4.53e-13	7.04e-12	0.0196779	0.911774	1	0.119824	0.496904	1	2.881	3.038	2.746	3.196	4.632	7.45
11433	Acp5	NM_001102404	chr9	21931171	21936309	-	1400	1	Acp5|TRACP|TRAP|-|9 A3|9 8.38 cM|protein-coding	-0.430674	0.0161206	0.378196	-1.11775	8.89e-05	0.00180963	-1.52791	2.95e-14	5.01e-13	0.0225784	0.903876	1	-0.0555308	0.758626	1	14.028	13.219	13.133	10.169	5.641	5.304
66659	Acp6	NM_019800	chr3	96962700	96980499	+	1744	1	Acp6|5730559A09Rik|ACPL1|AU022842|mPACPL1|-|3|3 F2.1|protein-coding	0.362033	0.0289606	0.555322	1.77362	6.78e-13	5.39e-11	1.96493	1.32e-28	5.19e-27	-0.109458	0.505209	1	-0.12819	0.493267	1	8.663	8.194	8.944	11.861	30.474	40.809
54137	Acrbp	NM_016845	chr6	124999945	125013283	+	1901	1	Acrbp|OY-TES-1|sp32|-|6|6 F2|protein-coding	-0.247431	0.406694	1	0.362337	0.29233	0.961473	1.57724	5.44e-11	6.9e-10	-0.00399577	1	1	-0.168935	0.623436	1	0.996	0.897	0.958	0.814	1.13	2.909
14081	Acsl1	NM_007981	chr8	47556391	47621405	+	3874	1	Acsl1|Acas|Acas1|Acs|FACS|Facl2|LACS 1|LACS1|-|8|8 B2|protein-coding	0.64142	9.34e-05	0.00612156	0.837075	0.00136107	0.0187133	1.81662	4.29e-29	1.73e-27	0.0502099	0.76876	1	-0.0149056	0.931413	1	3.611	3.464	3.356	5.441	6.15	13.692
433256	Acsl5	NM_027976	chr19	55327859	55371118	+	3127	1	Acsl5|1700030F05Rik|ACS2|ACS5|Facl5|-|19|19 D2|protein-coding	-0.0516374	0.746075	1	-0.534977	0.0366087	0.250806	-1.41437	1.71e-18	3.96e-17	-0.0304875	0.845121	1	-0.0635564	0.691766	1	61.321	59.458	60.067	60.125	41.257	26.196
233799	Acsm2	NM_001177977	chr7	126697854	126744208	+	6601	1	Acsm2|AI315615|BC031140|-|7|7 F2|protein-coding	5.13e-15	1	1	3.99934	0.332273	1	5.51731	0.00312024	0.0124144	0	1	1	0	1	1	0	0	0	0	0.008	0.024
109711	Actn1	NM_134156	chr12	81268529	81361358	-	3716	1	Actn1|3110023F10Rik|Actn1a|-|12 C3|12 36.49 cM|protein-coding	0.531516	0.00238617	0.0872039	0.893065	0.00178351	0.0234874	1.77756	1.29e-18	3.02e-17	-0.230007	0.166992	1	-0.177779	0.294757	1	9.423	9.593	10.713	16.054	20.597	42.165
11477	Acvr1	NM_001110204	chr2	58298849	58419239	-	3283	1	Acvr1|ALK2|ActR-I|ActRIA|Acvr|Acvrlk2|Alk-2|Alk8|D330013D15Rik|SKR1|Tsk7L|-|2|2 C1.1|protein-coding	-1.33699	4.6e-10	1.13e-07	-2.25077	1.02e-12	7.9e-11	-4.09229	2.97e-43	2.15e-41	0.0746948	0.704595	1	0.0822868	0.675154	1	2.214	2.195	2.029	0.827	0.406	0.127
66204	Acyp1	NM_025421	chr12	86613348	86621385	-	643	1	Acyp1|1110039O14Rik|AI325944|-|12|12 D2|protein-coding	-0.282276	0.269739	1	0.431505	0.311868	0.98341	-1.03987	7.44e-05	0.00040827	-0.380972	0.124013	1	-0.412138	0.103279	1	20.238	19.276	24.733	21.2	28.609	14.281
11486	Ada	NM_007398	chr2	163552307	163575975	-	1687	1	Ada|-|-|2 84.44 cM|2 H3|protein-coding	-0.0332359	0.843594	1	-0.68995	0.00643601	0.0667386	-1.98209	2.7e-27	9.96e-26	-0.439241	0.00724591	0.586675	-0.390774	0.0199224	0.817532	8.474	8.664	10.988	11.336	6.914	3.243
11492	Adam19	NM_009616	chr11	45869486	45960849	+	6370	1	Adam19|AL024287|MADDAM|MTLNB|Mltnb|-|11 27.54 cM|11 A5-B1.1|protein-coding	-0.251249	0.325017	1	-1.92578	1.43e-07	5.15e-06	-1.55914	4.66e-08	4.21e-07	-2.47821	2.94e-14	4.42e-11	-2.69743	1.06e-15	2.56e-12	0.059	0.051	0.315	0.279	0.082	0.125
280668	Adam1a	NM_172126	chr5	121968613	121971704	-	3089	1	Adam1a|Adam1|Ftna|-|5 F|5 61.84 cM|protein-coding	0.344233	0.54214	1	0.316468	0.582341	1	1.40108	0.00330942	0.0130955	0.51481	0.308513	1	0.228547	0.675995	1	0.457	0.356	0.32	0.41	0.371	0.947
280667	Adam1b	NM_172125	chr5	121950106	121952989	-	2882	1	Adam1b|Adam1|Ftna|-|5|5 F|protein-coding	0.579525	0.18377	1	-0.158902	0.791701	1	1.35584	0.000567759	0.00262556	0.481262	0.279499	1	0.216286	0.703082	1	0.188	0.151	0.131	0.2	0.119	0.385
11495	Adam2	NM_009618	chr14	66646166	66696570	-	2528	1	Adam2|AI323749|Ftnb|Ph30-beta|-|14 D1|14 34.36 cM|protein-coding	0.0624723	0.810287	1	-1.41955	2.56e-06	7.23e-05	-1.09335	8.19e-07	6.26e-06	0.337784	0.127088	1	0.306372	0.252942	1	2.104	2.122	1.59	1.763	0.58	0.868
11496	Adam22	NM_001098225	chr5	8072347	8368160	-	9120	1	Adam22|2900022I03Rik|AI854032|MDC2|-|5 A1|5 3.39 cM|protein-coding	-0.283712	0.773159	1	0.215697	0.736806	1	3.30356	4.27e-23	1.29e-21	0.0667964	0.916651	1	-0.151715	1	1	0.035	0.029	0.032	0.027	0.036	0.372
11498	Adam4	NM_009620	chr12	82520536	82522865	-	2327	1	Adam4|AV274654|tMDCV|-|12|12 D1|protein-coding	0.353144	0.660456	1	0.689808	0.273999	0.927316	1.49537	0.00166049	0.0070003	0.407472	0.450296	1	0.481011	0.413144	1	0.131	0.13	0.096	0.127	0.153	0.314
11499	Adam5	NM_007401	chr8	25843456	25934841	-	2769	1	Adam5|tMDC II|tMDCII|-|8 A2|8 13.26 cM|protein-coding	5.13e-15	1	1	7.0282	1.09e-07	4.01e-06	7.4888	1.45e-11	1.95e-10	0	1	1	0	1	1	0	0	0	0	0.145	0.242
58860	Adamdec1	NM_021475	chr14	69181444	69200129	-	2396	1	Adamdec1|2210414L24Rik|AI574231|Dcsn|-|14|14 D2|protein-coding	5.13e-15	1	1	3.47153	0.356497	1	6.13099	6.59e-05	0.000364621	0	1	1	0	1	1	0	0	0	0	0.011	0.1
239337	Adamts12	NM_175501	chr15	10994545	11276622	+	6208	1	Adamts12|ADAMTS-12|AI605170|-|15|15 A1|protein-coding	-2.14692	1	1	0.0735047	1	1	3.73712	0.00174438	0.00731423	-2.3291	1	1	-2.30116	1	1	0	0	0.002	0	0.002	0.036
271127	Adamts16	NM_172053	chr13	70866686	70980688	-	4949	1	Adamts16|-|-|13 C1|13 35.97 cM|protein-coding	-2.14706	1	1	4.06681	0.000505185	0.00812044	10.4387	1.06e-109	3.44e-107	-2.32838	1	1	-2.30149	1	1	0	0	0.002	0	0.046	4.785
233332	Adamts17	NM_001033877	chr7	73984621	74297511	+	6004	1	Adamts17|AU023434|-|7|7 C|protein-coding	1.05227	0.296898	1	7.0958	1.91e-42	1.44e-39	7.09187	4.2e-61	5.2e-59	-4.42631	0.0776723	1	-4.39722	0.0808568	1	0	0	0.01	0.022	1.465	1.637
240913	Adamts4	NM_172845	chr1	173180553	173190053	+	3662	1	Adamts4|3830423K05|ADAM-TS4|ADAMTS-2|ADMP-1|mKIAA0688|-|1 H3|1 79.28 cM|protein-coding	0.49978	0.443025	1	0.895823	0.0992729	0.500779	3.26163	6.91e-09	6.92e-08	-0.514275	0.523594	1	-0.217382	0.880298	1	0.042	0.049	0.058	0.085	0.108	0.657
30806	Adamts8	NM_013906	chr9	30750148	30770443	+	3621	1	Adamts8|METH-2|METH2|-|9 A4|9 16.49 cM|protein-coding	5.13e-15	1	1	4.20412	0.171027	0.714079	5.51492	0.00240676	0.00977801	0	1	1	2.27961	1	1	0	0.003	0	0	0.014	0.043
77794	Adamtsl2	NM_029981	chr2	26934901	26964133	+	3221	1	Adamtsl2|A930008K15Rik|tcp-1|-|2|2 A3|protein-coding	-1.95771	0.000673187	0.0321193	-4.56517	1.99e-06	5.76e-05	-2.10272	0.00123999	0.00537361	0.800893	0.0326964	1	0.807603	0.0347601	1	0.212	0.21	0.117	0.031	0.004	0.031
269959	Adamtsl3	NM_001190374	chr7	89484204	89762958	+	7253	1	Adamtsl3|9230119C12Rik|C130057K09|mKIAA1233|-|7|7 D3|protein-coding	2.55873	1	1	5.43699	0.00947592	0.0911105	9.63745	8.37e-40	5.45e-38	0	1	1	0	1	1	0	0	0	0.002	0.019	0.38
231821	Adap1	NM_172723	chr5	139747830	139801418	-	2386	1	Adap1|4930431P11Rik|Centa1|GC1L|p42IP4|-|5|5 G2|protein-coding	-0.140599	0.484657	1	-1.62971	2.03e-06	5.88e-05	-1.474	5.47e-11	6.94e-10	-0.32241	0.0998408	1	-0.105338	0.685807	1	1.445	1.6	1.734	1.626	0.524	0.725
67426	Adck3	NM_023341	chr1	182095369	182126151	-	4009	1	Adck3|4632432J16Rik|AI462003|Cabc1|mKIAA0451|-|1|1 H4|protein-coding	0.170524	0.653671	1	1.43042	0.000904577	0.0132636	2.68893	3.75e-33	1.84e-31	0.204145	0.47709	1	0.16722	0.551325	1	0.352	0.327	0.286	0.345	0.861	2.229
432530	Adcy1	NM_009622	chr11	6963492	7078508	+	12236	1	Adcy1|AC1|D11Bwg1392e|I-AC|brl|mKIAA4070|-|11 4.72 cM|11 A2|protein-coding	-0.537122	0.0428988	0.698569	-3.76176	2.58e-16	3.06e-14	-3.16539	1.46e-19	3.6e-18	-0.493719	0.0571001	1	-0.366958	0.142533	1	0.119	0.127	0.161	0.117	0.011	0.021
104110	Adcy4	NM_080435	chr14	56387929	56402856	-	3367	1	Adcy4|mKIAA4004|-|14|14 D3|protein-coding	3.3301	0.534359	1	5.13e-15	1	1	6.78665	3.11e-07	2.51e-06	0	1	1	0	1	1	0	0	0	0.01	0	0.113
224129	Adcy5	NM_001012765	chr16	35155722	35304635	+	5037	1	Adcy5|AW121902|Ac5|-|16|16 B-5|protein-coding	-1.44962	0.39305	1	0.057208	1	1	4.27216	1.73e-24	5.67e-23	-1.90598	0.149612	1	-1.83583	0.155366	1	0.005	0.005	0.019	0.007	0.018	0.43
11518	Add1	NM_001024458	chr5	34916363	34974954	+	3900	1	Add1|AI256389|-|5 B2|5 17.9 cM|protein-coding	0.177699	0.276983	1	0.877818	0.00152106	0.0205258	1.17713	1.2e-12	1.81e-11	0.28626	0.071998	1	0.22854	0.167289	1	22.488	21.515	17.809	20.824	33.691	46.54
11519	Add2	NM_013458	chr6	86028042	86074403	+	7991	1	Add2|2900072M03Rik|add97|-|6 D1|6 37.55 cM|protein-coding	5.13e-15	1	1	8.00671	1.71e-08	7.17e-07	5.51046	0.00235062	0.00957895	2.30366	1	1	0	1	1	0.004	0	0	0	0.172	0.03
27360	Add3	NM_013758	chr19	53218487	53321816	+	4243	1	Add3|AI463285|R75380|-|19 D2|19 47.18 cM|protein-coding	-0.333826	0.0838919	1	-2.19082	1.44e-09	7.3e-08	-3.72089	1.02e-36	5.83e-35	-0.594674	0.00174863	0.216749	-0.669145	0.00196114	0.182789	0.937	0.854	1.355	1.128	0.273	0.119
230775	Adgrb2	NM_001290715	chr4	129669298	129699877	+	4965	1	Adgrb2|Bai2|-|4|4 D2.2|protein-coding	-3.02737	0.543752	1	1.8813	0.182846	0.738104	4.98099	9.85e-15	1.74e-13	-3.22302	0.53234	1	-3.20297	0.544594	1	0	0	0.005	0	0.018	0.195
210933	Adgrb3	NM_175642	chr1	25124321	25886552	-	5489	1	Adgrb3|A830096D10Rik|Bai3|-|1|1 A5|protein-coding	5.13e-15	1	1	3.11952	0.565735	1	5.63428	0.00119938	0.00520979	0	1	1	0	1	1	0	0	0	0	0.005	0.031
243277	Adgrd1	NM_001081342	chr5	129602625	129710474	+	5135	1	Adgrd1|E230012M21Rik|Gpr133|-|5|5 G1.3|protein-coding	-0.292642	0.33239	1	-4.03269	1.25e-13	1.12e-11	-2.71237	1.97e-12	2.92e-11	-1.50073	2.67e-06	0.00103952	-1.6147	2.59e-06	0.00086974	0.092	0.082	0.25	0.211	0.015	0.044
13733	Adgre1	NM_010130	chr17	57498109	57622952	+	3221	1	Adgre1|DD7A5-7|EGF-TM7|Emr1|F4/80|Gpf480|Ly71|TM7LN3|-|17 D|17 29.8 cM|protein-coding	0.428476	0.551727	1	5.13741	5.57e-32	2.23e-29	8.43002	3.7e-160	2.4e-157	-1.85007	0.0750215	1	-2.31658	0.0331424	1	0.011	0.008	0.04	0.056	1.456	16.442
52614	Adgre4	NM_139138	chr17	55889249	55992927	+	3472	1	Adgre4|D17Ertd479e|Egf-tm7|Emr4|Fire|Gpr127|-|17 C-D|17 28.98 cM|protein-coding	2.55709	1	1	5.08199	0.018024	0.148548	9.87879	8.11e-36	4.51e-34	2.30356	1	1	2.39832	1	1	0.003	0.003	0	0.005	0.029	0.936
26364	Adgre5	NM_011925	chr8	86247150	86265210	-	3231	1	Adgre5|AA409984|Cd97|TM7LN1|-|8 C2|8 40.22 cM|protein-coding	0.662802	0.000196239	0.0114538	0.0588675	0.833552	1	1.46258	5.04e-15	9.05e-14	0.0872599	0.661504	1	0.0412762	0.82164	1	5.977	5.829	5.536	8.928	5.922	17.248
104923	Adi1	NM_134052	chr12	29360072	29367039	+	1669	1	Adi1|AL024210|Fe-ARD|MTCBP-1|Ni-ARD|-|12|12 A2|protein-coding	-0.0965719	0.572139	1	-0.301857	0.219621	0.822492	-1.01739	1.33e-08	1.29e-07	-0.124102	0.462758	1	-0.139632	0.420596	1	11.569	11.378	12.015	11.675	9.624	6.943
11450	Adipoq	NM_009605	chr16	23146609	23158041	+	1227	1	Adipoq|30kDa|APN|Acdc|Acrp30|Ad|GBP28|adipo|apM1|-|16 B3-B4|16 13.96 cM|protein-coding	2.36905	0.281254	1	2.01856	0.472954	1	3.64145	0.00144528	0.00617862	2.01632	0.247042	1	1.41632	0.651482	1	0.048	0.03	0.01	0.067	0.052	0.172
11534	Adk	NM_134079	chr14	21871796	22267791	+	1769	1	Adk|2310026J05Rik|5033405D03Rik|AI255373|AI987814|Ak|-|14|14 A2-B|protein-coding	0.0451889	0.777095	1	-0.282735	0.242461	0.862111	-1.22261	1.21e-14	2.12e-13	0.040563	0.798894	1	0.0891693	0.597073	1	28.268	29.337	26.272	28.099	21.172	13.125
11535	Adm	NM_009627	chr7	117771183	117773333	+	1375	1	Adm|AM|-|7 F1|7 57.7 cM|protein-coding	-1.91119	0.0022175	0.0820373	-4.54277	5.21e-06	0.000137753	-1.57618	0.00589316	0.0221081	-0.315588	0.489869	1	-0.854433	0.100207	1	0.222	0.149	0.265	0.072	0.009	0.102
223780	Adm2	NM_182928	chr15	89153151	89155161	+	1292	1	Adm2|Am2|IMD|Imdn|-|15|15 E3|protein-coding	-0.453095	0.667986	1	-3.28716	0.00962354	0.0921614	-3.36301	0.00415345	0.0160628	-1.69303	0.0666382	1	-1.60788	0.128488	1	0.036	0.037	0.118	0.089	0.01	0.011
11540	Adora2a	NM_009630	chr10	74779622	74797537	+	2599	1	Adora2a|A2AAR|A2aR|AA2AR|-|10|10 B5.3|protein-coding	0.395869	0.704755	1	1.10968	0.082327	0.44289	1.98071	0.000170636	0.00087752	-0.183674	1	1	-2.44175	0.0208169	0.846493	0.05	0.009	0.054	0.076	0.113	0.254
11541	Adora2b	NM_007413	chr11	62062486	62079954	+	1840	1	Adora2b|A2BAR|A2BR|A2b|AA2BR|AI480866|AI605384|-|11|11 B2|protein-coding	3.4568	0.539945	1	7.01604	1.3e-07	4.73e-06	11.7433	3.73e-99	1.03e-96	0	1	1	0	1	1	0	0	0	0.018	0.208	6.458
11542	Adora3	NM_009631	chr3	105707339	105711846	+	2368	1	Adora3|A3AR|A3R|AA3R|ARA3|Gpcr2|-|3 F2.2|3 46.45 cM|protein-coding	2.17255	3.52e-14	1.63e-11	2.57588	1.83e-13	1.59e-11	2.60069	6.21e-20	1.58e-18	-0.330097	0.404904	1	-0.97167	0.0307296	1	0.268	0.163	0.328	1.548	1.879	2.292
234072	Adprhl1	NM_172750	chr8	13235662	13254162	-	1356	1	Adprhl1|Arh2|D330008N11Rik|-|8|8 A1.1|protein-coding	1.751	0.645327	1	0.0737617	1	1	3.9821	0.000272309	0.00134433	1.73586	0.436085	1	-2.30112	1	1	0.035	0	0.009	0.036	0.009	0.197
11551	Adra2a	NM_007417	chr19	54119672	54123472	+	3798	1	Adra2a|AW122659|Adra-2|Adra-2a|alpha(2A)AR|alpha2-C10|alpha2A|alpha2A-AR|-|19 D2|19 49.04 cM|protein-coding	0.938347	0.0737324	0.958254	1.28388	0.0259178	0.193976	2.72572	1.86e-12	2.77e-11	0.720006	0.168544	1	0.355156	0.543606	1	0.09	0.064	0.053	0.104	0.121	0.407
11555	Adrb2	NM_007420	chr18	62337367	62339635	-	2266	1	Adrb2|Adrb-2|Badm|Gpcr7|-|18 E1|18 35.1 cM|protein-coding	-2.00559	3.18e-20	3.47e-17	-2.31221	2.46e-13	2.12e-11	-3.36804	2.76e-41	1.85e-39	-0.196065	0.312928	1	-0.110616	0.561802	1	3.313	3.502	3.626	0.936	0.698	0.41
110355	Adrbk1	NM_001290818	chr19	4285999	4306222	-	3356	1	Adrbk1|Adrbk-1|Bark-1|GRK2|beta ARK|betaARK1|-|19 A|19 3.98 cM|protein-coding	0.56512	0.000413277	0.0214183	0.493612	0.0588648	0.351753	1.04412	1.12e-10	1.37e-09	-0.240023	0.122579	1	-0.178424	0.262149	1	33.587	34.574	38.173	58.516	54.289	91.244
11568	Aebp1	NM_001291857	chr11	5761869	5772251	+	4052	1	Aebp1|ACLP|-|11|11 A1|protein-coding	0.198648	0.677199	1	0.584591	0.184284	0.741778	-1.44987	0.000168185	0.000866431	0.379679	0.208875	1	0.405469	0.182332	1	0.267	0.268	0.197	0.239	0.267	0.083
68048	Aen	NM_026531	chr7	86040813	86053719	+	2574	1	Aen|2700083B06Rik|Isg20l1|-|7|7 D2|protein-coding	-0.255096	0.108419	1	-1.18869	2.04e-06	5.91e-05	-1.2639	2.19e-15	4.05e-14	-0.0214891	0.889751	1	-0.00388586	0.980941	1	32.084	32.032	31.225	27.318	13.515	15.132
140497	AF251705	NM_134158	chr11	114858083	114863194	-	1133	1	AF251705|CLM4|Cd300c|Cd300d|DIgR1|Igsf7|Lmir2|MAIR-II|-|11 E2|11 80.57 cM|protein-coding	5.13e-15	1	1	5.99929	0.00588096	0.0619445	7.91251	2.84e-14	4.83e-13	3.1449	0.522103	1	2.28039	1	1	0.021	0.011	0	0	0.135	0.732
16764	Aff3	NM_001290814	chr1	38232836	38684089	-	7227	1	Aff3|3222402O04Rik|A730046J16|LAF-4|Laf4|-|1 B|1 16.58 cM|protein-coding	0.138032	0.467708	1	-2.68241	3.09e-19	4.76e-17	-3.22566	2.52e-47	2.11e-45	0.307761	0.0926769	1	0.0801074	0.665192	1	7.826	6.472	6.156	7.03	0.981	0.753
93736	Aff4	NM_033565	chr11	53164269	53235332	+	10142	1	Aff4|AF5Q31|Alf4|Laf4l|MCEF|-|11|11 B1.3|protein-coding	0.160652	0.3944	1	0.502969	0.0973966	0.495972	1.23536	7.66e-11	9.55e-10	0.0953976	0.603571	1	0.0457924	0.806221	1	14.832	14.092	13.513	15.499	19.826	36.491
11576	Afp	NM_007423	chr5	90919740	90937933	+	2069	1	Afp|-|-|5 E1|5 44.77 cM|protein-coding	-0.0576905	1	1	1.14834	0.135458	0.61082	4.44459	1.17e-24	3.89e-23	0.583394	0.512938	1	-0.767628	0.579298	1	0.063	0.023	0.04	0.04	0.086	1.04
244071	Agbl1	NM_001199224	chr7	83374773	84269584	+	3345	1	Agbl1|Ccp4|D430020F16|EG244071|Nna1-l1|-|7|7 D2|protein-coding	5.13e-15	1	1	5.13e-15	1	1	5.06693	0.0138674	0.0476117	0	1	1	0	1	1	0	0	0	0	0	0.034
11596	Ager	NR_073175	chr17	34734795	34737882	+	1572	1	Ager|RAGE|-|17|17 B1|protein-coding	0.725355	0.0535418	0.793149	1.20866	0.00267549	0.0327085	2.29868	9.1e-15	1.61e-13	0.252867	0.542854	1	0.537855	0.157367	1	0.411	0.51	0.351	0.598	0.77	1.914
15463	Agfg1	NM_010472	chr1	82836035	82897576	+	7871	1	Agfg1|AU045498|C130049H11Rik|C85612|D730048C23Rik|Hrb|RAB|Rip|-|1|1 C5|protein-coding	-0.310655	0.0536249	0.793149	-1.17423	5.32e-06	0.00014027	-1.59371	1.07e-21	3e-20	-0.334756	0.0324728	1	-0.376898	0.0190968	0.802832	20.823	20.003	25.137	20.983	11.004	9.694
76850	Ago4	NM_153177	chr4	126166787	126210702	-	6501	1	Ago4|5730550L01Rik|AI481660|Eif2c4|-|4|4 D2.2|protein-coding	1.18339	0.428475	1	1.36413	0.323642	1	4.63815	3.15e-15	5.73e-14	-4.15897	0.17334	1	-4.13529	0.183679	1	0	0	0.007	0.018	0.022	0.223
11607	Agtr1a	NM_177322	chr13	30428225	30474736	+	2279	1	Agtr1a|1810074K20Rik|AG2S|AI551199|AT1|AT1a|AT2R1|AT2R1A|Agtr-1a|Agtr1|Angtr-1a|-|13 A3.2|13 13.19 cM|protein-coding	-1.16427	1.07e-10	2.97e-08	-2.92786	8.31e-26	2.08e-23	-3.605	1.41e-56	1.54e-54	-0.274077	0.0971692	1	-0.303898	0.0741273	1	8.601	8.349	10.047	4.675	1.303	0.95
11608	Agtr1b	NM_175086	chr3	20213395	20266099	-	2143	1	Agtr1b|AT1B|AT2R1B|Agtr-1b|Angtr-1b|-|3 A2|3 6.37 cM|protein-coding	-1.23886	0.0164174	0.382549	-2.38659	0.000370148	0.00622879	-7.1236	2.42e-09	2.55e-08	-0.660591	0.131319	1	-0.407802	0.434755	1	0.126	0.147	0.192	0.084	0.036	0
269378	Ahcy	NM_016661	chr2	154885048	154900233	-	2529	1	Ahcy|AA987153|AL024110|CuBP|SAHH|-|2 H1|2 76.94 cM|protein-coding	0.0274631	0.865604	1	-0.477346	0.064806	0.374703	-1.51267	8.19e-20	2.06e-18	-0.0351167	0.824109	1	-0.0166706	0.918852	1	125.268	126.29	122.751	130.686	87.059	50.128
11625	Ahsg	NM_013465	chr16	22892088	22899524	+	1505	1	Ahsg|-|-|16 B1|16 13.74 cM|protein-coding	-0.638686	0.456068	1	-3.67281	0.00132251	0.0182877	-6.08882	5.93e-05	0.000331256	-0.235421	0.872185	1	0.0631452	1	1	0.117	0.144	0.133	0.087	0.008	0
381524	AI427809	NR_033139	chr4	53274228	53283104	-	2031	1	AI427809|Gm1659|-|4|4 B2|ncRNA	2.55911	1	1	4.12678	0.171513	0.714387	5.95006	0.000208035	0.00105031	0	1	1	0	1	1	0	0	0	0.008	0.025	0.104
229694	AI504432	NR_033498	chr3	106842422	106857240	+	5542	1	AI504432|A230102G19|-|3|3 F2.3|ncRNA	-0.756991	0.00175429	0.0680411	-2.39238	5.39e-10	2.89e-08	-3.35797	2.89e-28	1.12e-26	0.0665122	0.769885	1	-0.166964	0.476645	1	1.127	0.942	1.048	0.629	0.182	0.117
226691	AI607873	NM_001204910	chr1	175653559	175671940	-	3473	1	AI607873|-|-|1|1 H3|protein-coding	0.482434	0.165745	1	0.338273	0.419531	1	1.23472	3.58e-05	0.000208254	0.00212473	1	1	0.164998	0.608713	1	0.2	0.219	0.193	0.279	0.239	0.526
11629	Aif1	NM_019467	chr17	35307937	35312946	-	865	1	Aif1|AI607846|AIF-1|D17H6S50E|G1|Iba1|-|17 B1|17 18.59 cM|protein-coding	-1.08412	0.480526	1	-0.200277	1	1	2.22832	0.00266768	0.0107472	-0.991853	0.534968	1	-2.29102	0.153046	1	0.041	0.014	0.082	0.038	0.074	0.455
108897	Aif1l	NM_145144	chr2	31805823	31828962	+	2945	1	Aif1l|2810003C17Rik|AI043124|C87647|Iba2|-|2|2 B|protein-coding	-0.144574	0.657901	1	0.717723	0.027559	0.203974	1.4248	5.13e-07	4.02e-06	-0.259831	0.385349	1	-0.162297	0.618983	1	0.348	0.361	0.399	0.374	0.632	1.251
72168	Aifm3	NM_175178	chr16	17489770	17507578	+	2651	1	Aifm3|2810401C16Rik|AI840249|Aifl|-|16|16 A3|protein-coding	0.332373	1	1	-2.24202	1	1	5.18595	3.28e-10	3.8e-09	0.805194	1	1	1.38579	0.650372	1	0.005	0.021	0.005	0.007	0	0.242
230806	Aim1l	NM_001162970	chr4	133624367	133648419	+	4739	1	Aim1l|-|-|4|4 D3|protein-coding	-0.523515	0.0363119	0.641582	-3.20461	1.38e-14	1.37e-12	-1.43511	4.77e-07	3.74e-06	1.10804	1.38e-06	0.000612381	1.25187	1.08e-06	0.000407306	1.177	1.226	0.528	0.378	0.056	0.226
231872	Aimp2	NM_001172146	chr5	144663573	144670708	-	1179	1	Aimp2|AA407136|AA407225|Aimp2(p38)|Jtv1|-|5|5 G2|protein-coding	-0.214361	0.268032	1	-0.661495	0.0220382	0.172511	-1.32638	2.02e-11	2.69e-10	-0.247409	0.194682	1	-0.198	0.308975	1	51.795	53.126	58.102	52.955	34.881	27.35
16475	Ajuba	NM_010590	chr14	55186306	55196498	-	3493	1	Ajuba|Jub|-|14|14 C3|protein-coding	0.435538	0.657092	1	0.455829	0.715254	1	1.56501	0.0133243	0.0459789	0.582285	0.45732	1	0.0354542	1	1	0.047	0.031	0.03	0.042	0.04	0.105
11637	Ak2	NM_016895	chr4	128670468	128688773	+	1772	1	Ak2|Ak-2|D4Ertd220e|-|4 D2.2|4 62.62 cM|protein-coding	-0.0993771	0.544606	1	-0.547971	0.0358493	0.24687	-1.18401	1.73e-12	2.57e-11	-0.117048	0.466463	1	-0.123161	0.454631	1	102.316	100.834	105.893	102.983	70.165	54.417
102216272	Ak6	NM_027592	chr13	101421298	101436370	+	983	1	Ak6|2810046E22Rik|4921516M08Rik|AK/ATPase|-|13 D1|protein-coding	-0.204435	0.239989	1	-0.378922	0.167907	0.707618	-1.18392	5.96e-11	7.54e-10	-0.191203	0.2641	1	-0.0927778	0.603134	1	64.588	69.138	70.034	63.732	51.005	36.237
83397	Akap12	NM_031185	chr10	5987070	6080212	-	6241	1	Akap12|AI317366|SSeCKS|Srcs5|Tsga12|-|10|10 A1|protein-coding	1.60484	1.78e-15	1.05e-12	3.21603	6.58e-17	8.2e-15	3.65312	1.12e-59	1.34e-57	-0.633554	0.003498	0.364141	-0.841309	0.000215416	0.033637	1.74	1.506	2.633	8.197	26.283	37.844
11641	Akap2	NM_001035532	chr4	57858120	57909856	+	6824	1	Akap2|AA959716|AI649048|Akap-2|Akap-kl|B230340M18Rik|Prka2|-|4|4 B3|protein-coding	-0.779953	9.65e-06	0.000872085	-2.2701	2.83e-16	3.33e-14	-2.79616	2.21e-34	1.14e-32	0.14486	0.392002	1	0.0827923	0.634143	1	22.675	21.596	19.842	12.004	4.147	3.265
238161	Akap6	NM_198111	chr12	53800370	54252002	+	10247	1	Akap6|AI482140|Akapalpha|Akapbeta|PRKA|-|12|12 C1|protein-coding	0.0664578	0.755547	1	-2.28108	2.22e-11	1.44e-09	-2.1772	3.95e-17	8.31e-16	-0.271562	0.213811	1	-0.312901	0.166753	1	0.59	0.559	0.693	0.741	0.143	0.176
432442	Akap7	NM_018747	chr10	24888896	25018969	-	3113	1	Akap7|6430401D08|AI662165|AKAP15|Akap18|BB170514|-|10|10 A4|protein-coding	-1.16908	7.62e-14	3.4e-11	-2.22448	1.57e-16	1.89e-14	-2.53618	9.3e-47	7.55e-45	0.0274941	0.858574	1	0.0589722	0.72416	1	15.164	15.577	14.273	6.597	2.858	2.855
622402	Akr1c12	NM_013777	chr13	4267418	4278645	-	1220	1	Akr1c12|AI266976|Akra|-|13|13 A1|protein-coding	0.0459288	1	1	2.85756	6.88e-14	6.36e-12	4.10435	1.25e-59	1.5e-57	-0.325485	0.442475	1	-0.343745	0.407877	1	0.386	0.376	0.462	0.499	3.145	9.314
27384	Akr1c13	NM_013778	chr13	4190433	4204849	+	1221	1	Akr1c13|mKIAA4014|-|13|13 A1|protein-coding	0.455141	0.0978661	1	2.84531	8.85e-14	8.12e-12	3.89241	2.58e-66	3.67e-64	-0.372412	0.298127	1	-0.491526	0.101962	1	0.829	0.752	1.02	1.441	6.661	17.737
105387	Akr1c14	NM_134072	chr13	4058837	4089668	+	2434	1	Akr1c14|9030611N15Rik|AW557061|-|13|13 A1|protein-coding	5.13e-15	1	1	5.13e-15	1	1	8.91859	4.68e-27	1.71e-25	0	1	1	0	1	1	0	0	0	0	0	0.688
17025	Alad	NM_008525	chr4	62167018	62181097	-	4522	1	Alad|ALADH|Lv|-|4 B3|4 33.17 cM|protein-coding	-0.0309047	0.850166	1	-0.244538	0.353334	1	-1.0224	5.29e-09	5.36e-08	-0.0489157	0.758327	1	0.0323576	0.843288	1	24.565	25.648	24.407	24.978	19.633	14.012
11655	Alas1	NM_020559	chr9	106135786	106150285	-	2689	1	Alas1|ALAS|ALAS-N|Alas-1|Alas-h|-|9|9 F1|protein-coding	0.382627	0.0156586	0.370614	0.505213	0.0339467	0.237164	1.53309	1.02e-21	2.87e-20	0.0728583	0.648499	1	-0.0192919	0.906355	1	7.316	6.837	6.675	9.026	9.339	22.441
56454	Aldh18a1	NM_019698	chr19	40624747	40662953	-	3506	1	Aldh18a1|2810433K04Rik|AI429789|Pycs|-|19|19 C3|protein-coding	0.0320875	0.849525	1	-0.984677	0.000380072	0.0063735	-1.82331	1.43e-24	4.73e-23	0.00131869	0.993759	1	0.109244	0.516478	1	47.38	50.739	45.776	48.518	23.693	14.905
11668	Aldh1a1	NM_013467	chr19	20676472	20717952	+	2017	1	Aldh1a1|Ahd-2|Ahd2|Aldh1|Aldh1a2|E1|Raldh1|-|19 B|19 13.91 cM|protein-coding	-0.913625	0.184724	1	1.96946	7.7e-08	2.91e-06	4.62279	4.77e-70	7.8e-68	0.572088	0.128552	1	0.506712	0.15849	1	0.379	0.353	0.245	0.147	0.935	7.063
26358	Aldh1a7	NM_011921	chr19	20767443	20802046	-	2045	1	Aldh1a7|AI987940|Ahd2-like|Aldh-pb|Aldh1a4|Aldhpb|-|19 B|19 13.95 cM|protein-coding	0.988128	0.00249312	0.0901535	4.49241	2.57e-43	1.99e-40	7.74251	1.18e-213	1.42e-210	0.918253	0.00390281	0.399365	0.470561	0.160315	1	0.621	0.443	0.316	0.659	7.1	79.06
72535	Aldh1b1	NM_028270	chr4	45811894	45817480	+	2298	1	Aldh1b1|2700007F14Rik|-|4|4 B2|protein-coding	-0.654431	9.99e-05	0.00649579	-2.50365	5.76e-20	9.62e-18	-3.56273	4.58e-54	4.69e-52	-0.144214	0.358302	1	-0.109434	0.504741	1	189.85	193.882	202.024	134.521	35.371	19.723
67689	Aldh3b1	NM_026316	chr19	3913491	3929716	-	1820	1	Aldh3b1|1700001N19Rik|ALDH4|ALDH7|-|19|19 A|protein-coding	-0.0251522	0.880064	1	-0.913789	0.000221168	0.0040139	-1.31087	3.54e-10	4.08e-09	-0.361637	0.0261195	1	-0.310237	0.0621001	1	18.082	18.545	22.12	22.713	11.522	10.408
621603	Aldh3b2	NM_001177438	chr19	3972328	3981665	+	2149	1	Aldh3b2|AI848594|C130048D07Rik|-|19|19 A|protein-coding	-0.0735636	0.795361	1	-1.23796	0.000300117	0.00521831	-1.34842	3.09e-06	2.14e-05	-0.279352	0.241757	1	-0.374088	0.12725	1	1.615	1.501	1.86	1.821	0.813	0.857
104776	Aldh6a1	NM_134042	chr12	85771671	85791974	-	3402	1	Aldh6a1|1110038I05Rik|Mmsdh|-|12 D1|12 39.21 cM|protein-coding	0.310333	0.133628	1	1.04471	0.000347677	0.00591259	1.57327	2.7e-13	4.28e-12	0.265157	0.209142	1	0.113168	0.640553	1	1.543	1.399	1.244	1.585	2.586	4.274
11682	Alk	NM_007439	chr17	72218328	72953647	-	5887	1	Alk|CD246|Tcrz|-|17 E1.3|17 43.77 cM|protein-coding	1.45433	0.000361799	0.019298	2.59042	2.24e-10	1.26e-08	2.67254	1.13e-15	2.15e-14	-0.944581	0.09268	1	-0.441429	0.431886	1	0.028	0.039	0.052	0.148	0.314	0.389
231642	Alkbh2	NM_175016	chr5	114573943	114578185	-	1059	1	Alkbh2|9530023G02|AU016977|Abh2|mABH2|-|5|5 F|protein-coding	-0.196013	0.333828	1	-0.679057	0.0209115	0.166647	-1.73187	1.6e-13	2.57e-12	-0.145769	0.466768	1	-0.100203	0.642965	1	4.044	4.061	4.273	3.882	2.588	1.501
236266	Alms1	NM_145223	chr6	85537525	85652745	+	9959	1	Alms1|bbb|-|6|6 C3|protein-coding	-0.286275	0.121669	1	-0.806615	0.00339998	0.0398111	-1.36168	1.09e-12	1.66e-11	0.101835	0.56895	1	-0.0822595	0.665032	1	4.299	3.654	3.896	3.289	2.268	1.738
623273	Alms1-ps2	NR_040440	chr6	85742111	85754051	+	1162	1	Alms1-ps2|Gm6413|-|6 C3|6|pseudo	-0.229014	0.334647	1	-0.73562	0.0196277	0.159079	-1.58815	1.79e-08	1.71e-07	0.0525336	0.819159	1	-0.0301325	0.94234	1	3.635	3.275	3.399	2.972	2.019	1.295
11686	Alox12b	NM_009659	chr11	68970574	68983293	+	2330	1	Alox12b|12R-LOX|Aloxe2|e-LOX2|-|11 B3|11 42.38 cM|protein-coding	4.61299	0.0413561	0.688151	6.81929	8.24e-07	2.58e-05	7.27753	4.24e-10	4.86e-09	0	1	1	0	1	1	0	0	0	0.035	0.148	0.229
11685	Alox12e	NM_145684	chr11	70129115	70136020	-	2293	1	Alox12e|8-LOX|AW259591|Alox12-ps1|Alox12-ps2|Aloxe|e-LOX1|-|11 B3|11 42.99 cM|protein-coding	4.85991	0.0219906	0.464633	7.74609	1.53e-11	1.02e-09	10.7015	2.39e-66	3.46e-64	0	1	1	0	1	1	0	0	0	0.043	0.284	2.514
11687	Alox15	NM_009660	chr11	70157649	70165533	-	2398	1	Alox15|12-LO|12/15-LO|15-LOX|Alox12l|L-12LO|-|11 B3|11 42.99 cM|protein-coding	1.2264	1.75e-05	0.00144841	2.06137	6.56e-10	3.48e-08	3.96605	1.19e-63	1.62e-61	-0.830615	0.0263535	1	-1.24029	0.00118211	0.12763	0.177	0.131	0.304	0.741	1.26	5.53
11689	Alox5	NM_009662	chr6	116360089	116411196	-	2811	1	Alox5|5-LO|5-LOX|5LO|5LX|AI850497|F730011J02|-|6 F1|6 53.79 cM|protein-coding	5.13e-15	1	1	5.09947	0.0292468	0.213075	8.89443	1.03e-26	3.7e-25	0	1	1	0	1	1	0	0	0	0	0.032	0.585
11690	Alox5ap	NM_009663	chr5	150076580	150099729	+	1007	1	Alox5ap|Flap|-|5|5 G3|protein-coding	1.44845	1.27e-10	3.42e-08	4.42623	2.14e-43	1.71e-40	4.47631	3.53e-87	8.33e-85	-2.58357	6.8e-17	1.64e-13	-2.53953	1.64e-13	2.81e-10	0.958	0.924	5.428	15.463	115.846	142.512
116904	Alpk3	NM_054085	chr7	88202486	88250498	+	6353	1	Alpk3|AW319487|D330016D04|MAK|Midori|mKIAA1330|-|7|7 D3|protein-coding	0.0905594	1	1	1.59381	0.0107252	0.100197	2.20249	2.07e-08	1.96e-07	-0.969204	0.17208	1	-0.543752	0.423861	1	0.019	0.025	0.035	0.039	0.116	0.19
11647	Alpl	NM_007431	chr4	137297646	137352299	-	2510	1	Alpl|APTNAP|Akp-2|Akp2|TNAP|TNSALP|-|4 D3|4 70.02 cM|protein-coding	-0.796617	5.16e-06	0.000498662	-2.48646	1.2e-15	1.31e-13	-2.9109	8.76e-37	5.05e-35	-0.454287	0.00806397	0.624865	-0.435853	0.0128099	0.638621	26.11	25.854	34.012	20.531	5.592	5.289
74018	Als2	NM_001159948	chr1	59219600	59293937	-	6645	1	Als2|3222402C23Rik|9430073A21Rik|Als2cr6|Alsin|mKIAA1563|-|1|1 C1.3|protein-coding	-0.483596	0.398711	1	0.923953	0.0739757	0.410735	1.92126	2.96e-07	2.4e-06	-0.179647	0.821796	1	-1.85772	0.00441042	0.315958	0.042	0.013	0.047	0.036	0.089	0.208
108812	Als2cr12	NM_175370	chr1	58714965	58752833	-	1558	1	Als2cr12|4933405P16Rik|4933425F06Rik|-|1|1 C2|protein-coding	-0.726522	0.340655	1	-1.03298	0.20895	0.799335	2.21412	1.18e-07	1.01e-06	-2.03727	0.0136587	0.841801	-1.7025	0.0334481	1	0.038	0.047	0.151	0.095	0.074	0.83
11695	Alx4	NM_007442	chr2	93482591	93521496	+	5197	1	Alx4|lst|-|2 E1|2 51.62 cM|protein-coding	-2.14695	1	1	1.39942	0.687543	1	4.43263	3.73e-06	2.56e-05	-0.0369986	1	1	-2.30131	1	1	0.002	0	0.002	0	0.007	0.07
17117	Amacr	NM_008537	chr15	10911511	10926379	+	2568	1	Amacr|Macr1|-|15|15 B1|protein-coding	-0.119386	0.530468	1	-0.483768	0.0813748	0.438946	-1.11558	3.33e-08	3.06e-07	0.0657048	0.725591	1	0.141297	0.461684	1	2.607	2.724	2.398	2.286	1.638	1.281
228361	Ambra1	NM_172669	chr2	91570295	91759006	+	5270	1	Ambra1|2310079H06Rik|A130023A14|AA474864|AV021921|D030051N19Rik|mKIAA1736|-|2|2 E1|protein-coding	0.495117	0.00564485	0.171391	0.657019	0.0198877	0.160483	1.46758	1.75e-15	3.28e-14	0.15971	0.357919	1	0.188276	0.285659	1	10.454	10.523	9.091	13.254	14.728	28.899
11702	Amd1	NM_009665	chr10	40007264	40021994	-	3196	1	Amd1|AdoMetDC|Amd-1|SAMDC|SAMDC 1|adoMetDC1|-|10 21.85 cM|10 B2|protein-coding	-0.321258	0.0447407	0.713921	-0.810405	0.00156335	0.0210022	-1.28765	1.49e-15	2.81e-14	-0.00879807	0.956209	1	-0.020303	0.899765	1	52.038	51.288	50.128	41.535	28.464	23.892
100041585	Amd2	NM_007444	chr10	40007271	40021992	-	3187	1	Amd2|AdoMetDC|Amd1|Amd3|ENSMUSG00000063953|-|10|10 B1|protein-coding	-0.321336	0.0447261	0.713921	-0.808843	0.00158982	0.021322	-1.28827	1.43e-15	2.69e-14	-0.00914817	0.954456	1	-0.0202038	0.900253	1	52.059	51.33	50.159	41.554	28.504	23.898
71761	Amdhd1	NM_027908	chr10	92986083	93002778	-	2410	1	Amdhd1|1300019J08Rik|-|10|10 C3|protein-coding	0.372062	1	1	3.65486	8.37e-07	2.61e-05	3.10851	5.42e-05	0.000304935	-0.578526	1	1	-3.69164	0.281931	1	0.01	0	0.015	0.02	0.201	0.158
211383	Amer3	NM_213727	chr1	34636538	34647789	+	4352	1	Amer3|9430069J07Rik|Fam123c|-|1|1 B|protein-coding	5.13e-15	1	1	5.13e-15	1	1	6.5582	2.38e-06	1.69e-05	0	1	1	0	1	1	0	0	0	0	0	0.074
320844	Amigo3	NM_177275	chr9	107955490	107958032	+	2540	1	Amigo3|E430002N15Rik|ali3|mKIAA1851|-|9|9 F2|protein-coding	0.613357	0.0315624	0.584732	0.651923	0.100769	0.505361	1.30952	3.98e-06	2.72e-05	0.331443	0.286382	1	0.259907	0.380252	1	1.005	0.937	0.782	1.217	1.255	2.22
232566	Amn1	NM_001113424	chr6	149106099	149137234	-	1018	1	Amn1|5830467E07Rik|A230083D09|C730024G19Rik|-|6|6 G3|protein-coding	-0.0159364	0.9501	1	0.983479	0.00979702	0.0935991	1.19878	3.07e-06	2.13e-05	-0.298059	0.279251	1	-0.140683	0.649095	1	1.965	2.112	2.286	2.374	4.208	6.189
75723	Amotl1	NM_001081395	chr9	14346411	14419444	-	8935	1	Amotl1|2310010G08Rik|2310067L22Rik|4932416D09Rik|JEAP|mFLJ00155|-|9|9 A3|protein-coding	-0.182477	0.329269	1	-1.1444	2.99e-05	0.000675227	-1.5301	1.87e-11	2.51e-10	0.114283	0.514363	1	0.0929347	0.633828	1	1.988	1.973	1.779	1.634	0.812	0.711
229665	Ampd1	NM_001033303	chr3	102877937	102903643	+	2324	1	Ampd1|AI553520|Ampd-1|-|3 F2.2|3 45.25 cM|protein-coding	-0.713804	0.149606	1	-2.16178	0.000252997	0.00449323	-1.83476	0.0002872	0.0014106	0.622463	0.07055	1	0.0950961	0.862149	1	0.365	0.25	0.228	0.142	0.049	0.073
109674	Ampd2	NM_028779	chr3	107876980	107889584	-	3669	1	Ampd2|1200014F01Rik|AI552571|Ampd-2|-|3 F2.3|3 46.83 cM|protein-coding	-0.174631	0.322156	1	-1.12527	2.12e-05	0.000498644	-1.18435	1.17e-11	1.6e-10	0.0991792	0.556941	1	0.0587821	0.728291	1	29.1	27.664	26.343	24.279	12.147	13.391
11717	Ampd3	NM_009667	chr7	117916118	117955922	+	4080	1	Ampd3|-|-|7 57.85 cM|7 E2-E3|protein-coding	0.163998	0.48626	1	0.566145	0.0865659	0.458067	1.74672	1.74e-15	3.25e-14	-0.145116	0.596322	1	-0.484463	0.0564853	1	0.615	0.473	0.656	0.772	1.004	2.546
71421	Amtn	NM_027793	chr5	88805133	88814941	+	1011	1	Amtn|5430427O21Rik|-|5|5 E2|protein-coding	2.55819	1	1	2.30969	1	1	5.37144	0.00679757	0.0252004	0	1	1	0	1	1	0	0	0	0.016	0.013	0.139
11722	Amy1	NM_001110505	chr3	113258870	113280668	-	1650	1	Amy1|Amy-1|Amy1a|C030014B17Rik|-|3 F3|3 49.35 cM|protein-coding	1.35279	0.204501	1	0.0324732	1	1	2.99459	0.000144075	0.000750828	1.73256	0.0763639	1	1.14722	0.379374	1	0.078	0.051	0.021	0.06	0.023	0.213
26360	Angptl2	NM_011923	chr2	33071481	33103234	+	3437	1	Angptl2|AI593246|AW260363|Arp2|-|2|2 B|protein-coding	-0.513483	0.00245972	0.0892139	-1.66121	4.17e-11	2.64e-09	-2.50675	1.63e-42	1.15e-40	-0.393473	0.0125076	0.807604	-0.430486	0.00872586	0.495799	7.668	7.483	9.695	7.143	3.075	1.972
57875	Angptl4	NM_020581	chr17	33911845	33918520	-	1894	1	Angptl4|Arp4|Bk89|Fiaf|Hfarp|Ng27|Pgar|Pgarg|Pp1158|-|17|17 B1|protein-coding	-0.579601	0.000723765	0.0339929	-1.57159	3.14e-09	1.53e-07	-2.07047	1.23e-28	4.86e-27	-0.0465427	0.772353	1	-0.115934	0.481791	1	17.693	16.507	17.42	12.337	5.573	4.848
70726	Angptl6	NM_145154	chr9	20678253	20684154	-	1556	1	Angptl6|6330404E11Rik|AGF|ARP3|Arp5|-|9|9 A3|protein-coding	-0.228559	0.398464	1	-0.427626	0.244034	0.865275	-1.08108	0.000396585	0.00189182	-0.269788	0.281002	1	0.0962457	0.729101	1	0.983	1.242	1.133	1.014	0.803	0.624
11732	Ank	NM_020332	chr15	27396432	27524662	+	3482	1	Ank|Ankh|D15Ertd221e|ank|mKIAA1581|-|15 B1|15 10.23 cM|protein-coding	0.974305	0.0683808	0.91812	1.19334	0.121108	0.567366	1.87771	2.24e-05	0.000135554	0.288629	0.65128	1	-0.713403	0.352232	1	0.064	0.031	0.051	0.104	0.099	0.218
11733	Ank1	NM_001277284	chr8	24145571	24260969	+	7994	1	Ank1|Ank-1|nb|pale|-|8 A2|8 11.42 cM|protein-coding	-0.27741	0.199158	1	-1.77386	6.12e-09	2.83e-07	-1.32817	4e-08	3.65e-07	-0.468476	0.0250284	1	-0.576577	0.00817271	0.471293	0.771	0.695	1.037	0.891	0.3	0.473
11735	Ank3	NM_146005	chr10	68996456	69490184	+	9980	1	Ank3|2900054D09Rik|AI314020|Ank-3|AnkG|Ankyrin-3|Ankyrin-G|-|10 B5.3|10 36.1 cM|protein-coding	-0.0389799	0.864834	1	0.82866	0.0231889	0.17844	1.85903	2.63e-17	5.61e-16	0.406507	0.0513132	1	0.405191	0.0553452	1	2.401	2.344	1.741	1.772	3.363	7.235
271144	Ankdd1b	NM_001042714	chr13	97186089	97241115	-	3299	1	Ankdd1b|9330128J19Rik|-|13|13 D1|protein-coding	0.474614	0.0744925	0.964112	0.621878	0.0764912	0.420046	1.29804	3.2e-06	2.22e-05	0.254176	0.36123	1	0.152238	0.594219	1	0.592	0.546	0.481	0.688	0.696	1.364
241158	Ankmy1	NM_172850	chr1	94766706	94799483	-	3223	1	Ankmy1|4930483I10Rik|ZMYND13|-|1|1 D|protein-coding	0.266937	0.762242	1	-0.0686728	1	1	1.87315	0.000356727	0.00171942	-0.580959	0.553918	1	-0.511998	0.650384	1	0.037	0.037	0.055	0.066	0.051	0.231
68423	Ankrd13d	NM_026720	chr19	4270180	4283137	-	2124	1	Ankrd13d|0710001P18Rik|AI430801|-|19|19 A|protein-coding	0.580243	0.0235675	0.480685	0.0197999	0.972082	1	2.07137	9.06e-18	1.99e-16	-0.433519	0.117396	1	-0.214071	0.451659	1	0.582	0.671	0.758	1.184	0.744	3.681
52024	Ankrd22	NM_024204	chr19	34197039	34240531	-	1746	1	Ankrd22|5430429D21Rik|D19Ertd675e|-|19 C1|19 29.33 cM|protein-coding	3.25381	0.0185397	0.415025	6.97052	1.38e-24	3.27e-22	9.2429	1.63e-70	2.68e-68	-2.3288	1	1	0.0758277	1	1	0	0.007	0.007	0.085	1.037	5.952
245886	Ankrd27	NM_145633	chr7	36371266	36424256	+	4261	1	Ankrd27|AA408090|BC016493|D330003H11Rik|Varp|-|7|7 B2|protein-coding	-0.323517	0.0621315	0.870469	-1.26769	2.89e-06	8.12e-05	-1.60063	4.33e-20	1.11e-18	0.17277	0.289244	1	0.168092	0.325476	1	36.522	36.362	31.334	26.133	13.2	11.908
73845	Ankrd42	NM_028665	chr7	99732693	99785652	-	2768	1	Ankrd42|4931426M20|4933417L02Rik|Ikbn|-|7|7 E2|protein-coding	-0.567105	0.447583	1	0.6361	0.292157	0.961473	1.70294	0.000443274	0.00208926	-0.141861	1	1	0.00385951	1	1	0.064	0.07	0.068	0.048	0.106	0.259
99696	Ankrd50	NM_001167883	chr3	38348183	38383738	-	4909	1	Ankrd50|AI662170|E430012K20Rik|mKIAA1223|mKIAA3019|-|3|3 B|protein-coding	0.35682	0.112668	1	1.43313	4.29e-06	0.000116194	1.82893	3.11e-18	7.06e-17	0.532307	0.0137875	0.843437	0.359392	0.105177	1	3.226	2.793	2.177	2.814	6.066	8.849
140577	Ankrd6	NM_001012451	chr4	32891010	33037801	-	4426	1	Ankrd6|-|-|4|4 A5|protein-coding	-0.181837	0.508351	1	-0.608252	0.103677	0.513518	-1.1754	0.000210784	0.00106329	-0.20318	0.465474	1	0.0166546	1	1	0.308	0.358	0.343	0.316	0.213	0.175
383787	Ankrd63	NM_001081971	chr2	118524839	118529699	-	4858	1	Ankrd63|Gm1337|-|2|2 E5|protein-coding	5.13e-15	1	1	3.76452	0.30241	0.977907	7.61508	1.96e-12	2.91e-11	0	1	1	0	1	1	0	0	0	0	0.008	0.139
74251	Ankrd9	NM_175207	chr12	112213563	112217231	-	2553	1	Ankrd9|2500003O20Rik|-|12|12 F1|protein-coding	-0.292144	0.173572	1	-0.524405	0.0711793	0.400386	-1.05163	2.14e-06	1.53e-05	0.0108152	0.97457	1	0.131594	0.534983	1	2.148	2.271	2.03	1.758	1.373	1.146
101772	Ano1	NM_178642	chr7	151774454	151924497	-	4573	1	Ano1|Tmem16a|-|7|7 F5|protein-coding	-4.45461	0.0757008	0.971939	3.79314	1.71e-11	1.12e-09	7.18607	1.76e-85	3.99e-83	-0.997821	0.533553	1	-0.263304	1	1	0.008	0.013	0.015	0	0.22	2.725
320091	Ano4	NR_102339	chr10	88411739	88720535	-	4090	1	Ano4|A330096O15Rik|Gm65|Tmem16d|-|10|10 C1|protein-coding	-5.02717	0.0121552	0.30639	-1.07814	0.228744	0.837321	1.96179	0.000953851	0.00422962	-1.18728	0.304257	1	-0.86644	0.318852	1	0.012	0.015	0.026	0	0.012	0.12
105722	Ano6	NM_001253813	chr15	95621274	95805903	+	5688	1	Ano6|2900059G15Rik|AA407480|AW554778|F730003B03Rik|Tmem16f|-|15|15 F1|protein-coding	-0.0203508	0.911051	1	-0.869127	0.0027854	0.0337603	-1.01499	1.84e-08	1.74e-07	0.152104	0.375388	1	0.11475	0.514777	1	22.94	22.181	20.036	20.52	11.348	11.401
382014	Ano8	NM_001164679	chr8	73999918	74009966	-	3738	1	Ano8|BC053460|Tmem16h|-|8|8 B3.3|protein-coding	0.152414	0.361024	1	0.791107	0.00114774	0.0162447	1.37744	2.15e-16	4.29e-15	0.111443	0.508411	1	0.303113	0.0749714	1	5.593	6.208	5.006	5.723	8.437	15.011
67628	Anp32b	NM_130889	chr4	46463989	46485395	+	1358	1	Anp32b|2410015B15Rik|PAL31|PHAPI2a|Ssp29|-|4|4 B2|protein-coding	-0.0912595	0.568387	1	-0.464194	0.0716303	0.402358	-1.08276	1.83e-11	2.46e-10	0.0137564	0.931036	1	-0.0346395	0.830989	1	492.841	474.132	467.454	457.088	334.068	256.794
66471	Anp32e	NM_023210	chr3	95733180	95751310	+	3251	1	Anp32e|2810018A15Rik|AI047746|AI326868|CPD1|LANP-L|LANPL|mLANP-L|-|3|3 F2.1|protein-coding	-0.091223	0.567411	1	-0.454815	0.0781274	0.426113	-1.02727	1.61e-10	1.94e-09	-0.0209833	0.895153	1	-0.0265028	0.870467	1	179.586	178.166	174.623	169.792	126.434	99.598
16790	Anpep	NM_008486	chr7	86966689	86987238	-	3401	1	Anpep|AP-M|AP-N|Apn|Cd13|P150|-|7|7 D3|protein-coding	1.22515	0.0415084	0.688419	5.51449	1.45e-34	6.7e-32	7.66707	5.27e-136	2.22e-133	0.449471	0.512545	1	0.867735	0.159704	1	0.059	0.078	0.041	0.102	1.945	9.948
71914	Antxr2	NM_133738	chr5	98313707	98459981	-	3732	1	Antxr2|2310046B19Rik|AW561899|CMG-2|CMG2|cI-35|-|5|5 E3|protein-coding	1.01163	6.3e-08	9.66e-06	0.791095	0.00282447	0.0341822	1.76905	6.54e-20	1.66e-18	-0.26836	0.152821	1	-0.293668	0.126571	1	2.623	2.554	3.061	6.428	5.322	11.994
16952	Anxa1	NM_010730	chr19	20447924	20465161	-	1380	1	Anxa1|Anx-1|Anx-A1|C430014K04Rik|Lpc-1|Lpc1|-|19 B|19 13.83 cM|protein-coding	1.64037	4.78e-06	0.00046505	6.02147	1.55e-62	4.13e-59	8.86396	9.98e-248	2.4e-244	0.442213	0.301465	1	0.982528	0.0120737	0.616426	0.35	0.49	0.247	0.798	15.473	134.675
12306	Anxa2	NM_007585	chr9	69301490	69339592	+	1359	1	Anxa2|AW215814|Cal1h|-|9 C|9 38.58 cM|protein-coding	-0.0289553	0.927992	1	-0.256536	0.467051	1	-1.36917	1.71e-05	0.000105723	-0.125353	0.66936	1	0.0911953	0.764963	1	2.26	2.587	2.327	2.408	1.923	1.066
11745	Anxa3	NM_013470	chr5	97222404	97274987	+	1582	1	Anxa3|Anx3|-|5 E3|5 47.29 cM|protein-coding	4.29082	0.146681	1	8.85394	1.78e-15	1.91e-13	10.8662	1.66e-54	1.72e-52	2.29492	1	1	3.29899	0.541665	1	0.007	0.015	0	0.042	0.806	4.098
27052	Aoah	NM_012054	chr13	20885982	21116123	+	2900	1	Aoah|4930433E13Rik|-|13|13 A2|protein-coding	0.332222	1	1	5.08958	8.25e-08	3.11e-06	6.11254	1.07e-18	2.52e-17	-2.32909	1	1	0.0751442	1	1	0	0.004	0.004	0.006	0.176	0.407
11761	Aox1	NM_009676	chr1	58086813	58163254	+	4345	1	Aox1|AI196512|AI255253|Ao|Aox-1|Aox-2|Aox2|Moro|Ro|-|1 28.86 cM|1 C1-C2|protein-coding	0.344198	0.637742	1	0.0711458	1	1	2.09041	1.9e-07	1.58e-06	0.416433	0.490565	1	-0.0428544	1	1	0.068	0.047	0.049	0.064	0.05	0.243
213043	Aox2	NM_001008419	chr1	58335170	58436108	+	4738	1	Aox2|Aoh3|Aox3l1|-|1 C1.3|1 29.0 cM|protein-coding	-1.37416	0.206438	1	-3.05865	0.0247284	0.187152	-3.13153	0.0117803	0.0411985	-0.687729	0.513406	1	-0.591422	0.679872	1	0.017	0.018	0.027	0.01	0.003	0.003
11776	Ap3d1	NM_007460	chr10	80169723	80204956	-	4697	1	Ap3d1|AA407035|Ap3d|Bolvr|mBLVR1|mh|mocha|-|10 C1|10 39.72 cM|protein-coding	0.213621	0.229585	1	0.786208	0.0082858	0.0819616	1.17772	2.06e-11	2.74e-10	0.143937	0.395893	1	0.147027	0.403649	1	15.624	15.629	13.719	16.527	24.693	35.715
64933	Ap3m2	NM_001122820	chr8	23897826	23916126	-	3456	1	Ap3m2|5830445E16Rik|AP-3B|-|8|8 A2|protein-coding	0.304422	0.0953763	1	0.836158	0.00155972	0.0209769	1.38877	1.14e-13	1.85e-12	-0.113751	0.552452	1	-0.135885	0.474359	1	1.539	1.474	1.593	2.054	2.873	4.873
11784	Apba2	NM_001291166	chr7	71647024	71898762	+	3305	1	Apba2|X11-like|X11L|XllL|mXllL|-|7 C|7 34.65 cM|protein-coding	5.13e-15	1	1	3.27247	0.542142	1	7.55352	4.05e-12	5.78e-11	0	1	1	0	1	1	0	0	0	0	0.008	0.196
494504	Apcdd1	NM_133237	chr18	63081981	63112849	+	2792	1	Apcdd1|AB023957|AU041258|Drapc1|EIG180|-|18|18 E1|protein-coding	0.301914	0.713663	1	2.13245	0.000121774	0.00239241	9.9048	2.56e-253	6.85e-250	-0.178897	0.860718	1	-0.871312	0.314036	1	0.051	0.03	0.055	0.071	0.247	62.31
11792	Apex1	NM_009687	chr14	51544624	51546863	+	1300	1	Apex1|APE|Apex|HAP1|Ref-1|-|14 26.3 cM|14 C3|protein-coding	-0.0968671	0.554926	1	-0.614289	0.0199313	0.160781	-1.02136	9.9e-10	1.09e-08	0.0059838	0.971187	1	-0.0218521	0.894249	1	129.517	125.113	123.056	120.275	77.165	70.8
30878	Apln	NM_013912	chrX	45378323	45388029	-	3143	1	Apln|6030430G11Rik|Apel|-|X|X A3.2|protein-coding	2.84795	1.34e-32	4.6e-29	5.59123	4.3e-55	6.09e-52	5.10399	1.27e-109	4.08e-107	-0.00351281	1	1	0.100712	0.656201	1	0.719	0.749	0.696	5.033	34.947	27.727
11807	Apoa2	NM_013474	chr1	173155185	173156510	+	515	1	Apoa2|Alp-2|Apo-AII|ApoA-II|ApoAII|Apoa-2|Hdl-1|-|1 H3|1 79.22 cM|protein-coding	3.90895	0.274628	1	3.99907	0.332505	1	7.6128	1.9e-12	2.83e-11	0	1	1	0	1	1	0	0	0	0.096	0.099	1.311
11811	Apobec2	NM_009694	chr17	48558556	48572053	-	1213	1	Apobec2|Arp1|-|17 C|17 24.02 cM|protein-coding	3.32822	0.536043	1	4.96542	0.0605177	0.358043	5.22443	0.01027	0.0364038	4.37841	0.1096	1	4.99011	0.0257342	0.954986	0.048	0.08	0	0.027	0.063	0.104
171504	Apobr	NM_138310	chr7	133728522	133732606	+	3593	1	Apobr|Apob-48r|Apob48r|-|7|7 F3|protein-coding	0.00883057	1	1	1.60009	0.00189328	0.0246896	3.77867	3e-59	3.55e-57	-1.3602	0.000170579	0.0363001	-1.74528	1.84e-05	0.0045763	0.095	0.071	0.236	0.247	0.798	3.769
11815	Apod	NM_007470	chr16	31296278	31314894	-	2066	1	Apod|-|-|16 B2|16 21.41 cM|protein-coding	-1.00805	0.271407	1	-0.191192	0.883106	1	-2.90288	0.0020823	0.0085771	-0.44347	0.626257	1	-0.245033	0.875594	1	0.074	0.082	0.097	0.048	0.08	0.014
71939	Apol6	NM_028010	chr15	76875706	76887538	+	2309	1	Apol6|2310076O14Rik|-|15|15 E1|protein-coding	2.08182	0.00646884	0.192042	3.6914	3.67e-09	1.76e-07	2.87075	7.64e-06	5.01e-05	-2.1062	0.254044	1	-4.37313	0.0859354	1	0.005	0	0.025	0.114	0.348	0.225
11820	App	NM_001198826	chr16	84954681	85173952	-	3284	1	App|Abeta|Abpp|Adap|Ag|Cvap|E030013M08Rik|betaApp|-|16 46.92 cM|16 C3-qter|protein-coding	1.69864	0.125818	1	1.8821	0.0383187	0.259783	3.58143	1.24e-11	1.7e-10	-1.57454	0.372747	1	-1.41343	0.622311	1	0.007	0.007	0.021	0.085	0.078	0.313
11821	Aprt	NM_009698	chr8	125098537	125100807	-	859	1	Aprt|C85684|-|8 E1|8 71.91 cM|protein-coding	-0.0442009	0.789657	1	-0.422942	0.111693	0.53836	-1.00444	2.12e-09	2.24e-08	-0.0962993	0.551231	1	-0.0198447	0.9045	1	106.402	110.859	108.455	110.278	76.919	63.192
66333	Aqp11	NM_175105	chr7	104874889	104886757	-	1317	1	Aqp11|1700015P13Rik|AI648923|sjds|-|7|7 E2|protein-coding	-0.30233	0.224387	1	-1.34525	8.14e-05	0.00167178	-1.20532	4.97e-06	3.35e-05	0.0951032	0.678347	1	0.038212	0.918332	1	1.796	1.724	1.615	1.373	0.639	0.812
11829	Aqp4	NM_009700	chr18	15547903	15562193	-	5075	1	Aqp4|WCH4|-|18 A1|18 8.74 cM|protein-coding	2.15367	0.248677	1	2.05629	0.472332	1	5.36925	9.97e-12	1.37e-10	1.72486	0.409664	1	-0.017984	1	1	0.009	0.002	0.002	0.013	0.013	0.139
64008	Aqp9	NM_022026	chr9	70958466	71011096	-	2638	1	Aqp9|1700020I22Rik|AI266899|AQP-9|-|9|9 D|protein-coding	-2.03176	0.112856	1	-0.176314	1	1	2.31618	1.23e-06	9.12e-06	-3.34499	0.0057074	0.517891	-3.29634	0.00607889	0.387802	0.004	0.005	0.053	0.012	0.043	0.315
212285	Arap2	NM_178407	chr5	62993685	63157416	-	7327	1	Arap2|Centd1|Gm148|mKIAA0580|-|5|5 C3.1|protein-coding	-1.71702	0.0950552	1	-0.878869	0.342252	1	2.02131	9.01e-06	5.83e-05	-2.1883	0.0196376	0.98999	-1.18805	0.145405	1	0.005	0.01	0.022	0.007	0.012	0.107
106952	Arap3	NM_001205336	chr18	38132277	38158623	-	5390	1	Arap3|Centd3|Drag1|E030006K04Rik|cnt-d3|-|18|18 B3|protein-coding	-1.69893	0.400433	1	0.275774	1	1	2.12609	0.00412227	0.0159629	-0.746359	0.746463	1	-0.258817	1	1	0.007	0.009	0.011	0.003	0.015	0.057
215821	Arfgef3	NM_001033258	chr10	18307817	18463564	-	8180	1	Arfgef3|9630004D11|B930094H20Rik|BIG3|D10Bwg1379e|mKIAA1244|-|10 A3|10 7.79 cM|protein-coding	1.08158	0.0970216	1	1.15596	0.153457	0.668389	1.93809	0.00106331	0.00467023	0.233599	0.841246	1	1.4215	0.0274574	1	0.016	0.035	0.013	0.028	0.03	0.058
70497	Arhgap17	NM_001122640	chr7	130422663	130513429	-	3512	1	Arhgap17|5730403H17Rik|Nadrin|Nadrin2|Rich1|Wbp15|-|7|7 F3|protein-coding	0.959069	4.78e-09	9.57e-07	1.10025	0.000121758	0.00239241	2.08771	9.65e-35	5.05e-33	0.0699508	0.673031	1	0.037749	0.82395	1	5.993	5.742	5.519	11.1	12.413	27.107
231532	Arhgap24	NM_029270	chr5	102910410	103326956	+	3334	1	Arhgap24|0610025G21Rik|-|5|5 E4|protein-coding	-0.398058	0.802849	1	-1.36652	0.287944	0.953357	2.30626	3.17e-05	0.000186398	-0.402	0.81695	1	0.149543	1	1	0.03	0.044	0.039	0.03	0.009	0.216
232201	Arhgap25	NM_001037727	chr6	87408539	87483253	-	3682	1	Arhgap25|A130039I20Rik|-|6|6 D1|protein-coding	-0.023857	0.901703	1	-0.707302	0.0146253	0.126965	-1.26961	7.85e-11	9.76e-10	0.0309681	0.862026	1	-0.0930235	0.604918	1	2.772	2.45	2.545	2.648	1.593	1.241
226652	Arhgap30	NM_001005508	chr1	173319091	173340370	+	4473	1	Arhgap30|6030405P05Rik|Gm102|mFLJ00267|-|1|1 H3|protein-coding	-0.0276505	0.87222	1	0.432059	0.146462	0.647542	1.11035	9.79e-11	1.2e-09	0.100487	0.545339	1	0.0736937	0.663635	1	63.778	61.581	57.556	58.402	81.1	143.176
12549	Arhgap31	NM_020260	chr16	38598456	38713148	-	7708	1	Arhgap31|5830477L08Rik|AU041750|Cdgap|D330026I07Rik|-|16|16 B4|protein-coding	0.647615	0.0336085	0.604514	-0.668109	0.112387	0.540284	-1.89665	4.42e-06	3e-05	0.183023	0.583839	1	0.114826	0.728835	1	0.133	0.121	0.113	0.183	0.071	0.035
330914	Arhgap32	NM_001195632	chr9	31923721	32073096	+	10609	1	Arhgap32|3426406O18Rik|Gc-gap|Grit|Px-rics|Rics|mKIAA0712|p200Rhogap|p250Gap|-|9|9 A4|protein-coding	-2.36007	0.00653835	0.192681	2.92872	1.15e-06	3.52e-05	5.88358	1.8e-73	3.14e-71	-4.17663	0.000173125	0.0365188	-6.44597	4.48e-05	0.00928092	0.001	0	0.025	0.005	0.211	1.738
71544	Arhgap42	NM_027823	chr9	8994953	9239013	-	5379	1	Arhgap42|9030420J04Rik|BE136619|-|9|9 A1|protein-coding	2.47824	1	1	2.31044	1	1	9.63907	1.35e-38	8.36e-37	0	1	1	2.39824	1	1	0	0.002	0	0.003	0.002	0.512
216445	Arhgap9	NM_146011	chr10	126760783	126766999	+	1794	1	Arhgap9|AU043488|-|10|10 D3|protein-coding	-0.0160301	0.971522	1	2.9075	3.49e-16	4.05e-14	5.0864	2.2e-92	5.51e-90	-2.09971	1.25e-07	6.55e-05	-2.21601	6.19e-07	0.000265972	0.23	0.202	0.93	0.972	6.95	37.359
72754	Arhgef10l	NM_001112723	chr4	140070400	140204671	-	4353	1	Arhgef10l|2810441C07Rik|-|4|4 D3|protein-coding	-0.818642	8.15e-07	9.72e-05	-2.40264	1e-19	1.65e-17	-3.06371	1.67e-41	1.13e-39	-0.265175	0.0917226	1	-0.239856	0.141937	1	23.902	24.191	27.68	16.383	5.081	3.815
213498	Arhgef11	NM_001003912	chr3	87422673	87541955	+	5558	1	Arhgef11|B930073M02|E130307F09|PDZ-RhoGEF|Prg|RhoGEF|mKIAA0380|-|3|3 F1|protein-coding	0.161791	0.455433	1	1.0746	0.00115983	0.0163484	1.74769	3.02e-18	6.88e-17	0.283984	0.163286	1	0.278036	0.183091	1	1.929	1.878	1.54	1.787	3.411	5.933
69632	Arhgef12	NM_027144	chr9	42771925	42913801	-	10440	1	Arhgef12|2310014B11Rik|AU019857|Larg|mKIAA0382|-|9|9 B|protein-coding	0.311989	0.195315	1	1.5306	3.18e-07	1.07e-05	2.29262	4.16e-27	1.53e-25	0.148289	0.546203	1	0.27461	0.272316	1	0.204	0.221	0.177	0.225	0.518	1.009
207212	Arhgef17	NM_001081116	chr7	108018260	108080675	-	10227	1	Arhgef17|8030463K16|AI428794|AW558066|BC035332|mKIAA0337|-|7|7 E3|protein-coding	0.378341	1	1	2.608	0.00552257	0.0589625	3.30221	2.55e-08	2.38e-07	-1.26427	0.485301	1	-0.172151	1	1	0.002	0.005	0.006	0.008	0.03	0.069
213649	Arhgef19	NM_172520	chr4	140798799	140813477	+	3378	1	Arhgef19|6030432F23|6430573B13Rik|WGEF|-|4|4 D3|protein-coding	5.13e-15	1	1	5.71457	0.00259671	0.0318587	6.61734	2.3e-06	1.64e-05	3.15181	0.53488	1	3.69737	0.281129	1	0.007	0.011	0	0	0.049	0.1
71704	Arhgef3	NM_001289687	chr14	28149223	28217097	+	3635	1	Arhgef3|1200004I24Rik|9830169H03Rik|C76747|Xpln|-|14 A3|14 16.09 cM|protein-coding	-0.217382	0.213893	1	-0.74778	0.0115004	0.105634	-1.30156	1.26e-12	1.9e-11	-0.00301309	0.991603	1	-0.0253004	0.887046	1	6.043	5.879	5.856	5.234	3.658	2.739
268739	Arhgef40	NM_198249	chr14	52604508	52625922	+	5596	1	Arhgef40|E130112L23Rik|Gm669|Solo|-|14|14 C2|protein-coding	1.24712	3.17e-07	4.28e-05	5.06113	1.87e-59	4.1e-56	7.08319	2.15e-213	2.46e-210	0.508449	0.0368043	1	0.299015	0.227397	1	0.446	0.376	0.302	0.755	10.249	47.531
13496	Arid3a	NM_007880	chr10	79389788	79417763	+	5350	1	Arid3a|Bright|Dri1|Dril1|-|10|10 C1|protein-coding	-0.202757	0.196503	1	0.426464	0.083472	0.446499	1.34619	2.13e-17	4.57e-16	0.0885679	0.568995	1	0.0208045	0.897642	1	5.448	4.988	4.928	4.423	6.72	14.557
550619	Arid3c	NM_001252622	chr4	41670868	41678174	-	1652	1	Arid3c|OTTMUSG00000006683|-|4|4 A5|protein-coding	1.30994	0.484293	1	4.84148	5.68e-09	2.64e-07	6.81584	4.73e-32	2.2e-30	-0.913921	1	1	-3.2013	0.541884	1	0.007	0	0.014	0.04	0.486	2.111
214855	Arid5a	NM_001290726	chr1	36364578	36380874	+	5784	1	Arid5a|D430024K22Rik|Mrf1|-|1|1 B|protein-coding	2.24291	2.16e-40	1.04e-36	2.14793	1.18e-16	1.42e-14	2.04529	2.9e-32	1.37e-30	-1.05341	1.18e-08	7.11e-06	-1.00456	8.59e-08	4.7e-05	0.828	0.85	1.651	8.064	7.456	7.957
71371	Arid5b	NM_023598	chr10	67558341	67741474	-	4482	1	Arid5b|4930580B11|5430435G07Rik|AI467247|Desrt|Mrf2|Mrf2alpha|Mrf2beta|-|10|10 B5.1|protein-coding	-0.121216	0.677024	1	0.781122	0.0207671	0.165746	1.88791	7.27e-17	1.5e-15	-0.113931	0.676928	1	-0.362776	0.267877	1	0.478	0.377	0.501	0.473	0.879	2.137
80981	Arl4d	NM_025404	chr11	101526855	101529146	+	1378	1	Arl4d|1110036H21Rik|ARL6|AW456149|Arf4l|Arfl4|Arl5|-|11|11 D|protein-coding	-1.19469	0.000239268	0.0136159	-0.719706	0.106537	0.522625	-1.20945	0.000164437	0.000849271	1.55816	2.48e-10	2.29e-07	1.10295	0.000627951	0.0798959	2.749	1.858	0.896	0.406	0.5	0.449
65106	Arl6ip5	NM_022992	chr6	97160786	97183309	+	1334	1	Arl6ip5|5930404D22Rik|AV001879|Aip-5|Gtrap3-18|addiscin|-|6|6 D3|protein-coding	1.061	1.58e-08	2.83e-06	2.5903	6.38e-19	9.52e-17	3.50271	7.08e-68	1.08e-65	-0.22569	0.201334	1	-0.287003	0.115093	1	37.609	35.851	41.721	90.178	243.264	556.656
67166	Arl8b	NM_026011	chr6	108733053	108773717	+	2919	1	Arl8b|2610313E07Rik|3100002J04Rik|Arl10c|gie1|-|6|6 E2|protein-coding	0.166538	0.298122	1	0.611483	0.0167825	0.14096	1.14129	1.46e-12	2.19e-11	0.00057001	0.998181	1	-0.0660009	0.678794	1	30.84	29.242	29.564	34.176	45.227	75.752
384185	Arl9	NM_206935	chr5	77433080	77438502	+	396	1	Arl9|1700110A09Rik|-|5|5 C3.3|protein-coding	1.09233	0.220472	1	1.27228	0.0869632	0.459605	2.04891	0.000631121	0.00289795	0.253566	0.828118	1	1.14964	0.104674	1	0.297	0.549	0.237	0.54	0.579	1.172
213402	Armc2	NM_001034858	chr10	41634797	41738188	-	4844	1	Armc2|2610018I05Rik|-|10|10 B2|protein-coding	-0.55623	0.364336	1	-2.90152	0.000154204	0.00295469	-2.96944	0.000100548	0.000538385	0.15031	0.811487	1	-0.140569	1	1	0.073	0.057	0.063	0.044	0.008	0.009
76813	Armc6	NM_133972	chr8	72744092	72758321	-	2188	1	Armc6|2410153K17Rik|AW554412|-|8|8 B3.3|protein-coding	-0.148018	0.368778	1	-0.556352	0.0240049	0.18286	-1.06885	1.39e-08	1.34e-07	-0.140413	0.402863	1	0.0266085	0.881903	1	7.647	8.508	8.069	7.613	5.436	4.48
276905	Armc7	NM_177778	chr11	115336991	115351780	+	2244	1	Armc7|A630084C13|BC023126|-|11|11 E2|protein-coding	1.31909	2.2e-13	8.8e-11	2.24921	1.89e-18	2.69e-16	2.93562	2.57e-63	3.45e-61	-0.0528049	0.779963	1	0.0931572	0.632712	1	3.136	3.343	3.106	7.994	14.793	27.762
74100	Arpp21	NM_033264	chr9	111967595	112090270	-	3289	1	Arpp21|0710001E13Rik|AI853636|ARPP-21|D9Bwg1012e|R3hdm3|Tarpp|-|9 F3|9 62.46 cM|protein-coding	0.360042	0.0264843	0.519468	1.26649	5.94e-06	0.000155351	1.0172	3.02e-09	3.13e-08	0.385922	0.0162745	0.916519	0.208707	0.212829	1	6.786	5.946	5.003	6.644	12.605	11.745
216869	Arrb2	NM_001271358	chr11	70246082	70254330	+	1971	1	Arrb2|AI326910|AW122872|-|11 B3|11 42.99 cM|protein-coding	0.31598	0.0432421	0.698569	0.939209	0.000116087	0.00230705	1.03976	6.89e-11	8.64e-10	-0.120421	0.435437	1	-0.12288	0.434492	1	15.174	14.791	15.82	20.686	29.118	38.308
105171	Arrdc3	NM_001042591	chr13	81022683	81035303	+	4079	1	Arrdc3|AI450344|mKIAA1376|-|13|13 C3|protein-coding	-0.0884719	0.64711	1	0.793659	0.00115853	0.0163397	1.15605	3.64e-11	4.72e-10	0.0778647	0.644241	1	0.137564	0.422682	1	3.28	3.338	2.974	2.858	5.044	7.74
74008	Arsg	NM_028710	chr11	109334688	109434643	+	3261	1	Arsg|6330406P08Rik|AI846872|-|11|11 E1|protein-coding	0.0339013	1	1	2.56535	0.000187447	0.00348237	4.98139	5.97e-44	4.45e-42	-0.0475587	1	1	0.42222	0.487682	1	0.038	0.078	0.053	0.053	0.297	1.741
545260	Arsi	NM_001038499	chr18	61071894	61077422	+	1719	1	Arsi|BC020108|-|18|18 E1|protein-coding	-1.33786	2.33e-16	1.47e-13	-2.84463	3.22e-26	8.41e-24	-3.50553	4e-56	4.3e-54	0.296361	0.0579507	1	0.322016	0.0467255	1	34.326	34.856	26.865	11.125	3.797	2.732
11871	Art2a-ps	NR_033804	chr7	108700967	108709379	-	1253	1	Art2a-ps|ARTC2|Art2a|Ly92a|Rt-6|Rt6|Rt6-1|-|7 E3|7 54.6 cM|protein-coding	-0.610722	0.0406447	0.685883	-3.63434	2.33e-19	3.65e-17	-1.04072	0.000153763	0.00079671	0.135379	0.606074	1	-0.260097	0.364078	1	7.169	5.155	5.945	4.245	0.489	3.532
11872	Art2b	NM_019915	chr7	108727374	108729675	-	866	1	Art2b|ART2.2|ARTC2|Art|Ly92b|Rt-6|Rt6|Rt6-2|-|7 E3|7 54.61 cM|protein-coding	-0.572658	0.0700472	0.929594	-3.90969	5e-18	6.81e-16	-1.40453	1.82e-07	1.53e-06	0.285177	0.218999	1	-0.386349	0.201494	1	4.701	2.762	3.665	2.487	0.236	1.624
11878	Arx	NM_007492	chrX	90531846	90543694	+	2861	1	Arx|-|-|X C3|X 41.05 cM|protein-coding	-0.88487	0.0819076	0.999813	-3.29728	1.4e-05	0.000343523	-2.70131	2.55e-05	0.000152167	-0.135995	0.833392	1	0.288358	0.557778	1	0.136	0.182	0.144	0.08	0.013	0.025
76219	Arxes1	NM_029541	chrX	132567906	132569485	+	1577	1	Arxes1|6530401D17Rik|Spc22/23|Spcs3|-|X|X F1|protein-coding	-0.0475255	0.809667	1	-0.719072	0.00705696	0.0721508	-1.885	1.19e-19	2.96e-18	-0.197757	0.289313	1	-0.065112	0.724332	1	7.2	7.737	7.856	7.831	4.632	2.488
76976	Arxes2	NM_029823	chrX	132528359	132529898	+	1537	1	Arxes2|2900062L11Rik|Spc22/23|Spcs3|-|X|X F1|protein-coding	-0.0982059	0.576385	1	-0.621058	0.0152852	0.131653	-1.85425	1.06e-21	2.97e-20	-0.153095	0.371781	1	-0.058074	0.733528	1	14.246	14.965	15.073	14.56	9.43	4.877
57344	As3mt	NM_020577	chr19	46781933	46815585	+	1738	1	As3mt|2310045H08Rik|Cyt19|-|19|19 D1|protein-coding	0.180431	1	1	1.5129	0.0801549	0.434118	1.77123	0.0116141	0.0406941	-0.539116	0.796337	1	-1.23494	0.246657	1	0.034	0.021	0.047	0.057	0.139	0.194
117590	Asb10	NM_080444	chr5	24038515	24046275	-	2319	1	Asb10|Asb-10|BB137407|-|5|5 A3|protein-coding	3.85638	0.296107	1	3.99882	0.332726	1	5.37144	0.00679782	0.0252004	0	1	1	0	1	1	0	0	0	0.021	0.022	0.061
65256	Asb2	NM_023049	chr12	104559352	104594211	-	2678	1	Asb2|1110008E15Rik|-|12 E|12 52.9 cM|protein-coding	0.0821228	0.915412	1	0.240236	0.760919	1	2.06592	9.5e-09	9.36e-08	0.287449	0.47961	1	-0.0556086	1	1	0.211	0.162	0.167	0.184	0.205	0.809
66929	Asf1b	NM_024184	chr8	86479593	86494094	+	1593	1	Asf1b|1700003K02Rik|AA409591|-|8|8 C3|protein-coding	-0.0666576	0.677544	1	-0.0115117	0.963912	1	-1.07764	1.12e-11	1.53e-10	-0.0823678	0.595411	1	-0.120511	0.450715	1	50.425	48.806	51.163	51.156	51.192	28.205
65973	Asph	NM_023066	chr4	9376232	9596309	-	6662	1	Asph|2310005F16Rik|3110001L23Rik|AI848629|AW261690|AW561901|BAH|C79816|cI-37|-|4|4 A1|protein-coding	1.80501	0.0185266	0.415025	5.7873	3.87e-35	1.9e-32	6.71672	3.58e-73	6.15e-71	0.132001	1	1	-0.211069	1	1	0.015	0.011	0.011	0.049	0.727	1.62
66514	Asrgl1	NM_025610	chr19	9186209	9210056	-	2265	1	Asrgl1|2410004D18Rik|ALP|ALP1|AU040643|AW060375|-|19|19 A|protein-coding	-0.124672	0.435231	1	-0.85562	0.000447698	0.00731371	-1.7337	1.89e-26	6.69e-25	-0.037521	0.809892	1	-0.0138683	0.931153	1	26.462	26.891	25.999	24.98	14.116	9.096
11899	Astn1	NM_001205204	chr1	160292435	160621917	+	7199	1	Astn1|Astn|GC14|mKIAA0289|-|1|1 H1|protein-coding	5.13e-15	1	1	3.62825	0.33935	1	8.3278	7.35e-19	1.74e-17	2.30361	1	1	0	1	1	0.002	0	0	0	0.005	0.155
56079	Astn2	NM_207109	chr4	65041837	66065517	-	4806	1	Astn2|1d8|Astnl|bM452J22.1|-|4|4 C1|protein-coding	5.13e-15	1	1	5.13e-15	1	1	5.51198	0.00213636	0.0087787	3.13756	0.538364	1	0	1	1	0.005	0	0	0	0	0.032
108888	Atad3a	NM_179203	chr4	155114749	155135207	-	2401	1	Atad3a|2400004H09Rik|Atad3|Tob3|mKIAA1273|-|4|4 E2|protein-coding	0.0057075	0.973203	1	-0.946843	0.000224259	0.00406082	-1.19014	2.23e-13	3.55e-12	0.00890988	0.954884	1	0.100886	0.535669	1	70.974	75.354	67.866	71.237	34.82	34.463
73242	Atat1	NM_001142745	chr17	36036774	36047013	-	2032	1	Atat1|0610011P08Rik|2610008K08Rik|2610110G12Rik|3110080J08Rik|Mec17|TAT|-|17|17 B3|protein-coding	0.52777	0.0882085	1	0.864955	0.0245302	0.18601	1.84958	1.51e-10	1.82e-09	0.384751	0.28049	1	0.239722	0.509172	1	1.054	0.964	0.872	1.22	1.695	3.995
226641	Atf6	NM_001081304	chr1	172634588	172797902	-	7445	1	Atf6|9130025P16Rik|9630036G24|AA789574|Atf6alpha|ESTM49|-|1 H3|1 76.96 cM|protein-coding	0.135828	0.446075	1	0.358548	0.218443	0.819743	1.11498	3e-10	3.5e-09	0.135941	0.422961	1	0.120334	0.488065	1	10.2	9.969	8.999	10.263	11.988	22.415
54343	Atf7ip	NM_019426	chr6	136467372	136555900	+	4510	1	Atf7ip|2610204M12Rik|AM|Mcaf1|-|6|6 G1|protein-coding	0.0478239	0.808313	1	0.26342	0.395178	1	1.02278	1.88e-07	1.57e-06	0.233228	0.21601	1	0.148483	0.434449	1	21.542	20.092	17.866	19.141	22.359	41.536
51897	Atg13	NM_145528	chr2	91514769	91550749	-	3555	1	Atg13|1110053A20Rik|D2Ertd391e|Harbi1|-|2|2 E1|protein-coding	0.164469	0.308156	1	0.462013	0.0695958	0.393781	1.24138	1.06e-13	1.73e-12	0.104284	0.507183	1	0.0253737	0.875244	1	8.993	8.352	8.077	9.371	11.317	22.049
329015	Atg2a	NM_194348	chr19	6241668	6262304	+	6298	1	Atg2a|1810013C15Rik|A830054M12|BC023754|mKIAA0404|-|19|19 A|protein-coding	0.103776	0.595099	1	0.110417	0.684659	1	1.17089	3.26e-10	3.78e-09	0.188561	0.304096	1	0.165159	0.381446	1	4.99	4.753	4.263	4.76	4.639	11.004
213948	Atg9b	NM_001002897	chr5	23889999	23897961	-	3886	1	Atg9b|Apg912|Apg9l2|Apgdc2|Gm574|Nos3as|eONE|sONE|-|5 A3|5 11.49 cM|protein-coding	-0.217443	0.206283	1	-1.2936	7.76e-07	2.44e-05	-2.4761	1.48e-28	5.79e-27	-0.0390155	0.819248	1	-0.0977575	0.587979	1	5.035	4.682	4.933	4.418	1.955	1.035
108147	Atic	NM_026195	chr1	71603730	71625977	+	2593	1	Atic|2610509C24Rik|AA536954|AW212393|-|1|1 C3|protein-coding	0.104923	0.519121	1	-0.820767	0.00184396	0.0241512	-1.23407	5.66e-14	9.46e-13	0.0670103	0.672279	1	0.0904771	0.587012	1	93.707	95.295	86.1	96.287	49.193	42.367
73991	Atl1	NM_178628	chr12	70994092	71065072	+	2801	1	Atl1|4930435M24Rik|Adfsp|Fsp1|Spg3|Spg3a|-|12|12 C2|protein-coding	0.0874106	1	1	2.26118	0.122807	0.571319	3.79617	2.79e-12	4.07e-11	-0.387339	1	1	0.0693074	1	1	0.017	0.026	0.021	0.023	0.137	0.356
71093	Atoh8	NM_153778	chr6	72156172	72185571	-	2349	1	Atoh8|4933425C05Rik|Hath6|Math6|bHLHa21|okadin|-|6|6 C1|protein-coding	1.32509	0.319232	1	2.52059	0.00921109	0.0892422	2.52282	0.00476124	0.0182169	1.10066	0.374806	1	1.06048	0.567668	1	0.035	0.036	0.015	0.042	0.092	0.108
232975	Atp1a3	NM_001290469	chr7	25763186	25790956	-	3575	1	Atp1a3|Atpa-2|-|7 A3|7 13.73 cM|protein-coding	-0.453802	0.0149917	0.358	-2.59684	1.36e-21	2.62e-19	-2.64511	5.22e-31	2.31e-29	0.244622	0.155192	1	0.212889	0.220501	1	22.071	21.234	18.086	13.812	2.988	3.312
27222	Atp1a4	NM_013734	chr1	174153639	174188555	-	3460	1	Atp1a4|-|-|1 H3|1 79.54 cM|protein-coding	-0.331831	0.825702	1	-5.53493	0.00333745	0.0392345	-3.2476	0.00762824	0.0278736	0.813262	0.174477	1	0.311101	0.859266	1	0.075	0.052	0.041	0.033	0	0.004
11933	Atp1b3	NM_007502	chr9	96233095	96264718	-	1821	1	Atp1b3|AA409958|AI664000|AW212096|-|9 E3.3|9 50.31 cM|protein-coding	0.451282	0.0049513	0.153829	0.466454	0.0668471	0.382823	1.63241	8.03e-22	2.27e-20	-0.0563721	0.716768	1	-0.050721	0.755024	1	64.109	64.282	63.992	91.281	86.114	230.146
11950	Atp5f1	NM_009725	chr3	105745596	105763166	-	1630	1	Atp5f1|C76477|-|3 F2.2|3 46.46 cM|protein-coding	-0.124715	0.499625	1	-0.0807983	0.790476	1	-1.00271	6.64e-08	5.89e-07	-0.235326	0.195945	1	-0.219421	0.23776	1	250.343	250.726	279.199	267.76	245.013	164.041
54411	Atp6ap1	NM_018794	chrX	71542436	71550060	+	2177	1	Atp6ap1|16A|AC45|AI316502|AW108110|Atp6ip1|Atp6s1|C7-1|CF2|VATPS1|XAP-3|mFLJ00383|-|X A7.3|X 37.96 cM|protein-coding	0.0531186	0.73951	1	0.311549	0.212656	0.806837	1.21653	5.45e-14	9.12e-13	0.0344601	0.823274	1	0.0149189	0.929069	1	24.31	23.888	22.833	24.661	28.336	61.522
11975	Atp6v0a1	NM_001243051	chr11	100870766	100925031	+	3986	1	Atp6v0a1|AA959968|ATP6a1|Atp6n1|Atp6n1a|Atpv0a1|Vpp-1|Vpp1|-|11 D|11 64.04 cM|protein-coding	0.30128	0.208408	1	2.09945	2.85e-10	1.58e-08	3.07446	1.18e-50	1.1e-48	-0.136065	0.614065	1	-0.18235	0.511893	1	0.431	0.409	0.457	0.582	2.034	4.466
11972	Atp6v0d1	NM_013477	chr8	108048370	108089940	-	1607	1	Atp6v0d1|AI267038|Ac39|Atp6d|P39|VATX|Vma6|-|8|8 D3|protein-coding	0.0823855	0.618463	1	0.977614	0.000119565	0.00236057	1.63945	3.78e-22	1.09e-20	-0.114766	0.473571	1	-0.0864128	0.598525	1	18.649	18.861	19.259	21.395	38.474	70.235
110935	Atp6v1b1	NM_134157	chr6	83693011	83708804	+	1911	1	Atp6v1b1|AW208839|Atp6b1|D630003L15|D630030L16Rik|D630039P21Rik|Vpp-3|Vpp3|-|6 C3|6 35.94 cM|protein-coding	2.56025	1	1	6.7477	3.36e-06	9.3e-05	5.95005	0.00020829	0.00105116	0	1	1	0	1	1	0	0	0	0.009	0.16	0.11
66237	Atp6v1g2	NM_023179	chr17	35373541	35375712	+	1489	1	Atp6v1g2|1500002D01Rik|Atp6g2|NG38|VAG2|-|17|17 B2|protein-coding	0.364791	0.29745	1	0.411277	0.324576	1	1.03201	0.00155678	0.0065978	0.0680323	0.911251	1	-0.634061	0.109894	1	0.466	0.284	0.434	0.574	0.574	1.029
54667	Atp8b2	NM_001081182	chr3	89743403	89767254	-	5427	1	Atp8b2|Id|-|3|3 F2|protein-coding	0.060298	0.704767	1	0.790732	0.00260037	0.0318711	1.20705	1.01e-13	1.65e-12	0.227285	0.13747	1	0.0957205	0.55063	1	10.418	9.204	8.546	9.29	15.156	22.94
241633	Atp8b4	NM_001080944	chr2	126146709	126317289	-	5499	1	Atp8b4|A530043E15|Im|-|2|2 F1|protein-coding	-0.130268	0.427572	1	-2.14481	1.19e-15	1.31e-13	-2.76279	3.07e-48	2.66e-46	0.0287372	0.860385	1	-0.174349	0.285638	1	9.466	8.034	8.975	8.444	2.068	1.524
11981	Atp9a	NM_001289445	chr2	168459938	168559839	-	3699	1	Atp9a|IIa|-|2|2 H3|protein-coding	0.366697	1	1	4.8361	0.000106736	0.00213535	3.20408	0.0116989	0.0409555	0.7934	1	1	-2.34087	1	1	0.003	0	0.003	0.005	0.141	0.045
50771	Atp9b	NM_001201569	chr18	80930880	81130797	-	5400	1	Atp9b|AA934181|Atpc2b|IIb|MMR|-|18|18 E3|protein-coding	0.179907	0.283825	1	0.307516	0.222298	0.829071	1.11369	1.08e-10	1.32e-09	0.0180697	0.910843	1	0.0877507	0.604151	1	6.681	7.004	6.382	7.515	7.937	15.914
20238	Atxn1	NM_009124	chr13	45645125	46060360	-	10573	1	Atxn1|2900016G23Rik|Atx1|C85907|ENSMUSG00000074917|Gm10786|Sca1|-|13 A5|13 21.98 cM|protein-coding	-0.461072	0.670767	1	2.10486	8.74e-05	0.0017842	3.54076	2.37e-18	5.43e-17	0.0533205	1	1	0.13138	1	1	0.016	0.016	0.014	0.011	0.063	0.198
54138	Atxn10	NM_016843	chr15	85166811	85294266	+	2411	1	Atxn10|AI325283|C77170|E46|Sca10|TEG-169|Tex169|-|15|15 E2|protein-coding	0.105462	0.506215	1	0.778676	0.00243512	0.0301842	1.32874	2.1e-16	4.19e-15	0.0145214	0.926697	1	0.0182189	0.913428	1	39.212	39.317	37.242	41.609	63.899	108.763
69885	Aunip	NM_001081099	chr4	134066914	134079837	+	1265	1	Aunip|2610002D18Rik|Clhc1|-|4|4 D3|protein-coding	0.0897952	0.612228	1	-0.368129	0.151191	0.661343	-1.14853	1.05e-09	1.15e-08	-0.03333	0.856493	1	-0.0568731	0.751103	1	7.078	6.914	6.941	7.617	5.321	3.646
20871	Aurkc	NM_020572	chr7	6948096	6955802	+	1307	1	Aurkc|AIE1|AIK3|ARK-3|IAK3|Stk13|-|7 4.06 cM|7 A2-A3|protein-coding	0.951477	0.711045	1	1.22908	0.751647	1	4.30743	4.05e-09	4.15e-08	-0.873733	1	1	0.543792	1	1	0.01	0.032	0.021	0.043	0.056	0.517
245532	Awat2	NM_001290395	chrX	97597561	97638056	-	1978	1	Awat2|9430062J17Rik|ARAT|Dgat2l4|WS|-|X|X C3|protein-coding	-0.264808	0.587093	1	-0.503199	0.352601	1	-1.63651	0.000806303	0.00362076	0.30048	0.443485	1	-0.0674174	0.854661	1	0.38	0.293	0.278	0.235	0.198	0.114
545662	B020004J07Rik	NM_001033790	chr4	101507574	101516627	-	1969	1	B020004J07Rik|-|-|4|4 C6|protein-coding	2.4762	1	1	5.13e-15	1	1	5.63019	0.00196526	0.00813541	0	1	1	2.40297	1	1	0	0.006	0	0.008	0	0.086
434198	B130024G19Rik	NR_045850	chr7	77510269	77556032	+	1801	1	B130024G19Rik|-|-|7|7 D1|ncRNA	1.48677	0.000478909	0.0242449	1.73416	0.00452214	0.0500877	1.78079	2.11e-05	0.000127975	-0.542888	0.399974	1	-0.793174	0.214577	1	0.098	0.08	0.137	0.402	0.411	0.554
68170	B230118H07Rik	NM_026592	chr2	101400938	101469143	-	2260	1	B230118H07Rik|NWC|-|2 E2|2 53.83 cM|protein-coding	-0.514031	0.0122186	0.307344	-1.95881	6e-09	2.78e-07	-3.14385	1.49e-28	5.85e-27	-0.254745	0.21892	1	-0.123363	0.539172	1	2.535	2.726	2.876	2.103	0.699	0.38
320273	B230208H11Rik	NR_038027	chr10	12636444	12642925	-	1178	1	B230208H11Rik|-|-|10|10|ncRNA	0.198625	0.733942	1	1.65131	0.00020898	0.00383029	2.24633	1.08e-10	1.32e-09	-0.0782423	0.88094	1	-0.446276	0.358959	1	0.466	0.378	0.476	0.59	1.479	2.68
319970	B230323A14Rik	NR_040765	chr9	69608953	69678006	+	1630	1	B230323A14Rik|-|-|9|9|ncRNA	-0.418572	0.587716	1	-2.31734	0.0221369	0.172833	-3.82491	0.000284431	0.00139872	-0.883168	0.22807	1	0.180476	0.770136	1	0.072	0.148	0.13	0.101	0.023	0.009
97884	B3galnt2	NM_178640	chr13	14046941	14091335	+	3667	1	B3galnt2|A930105D20Rik|C80633|D230016N13Rik|-|13|13 A1|protein-coding	-0.254121	0.112525	1	-0.966527	0.000125721	0.00245766	-1.51944	1.17e-20	3.1e-19	0.0698477	0.653257	1	0.00129273	0.995779	1	19.55	18.537	17.956	15.591	9.167	7.244
54218	B3galt4	NM_019420	chr17	34086857	34088433	-	1574	1	B3galt4|Gal-T2|Galt2|-|17|17 B1|protein-coding	-0.170686	0.774753	1	-1.04593	0.0724736	0.405852	1.23875	0.00211465	0.00869841	-0.388395	0.368855	1	0.136701	0.808394	1	0.247	0.345	0.306	0.282	0.154	0.858
93961	B3galt5	NM_033149	chr16	96502639	96541465	+	4909	1	B3galt5|1190002B21Rik|AU045265|b3Galt-V|-|16|16 C4|protein-coding	0.106188	0.551709	1	-1.71697	5.24e-09	2.45e-07	-2.66205	1.49e-31	6.82e-30	-0.0287455	0.878768	1	-0.131965	0.461099	1	1.711	1.565	1.678	1.879	0.483	0.307
53625	B3gnt2	NM_016888	chr11	22734739	22759735	-	2695	1	B3gnt2|AA408337|AA409404|AW260308|B3Galt6|B3gnt1|BGnT-1|BGnT-2|BGnT1|BGnT2|Beta3gnt|-|11 A3.2|11 14.22 cM|protein-coding	-0.912303	2.56e-08	4.43e-06	-1.22713	1.53e-06	4.49e-05	-1.86597	6.92e-25	2.31e-23	0.288048	0.0658301	1	0.163317	0.310288	1	14.303	12.788	11.183	6.181	4.565	3.58
72297	B3gnt3	NM_028189	chr8	74215618	74225699	-	2098	1	B3gnt3|2210008L19Rik|-|8|8 C1|protein-coding	0.454461	0.77519	1	5.72235	7.38e-21	1.3e-18	8.88237	2.62e-111	8.75e-109	0.603511	0.607226	1	-1.23156	0.494895	1	0.045	0.012	0.028	0.039	1.647	16.161
231727	B3gnt4	NM_198611	chr5	123960469	123961891	+	1420	1	B3gnt4|1010001G17Rik|BGnT-4|-|5|5 F|protein-coding	0.29412	0.429959	1	1.82281	1.12e-06	3.43e-05	3.1925	5.81e-27	2.12e-25	0.150731	0.682666	1	0.213021	0.548763	1	0.447	0.442	0.389	0.486	1.374	4.14
97440	B3gnt9	NM_001271915	chr8	107776538	107779053	-	2513	1	B3gnt9|3-Gn-T9|B3gnt9-ps|BGnT-9|C76565|C76566|beta-1|beta3Gn-T9|-|8|8 D3|protein-coding	-0.23307	0.292863	1	0.0967616	0.74078	1	1.07736	3.92e-08	3.58e-07	0.147881	0.477204	1	0.326574	0.115696	1	1.483	1.648	1.28	1.132	1.316	3.098
330406	B4galnt3	NM_198884	chr6	120153828	120244577	-	2940	1	B4galnt3|AB114826|B4GalNAcT3|C330047A21|-|6|6 F1|protein-coding	2.55865	1	1	3.62776	0.339837	1	5.95006	0.000207829	0.00104971	0	1	1	0	1	1	0	0	0	0.006	0.013	0.072
213539	Bag2	NM_145392	chr1	33802329	33814595	-	1810	1	Bag2|2610042A13Rik|BC016230|-|1|1 B|protein-coding	-0.269286	0.0807925	0.995381	-0.752858	0.00202608	0.0260541	-1.23975	2.5e-15	4.61e-14	-0.0377546	0.806878	1	-0.0865214	0.58363	1	26.607	25.609	26.197	22.557	14.938	12.889
228536	Bahd1	NM_001045523	chr2	118727351	118750260	+	4419	1	Bahd1|AL022997|AW541238|Gm117|mKIAA0945|-|2|2 E5|protein-coding	0.646551	0.000167523	0.0101217	1.09262	5.58e-05	0.00118965	2.37847	1.19e-37	7.03e-36	0.158728	0.345272	1	0.0870815	0.60979	1	8.145	7.611	7.078	11.397	15.304	42.318
207495	Baiap2l2	NM_177580	chr15	79088625	79115939	-	2056	1	Baiap2l2|BC048937|-|15|15 E1|protein-coding	0.242493	0.800337	1	-0.390359	0.54935	1	-1.61477	0.0143319	0.049017	-0.495778	0.358141	1	-0.361532	0.726791	1	0.109	0.112	0.149	0.184	0.112	0.055
68010	Bambi	NM_026505	chr18	3507955	3516402	+	5035	1	Bambi|2610003H06Rik|-|18|18 A1|protein-coding	1.50274	0.00112362	0.0485967	3.03551	4.85e-12	3.48e-10	4.83082	4.26e-55	4.47e-53	0.223432	0.781526	1	0.23664	0.778724	1	0.051	0.05	0.042	0.124	0.339	1.413
23825	Banf1	NM_011793	chr19	5364633	5366876	-	969	1	Banf1|Baf|Bcrp1|L2bp1/Baf|-|19|19 A|protein-coding	-0.165704	0.393271	1	-0.116759	0.703758	1	-1.08273	2.57e-08	2.39e-07	-0.253745	0.180791	1	-0.225012	0.246649	1	246.979	241.539	276.12	255.635	231.492	152.694
12021	Bard1	NM_007525	chr1	71074109	71149546	-	5435	1	Bard1|ENSMUSG00000060893|ENSMUSG00000073653|-|1|1 C3|protein-coding	0.0398243	0.816157	1	-0.503547	0.0667192	0.382363	-1.04755	5.84e-09	5.88e-08	0.0688498	0.6802	1	-0.057142	0.744799	1	6.529	5.826	6.036	6.378	4.393	3.358
54422	Barhl1	NM_019446	chr2	28763200	28771941	-	3669	1	Barhl1|Dres115|MBH2|-|2 A3|2 19.38 cM|protein-coding	0.804108	0.387344	1	1.63666	0.0644455	0.373337	3.90802	5.34e-17	1.11e-15	0.721843	0.420814	1	0.680527	0.575489	1	0.038	0.03	0.022	0.04	0.073	0.402
407823	Baz2b	NM_001001182	chr2	59737420	59963797	-	7942	1	Baz2b|5830435C13Rik|BC053917|D2Ertd794e|-|2 C1.1|2 34.18 cM|protein-coding	0.061159	0.764546	1	0.482805	0.102353	0.509523	1.32155	7.04e-11	8.8e-10	0.156972	0.423814	1	0.0795802	0.690769	1	5.424	4.977	4.752	5.116	6.809	13.579
100473	BB031773	NR_028391	chr4	102676711	102684570	-	3651	1	BB031773|-|-|-|ncRNA	-0.622952	0.400592	1	-3.11616	0.0016767	0.0223501	-2.65957	0.00178795	0.00747477	0.596649	0.229814	1	0.564771	0.262724	1	0.106	0.103	0.068	0.045	0.007	0.012
170770	Bbc3	NM_133234	chr7	16894932	16903683	+	1970	1	Bbc3|PUMA|PUMA/JFY1|-|7|7 A2|protein-coding	-0.94925	2.19e-05	0.00174643	-0.528611	0.157697	0.679935	1.34407	1.96e-10	2.34e-09	0.252632	0.221984	1	0.277182	0.270179	1	2.688	2.569	2.154	1.16	1.359	6.389
72873	Bbof1	NM_028377	chr12	85750018	85774730	+	2176	1	Bbof1|2900006K08Rik|AI427784|Ccdc176|-|12|12 D1|protein-coding	0.535584	0.0276495	0.536632	2.20843	5.02e-13	4.1e-11	3.19137	3.26e-50	2.99e-48	0.00856427	0.968655	1	0.160473	0.545697	1	0.827	0.894	0.794	1.179	3.486	8.401
52028	Bbs1	NM_001033128	chr19	4886882	4906627	-	5578	1	Bbs1|AI451249|D19Ertd609e|-|19|19 A|protein-coding	0.218296	0.404968	1	0.390198	0.359366	1	1.01739	1.59e-05	9.89e-05	0.136264	0.581588	1	0.140109	0.55789	1	0.367	0.357	0.322	0.389	0.45	0.754
71769	Bbs10	NM_027914	chr10	110735735	110738792	+	2749	1	Bbs10|1300007O09Rik|AI452285|-|10|10 D1|protein-coding	0.453933	0.0379742	0.658374	0.825345	0.00448653	0.0498096	1.0152	1.08e-05	6.89e-05	0.107933	0.641432	1	0.0288282	0.951353	1	1.027	0.962	0.911	1.292	1.623	2.154
241950	Bbs12	NM_001008502	chr3	37211476	37220373	+	2430	1	Bbs12|Gm1805|Gm407|Gm721|-|3|3 B|protein-coding	-0.274886	0.225635	1	-0.657461	0.03147	0.224491	-1.11619	1.07e-05	6.87e-05	0.0643756	0.786332	1	0.051045	0.851916	1	1.466	1.428	1.36	1.151	0.811	0.714
100042165	BC005561	NM_001166581	chr5	104937371	104951402	+	5178	1	BC005561|-|-|5|5 E5|protein-coding	0.160967	0.453804	1	-0.0331058	0.912623	1	1.16548	7.23e-09	7.22e-08	0.174865	0.41854	1	0.0641091	0.775061	1	2.363	2.076	2.041	2.302	2.014	5.255
407824	BC020402	NR_033219	chr10	7398769	7400956	-	2187	1	BC020402|-|-|-|ncRNA	0.044329	1	1	0.53782	0.209853	0.801091	1.33961	2.78e-05	0.000164957	-0.126628	0.799004	1	-0.140911	0.667225	1	0.247	0.243	0.258	0.278	0.361	0.765
545551	BC021767	NR_033629	chr3	94464511	94471074	-	2220	1	BC021767|-|-|3|3 F2.1|pseudo	2.47617	1	1	5.93563	0.000396826	0.00659706	9.35595	5.92e-33	2.87e-31	0	1	1	0	1	1	0	0	0	0.007	0.08	1.02
225004	BC027072	NM_146082	chr17	72092895	72102225	-	5002	1	BC027072|-|-|17|17 E1.3|protein-coding	3.38514	0.522547	1	6.19717	0.000505553	0.00812094	8.61091	2e-22	5.87e-21	0	1	1	0	1	1	0	0	0	0.007	0.048	0.27
231807	BC037034	NM_153161	chr5	138700886	138705280	-	2533	1	BC037034|-|-|5|5 G2|protein-coding	0.345681	0.0541648	0.799291	0.625333	0.0144945	0.126103	1.30673	3.07e-13	4.85e-12	0.310064	0.148184	1	0.355237	0.0949781	1	4.873	4.769	3.814	4.966	5.798	10.887
407793	BC039966	NR_040670	chr4	153322564	153324585	-	519	1	BC039966|-|-|4|4 E2|ncRNA	-0.743737	0.00966169	0.256723	0.23429	0.500915	1	-1.30252	1.88e-05	0.000114791	-0.728048	0.00797346	0.620511	-0.469072	0.101901	1	2.063	2.397	3.261	2.028	3.783	1.544
320135	BC049715	NM_178776	chr6	136777364	136789075	+	1133	1	BC049715|-|-|6|6 G1|protein-coding	0.0426318	0.932493	1	0.398711	0.363344	1	1.20275	4.41e-05	0.000252667	-0.453227	0.212521	1	-0.346921	0.328089	1	0.457	0.49	0.602	0.639	0.799	1.614
407803	BC051226	NR_045146	chr17	34045127	34046123	-	838	1	BC051226|-|-|17 B1|17|ncRNA	-0.210739	0.570041	1	-0.243772	0.632196	1	-1.4126	4.14e-05	0.000237928	-0.37265	0.23542	1	-0.732513	0.0232935	0.904909	1.516	1.153	1.866	1.648	1.415	0.822
414076	BC051537	NR_046183	chr17	34220788	34232254	-	1663	1	BC051537|-|-|-|ncRNA	-0.489706	0.462658	1	1.15652	0.0403705	0.268917	2.96383	9.54e-15	1.69e-13	-0.560377	0.413484	1	-0.281911	0.749653	1	0.085	0.102	0.12	0.089	0.268	1.108
399568	BC052040	NM_001145898	chr2	115407452	115604504	+	2757	1	BC052040|-|-|2|2 E4|protein-coding	0.0157332	0.932003	1	-0.390419	0.125305	0.579018	-1.0492	1.28e-09	1.39e-08	0.0113903	0.948297	1	0.0393887	0.818571	1	5.791	5.836	5.521	5.815	4.272	3.096
216454	BC089597	NM_145424	chr10	127303532	127314375	+	1259	1	BC089597|CRAD-L|-|10|10 D3|protein-coding	2.55749	1	1	3.62832	0.339285	1	8.7927	3.09e-25	1.05e-23	0	1	1	0	1	1	0	0	0	0.013	0.03	1.217
58251	BC100451	NM_021440	chr11	118193674	118203848	-	1973	1	BC100451|Cep295nl|Ddc8|FS39|Kiaa1731nl|-|11|11 E2|protein-coding	-1.00761	0.00780078	0.220171	-2.28063	0.000215874	0.00393266	-1.66472	9.02e-05	0.000487288	-0.262043	0.493586	1	-0.766526	0.0420228	1	0.459	0.312	0.536	0.275	0.097	0.192
12927	Bcar1	NM_001198839	chr8	114234375	114256036	-	3109	1	Bcar1|AI385681|Cas|Crkas|-|8|8 D3|protein-coding	0.886658	0.267086	1	2.25498	0.00111272	0.0158328	2.53794	5.67e-07	4.43e-06	-0.377661	0.830194	1	0.234199	1	1	0.03	0.047	0.038	0.074	0.201	0.262
29815	Bcar3	NM_013867	chr3	122122698	122233100	+	3286	1	Bcar3|AI131758|AND-34|-|3|3 G3|protein-coding	-1.11687	1.44e-08	2.65e-06	-2.39084	2.41e-14	2.35e-12	-2.87344	5.58e-33	2.71e-31	0.00541706	0.978391	1	-0.298612	0.125364	1	3.624	2.952	3.491	1.676	0.679	0.548
76960	Bcas1	NM_001164369	chr2	170172491	170253345	-	2938	1	Bcas1|2210416M21Rik|9030223A09Rik|AI841227|NABC1|-|2|2 H3|protein-coding	4.2361	0.170426	1	5.94161	0.000769539	0.0115585	5.37476	0.00478301	0.0182799	3.15189	0.535388	1	2.40267	1	1	0.008	0.004	0	0.022	0.065	0.048
12035	Bcat1	NM_007532	chr6	144942355	145024677	-	7839	1	Bcat1|BCATc|Eca39|-|6 G3|6 77.27 cM|protein-coding	0.021277	0.897006	1	-1.21479	3.29e-06	9.14e-05	-2.3671	4.12e-37	2.4e-35	0.0269556	0.865454	1	0.0315373	0.8463	1	17.86	17.626	16.911	17.752	7.289	3.782
66165	Bccip	NM_025392	chr7	140901016	140912828	+	1235	1	Bccip|1110013J05Rik|TOK-1|-|7|7 F4|protein-coding	-0.050319	0.760408	1	-0.460519	0.0766348	0.420451	-1.08912	6.7e-11	8.43e-10	-0.0152231	0.925257	1	-0.0153044	0.927976	1	59.259	59.54	57.076	57.491	39.813	31.393
12040	Bckdhb	NM_199195	chr9	83842388	84017847	+	1385	1	Bckdhb|BCKDE1B|BCKDH E1-beta|-|9|9 E2|protein-coding	-0.225083	0.255619	1	-0.328013	0.231042	0.842067	-1.19147	1.5e-08	1.44e-07	-0.345009	0.0702432	1	-0.299951	0.14093	1	3.356	3.358	4.074	3.597	3.185	2.081
12044	Bcl2a1a	NM_009742	chr9	88851758	88857254	+	792	1	Bcl2a1a|A1|BB218357|Bcl2a1|Bfl-1|Hbpa1|-|9 E3.1|9 47.24 cM|protein-coding	4.31489	0.079368	0.983269	4.71016	0.0534491	0.329308	7.15931	2.46e-09	2.59e-08	0	1	1	3.19112	0.528244	1	0	0.031	0	0.083	0.097	0.621
12045	Bcl2a1b	NM_007534	chr9	89094111	89102676	+	760	1	Bcl2a1b|A1-b|-|9|9 E3.1|protein-coding	4.63304	0.0428829	0.698569	5.23564	0.0107062	0.100059	6.67824	6.13e-07	4.75e-06	0	1	1	3.19134	0.52863	1	0	0.032	0	0.108	0.151	0.463
12047	Bcl2a1d	NM_007536	chr9	88618126	88626688	-	792	1	Bcl2a1d|A1-d|-|9|9 E3.1|protein-coding	4.61299	0.0413327	0.688151	5.17678	0.0221564	0.172929	7.48788	1.63e-11	2.19e-10	0	1	1	3.69738	0.281076	1	0	0.046	0	0.104	0.145	0.781
66813	Bcl2l14	NM_025778	chr6	134346347	134388742	+	2211	1	Bcl2l14|4930452K23Rik|4933405K19Rik|9030625M01Rik|AI429211|Bclg|-|6|6 G1|protein-coding	1.60303	1.36e-08	2.53e-06	0.999255	0.00658436	0.0680715	1.00748	0.000993275	0.00438584	-0.706754	0.0601724	1	-0.909461	0.0167072	0.746763	0.208	0.18	0.324	1.034	0.634	0.763
71911	Bdh1	NM_001122683	chr16	31428839	31458987	+	3108	1	Bdh1|2310032J20Rik|AI327223|Bdh|-|16|16 B2|protein-coding	-0.0986906	0.53697	1	-0.759967	0.00323879	0.038309	-1.47391	8.65e-18	1.9e-16	-0.095633	0.542888	1	-0.0974495	0.552347	1	33.799	33.788	34.642	33.749	20.714	14.465
69772	Bdh2	NM_001172055	chr3	134944185	134967389	+	1159	1	Bdh2|1810026B04Rik|Dhrs6|-|3|3 H2|protein-coding	0.853022	0.392409	1	2.93161	2.14e-07	7.49e-06	2.09108	0.000403489	0.00192094	-0.0616837	1	1	0.209516	0.83477	1	0.081	0.094	0.081	0.156	0.627	0.413
666938	Bend4	NM_001164806	chr5	67783386	67819038	-	7928	1	Bend4|D330027G24Rik|EG666938|-|5 C3.1|5|protein-coding	2.08208	0.0202605	0.444529	4.82994	1.63e-14	1.61e-12	7.92985	2.2e-91	5.46e-89	-1.43349	0.645829	1	-1.35059	0.649993	1	0.001	0.002	0.004	0.021	0.133	1.368
107993	Bfsp2	NM_001002896	chr9	103327254	103382658	-	1561	1	Bfsp2|AI448593|CP49|-|9|9 F1|protein-coding	-0.580478	0.0102775	0.270396	-0.904654	0.00518044	0.0560135	-1.20985	5.83e-07	4.53e-06	-0.365526	0.102822	1	-0.157889	0.532325	1	2.246	2.492	2.756	1.928	1.413	1.396
12122	Bid	NM_007544	chr6	120843137	120866838	-	1883	1	Bid|2700049M22Rik|AI875481|AU022477|-|6 F1|6 57.02 cM|protein-coding	-0.365229	0.0209564	0.453299	-1.10966	6.39e-06	0.000166516	-1.33329	8.38e-17	1.72e-15	-0.00794875	0.960008	1	0.0230662	0.888545	1	32.974	33.507	31.754	25.726	14.271	14.66
668218	Bin2	NM_001270537	chr15	100471513	100499931	-	1965	1	Bin2|-|-|15|15 F1|protein-coding	0.168961	0.277124	1	0.76464	0.00177642	0.0234197	1.27008	4.17e-15	7.55e-14	0.212847	0.158001	1	0.199415	0.197601	1	17.478	16.925	14.494	16.954	24.776	40.549
11796	Birc3	NM_007464	chr9	7848701	7873170	-	2800	1	Birc3|AW107670|Api1|Api2|Birc2|HIAP2|IAP1|IAP2|MIAP1|MIAP2|MIHB|MIHC|RNF49|cIAP-1|cIAP-2|cIAP1|cIAP2|-|9|9 A2|protein-coding	0.688388	0.000322993	0.0175328	0.969209	0.0074594	0.0753036	1.6216	2.98e-17	6.32e-16	0.253224	0.193464	1	0.258866	0.200411	1	1.933	1.911	1.566	2.607	3.278	5.575
246229	Bivm	NM_144558	chr1	44176813	44201616	+	3559	1	Bivm|AI854267|-|1|1 C1.1|protein-coding	0.963126	1.79e-09	3.99e-07	2.18581	2.4e-17	3.1e-15	3.26858	4.5e-79	9.1e-77	-0.061852	0.700813	1	-0.0431026	0.793508	1	5.617	5.573	5.621	11.25	25.331	63.031
17060	Blnk	NM_008528	chr19	41003417	41069025	-	2078	1	Blnk|BASH|Bca|Ly-57|Ly57|Lyw-57|SLP-65|-|19 C3|19 34.26 cM|protein-coding	4.87551	0.0219967	0.464633	8.41238	1.05e-15	1.16e-13	12.9052	1.25e-138	5.78e-136	2.30368	1	1	5.62857	0.00235513	0.207227	0.006	0.076	0	0.047	0.479	12.77
140780	Bmp2k	NM_080708	chr5	97426708	97520067	+	6550	1	Bmp2k|4933417M22Rik|AA673486|AV128808|BIKE|-|5|5 E3|protein-coding	0.343394	0.0368614	0.648907	0.704373	0.00433077	0.0484325	1.16334	1.45e-12	2.17e-11	-0.0165797	0.926464	1	-0.0605802	0.729087	1	2.296	2.176	2.238	2.92	3.659	5.801
12160	Bmp5	NM_007555	chr9	75623172	75748123	+	3818	1	Bmp5|AU023399|se|-|9 D|9 42.34 cM|protein-coding	5.13e-15	1	1	3.87095	0.311619	0.983279	5.74822	0.000632596	0.00290251	0	1	1	0	1	1	0	0	0	0	0.01	0.048
12162	Bmp7	NM_007557	chr2	172693513	172765822	-	3661	1	Bmp7|OP1|-|2 H3|2 95.54 cM|protein-coding	-0.275431	0.0917763	1	-1.21643	8.37e-07	2.61e-05	-2.4163	1.23e-36	7.04e-35	0.1021	0.507264	1	0.144139	0.361276	1	17.294	17.544	15.498	13.42	6.682	3.357
12164	Bmp8b	NM_007559	chr4	122782408	122803334	+	2931	1	Bmp8b|Op3|-|4 D2.2|4 57.38 cM|protein-coding	1.87303	0.0870143	1	3.50504	0.000885445	0.0130388	3.88485	1.09e-06	8.12e-06	2.27393	0.0325072	1	1.83842	0.223727	1	0.044	0.033	0.008	0.034	0.091	0.154
12167	Bmpr1b	NM_001277218	chr3	141500100	141594552	-	5182	1	Bmpr1b|AI385617|ALK-6|AV355320|Acvrlk6|Alk6|BMPR-1B|BMPR-IB|CFK-43a|SKR6|-|3|3 H1|protein-coding	5.13e-15	1	1	5.13e-15	1	1	6.79111	2.58e-07	2.12e-06	0	1	1	0	1	1	0	0	0	0	0	0.074
242509	Bnc2	NM_172870	chr4	83918446	84320990	-	6445	1	Bnc2|5031434M05Rik|8430420F16Rik|-|4|4 C4|protein-coding	-0.568661	0.291273	1	-1.69279	0.0078189	0.0782118	-1.3598	0.0108231	0.0381786	-1.13973	0.0317746	1	-0.896677	0.0759405	1	0.027	0.032	0.058	0.041	0.018	0.026
12176	Bnip3	NM_009760	chr7	146082519	146101189	-	1748	1	Bnip3|Nip3|-|7|7 F5|protein-coding	-2.02617	5.89e-17	3.93e-14	-0.676635	0.0215959	0.170187	-1.18669	3.62e-07	2.9e-06	-0.273648	0.259457	1	-0.0895879	0.697965	1	8.508	9.247	9.67	2.512	5.871	5.02
117606	Boc	NM_172506	chr16	44485158	44558983	-	4407	1	Boc|4732455C11|mFLJ00376|-|16|16 B5|protein-coding	5.13e-15	1	1	5.13e-15	1	1	5.06316	0.0137084	0.0471258	0	1	1	0	1	1	0	0	0	0	0	0.026
66162	Bola2	NM_175103	chr7	133839514	133840207	+	332	1	Bola2|1110025L05Rik|BolA-2|-|7|7 F3|protein-coding	-0.276854	0.238732	1	0.0207355	0.95939	1	-1.28004	1.2e-07	1.03e-06	-0.408507	0.0838295	1	-0.271116	0.249061	1	109.368	118.145	136.269	118.866	119.494	66.755
78653	Bola3	NM_175277	chr6	83299478	83308386	+	524	1	Bola3|1810056O20Rik|-|6|6 C3|protein-coding	-0.303694	0.226497	1	-0.217153	0.555623	1	-1.27657	5.28e-07	4.13e-06	-0.492598	0.0424052	1	-0.424282	0.0857114	1	52.925	53.877	69.717	58.994	54.204	34.325
66557	Bpifb2	NM_025631	chr2	153700781	153721006	+	1712	1	Bpifb2|2310034L21Rik|2310069A01Rik|AV089125|Bpil1|LPLUNC2|RYSR|-|2|2 H1|protein-coding	5.13e-15	1	1	7.6049	2.17e-09	1.08e-07	11.617	2.5e-94	6.4e-92	0	1	1	0	1	1	0	0	0	0	0.365	6.35
228796	Bpifb6	NM_199303	chr2	153726124	153738529	+	1648	1	Bpifb6|Bpil3|Gm119|Lplunc6|-|2|2 H1|protein-coding	5.13e-15	1	1	3.11753	0.567307	1	8.27462	1.38e-18	3.22e-17	0	1	1	0	1	1	0	0	0	0	0.015	0.649
109880	Braf	NM_139294	chr6	39553237	39675462	-	9703	1	Braf|9930012E13Rik|AA120551|AA387315|AA473386|B-raf|Braf-2|Braf2|C230098H17|C87398|D6Ertd631e|-|6 B1|6 18.43 cM|protein-coding	0.581525	0.00252718	0.0911111	1.60104	3.96e-08	1.57e-06	2.99098	4.92e-49	4.37e-47	0.0685749	0.70658	1	-0.0169037	0.933728	1	4.02	3.678	3.731	5.636	11.509	34.023
114642	Brdt	NM_054054	chr5	107760213	107816077	+	4689	1	Brdt|7420412D09Rik|Brd6|Fsrg3|-|5|5 E5|protein-coding	-0.88735	0.000298184	0.016446	-1.09028	0.000618454	0.00965289	-1.12978	4.62e-06	3.13e-05	-0.382852	0.0897314	1	-0.185648	0.412364	1	0.469	0.533	0.587	0.333	0.277	0.312
67832	Brix1	NM_026396	chr15	10404534	10415692	-	2642	1	Brix1|1110064N10Rik|Bxdc2|C76935|-|15|15 A1|protein-coding	-0.221208	0.194814	1	-0.590998	0.0267325	0.198774	-1.02413	1.26e-09	1.37e-08	-0.0631324	0.705828	1	-0.0876326	0.601758	1	56.809	55.101	56.497	50.151	35.986	32.527
268936	Brpf3	NM_001081315	chr17	28938071	28975734	+	5958	1	Brpf3|AI413466|AW493400|mKIAA1286|-|17|17 A3.3|protein-coding	0.017769	0.920329	1	0.189757	0.481031	1	1.03547	2.48e-09	2.6e-08	0.17788	0.305618	1	0.170051	0.319216	1	5.707	5.56	4.899	5.119	5.719	11.549
100383	Bsdc1	NM_133889	chr4	129138923	129165676	+	2646	1	Bsdc1|1110063F24Rik|AW011758|-|4|4 D2.2|protein-coding	-0.0273948	0.870232	1	0.945674	0.000162571	0.00309283	1.51856	7.21e-22	2.04e-20	0.0187751	0.911431	1	-0.0140525	0.937508	1	7.377	7.067	7.005	7.115	13.755	23.316
69550	Bst2	NM_198095	chr8	74058161	74061336	-	759	1	Bst2|2310015I10Rik|Bst-2|C87040|CD317|DAMP-1|GREG|-|8|8 B3.3|protein-coding	-0.164359	0.412751	1	-0.5072	0.0789295	0.429174	-1.14703	8.99e-09	8.88e-08	-0.202919	0.314346	1	-0.172961	0.394072	1	218.889	215.787	238.504	221.624	161.71	127.194
74007	Btbd11	NM_028709	chr10	84849559	85123037	+	5769	1	Btbd11|6330404E16Rik|-|10|10 C1|protein-coding	-2.14668	1	1	2.66821	0.171133	0.714079	6.36296	1.91e-21	5.27e-20	-2.32885	1	1	-2.30134	1	1	0	0	0.003	0	0.026	0.359
78611	Btbd19	NR_024078	chr4	116791823	116798330	-	2572	1	Btbd19|9530048O09Rik|BB115071|-|4|4 D1|ncRNA	-0.0868289	0.627882	1	-1.17096	2.41e-05	0.000561962	-1.48225	2.49e-15	4.59e-14	-0.0329885	0.855077	1	-0.001116	1	1	3.948	3.997	3.875	3.766	1.636	1.613
228662	Btbd3	NM_145534	chr2	138104229	138113158	+	4934	1	Btbd3|mKIAA0952|-|2|2 F3|protein-coding	-5.17807	0.00695874	0.20107	-5.3166	0.00789024	0.0787943	2.49234	8.57e-07	6.53e-06	-1.72451	0.120793	1	-5.37195	0.00432361	0.311287	0.007	0	0.024	0	0	0.16
12226	Btg1	NM_007569	chr10	96079635	96085445	+	5004	1	Btg1|AI426953|AW546738|-|10|10 C3|protein-coding	0.600614	0.000313238	0.0171249	1.37953	2.15e-07	7.51e-06	1.78397	9.16e-27	3.31e-25	0.0405738	0.799276	1	-0.105878	0.510537	1	30.433	27.048	28.279	44.101	71.095	113.544
12229	Btk	NM_013482	chrX	131076880	131117679	-	2514	1	Btk|AI528679|xid|-|X E3|X 56.18 cM|protein-coding	-1.45613	0.0767641	0.978244	0.5863	0.399194	1	3.764	1.78e-22	5.26e-21	-1.4305	0.0429044	1	-1.69345	0.0185711	0.789714	0.051	0.043	0.131	0.052	0.188	2.12
208154	Btla	NM_001037719	chr16	45224450	45253008	+	3227	1	Btla|A630002H24|-|16|16 B5|protein-coding	0.0345349	0.900798	1	-0.484878	0.129201	0.591341	-1.77465	6.66e-10	7.48e-09	0.0297946	0.913447	1	0.150914	0.549091	1	0.672	0.723	0.631	0.668	0.439	0.214
12236	Bub1b	NM_009773	chr2	118423947	118467328	+	3644	1	Bub1b|AU045529|BUBR1|-|2|2 E5|protein-coding	-0.114756	0.519372	1	-0.591717	0.034676	0.24079	-1.34812	5.82e-15	1.04e-13	0.108069	0.510529	1	0.175831	0.310955	1	84.519	88.755	75.818	73.335	51.615	34.327
207777	Bzrap1	NM_172449	chr11	87574043	87599430	+	7582	1	Bzrap1|D230016K05|PRAX-1|mKIAA0612|-|11|11 C|protein-coding	0.217706	0.267709	1	-0.174476	0.539779	1	1.18629	1.64e-09	1.76e-08	0.0687455	0.795388	1	0.172229	0.506912	1	1.061	1.06	0.986	1.186	0.839	2.582
66912	Bzw2	NM_025840	chr12	36818422	36883412	-	1857	1	Bzw2|1110001I24Rik|Bdm2|HSPC028|-|12|12 B2|protein-coding	-0.114201	0.473886	1	-0.781512	0.00223065	0.0281841	-1.48686	1.25e-18	2.93e-17	-0.015133	0.923607	1	0.0395958	0.809307	1	94.553	98.033	91.735	88.095	52.097	37.947
620078	C130026I21Rik	NM_175219	chr1	85242919	85267141	-	1961	1	C130026I21Rik|4930565N07Rik|OTTMUSG00000029174|-|1|1 C5|protein-coding	0.392395	0.0978213	1	1.0913	0.000386392	0.00646594	3.76177	5.14e-79	1.03e-76	0.0566876	0.825166	1	0.0800591	0.721816	1	1.334	1.312	1.239	1.637	2.702	18.623
243407	C130060K24Rik	NM_175524	chr6	65331288	65408144	+	2945	1	C130060K24Rik|-|-|6|6 C1|protein-coding	2.47697	1	1	5.13e-15	1	1	5.3855	0.00705382	0.0260118	0	1	1	0	1	1	0	0	0	0.006	0	0.048
12261	C1qbp	NM_007573	chr11	70791348	70796528	-	1157	1	C1qbp|AA407365|AA986492|D11Wsu182e|HABP1|P32|gC1qBP|-|11 B4|11 43.21 cM|protein-coding	-0.0523737	0.74839	1	-0.646417	0.0140374	0.123061	-1.29961	3.89e-15	7.06e-14	-0.0199382	0.901739	1	0.00742134	0.96478	1	238.596	241.467	230.977	232.477	142.366	109.499
50909	C1ra	NM_023143	chr6	124462639	124473458	+	2749	1	C1ra|AI132558|C1r|mC1rA|-|6|6 F2|protein-coding	0.131121	0.776812	1	-0.541691	0.364073	1	-1.86869	0.000164767	0.000850792	-0.325408	0.456326	1	-0.122823	0.785986	1	0.163	0.185	0.197	0.221	0.125	0.061
12263	C2	NM_013484	chr17	34999547	35019045	-	2624	1	C2|-|-|17 B1|17 18.41 cM|protein-coding	0.286692	0.833979	1	0.920939	0.192716	0.761962	1.60579	0.00436401	0.0168041	0.286793	0.715096	1	0.113399	1	1	0.063	0.055	0.049	0.063	0.087	0.177
100532730	C230037L18Rik	NR_077233	chr15	89306683	89315281	+	867	1	C230037L18Rik|-|-|15 E|15 44.94 cM|ncRNA	0.426335	0.586058	1	1.21523	0.0547124	0.334351	1.37453	0.0128893	0.0446742	-0.0505801	1	1	0.209137	0.864639	1	0.176	0.209	0.176	0.247	0.397	0.535
78445	C330013E15Rik	NR_045701	chr15	100444571	100445541	-	876	1	C330013E15Rik|-|-|15|15|ncRNA	0.62199	0.170651	1	2.72112	2.1e-10	1.2e-08	2.75997	1.79e-15	3.34e-14	-0.253012	0.795818	1	-0.412878	0.479847	1	0.269	0.234	0.309	0.488	1.95	2.456
72575	C430049B03Rik	NR_038184	chrX	50406289	50410367	-	2989	1	C430049B03Rik|2700063P19Rik|9430052C07Rik|mir-322|mir-351|mir-503|-|X|X A5|ncRNA	-0.0850067	1	1	1.6266	0.00686629	0.0704711	1.63842	8.58e-05	0.000464692	-0.206532	0.883355	1	0.0536128	1	1	0.071	0.085	0.079	0.077	0.213	0.287
625018	C4a	NM_011413	chr17	34946037	34960399	-	5318	1	C4a|Slp|SlpA|-|17 B1|17 18.37 cM|protein-coding	1.53061	0.00303443	0.105446	1.61903	0.00101215	0.0146094	3.35894	4.01e-21	1.09e-19	-0.114657	1	1	0.430129	0.379725	1	0.044	0.064	0.046	0.133	0.139	0.555
12268	C4b	NM_009780	chr17	34865326	34880842	-	5350	1	C4b|C4|Ss|-|17 B1|17 18.29 cM|protein-coding	1.21993	0.037246	0.650913	2.16481	0.00017338	0.00325978	3.6971	5.2e-20	1.33e-18	-0.46209	0.686427	1	-0.0109868	1	1	0.02	0.027	0.026	0.065	0.124	0.405
12269	C4bp	NM_007576	chr1	132532498	132558195	-	1871	1	C4bp|AI195242|C4bpa|-|1 E4|1 56.89 cM|protein-coding	-0.160784	0.799735	1	-1.16778	0.176584	0.726112	-2.03149	0.00192869	0.00800137	-1.06206	0.0474764	1	-0.570175	0.273683	1	0.094	0.129	0.188	0.176	0.075	0.053
320827	C530008M17Rik	NM_001163793	chr5	77269624	77302579	+	6824	1	C530008M17Rik|2810489J07Rik|4930529A19Rik|4931405B09Rik|Kiaa1211|mKIAA1211|-|5|5 E1|protein-coding	0.314992	0.705078	1	0.660146	0.457622	1	3.11042	1.19e-13	1.94e-12	-0.0417809	1	1	0.55292	0.34211	1	0.021	0.03	0.021	0.027	0.032	0.21
12273	C5ar1	NM_001173550	chr7	16832094	16844687	-	2536	1	C5ar1|C5aR|C5r1|Cd88|D7Msu1|-|7 A2|7 8.77 cM|protein-coding	5.13e-15	1	1	5.20351	0.0423224	0.278067	6.2882	1.74e-05	0.000107352	0	1	1	0	1	1	0	0	0	0	0.051	0.108
381590	C87499	NM_198663	chr4	88273224	88280090	-	1822	1	C87499|-|-|4|4 C4|protein-coding	5.13e-15	1	1	3.11886	0.566252	1	7.15931	2.46e-09	2.59e-08	0	1	1	0	1	1	0	0	0	0	0.017	0.297
230558	C8a	NM_146148	chr4	104488285	104549003	-	3622	1	C8a|-|-|4|4 C6|protein-coding	-0.416244	0.425103	1	-2.14487	0.000819129	0.0121891	-2.8994	1.61e-06	1.17e-05	-1.66401	0.00070775	0.109802	-2.31043	9.68e-06	0.0026756	0.043	0.027	0.134	0.103	0.029	0.02
667803	C920025E04Rik	NM_001271005	chr17	36245975	36248621	-	1280	1	C920025E04Rik|H2-T11|-|17|17 B1|protein-coding	-0.226902	0.262161	1	0.656674	0.0188872	0.154483	1.13429	9.9e-10	1.09e-08	-0.0839282	0.722442	1	0.0920299	0.681011	1	3.208	3.435	3.269	2.916	5.239	8.35
29865	Cabp5	NM_013877	chr7	13983504	13994227	+	1737	1	Cabp5|-|-|7|7 A2|protein-coding	2.47736	1	1	4.29109	0.205525	0.791072	5.75548	0.00144866	0.00619085	3.68327	0.29839	1	0	1	1	0.02	0	0	0.009	0.037	0.105
12288	Cacna1c	NM_001256002	chr6	118537258	119058513	-	13791	1	Cacna1c|Cav1.2|Cchl1a1|D930026N18Rik|MBC|MELC-CC|-|6 F1|6 55.86 cM|protein-coding	0.220647	0.229581	1	-0.866141	0.00168552	0.0224303	-1.43567	9.7e-13	1.47e-11	0.154709	0.400976	1	0.0942678	0.615046	1	1.61	1.539	1.404	1.709	0.786	0.621
12289	Cacna1d	NM_028981	chr14	30853130	31304342	-	8636	1	Cacna1d|8430418G19Rik|C79217|Cach3|Cacn4|Cacnl1a2|Cav1.3|Cchl1a|Cchl1a2|D-LTCC|-|14 18.43 cM|14 B|protein-coding	-0.53109	0.00642339	0.191167	-2.19675	1.35e-14	1.35e-12	-2.1967	1.38e-24	4.55e-23	-0.0615521	0.746111	1	-0.0677194	0.728266	1	2.399	2.385	2.434	1.738	0.523	0.609
12292	Cacna1s	NM_014193	chr1	137949478	138016399	+	6143	1	Cacna1s|AW493108|Cav1.1|Cchl1a3|fmd|mdg|sj|-|1 59.55 cM|1 F|protein-coding	-2.99567	0.528931	1	0.563642	1	1	5.21412	3.78e-17	7.98e-16	-3.19708	0.52142	1	-0.0356429	1	1	0	0.004	0.004	0	0.006	0.185
12298	Cacnb4	NM_001285427	chr2	52283840	52414131	-	8072	1	Cacnb4|3110038O15Rik|Cchb4|lh|-|2 C1.1|2 29.98 cM|protein-coding	2.16505	0.00759823	0.21572	3.52063	5.64e-07	1.82e-05	3.71245	6.14e-10	6.92e-09	1.34502	0.145385	1	1.52147	0.101737	1	0.017	0.019	0.006	0.03	0.073	0.099
12301	Cacybp	NM_009786	chr1	162132498	162143023	-	2107	1	Cacybp|SIP|-|1|1 H1|protein-coding	-0.396721	0.0496226	0.765901	-0.596666	0.0594181	0.353671	-1.26861	3.18e-10	3.69e-09	-0.205908	0.288185	1	-0.198794	0.310153	1	122.195	121.346	133.127	104.769	81.335	65.294
69719	Cad	NM_023525	chr5	31357153	31380852	+	7091	1	Cad|2410008J01Rik|AU018859|Cpad|-|5|5 B1|protein-coding	0.171425	0.394053	1	-1.12648	0.000147731	0.00283972	-1.21034	1.88e-09	2.01e-08	0.0951606	0.636602	1	0.0797192	0.686656	1	58.18	55.654	53.092	62.108	24.686	26.265
100526796	Cahm	NR_037588	chr17	10512784	10514006	+	1222	1	Cahm|B930003M22Rik|-|17|17|ncRNA	0.378294	1	1	2.40406	0.0030019	0.0358959	2.55811	0.000796319	0.00358061	-0.0478465	1	1	1.55773	0.103015	1	0.039	0.119	0.038	0.054	0.198	0.276
12308	Calb2	NM_007586	chr8	112666438	112692106	-	1418	1	Calb2|CR|-|8|8 E1|protein-coding	0.415457	1	1	3.93791	9.01e-06	0.000228425	4.65362	8.43e-12	1.17e-10	-3.22227	0.531266	1	-3.20195	0.542926	1	0	0	0.017	0.023	0.288	0.545
67488	Calcoco1	NM_026192	chr15	102537208	102552609	-	2807	1	Calcoco1|1810009B06Rik|Cocoa|Gcap11|mKIAA1536|-|15 F3|15|protein-coding	-0.049577	0.818949	1	0.642982	0.0274345	0.203365	2.23044	1.61e-28	6.3e-27	0.115886	0.572753	1	0.0385145	0.853681	1	4.586	4.261	4.12	4.106	6.544	22.144
12313	Calm1	NM_009790	chr12	101437645	101448034	+	4117	1	Calm1|AI256814|AI327027|AI461935|AL024000|CaM|Calm|-|12|12 E|protein-coding	-0.138618	0.400795	1	-0.419721	0.11185	0.539008	-1.04566	3.7e-10	4.26e-09	0.0720948	0.658749	1	0.0355091	0.834649	1	176.357	171.819	159.975	151.323	115.748	90.552
12315	Calm3	NM_007590	chr7	17500728	17509381	-	2200	1	Calm3|CaMA|R75142|-|7 A2|7 9.15 cM|protein-coding	-0.0912617	0.584839	1	-0.400305	0.129192	0.591341	-1.10252	9.11e-11	1.12e-09	-0.116531	0.475692	1	-0.101853	0.546579	1	162.441	163.148	167.87	164.76	123.859	91.414
73316	Calr3	NM_028500	chr8	74948082	74967677	-	1659	1	Calr3|1700031L01Rik|6330586I20Rik|Crt2|cspn|-|8|8 C1|protein-coding	-0.43735	0.0489817	0.759911	-1.00883	0.00136087	0.0187133	-2.21922	1.4e-17	3.05e-16	-0.39858	0.0674645	1	-0.377461	0.0888095	1	1.645	1.675	2.076	1.616	0.984	0.517
227541	Camk1d	NM_177343	chr2	5214503	5635808	-	7196	1	Camk1d|A630059D12Rik|CKLiK|CaMKIdelta|E030025C11Rik|mCKLiK|-|2|2 A1|protein-coding	-3.51594	0.0251273	0.501025	-3.72765	0.0276514	0.204406	1.91945	0.00107119	0.00469968	-1.67808	0.116744	1	-3.06533	0.0101868	0.546789	0.011	0.004	0.03	0.002	0.002	0.138
12323	Camk2b	NM_001174053	chr11	5869669	5965751	-	3988	1	Camk2b|-|-|11 A1|11 3.89 cM|protein-coding	-0.756561	0.767794	1	2.2026	0.00199896	0.0258019	3.76299	3.45e-12	4.95e-11	-1.21903	0.380264	1	-1.13789	0.379554	1	0.009	0.009	0.021	0.013	0.104	0.339
66259	Camk2n1	NM_025451	chr4	138011063	138016041	+	3609	1	Camk2n1|1810006K23Rik|AI848599|AI891706|-|4|4 D3|protein-coding	-2.147	1	1	-2.24157	1	1	3.64765	0.00145209	0.00620331	-0.0308774	1	1	-2.3014	1	1	0.003	0	0.003	0	0	0.058
12326	Camk4	NM_009793	chr18	33098695	33355421	+	12318	1	Camk4|A430110E23Rik|AI666733|CaMKIV|CaMKIV/Gr|D18Bwg0362e|-|18 B1|18 18.15 cM|protein-coding	-0.0250836	0.888181	1	-1.2425	3.12e-06	8.69e-05	-1.97544	1.22e-23	3.83e-22	0.139201	0.417243	1	0.0651702	0.709873	1	9.887	9.201	8.709	8.81	3.655	2.541
55984	Camkk1	NM_018883	chr11	72832510	72855567	+	3433	1	Camkk1|AI846603|CaMKKalpha|Camkk|-|11|11 B4|protein-coding	-0.746208	0.00013073	0.00818663	-2.45545	2.48e-16	2.97e-14	-2.3918	7.09e-25	2.37e-23	-0.169194	0.344815	1	-0.168458	0.368362	1	1.995	1.971	2.16	1.346	0.386	0.475
216874	Camta2	NM_178116	chr11	70482965	70501607	-	4622	1	Camta2|Kiaa0909-hp|mKIAA0909|-|11 B3|11 43.21 cM|protein-coding	0.414065	0.0219193	0.464633	0.578556	0.0475159	0.301163	1.57051	8.82e-19	2.08e-17	0.0643749	0.73593	1	0.0630425	0.738267	1	3.176	3.063	2.97	4.027	4.531	10.061
12332	Capg	NM_007599	chr6	72494385	72512977	+	1235	1	Capg|gCap39|mbh1|-|6|6 C3|protein-coding	-0.922532	0.114281	1	1.32894	0.0227455	0.17661	3.19127	3.81e-19	9.14e-18	-1.32407	0.0250272	1	-0.922296	0.0992821	1	0.162	0.215	0.381	0.213	0.888	4.133
268958	Capn11	NM_001013767	chr17	45767153	45796258	-	2551	1	Capn11|-|-|17|17 B3|protein-coding	0.255598	1	1	-5.13064	0.0173887	0.144687	-5.18047	0.00786525	0.0286396	-1.55856	0.174156	1	-0.558455	0.634435	1	0.014	0.028	0.041	0.052	0	0
381122	Capn13	NM_001033444	chr17	73655804	73748636	-	2589	1	Capn13|CANP 13|Gm943|-|17|17 E2|protein-coding	2.55862	1	1	5.44775	0.00559796	0.059537	8.78096	3.13e-24	1.01e-22	0	1	1	0	1	1	0	0	0	0.006	0.049	0.587
12335	Capn3	NM_007601	chr2	120289329	120330655	+	3140	1	Capn3|AI323605|Capa-3|Capa3|Lp82|p94|-|2 E5|2 60.31 cM|protein-coding	0.0774202	0.92274	1	-1.04116	0.155696	0.674476	-2.73813	1.7e-05	0.000104836	0.819966	0.0482275	1	0.364466	0.379188	1	0.353	0.242	0.19	0.196	0.083	0.032
12337	Capn5	NM_007602	chr7	105270069	105326784	-	4483	1	Capn5|nCL-3|-|7|7 E2|protein-coding	-0.380166	0.0225322	0.469524	-1.67163	1.21e-10	7.07e-09	-1.68243	1.9e-18	4.37e-17	0.0687988	0.666551	1	-0.0355689	0.828306	1	21.377	19.694	19.627	15.735	6.11	7.069
73647	Capn9	NM_023709	chr8	127100011	127142631	+	2308	1	Capn9|2200003B16Rik|GC36|nCL-4|nCL4|-|8|8 E2|protein-coding	-0.346609	1	1	1.27459	0.11023	0.533755	4.16246	1.51e-20	3.97e-19	-0.275957	1	1	-0.778529	0.577388	1	0.031	0.021	0.036	0.028	0.083	0.768
232560	Caprin2	NM_181541	chr6	148791014	148844759	-	3676	1	Caprin2|C1qdc1|Eeg1|rng140|-|6|6 G3|protein-coding	0.760284	0.000622619	0.0300645	1.00908	0.000696872	0.0106669	1.54934	2.02e-10	2.4e-09	0.0768997	0.763431	1	0.218274	0.359151	1	0.593	0.621	0.51	0.976	1.065	1.813
353025	Caps2	NM_178278	chr10	111602732	111653611	+	2741	1	Caps2|D630005B03Rik|-|10|10 D2|protein-coding	0.331975	1	1	-2.24124	1	1	4.63886	6.7e-07	5.17e-06	0.807552	1	1	0.0757318	1	1	0.009	0.004	0.004	0.006	0	0.154
75568	Capsl	NM_029341	chr15	9365783	9395790	+	939	1	Capsl|1700028N11Rik|AW125205|-|15|15 A1|protein-coding	-0.950295	0.0354931	0.631288	-2.67036	5.57e-05	0.00118828	-3.98758	4.78e-10	5.45e-09	-0.423658	0.334965	1	-0.994284	0.0224397	0.886056	0.514	0.334	0.663	0.35	0.095	0.045
76459	Car12	NM_178396	chr9	66561493	66614652	+	3703	1	Car12|2310047E01Rik|AI314958|CA-XII|Ca12|-|9|9 C|protein-coding	0.96516	2.6e-08	4.46e-06	2.13573	1.99e-11	1.29e-09	2.1985	9.8e-27	3.53e-25	0.0889945	0.587089	1	0.0743667	0.657412	1	10.406	10.168	9.469	18.854	43.924	50.235
71934	Car13	NM_024495	chr3	14641727	14663002	+	2290	1	Car13|2310075C21Rik|Ca13|-|3|3 A2|protein-coding	2.47617	1	1	2.52715	1	1	5.06502	0.0131027	0.0453352	2.30369	1	1	3.61541	0.304678	1	0.005	0.016	0	0.007	0.006	0.049
12350	Car3	NM_007606	chr3	14863538	14872373	+	1520	1	Car3|BB219044|Ca3|Car-3|-|3 3.22 cM|3 A2|protein-coding	5.13e-15	1	1	4.06595	0.239006	0.857622	6.78896	1.76e-07	1.48e-06	0	1	1	0	1	1	0	0	0	0	0.025	0.25
12354	Car7	NM_001301164	chr8	107058600	107074243	+	1934	1	Car7|AV343731|Ca7|-|8|8 D1|protein-coding	1.75457	1.09e-05	0.000973683	3.0891	4.26e-13	3.51e-11	3.68442	1.34e-30	5.82e-29	0.0594523	1	1	0.0847489	1	1	0.188	0.161	0.117	0.493	1.265	2.284
108723	Card11	NM_175362	chr5	141348953	141476550	-	4085	1	Card11|0610008L17Rik|2410011D02Rik|BIMP3|CARMA1|-|5|5 G2|protein-coding	0.360334	1	1	0.763817	0.796061	1	5.52002	4.33e-27	1.58e-25	-0.592625	1	1	2.31464	0.0130447	0.63955	0.006	0.047	0.009	0.012	0.012	0.499
239319	Card6	NM_001163138	chr15	5047439	5058533	-	4525	1	Card6|D730008L15|-|15|15 A1|protein-coding	0.826591	0.00496885	0.153977	2.32071	1.15e-08	5.03e-07	3.88286	4.25e-61	5.24e-59	-0.163016	0.672018	1	0.177029	0.594481	1	0.164	0.203	0.177	0.323	0.935	3.033
67383	Carnmt1	NM_026120	chr19	18745270	18779282	+	2084	1	Carnmt1|2410127L17Rik|-|19|19 E1|protein-coding	-0.115241	0.47456	1	-0.570104	0.0217878	0.17094	-1.1121	5.26e-12	7.4e-11	-0.0373983	0.813745	1	-0.0595171	0.706824	1	18.965	18.439	18.579	17.737	11.983	10.034
107239	Carns1	NM_134148	chr19	4164324	4175479	-	3956	1	Carns1|AI790298|Atpgd1|mKIAA1394|-|19|19 A|protein-coding	0.0962418	0.706514	1	-0.446147	0.145864	0.645609	1.80736	5.35e-18	1.19e-16	0.23455	0.293344	1	0.397757	0.107194	1	1.017	1.081	0.838	0.935	0.603	3.381
140721	Caskin2	NM_080643	chr11	115660666	115674906	-	4700	1	Caskin2|1600028L06Rik|mKIAA1139|-|11|11 E2|protein-coding	-0.337221	0.666442	1	0.626734	0.389379	1	2.08199	2.81e-08	2.61e-07	-0.0650245	1	1	-0.660475	0.263888	1	0.06	0.039	0.06	0.049	0.1	0.299
12364	Casp12	NM_009808	chr9	5345476	5373034	+	2592	1	Casp12|-|-|9 A1|9 2.46 cM|protein-coding	0.901202	0.423825	1	1.08376	0.370004	1	2.24885	0.00402264	0.0156322	2.31688	0.000635718	0.101914	1.80363	0.0185552	0.789714	0.123	0.084	0.023	0.044	0.049	0.13
12372	Casq1	NM_009813	chr1	174140025	174150026	-	1861	1	Casq1|CSQ|CSQ-1|CSQ1|sCSQ|-|1 H3|1 79.54 cM|protein-coding	2.16854	0.00768041	0.217539	2.56748	0.00110561	0.0157597	3.25418	8.94e-07	6.78e-06	1.22713	0.218036	1	1.02973	0.444106	1	0.063	0.052	0.025	0.124	0.151	0.295
320664	Cass4	NM_001080820	chr2	172219294	172259257	+	3696	1	Cass4|F730031O20Rik|-|2|2 H3|protein-coding	0.186638	0.791431	1	1.24335	0.00694669	0.0711444	4.14061	7.1e-35	3.75e-33	0.0987242	1	1	0.592625	0.196913	1	0.092	0.127	0.083	0.098	0.193	1.708
69743	Casz1	NM_001159344	chr4	148178501	148329001	+	7943	1	Casz1|2410019P08Rik|AV096627|BC040081|Cst|D4Ertd432e|-|4 E2|4 78.87 cM|protein-coding	0.423079	0.336627	1	0.438622	0.388211	1	1.18259	0.00173173	0.0072688	0.641379	0.0932264	1	0.0542903	1	1	0.081	0.053	0.05	0.07	0.067	0.133
100503659	Cbarp	NR_036582	chr10	79593179	79602112	-	3283	1	Cbarp|9630008F14|Dos|R29144/1|-|10|10 C1|protein-coding	0.279048	0.140182	1	0.263924	0.32822	1	1.12839	2.44e-09	2.57e-08	0.215899	0.280391	1	0.269753	0.173634	1	2.487	2.439	2.038	2.567	2.353	4.991
12398	Cbfa2t3	NM_009824	chr8	125149036	125223009	-	7636	1	Cbfa2t3|A630044F12Rik|AI465270|AW229127|Cbfa2t3h|ETO-2|Eto2|MTGR2|-|8|8 E1|protein-coding	-1.35267	6.68e-09	1.31e-06	-2.58914	2.51e-16	2.99e-14	-2.36958	4.05e-24	1.3e-22	0.315905	0.0853795	1	0.129635	0.489726	1	1.211	1.043	0.941	0.388	0.15	0.21
229905	Ccbl2	NM_001293560	chr3	142364012	142407875	+	2259	1	Ccbl2|KATIII|Kat3|-|3|3 H1|protein-coding	0.176542	0.264121	1	-0.155738	0.518517	1	-1.10228	4.14e-11	5.31e-10	-0.00245	0.991764	1	0.035202	0.835105	1	11.542	11.802	11.124	12.942	9.938	6.001
622404	Ccdc107	NM_001037913	chr4	43506237	43508793	+	806	1	Ccdc107|-|-|4|4 B1|protein-coding	-0.369341	0.167756	1	-0.0971897	0.820484	1	-1.00626	0.000258407	0.00128016	-0.538089	0.040747	1	-0.368317	0.171346	1	18.89	20.443	25.652	20.809	20.925	15.249
240261	Ccdc112	NM_001160399	chr18	46441805	46471582	-	2789	1	Ccdc112|8430438M01Rik|AW108467|-|18|18 C|protein-coding	-2.18578	1	1	4.07628	0.000319637	0.00550076	3.43533	0.00507941	0.0193175	-0.0616537	1	1	2.3762	0.159971	1	0.004	0.026	0.004	0	0.087	0.066
211535	Ccdc114	NM_001033243	chr7	53183768	53204326	+	2438	1	Ccdc114|-|-|7|7 B4|protein-coding	0.332041	1	1	0.891433	1	1	3.98289	0.000200959	0.00101883	-0.0307192	1	1	1.84588	0.418768	1	0.005	0.02	0.005	0.007	0.01	0.11
76872	Ccdc116	NM_029779	chr16	17139157	17144516	-	3867	1	Ccdc116|4930432J16Rik|-|16|16 B1|protein-coding	-0.102321	1	1	0.639792	0.478532	1	1.49341	0.00940629	0.0335997	-0.00395036	1	1	0.245405	0.800075	1	0.043	0.047	0.043	0.038	0.066	0.138
76041	Ccdc125	NM_183115	chr13	101439436	101467195	+	2691	1	Ccdc125|5830436D01Rik|AL023012|-|13|13 D1|protein-coding	-0.163176	0.832118	1	-1.0816	0.0301955	0.218248	1.01539	0.00391977	0.0152596	-0.372033	0.37432	1	-0.824171	0.0659831	1	0.152	0.107	0.194	0.179	0.092	0.442
545428	Ccdc141	NM_001025576	chr2	76847963	77008692	-	6303	1	Ccdc141|2610301F02Rik|CAMDI|ENSMUSG00000075261|-|2|2 C3|protein-coding	-0.850789	4.05e-07	5.24e-05	-2.4859	4.76e-21	8.54e-19	-3.10011	1.58e-52	1.56e-50	0.131564	0.407748	1	0.186167	0.248197	1	5.16	5.269	4.548	2.611	0.797	0.611
216516	Ccdc157	NM_177616	chr11	4041127	4060296	-	5137	1	Ccdc157|4930562D19Rik|mKIAA1656|-|11|11 A1|protein-coding	0.0414974	0.892502	1	0.679771	0.0240087	0.18286	1.42607	1.35e-10	1.64e-09	0.291298	0.205957	1	0.489069	0.0371643	1	0.769	0.86	0.613	0.651	0.958	1.895
223648	Ccdc166	NM_001163518	chr15	75810302	75812715	-	2411	1	Ccdc166|2410075B13Rik|-|15|15 D3|protein-coding	0.414914	0.802231	1	0.542223	0.686376	1	2.36093	7.47e-05	0.000409353	0.128065	1	1	-0.507286	0.584605	1	0.041	0.026	0.036	0.05	0.05	0.22
622665	Ccdc17	NM_001037916	chr4	116269335	116272871	+	1988	1	Ccdc17|-|-|4|4 D1|protein-coding	0.275828	0.531553	1	0.770367	0.106135	0.521553	1.32222	0.000125056	0.000659044	0.0250222	1	1	0.108873	0.761185	1	0.213	0.219	0.201	0.248	0.353	0.587
75051	Ccdc173	NM_001077684	chr2	69596114	69627543	-	1720	1	Ccdc173|4930525K21Rik|4930578N16Rik|-|2|2 C2|protein-coding	0.110823	0.875647	1	0.948584	0.00863491	0.0847525	1.31923	2.59e-06	1.82e-05	-0.332147	0.354617	1	-0.650567	0.0665678	1	0.356	0.281	0.431	0.488	0.83	1.251
73254	Ccdc18	NM_028481	chr5	108561933	108661968	+	4626	1	Ccdc18|1700021E15Rik|4932411G06Rik|NY-SAR-41|-|5|5 E5|protein-coding	-0.626821	0.000503915	0.0252978	-1.44638	8.29e-08	3.12e-06	-2.01672	7.26e-27	2.63e-25	0.0979714	0.579745	1	0.117246	0.511389	1	10.68	10.748	9.704	6.409	3.602	2.754
213993	Ccdc186	NM_170757	chr19	56865453	56888173	-	2738	1	Ccdc186|1810028B20Rik|A630007B06Rik|AI159700|Otg1|-|19|19 D2|protein-coding	0.514829	0.00947643	0.252652	1.26536	2.96e-05	0.000670245	1.5164	9.08e-15	1.61e-13	-0.00735662	0.985208	1	-0.0949655	0.671153	1	1.697	1.571	1.648	2.414	4.074	5.449
68201	Ccdc34	NM_026613	chr2	109857974	109885482	+	2071	1	Ccdc34|2810027O19Rik|4930522P10Rik|AI596202|-|2|2 E3|protein-coding	-0.240931	0.190067	1	-0.256901	0.334217	1	-1.26499	4.07e-12	5.79e-11	0.0584105	0.744466	1	0.0224122	0.904077	1	26.157	24.662	23.815	20.889	19.15	11.659
237465	Ccdc38	NM_175488	chr10	93003377	93047071	+	3637	1	Ccdc38|4933417K05Rik|-|10|10 C2|protein-coding	-0.108383	0.607345	1	0.101049	0.73639	1	-1.0714	2.3e-07	1.9e-06	-0.282413	0.165598	1	-0.192768	0.351366	1	12.999	13.761	14.895	14.363	15.093	8.39
207607	Ccdc40	NM_175430	chr11	119089886	119126526	+	4958	1	Ccdc40|B930008I02Rik|-|11|11 E2|protein-coding	0.159675	0.762224	1	-0.48884	0.36025	1	-1.33993	0.0122435	0.0426635	0.18458	0.656867	1	-0.0776088	0.851087	1	0.112	0.093	0.095	0.109	0.067	0.043
381045	Ccdc58	NM_198645	chr16	36071746	36092204	+	1089	1	Ccdc58|A930007B11Rik|AI413631|-|16|16 B3|protein-coding	-0.2508	0.168316	1	-0.312192	0.3065	0.978127	-1.17694	1.01e-09	1.12e-08	-0.148568	0.405673	1	-0.203217	0.271418	1	35.092	33.367	36.422	31.531	26.771	18.414
76551	Ccdc6	NM_001111121	chr10	69559869	69655948	+	5500	1	Ccdc6|2810012H18Rik|AA536681|AA960498|AW061011|-|10|10 B5.3|protein-coding	0.161066	0.376485	1	0.348298	0.216908	0.817333	1.00638	4.4e-08	3.99e-07	0.240619	0.173389	1	0.18941	0.293061	1	14.29	13.561	11.754	13.516	15.272	27.126
330188	Ccdc63	NM_001289811	chr5	122558061	122584902	-	2130	1	Ccdc63|4921511C16Rik|-|5|5 F|protein-coding	2.26784	0.306929	1	2.49373	0.23576	0.85183	3.44585	0.00399233	0.015527	-2.32849	1	1	-2.30153	1	1	0	0	0.006	0.032	0.044	0.09
105833	Ccdc65	NM_153518	chr15	98538658	98553764	+	1867	1	Ccdc65|4933417K04Rik|AI428139|AU020178|NYD-SP28|-|15|15 F1|protein-coding	2.4779	1	1	3.99915	0.332435	1	5.06316	0.0136901	0.0470832	4.05768	0.150831	1	0	1	1	0.025	0	0	0.009	0.027	0.06
75453	Ccdc7b	NM_029292	chr8	131591034	131707632	+	1035	1	Ccdc7b|1700008F21Rik|-|8|8 E2|protein-coding	-0.636479	0.219227	1	-0.731856	0.149029	0.655771	-2.81717	9.99e-06	6.41e-05	-1.69247	0.00138108	0.178552	-1.22972	0.00987809	0.536204	0.136	0.187	0.432	0.286	0.259	0.068
240514	Ccdc85b	NM_198616	chr19	5453163	5457563	-	4398	1	Ccdc85b|AI842788|BB115872|-|19|19 A|protein-coding	-0.266518	0.140331	1	-0.616411	0.0372113	0.253634	-1.19928	1.32e-08	1.28e-07	-0.045417	0.786067	1	0.0948072	0.579976	1	5.241	5.614	5.158	4.408	3.078	2.622
668158	Ccdc85c	NM_001159910	chr12	109444555	109513627	-	1539	1	Ccdc85c|EG668158|Gm265|Gm9010|-|12|12 F1|protein-coding	-0.266299	0.0919719	1	-0.888627	0.000483434	0.00781784	-1.03995	8.23e-09	8.16e-08	0.0832535	0.588769	1	0.0730371	0.648839	1	17.194	16.554	15.573	13.484	7.96	8.79
78317	Ccdc88b	NM_001081291	chr19	6919113	6932701	-	4930	1	Ccdc88b|2610041P08Rik|Ccdc88|-|19|19 A|protein-coding	0.118542	0.474539	1	-0.171602	0.532751	1	1.00988	1.75e-09	1.88e-08	0.0393145	0.814897	1	0.121113	0.468435	1	14.308	14.727	13.485	15.069	12.355	31.334
68339	Ccdc88c	NM_026681	chr12	102150910	102267193	-	6260	1	Ccdc88c|0610010D24Rik|AV000935|AW324073|Daple|mKIAA1509|-|12|12 E|protein-coding	-0.0801063	0.700835	1	-0.951073	0.000738713	0.0111863	-1.00545	3.17e-07	2.56e-06	0.267342	0.171124	1	0.278279	0.14668	1	9.334	9.23	7.571	7.499	3.981	4.313
215707	Ccdc92	NM_144819	chr5	125314802	125342591	-	2250	1	Ccdc92|AW050178|D5Bwg0834e|-|5 F|5 63.85 cM|protein-coding	-0.0687928	0.679866	1	-0.915499	0.00028826	0.00503812	-1.19922	7.69e-12	1.07e-10	0.132003	0.412576	1	0.236029	0.147187	1	10.595	11.2	9.325	9.186	4.952	4.694
70829	Ccdc93	NM_001025156	chr1	123327644	123403037	+	7230	1	Ccdc93|4633402D15Rik|9230102M16Rik|-|1|1 E2|protein-coding	0.373301	0.0222886	0.465659	0.851601	0.00191682	0.0249021	1.16442	1.27e-11	1.73e-10	0.0662591	0.690159	1	0.0825533	0.625362	1	3.312	3.318	3.053	4.08	5.725	7.916
20302	Ccl3	NM_011337	chr11	83461345	83462880	-	785	1	Ccl3|AI323804|G0S19-1|LD78alpha|MIP-1alpha|MIP1-(a)|MIP1-alpha|Mip1a|Scya3|-|11 C|11 51.04 cM|protein-coding	-0.109034	1	1	-2.67032	0.0222016	0.173057	-2.81298	0.00332315	0.0131434	0.979234	0.0545352	1	1.34548	0.00992907	0.537757	0.495	0.6	0.24	0.23	0.032	0.036
20305	Ccl6	NM_009139	chr11	83401388	83406589	-	1430	1	Ccl6|MRP-1|Scya6|c10|-|11 C|11 50.85 cM|protein-coding	-1.47287	0.37183	1	-1.21411	0.400938	1	3.02249	1.68e-09	1.8e-08	-1.40025	0.255708	1	-5.04388	0.0121762	0.617775	0.025	0	0.066	0.023	0.027	0.639
239083	Ccnb1ip1	NM_001111119	chr14	51408924	51415403	-	1502	1	Ccnb1ip1|Gm288|Hei10|mei4|-|14|14 C1|protein-coding	0.182139	0.309497	1	-1.02277	7.82e-05	0.00161355	-1.57997	1.96e-18	4.5e-17	0.00431778	0.984723	1	0.155107	0.350348	1	10.333	11.203	9.884	11.418	4.66	3.848
12443	Ccnd1	NM_007631	chr7	152115836	152125830	-	3789	1	Ccnd1|AI327039|CycD1|Cyl-1|PRAD1|bcl-1|cD1|-|7 F5|7 88.92 cM|protein-coding	-0.462969	0.00378784	0.124435	-1.38124	6.91e-08	2.64e-06	-1.94313	2.35e-29	9.6e-28	-0.0422072	0.78626	1	0.0473226	0.769145	1	21.532	22.773	21.281	16.144	8.236	6.417
12448	Ccne2	NM_001282943	chr4	11118856	11131926	+	3012	1	Ccne2|-|-|4|4 A2|protein-coding	-0.32567	0.101584	1	-0.34945	0.223518	0.831648	-1.37461	6.78e-12	9.49e-11	-0.242244	0.205441	1	-0.270458	0.165471	1	13.512	13.119	15.098	12.534	11.216	6.873
12452	Ccng2	NM_007635	chr5	93696599	93705257	+	2484	1	Ccng2|-|-|5|5 E3.3-F1.3|protein-coding	0.467764	0.00697025	0.20107	2.62277	3.48e-22	7.15e-20	2.64221	9.36e-56	9.92e-54	0.255636	0.126301	1	0.147452	0.404339	1	4.974	4.484	3.989	5.673	23.166	29.02
240665	Ccnj	NM_172839	chr19	40905769	40923060	+	3809	1	Ccnj|D430039C20Rik|-|19|19 C3|protein-coding	0.281711	0.0945185	1	0.909468	0.000169792	0.0032099	1.83649	1.82e-27	6.8e-26	0.187583	0.25427	1	0.0939446	0.58485	1	3.769	3.495	3.178	3.963	5.88	13.199
72278	Ccpg1	NM_001286544	chr9	72833311	72863806	+	3058	1	Ccpg1|1700030B06Rik|1810073J13Rik|9430028F23Rik|AI426686|AI875170|CPR8|D9Ertd392e|-|9 D|9 40.08 cM|protein-coding	0.400689	0.017849	0.404158	0.608082	0.0544667	0.333103	1.71077	1.84e-23	5.73e-22	0.14067	0.414232	1	0.158422	0.370548	1	3.032	3.007	2.615	3.574	4.16	9.871
546143	Ccpg1os	NM_001198789	chr9	72827533	72833183	-	703	1	Ccpg1os|EG546143|Gm5918|-|9|9 D|protein-coding	0.0781736	0.827509	1	1.4547	0.000187996	0.00348822	1.79126	3.64e-12	5.21e-11	-0.0421091	0.898585	1	-0.255241	0.446162	1	1.255	1.065	1.237	1.357	3.119	5.001
12773	Ccr4	NM_009916	chr9	114399434	114405662	-	2783	1	Ccr4|C-C CKR-4|CHEMR1|Cmkbr4|LESTR|Sdf1r|-|9 F3|9 64.49 cM|protein-coding	-1.04467	2.55e-07	3.57e-05	-2.68234	6.79e-13	5.39e-11	-2.93967	1.87e-29	7.74e-28	-0.0682857	0.72759	1	-0.0744903	0.726401	1	1.924	1.849	1.939	0.981	0.316	0.293
12769	Ccr9	NM_001166625	chr9	123676329	123692575	+	4386	1	Ccr9|A130091K22Rik|Cmkbr10|GPR-9-6|-|9 74.33 cM|9 F|protein-coding	-0.873549	8.12e-05	0.00542557	-4.25813	6.82e-26	1.73e-23	-3.43064	3.92e-33	1.92e-31	0.778225	0.0001588	0.0342867	0.209658	0.318294	1	2.746	1.798	1.557	0.879	0.077	0.16
235505	Cd109	NM_153098	chr9	78463353	78564067	+	5832	1	Cd109|9930012E15Rik|AI480638|GARP|-|9|9 E1|protein-coding	2.47588	1	1	5.3392	0.0469919	0.298788	5.94344	0.000720713	0.00327	2.29501	1	1	0	1	1	0.002	0	0	0.003	0.015	0.036
12476	Cd151	NM_009842	chr7	148653261	148657380	+	1894	1	Cd151|PETA-3|SFA-1|Tspan24|-|7 F5|7 86.82 cM|protein-coding	-0.248647	0.145212	1	0.591957	0.0175116	0.145221	1.04879	2.35e-10	2.77e-09	-0.053794	0.747528	1	0.0683263	0.696117	1	11.374	11.992	11.185	10.162	16.336	27.512
54215	Cd160	NM_018767	chr3	96602686	96618444	-	2506	1	Cd160|AU045688|By55|-|3|3 F2.1|protein-coding	-1.03574	2.09e-09	4.56e-07	-3.31497	9.95e-29	3.28e-26	-3.85097	3.83e-52	3.73e-50	-0.334671	0.0533476	1	-0.211114	0.218349	1	11.869	12.861	14.217	7.29	1.353	1.15
244233	Cd163l1	NM_172909	chr7	147404166	147417044	+	3438	1	Cd163l1|B430307C05|E430002D04Rik|Scart1|-|7|7 F4|protein-coding	0.155357	0.640871	1	-2.99593	1.38e-09	7.03e-08	-3.81993	1.43e-14	2.49e-13	0.669514	0.0283655	1	0.690106	0.030149	1	1.01	0.977	0.622	0.708	0.074	0.049
17470	Cd200	NM_010818	chr16	45382248	45409166	-	2339	1	Cd200|Mox2|OX2|-|16 29.53 cM|16 A1|protein-coding	-1.15557	6.74e-09	1.31e-06	-1.32986	3.07e-06	8.57e-05	-2.37284	2.32e-25	7.9e-24	-0.433571	0.0518493	1	-0.182768	0.448276	1	1.932	2.371	2.498	1.167	0.997	0.559
57781	Cd200r1	NM_021325	chr16	44765849	44795090	+	1882	1	Cd200r1|CD200R|Mox2r|OX2R|-|16|16|protein-coding	-3.91667	0.154984	1	1.47032	0.256569	0.890805	5.41122	1.2e-30	5.22e-29	-1.82632	0.407808	1	-4.10229	0.155985	1	0.006	0	0.025	0	0.075	1.315
271375	Cd200r2	NM_206535	chr16	44867210	44915953	+	1742	1	Cd200r2|AY230198|Cd200r1l|-|16|16 B4|protein-coding	2.47781	1	1	5.1767	0.0221821	0.173018	9.47717	4.97e-33	2.42e-31	0	1	1	0	1	1	0	0	0	0.009	0.066	1.413
74603	Cd200r3	NM_001128132	chr16	44943791	44966403	+	1614	1	Cd200r3|4733401I18Rik|4833409J19Rik|AI505817|BB106877|mCD200RLb|-|16|16 B4-B5|protein-coding	5.98306	0.000193349	0.0113126	5.74648	0.00135228	0.0186138	6.12806	6.31e-05	0.000350701	0	1	1	0	1	1	0	0	0	0.153	0.119	0.161
239849	Cd200r4	NM_207244	chr16	44820841	44839263	+	1692	1	Cd200r4|F630107N04Rik|MCD200RLa|-|16|16 B4|protein-coding	0.0352956	1	1	1.06739	0.174991	0.722033	4.35311	5.97e-26	2.08e-24	-5.04495	0.0166147	0.92915	-2.66078	0.068711	1	0	0.007	0.056	0.058	0.113	1.355
225825	Cd226	NM_178687	chr18	89366819	89439719	+	2478	1	Cd226|BC051526|DNAM-1|DNAM1|Pta1|TLiSA1|-|18|18 E4|protein-coding	-0.738687	0.000729507	0.0341897	-1.97848	3.65e-10	2.01e-08	-2.83031	3.64e-26	1.28e-24	0.341033	0.117668	1	0.380821	0.0603655	1	2.113	2.101	1.603	1.009	0.401	0.261
18106	Cd244	NM_018729	chr1	173489324	173515447	+	3747	1	Cd244|2B4|C9.1|F730046O15Rik|Ly90|NAIL|NKR2B4|Nmrk|SLAMF4|-|1 H3|1 79.52 cM|protein-coding	0.814602	0.31925	1	3.0029	2.65e-05	0.000607024	4.2172	5.78e-16	1.12e-14	-1.60348	0.15866	1	-6.19208	0.00268888	0.226064	0.019	0	0.053	0.101	0.459	1.201
12503	Cd247	NM_001113391	chr1	167718812	167792243	+	1676	1	Cd247|4930549J05Rik|A430104F18Rik|AW552088|Cd3|Cd3-eta|Cd3-zeta|Cd3h|Cd3z|Cd3zeta|T3z|Tcrk|Tcrz|-|1 73.14 cM|1 G-H|protein-coding	-0.424174	0.011646	0.29901	-0.707814	0.00448984	0.0498179	-1.10404	9.19e-11	1.13e-09	0.0737844	0.637853	1	0.102131	0.525688	1	44.179	44.854	40.2	31.66	23.96	21.723
102657	Cd276	NM_133983	chr9	58372107	58388747	-	3176	1	Cd276|6030411F23Rik|AU016588|B7RP-2|B7h3|-|9|9 B|protein-coding	1.5344	0.516909	1	0.998632	0.729534	1	3.46611	0.000137701	0.000720789	-3.22142	0.530056	1	-0.817527	1	1	0	0.004	0.007	0.026	0.016	0.106
12487	Cd28	NM_007642	chr1	60803232	60830203	+	4311	1	Cd28|-|-|1 30.52 cM|1 C1-C3|protein-coding	-0.0967975	0.556068	1	-0.51364	0.0440827	0.28658	-1.08855	1.98e-09	2.11e-08	0.460278	0.00373078	0.383394	0.281921	0.0977848	1	11.449	9.724	8.046	7.747	5.719	4.358
217303	Cd300a	NM_170758	chr11	114751355	114765965	+	4633	1	Cd300a|B230315M08Rik|Clm8|LMIR1|MAIR-I|MAIR-Ia|MMAC8|Pigr4|mcpir1|-|11 E2|11 80.54 cM|protein-coding	0.426999	0.802742	1	1.80615	0.00984086	0.0939433	2.28089	0.000175245	0.000898725	-0.0537239	1	1	0.730308	0.521318	1	0.018	0.031	0.018	0.025	0.063	0.103
246746	Cd300lf	NM_145634	chr11	114977528	114995306	-	1855	1	Cd300lf|CLIM1|CLM-1|CLM1|Digr2|F730004D16Rik|IREM1|IgSF13|LMIR3|Pigr3|-|11|11 E2|protein-coding	0.619733	0.175295	1	0.406966	0.391411	1	1.20319	0.000723962	0.0032835	-3.40829	2.13e-06	0.000883403	-3.86511	3.95e-06	0.00123386	0.019	0.013	0.209	0.337	0.261	0.561
54219	Cd320	NM_019421	chr17	33980036	33986719	+	2202	1	Cd320|425O18-1|8D6|D17Ertd716e|NG29|TCblR|VLDL|-|17 B1|17 17.98 cM|protein-coding	-0.229797	0.320438	1	-0.183327	0.603136	1	-1.05211	6.55e-06	4.34e-05	-0.174166	0.42443	1	-0.219614	0.324854	1	6.337	6.002	6.747	5.959	5.396	3.845
12493	Cd37	NM_007645	chr7	52489002	52494209	-	1216	1	Cd37|Tspan26|-|7 B4|7 29.2 cM|protein-coding	0.0182889	0.927335	1	0.831494	0.000563629	0.00891096	2.10507	7.71e-38	4.57e-36	0.0924576	0.550125	1	0.101275	0.521641	1	20.668	20.375	18.617	19.959	33.17	93.073
16423	Cd47	NM_010581	chr16	49855767	49911796	+	1902	1	Cd47|9130415E20Rik|AA407862|AI848868|AW108519|B430305P08Rik|IAP|Itgp|-|16|16 B5|protein-coding	0.00460084	0.979013	1	-1.12385	1.6e-05	0.000387413	-1.52886	1.19e-17	2.6e-16	-0.0625656	0.69043	1	0.0233268	0.885572	1	56.201	58.248	56.132	59.003	24.658	22.639
23833	Cd52	NM_013706	chr4	133649453	133650988	-	499	1	Cd52|AI463198|B7|B7-Ag|CAMPATH-1|CLS1|MB7|-|4 D3|4 66.5 cM|protein-coding	-0.26287	0.410245	1	1.70997	8.12e-07	2.55e-05	3.41188	1.55e-27	5.83e-26	-0.19988	0.550282	1	-0.154376	0.673674	1	3.843	3.801	4.169	3.691	13.77	52.841
12508	Cd53	NM_007651	chr3	106561779	106593067	-	2792	1	Cd53|AI323659|Ox-44|Tspan25|-|3 F2.3|3 46.53 cM|protein-coding	-0.750843	0.00265863	0.094574	-0.830912	0.011904	0.108471	1.14492	1e-07	8.69e-07	-1.52145	9.81e-09	6.33e-06	-1.1676	2.08e-05	0.00505342	0.379	0.467	1.04	0.642	0.566	2.695
12512	Cd63	NM_001042580	chr10	128345975	128349874	+	930	1	Cd63|C75951|ME491|Tspan30|-|10 D3|10 77.19 cM|protein-coding	2.64324	0.0265508	0.520348	4.9098	3.8e-10	2.08e-08	4.51038	1.37e-13	2.22e-12	-0.592662	1	1	2.10301	0.0654641	1	0.026	0.163	0.04	0.333	1.075	1.107
12514	Cd68	NM_001291058	chr11	69477715	69479672	-	1239	1	Cd68|Lamp4|Scard1|gp110|-|11 B3|11 42.86 cM|protein-coding	0.598035	0.0539885	0.797458	1.82083	1.26e-07	4.62e-06	3.53686	2.09e-44	1.6e-42	-0.208432	0.585197	1	0.228342	0.472506	1	0.56	0.721	0.626	0.969	2.212	8.456
12515	Cd69	NM_001033122	chr6	129217343	129225387	-	1613	1	Cd69|5830438K24Rik|AI452015|AIM|VEA|-|6 F3|6 63.21 cM|protein-coding	-0.0979069	1	1	-1.72275	0.0133445	0.118194	-2.02613	0.00188719	0.00785278	-0.228943	0.799494	1	0.165139	0.719233	1	0.168	0.217	0.189	0.183	0.055	0.052
12516	Cd7	NM_009854	chr11	120898063	120900792	-	1034	1	Cd7|-|-|11 E2|11 84.85 cM|protein-coding	0.474615	0.0119739	0.304382	3.11914	1.54e-27	4.45e-25	2.3851	1.4e-33	7.05e-32	-0.737803	0.000146953	0.0321252	-0.564682	0.00517757	0.350469	10.219	11.566	16.165	23.233	141.511	99.431
12517	Cd72	NM_001110320	chr4	43460596	43467498	-	1492	1	Cd72|CD72c|Ly-19|Ly-32|Ly-m19|Lyb-2|-|4 B1|4 23.04 cM|protein-coding	0.148959	0.626329	1	-0.0838848	0.843654	1	1.53171	1.6e-09	1.72e-08	0.44297	0.115703	1	0.537396	0.0504598	1	1.122	1.189	0.807	0.916	0.729	2.553
16149	Cd74	NM_001042605	chr18	60963503	60972306	+	1404	1	Cd74|CLIP|DHLAG|HLADG|Ia-GAMMA|Ii|-|18 E1|18 34.41 cM|protein-coding	1.32019	2.17e-06	0.000227947	1.9775	5.66e-07	1.82e-05	3.44269	1.05e-41	7.18e-40	0.0598583	0.912555	1	2.06884	1.32e-08	8.79e-06	0.727	3.087	0.669	1.708	2.438	8.556
12518	Cd79a	NM_007655	chr7	25682530	25687216	+	1320	1	Cd79a|Ig-alpha|Iga|Igalpha|Ly-54|Ly54|mb-1|-|7 A3|7 13.49 cM|protein-coding	3.18397	3.42e-05	0.0025657	2.9097	0.00766472	0.0768293	3.35238	4.62e-06	3.13e-05	0.334899	1	1	4.20316	7.79e-11	9.37e-08	0.036	0.558	0.027	0.274	0.183	0.341
12519	Cd80	NM_009855	chr16	38459013	38487014	+	1693	1	Cd80|B71|Cd28l|Ly-53|Ly53|MIC17|TSA1|-|16 26.86 cM|16 B5|protein-coding	-2.18567	1	1	2.17991	0.374674	1	6.61306	2.38e-25	8.11e-24	-2.36062	1	1	-0.0503817	1	1	0	0.007	0.007	0	0.03	0.988
12521	Cd82	NM_001271432	chr2	93259259	93302659	-	1907	1	Cd82|AA682076|AL023070|C33|IA4|Kai1|Tspan27|-|2 E1|2 51.62 cM|protein-coding	-0.338468	0.0390929	0.667662	-1.46361	2.53e-08	1.03e-06	-2.13926	2.49e-31	1.12e-29	-0.429085	0.00763475	0.60743	-0.4085	0.0135589	0.650441	73.818	73.968	94.564	78.062	33.513	25.057
12523	Cd84	NM_001289470	chr1	173769828	173820849	+	3278	1	Cd84|A130013D22Rik|CDw84|SLAMF5|-|1 H3|1 79.54 cM|protein-coding	-2.53385	5.73e-05	0.00401778	-2.34191	0.000847175	0.0125676	-2.09802	0.000276834	0.00136443	-3.01133	2.68e-06	0.00103952	-2.71614	5.57e-06	0.00167576	0.018	0.022	0.143	0.025	0.027	0.039
12524	Cd86	NM_019388	chr16	36603955	36666163	-	2529	1	Cd86|B7|B7-2|B7.2|B70|CLS1|Cd28l2|ETC-1|Ly-58|Ly58|MB7|MB7-2|TS/A-2|-|16 25.72 cM|16 B5|protein-coding	1.73865	0.645076	1	-2.2967	1	1	4.67794	2.95e-07	2.39e-06	-2.36269	1	1	-2.34143	1	1	0	0	0.005	0.02	0	0.172
12525	Cd8a	NM_001081110	chr6	71323421	71329165	+	3123	1	Cd8a|BB154331|Ly-2|Ly-35|Ly-B|Lyt-2|-|6 32.14 cM|6 C|protein-coding	1.4985	0.0477949	0.747285	1.89316	0.00501984	0.0545468	3.59864	1.58e-13	2.54e-12	1.42548	0.0314432	1	0.353589	0.817641	1	0.075	0.035	0.026	0.079	0.098	0.383
12526	Cd8b1	NM_009858	chr6	71272806	71287445	+	1408	1	Cd8b1|Cd8b|Ly-3|Ly-C|Lyt-3|-|6 C1|6 32.14 cM|protein-coding	1.48099	2.36e-14	1.18e-11	2.46796	5.01e-18	6.81e-16	3.53703	5.73e-72	9.57e-70	-0.204162	0.354354	1	-0.324812	0.153148	1	1.638	1.484	1.812	5.267	10.168	24.47
218294	Cdc14b	NM_172587	chr13	64293853	64376296	-	5843	1	Cdc14b|2810432N10Rik|A530086E13Rik|AA472821|CDC14B3|Cdc14B1|-|13|13 B3|protein-coding	0.428992	0.253868	1	0.36302	0.468351	1	1.74512	1.96e-09	2.09e-08	0.213999	0.570832	1	-0.249462	0.67362	1	0.116	0.078	0.101	0.141	0.13	0.373
238896	Cdc20b	NM_001281487	chr13	113825587	113881343	+	1547	1	Cdc20b|EG238896|EG622422|-|13|13 D2.2|protein-coding	-0.358852	0.676403	1	-4.47256	5.07e-06	0.000134701	-2.48169	0.000218585	0.00109804	-0.493102	0.40307	1	-0.179453	0.814575	1	0.167	0.203	0.228	0.202	0.008	0.045
57912	Cdc42se1	NM_172395	chr3	95032346	95040346	+	3121	1	Cdc42se1|1300002M12Rik|AW558204|Cdcse1|SCIP1|Spec1|-|3|3 F2.1|protein-coding	-0.254771	0.12392	1	0.579345	0.0249032	0.188021	1.25082	1.29e-13	2.1e-12	-0.14167	0.382772	1	-0.211586	0.201763	1	27.27	25.363	28.507	25.128	42.586	79.474
12544	Cdc45	NM_009862	chr16	18780540	18812065	-	2121	1	Cdc45|Cdc45l|-|16 A3|16 11.63 cM|protein-coding	0.0549609	0.730539	1	-0.160431	0.533363	1	-1.00076	4.11e-10	4.73e-09	0.0539107	0.730273	1	0.0244803	0.882489	1	36.734	36.441	34.535	37.246	31.089	19.918
23834	Cdc6	NM_001025779	chr11	98769203	98785256	+	4518	1	Cdc6|CDC18L|-|11|11 D|protein-coding	0.114015	0.484806	1	-0.377108	0.152619	0.665462	-1.02485	7.19e-10	8.03e-09	0.109404	0.493128	1	0.0448992	0.782469	1	17.618	16.585	15.761	17.579	12.361	8.942
71963	Cdca4	NM_028023	chr12	114058446	114067600	-	2415	1	Cdca4|2410018C03Rik|HEPP|SEI-3|-|12|12 F2|protein-coding	-0.103379	0.532472	1	0.0398591	0.877901	1	-1.0343	7.88e-10	8.77e-09	-0.064358	0.690861	1	-0.10224	0.53601	1	33.515	32.104	33.408	32.621	33.171	19.07
66953	Cdca7	NM_025866	chr2	72314276	72324947	+	2350	1	Cdca7|2310021G01Rik|AU044109|JPO1|-|2|2 C3|protein-coding	-0.0348667	0.828453	1	-0.364781	0.153246	0.667712	-1.11679	4.23e-12	6.01e-11	0.0139763	0.929426	1	0.0339229	0.834173	1	84.681	85.209	80.318	81.117	61.776	43.104
12550	Cdh1	NM_009864	chr8	109127268	109194146	+	4395	1	Cdh1|AA960649|ARC-1|E-cad|Ecad|L-CAM|UVO|Um|-|8 53.18 cM|8 D|protein-coding	-0.151331	0.597359	1	-2.18396	4.02e-07	1.33e-05	-2.29001	4.57e-11	5.85e-10	-0.345898	0.178554	1	0.0654865	0.879252	1	0.321	0.429	0.39	0.367	0.081	0.093
215654	Cdh12	NM_001008420	chr15	21041207	21519288	+	5625	1	Cdh12|Cdhb|-|15 A2|15 8.25 cM|protein-coding	0.355158	1	1	0.0533761	1	1	2.6996	0.00924594	0.0330908	0.472349	1	1	-0.867839	1	1	0.006	0.002	0.004	0.006	0.005	0.035
12555	Cdh15	NM_007662	chr8	125372274	125391297	+	2827	1	Cdh15|AI323380|Cdh14|Mcad|-|8 E1|8 71.99 cM|protein-coding	-1.2288	0.00830866	0.229127	-2.80488	7.75e-07	2.44e-05	-2.54788	2.1e-07	1.75e-06	-0.63665	0.0776631	1	-0.658464	0.112402	1	0.171	0.162	0.254	0.111	0.036	0.05
104010	Cdh22	NM_174988	chr2	164937007	165060237	-	3572	1	Cdh22|-|-|2|2 H3|protein-coding	-0.647877	0.55162	1	0.625503	0.337012	1	1.32797	0.0101114	0.0358996	-0.15621	1	1	-0.141221	1	1	0.046	0.044	0.049	0.032	0.075	0.146
22295	Cdh23	NM_023370	chr10	59765498	60159238	-	11020	1	Cdh23|4930542A03Rik|USH1D|ahl|ahl1|bob|bus|mdfw|nmf112|nmf181|nmf252|sals|v|-|10 B4|10 30.11 cM|protein-coding	0.0975199	0.6682	1	-2.63973	1.19e-13	1.07e-11	-2.58365	1.02e-19	2.54e-18	0.00420884	0.985482	1	-0.0514521	0.83409	1	2.176	1.998	2.13	2.35	0.352	0.403
239096	Cdh24	NM_199470	chr14	55250829	55260201	-	2714	1	Cdh24|1700040A22Rik|ENSMUSG00000022188|-|14|14 C3|protein-coding	0.336191	0.22148	1	0.460539	0.184918	0.743467	1.44701	2.82e-08	2.61e-07	0.516681	0.128262	1	0.518148	0.0901492	1	0.949	0.904	0.65	0.842	0.874	2.036
12560	Cdh3	NM_001037809	chr8	109034752	109080811	+	4019	1	Cdh3|AI385538|Cadp|Cdhp|P-cadherin|Pcad|-|8 D3|8 53.16 cM|protein-coding	-0.854521	0.0711539	0.939615	-2.57725	0.00015903	0.00303508	-2.51591	2.69e-05	0.00015993	-0.252265	0.575677	1	-0.906826	0.0704803	1	0.138	0.084	0.155	0.09	0.025	0.032
18647	Cdk14	NM_011074	chr5	4803384	5380251	-	4895	1	Cdk14|Pftk1|mKIAA0834|-|5 A1|5 2.61 cM|protein-coding	-3.9167	0.15505	1	1.9294	0.0514013	0.319145	2.28388	0.00519536	0.0197148	-0.062095	1	1	-0.0175708	1	1	0.01	0.01	0.01	0	0.036	0.057
105278	Cdk20	NM_053180	chr13	64533861	64541029	+	1817	1	Cdk20|4932702G04Rik|AU019450|AW558027|CDCH|Ccrk|PNQLARE|p42|-|13|13 B3|protein-coding	1.22639	0.000278091	0.015444	1.11286	0.00792491	0.0790093	1.9778	1.36e-10	1.64e-09	0.329052	0.445449	1	-0.126578	0.922367	1	0.33	0.233	0.252	0.615	0.554	1.161
53886	Cdkl2	NM_016912	chr5	92435100	92472068	-	4050	1	Cdkl2|5330436L21Rik|AI505225|KKIAMRE|Kkm|-|5|5 E2|protein-coding	1.25781	0.170346	1	2.18225	0.00182588	0.0239667	4.03018	3.77e-16	7.4e-15	1.49215	0.0351166	1	1.07062	0.278656	1	0.053	0.037	0.018	0.046	0.084	0.344
12575	Cdkn1a	NM_007669	chr17	29230714	29237667	+	1908	1	Cdkn1a|CAP20|CDKI|CIP1|Cdkn1|P21|SDI1|Waf1|mda6|p21Cip1|p21WAF|-|17 A3.3|17 15.12 cM|protein-coding	-1.69129	3.62e-22	5.12e-19	-1.11325	9.8e-05	0.00196866	-1.47167	1.03e-14	1.81e-13	0.402836	0.0123452	0.807604	0.378316	0.038741	1	11.575	10.833	8.415	2.706	4.056	3.53
52626	Cdkn2aipnl	NM_029976	chr11	51781133	51790838	+	1859	1	Cdkn2aipnl|A430101B06Rik|AA409260|D11Ertd497e|MNCb-1520|-|11 B1.3|11 31.78 cM|protein-coding	-0.213786	0.21943	1	-0.52594	0.0605001	0.358043	-1.13868	5.21e-11	6.62e-10	-0.159564	0.344506	1	-0.139202	0.421704	1	52.406	52.739	55.66	49.851	36.317	29.653
12585	Cdr2	NM_007672	chr7	128100550	128125826	-	2518	1	Cdr2|AA617262|-|7 F2|7 65.04 cM|protein-coding	-0.419736	0.0124888	0.311211	-1.29497	1.13e-06	3.45e-05	-1.65629	5.09e-18	1.14e-16	0.112649	0.516619	1	0.0675183	0.695256	1	9.761	9.418	8.701	6.739	3.6	3.183
67177	Cdt1	NM_026014	chr8	125091915	125097030	+	2179	1	Cdt1|2610318F11Rik|AW545653|C76791|Ris2|-|8|8 E1|protein-coding	0.12447	0.464954	1	-0.650927	0.0149066	0.128988	-1.03623	1.79e-09	1.92e-08	0.0663039	0.68406	1	0.095803	0.561771	1	57.232	57.23	52.864	60.052	34.196	29.719
321022	Cdv3	NM_175565	chr9	103255432	103268110	-	4028	1	Cdv3|2510010F10Rik|C230084J24Rik|C79446|TPP36|-|9|9 F1|protein-coding	-0.248104	0.130979	1	-0.926405	0.000470298	0.00762564	-1.26056	2.27e-14	3.9e-13	0.0624191	0.698005	1	0.0242183	0.884831	1	146.515	142.551	135.204	118.979	71.662	65.384
12590	Cdx1	NM_009880	chr18	61178516	61195853	-	1745	1	Cdx1|Cdx|Cdx-1|-|18 E1|18 34.41 cM|protein-coding	-0.566846	0.576461	1	-1.67207	0.306125	0.978127	-5.02676	0.0132987	0.0459276	-1.92775	0.133465	1	0.295073	1	1	0.013	0.069	0.054	0.038	0.015	0
75796	Cdyl2	NM_029441	chr8	119092624	119256891	-	8078	1	Cdyl2|1700029M19Rik|4930453I21Rik|Gm20194|-|8|8 E1|protein-coding	0.759515	1.49e-06	0.000164133	0.555681	0.0289059	0.211598	-1.00617	8.39e-10	9.31e-09	-0.00669775	0.968316	1	-0.0659274	0.689814	1	3.854	3.571	3.721	6.479	5.623	2.155
319930	Ceacam19	NM_177036	chr7	20461091	20473314	-	3352	1	Ceacam19|C130022P09Rik|CEAL1|-|7|7 A3|protein-coding	-0.150824	0.874423	1	1.30728	0.00744775	0.075282	1.31017	0.00238419	0.00970095	0.00919431	1	1	-0.219809	0.661393	1	0.077	0.065	0.074	0.069	0.183	0.214
109901	Cela1	NM_033612	chr15	100504853	100518351	-	1096	1	Cela1|1810009A17Rik|1810062B19Rik|Ela-1|Ela1|PC-TsF|-|15 F1-F3|15 56.38 cM|protein-coding	3.28212	0.0177055	0.401663	6.25719	9.09e-12	6.23e-10	5.96883	1.43e-16	2.89e-15	2.01856	0.290004	1	-0.0501137	1	1	0.054	0.011	0.011	0.135	0.919	0.975
242711	Cela3a	NM_001126318	chr4	136957469	136965706	-	948	1	Cela3a|Gm13011|OTTMUSG00000009877|-|4|4 D3|protein-coding	5.13e-15	1	1	6.43517	3.22e-05	0.000722787	8.44947	6.72e-20	1.7e-18	0	1	1	0	1	1	0	0	0	0	0.282	1.276
67868	Cela3b	NM_026419	chr4	136976923	136986435	-	887	1	Cela3b|0910001F22Rik|2310074F01Rik|AI504000|Ela3|Ela3b|-|4 D3|4 69.9 cM|protein-coding	4.02062	0.186539	1	7.85325	5.64e-12	4.03e-10	10.0212	6.31e-47	5.16e-45	0	1	1	0	1	1	0	0	0	0.056	0.805	4.059
319586	Celf5	NM_176954	chr10	80921973	80945454	-	4376	1	Celf5|4930565A21Rik|Brunol5|-|10|10 C1|protein-coding	-2.14702	1	1	0.0742304	1	1	3.44585	0.00399085	0.0155238	1.33745	0.647209	1	1.84575	0.418677	1	0.008	0.011	0.003	0	0.003	0.042
76183	Celf6	NM_175235	chr9	59426144	59455099	+	2751	1	Celf6|6330569O16Rik|Brunol6|-|9|9 B|protein-coding	4.87551	0.0220033	0.464633	7.33949	2.23e-08	9.12e-07	9.52392	6.32e-37	3.66e-35	0	1	1	0	1	1	0	0	0	0.036	0.167	0.925
12614	Celsr1	NM_009886	chr15	85729188	85864207	-	11013	1	Celsr1|Adgrc1|Crsh|Scy|crash|-|15 E2|15 40.42 cM|protein-coding	-0.303299	0.138509	1	-1.36136	4.46e-06	0.000120081	-1.22505	3.76e-09	3.86e-08	0.197119	0.305914	1	0.106742	0.581715	1	12.97	11.913	11.038	9.315	4.378	5.394
107934	Celsr3	NM_080437	chr9	108728651	108755300	+	11510	1	Celsr3|Adgrc3|Fmi1|flamingo|mKIAA0812|-|9|9 F2|protein-coding	0.931704	0.0688641	0.920466	3.08251	1.79e-12	1.33e-10	4.69121	1.2e-39	7.78e-38	-0.549726	0.496492	1	0.0617317	1	1	0.012	0.018	0.017	0.034	0.15	0.53
66570	Cenpm	NM_025639	chr15	82064206	82075177	-	1196	1	Cenpm|2610019I03Rik|AI853711|Pane1|-|15|15 E2|protein-coding	-0.0386229	0.81246	1	-0.0142286	0.959406	1	-1.07196	5.24e-10	5.95e-09	-0.0668454	0.680869	1	-0.0987035	0.553006	1	20.236	19.777	20.265	20.581	19.218	11.252
66336	Cenpp	NM_025495	chr13	49559428	49748100	-	1044	1	Cenpp|1700022C02Rik|4921518G09Rik|-|13|13 B1|protein-coding	-0.165007	0.497568	1	0.0601414	0.840972	1	-1.03359	7.97e-06	5.2e-05	-0.201438	0.342043	1	-0.0629575	0.768337	1	7.585	8.296	8.264	7.544	8.108	4.755
320394	Cenpt	NM_177150	chr8	108368578	108375908	-	1752	1	Cenpt|G630055P03Rik|-|8|8 D3|protein-coding	1.54211	1.58e-19	1.46e-16	3.42417	1.22e-31	4.66e-29	3.45313	1.29e-77	2.47e-75	0.0281748	0.874082	1	-0.00590225	0.98454	1	8.079	7.722	7.662	22.844	83.321	96.89
77048	Cep83	NM_029852	chr10	94151535	94253081	+	2968	1	Cep83|2600001G24Rik|4921537D05Rik|5730513H21Rik|Ccdc41|-|10|10 C2|protein-coding	0.408603	0.0123263	0.309082	0.945456	0.000181782	0.00340179	1.14341	9.8e-13	1.49e-11	-0.0312546	0.838891	1	-0.0588813	0.709427	1	16.535	16.122	16.209	22.039	31.183	41.672
228094	Cerkl	NM_001048176	chr2	79172648	79269145	-	1744	1	Cerkl|Gm1958|Rp26|-|2|2 C3|protein-coding	0.984994	0.00128783	0.0533937	1.91339	6.18e-10	3.29e-08	2.28208	1.11e-27	4.19e-26	-0.0532872	0.845602	1	-0.305281	0.25042	1	1.039	0.852	1.031	2.037	3.991	5.854
102022	Ces2a	NM_133960	chr8	107257903	107265534	+	1950	1	Ces2a|9130231C15Rik|AI266984|Ces6|-|8|8 D3|protein-coding	5.13e-15	1	1	5.13e-15	1	1	8.36251	2.44e-18	5.58e-17	0	1	1	0	1	1	0	0	0	0	0	0.585
71903	Ces2f	NM_001079865	chr8	107471256	107479862	+	1808	1	Ces2f|2310038E17Rik|A430088E12|-|8|8 D3|protein-coding	5.13e-15	1	1	5.13e-15	1	1	6.78896	1.76e-07	1.48e-06	0	1	1	0	1	1	0	0	0	0	0	0.21
72361	Ces2g	NM_197999	chr8	107485618	107493437	+	2845	1	Ces2g|2210023G05Rik|Ces2l|-|8|8 D3|protein-coding	0.165832	1	1	-0.826312	0.565996	1	2.95784	1.27e-06	9.41e-06	0.654268	0.48739	1	-0.271198	1	1	0.041	0.021	0.025	0.029	0.013	0.232
382053	Ces3a	NM_198672	chr8	107572499	107582314	+	2034	1	Ces3a|Ces3|Ces31|Es31|-|8|8 D3|protein-coding	4.29084	0.146655	1	8.46958	6.45e-17	8.08e-15	12.6271	2.76e-133	1.11e-130	0	1	1	0	1	1	0	0	0	0.035	0.559	10.84
13909	Ces3b	NM_144511	chr8	107607655	107617491	+	2050	1	Ces3b|Ces31L|Ces3L|EG13909|ES31L|Es31|Gm4738|-|8|8 D3|protein-coding	3.32932	0.535054	1	6.94987	3.85e-07	1.29e-05	11.2438	6.02e-83	1.32e-80	0	1	1	0	1	1	0	0	0	0.016	0.174	4.095
234677	Ces4a	NM_146213	chr8	107655700	107674009	+	2417	1	Ces4a|Ces8|-|8|8 D3|protein-coding	3.9409	0.277904	1	7.33102	6.85e-08	2.62e-06	10.0436	1.71e-47	1.44e-45	0	1	1	2.39973	1	1	0	0.005	0	0.02	0.185	1.513
26370	Cetn2	NM_019405	chrX	70158904	70163683	-	1179	1	Cetn2|1110034A02Rik|AI326150|Calt|caltractin|-|X 37.29 cM|X B|protein-coding	-0.252994	0.191952	1	-0.0645831	0.820319	1	-1.02109	4.58e-08	4.15e-07	-0.326468	0.0754296	1	-0.319672	0.0855932	1	30.498	30.462	36.189	31.338	32.6	21.005
227736	Cfap157	NM_025619	chr2	32632933	32639925	-	1664	1	Cfap157|1700019L03Rik|-|2|2 B|protein-coding	-0.886699	0.000513618	0.0256244	-2.01575	2.36e-08	9.6e-07	-2.64954	1.09e-19	2.7e-18	0.128049	0.564284	1	0.104361	0.634193	1	1.93	1.873	1.702	0.968	0.398	0.313
75556	Cfap161	NM_029335	chr7	90924127	90943349	-	1285	1	Cfap161|1700026D08Rik|AW047638|AW551802|-|7|7 D3|protein-coding	5.13e-15	1	1	6.51771	1.04e-05	0.000260336	10.6015	4.69e-60	5.66e-58	0	1	1	0	1	1	0	0	0	0	0.218	4.191
100048534	Cfap43	NM_027559	chr19	47811347	47911851	-	5907	1	Cfap43|4632415N18Rik|4930428C11Rik|4930463G05Rik|AI429486|D19Ertd652e|Wdr96|-|19 40.41 cM|19 D1|protein-coding	0.643846	0.210458	1	3.73867	1.38e-21	2.63e-19	4.12188	7.58e-39	4.75e-37	-0.383883	0.591708	1	0.0617029	1	1	0.038	0.051	0.048	0.075	0.639	0.974
71860	Cfap52	NM_027963	chr11	67738308	67779144	-	2185	1	Cfap52|1700019F09Rik|4933417B11Rik|WDRPUH|Wdr16|-|11|11 B3|protein-coding	2.46143	0.151262	1	6.51357	1.65e-18	2.36e-16	5.89048	3.2e-16	6.3e-15	-0.0554695	1	1	-2.34127	1	1	0.005	0	0.005	0.038	0.613	0.463
74453	Cfap53	NR_029424	chr18	74442754	74519638	+	2099	1	Cfap53|4933415I03Rik|Ccdc11|-|18|18 E2|protein-coding	0.865089	0.783099	1	3.36487	4.15e-05	0.00090471	4.01414	4.15e-10	4.76e-09	-0.069716	1	1	0.685515	0.749269	1	0.019	0.019	0.019	0.026	0.212	0.347
329375	Cfap77	NM_001166705	chr2	28811001	28910586	-	923	1	Cfap77|1700101E01Rik|Gm823|-|2|2 A3|protein-coding	2.5987	1.79e-06	0.000193119	5.84305	3.45e-32	1.43e-29	7.23187	4.72e-109	1.49e-106	0.105062	1	1	0.329831	0.829761	1	0.115	0.131	0.102	0.659	6.27	18.39
14962	Cfb	NM_001142706	chr17	34993319	34999459	-	2723	1	Cfb|AI195813|AI255840|B|Bf|C2|Fb|H2-Bf|-|17 B1|17 18.41 cM|protein-coding	0.882181	0.00513126	0.158397	0.93003	0.0133416	0.118194	1.3622	3.59e-06	2.47e-05	0.324095	0.349956	1	0.265017	0.458632	1	0.315	0.297	0.242	0.465	0.463	0.723
12628	Cfh	NM_009888	chr1	141982432	142079988	-	4341	1	Cfh|Mud-1|NOM|Sas-1|Sas1|-|1 61.62 cM|1 F|protein-coding	-3.0259	0.541257	1	-3.15542	0.565981	1	3.40369	0.000100749	0.000539217	-3.22162	0.530336	1	-3.20117	0.541676	1	0	0	0.005	0	0	0.075
18636	Cfp	NM_008823	chrX	20502580	20508681	-	1625	1	Cfp|BCFG|Pfc|-|X 16.44 cM|X A3|protein-coding	0.303388	0.184522	1	1.45656	3.04e-06	8.5e-05	3.88308	5.49e-70	8.91e-68	-0.36039	0.252378	1	-0.261247	0.346614	1	1.079	1.115	1.338	1.7	3.428	22.898
70737	Cgn	NM_001037711	chr3	94563992	94590437	-	5015	1	Cgn|6330408J11Rik|-|3 F2.1|3 40.74 cM|protein-coding	1.76514	0.411363	1	5.0244	8.47e-08	3.18e-06	7.92225	8.88e-49	7.79e-47	-2.36235	1	1	-2.34094	1	1	0	0	0.002	0.01	0.094	0.827
68044	Chac2	NM_026527	chr11	30876707	30886365	-	1325	1	Chac2|-|-|11|11 A4|protein-coding	0.529368	0.0238025	0.483836	1.68531	7.12e-09	3.26e-07	1.3995	4.24e-10	4.86e-09	-0.0203476	0.925623	1	0.043254	0.852872	1	5.381	5.488	5.181	7.632	15.788	16.111
110749	Chaf1b	NM_028083	chr16	93884146	93906351	+	1897	1	Chaf1b|2600017H24Rik|C76145|CAF-I p60|CAF-Ip60|CAF1|CAF1A|CAF1P60|MPHOSPH7|-|16 C4|16 54.96 cM|protein-coding	0.0436018	0.782837	1	-0.273236	0.257324	0.892109	-1.11029	1.33e-12	2e-11	0.0445067	0.77269	1	0.0495555	0.755041	1	27.942	27.714	25.993	27.815	21.262	14.011
66121	Chchd1	NM_025366	chr14	21522249	21523647	+	590	1	Chchd1|1110001O19Rik|2400010G13Rik|MRP-S37|-|14|14 B|protein-coding	-0.371845	0.149857	1	0.390347	0.381967	1	-1.1442	1.6e-05	9.93e-05	-0.501432	0.0442373	1	-0.374092	0.137862	1	75.702	80.876	100.209	80.933	112.075	54.249
103172	Chchd10	NM_175329	chr10	75398318	75400479	+	942	1	Chchd10|1620401E04Rik|AI267078|Ndg2|-|10|10 C1|protein-coding	-0.0671601	0.682654	1	-0.561836	0.0475829	0.30135	-1.75248	7.08e-20	1.79e-18	-0.149172	0.352941	1	-0.00188679	0.994752	1	29.678	31.996	31.419	31.141	19.555	10.883
66075	Chchd3	NM_025336	chr6	32742227	33010152	-	1422	1	Chchd3|0610041L09Rik|1700039J09Rik|AW558177|-|6|6 B1|protein-coding	-0.0402674	0.803404	1	-0.829792	0.00123126	0.017183	-1.8473	5e-29	2.01e-27	-0.0628613	0.694837	1	0.00970348	0.955574	1	132.364	139.822	132.155	134.412	73.064	42.811
72170	Chchd4	NM_133928	chr6	91414270	91423417	-	1240	1	Chchd4|2410012P20Rik|2810014D17Rik|AI838740|-|6|6 D1|protein-coding	-0.450334	0.0222817	0.465659	-0.72897	0.0220455	0.172511	-1.51064	2.42e-13	3.85e-12	-0.386926	0.0460194	1	-0.274387	0.166809	1	37.775	39.816	46.666	35.91	25.784	19.37
68058	Chd1l	NM_026539	chr3	97364671	97414113	-	2964	1	Chd1l|4432404A22Rik|Alc1|Snf2p|-|3|3 F2|protein-coding	-0.00170632	0.992389	1	-0.311606	0.210093	0.801669	-1.36841	1.76e-17	3.81e-16	-0.0408701	0.79619	1	0.00762036	0.964562	1	18.32	18.785	18.143	18.895	14.554	8.132
216848	Chd3	NM_146019	chr11	69156775	69182928	-	7239	1	Chd3|2600010P09Rik|AF020312|Chd7|Prp7|Prp9-1|-|11|11 B3|protein-coding	0.0186282	0.921161	1	-0.113309	0.697495	1	1.32386	2.28e-12	3.35e-11	0.255828	0.16123	1	0.243418	0.185768	1	50.276	48.553	40.973	43.003	38.804	117.626
71389	Chd6	NM_173368	chr2	160772714	160934822	-	10540	1	Chd6|5430439G14Rik|6330406J24Rik|CHD-6|-|2|2 H2|protein-coding	0.0264228	0.894381	1	0.277821	0.341081	1	1.0913	4.15e-08	3.77e-07	0.101835	0.605265	1	0.00487124	0.979424	1	5.229	4.716	4.76	4.964	5.873	11.598
218865	Chdh	NM_001136240	chr14	30822186	30853652	+	5642	1	Chdh|AU041472|D630034H06Rik|-|14|14 B|protein-coding	-0.597544	0.000706791	0.0335231	-2.22397	9.31e-16	1.04e-13	-2.84639	6.66e-32	3.07e-30	-0.000674574	0.997397	1	-0.104689	0.541423	1	38.966	35.941	37.604	25.831	8.092	5.969
12649	Chek1	NM_007691	chr9	36516067	36534243	-	3382	1	Chek1|C85740|Chk1|rad27|-|9|9 A5.3|protein-coding	-0.0366542	0.822091	1	-0.420056	0.0782197	0.426422	-1.3066	3.87e-16	7.58e-15	0.107981	0.482378	1	-0.0279386	0.857664	1	13.426	12.027	11.942	11.956	8.745	5.618
229688	Chil6	NM_178412	chr3	106190302	106209100	-	1655	1	Chil6|BYm|Chil8|-|3|3 F2.3|protein-coding	-0.0176615	1	1	-5.4323	0.00543706	0.0582611	-3.1373	0.012123	0.0422926	-1.464	0.145084	1	-1.4102	0.147628	1	0.028	0.029	0.078	0.079	0	0.008
71884	Chit1	NM_027979	chr1	136007819	136048117	+	1801	1	Chit1|2300002L19Rik|-|1|1 E4|protein-coding	0.262435	0.51245	1	-2.049	0.000142831	0.00275655	-2.32387	4.39e-05	0.000251487	-0.0221492	1	1	0.12674	0.791302	1	0.425	0.47	0.418	0.52	0.099	0.094
67064	Chmp1b	NM_024190	chr18	67365013	67367541	+	2526	1	Chmp1b|2810405I11Rik|Chmp1b1|-|18|18 E1|protein-coding	0.253082	0.113605	1	1.02055	2.65e-05	0.000607024	1.3771	2.21e-17	4.72e-16	0.0303346	0.844807	1	-0.0381632	0.809067	1	11.971	11.234	11.27	13.742	22.433	33.982
108699	Chn1	NM_175752	chr2	73448717	73498480	-	3853	1	Chn1|0610007I19Rik|0710001E19Rik|1700112L09Rik|2900046J01Rik|AI413815|ARHGAP2|-|2|2 C3|protein-coding	1.11504	0.0224409	0.468028	2.06844	8.22e-06	0.00020931	5.52883	4.07e-67	6.08e-65	-0.0627512	1	1	-0.917417	0.178164	1	0.058	0.031	0.058	0.132	0.245	3.153
329427	Chn1os3	NR_040623	chr2	73434583	73454069	+	2703	1	Chn1os3|Gm13704|OTTMUSG00000013429|-|2|2 C3|ncRNA	1.87943	0.206186	1	1.82643	0.304706	0.978127	5.66701	8.28e-23	2.48e-21	0.476659	1	1	-0.867815	1	1	0.013	0.004	0.009	0.036	0.038	0.577
56398	Chp1	NM_019769	chr2	119373443	119412758	+	2585	1	Chp1|1500003O03Rik|AA960066|AI046351|Cahp|Chp|Sid470p|p24|vac|-|2|2 E5|protein-coding	0.261676	0.102112	1	0.95745	0.000667184	0.0102907	1.30188	1.72e-15	3.22e-14	0.0734413	0.633737	1	0.0309712	0.849935	1	28.653	27.726	26.205	32.695	52.965	74.948
12672	Chrm4	NM_007699	chr2	91762346	91769986	+	2764	1	Chrm4|Chrm-4|M4|-|2 E1|2 50.63 cM|protein-coding	0.198246	0.345102	1	-0.608326	0.0346969	0.240865	1.35155	1.61e-09	1.73e-08	-0.0856825	0.69081	1	-0.0125474	0.949894	1	1.388	1.46	1.42	1.695	0.913	4.182
11438	Chrna4	NM_015730	chr2	180757016	180773882	-	4429	1	Chrna4|Acra-4|Acra4|EBN1|ENFL1|-|2 H4|2 103.54 cM|protein-coding	5.13e-15	1	1	2.30957	1	1	5.06692	0.0138559	0.0475922	0	1	1	0	1	1	0	0	0	0	0.003	0.025
11443	Chrnb1	NM_009601	chr11	69597538	69609439	-	2136	1	Chrnb1|Achr-2|Acrb|-|11 B3|11 42.87 cM|protein-coding	0.313565	0.574887	1	0.136226	0.769234	1	1.76927	2.18e-07	1.8e-06	0.818796	0.0313654	1	0.529351	0.232337	1	0.314	0.254	0.171	0.223	0.179	0.678
58250	Chst11	NM_021439	chr10	82448242	82658636	+	5514	1	Chst11|1110020P09Rik|C4ST|C4ST-1|C4ST1|C4s|-|10|10 C1|protein-coding	0.127724	0.551877	1	-0.944591	0.00408315	0.0462059	-1.23053	9.14e-05	0.000492967	-0.260225	0.244064	1	-0.328634	0.173049	1	0.478	0.46	0.552	0.623	0.291	0.27
59031	Chst12	NM_021528	chr5	140981563	141001192	+	1782	1	Chst12|AI595374|C4S-2|C4ST2|-|5|5 G2|protein-coding	-0.630138	0.000608473	0.0297352	-1.30127	1.01e-06	3.13e-05	-1.71014	4.14e-11	5.31e-10	-0.02169	0.907315	1	-0.0118865	0.953801	1	5.883	5.769	5.712	3.885	2.268	2.028
72136	Chst14	NM_028117	chr2	118752233	118754319	+	2084	1	Chst14|2600016L03Rik|D4ST-1|D4st1|-|2|2 E5|protein-coding	0.925455	0.153057	1	0.595332	0.387608	1	3.21936	8.36e-16	1.6e-14	0.377185	0.527083	1	-0.316806	0.717141	1	0.107	0.064	0.079	0.158	0.116	0.87
26887	Chst4	NM_011998	chr8	112552975	112563234	-	1996	1	Chst4|GST-3|Gn6st-2|HEC-GlcNAc6ST|-|8|8 E1|protein-coding	4.89715	0.0241601	0.488914	7.92975	2.02e-10	1.15e-08	9.84735	8.25e-42	5.72e-40	0	1	1	0	1	1	0	0	0	0.049	0.339	1.599
12265	Ciita	NM_001243760	chr16	10480165	10527733	+	5414	1	Ciita|C2ta|EG669998|Gm9475|Mhc2ta|-|16|16 A1|protein-coding	2.59758	0.00948205	0.252652	2.73056	0.0132926	0.117864	4.68618	3.33e-11	4.36e-10	-0.899539	1	1	3.29021	0.000234576	0.0357016	0.002	0.052	0.005	0.029	0.032	0.153
214425	Cilp	NM_173385	chr9	65112987	65128412	+	4141	1	Cilp|9830114D16|C130036G17Rik|-|9|9 C|protein-coding	1.1852	1	1	1.87317	0.43664	1	3.82376	0.000794034	0.00357189	0.815574	1	1	-2.30105	1	1	0.006	0	0.003	0.008	0.012	0.058
67236	Cinp	NM_027223	chr12	112110820	112127355	-	2171	1	Cinp|1810047K05Rik|2810452K22Rik|-|12|12 F2|protein-coding	-0.360688	0.0452548	0.719262	-0.443026	0.126514	0.582701	-1.10628	2.13e-09	2.25e-08	-0.187548	0.284139	1	-0.174132	0.328419	1	24.667	24.584	26.659	21.542	18.12	14.473
12696	Cirbp	NM_007705	chr10	79630586	79634398	+	1247	1	Cirbp|Cirp|R74941|-|10 C1|10 39.72 cM|protein-coding	0.224069	0.164508	1	0.844877	0.000804143	0.0120107	1.01322	9.9e-10	1.09e-08	-0.0300951	0.847619	1	-0.0272903	0.869662	1	27.052	26.34	26.402	31.871	45.543	62.182
21771	Cirh1a	NM_011574	chr8	109417540	109446994	+	2230	1	Cirh1a|Cirhin|Naic|Teg-292|Tex292|-|8|8 D3|protein-coding	-0.254037	0.119299	1	-1.12727	1.02e-05	0.000256985	-1.16098	9.48e-13	1.44e-11	0.0402384	0.79709	1	-0.0192012	0.905411	1	53.902	51.175	50.479	44.146	22.975	26.133
67006	Cisd2	NM_025902	chr3	135069376	135086397	-	2864	1	Cisd2|1500009M05Rik|1500026J14Rik|1500031D15Rik|AI848398|B630006A20Rik|Miner1|Noxp70|Zcd2|-|3|3 G3|protein-coding	-0.201504	0.281126	1	-0.085238	0.770425	1	-1.00084	6.52e-08	5.8e-07	-0.195625	0.270979	1	-0.151483	0.405965	1	15.02	15.096	16.301	14.68	14.297	9.594
17684	Cited2	NM_010828	chr10	17443034	17445480	+	1965	1	Cited2|AI835299|ER154-like|Mrg1|Msg2|p35srj|-|10|10 A2|protein-coding	1.24942	9.95e-13	3.47e-10	0.837187	0.00141421	0.0193334	1.32897	5.41e-10	6.14e-09	0.457064	0.0353664	1	0.315015	0.126353	1	3.73	3.24	2.62	6.485	4.509	7.622
12709	Ckb	NM_021273	chr12	112907566	112910549	-	1468	1	Ckb|B-CK|Bck|Ck-3|Ck3|Ckbb|-|12 F1|12 61.09 cM|protein-coding	-2.99567	0.528945	1	0.654998	1	1	3.78767	2.64e-06	1.86e-05	-0.899541	1	1	0.530676	1	1	0.008	0.025	0.016	0	0.026	0.287
54124	Cks1b	NM_016904	chr3	89219394	89222213	-	752	1	Cks1b|2410005G18Rik|2610005D03Rik|AA407784|Cks1|sid1334|-|3|3 F1|protein-coding	-0.275927	0.188987	1	0.145666	0.666938	1	-1.04106	1.26e-06	9.29e-06	-0.333336	0.109729	1	-0.27079	0.198898	1	191.074	196.72	226.672	197.186	228.583	130.603
624855	Cks1brt	NM_001037922	chr8	87675823	87697521	+	2393	1	Cks1brt|EG624855|Gm6531|-|8 C3|8|protein-coding	-0.332014	0.0952522	1	0.112916	0.712532	1	-1.0516	4.91e-07	3.85e-06	-0.367469	0.0659376	1	-0.204965	0.306656	1	5.767	6.34	7.044	5.916	7.011	4.002
66197	Cks2	NM_025415	chr13	51740601	51746031	+	689	1	Cks2|1110038L14Rik|CKSHS2|-|13|13 A5|protein-coding	-0.222122	0.217415	1	0.0677333	0.821238	1	-1.06602	4.62e-09	4.7e-08	-0.193562	0.268304	1	-0.196857	0.272464	1	113.255	110.229	122.915	109.684	118.692	69.068
80797	Clca3a2	NM_030601	chr3	144459523	144482458	-	3638	1	Clca3a2|Clca2|-|3|3 H2|protein-coding	3.45604	0.539458	1	5.06432	0.0598111	0.355202	6.42526	1.8e-05	0.000110377	0	1	1	0	1	1	0	0	0	0.009	0.032	0.081
229927	Clca3b	NM_139148	chr3	144485587	144512266	-	3290	1	Clca3b|Clca4|-|3|3 H2-H3|protein-coding	3.38514	0.522553	1	6.97744	4.09e-07	1.35e-05	8.96369	2.09e-25	7.14e-24	0	1	1	0	1	1	0	0	0	0.01	0.12	0.526
56708	Clcf1	NM_019952	chr19	4214238	4223505	+	1857	1	Clcf1|BSF-3|Bsf3|CLC|NNT-1|-|19|19 A|protein-coding	-0.41883	0.84043	1	0.522333	0.53171	1	3.61949	1.05e-21	2.95e-20	-0.166568	1	1	0.411702	0.520716	1	0.076	0.111	0.082	0.062	0.117	1.197
12738	Cldn2	NM_016675	chrX	136335347	136345927	+	3062	1	Cldn2|AL022813|-|X|X F1|protein-coding	0.970602	0.0660361	0.90261	2.49099	2.4e-06	6.83e-05	7.0036	2.9e-132	1.14e-129	-0.813041	0.290727	1	-0.547355	0.31832	1	0.038	0.047	0.065	0.134	0.391	9.906
74987	Cldn34d	NM_001201395	chrX	73827949	73848263	-	999	1	Cldn34d|4930468A15Rik|-|X|X A7.3|protein-coding	5.13e-15	1	1	5.13e-15	1	1	5.22745	0.00797094	0.0289604	0	1	1	0	1	1	0	0	0	0	0	0.127
93694	Clec2d	NM_053109	chr6	129130633	129136553	+	1207	1	Clec2d|Clr-b|Clrb|Ocil|-|6|6 F3|protein-coding	0.054718	1	1	0.735588	0.239938	0.857832	1.59591	0.0033317	0.0131701	0.489546	0.425151	1	-0.389193	0.622155	1	0.244	0.13	0.166	0.177	0.264	0.594
26888	Clec4a2	NM_001170333	chr6	123073334	123094017	+	2544	1	Clec4a2|Clec4a|Clecsf6|DCIR|Dcir1|-|6 58.18 cM|6 F3|protein-coding	-2.18574	1	1	1.35941	0.687807	1	8.01235	1.94e-50	1.79e-48	-2.36265	1	1	0.934401	1	1	0	0.01	0	0	0.016	1.787
474145	Clec4a4	NM_001005860	chr6	122940385	122974439	+	1084	1	Clec4a4|Dcir2|-|6|6 F2|protein-coding	5.13e-15	1	1	3.11994	0.565408	1	7.83871	4.73e-13	7.33e-12	0	1	1	0	1	1	0	0	0	0	0.024	0.726
69810	Clec4b1	NM_027218	chr6	122999980	123021573	+	678	1	Clec4b1|1810046I24Rik|Aplra2|Clec4b|DCAR|DCARbeta|Dcar2|-|6|6 F2|protein-coding	5.13e-15	1	1	5.13e-15	1	1	7.20219	1.48e-09	1.6e-08	0	1	1	2.39978	1	1	0	0.018	0	0	0	0.747
114584	Clic1	NM_033444	chr17	35187188	35195664	+	1151	1	Clic1|Clcp|G6|-|17 B1|17 18.58 cM|protein-coding	-0.169713	0.308503	1	0.51107	0.0461368	0.295224	1.18946	2.87e-12	4.19e-11	-0.10343	0.526157	1	-0.211584	0.205259	1	52.411	47.68	53.634	49.886	76.444	143.241
69454	Clic3	NM_027085	chr2	25312363	25314292	+	791	1	Clic3|2300003G24Rik|-|2|2 A3|protein-coding	0.45545	0.334986	1	0.00440821	1	1	1.02393	0.00938832	0.0335504	0.175396	0.770844	1	0.865966	0.0326844	1	0.535	0.855	0.461	0.644	0.451	1.084
29876	Clic4	NM_013885	chr4	134769885	134828675	-	4056	1	Clic4|D0Jmb3|TU-74|mc3s5|mtCLIC|-|4|4 D3|protein-coding	-0.133028	0.423484	1	-0.49986	0.0610321	0.359451	-1.16267	7.71e-12	1.07e-10	0.0320417	0.842932	1	0.00266185	0.987619	1	35.672	34.477	33.694	31.759	24.148	17.363
78785	Clip4	NM_030179	chr17	72131287	72207691	+	4037	1	Clip4|1700024K14Rik|1700074B05Rik|4833417L20Rik|5830409B12Rik|Rsnl2|-|17|17 E2|protein-coding	0.0427432	0.899596	1	-0.642778	0.290178	0.957977	1.67377	2.97e-06	2.07e-05	-0.990328	0.0982124	1	-1.38521	0.0135785	0.650441	0.027	0.044	0.117	0.112	0.046	0.28
71566	Clmp	NM_133733	chr9	40494047	40592129	+	2920	1	Clmp|9030425E11Rik|ACAM|ASP5|AW557819|-|9|9 A5.1|protein-coding	5.13e-15	1	1	5.13e-15	1	1	6.21172	3.38e-05	0.000197244	0	1	1	0	1	1	0	0	0	0	0	0.087
12752	Cln3	NM_001146311	chr7	133714914	133727794	-	2468	1	Cln3|AI323623|-|7 F3|7 69.16 cM|protein-coding	0.179459	0.310569	1	0.883528	0.000717012	0.0109196	1.97354	2.25e-29	9.2e-28	-0.0334016	0.876147	1	-0.246449	0.180018	1	2.956	2.535	2.915	3.391	5.429	13.288
27278	Clnk	NM_013748	chr5	39097699	39267932	-	1562	1	Clnk|MIST|-|5|5 B3|protein-coding	-2.1856	1	1	2.01867	0.472868	1	6.83782	8.61e-28	3.27e-26	-2.36119	1	1	-2.34029	1	1	0	0	0.008	0	0.041	1.251
65945	Clstn1	NM_001290989	chr4	148960577	149023008	+	4439	1	Clstn1|1810034E21Rik|Cst-1|Cstn1|-|4|4 E1|protein-coding	0.404473	0.787475	1	2.41982	0.0197537	0.159826	2.26034	0.000729274	0.00330386	-2.38071	0.151104	1	-1.43855	0.54917	1	0.003	0.005	0.016	0.022	0.072	0.092
74148	Cluh	NM_001081158	chr11	74462997	74484349	+	5371	1	Cluh|1300001I01Rik|Kiaa0664|mKIAA0664|-|11|11 B4|protein-coding	0.0134344	0.938909	1	-1.12715	2.23e-05	0.000523654	-1.0541	7.85e-10	8.75e-09	0.10093	0.539755	1	0.134266	0.422696	1	38.26	38.564	34.523	36.315	15.77	19.16
74438	Clvs1	NM_028940	chr4	9196464	9378838	+	3596	1	Clvs1|4933402J24Rik|Clvl1|Rlbp1l1|-|4|4 A1|protein-coding	-0.542024	1	1	4.29755	1.56e-11	1.04e-09	5.22058	5.52e-27	2.01e-25	-0.44244	1	1	-0.386121	1	1	0.01	0.01	0.013	0.009	0.28	0.602
215890	Clvs2	NM_175448	chr10	33232140	33344406	-	2492	1	Clvs2|A330019N05Rik|Rlbp1l2|-|10|10 A4|protein-coding	1.14502	0.241302	1	3.45244	1.2e-08	5.25e-07	4.00635	7.32e-17	1.51e-15	-4.65296	0.0465276	1	-4.62048	0.0489459	1	0	0	0.028	0.066	0.322	0.547
69634	Clybl	NM_029556	chr14	122580916	122801456	+	1231	1	Clybl|0610033J05Rik|2310014M14Rik|AI256068|Clb|-|14|14 E5|protein-coding	-0.0598045	0.74563	1	-0.325105	0.21176	0.804856	-1.54138	4.82e-14	8.11e-13	-0.0976694	0.577283	1	-0.132965	0.473603	1	9.654	9.44	9.854	9.764	7.643	3.953
12763	Cmah	NM_007717	chr13	24506991	24569158	+	9384	1	Cmah|-|-|13|13 A3.2|protein-coding	-0.611813	0.000472802	0.0239862	-1.54177	2.92e-08	1.17e-06	-2.04299	2.05e-24	6.68e-23	0.0182906	0.913935	1	-0.0899756	0.604378	1	2.229	2.057	2.128	1.425	0.746	0.595
69574	Cmbl	NM_181588	chr15	31498667	31519874	+	1033	1	Cmbl|2310016A09Rik|-|15|15 B2|protein-coding	1.41468	0.128558	1	3.28561	2.18e-06	6.29e-05	4.43441	1.06e-16	2.16e-15	0.721378	0.575411	1	0.319484	1	1	0.08	0.058	0.046	0.127	0.469	1.212
66116	Cml1	NM_023160	chr6	85860148	85865671	-	1007	1	Cml1|1110002I11Rik|AI266962|-|6|6 C3|protein-coding	0.448469	0.279485	1	1.84631	9.56e-06	0.000241281	1.17946	0.000406506	0.00193301	-0.0940633	0.851189	1	-0.209035	0.698217	1	0.479	0.432	0.49	0.686	1.646	1.299
66497	Cmss1	NM_025599	chr16	57302113	57606980	-	1159	1	Cmss1|1110001A06Rik|2610528E23Rik|4930572F24Rik|AV099812|AV122629|-|16|16 C1.1|protein-coding	-0.0172589	0.924548	1	-0.343262	0.220031	0.823515	-1.01121	1.51e-07	1.28e-06	-0.129988	0.472044	1	-0.0171231	0.924452	1	18.588	20.064	19.31	20.075	14.332	11.26
67213	Cmtm6	NM_026036	chr9	114640321	114658461	+	3346	1	Cmtm6|2810051A14Rik|AA536733|Cklfsf6|-|9|9 F3|protein-coding	0.312492	0.0488104	0.758232	0.746089	0.00381667	0.04373	1.15233	3.23e-13	5.09e-12	0.00678259	0.966776	1	-0.143219	0.370156	1	9.002	8.087	8.621	10.974	14.866	22.212
102545	Cmtm7	NM_133978	chr9	114665954	114691111	-	1130	1	Cmtm7|AI481279|Cklfsf7|LNV|-|9|9 F3|protein-coding	-0.184961	0.313658	1	-1.14955	7.16e-05	0.00149266	-1.92872	1.85e-23	5.74e-22	-0.163089	0.365107	1	-0.217607	0.236852	1	122.169	116.312	129.701	120.122	55.257	40.047
12785	Cnbp	NM_013493	chr6	87792609	87801100	-	2171	1	Cnbp|AA408710|Cnbp1|Znf9|-|6|6 D1-D2|protein-coding	-0.188631	0.301337	1	-0.491203	0.0943699	0.48656	-1.23385	3.89e-11	5e-10	-0.174964	0.32963	1	-0.140341	0.442991	1	307.522	311.574	329.168	302.012	219.888	164.794
12788	Cnga1	NM_007723	chr5	72994936	73033991	-	2727	1	Cnga1|Cncg|-|5 C3.2|5 38.44 cM|protein-coding	0.487007	0.323897	1	0.0584264	1	1	1.53907	5.64e-05	0.000316498	0.193255	0.815206	1	0.289147	0.643737	1	0.134	0.142	0.112	0.163	0.117	0.382
12790	Cnga3	NM_009918	chr1	37276050	37320229	+	3546	1	Cnga3|CNG3|-|1|1 B|protein-coding	0.228557	1	1	0.837378	0.516068	1	1.93445	0.0060105	0.0225132	-1.52827	0.317824	1	0.224428	1	1	0.007	0.024	0.02	0.023	0.036	0.091
333329	Cngb1	NM_001195413	chr8	97762943	97830485	-	6156	1	Cngb1|Cngb1b|Gm1959|-|8|8 D1|protein-coding	5.13e-15	1	1	7.83479	1.67e-08	7.03e-07	10.7887	1.04e-37	6.17e-36	0	1	1	0	1	1	0	0	0	0	0.126	1.001
12794	Cnih2	NM_009920	chr19	5092868	5098521	-	1335	1	Cnih2|CNIH-2|Cnil|-|19|19 A|protein-coding	0.145303	0.785797	1	0.542311	0.26454	0.907311	1.86465	5.93e-08	5.29e-07	0.0305427	1	1	-0.141585	0.932886	1	0.335	0.271	0.317	0.345	0.43	1.338
83674	Cnnm1	NM_031396	chr19	43514926	43571703	+	5027	1	Cnnm1|AI846314|Acdp1|CLP-1|-|19 C3|19 36.67 cM|protein-coding	0.116443	0.535096	1	-1.64159	3.42e-08	1.36e-06	-1.87898	1.1e-13	1.8e-12	0.0791118	0.693425	1	0.0705006	0.72369	1	2.137	2.031	1.962	2.211	0.591	0.613
94220	Cnnm4	NM_033570	chr1	36528442	36565621	+	4573	1	Cnnm4|5430430O18Rik|Acdp4|-|1 B|1 15.28 cM|protein-coding	0.71553	2.63e-05	0.0020437	1.25725	2.74e-05	0.000627312	1.62977	1.21e-21	3.36e-20	-0.00148583	1	1	-0.0215036	0.911753	1	3.015	2.922	2.92	4.919	7.385	10.449
12802	Cnr2	NM_009924	chr4	135451104	135476134	+	4080	1	Cnr2|CB-2|CB2|CB2-R|-|4|4 D3|protein-coding	0.330205	0.0642406	0.887969	1.13244	1.05e-05	0.000262094	1.45951	5.92e-16	1.14e-14	0.289758	0.102253	1	0.170909	0.357462	1	1.935	1.762	1.524	1.975	3.324	4.853
66797	Cntnap2	NM_025771	chr6	47194395	47251370	+	3426	1	Cntnap2|5430425M22Rik|Caspr2|mKIAA0868|-|6|6 B2|protein-coding	-0.455536	0.0149332	0.356957	-2.42989	7.91e-16	8.93e-14	-3.59656	2.14e-48	1.87e-46	-0.883885	7.13e-06	0.0025983	-0.819543	2.49e-05	0.00585859	2.225	2.292	3.901	2.971	0.74	0.378
12808	Cobl	NM_172496	chr11	12136679	12364963	-	5601	1	Cobl|-|-|11 A1|11 7.3 cM|protein-coding	-2.18551	1	1	1.84975	0.436556	1	4.58315	7.4e-07	5.67e-06	-0.0552916	1	1	-2.34039	1	1	0.002	0	0.002	0	0.009	0.075
12815	Col11a2	NM_009926	chr17	34176382	34203187	+	5539	1	Col11a2|-|-|17 B1|17 17.98 cM|protein-coding	0.478868	0.0188164	0.418961	0.285045	0.294431	0.964602	1.66052	2.03e-17	4.35e-16	0.185532	0.417682	1	0.301429	0.206123	1	3.199	3.254	2.75	3.889	3.291	9.957
12816	Col12a1	NM_001290308	chr9	79446794	79566529	-	11651	1	Col12a1|-|-|9 E1|9 43.82 cM|protein-coding	1.751	0.645316	1	0.891746	1	1	3.45141	0.00536651	0.020297	0.807497	1	1	2.78324	0.0587185	1	0.002	0.008	0.001	0.004	0.002	0.016
12819	Col15a1	NM_009928	chr4	47220884	47326037	+	5277	1	Col15a1|-|-|4|4 B1-B3|protein-coding	0.631313	0.000361933	0.019298	-0.929006	0.00071967	0.0109458	-1.14199	1.29e-06	9.53e-06	0.103306	0.55099	1	-0.201046	0.273945	1	1.864	1.477	1.673	2.708	0.887	0.874
12821	Col17a1	NM_001290825	chr19	47720831	47766532	-	5483	1	Col17a1|BP180|Bpag|Bpag2|-|19 D1|19 40.07 cM|protein-coding	4.47745	9.3e-07	0.00010961	6.89369	7.5e-22	1.5e-19	9.11125	2.92e-76	5.28e-74	1.72108	0.404757	1	2.08476	0.251408	1	0.009	0.011	0.002	0.064	0.33	1.74
73368	Col20a1	NM_028518	chr2	180721240	180752245	+	4151	1	Col20a1|1700051I12Rik|-|2|2 H4|protein-coding	0.667855	0.0148142	0.355237	0.600487	0.0754782	0.416385	1.84133	1.28e-15	2.42e-14	0.274773	0.367451	1	0.409021	0.22235	1	0.57	0.576	0.459	0.733	0.697	1.897
12824	Col2a1	NM_001113515	chr15	97806033	97835155	-	4874	1	Col2a1|Col2|Col2a|Col2a-1|Del1|Dmm|Lpk|M100856|Rgsc856|-|15 F1|15 53.97 cM|protein-coding	-0.995432	0.648486	1	2.5206	0.0092059	0.0892422	3.5904	1.04e-06	7.81e-06	-3.73577	0.275912	1	-0.522729	1	1	0	0.005	0.007	0.003	0.044	0.11
12830	Col4a5	NM_001163155	chrX	137909962	138123778	+	6438	1	Col4a5|-|-|X F2|X 62.16 cM|protein-coding	1.18508	1	1	3.92251	0.00374787	0.0431426	3.54854	0.00344376	0.0135824	1.33427	0.647432	1	-0.01786	1	1	0.006	0.002	0.002	0.005	0.031	0.031
53867	Col5a3	NM_016919	chr9	20574494	20619478	-	6017	1	Col5a3|-|-|9|9 A3|protein-coding	0.211899	0.855584	1	-1.5879	0.151148	0.661329	-2.62187	0.00839692	0.030364	-2.185	0.0196153	0.98999	-1.44436	0.0865787	1	0.006	0.01	0.027	0.033	0.008	0.005
12833	Col6a1	NM_009933	chr10	76171537	76188789	-	3939	1	Col6a1|AI747156|Col6a-1|-|10 B5-C1|10 39.71 cM|protein-coding	-0.147583	0.396852	1	-1.55007	3.58e-08	1.42e-06	-2.08578	4.19e-27	1.54e-25	0.0542512	0.740217	1	0.391092	0.0206399	0.842663	9.012	11.332	8.406	7.915	2.965	2.278
12835	Col6a3	NM_001243008	chr1	92663435	92740548	-	10793	1	Col6a3|AI507288|Col6a-3|-|1 D|1 45.53 cM|protein-coding	-1.53701	0.247366	1	2.23949	0.00209575	0.026764	2.08238	0.000629576	0.00289141	-1.42713	0.291458	1	-2.7814	0.079752	1	0.004	0.001	0.009	0.004	0.047	0.05
68553	Col6a4	NM_026763	chr9	105892649	105999022	-	7399	1	Col6a4|1110001D15Rik|AI413310|AU023415|Dvwa|EG235580|Vwa6|-|9|9 F1|protein-coding	3.32939	0.534997	1	7.22002	6.52e-08	2.51e-06	10.2412	2.09e-39	1.33e-37	0	1	1	2.27748	1	1	0	0.002	0	0.004	0.064	0.568
665033	Col6a5	NM_001167923	chr9	105758400	105862974	-	9253	1	Col6a5|Col29a1|EG665033|Gm7455|-|9 F1|9|protein-coding	5.13e-15	1	1	4.55261	0.0632318	0.368538	5.51198	0.00213679	0.00877899	0	1	1	0	1	1	0	0	0	0	0.007	0.017
245026	Col6a6	NM_001102607	chr9	105591747	105730415	-	7059	1	Col6a6|E330019B14|E330026B02Rik|-|9|9 F1|protein-coding	5.13e-15	1	1	5.09951	0.0292606	0.213075	5.06502	0.0130974	0.0453234	0	1	1	0	1	1	0	0	0	0	0.023	0.011
382864	Colq	NM_009937	chr14	32336270	32390569	-	2816	1	Colq|A130034K24Rik|-|14|14 B|protein-coding	-0.854439	1.53e-06	0.000168446	-3.01633	1.03e-28	3.35e-26	-2.9323	1.41e-27	5.28e-26	-0.0399652	0.809777	1	-0.118551	0.481039	1	19.492	18.125	19.397	11.229	2.291	2.911
69156	Comtd1	NM_026965	chr14	22665083	22668132	-	2232	1	Comtd1|1810030M08Rik|MT773|-|14|14 B|protein-coding	-0.0366593	0.831293	1	-0.456604	0.0804955	0.435473	-1.3045	2.17e-12	3.2e-11	-0.0898537	0.590718	1	-0.0250753	0.882832	1	12.615	13	12.77	12.973	8.864	6.055
12850	Coq7	NM_009940	chr7	125668576	125676870	-	906	1	Coq7|clk-1|-|7 F2|7 63.44 cM|protein-coding	-0.0302951	0.857413	1	-0.0648519	0.803003	1	-1.02944	9.65e-09	9.49e-08	-0.0734099	0.659929	1	-0.0942784	0.589793	1	34.831	34.44	34.847	35.844	31.926	20.039
53419	Corin	NM_016869	chr5	72691264	72895447	-	4839	1	Corin|AV273130|Lrp4|-|5|5 C3.2|protein-coding	0.424301	1	1	0.563602	1	1	5.93947	2.18e-26	7.71e-25	1.16828	0.480648	1	1.40655	0.386863	1	0.013	0.013	0.005	0.007	0.008	0.399
12721	Coro1a	NM_009898	chr7	133843288	133848330	-	1646	1	Coro1a|Clabp|Lmb3|TACO|p57|-|7 69.25 cM|7 F3|protein-coding	0.112956	0.534605	1	1.15693	2.34e-05	0.000546056	1.12794	8.54e-10	9.46e-09	-1.47903	4.18e-16	8.37e-13	-1.40241	2.94e-14	6.43e-11	28.243	29.129	74.645	84.453	165.035	191.939
72042	Cotl1	NM_028071	chr8	122333114	122364479	-	1633	1	Cotl1|1810074P22Rik|2010004C08Rik|Clp|-|8|8 E1|protein-coding	0.143897	0.559035	1	2.07612	1.07e-11	7.31e-10	3.23495	2.85e-52	2.8e-50	-1.5078	7.13e-09	5.04e-06	-1.54727	4.27e-08	2.57e-05	1.182	1.161	3.181	3.655	13.974	35.307
12862	Cox6a2	NM_009943	chr7	135348949	135349880	-	654	1	Cox6a2|CoxVIaH|VIaH|-|7 F3|7 70.04 cM|protein-coding	-0.0858863	0.634322	1	0.12298	0.661714	1	-1.22601	1.95e-06	1.4e-05	-0.690626	0.000135505	0.0304532	-0.559384	0.00323269	0.259121	15.85	16.79	24.353	23.86	24.697	12.149
12873	Cpa3	NM_007753	chr3	20115515	20142080	-	1440	1	Cpa3|MC-CPA|-|3 A2|3 6.25 cM|protein-coding	-0.305462	0.0500546	0.768692	-2.6522	2.56e-23	5.55e-21	-3.39871	2.71e-65	3.79e-63	-0.122304	0.424167	1	-0.778598	1.22e-06	0.000446127	18.483	11.577	19.28	16.226	3.09	2.129
12877	Cpeb1	NM_001252526	chr7	88491912	88599644	-	3082	1	Cpeb1|AU024112|Cpeb|mCPEB|-|7|7 D3|protein-coding	-0.406985	0.0550266	0.806844	-1.58297	1.71e-05	0.000410798	-3.10025	2.08e-21	5.72e-20	-0.0527961	0.797938	1	-0.183253	0.365112	1	1.264	1.133	1.255	0.976	0.385	0.169
67579	Cpeb4	NM_026252	chr11	31770940	31835635	+	7629	1	Cpeb4|Cpe-bp4|Cpeb-4|mCPEB-4|-|11|11 A4|protein-coding	0.541557	0.00670497	0.19569	1.43105	1.4e-07	5.08e-06	2.8458	7.25e-50	6.61e-48	0.0876191	0.661038	1	-0.089687	0.714163	1	1.092	0.916	0.994	1.465	2.691	8.23
12889	Cplx1	NM_007756	chr5	108947573	108979046	-	2186	1	Cplx1|921-S|-|5|5 F|protein-coding	0.275131	0.85855	1	-0.323032	0.859656	1	2.16118	2.8e-05	0.000165956	-0.0543346	1	1	-0.189294	1	1	0.07	0.061	0.07	0.09	0.052	0.367
12890	Cplx2	NM_009946	chr13	54472713	54485278	+	4919	1	Cplx2|921-L|AI413745|AW492120|-|13|13 B1|protein-coding	3.38507	0.522299	1	6.08528	0.000357561	0.00605512	7.91057	4.42e-15	7.99e-14	0	1	1	0	1	1	0	0	0	0.007	0.039	0.169
70574	Cpm	NM_027468	chr10	117066556	117124408	+	5184	1	Cpm|1110060I01Rik|5730456K23Rik|AA589379|E030045M14Rik|-|10|10 D2|protein-coding	-1.02346	0.115551	1	-1.78095	0.0169526	0.142041	-2.0522	0.00490093	0.0186849	0.00153081	1	1	-0.25796	0.589011	1	0.052	0.044	0.05	0.025	0.015	0.014
74020	Cpne4	NM_028719	chr9	104472118	104936874	+	3636	1	Cpne4|3632411M23Rik|4933406O10Rik|-|9|9 F1|protein-coding	5.13e-15	1	1	5.13e-15	1	1	6.04332	0.000104285	0.00055678	0	1	1	3.09732	0.54383	1	0	0.007	0	0	0	0.062
240058	Cpne5	NM_153166	chr17	29293466	29374735	-	4343	1	Cpne5|A830083G22Rik|-|17|17 A3.3|protein-coding	-0.233348	0.339584	1	-2.35141	2.07e-10	1.18e-08	-3.33664	3.63e-22	1.05e-20	0.611048	0.00939205	0.674181	0.3449	0.149805	1	1.309	1.051	0.834	0.727	0.159	0.094
54381	Cpq	NM_018755	chr15	33012884	33524307	+	2002	1	Cpq|1190003P12Rik|2610034C17Rik|Hls2|Lal-1|Pgcp|-|15|15 B3.2|protein-coding	0.00101581	0.998227	1	0.694165	0.00428844	0.0480541	1.0891	2.56e-11	3.38e-10	0.0927435	0.578773	1	0.202915	0.259622	1	7.836	8.487	7.054	7.272	11.369	17.452
213573	Cracr2b	NM_001025103	chr7	148646993	148652501	+	1675	1	Cracr2b|6330520A15Rik|BC026645|Cracr2a|Efcab4|Efcab4a|-|7|7 F5|protein-coding	0.581162	0.802476	1	0.735046	0.371918	1	2.5806	3.29e-05	0.00019294	-0.302932	1	1	0.84869	0.429595	1	0.035	0.072	0.042	0.069	0.068	0.302
170788	Crb1	NM_133239	chr1	141094831	141273653	-	4688	1	Crb1|7530426H14Rik|A930008G09Rik|-|1 F|1 60.87 cM|protein-coding	3.1316	0.0320841	0.589852	3.66368	0.0120345	0.109329	3.98289	0.000200844	0.00101857	2.98651	0.0178437	0.963663	2.88974	0.0315712	1	0.025	0.023	0.003	0.028	0.044	0.057
26427	Creb3l1	NM_011957	chr2	91822485	91864327	-	2257	1	Creb3l1|Oasis|-|2|2 E1|protein-coding	1.81243	0.00461771	0.146108	4.43139	1.14e-23	2.53e-21	5.43448	1.01e-55	1.06e-53	0.807457	0.160522	1	-0.428546	0.543592	1	0.115	0.048	0.062	0.219	1.384	3.209
12914	Crebbp	NM_001025432	chr16	4084048	4213404	-	7474	1	Crebbp|AW558298|CBP|CBP/p300|KAT3A|p300/CBP|-|16 A1|16 2.4 cM|protein-coding	0.457815	0.0183262	0.412245	0.491436	0.103061	0.511521	1.07907	3.21e-08	2.96e-07	0.247159	0.207054	1	0.0490307	0.823114	1	5.041	4.117	4.147	5.848	6.058	10.031
77128	Crebrf	NM_029870	chr17	26852595	26913571	+	7442	1	Crebrf|A930001N09Rik|LRF|-|17|17 B1|protein-coding	0.166233	0.438578	1	0.745934	0.008555	0.0841055	1.97496	2.09e-23	6.48e-22	0.410463	0.0464526	1	0.115628	0.592973	1	0.711	0.562	0.518	0.599	0.862	2.351
171508	Creld1	NM_133930	chr6	113433563	113443332	+	2022	1	Creld1|AI843811|-|6 E3|6 52.77 cM|protein-coding	0.373597	0.421096	1	0.0322915	0.928426	1	-1.57175	0.00484634	0.0185061	-0.257586	0.563273	1	-0.421331	0.402738	1	0.157	0.137	0.18	0.244	0.17	0.07
12925	Crip1	NM_007763	chr12	114390223	114392090	+	440	1	Crip1|CRHP|CRP1|Crip|-|12 F1|12 61.59 cM|protein-coding	-0.13893	0.600139	1	0.0837716	0.812694	1	-1.50014	2.15e-07	1.79e-06	-1.34582	1.57e-06	0.00068521	-1.25091	1.47e-05	0.00381262	10.616	11.366	25.325	24.328	25.033	10.643
57914	Crlf2	NM_016715	chr5	109983728	109988012	-	1317	1	Crlf2|CRLM2|Ly114|Tpte2|Tslpr|-|5|5 F|protein-coding	0.20355	0.25858	1	1.6894	2.29e-10	1.28e-08	3.22015	4.83e-74	8.48e-72	-0.0642295	0.726867	1	-0.0549009	0.832758	1	4.672	4.467	4.686	5.581	14.365	50.816
71296	Crnde	NR_033641	chr8	94849930	94880019	-	1238	1	Crnde|4933436C20Rik|-|8|8 C5|ncRNA	0.265786	0.357559	1	0.780844	0.0236987	0.181088	1.69789	4.17e-11	5.33e-10	0.0821868	0.815159	1	0.201627	0.49288	1	1.359	1.434	1.253	1.554	2.101	4.68
72832	Crtac1	NM_145123	chr19	42357527	42506273	-	2599	1	Crtac1|2810454P21Rik|AW047536|Crtac1B|Lotus|-|19|19 C3|protein-coding	2.56096	1	1	8.09829	9.46e-14	8.61e-12	10.6883	5.25e-59	6.16e-57	0	1	1	2.40437	1	1	0	0.005	0	0.006	0.324	2.202
546024	Crxos	NM_001033638	chr7	16481473	16489379	+	937	1	Crxos|AA606869|AY590891|Crxos1|Egam1|-|7|7 A1|protein-coding	-0.64078	0.236088	1	-3.46632	2.25e-06	6.46e-05	-4.90945	1.67e-08	1.6e-07	-4.99663	4.39e-09	3.3e-06	-4.94577	9.09e-09	6.25e-06	0	0.021	0.714	0.343	0.022	0.024
12959	Cryba4	NM_021351	chr5	112675512	112681538	-	801	1	Cryba4|-|-|5|5 F|protein-coding	-0.450128	0.558052	1	-0.246304	0.81824	1	-2.28094	0.000755271	0.00341327	-1.27778	0.0350212	1	-1.07116	0.0860464	1	0.162	0.181	0.382	0.287	0.302	0.088
12960	Crybb1	NM_023695	chr5	112684840	112698605	+	869	1	Crybb1|3110006K12Rik|BB1CRY|-|5 F|5 54.63 cM|protein-coding	0.347442	0.627324	1	-1.3436	0.110383	0.534296	-2.88362	0.00281162	0.0112798	0.896044	0.075631	1	-1.03602	0.195922	1	0.447	0.111	0.23	0.303	0.088	0.032
68631	Cryl1	NM_030004	chr14	57893871	58017320	-	1400	1	Cryl1|1110025H08Rik|A230106J09Rik|C85932|gul3dh|-|14 C3|14 30.1 cM|protein-coding	-0.230756	0.372848	1	-0.475361	0.164303	0.698528	-1.72301	2.03e-08	1.92e-07	-0.150572	0.562321	1	-0.229782	0.409316	1	1.689	1.545	1.78	1.597	1.266	0.633
12972	Cryz	NM_009968	chr3	154259675	154286146	+	2496	1	Cryz|Sez9|-|3|3 H4|protein-coding	-0.277404	0.131612	1	-0.438909	0.102778	0.510639	-1.05317	2.35e-07	1.93e-06	-0.248332	0.181876	1	-0.188497	0.316232	1	2.81	2.885	3.188	2.741	2.38	1.797
12981	Csf2	NM_009969	chr11	54060772	54063401	-	1027	1	Csf2|Csfgm|GMCSF|Gm-CSf|MGI-IGM|-|11 B1.3|11 32.13 cM|protein-coding	-1.53234	0.0388717	0.666534	-1.7224	0.0585107	0.350263	1.93301	9.77e-06	6.29e-05	-0.732115	0.203119	1	0.211531	0.732299	1	0.172	0.318	0.275	0.096	0.074	1.232
12984	Csf2rb2	NM_001287389	chr15	78112938	78136151	-	4398	1	Csf2rb2|AIC2A|BetaIl3|Bil3|Csfgmrb|Il3r|Il3rb|Il3rb2|-|15 E1|15 37.22 cM|protein-coding	0.332134	1	1	2.49379	0.235688	0.851757	4.25593	1.96e-05	0.000119496	0.807505	1	1	-2.30143	1	1	0.005	0	0.003	0.004	0.02	0.074
94109	Csmd1	NM_053171	chr8	15892545	17535385	-	14206	1	Csmd1|B930082H09|mKIAA1890|-|8|8 A2|protein-coding	5.13e-15	1	1	5.13e-15	1	1	5.63555	0.00114816	0.00501359	2.30358	1	1	3.2948	0.539924	1	0.001	0.002	0	0	0	0.012
12991	Csn2	NM_001286021	chr5	88121644	88128450	-	1130	1	Csn2|Csnb|-|5 E1|5 43.56 cM|protein-coding	5.13e-15	1	1	5.97283	0.000378894	0.00635868	10.715	8.57e-58	9.63e-56	0	1	1	0	1	1	0	0	0	0	0.178	5.26
207785	Csrnp2	NM_153407	chr15	100310001	100325670	-	4119	1	Csrnp2|CSRNP-2|Csnrp2|taip-12|-|15|15 F1|protein-coding	0.515351	0.00171685	0.0669126	0.965778	0.000114429	0.00227599	1.4068	4.62e-17	9.64e-16	0.157537	0.337246	1	0.0777248	0.647772	1	3.485	3.238	3.008	4.463	5.933	9.235
13010	Cst3	NM_009976	chr2	148697458	148701248	-	791	1	Cst3|CysC|-|2 G3|2 73.6 cM|protein-coding	0.354876	0.0330753	0.601181	1.5034	1.79e-08	7.45e-07	2.01473	5.37e-29	2.15e-27	-0.160332	0.332583	1	-0.0627961	0.716791	1	33.141	35.538	35.262	47.188	95.989	166.814
13011	Cst7	NM_009977	chr2	150396151	150404680	+	980	1	Cst7|Cmap|-|2|2 G1-G3|protein-coding	-0.831949	0.00349617	0.116767	-1.91078	0.00259164	0.0318453	-2.38749	9.21e-10	1.02e-08	-0.431681	0.114537	1	-0.58453	0.0338295	1	1.645	1.455	2.111	1.242	0.468	0.474
78617	Cstad	NM_030137	chr2	30450564	30464465	+	813	1	Cstad|9530039B02Rik|-|2|2 B|protein-coding	2.47626	1	1	4.31511	0.121044	0.567294	6.364	1.77e-05	0.000109177	2.29496	1	1	3.69734	0.281313	1	0.014	0.045	0	0.02	0.063	0.346
664799	Ctcfl	NM_001081387	chr2	172919110	172945026	-	3204	1	Ctcfl|Boris|OTTMUSG00000016680|-|2|2 H3|protein-coding	-0.80876	0.021821	0.463951	-3.99132	7.45e-11	4.49e-09	-4.40148	2.04e-15	3.79e-14	0.60676	0.0416529	1	0.725135	0.0177807	0.775992	0.536	0.554	0.341	0.2	0.02	0.018
52468	Ctdsp2	NM_001113470	chr10	126415773	126437031	+	4813	1	Ctdsp2|AI586070|D10Ertd73e|OS-4|OS4|SCP2|-|10 D3|10 74.35 cM|protein-coding	-0.129977	0.421475	1	0.467283	0.0773722	0.42353	1.09578	7.68e-11	9.57e-10	0.161167	0.304261	1	0.166155	0.304504	1	12.837	12.762	11.054	10.679	15.893	26.937
107869	Cth	NM_145953	chr3	157557212	157588027	-	1787	1	Cth|0610010I13Rik|AI314617|BC019483|CSE|Cys3|-|3|3 H4|protein-coding	-0.246632	0.11311	1	-1.06276	1.02e-05	0.000255739	-2.68156	3.41e-51	3.22e-49	-0.415218	0.00954333	0.683001	-0.113768	0.465518	1	15.308	18.644	19.516	17.069	9.217	3.541
13025	Ctla2b	NM_001145801	chr13	60996712	60998808	-	1141	1	Ctla2b|AW545568|Ctla-2b|-|13|13|protein-coding	-3.52717	0.282272	1	-1.19772	0.670091	1	2.44218	0.00688563	0.0254697	-0.592639	1	1	-3.70833	0.282361	1	0.028	0	0.042	0	0.015	0.285
54366	Ctnnal1	NM_018761	chr4	56823807	56878083	-	3666	1	Ctnnal1|ACRP|AI616177|AW545119|C86009|Catnal1|-|4|4 C1|protein-coding	0.859997	0.575301	1	2.46205	0.00062093	0.00967774	3.6537	3.62e-11	4.69e-10	-1.27291	0.480019	1	0.199841	1	1	0.006	0.02	0.016	0.031	0.09	0.246
67087	Ctnnbip1	NM_023465	chr4	148892350	148940546	+	2662	1	Ctnnbip1|1110008O09Rik|2310001I19Rik|AW457332|Catnbip1|Icat|-|4|4 E2|protein-coding	-0.00541871	1	1	0.946673	0.00307037	0.036533	1.29711	7.75e-08	6.82e-07	0.240505	0.367312	1	0.319976	0.236644	1	0.65	0.663	0.525	0.55	1.001	1.511
18163	Ctnnd2	NM_008729	chr15	30102348	30959098	+	5921	1	Ctnnd2|Catnd2|Nprap|neurojugin|-|15|15 B2|protein-coding	-0.79139	1.09e-05	0.000973683	-3.09258	1.27e-13	1.13e-11	-4.23805	2.93e-56	3.16e-54	-0.247354	0.184844	1	-0.148084	0.39324	1	1.502	1.579	1.707	1.033	0.177	0.105
83429	Ctns	NM_031251	chr11	72996635	73012521	-	2997	1	Ctns|AI195360|AW049661|-|11|11 B4|protein-coding	0.298134	0.137446	1	0.475121	0.156813	0.677365	1.29528	2.09e-11	2.78e-10	-0.121228	0.566571	1	0.0358157	0.869141	1	1.296	1.411	1.361	1.712	1.978	3.862
51797	Ctps	NM_016748	chr4	120212473	120242881	-	2684	1	Ctps|Ctps1|-|4 D2.2|4 56.52 cM|protein-coding	-0.0583901	0.717193	1	-0.853882	0.000796254	0.011918	-1.33651	1.28e-16	2.6e-15	0.0514646	0.741357	1	0.0656281	0.68252	1	58.699	58.753	54.4	54.549	29.733	25.003
19025	Ctsa	NM_001038492	chr2	164658372	164666532	+	3531	1	Ctsa|AU019505|PPCA|Ppgb|-|2 H3|2 85.27 cM|protein-coding	0.24024	0.120975	1	0.867786	0.000415317	0.00684051	1.91549	3.89e-32	1.83e-30	0.0359947	0.816392	1	0.069283	0.65938	1	7.868	7.688	7.277	8.732	13.198	31.671
13032	Ctsc	NM_009982	chr7	95426595	95464371	+	7457	1	Ctsc|AI047818|CatC|DPP1|DPPI|-|7|7 D3-E1.1|protein-coding	-2.93702	0.0932023	1	-0.394479	0.780674	1	4.81607	3.4e-33	1.68e-31	-5.70849	0.00439524	0.431398	-1.26744	0.276588	1	0	0.008	0.019	0.002	0.015	0.637
13033	Ctsd	NM_009983	chr7	149561821	149573775	-	1943	1	Ctsd|CD|CatD|-|7|7 F5|protein-coding	0.0601657	0.705226	1	0.184946	0.465995	1	1.07551	9.67e-11	1.19e-09	-0.0629512	0.682149	1	-0.0500884	0.75392	1	26.336	26.473	26.364	28.663	30.364	64.596
13039	Ctsl	NM_009984	chr13	64463198	64471828	-	3499	1	Ctsl|1190035F06Rik|CatL|Ctsl1|MEP|fs|nkt|-|13 B3|13 33.26 cM|protein-coding	1.95149	1.09e-20	1.31e-17	3.98182	3.29e-38	1.93e-35	5.61361	6.52e-152	4.02e-149	0.721037	0.0020101	0.236946	0.617843	0.0090628	0.508002	0.844	0.766	0.494	1.974	7.334	28.085
229445	Ctso	NM_177662	chr3	81736538	81760647	+	3443	1	Ctso|A330105D01Rik|A430056C07|AI118514|-|3|3 E3|protein-coding	-0.0455445	0.89834	1	1.04062	0.00204208	0.0261758	1.68628	7.75e-11	9.65e-10	-0.612648	0.037802	1	-0.5067	0.103687	1	0.331	0.347	0.481	0.487	0.996	1.826
104002	Ctsq	NM_029636	chr13	61136403	61141958	-	1316	1	Ctsq|1600010J02Rik|-|13 B3|13 32.65 cM|protein-coding	5.13e-15	1	1	3.62688	0.340702	1	9.3427	3.14e-31	1.41e-29	0	1	1	0	1	1	0	0	0	0	0.029	1.71
13040	Ctss	NM_001267695	chr3	95330708	95360327	+	1350	1	Ctss|Cats|-|3 F2.1|3 40.74 cM|protein-coding	2.65879	0.00190803	0.0732945	3.04819	0.00103652	0.0148896	3.15053	4.97e-05	0.000281662	-0.614203	1	1	1.33865	0.26545	1	0.017	0.072	0.026	0.183	0.218	0.292
13041	Ctsw	NM_009985	chr19	5465043	5468507	-	1426	1	Ctsw|lymphopain|-|19|19 A|protein-coding	-0.793313	0.028629	0.550131	-2.33906	4.14e-06	0.000112693	-1.05399	0.00514815	0.0195542	1.03383	0.000626551	0.101802	1.01539	0.000456104	0.0623178	1.32	1.254	0.618	0.369	0.125	0.345
330695	Ctxn1	NM_183315	chr8	4257646	4259274	-	1222	1	Ctxn1|BC028881|Ctxn|-|8 A1.1|8 1.99 cM|protein-coding	0.0177627	0.959758	1	0.595905	0.0588058	0.351504	2.77678	8.1e-33	3.89e-31	0.310633	0.213745	1	0.339755	0.180886	1	1.569	1.572	1.212	1.265	1.794	9.678
78309	Cul9	NM_001081335	chr17	46637558	46683337	-	7801	1	Cul9|1810035I07Rik|Cul-9|Parc|mKIAA0708|-|17|17 C|protein-coding	-2.10895	0.0830726	1	2.45275	0.000174615	0.00328044	2.90182	1.29e-08	1.25e-07	-1.26681	0.190918	1	-1.05914	0.324842	1	0.012	0.012	0.027	0.006	0.154	0.245
15945	Cxcl10	NM_021274	chr5	92775665	92777915	-	1094	1	Cxcl10|C7|CRG-2|INP10|IP-10|IP10|Ifi10|Scyb10|gIP-10|mob-1|-|5 E2|5 46.57 cM|protein-coding	-1.04556	0.00023062	0.0132041	-0.541828	0.148067	0.652597	-1.11576	6.46e-05	0.000358411	0.401511	0.154435	1	0.218378	0.391023	1	2.205	1.855	1.612	0.812	1.037	0.861
12767	Cxcr4	NM_009911	chr1	130484776	130488876	-	1810	1	Cxcr4|CD184|Cmkar4|LESTR|PB-CKR|PBSF/SDF-1|Sdf1r|b2b220Clo|-|1 E4|1 56.43 cM|protein-coding	-0.816701	1.39e-06	0.000156728	-1.29297	8.46e-07	2.64e-05	-2.31251	1.44e-38	8.9e-37	-0.0749922	0.641844	1	-0.114342	0.490054	1	94.428	89.653	94.981	56.851	37.779	22.322
12145	Cxcr5	NM_007551	chr9	44319870	44334504	-	2611	1	Cxcr5|Blr1|CXC-R5|CXCR-5|Gpcr6|MDR15|-|9 A5.2|9 24.84 cM|protein-coding	-0.453217	0.638267	1	0.760379	0.296034	0.967615	2.08181	7.53e-05	0.000412143	0.644168	0.307352	1	0.911361	0.192514	1	0.081	0.097	0.05	0.038	0.078	0.248
80901	Cxcr6	NM_030712	chr9	123715595	123720872	+	1889	1	Cxcr6|BB217514|BONZO|STRL33|-|9 74.57 cM|9 F|protein-coding	-0.915149	0.106165	1	-3.00324	0.000258357	0.00458503	-3.09393	6.16e-05	0.000342996	-0.0149061	1	1	-0.281396	0.629439	1	0.181	0.147	0.174	0.096	0.02	0.022
67393	Cxxc5	NM_133687	chr18	35989472	36021342	+	2267	1	Cxxc5|4930415K17Rik|-|18|18 B3|protein-coding	-1.178	5.17e-13	1.94e-10	-1.22163	5.21e-07	1.7e-05	-1.1417	5.89e-12	8.27e-11	0.217159	0.153235	1	0.0793476	0.61322	1	15.197	13.46	12.589	5.766	5.258	6.606
109672	Cyb5a	NM_025797	chr18	85020806	85049255	+	742	1	Cyb5a|0610009N12Rik|Cyb5|-|18 E4|18 57.53 cM|protein-coding	-0.205008	0.247387	1	-0.0883533	0.76413	1	-1.03732	1.07e-08	1.05e-07	-0.292807	0.0984801	1	-0.267339	0.132528	1	45.272	45.634	52.577	47.645	45.649	30.096
13058	Cybb	NM_007807	chrX	9012380	9046450	-	4735	1	Cybb|C88302|CGD91-phox|Cgd|Cyd|Nox2|gp91-1|gp91phox|-|X|X A1.1|protein-coding	0.237679	0.794145	1	-0.501093	0.460724	1	-1.58482	0.0134714	0.0464374	-0.384311	0.432194	1	0.250533	0.724631	1	0.05	0.077	0.062	0.076	0.043	0.024
73649	Cybrd1	NM_028593	chr2	70956111	70980983	+	5202	1	Cybrd1|2210407P13Rik|Dcytb|-|2|2 C3|protein-coding	1.60615	0.0376072	0.654434	-1.33949	0.358217	1	2.35459	0.000407787	0.00193872	1.89865	0.00466652	0.452484	1.49599	0.0568186	1	0.054	0.039	0.014	0.044	0.005	0.084
13070	Cyp11a1	NM_019779	chr9	57862824	57874830	+	1763	1	Cyp11a1|Cyp11a|Cypxia1|D9Ertd411e|P450scc|Scc|cscc|-|9 B|9 31.63 cM|protein-coding	-0.0249674	0.89058	1	-2.08244	1.36e-13	1.21e-11	-3.59119	5.88e-52	5.68e-50	0.228856	0.245339	1	0.121144	0.579431	1	6.467	5.632	5.327	5.447	1.222	0.51
13079	Cyp21a1	NM_009995	chr17	34938293	34941371	-	1911	1	Cyp21a1|21-OH|21OH|21OHA|21OHB|CYP21OH-A|Cyp21|Cyp21-ps1|Cyp21B|Cyp21a2-ps|Cyp21a2ps|Oh21-1|Oh21-2|-|17 B1|17 18.36 cM|protein-coding	2.94891	4.18e-05	0.0030431	7.60508	1.83e-56	3.14e-53	10.6992	1.22e-240	2.45e-237	-1.80784	0.407977	1	-1.76732	0.413422	1	0.006	0.006	0.025	0.207	4.996	50.481
13081	Cyp24a1	NM_009996	chr2	170308457	170322645	-	3297	1	Cyp24a1|24-OHase|CP24|Cyp24|-|2 H3|2 91.91 cM|protein-coding	2.47599	1	1	7.8633	4.36e-11	2.75e-09	7.35313	1.65e-10	1.99e-09	0	1	1	0	1	1	0	0	0	0.005	0.201	0.171
104086	Cyp27a1	NM_024264	chr1	74760109	74784471	+	1925	1	Cyp27a1|1300013A03Rik|Cyp27|-|1 38.54 cM|1 C3|protein-coding	-0.526186	1	1	6.47694	3.21e-21	5.94e-19	9.07301	1.11e-113	3.92e-111	-3.22225	0.531235	1	-0.817406	1	1	0	0.006	0.012	0.009	1.139	8.628
13088	Cyp2b10	NM_009999	chr7	26682677	26711643	+	1867	1	Cyp2b10|Cyp2b|Cyp2b20|p16|-|7 A3|7 14.11 cM|protein-coding	5.13e-15	1	1	4.9086	0.0308675	0.221119	6.73394	3.7e-07	2.96e-06	0	1	1	3.29435	0.539736	1	0	0.013	0	0	0.048	0.196
72082	Cyp2c55	NM_028089	chr19	39081509	39117177	+	1978	1	Cyp2c55|2010318C06Rik|-|19|19 C3|protein-coding	-0.0381478	0.875917	1	-0.215158	0.492063	1	-1.41345	8.98e-09	8.87e-08	-0.463056	0.0311122	1	-0.302273	0.167447	1	1.184	1.301	1.563	1.579	1.295	0.683
13109	Cyp2j5	NM_010007	chr4	96294123	96330810	-	3640	1	Cyp2j5|-|-|4 C5|4 44.71 cM|protein-coding	5.13e-15	1	1	6.02276	0.000354335	0.00600895	8.32648	6.36e-18	1.41e-16	0	1	1	0	1	1	0	0	0	0	0.053	0.305
56050	Cyp39a1	NM_018887	chr17	43804321	43888380	+	3092	1	Cyp39a1|mCYP39A1|-|17|17 B3|protein-coding	-0.275077	0.126927	1	-0.620194	0.0176914	0.146245	-1.92507	1.84e-17	3.97e-16	-0.397883	0.0246519	1	-0.290271	0.107124	1	1.861	1.973	2.353	2.01	1.497	0.719
13120	Cyp4b1	NM_007823	chr4	115297333	115320310	-	1857	1	Cyp4b1|-|-|4 D1|4 53.06 cM|protein-coding	5.13e-15	1	1	4.95623	0.030656	0.220318	5.84943	0.000566356	0.00262058	0	1	1	0	1	1	0	0	0	0	0.048	0.106
170716	Cyp4f13	NM_130882	chr17	33061633	33084306	-	1696	1	Cyp4f13|0610030I10Rik|Cypf13|-|17|17 B1|protein-coding	0.245482	0.57276	1	1.21603	0.00168841	0.0224397	1.98505	8.88e-11	1.1e-09	-0.034874	0.974263	1	-0.020687	1	1	0.888	0.883	0.894	1.125	2.007	4.038
64385	Cyp4f14	NM_001204336	chr17	33042015	33054287	-	2190	1	Cyp4f14|1300014O15Rik|cyp4f-14|-|17|17 B1|protein-coding	0.32578	0.735216	1	2.161	3.5e-05	0.000776962	2.15383	1.12e-06	8.35e-06	-0.505404	0.488893	1	-0.562618	0.477091	1	0.058	0.048	0.087	0.114	0.354	0.439
106648	Cyp4f15	NM_134127	chr17	32822604	32840294	+	2118	1	Cyp4f15|AI787289|Cyp4f-15|-|17|17 B1|protein-coding	0.234374	1	1	1.28904	0.0576596	0.346982	1.70417	0.00551119	0.0207789	-2.09214	0.0825152	1	0.428382	0.689914	1	0.011	0.068	0.05	0.062	0.12	0.193
70101	Cyp4f16	NM_024442	chr17	32673574	32688742	+	2152	1	Cyp4f16|2310021J05Rik|AI746515|-|17|17 B1|protein-coding	0.64109	0.000648302	0.0310552	2.18344	1.01e-16	1.23e-14	2.23777	1.43e-33	7.16e-32	0.098484	0.625892	1	0.219056	0.276258	1	2.28	2.419	2.037	3.308	9.123	11.22
208285	Cyp4f17	NM_001101445	chr17	32643407	32665839	+	1679	1	Cyp4f17|EG208285|-|17|17 B1|protein-coding	0.230172	0.866983	1	1.57798	0.00471435	0.0518363	1.54482	0.00108209	0.0047406	-0.0624053	1	1	-0.617512	0.511666	1	0.112	0.072	0.112	0.137	0.342	0.385
72054	Cyp4f18	NM_024444	chr8	74512381	74533525	-	1687	1	Cyp4f18|1810054N16Rik|Cyp4f3|Cypf18|-|8|8 C1|protein-coding	1.7387	0.644984	1	3.1012	0.0288468	0.211277	6.61329	3.23e-25	1.09e-23	-2.36073	1	1	1.41622	0.651382	1	0	0.021	0.007	0.029	0.076	0.992
677156	Cyp4f37	NM_001100187	chr17	32758264	32773129	+	2627	1	Cyp4f37|Gm9705|-|17 B1|17|protein-coding	0.722508	0.00487198	0.151954	1.972	1.99e-10	1.14e-08	2.38097	2.68e-26	9.45e-25	-0.0117919	1	1	0.143935	0.616788	1	0.484	0.533	0.47	0.801	1.844	2.843
13121	Cyp51	NM_020010	chr5	4080674	4104697	-	4341	1	Cyp51|AI426508|CYPLI|Cyp51a1|Ldm|P450-14DM|P450LI|-|5 2.3 cM|5 A2|protein-coding	0.15262	0.340449	1	0.895699	0.000629464	0.00978457	1.04875	6.93e-11	8.69e-10	-0.108942	0.484865	1	-0.0694445	0.664516	1	52.884	53.811	54.725	62.875	102.325	131.514
13122	Cyp7a1	NM_007824	chr4	6192759	6202778	-	4164	1	Cyp7a1|-|-|4|4 A1|protein-coding	1.16384	0.225771	1	3.14429	2.19e-06	6.31e-05	4.7173	5.79e-30	2.45e-28	-1.96014	0.161382	1	-2.72008	0.0798517	1	0.006	0.003	0.023	0.051	0.193	0.716
13123	Cyp7b1	NM_007825	chr3	17971950	18143338	-	2158	1	Cyp7b1|AW261589|D3Ertd552e|hct-1|-|3 A1|3 4.98 cM|protein-coding	0.42921	0.788327	1	1.10345	0.201487	0.781986	3.32296	1.03e-06	7.73e-06	-0.610555	0.769392	1	-0.942166	0.537058	1	0.022	0.017	0.033	0.046	0.071	0.398
58861	Cysltr1	NM_021476	chrX	103771848	103799018	-	2973	1	Cysltr1|BB147369|CysLT1R|Cyslt1|-|X|X D|protein-coding	0.0340433	0.847468	1	-0.378587	0.142095	0.631836	-1.21292	8.47e-10	9.39e-09	-0.345327	0.0491383	1	-0.212877	0.246043	1	2.326	2.556	2.849	3.006	2.136	1.414
72318	Cyth4	NM_028195	chr15	78427477	78452449	+	2776	1	Cyth4|2510004M07Rik|5830469K17Rik|AI467541|Pscd4|mFLJ00017|-|15|15 E1|protein-coding	0.610841	0.000103317	0.00666079	0.765432	0.00150549	0.020366	1.99878	1.44e-30	6.21e-29	0.148934	0.347255	1	0.0828044	0.611633	1	7.303	6.819	6.322	10.022	10.75	29.321
227929	Cytip	NM_139200	chr2	57981550	58012533	-	5725	1	Cytip|A130053M09Rik|AI462064|C80816|Cbp|Cybr|Pscdbp|-|2|2 C1.1|protein-coding	-1.52956	0.0349855	0.624108	-0.495007	0.471317	1	1.22686	0.00630491	0.0234988	-1.04681	0.102937	1	-1.27356	0.0979566	1	0.021	0.017	0.041	0.014	0.029	0.113
67102	D16Ertd472e	NM_001252438	chr16	78540581	78576933	-	6153	1	D16Ertd472e|1700010I10Rik|2310009O17Rik|E330003K22Rik|Eurl|-|16 C3.1|16 45.36 cM|protein-coding	-0.0970092	0.550211	1	-0.453487	0.060614	0.358125	-1.05373	6.43e-10	7.23e-09	-0.0090427	0.958556	1	-0.0721846	0.657171	1	3.192	3.018	3.083	3.014	2.213	1.726
241589	D430041D05Rik	NM_001033347	chr2	103983232	104250491	-	10099	1	D430041D05Rik|9630056G07Rik|G2|-|2 E2|2 54.59 cM|protein-coding	-0.0289618	0.889479	1	-2.8902	1.51e-20	2.59e-18	-3.26598	8.12e-34	4.09e-32	0.021008	0.914635	1	-0.118973	0.554612	1	11.433	10.328	10.996	11.182	1.501	1.301
242484	D630039A03Rik	NM_178727	chr4	57921256	57929136	-	2892	1	D630039A03Rik|-|-|4|4 B3|protein-coding	0.0108822	0.949084	1	0.327705	0.210312	0.802121	-1.16252	4.64e-10	5.3e-09	0.0993899	0.569484	1	-0.0499869	0.797995	1	5.639	4.916	5.093	5.237	6.471	2.626
380765	D830013O20Rik	NR_046013	chr12	74465062	74510550	-	685	1	D830013O20Rik|Gm891|-|12|12 C3|ncRNA	3.32961	0.534798	1	7.50856	3.22e-08	1.29e-06	7.3888	1.1e-10	1.34e-09	0	1	1	0	1	1	0	0	0	0.048	0.726	0.842
244418	D8Ertd82e	NM_172911	chr8	37157882	37210841	+	4772	1	D8Ertd82e|9830148H23|NACK|Sgk223|mFLJ00269|-|8 A4|8 22.78 cM|protein-coding	-0.52806	0.00665652	0.194969	-1.34658	2.56e-06	7.23e-05	-1.63921	9.68e-13	1.47e-11	0.264372	0.14629	1	0.183471	0.321226	1	6.004	5.559	4.862	3.491	1.942	1.786
100662	D930016D06Rik	NR_030673	chr5	104954754	104983230	+	3805	1	D930016D06Rik|100041172|1110004B06Rik|AI451450|Gm3179|-|5|5 E5|ncRNA	0.128881	0.51637	1	0.0567724	0.84955	1	1.0149	1.77e-07	1.48e-06	0.265811	0.225919	1	0.299671	0.193828	1	2.35	2.28	1.9	2.135	1.967	4.42
13138	Dag1	NM_010017	chr9	108107192	108166146	-	5585	1	Dag1|D9Wsu13e|DG|Dp427|Dp71|-|9 F2|9 59.08 cM|protein-coding	0.830569	1.86e-06	0.000199456	1.56617	1.07e-07	3.98e-06	2.04316	6.45e-30	2.72e-28	0.117149	0.485107	1	0.0976272	0.569116	1	9.463	9.163	8.438	15.437	26.098	40.325
13143	Dapk2	NM_010019	chr9	66006033	66120049	+	1755	1	Dapk2|-|-|9 C|9 35.75 cM|protein-coding	1.96069	7.16e-07	8.75e-05	5.08573	4.45e-40	2.97e-37	7.06732	4.4e-132	1.71e-129	0.549164	0.267656	1	0.493891	0.267968	1	0.215	0.2	0.141	0.572	4.634	22.188
76747	Dapl1	NM_029723	chr2	59322710	59343078	+	568	1	Dapl1|2310032F03Rik|EEDA|-|2|2 C3|protein-coding	-1.10522	0.0117334	0.300803	-2.92569	4.11e-06	0.000112036	-5.66455	6.4e-13	9.85e-12	-1.2559	0.00200675	0.236946	-1.43199	0.000625235	0.0798959	0.58	0.51	1.324	0.637	0.18	0.025
26377	Dapp1	NM_011932	chr3	137593971	137644513	-	3076	1	Dapp1|Bam32|-|3|3 H2|protein-coding	0.657461	2.52e-05	0.001974	1.386	7.38e-08	2.8e-06	2.02824	4.56e-34	2.33e-32	-0.188549	0.233088	1	-0.22297	0.195057	1	7.256	7.14	7.91	12.942	21.178	37.644
13167	Dbi	NM_007830	chr1	122009857	122017673	-	581	1	Dbi|ACBD1|Acbp|EP|endozepine|-|1|1 E2|protein-coding	-0.0683654	0.684431	1	0.230636	0.394915	1	-1.2794	8.64e-14	1.42e-12	-0.196337	0.238212	1	-0.10932	0.518709	1	108.446	114.19	118.208	117.988	131.079	57.049
56320	Dbn1	NM_001177372	chr13	55574789	55589437	-	2893	1	Dbn1|-|-|13 B1|13 30.06 cM|protein-coding	-0.248514	1	1	-1.16979	0.602848	1	2.36603	7.32e-05	0.00040188	-0.246527	1	1	-1.86579	0.134356	1	0.028	0.008	0.033	0.028	0.013	0.199
72185	Dbndd1	NM_028146	chr8	126029587	126039355	-	1663	1	Dbndd1|2810427I04Rik|D8Ertd590e|-|8 E2|8 72.1 cM|protein-coding	0.235075	0.628643	1	-0.371146	0.535455	1	1.13207	0.00512439	0.0194812	0.109003	0.838936	1	0.21711	0.646713	1	0.608	0.647	0.558	0.682	0.452	1.387
52840	Dbndd2	NM_001048229	chr2	164313611	164318823	+	3599	1	Dbndd2|1110017A21Rik|2900022J10Rik|AU041050|AW048677|D2Bwg0891e|Nkip|R74724|-|2 H3|2 85.17 cM|protein-coding	0.427347	0.142966	1	0.939086	0.0119552	0.10869	1.78192	2.47e-12	3.61e-11	0.157647	0.568779	1	0.135561	0.603166	1	0.412	0.403	0.359	0.497	0.628	1.426
83703	Dbr1	NM_031403	chr9	99476218	99484762	+	2093	1	Dbr1|AW018415|-|9|9 F1|protein-coding	-0.0172098	0.91526	1	-0.482837	0.045927	0.294156	-1.0021	4.4e-10	5.03e-09	0.0183623	0.909522	1	0.119431	0.451431	1	20.182	21.292	19.027	19.562	13.29	11.093
13171	Dbt	NM_010022	chr3	116215997	116252899	+	3279	1	Dbt|D3Wsu60e|-|3 G1|3 50.37 cM|protein-coding	-0.0401123	0.79963	1	-0.587749	0.016149	0.137039	-1.02686	1.01e-10	1.23e-09	0.0652436	0.668307	1	0.0735452	0.644459	1	12.401	12.415	11.392	11.569	7.655	6.485
195208	Dcdc2a	NM_177577	chr13	25147873	25302575	+	6871	1	Dcdc2a|AW492955|Dcdc2|RU2|-|13|13 A3.1|protein-coding	0.306683	1	1	5.2794	3.06e-09	1.5e-07	6.79336	4.84e-28	1.88e-26	-2.36198	1	1	-2.34102	1	1	0	0	0.002	0.002	0.082	0.276
233651	Dchs1	NM_001162943	chr7	112901503	112936064	-	10628	1	Dchs1|3110041P15Rik|C130033F22Rik|CDH25|FIB1|Gm165|PCDH16|-|7|7 E3|protein-coding	-0.486099	1	1	2.4043	0.0773498	0.423504	3.28375	0.00454476	0.0174553	-0.0371702	1	1	-0.852486	1	1	0.002	0.001	0.002	0.002	0.013	0.028
70762	Dclk2	NM_027539	chr3	86590072	86724806	-	4029	1	Dclk2|6330415M09Rik|AU044875|CL2|CLICK2|Click-II|Dcamkl2|-|3|3 F1|protein-coding	-0.018134	0.927855	1	-0.723946	0.00507417	0.0549881	-1.04758	3.32e-08	3.06e-07	0.0678521	0.70177	1	-0.0348139	0.854749	1	5.157	4.674	4.77	4.816	2.879	2.656
320685	Dctd	NR_027759	chr8	49195312	49227021	+	2695	1	Dctd|6030466N05Rik|-|8|8 B1.2|protein-coding	-0.0442339	0.77722	1	-1.26577	1.58e-07	5.66e-06	-1.5796	1.89e-22	5.56e-21	-0.0158918	0.918442	1	0.0218278	0.890227	1	18.855	19.182	18.2	17.982	7.157	6.997
66422	Dctpp1	NM_023203	chr7	134400476	134404181	-	626	1	Dctpp1|2410015N17Rik|AI854235|RS21-C6|-|7|7 F3|protein-coding	-0.41021	0.120302	1	-0.198258	0.645353	1	-1.71621	2.98e-10	3.48e-09	-0.578776	0.0271275	1	-0.433104	0.100824	1	84.129	90.91	117.297	93.405	88.951	42.727
51793	Ddah2	NM_001190449	chr17	35195980	35199044	+	1341	1	Ddah2|1110003M04Rik|AU019324|AW413173|DDAH-2|DDAHII|Ddah|G6a|NG30|-|17|17 B1|protein-coding	0.249953	0.715157	1	0.834662	0.047892	0.30267	1.80956	1.83e-08	1.74e-07	-0.240595	0.622069	1	0.163247	0.696079	1	0.307	0.378	0.351	0.441	0.599	1.426
13195	Ddc	NM_016672	chr11	11714104	11790411	-	1939	1	Ddc|Aadc|-|11 7.09 cM|11 A1-A4|protein-coding	-0.169378	0.274107	1	-1.29743	1.51e-07	5.41e-06	-2.77878	1.7e-39	1.09e-37	0.138236	0.374096	1	0.108834	0.486878	1	19.825	19.182	17.24	15.926	6.745	2.916
72108	Ddhd2	NM_028102	chr8	26835796	26864752	-	4247	1	Ddhd2|2010305K11Rik|SAMWD1|mKIAA0725|-|8|8 A3|protein-coding	0.468071	0.0169415	0.388065	0.909608	0.000733353	0.0111191	1.67022	1.64e-18	3.81e-17	0.257088	0.187403	1	0.299956	0.129889	1	2.671	2.702	2.167	3.097	4.046	7.934
68817	Ddi2	NM_001017966	chr4	141239478	141279334	-	3527	1	Ddi2|1110056G13Rik|1700027M01Rik|9130022E05Rik|AI604911|AU040698|-|4|4 E1|protein-coding	0.190815	0.249221	1	0.593448	0.0307915	0.22083	1.18671	1.99e-12	2.95e-11	0.092499	0.561224	1	0.0171212	0.92011	1	18.151	17.17	16.446	19.501	25.586	43.288
74747	Ddit4	NM_029083	chr10	59412423	59414518	-	1680	1	Ddit4|5830413E08Rik|AA415483|REDD1|Rtp801|dig2|-|10|10 B3|protein-coding	0.512998	0.00294164	0.102518	1.35624	3.78e-07	1.27e-05	1.35473	8.97e-15	1.59e-13	-0.167029	0.321834	1	-0.00692559	0.968997	1	52.135	56.69	55.755	82.705	141.488	167.111
18214	Ddr2	NM_022563	chr1	171902438	172019075	-	8271	1	Ddr2|AW495251|Ntrkr3|tyro10|-|1 76.84 cM|1 H1-H5|protein-coding	-0.0192446	1	1	0.441806	0.299337	0.974096	-1.26572	0.00106924	0.00469281	0.0525734	0.9474	1	-0.18753	0.660912	1	0.1	0.082	0.092	0.093	0.116	0.044
13202	Ddt	NM_010027	chr10	75233978	75236119	-	604	1	Ddt|C78655|-|10 C1|10 38.58 cM|protein-coding	-0.280716	0.150264	1	-0.0988519	0.735341	1	-1.23332	3.48e-09	3.59e-08	-0.297146	0.126032	1	-0.3054	0.123409	1	28.948	28.52	33.686	29.075	29.612	16.88
68278	Ddx39	NM_197982	chr8	86239076	86247250	+	1646	1	Ddx39|2610307C23Rik|BAT1|DDXL|Ddx39a|URH49|-|8|8 C2|protein-coding	-0.05715	0.736211	1	-0.386214	0.15225	0.664663	-1.17744	7.42e-12	1.04e-10	-0.106068	0.522453	1	-0.0480672	0.77665	1	122.393	125.653	125.46	125.681	91.939	64.948
100048658	Ddx43	NM_001191044	chr9	78243584	78271396	+	2190	1	Ddx43|ENSMUSG00000070291|OTTMUSG00000019690|-|9|9 E1|protein-coding	5.13e-15	1	1	5.13e-15	1	1	5.06693	0.0138793	0.0476385	0	1	1	0	1	1	0	0	0	0	0	0.051
230073	Ddx58	NM_172689	chr4	40150810	40186858	-	4923	1	Ddx58|6430573D20Rik|C330021E21|RIG-I|RLR-1|-|4|4 A5|protein-coding	0.0736362	0.652969	1	0.771522	0.00746741	0.0753225	1.15757	4.84e-12	6.84e-11	0.138636	0.413891	1	0.0209758	0.897266	1	9.608	8.586	8.452	9.092	15.097	21.79
234311	Ddx60	NM_001293783	chr8	64406884	64516498	+	5954	1	Ddx60|9830118M07|-|8|8 B3.1|protein-coding	0.0916382	0.706322	1	0.644749	0.0291985	0.212897	1.56281	7.28e-12	1.02e-10	-0.154899	0.601962	1	-0.390314	0.23787	1	1.883	1.457	2.065	2.251	3.132	6.949
23853	Def6	NM_027185	chr17	28344723	28365553	+	2264	1	Def6|2410003F05Rik|6430538D02Rik|AV094905|Ibp|Slat|Slat2|Slat6|-|17|17 A3.3|protein-coding	1.26398	6.33e-15	3.46e-12	1.51045	3.24e-08	1.29e-06	1.27304	2.36e-15	4.35e-14	-0.0397131	0.79769	1	0.00539666	0.97614	1	21.937	22.485	21.691	53.643	63.498	60.785
70059	Degs2	NM_001171002	chr12	109925002	109940516	-	3180	1	Degs2|2210008A03Rik|AI852933|DES2|-|12|12 F1|protein-coding	0.476332	0.373002	1	1.9495	3.35e-05	0.000746066	3.81546	8.88e-37	5.11e-35	-0.0613846	0.900528	1	-0.836068	0.109584	1	0.093	0.053	0.092	0.134	0.337	1.53
70785	Dennd1c	NM_153551	chr17	57205478	57217933	-	2495	1	Dennd1c|4432409M07Rik|-|17|17 E1.1|protein-coding	0.40443	0.0832875	1	1.15306	0.000237138	0.00425875	2.85893	5.42e-40	3.56e-38	0.175882	0.48225	1	0.0107498	0.958528	1	1.839	1.578	1.588	2.142	3.546	13.228
329727	Dennd2c	NM_177857	chr3	102931479	102973656	+	4953	1	Dennd2c|A930010I20Rik|-|3|3 F2.2|protein-coding	-0.227451	0.49816	1	-0.378953	0.354201	1	-1.0235	0.00321063	0.0127424	0.336787	0.227338	1	0.193588	0.497326	1	0.328	0.29	0.252	0.222	0.196	0.142
72121	Dennd2d	NM_028110	chr3	106288958	106305948	+	4034	1	Dennd2d|2010308M01Rik|AI451421|-|3|3 F2.3|protein-coding	-0.390577	0.011651	0.29901	-1.87164	2.68e-14	2.6e-12	-3.28966	1.16e-66	1.71e-64	-0.0020381	0.990914	1	0.113393	0.477164	1	13.006	13.988	12.488	9.897	3.353	1.482
105841	Dennd3	NM_001081066	chr15	73342990	73402672	+	5274	1	Dennd3|AI447457|E030003N15Rik|-|15|15 D3|protein-coding	0.574711	0.0012454	0.0522605	-1.08196	5.8e-05	0.00123424	-1.53581	6.19e-11	7.82e-10	-0.354263	0.0506267	1	-0.464464	0.0119769	0.61409	2.931	2.666	3.635	5.612	1.721	1.437
229541	Dennd4b	NM_201407	chr3	90070436	90084587	+	5389	1	Dennd4b|-|-|3|3 F1|protein-coding	-0.0361869	0.847794	1	-0.0856211	0.743263	1	1.08434	4.59e-09	4.67e-08	0.110882	0.552314	1	0.0785253	0.677484	1	5.557	5.223	5.01	5.041	4.717	12.184
97998	Deptor	NM_145470	chr15	54943872	55090828	+	8538	1	Deptor|Depdc6|-|15 D1|15 21.96 cM|protein-coding	-0.538748	0.00170409	0.0666313	-2.96844	3.22e-24	7.37e-22	-3.49721	9.42e-62	1.2e-59	-0.414984	0.012527	0.807604	-0.444645	0.00876211	0.495799	13.271	12.84	17.122	12.202	2.231	1.743
28075	Desi1	NM_134095	chr15	81822953	81846570	-	2903	1	Desi1|AI427858|AI850401|D15Wsu75e|DeSI-1|Fam152b|Pppde2|-|15 E1|15 38.34 cM|protein-coding	-0.419173	0.00894051	0.242929	-1.60808	6.91e-10	3.64e-08	-2.01919	1.56e-31	7.12e-30	-0.110515	0.481568	1	-0.255759	0.110467	1	74.512	66.759	77.262	60.165	24.719	22.089
13139	Dgka	NM_016811	chr10	128157192	128181112	-	2787	1	Dgka|80kDa|AW146112|Dagk1|-|10 D3|10 77.14 cM|protein-coding	0.0303919	0.974305	1	1.18705	0.00076697	0.0115271	2.04304	1.21e-18	2.82e-17	-0.390397	0.152092	1	-0.363557	0.22607	1	0.616	0.602	0.784	0.844	1.848	3.734
217480	Dgkb	NM_178681	chr12	38607292	39359997	+	5517	1	Dgkb|6430574F24|90kda|C630029D13Rik|DAGK2|DGK|DGK-beta|mKIAA0718|-|12|12 A3|protein-coding	5.13e-15	1	1	3.62742	0.340165	1	6.20758	5e-05	0.000283436	0	1	1	0	1	1	0	0	0	0	0.007	0.046
110197	Dgkg	NM_138650	chr16	22466642	22657304	-	5478	1	Dgkg|2900055E17Rik|90kDa|AI854428|Dagk3|E430001K23Rik|mKIAA4131|-|16 B1|16 13.37 cM|protein-coding	-2.18555	1	1	3.70977	0.00842072	0.0829549	5.84796	5.28e-16	1.03e-14	-2.36166	1	1	1.50547	0.446614	1	0	0.007	0.002	0	0.03	0.18
320127	Dgki	NM_001081206	chr6	36796022	37249976	-	4562	1	Dgki|C130010K08Rik|-|6|6 B1|protein-coding	5.13e-15	1	1	5.13e-15	1	1	5.51332	0.00214741	0.0088181	0	1	1	0	1	1	0	0	0	0	0	0.034
13361	Dhfr	NM_010049	chr13	93124738	93159008	+	5282	1	Dhfr|8430436I03Rik|AA607882|AI662710|AW555094|-|13 C3|13 47.64 cM|protein-coding	-0.00668315	0.968672	1	-0.120868	0.629642	1	-1.13776	1.41e-12	2.12e-11	-0.038578	0.810237	1	-0.0814091	0.614085	1	11.893	11.453	11.665	12.038	10.487	6.19
56749	Dhodh	NM_020046	chr8	112117148	112132573	-	2307	1	Dhodh|2810417D19Rik|AI834883|-|8|8 D3|protein-coding	0.00136706	0.997069	1	-0.736869	0.0021084	0.0268685	-1.15873	3.4e-13	5.35e-12	-0.0255119	0.86913	1	0.000937144	0.99699	1	17.3	17.264	16.885	17.64	9.886	8.802
52585	Dhrs1	NM_026819	chr14	56357857	56364521	-	1460	1	Dhrs1|1110029G07Rik|AW112170|D14Ertd484e|-|14 C3|14 28.19 cM|protein-coding	0.273109	0.0938566	1	1.16151	4.93e-06	0.000131498	1.72944	4.94e-22	1.42e-20	0.100919	0.536225	1	0.0796881	0.673506	1	10.726	10.657	9.629	12.051	21.951	37.102
67487	Dhx40	NM_026191	chr11	86582351	86621162	-	3704	1	Dhx40|2410016C14Rik|ARG147|DDX40|PAD|-|11|11 C|protein-coding	-0.180269	0.746879	1	0.303602	0.595139	1	1.21555	0.001149	0.0050145	-1.2201	0.0207009	1	-1.56314	0.00289958	0.237164	0.054	0.042	0.121	0.111	0.151	0.33
80861	Dhx58	NM_030150	chr11	100556198	100565585	-	2397	1	Dhx58|B430001I08Rik|D11Lgp2e|LPG2|Lgp2|RLR-3|-|11 D|11 63.52 cM|protein-coding	0.546732	0.0144234	0.348581	0.594712	0.0794777	0.431325	1.33982	7.79e-13	1.19e-11	-0.342026	0.136369	1	-0.125582	0.661955	1	1.433	1.562	1.756	2.586	2.797	5.151
66254	Dimt1	NM_025447	chr13	107737209	107750304	+	2531	1	Dimt1|1500031M22Rik|AV111347|Dimt1l|-|13|13 D1|protein-coding	-0.351099	0.0637225	0.88319	-0.58027	0.0607043	0.358164	-1.03806	1.89e-07	1.58e-06	-0.202542	0.273085	1	-0.151824	0.423916	1	11.906	12.004	12.966	10.622	7.943	7.451
64451	Dip2a	NM_001081419	chr10	75725794	75808036	-	6315	1	Dip2a|4931420H10Rik|AI426328|Dip2|Kiaa0184-hp|mKIAA0184|-|10 C1|10 38.76 cM|protein-coding	0.291207	0.162056	1	0.821607	0.00575555	0.0608636	1.34463	6.96e-11	8.72e-10	0.201339	0.322491	1	0.341021	0.0943943	1	0.92	0.989	0.774	0.966	1.393	2.265
239667	Dip2b	NM_001159361	chr15	99869095	100049904	+	8874	1	Dip2b|4932422C22|AI317237|AI854602|mKIAA1463|-|15|15 F1|protein-coding	0.291083	0.108626	1	0.839934	0.00663756	0.0684449	1.15682	3.39e-10	3.92e-09	-0.0562807	0.750643	1	-0.158021	0.380448	1	9.265	8.441	9.358	11.77	17.549	23.988
208718	Dis3l2	NM_001172157	chr1	88600379	88946672	+	3147	1	Dis3l2|4930429A22Rik|8030493P09Rik|-|1|1 D|protein-coding	0.190267	0.287072	1	1.01963	0.000117984	0.00233897	1.23758	2.1e-12	3.1e-11	0.1463	0.396074	1	0.0832298	0.641347	1	9.497	9.085	8.36	9.889	17.086	22.651
245474	Dkc1	NM_001030307	chrX	72341193	72355115	+	2786	1	Dkc1|BC068171|-|X|X A7.3|protein-coding	-0.0902363	0.571431	1	-1.09174	2.22e-05	0.000522111	-1.47547	6.37e-20	1.61e-18	0.0424724	0.790096	1	0.0549253	0.734634	1	79.448	79.692	74.022	71.958	33.911	30.922
668253	Dleu2	NR_028264	chr14	62221673	62301210	-	1687	1	Dleu2|1810047A16Rik|4932411A06Rik|7730401J12Rik|AI197277|AI788824|Alt1|Gm9069|Leu2|-|14 C3|14 33.16 cM|ncRNA	-0.756935	0.0284738	0.548476	1.14214	0.00879745	0.0861019	2.03894	1.54e-15	2.9e-14	-0.271675	0.359642	1	-0.168621	0.693813	1	0.481	0.487	0.557	0.341	1.096	2.667
239133	Dleu7	NM_173419	chr14	62895066	62911816	-	1328	1	Dleu7|BC038059|-|14|14 D1|protein-coding	2.55866	1	1	5.13e-15	1	1	5.74694	0.000696081	0.003172	2.29505	1	1	0	1	1	0.009	0	0	0.012	0	0.138
13383	Dlg1	NM_007862	chr16	31664021	31873442	+	4749	1	Dlg1|B130052P05Rik|Dlgh1|E-dlg/SAP97|SAP-97|SAP97|mKIAA4187|-|16 B2|16 22.4 cM|protein-coding	-0.244451	0.133405	1	-1.14134	1.14e-05	0.000283242	-1.21987	8.45e-14	1.39e-12	-0.084744	0.595126	1	-0.0658108	0.690108	1	36.756	37.008	37.441	32.863	16.82	18.231
13385	Dlg4	NM_001109752	chr11	69832107	69859033	+	3295	1	Dlg4|Dlgh4|PSD-95|PSD95|SAP90|SAP90A|-|11|11 B4|protein-coding	-0.26434	0.107978	1	-0.0554681	0.841868	1	1.26567	5.59e-15	1e-13	0.135529	0.400605	1	0.160178	0.349954	1	7.938	7.754	6.978	6.033	7.057	19.398
242667	Dlgap3	NM_198618	chr4	126846448	126914266	+	3870	1	Dlgap3|BC058433|DAP-3|DAP3|Prpl8|Sapap3|-|4 D2.2|4 61.33 cM|protein-coding	-2.1855	1	1	2.25551	0.33152	1	6.66822	8.13e-24	2.57e-22	-2.36157	1	1	-2.34088	1	1	0	0	0.003	0	0.02	0.451
13388	Dll1	NM_007865	chr17	15504318	15512787	-	3415	1	Dll1|Delta1|-|17 A2|17 8.95 cM|protein-coding	-1.0897	0.487792	1	-0.0727409	1	1	2.83839	7.08e-05	0.000389462	-2.39765	0.163519	1	-4.67131	0.0526006	1	0.003	0	0.021	0.01	0.019	0.181
13390	Dlx1	NM_010053	chr2	71367502	71372038	+	2775	1	Dlx1|Dlx|Dlx-1|-|2 C2|2 42.61 cM|protein-coding	-0.010937	0.949893	1	0.672645	0.00509212	0.0551081	2.43282	1.26e-47	1.07e-45	0.191923	0.235795	1	0.229968	0.166149	1	8.48	8.432	7.158	7.383	11.076	44.762
111970	Dlx1as	NR_002854	chr2	71368695	71375948	-	2791	1	Dlx1as|Dix1as|Dlx1os|-|2 C2|2 42.58 cM|ncRNA	-0.0366097	0.832183	1	0.739905	0.0029679	0.0356846	2.4076	2.06e-46	1.67e-44	0.190266	0.292855	1	0.365506	0.0443025	1	4.317	4.7	3.651	3.723	5.901	22.432
13392	Dlx2	NM_010054	chr2	71381465	71384811	-	2468	1	Dlx2|AW121999|Dlx-2|Tes-1|-|2 C2|2 42.65 cM|protein-coding	-0.328736	0.130692	1	0.668215	0.0139696	0.122601	3.34826	2.54e-66	3.64e-64	0.162639	0.431994	1	0.427662	0.0684105	1	1.583	1.801	1.357	1.133	2.118	16.068
71241	Dmrtc2	NM_027732	chr7	25655076	25662670	+	1608	1	Dmrtc2|4933432E21Rik|Dmrt7|-|7|7 A3|protein-coding	-0.0575767	0.761808	1	-0.709538	0.012775	0.114542	-1.24018	5.86e-08	5.23e-07	0.106717	0.564817	1	0.0782516	0.68884	1	5.078	4.913	4.503	4.54	2.632	2.221
327762	Dna2	NM_177372	chr10	62409777	62436936	+	4099	1	Dna2|Dna2l|E130315B21Rik|-|10|10 B4|protein-coding	0.09248	0.566063	1	-0.467206	0.0597273	0.355071	-1.29983	1.46e-15	2.75e-14	0.0971388	0.534801	1	0.0765256	0.633416	1	13.414	12.958	12.095	13.314	8.795	5.678
56087	Dnah10	NM_019536	chr5	125205455	125314678	+	13957	1	Dnah10|Dnahc10|-|5|5 F|protein-coding	1.35648	0.170925	1	1.44804	0.350489	1	4.22433	1.47e-14	2.56e-13	1.21011	0.223575	1	1.26502	0.212158	1	0.008	0.009	0.003	0.009	0.011	0.078
68922	Dnaic1	NM_175138	chr4	41516827	41585191	+	2469	1	Dnaic1|1110066F04Rik|BB124644|Dnai1|b2b1526Clo|-|4|4 A5|protein-coding	2.4759	1	1	5.13e-15	1	1	7.83678	5.06e-14	8.48e-13	0	1	1	0	1	1	0	0	0	0.007	0	0.319
69387	Dnajb13	NM_153527	chr7	107651529	107663324	-	1133	1	Dnajb13|1700014P03Rik|Tsarg|-|7|7 E3|protein-coding	0.812077	0.00775599	0.219164	2.26163	2.68e-13	2.3e-11	1.75454	4.57e-12	6.48e-11	0.146311	0.622499	1	0.125145	0.725604	1	1.225	1.194	1.058	1.887	5.097	4.17
56323	Dnajb5	NM_019874	chr4	42965966	42971604	+	2304	1	Dnajb5|1110058L06Rik|AI462558|Hsc40|Hsp40-3|-|4|4 B1|protein-coding	0.204233	0.35126	1	1.70456	4.31e-10	2.34e-08	2.31482	3.9e-33	1.91e-31	0.155641	0.477925	1	-0.00414227	1	1	1.333	1.169	1.148	1.377	3.724	6.641
13418	Dnajc1	NM_007869	chr2	18135378	18314457	-	5481	1	Dnajc1|4733401K02Rik|AA960110|D230036H06Rik|Dnajl1|ERdj1|ERj1p|MTJ1|-|2|2 A2|protein-coding	0.136107	0.402075	1	1.00036	8.19e-05	0.00167862	1.8778	2.05e-27	7.66e-26	0.0269139	0.86813	1	0.0100917	0.950978	1	4.403	4.254	4.173	4.734	8.466	17.752
214063	Dnajc16	NM_172338	chr4	141317913	141346559	-	3896	1	Dnajc16|2900037O03Rik|4732437J24Rik|D030060M24|mKIAA0962|-|4|4 E1|protein-coding	-0.0551773	0.776058	1	0.275782	0.356347	1	1.12607	5.21e-10	5.92e-09	0.0935468	0.62126	1	0.00090436	1	1	3.21	3.011	2.917	2.895	3.668	7.335
78244	Dnajc21	NM_030046	chr15	10376518	10400271	-	2039	1	Dnajc21|4930461P20Rik|9930116P15Rik|-|15|15 A2|protein-coding	-0.166367	0.304631	1	-0.852396	0.000756003	0.0113979	-1.27942	6.66e-14	1.1e-12	0.158608	0.325619	1	0.145262	0.388383	1	38.997	38.717	33.671	31.047	18.575	16.014
105000	Dnal1	NM_028821	chr12	85455278	85484460	+	5748	1	Dnal1|1700010H15Rik|AW121714|Dnalc1|E330027P08Rik|-|12|12 D3|protein-coding	-0.103819	0.666068	1	0.633085	0.0263513	0.196609	1.293	2.04e-09	2.17e-08	0.211222	0.317785	1	0.138105	0.525815	1	0.739	0.696	0.618	0.589	0.949	1.744
75563	Dnali1	NM_175223	chr4	124732583	124742901	-	2078	1	Dnali1|1700023A09Rik|AW049135|-|4|4 D2.2|protein-coding	0.0895579	0.848449	1	0.621237	0.206906	0.794549	1.47022	1.38e-05	8.7e-05	-0.0241011	1	1	0.373418	0.404111	1	0.266	0.355	0.26	0.285	0.417	0.839
66705	Dnase1l2	NM_025718	chr17	24577713	24580046	-	1226	1	Dnase1l2|4733401H14Rik|-|17|17 A3.3|protein-coding	-0.0650985	0.895738	1	0.566626	0.277187	0.933667	1.1125	0.00424915	0.0163959	0.348771	0.458608	1	0.223744	0.734692	1	0.355	0.325	0.268	0.268	0.374	0.677
13421	Dnase1l3	NM_007870	chr14	8797704	8826696	-	3689	1	Dnase1l3|DNasegamma|Dhp2|Lsd|-|14|14 A1|protein-coding	-3.02699	0.543103	1	2.05327	0.18589	0.74536	3.83254	2.39e-06	1.69e-05	-3.22271	0.531898	1	0.515751	1	1	0	0.01	0.006	0	0.031	0.118
71972	Dnmbp	NM_028029	chr19	43921305	44014688	-	6095	1	Dnmbp|2410003L07Rik|2410003M15Rik|TUBA|-|19|19 D1|protein-coding	0.324819	0.0991318	1	0.445064	0.192932	0.762311	1.39801	3.65e-13	5.72e-12	-0.165315	0.416846	1	-0.0727196	0.727875	1	0.529	0.559	0.571	0.739	0.818	1.744
210293	Dock10	NM_175291	chr1	80497643	80755128	-	7250	1	Dock10|9330153B10Rik|A630054M16Rik|Jr4|Jr5|R75174|ZIZ3|Zizimin3|mKIAA0694|-|1|1 C4|protein-coding	1.01876	2.22e-10	5.81e-08	1.28769	8.94e-07	2.78e-05	2.12914	1.65e-34	8.57e-33	-0.576383	0.000435042	0.0759235	-0.827471	7.55e-07	0.000308999	2.491	2.066	3.581	7.505	8.932	18.093
238130	Dock4	NM_172803	chr12	41172640	41573075	+	8010	1	Dock4|5330406C03|6330411N01Rik|AF263288|C030023J22|mKIAA0716|-|12 B1|12 18.06 cM|protein-coding	-0.00593736	1	1	0.208867	0.565366	1	1.04105	0.000212148	0.0010695	0.031652	0.962367	1	0.117592	0.640688	1	0.176	0.181	0.166	0.172	0.193	0.397
68813	Dock5	NM_177780	chr14	68369985	68551629	-	10281	1	Dock5|1110060D06Rik|AI666732|AI956923|BC016533|E130320D18|lr2|rlc|-|14|14 D1|protein-coding	-0.156417	0.572302	1	-1.54921	2.72e-05	0.000623457	-1.68113	1.01e-07	8.77e-07	0.252485	0.30994	1	0.138051	0.586499	1	0.212	0.193	0.171	0.16	0.057	0.062
27261	Dok3	NM_013739	chr13	55624596	55629899	-	1539	1	Dok3|AI450713|Dokl|-|13|13 B1|protein-coding	0.533336	0.192575	1	0.2539	0.688536	1	1.35413	0.000100161	0.000536551	0.390177	0.320571	1	0.521098	0.35379	1	0.443	0.424	0.328	0.481	0.398	0.969
70028	Dopey2	NM_027293	chr16	93712152	93810833	+	7277	1	Dopey2|0610038M01Rik|2610510B01Rik|AI503246|C21orf5|mKIAA0933|-|16|16 C4|protein-coding	0.000632023	1	1	0.445182	0.174799	0.721821	1.63823	2.41e-13	3.83e-12	0.406045	0.0891182	1	0.302114	0.195922	1	0.577	0.533	0.423	0.438	0.583	1.515
70127	Dpf3	NM_001267626	chr12	84369998	84828686	-	1505	1	Dpf3|2810403B03Rik|6530402L11Rik|BAF45C|C78788|CERD4|cer-d4|-|12|12 D3|protein-coding	0.75059	0.00335078	0.113648	2.30101	4.23e-13	3.5e-11	3.9134	5.17e-76	9.28e-74	-0.314522	0.260308	1	-0.0420822	0.921047	1	0.758	0.899	0.906	1.595	4.574	15.894
69740	Dph5	NM_027193	chr3	115591101	115632241	+	1557	1	Dph5|2410012M04Rik|AU045680|C80186|-|3|3 G1|protein-coding	0.0258042	0.877082	1	-0.587871	0.0206746	0.165479	-1.22228	1.64e-12	2.45e-11	-0.061343	0.708266	1	0.0381681	0.822321	1	16.844	17.884	16.759	17.784	10.636	8.4
83768	Dpp7	NM_031843	chr2	25207810	25211852	-	1640	1	Dpp7|DPPII|Dpp2|QPP|-|2|2 A3|protein-coding	-0.211002	0.843046	1	-0.344103	0.722331	1	1.38826	0.00864686	0.0311694	0.303197	0.63086	1	0.188313	1	1	0.129	0.118	0.1	0.09	0.078	0.309
66310	Dpy30	NM_001146222	chr17	74698814	74715734	-	783	1	Dpy30|2810410M20Rik|C87842|-|17|17 E2|protein-coding	-0.308566	0.0907296	1	0.104318	0.749502	1	-1.01722	7.23e-08	6.39e-07	-0.227689	0.204224	1	-0.259848	0.155031	1	64.908	62.134	71.654	60.818	68.825	41.179
12934	Dpysl2	NM_009955	chr14	67421701	67487437	-	4416	1	Dpysl2|AI851130|Crmp2|DRP2|Musunc33|TOAD-64|Ulip2|-|14 D1|14 34.6 cM|protein-coding	-0.0151642	0.935645	1	-0.0196811	0.93933	1	-1.14682	1.96e-09	2.09e-08	0.0797534	0.644937	1	0.0705607	0.688709	1	7.071	6.82	6.497	6.62	6.391	3.369
13492	Drd5	NM_013503	chr5	38710748	38713762	+	3012	1	Drd5|D5R|Drd-5|Drd1b|Gpcr1|-|5 B3|5 20.4 cM|protein-coding	0.48899	0.303652	1	-0.952286	0.166203	0.703767	-1.7082	0.00918131	0.0328987	-1.45146	0.0176281	0.959055	-1.95796	0.00370115	0.282545	0.035	0.024	0.094	0.136	0.047	0.033
13505	Dsc1	NM_013504	chr18	20241973	20273274	-	4987	1	Dsc1|1110020A10Rik|AI507491|Dsc1a|Dsc1b|-|18|18 A2|protein-coding	-0.0823518	0.792566	1	-0.770842	0.0411137	0.273069	-1.14146	0.000995252	0.00439296	-2.46292	1.52e-10	1.46e-07	-1.97381	1.26e-07	6.43e-05	0.04	0.056	0.212	0.213	0.126	0.114
13506	Dsc2	NM_013505	chr18	20189299	20218006	-	4397	1	Dsc2|AW228162|Dsc2a|Dsc2b|-|18 A2|18 11.14 cM|protein-coding	-0.345274	0.0335546	0.60441	-1.54102	4.91e-09	2.3e-07	-2.44141	8.36e-35	4.4e-33	-0.0493761	0.764231	1	0.0162072	0.927152	1	59.197	62.585	58.944	47.934	20.13	12.524
13507	Dsc3	NM_001291809	chr18	20119431	20160598	-	5329	1	Dsc3|5430426I24Rik|-|18 A2|18 11.11 cM|protein-coding	-0.553861	0.197065	1	-2.52658	1.79e-05	0.000426308	-3.4781	4.23e-10	4.85e-09	-0.534622	0.143273	1	-0.090273	0.817919	1	0.096	0.126	0.133	0.093	0.022	0.013
13510	Dsg1a	NM_010079	chr18	20469374	20501854	+	5610	1	Dsg1a|BB010119|Dsg1|-|18 A2|18 11.29 cM|protein-coding	-0.150886	0.68046	1	-1.45299	0.00274799	0.0333747	-2.57014	1.08e-07	9.32e-07	0.209633	0.58893	1	0.256413	0.498782	1	0.157	0.161	0.13	0.123	0.048	0.025
225256	Dsg1b	NM_181682	chr18	20535336	20568242	+	3387	1	Dsg1b|Dsg5|-|18 A2|18 11.32 cM|protein-coding	-0.0891324	0.803899	1	-2.5184	6.78e-06	0.000175962	-3.38805	2.53e-09	2.65e-08	0.394245	0.267934	1	0.253462	0.466743	1	0.267	0.239	0.194	0.194	0.034	0.021
211924	Dsg1c	NM_181680	chr18	20405841	20442424	+	2963	1	Dsg1c|9330156N18|Dsg1gamma|Dsg6|dsg1g|-|18 A2|18 11.26 cM|protein-coding	-0.142842	0.576512	1	-2.23579	1.24e-08	5.38e-07	-4.0637	1.32e-24	4.38e-23	0.186897	0.437345	1	0.21296	0.362804	1	0.83	0.832	0.702	0.666	0.142	0.047
13512	Dsg3	NM_030596	chr18	20668805	20699811	+	4090	1	Dsg3|bal|balding|-|18 A2|18 11.39 cM|protein-coding	3.18627	3.36e-05	0.00253114	6.52228	4.61e-25	1.12e-22	5.37882	2.28e-19	5.54e-18	0.636129	0.746355	1	-3.70848	0.282934	1	0.014	0	0.009	0.088	0.913	0.454
109620	Dsp	NM_023842	chr13	38243163	38290446	+	9566	1	Dsp|2300002E22Rik|5730453H04Rik|AA407887|AA407888|AW109828|DP|rul|-|13|13 A3.3|protein-coding	3.08899	0.000100859	0.00653735	5.065	2.7e-12	1.99e-10	5.06405	3.09e-19	7.48e-18	-3.76216	0.294796	1	-1.35704	0.664479	1	0	0.001	0.004	0.036	0.143	0.156
66044	Dtd1	NM_025314	chr2	144425689	144594483	+	1275	1	Dtd1|0610006H08Rik|DUE-B|Hars2|-|2|2 H1|protein-coding	-0.142391	0.380223	1	-0.455649	0.0741942	0.411189	-1.77951	6.52e-24	2.07e-22	-0.187449	0.23871	1	-0.157547	0.336529	1	25.738	26.093	27.952	26.464	19.397	9.518
76843	Dtl	NM_029766	chr1	193361235	193399423	-	4204	1	Dtl|2810047L02Rik|5730564G15Rik|Ramp|-|1|1 H6|protein-coding	0.0726923	0.661876	1	-0.411571	0.125197	0.57874	-1.1176	2.21e-11	2.94e-10	0.111731	0.489991	1	0.0250424	0.881197	1	44.957	42.062	40.172	43.756	30.66	21.372
69185	Dtwd1	NM_026981	chr2	125977877	125991013	+	1336	1	Dtwd1|1810033A06Rik|-|2|2 F2|protein-coding	-0.129322	0.564931	1	-0.637911	0.028094	0.206725	-1.18556	9.65e-08	8.38e-07	-0.277457	0.170717	1	-0.226816	0.274166	1	7.398	7.469	8.499	7.988	5.258	4.4
14357	Dtx1	NM_008052	chr5	121130273	121161678	-	3703	1	Dtx1|Fxit1|mKIAA4160|-|5 F|5 60.64 cM|protein-coding	-0.401298	0.0136991	0.335089	-1.83696	5.08e-12	3.63e-10	-2.35941	2.17e-27	8.1e-26	-0.249702	0.114317	1	-0.240479	0.133101	1	122.767	121.715	140.586	111.083	38.967	31.634
207521	Dtx4	NM_172442	chr19	12540826	12576486	-	5759	1	Dtx4|AI449438|BC044798|D930042H13|RNF155|-|19|19 A|protein-coding	0.163151	0.31336	1	-1.46722	1.08e-08	4.74e-07	-1.80261	6.16e-20	1.57e-18	-0.121793	0.45506	1	-0.155011	0.350078	1	3.655	3.537	3.839	4.451	1.386	1.27
71916	Dus4l	NM_028002	chr12	32324920	32339691	-	1759	1	Dus4l|2310069P03Rik|2700089B10Rik|AI482040|Pp35|-|12|12 A3|protein-coding	-0.315618	0.0593006	0.847298	-0.939546	0.000221863	0.00402349	-1.23273	7.85e-12	1.09e-10	-0.266078	0.114757	1	-0.201531	0.237739	1	6.796	6.998	7.812	6.544	3.986	3.877
19252	Dusp1	NM_013642	chr17	26642536	26645417	-	1936	1	Dusp1|3CH134|MKP1|Ptpn16|U19515|erp|mkp-1|-|17 13.28 cM|17 A2-C|protein-coding	1.84344	7.72e-15	4.12e-12	2.12263	4.49e-12	3.24e-10	3.4094	1.78e-51	1.69e-49	-0.756131	0.00709217	0.57812	-0.867436	0.00177716	0.171628	0.839	0.774	1.342	4.977	5.722	16.75
63953	Dusp10	NM_022019	chr1	185858340	185899515	+	2706	1	Dusp10|2610306G15Rik|AI158871|MKP-5|MKP5|-|1|1 H5|protein-coding	-1.46958	4.74e-20	4.75e-17	-2.69541	7.36e-24	1.65e-21	-2.79697	7.26e-56	7.76e-54	-0.391445	0.00958149	0.683697	-0.621285	7.29e-05	0.0140281	11.657	9.884	14.69	5.536	2.308	2.453
56405	Dusp14	NM_019819	chr11	83861547	83881859	-	1438	1	Dusp14|1110014C10Rik|2310042C07Rik|D11Ertd395e|MKP-L|Mkp6|-|11 C|11 51.29 cM|protein-coding	-0.277695	0.20566	1	-0.635475	0.0353321	0.243936	-1.31964	1.97e-07	1.64e-06	-0.19836	0.362082	1	-0.00877584	1	1	1.759	1.974	1.937	1.658	1.223	0.9
70686	Dusp16	NM_130447	chr6	134665486	134742646	-	5103	1	Dusp16|3830417M17Rik|AW558566|D6Ertd213e|MKP-7|MKP7|Mkpm|-|6 G1|6 65.77 cM|protein-coding	0.072124	0.725136	1	1.27364	2.52e-05	0.000582064	2.25239	2.37e-29	9.69e-28	0.287941	0.152962	1	0.370867	0.0667923	1	1.277	1.326	1.011	1.086	2.516	5.567
13537	Dusp2	NM_010090	chr2	127161895	127164113	+	1612	1	Dusp2|PAC1|-|2|2 F1|protein-coding	0.572434	0.00154647	0.0620834	0.373357	0.192796	0.762046	1.02177	2.02e-08	1.91e-07	-0.0798721	0.66763	1	0.0477699	0.812887	1	4.92	5.253	4.958	7.65	6.042	11.777
105352	Dusp22	NM_001037955	chr13	30751928	30803101	+	3049	1	Dusp22|JKAP|JSP1|LMW-DSP2|MKPX|-|13|13 A3.2|protein-coding	-0.537551	0.0372079	0.650853	0.667496	0.0315191	0.224754	1.21313	2.65e-07	2.17e-06	-0.282744	0.257475	1	-0.326687	0.200061	1	1.81	1.748	2.142	1.551	3.385	5.46
240892	Dusp27	NM_001160049	chr1	168028279	168058029	-	4013	1	Dusp27|C130085G02Rik|Gm209|-|1|1 H2.3|protein-coding	0.536019	0.16076	1	1.00682	0.0288202	0.211164	1.26016	0.000423754	0.00200749	-0.409427	0.328493	1	-0.543021	0.202592	1	0.094	0.084	0.12	0.18	0.251	0.336
240672	Dusp5	NM_001085390	chr19	53603808	53615812	+	1150	1	Dusp5|Gm337|-|19|19 D2|protein-coding	2.05155	1.32e-18	1.09e-15	1.49201	3.05e-06	8.51e-05	2.77047	5.84e-35	3.12e-33	-0.460877	0.169784	1	-0.975751	0.00345375	0.272784	0.757	0.515	1.002	4.289	2.727	7.973
67603	Dusp6	NM_026268	chr10	98725865	98730123	+	2792	1	Dusp6|1300019I03Rik|MKP-3|MKP3|PYST1|-|10|10 C3|protein-coding	0.535032	0.0120528	0.30541	0.33326	0.324986	1	1.08189	2.34e-07	1.93e-06	-0.0293432	0.902472	1	-0.254134	0.2886	1	0.923	0.796	0.901	1.36	1.183	2.226
235584	Dusp7	NM_153459	chr9	106270963	106278054	+	3207	1	Dusp7|AU015694|Mkpx|Pyst2|-|9|9 F1|protein-coding	-0.297706	0.0688775	0.920466	-1.09683	9.94e-06	0.000250344	-1.07332	8.28e-10	9.2e-09	0.0868531	0.588714	1	-0.0224121	0.896785	1	7.349	6.648	6.616	5.584	3.065	3.666
110074	Dut	NM_023595	chr2	125073251	125084785	+	2350	1	Dut|5031412I06Rik|5133400F09Rik|D2Bwg0749e|Dutp|dUTPase|-|2 F1|2 61.33 cM|protein-coding	-0.0941261	0.600282	1	-0.226412	0.448976	1	-1.81435	1.79e-22	5.29e-21	-0.165678	0.351536	1	-0.0661651	0.715069	1	83.815	89.146	89.166	87.617	70.738	29.783
574405	DXBay18	NM_001025384	chrX	70382571	70394789	-	2855	2	DXBay18|-|-|X|X A7.3|protein-coding	-0.019826	1	1	-1.2367	0.00840354	0.0828536	-1.77055	3.66e-07	2.93e-06	0.0685924	0.823954	1	0.191564	0.498759	1	0.668	0.711	0.618	0.628	0.277	0.207
112403	Dxo	NM_033613	chr17	34973964	34976131	+	1463	1	Dxo|Dom3z|NG6|-|17|17 B1|protein-coding	0.523823	0.00167686	0.0658881	0.612075	0.0130375	0.116199	1.09595	3.21e-10	3.72e-09	-0.0595818	0.734004	1	-0.0829659	0.638187	1	8.388	8.108	8.436	12.543	12.495	20.839
213575	Dync2li1	NM_172256	chr17	85025839	85054904	+	1312	1	Dync2li1|4933404O11Rik|CGI-60|D2lic|LIC3|mD2LIC|-|17|17 E4|protein-coding	2.55897	1	1	4.31496	0.12095	0.567294	7.239	8.15e-10	9.07e-09	3.1449	0.522401	1	2.27964	1	1	0.018	0.009	0	0.013	0.039	0.397
69181	Dyrk2	NM_001014390	chr10	118296405	118305959	-	2132	1	Dyrk2|1810038L18Rik|-|10|10 D2|protein-coding	0.715918	2.46e-05	0.00193852	1.54918	6.43e-10	3.42e-08	2.81186	8.99e-56	9.57e-54	0.103811	0.551591	1	0.097264	0.612026	1	8.659	8.21	7.801	13.212	22.542	63.176
226419	Dyrk3	NM_145508	chr1	133025018	133034811	-	2067	1	Dyrk3|BC006704|-|1|1 E4|protein-coding	-0.609507	0.00126395	0.0524945	-0.951285	0.000274814	0.00483428	-1.15528	7.64e-08	6.73e-07	-0.122728	0.485535	1	-0.00997697	0.955641	1	4.924	5.248	5.124	3.548	2.615	2.681
101320	Dyrk4	NM_207210	chr6	126826217	126871857	-	2056	1	Dyrk4|AW049118|Dyrk4a|Dyrk4b|-|6|6 F3|protein-coding	2.79305	4.22e-08	6.91e-06	8.57338	3.38e-86	8.12e-82	9.61103	9.97e-210	1.04e-206	-0.614994	0.633013	1	-1.45337	0.314844	1	0.034	0.018	0.051	0.376	20.747	48.111
26903	Dysf	NM_001077694	chr6	83958592	84161053	+	6788	1	Dysf|2310004N10Rik|AI604795|D6Pas3|-|6 C3|6 36.14 cM|protein-coding	0.374747	1	1	2.56221	0.0304135	0.219419	3.05286	0.00126449	0.00546597	-3.22211	0.531038	1	-3.20186	0.542785	1	0	0	0.004	0.005	0.023	0.038
338535	E030013I19Rik	NR_040353	chr2	12222873	12233942	+	2771	1	E030013I19Rik|-|-|-|ncRNA	5.13e-15	1	1	5.13e-15	1	1	8.29002	7.42e-18	1.63e-16	0	1	1	0	1	1	0	0	0	0	0	0.391
78668	E130112N10Rik	NR_015604	chr6	125181294	125189952	+	1349	1	E130112N10Rik|5830448L21Rik|9530059J11Rik|-|6|6 F2|ncRNA	-0.1089	1	1	0.720991	0.239792	0.857824	2.10968	9.36e-07	7.07e-06	0.0680872	1	1	0.0947	0.913807	1	0.253	0.251	0.235	0.219	0.397	1.168
77490	E130218I03Rik	NR_040435	chr4	133799678	133801788	+	998	1	E130218I03Rik|E130106C14Rik|-|4|4 D3|ncRNA	-0.114883	0.536664	1	-0.429336	0.174641	0.721703	-1.00877	4.48e-07	3.53e-06	-0.275227	0.138913	1	-0.0584298	0.757971	1	13.322	15.227	15.323	14.894	10.423	8.948
327744	E130307A14Rik	NR_038037	chr10	39341217	39451813	-	1661	1	E130307A14Rik|-|-|10|10 B1|ncRNA	0.261633	0.241455	1	0.59486	0.0522029	0.32337	1.15745	3.3e-08	3.04e-07	0.0983629	0.665754	1	0.0307086	0.921269	1	2.083	1.942	1.854	2.326	2.679	4.843
320172	E230016M11Rik	NR_040278	chr6	66986593	67030646	+	1755	1	E230016M11Rik|-|-|6|6 C1|ncRNA	0.875357	1.24e-05	0.00107881	1.41029	3.52e-07	1.19e-05	2.06548	6.15e-24	1.96e-22	-0.238852	0.27315	1	-0.235835	0.304937	1	1.576	1.542	1.775	3.392	4.685	8.678
13559	E2f5	NM_007892	chr3	14578671	14606309	+	1739	1	E2f5|AU024671|E2F-5|-|3|3 A1|protein-coding	0.342599	0.0667032	0.906733	1.3105	7.02e-07	2.23e-05	1.25526	2.1e-12	3.11e-11	0.0578642	0.74584	1	0.162085	0.367256	1	5.244	5.536	4.819	6.26	11.363	13.44
50498	Ebi3	NM_015766	chr17	56092046	56096445	+	1164	1	Ebi3|EBI-3|IL-27|-|17 D|17 29.08 cM|protein-coding	0.0271958	1	1	1.29261	0.12087	0.567294	3.64268	2.14e-20	5.6e-19	-1.29054	0.182356	1	-0.979547	0.283088	1	0.051	0.062	0.121	0.127	0.34	1.8
69072	Ebna1bp2	NM_026932	chr4	118293404	118300381	+	2949	1	Ebna1bp2|1810014B19Rik|AA537058|B830003A16Rik|C81321|Ebp2|Nobp|p40|-|4|4 D2.1|protein-coding	-0.0423804	0.798341	1	-0.542015	0.0378812	0.257397	-1.07019	1.42e-10	1.72e-09	-0.0414306	0.799569	1	0.0160952	0.924861	1	52.973	54.817	51.967	52.887	34.669	28.946
93747	Echs1	NM_053119	chr7	147291622	147302322	-	1481	1	Echs1|C80529|-|7|7 F4|protein-coding	-0.253494	0.147396	1	-0.392826	0.157283	0.679025	-1.12149	3.28e-10	3.8e-09	-0.114036	0.505965	1	-0.0828355	0.636206	1	48.232	48.467	49.58	43.534	35.645	26.748
13608	Edar	NM_010100	chr10	58063536	58138444	-	3666	1	Edar|ED1R|ED3|ED5|EDA-A1R|EDA3|dl|-|10 29.37 cM|10 B3|protein-coding	5.13e-15	1	1	5.84341	0.000719477	0.0109458	9.56179	3.54e-38	2.14e-36	3.67633	0.27761	1	0	1	1	0.01	0	0	0	0.045	0.713
216238	Eea1	NM_001001932	chr10	95403297	95508152	+	7805	1	Eea1|A430109M19Rik|B230358H09Rik|ZFYVE2|-|10|10 C3|protein-coding	0.322729	0.055201	0.808278	0.966647	0.000501497	0.00808819	1.90565	6.31e-27	2.29e-25	0.0945419	0.561908	1	0.0573678	0.733377	1	5.606	5.411	5.083	6.573	10.207	21.963
66143	Eef1e1	NM_025380	chr13	38737560	38750897	-	1033	1	Eef1e1|1110003A02Rik|-|13|13 A5|protein-coding	-0.397752	0.0294444	0.560577	-0.757089	0.00882952	0.0862753	-1.38794	7.2e-14	1.19e-12	-0.231762	0.198488	1	-0.207126	0.256192	1	81.019	80.912	90.141	71.63	50.042	40.527
13631	Eef2k	NM_007908	chr7	127986345	128050733	+	6329	1	Eef2k|C86191|eEF-2K|-|7|7 F3|protein-coding	-0.0312834	0.854629	1	-1.37159	2.71e-07	9.3e-06	-1.51757	1.84e-17	3.97e-16	-0.0623131	0.701687	1	-0.163809	0.323318	1	11.814	10.895	11.931	12.148	4.673	4.799
230500	Efcab7	NM_145549	chr4	99496191	99585388	+	1805	1	Efcab7|mKIAA1799|-|4|4 C6|protein-coding	-0.17121	0.351469	1	0.0150171	0.954328	1	-1.02547	4.59e-08	4.15e-07	-0.321026	0.0866022	1	-0.152102	0.407551	1	4.081	4.578	4.871	4.464	4.831	2.789
13637	Efna2	NM_007909	chr10	79642227	79652755	+	2125	1	Efna2|CEK7L|Elf1|Epl6|Eplg6|Lerk6|-|10 C1|10 39.72 cM|protein-coding	1.61666	0.0677503	0.913379	-0.0234855	1	1	2.17794	0.00337219	0.0133198	1.15899	0.175961	1	2.0511	0.00489536	0.340152	0.066	0.119	0.028	0.093	0.03	0.152
13641	Efnb1	NM_010110	chrX	96331400	96344361	+	3351	1	Efnb1|Cek5-L|EFL-3|Elk-L|Epl2|Eplg2|LERK-2|Lerk2|Stra1|-|X 43.22 cM|X D|protein-coding	0.408084	1	1	-0.479072	1	1	3.69752	6.75e-07	5.21e-06	-1.43699	0.646074	1	-3.7083	0.282264	1	0.004	0	0.011	0.015	0.008	0.172
668212	Efr3b	NM_001082483	chr12	3962554	4038915	-	6522	1	Efr3b|AI852640|C030014M07Rik|mKIAA0953|-|12|12 A1.1|protein-coding	-0.0585847	0.753753	1	-1.46061	5.5e-08	2.14e-06	-1.77243	2.76e-18	6.3e-17	0.142306	0.419435	1	0.14691	0.413943	1	2.737	2.701	2.401	2.398	0.862	0.809
75740	Egfem1	NM_029412	chr3	28981499	29589978	+	2673	1	Egfem1|6130401L20Rik|Efcab11|-|3|3 A3|protein-coding	-0.455134	0.0388085	0.666534	-3.26696	3.74e-11	2.38e-09	-5.05294	9.06e-39	5.64e-37	-0.260834	0.229389	1	-0.0214466	0.914325	1	1.078	1.297	1.236	0.935	0.114	0.042
81701	Egfl8	NM_152922	chr17	34750295	34752916	-	1143	1	Egfl8|Ng3|-|17 B1|17 18.19 cM|protein-coding	0.651875	0.179155	1	1.02867	0.0252015	0.189769	1.10218	0.00373401	0.0146074	0.378387	0.422516	1	0.632038	0.116989	1	0.432	0.507	0.319	0.532	0.647	0.8
112407	Egln3	NM_028133	chr12	55279968	55304861	-	2669	1	Egln3|2610021G09Rik|AI505553|AI648162|Hif-p4h-3|Phd3|SM-20|-|12|12 C1|protein-coding	2.29886	1.97e-42	1.58e-38	3.46389	2.48e-34	1.13e-31	4.10526	1.39e-113	4.85e-111	-0.0653648	0.672344	1	-0.0910621	0.572149	1	18.511	17.652	18.589	94.352	203.782	372.447
13653	Egr1	NM_007913	chr18	35020861	35024610	+	3068	1	Egr1|A530045N19Rik|ETR103|Egr-1|Krox-1|Krox-24|Krox24|NGF1-A|NGFI-A|NGFIA|TIS8|Zenk|Zfp-6|Zif268|egr|-|18 18.76 cM|18 C/D|protein-coding	-0.06661	0.837751	1	0.472526	0.155548	0.673957	1.48294	4.41e-10	5.04e-09	-0.0979881	0.774531	1	0.0656438	0.806847	1	0.41	0.449	0.421	0.429	0.565	1.375
13654	Egr2	NM_010118	chr10	67000617	67004936	+	2961	1	Egr2|Egr-2|Krox-20|Krox20|NGF1-B|Zfp-25|Zfp-6|-|10 34.96 cM|10 B5|protein-coding	1.67763	0.341571	1	2.21588	0.109755	0.532113	2.7077	0.00869089	0.031314	-0.0284796	1	1	-0.0249614	1	1	0.008	0.008	0.008	0.028	0.039	0.066
114601	Ehbp1l1	NM_001114597	chr19	5707374	5726317	-	6385	1	Ehbp1l1|G430002G23Rik|-|19|19 A|protein-coding	-0.183981	0.315518	1	0.204883	0.480168	1	1.25872	1.35e-11	1.83e-10	0.152268	0.391281	1	0.267188	0.142756	1	1.686	1.768	1.493	1.323	1.819	4.017
13664	Eif1a	NM_010120	chr18	46757358	46769879	+	2874	1	Eif1a|C76390|Ef1a|Eftu|Eif4c|eIF-1A|eIF-4C|-|18|18 C|protein-coding	-0.370923	0.0230164	0.473259	-0.803087	0.00183361	0.0240419	-1.13897	5.56e-12	7.83e-11	-0.0209146	0.898938	1	-0.0461648	0.7824	1	47.818	46.913	46.276	37.217	25.882	24.558
66235	Eif1ax	NM_025437	chrX	155810127	155823631	+	917	1	Eif1ax|1500010B24Rik|AI426898|Eif1ay|-|X|X F4|protein-coding	-0.37222	0.0665579	0.905782	-0.228707	0.495422	1	-1.44462	2.96e-12	4.29e-11	-0.313043	0.120897	1	-0.24528	0.229744	1	163.314	169.583	191.283	155.483	148.431	83.088
108067	Eif2b3	NM_001111277	chr4	116692013	116759457	+	1535	1	Eif2b3|1190002P15Rik|-|4|4 D1|protein-coding	-0.176215	0.273827	1	-0.797272	0.00138537	0.0190148	-1.29504	6.38e-16	1.23e-14	-0.120732	0.441136	1	-0.0946746	0.555498	1	32.776	33.022	34.052	31.236	18.827	16.197
67204	Eif2s2	NM_026030	chr2	154697146	154718642	-	2502	1	Eif2s2|2810026E11Rik|38kDa|AA408636|AA571381|AA986487|AW822225|D2Ertd303e|EIF2|EIF2B|-|2 H1|2 76.89 cM|protein-coding	-0.208011	0.23869	1	-0.236975	0.401472	1	-1.03221	5.93e-09	5.96e-08	-0.155714	0.362395	1	-0.184211	0.289201	1	105.015	101.851	111.194	99.723	88.956	63.844
13685	Eif4ebp1	NM_007918	chr8	28370799	28386128	+	976	1	Eif4ebp1|4e-bp1|AA959816|PHAS-I|-|8 15.95 cM|8 A4-B1|protein-coding	-0.144139	0.419719	1	-0.562571	0.0401496	0.267816	-1.04767	5.58e-09	5.63e-08	-0.318617	0.0690108	1	-0.251815	0.157328	1	93.779	96.332	110.989	104.943	71.93	63.124
13690	Eif4g2	NM_013507	chr7	118211499	118226544	-	7736	1	Eif4g2|AA589388|DAP-5|E130105L11Rik|Nat1|Natm1|p97|-|7 F1|7 58.0 cM|protein-coding	0.176728	0.273268	1	0.97366	0.000277183	0.00486882	1.03724	1.71e-10	2.05e-09	0.0895241	0.57433	1	0.0871381	0.600181	1	151.789	151.536	137.287	160.683	272.857	326.541
276770	Eif5a	NM_001166589	chr11	69730214	69734888	-	1436	1	Eif5a|AA410058|D19Wsu54e|Eif4d|Eif5a1|eIF-4D|eIF-5A|eIF-5A-1|eIF-5A1|-|11|11 B3|protein-coding	-0.170458	0.366196	1	-0.528676	0.0828679	0.445003	-1.13544	1.84e-09	1.96e-08	-0.217704	0.237438	1	-0.220464	0.24157	1	1317.44	1276.87	1450.74	1341.34	940.042	789.651
15571	Elavl3	NM_010487	chr9	21819449	21856467	-	5018	1	Elavl3|2600009P04Rik|Huc|PLE21|mHuC|-|9 A3|9 8.07 cM|protein-coding	0.726374	0.247258	1	-0.196734	0.768414	1	1.21996	0.013325	0.0459789	0.0933865	1	1	-0.167464	0.876059	1	0.045	0.036	0.04	0.069	0.036	0.109
15572	Elavl4	NM_010488	chr4	109876342	109959439	-	4085	1	Elavl4|Elav|Hud|PNEM|-|4 C7|4 51.42 cM|protein-coding	-0.806204	3.09e-06	0.000314752	-1.77286	3.08e-11	1.98e-09	-2.34971	3.52e-34	1.81e-32	0.371401	0.0216549	1	0.192765	0.256794	1	6.088	5.212	4.555	2.741	1.361	1.052
207393	Elfn2	NM_183141	chr15	78500437	78548543	-	4857	1	Elfn2|6330514E13|AW048948|BC094219|Lrrc62|Ppp1r29|-|15|15 E1|protein-coding	-1.04444	3.07e-06	0.000314504	-3.4944	1.88e-31	7.06e-29	-3.32135	4.58e-43	3.28e-41	0.345946	0.0660541	1	0.258662	0.175922	1	10.717	9.974	8.216	4.198	0.701	0.938
13712	Elk1	NM_007922	chrX	20510521	20527734	-	3540	1	Elk1|Elk-1|-|X 16.45 cM|X A1-A3|protein-coding	0.171532	0.292161	1	0.503165	0.037619	0.25605	1.07413	1.26e-10	1.54e-09	0.207508	0.198224	1	0.0278648	0.867574	1	5.464	4.689	4.559	5.305	6.421	11.107
140580	Elmo1	NM_080288	chr13	20182376	20700222	+	5552	1	Elmo1|6330578D22Rik|C230095H21Rik|CED-12|-|13|13 A3.1|protein-coding	0.0924676	0.594001	1	-0.705649	0.00780099	0.0780651	-1.15614	3.39e-12	4.88e-11	0.0149699	0.926287	1	-0.071172	0.668556	1	8.494	7.97	8.134	9.057	5.123	4.21
140579	Elmo2	NM_080287	chr2	165113531	165151979	-	4567	1	Elmo2|1190002F24Rik|CED-12|-|2|2 H3|protein-coding	0.466816	0.00497781	0.154056	1.02377	0.000119494	0.00236057	1.48442	5.2e-18	1.16e-16	0.0928439	0.566419	1	0.123153	0.458731	1	8.935	9.022	8.11	11.529	16.675	26.155
13717	Eln	NM_007925	chr5	135178465	135223193	-	3812	1	Eln|AI385707|AI480567|E030024M20Rik|-|5 G2|5 74.76 cM|protein-coding	5.13e-15	1	1	5.13e-15	1	1	6.78961	1.8e-07	1.51e-06	0	1	1	0	1	1	0	0	0	0	0	0.1
68801	Elovl5	NM_134255	chr9	77765172	77832326	+	2771	1	Elovl5|1110059L23Rik|AI747313|AU043003|HELO1|-|9|9 E1|protein-coding	-0.330545	0.0394582	0.672925	-0.678394	0.00917623	0.0890121	-1.06383	3.88e-11	4.99e-10	-0.0383468	0.80678	1	-0.152472	0.342117	1	45.863	41.943	45.345	37.271	28.629	25.136
72341	Elp6	NM_001081381	chr9	110207696	110224606	+	2055	1	Elp6|2610001P13Rik|2610002I17Rik|AV159994|Tmem103|-|9|9 F2|protein-coding	0.674348	2.48e-05	0.00194839	1.63702	3.28e-11	2.1e-09	2.23118	1.49e-41	1.01e-39	-0.0371507	0.821499	1	0.0213769	0.913323	1	8.125	8.453	7.979	13.234	24.069	43.693
14791	Emg1	NM_013536	chr6	124654388	124662196	-	1037	1	Emg1|C2f|Grcc2f|-|6 F2|6 59.17 cM|protein-coding	-0.160875	0.445069	1	-0.0625495	0.858608	1	-1.06537	5.78e-07	4.5e-06	-0.308191	0.138083	1	-0.235194	0.266738	1	112.975	115.862	131.789	124.013	113.712	74.599
68519	Eml1	NM_001043335	chr12	109661026	109777774	+	4136	1	Eml1|1110008N23Rik|A930030P13Rik|AA171013|AI847476|AI853955|ELP79|EMAP|EMAPL|heco|-|12 F1|12 59.46 cM|protein-coding	3.73356	1.12e-06	0.000129261	7.96232	2.13e-50	2.33e-47	10.1081	7.58e-174	5.52e-171	0.633116	0.74294	1	-1.35051	0.650082	1	0.016	0.003	0.009	0.136	2.605	12.999
13799	En2	NM_010134	chr5	28492236	28498706	+	3533	1	En2|BB131122|En-2|-|5 B1|5 13.94 cM|protein-coding	5.13e-15	1	1	5.13e-15	1	1	5.51492	0.00240101	0.00976445	0	1	1	0	1	1	0	0	0	0	0	0.044
13804	Endog	NM_007931	chr2	30027044	30029589	+	1027	1	Endog|-|-|2|2 B|protein-coding	-0.225685	0.245584	1	-0.555487	0.066318	0.38079	-1.37382	9.06e-11	1.12e-09	-0.17731	0.356841	1	-0.125929	0.52081	1	25.64	25.948	27.434	24.641	17.316	12.474
19011	Endou	NM_001168693	chr15	97541450	97561836	-	2393	1	Endou|Pp11r|Tcl-30|-|15 F1|15 53.7 cM|protein-coding	-0.141799	0.377166	1	-2.27478	2.18e-17	2.84e-15	-3.77032	3.76e-65	5.23e-63	0.179164	0.259403	1	0.098589	0.576263	1	9.642	9.167	8.164	7.662	1.699	0.693
338371	Endov	NM_001164636	chr11	119352661	119372779	+	5101	1	Endov|A730011L01Rik|-|11|11 E2|protein-coding	0.315792	0.0777406	0.979536	0.61071	0.0167822	0.14096	1.05095	2.44e-09	2.57e-08	0.0467735	0.794591	1	0.127952	0.484187	1	3.038	3.133	2.848	3.659	4.336	6.798
69638	Enho	NM_027147	chr4	41585177	41587335	-	1243	1	Enho|1110065P19Rik|2310040A07Rik|-|4|4 A5|protein-coding	5.13e-15	1	1	4.67097	0.0833385	0.446304	6.35912	1.21e-05	7.64e-05	0	1	1	0	1	1	0	0	0	0	0.051	0.226
13806	Eno1	NM_023119	chr4	149611306	149622982	+	1762	1	Eno1|0610008I15|AL022784|Eno-1|MBP-1|-|4 E2|4 81.24 cM|protein-coding	-0.177952	0.278053	1	-0.933151	0.000417604	0.00686521	-2.06628	3.41e-33	1.69e-31	0.0279642	0.859865	1	0.12776	0.423032	1	766.819	805.476	722.382	668.94	381.855	199.878
433182	Eno1b	NM_001025388	chr4	149611433	149622982	+	1696.5	2	Eno1b|EG433182|Eno1|Gm5506|-|18 C|18|protein-coding	-0.173528	0.290993	1	-0.927726	0.000467919	0.00761302	-2.06724	4.94e-33	2.41e-31	0.0273367	0.863113	1	0.138895	0.383765	1	1519.77	1609.41	1432.31	1331.12	760.607	396.018
67870	Enoph1	NM_026421	chr5	100469013	100497784	+	1821	1	Enoph1|2310057D15Rik|BB183658|C81437|-|5|5 E4|protein-coding	-0.0279806	0.866407	1	-0.32059	0.191999	0.760753	-1.18225	2.99e-12	4.34e-11	-0.033575	0.834474	1	0.000518956	1	1	20.033	20.807	19.347	20.156	15.339	10.063
209224	Enox2	NM_001271447	chrX	46362884	46641419	-	3959	1	Enox2|APK1|Cova1|tNOX|-|X|X A4-A5|protein-coding	-0.0923972	0.586561	1	0.922497	0.000203375	0.0037433	1.37674	4.33e-17	9.06e-16	-0.0191102	0.915468	1	-0.0628396	0.716126	1	3.285	3.14	3.203	3.094	6.111	9.603
18606	Enpp2	NM_001285995	chr15	54670456	54751701	-	3355	1	Enpp2|ATX|E-NPP 2|Npps2|PD-Ialpha|Pdnp2|lysoPLD|-|15|15 D2|protein-coding	2.55745	1	1	2.30921	1	1	10.7316	3.03e-61	3.82e-59	2.29508	1	1	0	1	1	0.004	0	0	0.005	0.004	1.826
215446	Entpd3	NM_178676	chr9	120448936	120477443	+	3439	1	Entpd3|Cd39l3|HB6|NTPDase-3|-|9|9 F4|protein-coding	1.90237	0.0187719	0.418357	5.65267	3.51e-26	8.98e-24	7.00689	7.69e-70	1.24e-67	-1.27835	0.483921	1	-1.21556	0.484665	1	0.007	0.007	0.017	0.067	0.927	2.691
12499	Entpd5	NM_001026214	chr12	85714826	85749979	-	4953	1	Entpd5|AI196558|AI987697|Cd39l4|ER-UDPase|NTPDase-5|NTPDase5|Pcph|mNTPase|-|12 39.18 cM|12 E|protein-coding	0.314822	0.0487256	0.758232	1.487	2.52e-08	1.02e-06	1.92975	9.81e-31	4.3e-29	0.0919634	0.55231	1	-0.0121148	0.939861	1	15.199	14.097	13.705	17.615	39.184	61.163
93685	Entpd7	NM_053103	chr19	43764179	43808343	+	6035	1	Entpd7|1810012B13Rik|1810020C02Rik|2810003F23Rik|LALP1|Lysal2|-|19|19 D1|protein-coding	0.241673	0.158271	1	0.452245	0.0877431	0.462523	1.03069	1.71e-09	1.84e-08	-0.0321747	0.859286	1	-0.166182	0.345107	1	1.809	1.623	1.784	2.166	2.482	4.218
101351	Eogt	NM_175313	chr6	97060938	97098877	-	3185	1	Eogt|A130022J15Rik|AI447490|AW214473|AW259391|Aer61|-|6|6 D3|protein-coding	0.424271	0.296628	1	0.786113	0.0791198	0.430062	2.06799	2.06e-12	3.05e-11	-0.403577	0.317207	1	-0.0645644	0.924022	1	0.122	0.152	0.155	0.217	0.272	0.759
328572	Ep300	NM_177821	chr15	81416644	81482507	+	8716	1	Ep300|A430090G16|A730011L11|KAT3B|p300|p300 HAT|-|15|15 E1|protein-coding	0.266359	0.172362	1	0.432774	0.17127	0.714387	1.25646	1.68e-10	2.02e-09	0.107446	0.590389	1	0.0146466	0.940107	1	10.003	9.075	9.07	11.131	12.801	24.811
13819	Epas1	NM_010137	chr17	87153204	87232750	+	5334	1	Epas1|HIF-2alpha|HIF2A|HLF|HRF|MOP2|bHLHe73|-|17|17 E4|protein-coding	2.15366	0.24866	1	4.93382	2.12e-07	7.46e-06	7.36829	1.07e-37	6.33e-36	2.27557	0.148592	1	-0.0177956	1	1	0.013	0.002	0.002	0.012	0.084	0.53
13848	Ephb6	NM_001146351	chr6	41555481	41570506	+	3740	1	Ephb6|Cekl|Mep|-|6|6 B2.1|protein-coding	-0.15787	0.346427	1	-1.51589	4.66e-09	2.2e-07	-2.02434	5.45e-16	1.06e-14	-0.0386112	0.822288	1	0.00520955	0.974492	1	5.48	5.51	5.44	5.056	1.892	1.538
28042	Ept1	NM_027652	chr5	30559158	30598976	+	6757	1	Ept1|4933402G07Rik|AI448296|AI452230|C79563|D5Wsu178e|SELI|mKIAA1724|-|5 B1|5 16.22 cM|protein-coding	-0.166324	0.322419	1	-0.951499	0.000214277	0.00391247	-1.44377	3.43e-17	7.26e-16	0.100929	0.534463	1	0.0595841	0.721559	1	10.458	9.901	9.435	8.697	4.877	3.996
13866	Erbb2	NM_001003817	chr11	98273798	98299030	+	4969	1	Erbb2|Erbb-2|HER-2|HER2|Neu|c-erbB2|c-neu|l11Jus8|mKIAA3023|-|11 61.75 cM|11 D|protein-coding	3.66806	0.00318046	0.109177	7.11045	2.9e-26	7.66e-24	7.33259	7.03e-37	4.06e-35	-2.36155	1	1	-2.34079	1	1	0	0	0.002	0.04	0.408	0.555
238988	Erc2	NM_177814	chr14	28435628	29291723	+	6065	1	Erc2|6430531D06|CAST|CAST1/ERC2|D14Ertd171e|ELKS2alpha|-|14 A3|14 16.51 cM|protein-coding	5.13e-15	1	1	2.30925	1	1	5.51492	0.00240411	0.00977208	0	1	1	0	1	1	0	0	0	0	0.002	0.026
22592	Ercc5	NM_011729	chr1	44204589	44238105	+	3993	1	Ercc5|Xpg|-|1 23.55 cM|1 B|protein-coding	0.805273	8.26e-06	0.000758099	1.82411	2.67e-12	1.97e-10	3.26699	8.21e-67	1.22e-64	0.0463672	0.797368	1	0.134762	0.461972	1	4.252	4.414	3.992	7.239	14.095	44.22
13875	Erf	NM_010155	chr7	26027579	26035777	-	3497	1	Erf|-|-|7 A3|7 13.73 cM|protein-coding	-0.590264	0.000202435	0.01173	0.1307	0.586829	1	1.43322	7.75e-18	1.71e-16	0.115241	0.464652	1	0.156648	0.33968	1	10.649	10.55	9.425	6.559	10.269	29.629
13877	Erh	NM_007951	chr12	81735010	81744848	-	806	1	Erh|Mer|Prei1|-|12|12 D1|protein-coding	-0.192957	0.358776	1	-0.0053706	0.987442	1	-1.02168	1.51e-06	1.11e-05	-0.327975	0.111238	1	-0.214324	0.304083	1	307.13	328.997	363.195	331.881	331.987	211.969
77767	Ermn	NM_029972	chr2	57897526	57905163	-	3516	1	Ermn|A330104H05Rik|AI854460|ermin|mKIAA1189|-|2|2 C2|protein-coding	5.13e-15	1	1	5.13e-15	1	1	5.3783	0.0038662	0.015073	0	1	1	0	1	1	0	0	0	0	0	0.04
50527	Ero1l	NM_015774	chr14	45902762	45938247	-	4400	1	Ero1l|ERO1-L|-|14|14 C-D|protein-coding	-0.566591	0.000407955	0.0211881	-1.41419	4.69e-08	1.84e-06	-1.79627	1.08e-27	4.07e-26	0.0125922	0.936121	1	0.0315058	0.843666	1	16.82	16.624	16.066	11.226	6.087	5.35
67475	Ero1lb	NM_026184	chr13	12658150	12701795	+	4221	1	Ero1lb|1300013B24Rik|1700065B09Rik|AI447560|ero1-beta|-|13|13 A1|protein-coding	-0.0601984	0.772279	1	0.726131	0.00465032	0.0512994	1.39244	6.32e-11	7.98e-10	-0.148719	0.421433	1	-0.137679	0.481717	1	1.349	1.325	1.44	1.418	2.35	4.394
74155	Errfi1	NM_133753	chr4	150229200	150242989	+	3012	1	Errfi1|1300002F13Rik|AI788755|Mig-6|Mig6|RALT|-|4|4 E1|protein-coding	3.32882	0.5355	1	4.29113	0.205489	0.791072	8.49941	6.76e-21	1.81e-19	0	1	1	2.27972	1	1	0	0.004	0	0.011	0.021	0.416
71690	Esm1	NM_023612	chr13	113999867	114008312	+	2098	1	Esm1|0610042H23Rik|AV004503|ESM-1|-|13|13 D2.2|protein-coding	-2.02019	2.64e-28	7.05e-25	-4.13828	3.92e-31	1.45e-28	-4.4706	8.45e-89	2.01e-86	0.0260205	0.870931	1	-0.131732	0.411239	1	12.26	10.923	11.536	2.994	0.595	0.603
56226	Espn	NM_207687	chr4	151494985	151526316	-	2844	1	Espn|je|-|4 82.9 cM|4 E1|protein-coding	1.69215	0.657968	1	2.20005	0.277223	0.933667	3.20498	0.012731	0.0441827	1.32367	0.645979	1	-2.34194	1	1	0.012	0	0.004	0.017	0.022	0.054
26381	Esrrg	NM_001243792	chr1	189432885	190038763	+	5344	1	Esrrg|ERR3|Errg|NR3B3|mKIAA0832|-|1|1 H6|protein-coding	-0.0139819	0.938478	1	-2.6437	5.48e-16	6.25e-14	-3.05066	1.22e-50	1.14e-48	0.0552307	0.737406	1	0.0769466	0.662393	1	6.103	6.21	5.686	5.797	0.959	0.789
13984	Esx1	NM_007957	chrX	133649936	133654865	-	1593	1	Esx1|Spx1|-|X F1|X 59.1 cM|protein-coding	-0.0584398	0.770011	1	-0.664017	0.018861	0.154426	-2.2752	2.69e-20	7.03e-19	0.157782	0.449669	1	-0.00375011	1	1	3.59	3.109	3.114	3.097	1.937	0.742
23871	Ets1	NM_011808	chr9	32503627	32565405	+	5050	1	Ets1|AI196000|AI448617|D230050P06|Ets-1|Tpl1|-|9 A4|9 17.97 cM|protein-coding	0.543099	0.00149298	0.0601369	1.36818	1.19e-06	3.61e-05	1.65711	1.02e-21	2.88e-20	0.306839	0.0611554	1	0.260474	0.120153	1	29.15	27.902	22.787	33.912	60.158	82.964
104156	Etv5	NM_023794	chr16	22381386	22439643	-	3807	1	Etv5|1110005E01Rik|8430401F14Rik|ERM|-|16|16 B1|protein-coding	1.09678	1.39e-05	0.00118976	1.29592	2.91e-05	0.000660317	4.21039	3.31e-68	5.14e-66	-0.931931	0.00791275	0.619118	-1.33381	4.85e-05	0.00997701	0.185	0.136	0.343	0.769	0.817	7.355
14017	Evi2a	NM_001033711	chr11	79340063	79344111	-	2292	1	Evi2a|AW491894|Evi-2|Evi2|-|11 B5|11 46.81 cM|protein-coding	1.51051	7.66e-06	0.000716652	3.48971	3.26e-26	8.42e-24	4.43262	5.44e-77	1.02e-74	-1.00183	0.00173498	0.216171	-1.07717	0.00231692	0.205124	0.573	0.523	1.113	3.169	12.584	27.774
216984	Evi2b	NM_001077496	chr11	79326887	79337264	-	3525	1	Evi2b|Evi-2|Evi2|-|11|11 B5|protein-coding	1.03189	6.69e-09	1.31e-06	2.01809	1.45e-11	9.67e-10	2.85145	5.23e-59	6.16e-57	-0.534132	0.00414649	0.412028	-0.403044	0.0346474	1	1.853	2.015	2.591	5.42	11.016	21.603
213027	Evi5l	NM_001039578	chr8	4166567	4193701	+	1529	1	Evi5l|1700084G18Rik|2310039H16Rik|3110007G05Rik|B130050I23Rik|-|8|8 A1.1|protein-coding	-0.0224948	0.950457	1	1.31602	1.71e-06	5.01e-05	1.60911	2.66e-15	4.88e-14	0.132279	0.526508	1	0.0108571	0.978841	1	2.347	2.125	2.053	2.097	4.927	7.284
14026	Evl	NM_001163396	chr12	109873963	109926725	+	1940	1	Evl|AI528774|-|12|12 F2|protein-coding	-0.0166776	1	1	1.83439	1.75e-07	6.23e-06	3.88125	1.4e-56	1.53e-54	-0.540691	0.12816	1	-1.08789	0.00410413	0.30089	0.376	0.249	0.521	0.534	1.827	9.018
241624	Exd1	NM_172857	chr2	119345140	119373363	-	3128	1	Exd1|4932702D22Rik|Exdl1|-|2|2 E5|protein-coding	0.776685	0.0632364	0.878843	1.53633	0.000265972	0.00469246	2.26511	5.65e-12	7.95e-11	-0.265766	0.632439	1	0.329578	0.451066	1	0.094	0.139	0.109	0.194	0.31	0.611
26909	Exo1	NM_012012	chr1	177810909	177841527	+	5489	1	Exo1|5730442G03Rik|Msa|-|1 H4|1 81.9 cM|protein-coding	0.00606753	0.972062	1	-0.565195	0.0243209	0.184785	-1.22264	2.17e-14	3.73e-13	0.0770649	0.61694	1	0.0800811	0.616855	1	14.109	14.041	12.865	13.486	8.691	6.392
74190	Exoc3l4	NM_001289489	chr12	112655656	112669889	+	3154	1	Exoc3l4|1200009I06Rik|1600013K19Rik|-|12|12 F2|protein-coding	-0.36167	0.135573	1	-0.978082	0.00506344	0.0549461	-1.08665	4.74e-05	0.000269773	-0.596491	0.0101996	0.715071	-0.582496	0.0170769	0.754928	1.377	1.341	1.975	1.647	0.938	1.092
66583	Exosc1	NM_025644	chr19	41997470	42007804	-	1612	1	Exosc1|2610035C18Rik|2610104C07Rik|2610312F07Rik|AI447561|-|19|19 D1|protein-coding	-0.202268	0.201815	1	-0.742768	0.00327963	0.0387164	-1.21397	5.47e-14	9.15e-13	-0.092957	0.545333	1	-0.16459	0.29616	1	24.7	23.179	25.193	22.706	14.298	12.667
227715	Exosc2	NM_144886	chr2	31526257	31536827	+	1611	1	Exosc2|Rrp4|-|2|2 B|protein-coding	0.0676395	0.676901	1	-0.454061	0.0741542	0.411157	-1.092	1.9e-11	2.54e-10	-0.0676532	0.667851	1	-0.00849709	0.958223	1	54.076	55.969	54.145	59.036	38.347	29.662
66362	Exosc3	NM_025513	chr4	45329502	45333475	-	1028	1	Exosc3|2310005D06Rik|AI593501|Rrp40|-|4|4 B2|protein-coding	-0.0572618	0.754424	1	-0.235613	0.388935	1	-1.24176	1.44e-11	1.94e-10	-0.202247	0.272169	1	-0.0859021	0.639832	1	53.417	57.322	58.176	58.526	47.396	28.96
72544	Exosc6	NM_028274	chr8	113580239	113581564	+	1323	1	Exosc6|2610510N21Rik|C76919|Mtr3|-|8|8 E1|protein-coding	-0.215437	0.240862	1	-0.597803	0.0316128	0.225176	-1.07597	2.24e-09	2.37e-08	-0.177203	0.307079	1	-0.144749	0.441724	1	48.887	47.882	52.498	46.732	32.79	29.252
66446	Exosc7	NM_001081188	chr9	123022349	123045247	+	1027	1	Exosc7|2610002K22Rik|AV212732|mKIAA0116|-|9|9 F4|protein-coding	-0.139317	0.404775	1	-0.624741	0.0141979	0.124016	-1.40395	5.69e-17	1.19e-15	-0.132492	0.415617	1	-0.0173926	0.91735	1	57.043	61.565	59.572	56.854	37.686	26.345
69639	Exosc8	NM_027148	chr3	54532601	54539286	-	1257	1	Exosc8|2310032N20Rik|CIP3|mKIAA4013|-|3|3 D|protein-coding	-0.0802669	0.634728	1	-0.195607	0.475585	1	-1.09895	1.06e-10	1.3e-09	-0.134524	0.410758	1	-0.100123	0.549067	1	51.988	52.597	54.394	53.397	44.603	29.759
320051	Exph5	NM_176846	chr9	53109775	53189263	+	9593	1	Exph5|AC079869.22gm5|B130009M24Rik|E030050P12|Kiaa0624|Slac2b|slac2-b|-|9|9 A5.3|protein-coding	3.85636	0.29613	1	4.67123	0.0834807	0.446499	5.3768	0.00403969	0.0156884	4.36429	0.0783689	1	3.1914	0.528744	1	0.006	0.003	0	0.005	0.007	0.015
14051	Eya4	NM_010167	chr10	22823974	23069709	-	4078	1	Eya4|B130023L16Rik|-|10 A3|10 10.44 cM|protein-coding	5.13e-15	1	1	3.27249	0.542166	1	7.239	8.16e-10	9.07e-09	0	1	1	0	1	1	0	0	0	0	0.006	0.128
58992	F12	NM_021489	chr13	55519319	55528165	-	1955	1	F12|FXII|HAF|-|13|13 B2|protein-coding	3.32971	0.534712	1	6.56839	1.55e-05	0.000377588	10.063	4.47e-47	3.68e-45	0	1	1	0	1	1	0	0	0	0.017	0.137	1.892
74145	F13a1	NM_001166391	chr13	36959047	37142113	-	3837	1	F13a1|1200014I03Rik|AI462306|F13a|-|13|13 A3.3|protein-coding	0.105415	0.776861	1	-0.583712	0.279372	0.937428	-1.73743	0.000294754	0.00144475	0.502602	0.16377	1	0.494426	0.148884	1	0.359	0.353	0.248	0.274	0.173	0.084
14065	F2rl3	NM_007975	chr8	75285779	75287784	+	1758	1	F2rl3|PAR4|-|8 35.08 cM|8 B3.3|protein-coding	-0.722571	0.00676492	0.197183	-2.49343	7.61e-12	5.29e-10	-2.22712	8.62e-16	1.65e-14	0.505763	0.0133558	0.829612	0.327894	0.129226	1	2.296	1.965	1.551	1.001	0.276	0.384
320046	F730043M19Rik	NR_015602	chr12	33796576	33832451	-	1545	1	F730043M19Rik|-|-|12|12|ncRNA	-0.0815641	0.891296	1	-1.83463	0.00748969	0.0754839	-1.68237	0.00538868	0.0203713	0.0953278	0.90599	1	-0.738903	0.211615	1	0.228	0.125	0.205	0.202	0.058	0.073
14069	F8	NM_007977	chrX	72418056	72625380	-	7479	1	F8|Cf-8|Cf8|FVIII|-|X 38.17 cM|X A7-B|protein-coding	0.325465	0.285601	1	0.95311	0.00559355	0.0595168	1.82854	8.71e-13	1.33e-11	0.680275	0.013993	0.851407	0.58067	0.0935934	1	0.242	0.21	0.146	0.189	0.276	0.6
240328	F830016B08Rik	NM_001101475	chr18	60453034	60462670	+	3293	1	F830016B08Rik|Ifgga4|-|18|18 D3|protein-coding	-0.297543	0.547508	1	-1.48861	0.00236507	0.0294678	1.16712	5.29e-05	0.00029849	1.06653	0.00853519	0.641873	0.823178	0.0163082	0.734388	0.457	0.367	0.211	0.175	0.074	0.551
14073	Faah	NM_010173	chr4	115669261	115690507	-	3799	1	Faah|AW412498|-|4 D1|4 53.08 cM|protein-coding	-0.0537523	0.743375	1	-1.02403	4.09e-05	0.000893236	-1.16693	1.33e-11	1.8e-10	0.140307	0.387053	1	0.0903532	0.577853	1	6.228	5.876	5.449	5.471	2.674	2.81
101831	Faap24	NM_178643	chr7	36177171	36181786	-	1782	1	Faap24|AW124591|AW538696|C230052I12Rik|-|7|7 B2|protein-coding	-0.115179	0.483428	1	-0.539653	0.0326403	0.230177	-1.23872	7.94e-12	1.1e-10	-0.146624	0.361988	1	-0.181307	0.270063	1	15.431	14.704	16.286	15.594	10.724	8.057
11770	Fabp4	NM_024406	chr3	10204343	10208576	-	635	1	Fabp4|422/aP2|ALBP/Ap2|Ap2|Lbpl|-|3 A1|3 2.56 cM|protein-coding	-0.886862	8.1e-06	0.000749499	-2.30182	3.96e-09	1.89e-07	-4.31258	1.74e-34	8.99e-33	-0.193414	0.315914	1	0.113395	0.564962	1	26.089	31.199	28.265	15.977	5.079	1.661
16592	Fabp5	NM_010634	chr3	10012585	10016610	+	947	1	Fabp5|E-FABP|Fabpe|Klbp|PA-FABP|mal1|-|3|3 A1-A3|protein-coding	-0.397126	0.0323513	0.592499	-0.845853	0.0039786	0.0451929	-2.65743	1.89e-42	1.33e-40	-0.16672	0.361945	1	0.0414726	0.824308	1	239.471	275.726	254.63	204.991	132.986	47.445
56473	Fads2	NM_019699	chr19	10138654	10175993	-	1494	1	Fads2|2900042M13Rik|Fadsd2|-|19|19 B|protein-coding	-0.197935	0.228562	1	-0.474694	0.0723856	0.405842	-1.59964	6.3e-22	1.79e-20	-0.0660593	0.67056	1	-0.037174	0.815034	1	67.785	68.268	68.259	62.415	50.301	26.102
328035	Fads6	NM_178035	chr11	115144680	115158860	-	1231	1	Fads6|BC044804|OTTMUSG00000021749|-|11|11 E2|protein-coding	-0.388317	0.146998	1	-1.99348	3.05e-07	1.04e-05	-2.63674	1.49e-13	2.39e-12	0.0035089	1	1	0.0326769	0.893098	1	1.74	1.757	1.681	1.322	0.414	0.308
68636	Fahd1	NM_023480	chr17	24985841	24987247	-	1404	1	Fahd1|1110025H10Rik|AV002085|-|17|17 A3.3|protein-coding	-0.119116	0.537936	1	-0.708951	0.0113774	0.104704	-1.18081	2.67e-08	2.49e-07	-0.169859	0.369329	1	-0.0578023	0.77959	1	3.059	3.252	3.307	3.15	1.97	1.693
98952	Fam102a	NM_153560	chr2	32390879	32425270	+	4204	1	Fam102a|AI426465|C230093N12Rik|Eeig1|-|2|2 B|protein-coding	0.184481	0.30366	1	0.520161	0.0774649	0.423749	2.51969	2.47e-36	1.39e-34	-0.241931	0.275601	1	-0.146486	0.557457	1	1.271	1.279	1.445	1.705	2.156	9.624
66540	Fam107b	NM_025626	chr2	3630730	3699406	+	3142	1	Fam107b|3110001A13Rik|AA589595|AA959793|AI132312|-|2|2 A1|protein-coding	-0.53403	0.00183796	0.0709428	-1.45528	3.14e-08	1.26e-06	-1.93944	1.46e-28	5.75e-27	0.295352	0.0710838	1	0.21673	0.19596	1	84.598	79.747	66.51	48.01	23.918	20.006
107373	Fam111a	NM_026640	chr19	12648015	12664186	+	3193	1	Fam111a|4632417K18Rik|AW413625|-|19|19 B|protein-coding	0.453764	0.00749034	0.213751	1.11845	0.000145467	0.00280292	1.33965	5.65e-15	1.01e-13	-0.0178051	0.917299	1	-0.0915434	0.599823	1	31.949	30.407	31.261	44.03	70.611	91.242
78755	Fam122b	NM_030167	chrX	50596592	50622982	-	4323	1	Fam122b|4632404H22Rik|AI256344|SPACIA2|-|X|X A5|protein-coding	0.0530489	0.758129	1	-0.210196	0.392971	1	-1.07653	2.56e-09	2.68e-08	0.157689	0.338626	1	0.00422961	0.983202	1	6.691	5.836	5.775	6.024	4.914	3.056
629059	Fam124a	NM_001243857	chr14	63174574	63227322	+	3551	1	Fam124a|EG629059|-|14 D1|14|protein-coding	5.13e-15	1	1	5.13e-15	1	1	6.73466	3.26e-07	2.63e-06	0	1	1	0	1	1	0	0	0	0	0	0.103
67389	Fam132a	NM_026125	chr4	155336421	155340738	+	1311	1	Fam132a|1110035L05Rik|C1qdc2|CTRP12|alipolin|-|4 E2|4 87.66 cM|protein-coding	0.960633	0.00252497	0.0911111	0.328503	0.405243	1	1.17214	6.55e-05	0.000363023	0.620291	0.0527839	1	0.683723	0.0413226	1	0.844	0.839	0.529	1.079	0.632	1.384
66488	Fam136a	NM_025591	chr6	86315677	86320052	+	1601	1	Fam136a|2010309E21Rik|AW124904|Hyccin|-|6|6 D1|protein-coding	-0.409669	0.0352567	0.628013	-0.739778	0.0130469	0.116199	-1.31433	2.73e-11	3.6e-10	-0.239693	0.208523	1	-0.174986	0.370001	1	63.725	66.12	71.141	56.108	40.083	33.773
225358	Fam13b	NM_146084	chr18	34602005	34666477	-	3321	1	Fam13b|2610024E20Rik|AW060714|AW546153|-|18|18 B1|protein-coding	0.126285	0.434772	1	0.417013	0.0988657	0.499354	1.12936	1.63e-12	2.43e-11	0.0418384	0.800587	1	0.0629418	0.705676	1	6.877	6.904	6.434	7.254	8.733	16.294
230579	Fam151a	NM_146149	chr4	106406520	106420897	+	1887	1	Fam151a|2010309H15Rik|-|4|4 C7|protein-coding	2.49517	0.00698019	0.20107	3.14334	7.21e-05	0.0014994	4.02322	3.24e-07	2.61e-06	1.29757	0.272285	1	1.55724	0.18501	1	0.05	0.058	0.019	0.113	0.176	0.38
74349	Fam160a2	NM_001242364	chr7	112519725	112548568	-	10881	1	Fam160a2|4632419K20Rik|6530415H11Rik|FHIP|-|7|7 E3|protein-coding	0.198371	0.319108	1	0.926497	0.00175533	0.0231925	1.62028	9.04e-17	1.85e-15	0.557778	0.00400029	0.403065	0.652001	0.00150524	0.153375	1.302	1.337	0.859	1.003	1.68	3.033
73873	Fam161a	NM_028672	chr11	22913387	22923741	+	1931	1	Fam161a|4930430E16Rik|-|11|11 A3.3|protein-coding	-0.55682	0.490729	1	2.53623	1.36e-08	5.86e-07	5.61805	1.83e-84	4.12e-82	-1.3476	0.0539499	1	-1.49031	0.0178576	0.777938	0.049	0.044	0.122	0.085	0.72	7.02
217705	Fam161b	NM_172581	chr12	85686267	85702771	-	3347	1	Fam161b|9330169D17|9830169C18Rik|-|12|12 D1|protein-coding	0.738265	0.00913754	0.246888	1.86862	1.39e-08	5.96e-07	2.76111	9.3e-28	3.52e-26	-0.159055	0.59992	1	-0.147763	0.643738	1	0.25	0.249	0.267	0.462	0.983	2.118
70186	Fam162a	NM_027342	chr16	36043930	36071601	-	628	1	Fam162a|2310056P07Rik|HGTD-P|-|16|16 B3|protein-coding	-0.571262	0.00830592	0.229127	-0.476324	0.195488	0.768756	-1.61419	7.41e-14	1.22e-12	-0.3719	0.079211	1	-0.17922	0.394716	1	82.156	91.371	100.003	69.935	63.497	38.717
109349	Fam163b	NM_175427	chr2	26965899	26997997	-	2941	1	Fam163b|C630035N08Rik|-|2|2 A3|protein-coding	-1.56343	0.0127373	0.316093	-6.54606	8.24e-06	0.000209641	-4.25057	1.62e-05	0.000100566	-0.124606	0.796911	1	-0.352378	0.499175	1	0.092	0.078	0.096	0.034	0	0.005
434197	Fam169b	NM_001013811	chr7	75418725	75507976	+	2808	1	Fam169b|EG434197|-|7 D1|7|protein-coding	-0.455861	0.0046616	0.146917	-1.98836	8.34e-15	8.61e-13	-3.05176	2.46e-45	1.95e-43	-0.028243	0.854959	1	-0.10709	0.49868	1	32.424	30.39	31.742	24.237	7.836	4.432
109359	Fam175b	NM_198017	chr7	140050908	140076797	+	2884	1	Fam175b|AA589499|AI853413|Abro1|C430003P19Rik|-|7|7 F3|protein-coding	0.645062	3.04e-05	0.00233249	1.00665	6.04e-05	0.00128172	1.07492	6.89e-12	9.64e-11	-0.125164	0.413335	1	-0.153449	0.330157	1	9.902	9.659	10.356	16.797	21.133	25.365
320159	Fam179a	NM_177087	chr17	72022601	72079009	+	3481	1	Fam179a|4632412N22Rik|-|17|17 E1.3|protein-coding	0.616619	0.177066	1	1.98754	4.24e-07	1.4e-05	4.2471	1.42e-51	1.36e-49	-0.299567	0.564115	1	0.0783006	0.914241	1	0.091	0.118	0.108	0.175	0.425	2.404
75429	Fam183b	NM_029283	chr11	58606304	58615462	-	556	1	Fam183b|3100002J23Rik|Theg6|-|11|11 B1.3|protein-coding	-0.186652	0.810003	1	-1.47262	0.016036	0.136454	-2.00706	0.000654468	0.00299429	0.315668	0.445118	1	0.221995	0.617713	1	0.931	0.847	0.719	0.651	0.252	0.202
330050	Fam185a	NM_177869	chr5	20930721	20987942	+	3072	1	Fam185a|4631428I10|AI847670|-|5|5 A3|protein-coding	-0.0405759	0.839954	1	-1.09262	6.31e-05	0.00133036	-1.70056	5.47e-16	1.06e-14	0.100065	0.586752	1	0.0567544	0.76664	1	2.604	2.47	2.323	2.339	1.071	0.833
68241	Fam195a	NM_026633	chr17	26000643	26005683	-	809	1	Fam195a|9530058B02Rik|-|17|17 B1|protein-coding	-0.464501	0.0554731	0.809797	-1.08256	0.00716041	0.0730842	-1.94774	6.28e-14	1.04e-12	-0.518587	0.0312581	1	-0.48029	0.0491798	1	34.673	34.598	46.551	35.63	19.303	14.376
574403	Fam196b	NM_001025382	chr11	34214822	34322640	+	5365	1	Fam196b|EG574403|Gm6041|-|11 A4|11|protein-coding	1.33807	0.146288	1	0.84803	0.313184	0.98601	2.25392	0.000141879	0.000740401	0.264655	0.832547	1	-1.85998	0.135006	1	0.022	0.005	0.018	0.043	0.029	0.1
268354	Fam19a2	NM_001252387	chr10	122701132	123178260	+	4145	1	Fam19a2|6330575M02|FAM19A2 TAFA-2|TAFA2|Tafa-2|-|10|10 D2|protein-coding	0.835955	0.455125	1	3.70809	1.37e-10	8.02e-09	3.41088	5.59e-09	5.64e-08	-0.302935	1	1	-0.935625	0.538425	1	0.014	0.009	0.017	0.032	0.221	0.217
80752	Fam20c	NM_030565	chr5	139231035	139286017	+	2989	1	Fam20c|C76981|DMP-4|DMP4|GEF-CK|mKIAA4081|-|5|5 G2|protein-coding	-3.02564	0.540827	1	0.721344	1	1	2.88499	0.00332407	0.0131444	-3.22145	0.530094	1	-3.20109	0.541541	1	0	0	0.008	0	0.013	0.075
235493	Fam214a	NM_001113283	chr9	74800860	74880275	+	4340	1	Fam214a|6330415I01Rik|AI553555|C130047D21Rik|Kiaa1370|mKIAA1370|-|9|9 D|protein-coding	0.199227	0.406594	1	0.905086	0.00358506	0.0416071	1.69354	1.2e-12	1.81e-11	0.398916	0.112669	1	0.554543	0.0208977	0.846493	1.619	1.759	1.2	1.406	2.238	4.436
230088	Fam214b	NM_001253353	chr4	43045286	43053173	-	3282	1	Fam214b|B230312A22Rik|-|4|4 A5|protein-coding	-0.690849	0.0841366	1	1.80938	1.19e-07	4.39e-06	3.66697	6.42e-47	5.24e-45	-0.413402	0.253381	1	-0.00444488	0.946159	1	0.177	0.237	0.219	0.145	0.767	3.274
68948	Fam216a	NM_026883	chr5	122814593	122821972	-	974	1	Fam216a|1500011H22Rik|-|5|5 F|protein-coding	-0.215712	0.235984	1	-0.34334	0.237378	0.855183	-1.11839	2.98e-09	3.1e-08	-0.20673	0.24674	1	-0.0396384	0.8267	1	33.39	37.034	36.554	32.852	26.726	19.823
71901	Fam219a	NM_001159583	chr4	41465962	41516560	-	2101	1	Fam219a|2310028H24Rik|-|4|4 A5|protein-coding	0.309409	0.247816	1	0.896676	0.00594091	0.0624666	1.35697	2.16e-08	2.04e-07	-0.199607	0.47065	1	-0.333058	0.273939	1	0.62	0.52	0.665	0.867	1.264	2.013
76992	Fam219aos	NR_045726	chr4	41464470	41465962	+	705	1	Fam219aos|1700066J24Rik|-|4|4 A5|ncRNA	0.901597	0.0903239	1	1.4137	0.0109901	0.102117	2.11712	1.21e-06	8.95e-06	0.643415	0.303944	1	0.0805604	1	1	0.467	0.308	0.283	0.56	0.759	1.456
433940	Fam222a	NM_001004180	chr5	115018260	115063227	+	2688	1	Fam222a|-|-|5|5 F|protein-coding	0.258579	0.214502	1	0.729142	0.00771944	0.0773134	2.33121	4.02e-30	1.71e-28	0.275467	0.169644	1	0.304648	0.139917	1	1.488	1.506	1.181	1.456	1.911	6.901
216971	Fam222b	NM_145430	chr11	77908175	77970841	+	3879	1	Fam222b|9630020I17Rik|-|11|11 B5|protein-coding	0.125009	0.443975	1	0.502655	0.0779116	0.425418	1.08006	2.01e-11	2.68e-10	0.116655	0.471652	1	0.125137	0.455352	1	5.229	5.216	4.651	5.227	6.931	11.384
75729	Fam227a	NM_029407	chr15	79440006	79489386	-	5167	1	Fam227a|4933432B09Rik|-|15|15 E1|protein-coding	0.2619	0.607588	1	1.77102	5.76e-05	0.00122718	2.53344	2.54e-14	4.35e-13	0.826614	0.0442168	1	-0.0697583	1	1	0.109	0.056	0.059	0.073	0.192	0.4
74855	Fam228a	NM_029107	chr12	4720611	4745189	-	2823	1	Fam228a|4930417G10Rik|-|12|12 A1.1|protein-coding	0.345553	0.508996	1	0.14174	1	1	1.28387	0.0129719	0.0449346	0.464558	0.38729	1	1.02913	0.0320361	1	0.096	0.137	0.067	0.087	0.077	0.189
74525	Fam234b	NM_028982	chr6	135148005	135186258	+	4194	1	Fam234b|8430419L09Rik|Kiaa1467|mKIAA1467|-|6|6 G1|protein-coding	-1.87296	0.140925	1	-1.49081	0.358784	1	4.26116	2.34e-22	6.86e-21	-1.06137	0.305591	1	-3.11217	0.043202	1	0.014	0.003	0.028	0.008	0.009	0.647
52793	Fam3b	NM_020622	chr16	97692693	97726543	-	841	1	Fam3b|2-21|9030624C24Rik|D16Jhu19e|ORF9|Pander|-|16 C4|16 57.47 cM|protein-coding	0.556259	0.512415	1	2.46289	2.2e-05	0.000517694	3.55062	2.19e-15	4.06e-14	-0.60785	0.650095	1	-0.00741295	1	1	0.084	0.129	0.126	0.196	0.682	1.756
224093	Fam43a	NM_177632	chr16	30599809	30602883	+	3072	1	Fam43a|Tuf1|-|16|16 B2|protein-coding	2.22651	1.3e-22	1.95e-19	3.93113	1.86e-37	9.93e-35	5.72426	1.34e-152	8.46e-150	-0.689925	0.0187539	0.980379	-0.624577	0.0391461	1	0.26	0.267	0.402	1.964	6.013	24.843
100342	Fam46b	NM_175307	chr4	133036048	133043855	+	2284	1	Fam46b|4732473B16Rik|AU045678|AU046069|-|4|4 D2.3|protein-coding	0.420379	0.534532	1	2.31218	4.07e-07	1.35e-05	1.98219	1.79e-06	1.29e-05	0.16083	0.889972	1	-0.254297	0.753846	1	0.108	0.079	0.093	0.13	0.458	0.431
213449	Fam46d	NM_001163104	chrX	105011816	105068250	+	3093	1	Fam46d|Gm377|-|X|X D|protein-coding	-0.807455	0.0283563	0.54682	-1.46981	0.000689332	0.0105784	-1.44126	9.71e-05	0.000521342	-0.237464	0.466129	1	-0.0760185	0.797195	1	0.255	0.285	0.289	0.17	0.103	0.123
108161	Fam50b	NM_138746	chr13	34831511	34839491	+	1311	1	Fam50b|D0H6S2654E|X5L|XAP-5-like|-|13|13 A3.3|protein-coding	-0.408785	0.575598	1	-5.95234	0.000336707	0.00576284	-3.66096	0.000800982	0.00359955	0.524882	0.330476	1	0.0532733	1	1	0.215	0.147	0.143	0.113	0	0.011
116972	Fam57a	NM_027773	chr11	76015558	76021759	+	923	1	Fam57a|2310047D13Rik|4932415L08Rik|5430402E13Rik|5430420K21Rik|Wdt3|-|11|11 B5|protein-coding	-0.121279	0.667517	1	-0.809298	0.0208737	0.166429	-1.05371	0.000510552	0.00238069	-0.292993	0.281781	1	-0.0641311	0.823146	1	2.983	3.429	3.451	3.367	1.961	1.965
69553	Fam65c	NM_001080708	chr2	167806286	167836093	-	2911	1	Fam65c|2310033K02Rik|Gm124|-|2|2 H3|protein-coding	-1.01559	0.64868	1	4.01687	1.29e-08	5.58e-07	8.07397	7.66e-97	2e-94	0.641863	0.742982	1	0.7734	0.555839	1	0.02	0.021	0.012	0.006	0.215	4.111
75538	Fam71e1	NM_028169	chr7	51751958	51756504	+	842	1	Fam71e1|0610007G24Rik|1700021N13Rik|1700021P22Rik|GARI-L5|-|7|7 B4|protein-coding	-0.193975	0.77856	1	0.659378	0.199234	0.77763	1.26498	0.00161543	0.00682472	-0.662525	0.270681	1	-0.567105	0.425701	1	0.238	0.244	0.363	0.332	0.56	1.019
243822	Fam71e2	NM_172895	chr7	4704829	4722872	-	2673	1	Fam71e2|4930401F20Rik|-|7|7 A1|protein-coding	5.13e-15	1	1	3.76452	0.302284	0.977907	5.95005	0.000208221	0.00105103	2.29493	1	1	2.4025	1	1	0.004	0.005	0	0	0.014	0.079
215708	Fam73a	NM_174868	chr3	151936424	152003371	-	5336	1	Fam73a|A930038D06|AI852168|C030011O14Rik|-|3|3 H3|protein-coding	-1.72803	0.0958693	1	1.12669	0.0701107	0.395856	3.92384	2.83e-23	8.68e-22	-0.277418	0.858959	1	-1.19177	0.147358	1	0.027	0.014	0.032	0.01	0.062	0.557
241303	Fam78a	NM_175511	chr2	31922405	31939225	-	4007	1	Fam78a|A130092J06Rik|-|2|2 B|protein-coding	0.253304	0.343635	1	0.894998	0.0348556	0.241548	1.05527	1.95e-05	0.000118884	-0.53565	0.047546	1	-0.444411	0.119527	1	0.267	0.277	0.373	0.455	0.751	0.902
239463	Fam83a	NM_173862	chr15	57817458	57842257	+	2079	1	Fam83a|-|-|15|15 D1|protein-coding	-0.999029	0.00336747	0.113818	-0.44324	0.241004	0.85868	-1.02795	0.00185726	0.00773895	-0.864265	0.00610937	0.531867	-0.366105	0.266718	1	0.306	0.418	0.537	0.277	0.399	0.304
71405	Fam83c	NM_027788	chr2	155654919	155660590	-	2331	1	Fam83c|5530400B04Rik|-|2|2 H2|protein-coding	2.4704	0.151232	1	7.57733	8.79e-32	3.47e-29	11.1073	1.99e-164	1.37e-161	-2.32952	1	1	-2.30114	1	1	0	0	0.005	0.035	1.203	16.18
237211	Fancb	NM_001146081	chrX	161418524	161435204	+	2945	1	Fancb|BC022692|-|X|X F5|protein-coding	0.0393202	0.825289	1	-0.261753	0.31093	0.983279	-1.22578	1.38e-10	1.67e-09	0.0625161	0.719509	1	0.0965088	0.608001	1	3.232	3.29	2.981	3.177	2.424	1.476
14089	Fap	NM_007986	chr2	62338993	62412078	-	2676	1	Fap|SIMP|-|2 C1.3|2 35.85 cM|protein-coding	0.706426	0.174987	1	2.14967	1.94e-06	5.64e-05	3.52841	3.87e-23	1.18e-21	0.515005	0.30777	1	0.264452	0.629047	1	0.149	0.122	0.101	0.172	0.434	1.361
14102	Fas	NM_007987	chr19	34365149	34402260	+	1475	1	Fas|AI196731|APO1|APT1|CD95|TNFR6|Tnfrsf6|lpr|-|19 C1|19 29.48 cM|protein-coding	-0.833143	0.0685375	0.918685	-1.40925	0.0217078	0.170591	-1.78969	0.000489264	0.00228808	0.261998	0.580271	1	0.765617	0.0380672	1	0.431	0.598	0.343	0.201	0.121	0.114
320720	Fastkd1	NM_177244	chr2	69524881	69550663	-	2840	1	Fastkd1|5330408N05Rik|mKIAA1800|-|2|2 C2|protein-coding	0.0218825	0.904335	1	-0.921706	0.000721499	0.0109601	-1.2381	6.69e-10	7.51e-09	0.0516693	0.772621	1	0.0641854	0.722889	1	4.209	4.164	3.924	4.128	2.078	1.921
75619	Fastkd2	NM_172422	chr1	63777199	63799959	+	3191	1	Fastkd2|2810421I24Rik|-|1|1 C2|protein-coding	-0.160977	0.315962	1	-0.634951	0.0107499	0.10035	-1.16978	3.54e-12	5.08e-11	-0.0763538	0.629002	1	0.0522824	0.76049	1	8.119	8.885	8.181	7.575	5.046	4.244
245827	Fat2	NM_001029988	chr11	55064112	55125759	-	14398	1	Fat2|EMI2|Fath2|Gm523|mKIAA0811|-|11|11 B1.3|protein-coding	3.32948	0.534911	1	8.04419	4.01e-12	2.9e-10	8.43319	4.36e-20	1.12e-18	0	1	1	0	1	1	0	0	0	0.002	0.058	0.083
270120	Fat3	NM_001080814	chr9	15714637	16182675	-	18441	1	Fat3|9430076A06Rik|D430038H04Rik|Gm1132|Gm510|MFAT3F|-|9|9 A2|protein-coding	5.13e-15	1	1	5.13e-15	1	1	5.3909	0.0129907	0.0449931	0	1	1	0	1	1	0	0	0	0	0	0.008
14113	Fbl	NM_007991	chr7	28954767	28964288	+	1148	1	Fbl|AL022665|FIB|FLRN|RNU3IP1|-|7|7 A1|protein-coding	0.0162922	0.92108	1	-0.431502	0.0958602	0.491713	-1.12337	8.48e-12	1.18e-10	-0.0277664	0.861485	1	0.0259215	0.874271	1	316.342	325.701	308.207	326.756	223.857	164.942
14115	Fbln2	NM_001081437	chr6	91162758	91222534	+	4317	1	Fbln2|5730577E14Rik|FIBL-2|-|6 D|6 40.42 cM|protein-coding	-0.25924	0.173076	1	0.138381	0.604475	1	-1.26991	4.4e-10	5.03e-09	-0.309878	0.0982877	1	-0.218191	0.248416	1	5.326	5.636	6.249	5.432	7.061	3.056
14118	Fbn1	NM_007993	chr2	125126330	125332174	-	9832	1	Fbn1|AI536462|B430209H23|Fib-1|Tsk|-|2 F|2 61.38 cM|protein-coding	1.0928	0.000226448	0.0130273	1.79397	4.8e-05	0.00103492	2.37248	1.01e-19	2.51e-18	0.823056	0.00898465	0.652971	0.260001	0.458398	1	0.126	0.081	0.068	0.151	0.254	0.412
14121	Fbp1	NM_019395	chr13	62966113	62989642	-	1470	1	Fbp1|Fbp-2|Fbp2|Fbp3|-|13|13 B3-C1|protein-coding	-0.186534	0.25226	1	-1.2668	3.49e-07	1.18e-05	-3.31785	3.53e-36	1.98e-34	-0.635173	7.55e-05	0.0193075	-0.656751	0.000115549	0.0202819	27.542	27.25	40.819	37.159	16.52	4.755
14123	Fbrs	NM_010183	chr7	134628735	134635027	+	2637	1	Fbrs|Fbs|Fbs1|-|7|7 F4|protein-coding	0.235839	0.166294	1	0.839163	0.0017053	0.022606	1.60093	1.13e-19	2.81e-18	0.0694213	0.684988	1	0.0419878	0.808633	1	13.355	12.639	12.351	14.897	22.513	43.164
66662	Fbxl12os	NR_033729	chr9	20411919	20421715	+	2352	1	Fbxl12os|5730577I03Rik|-|9|9 A3|pseudo	-0.309706	0.552178	1	1.26847	0.0120698	0.109568	1.79151	1.13e-08	1.1e-07	0.0724868	0.876475	1	-0.141965	0.867766	1	0.25	0.205	0.23	0.189	0.488	0.921
214931	Fbxl16	NM_001164225	chr17	25946030	25958210	+	3491	1	Fbxl16|BC042620|Scirr1|-|17|17 A3.3|protein-coding	-0.0323869	0.925479	1	-1.65404	0.0111097	0.102725	-2.23035	9.18e-06	5.93e-05	0.451869	0.190977	1	0.521588	0.13529	1	0.236	0.242	0.165	0.17	0.047	0.04
72194	Fbxl20	NM_028149	chr11	97943868	98010930	-	8590	1	Fbxl20|2610511F20Rik|4632423N09Rik|AI849362|AL117906|C86145|Fbl2|Scr|mKIAA4147|-|11|11 D|protein-coding	0.0596383	0.724901	1	0.813668	0.00195555	0.0253232	1.89697	9.95e-29	3.94e-27	0.178145	0.2822	1	0.0967721	0.57757	1	2.8	2.558	2.393	2.565	4.302	10.286
71176	Fbxo24	NM_027708	chr5	138053733	138066306	-	2147	1	Fbxo24|4933422D21Rik|Fbx24|-|5|5 G1|protein-coding	0.119593	0.835763	1	0.397349	0.365282	1	1.9244	3.73e-10	4.29e-09	0.149095	0.802388	1	-0.214037	0.78333	1	0.252	0.186	0.219	0.245	0.273	0.969
67731	Fbxo32	NM_026346	chr15	58007434	58046447	-	6925	1	Fbxo32|4833442G10Rik|AI430017|ATROGIN1|Gm20361|MAFbx|-|15|15 D2|protein-coding	0.572984	0.0471673	0.738864	1.64736	2.3e-07	7.99e-06	3.16421	2.11e-42	1.47e-40	0.0683696	0.820319	1	-0.341302	0.285202	1	0.165	0.122	0.151	0.235	0.457	1.574
66153	Fbxo36	NM_025386	chr1	84836416	84897061	+	894	1	Fbxo36|0610008D19Rik|1110020F21Rik|2410002G19Rik|D1Ertd757e|-|1 C5|1 43.43 cM|protein-coding	-0.00399144	1	1	0.0032555	1	1	1.25585	5.45e-07	4.26e-06	0.0318586	0.96316	1	0.0751219	0.78406	1	1.685	1.689	1.578	1.637	1.611	4.389
78803	Fbxo43	NM_001081253	chr15	36079815	36094639	-	4028	1	Fbxo43|4930533G20Rik|Emi2|-|15|15 B3.1|protein-coding	2.15368	0.248712	1	2.86419	0.0680686	0.38797	3.91012	0.000313688	0.00152883	2.02223	0.25651	1	2.08472	0.251257	1	0.015	0.015	0.003	0.016	0.025	0.063
68628	Fbxw9	NM_026791	chr8	87584018	87591019	+	1830	1	Fbxw9|1110017H11Rik|Fbw9|-|8|8 C3|protein-coding	-0.105027	0.58367	1	0.650898	0.0129888	0.11594	1.18771	6.55e-11	8.25e-10	-0.120097	0.560357	1	0.0473744	0.815855	1	2.405	2.64	2.511	2.426	3.894	6.655
14127	Fcer1g	NM_010185	chr1	173159703	173164480	-	651	1	Fcer1g|AI573376|CD23|FcR-gamma|FcR[g]|FcRgamma|Fce1g|FcepsilonRI|Ly-50|-|1 H3|1 79.23 cM|protein-coding	0.189979	0.59492	1	0.424523	0.304917	0.978127	2.576	2.73e-17	5.81e-16	-0.777555	0.0356091	1	-0.602202	0.100429	1	1.753	1.967	2.817	3.41	3.74	19.96
14129	Fcgr1	NM_010186	chr3	96086832	96097892	-	2581	1	Fcgr1|AI323638|AV092959|CD64|FcgammaRI|IGGHAFC|-|3 F2.1|3 41.72 cM|protein-coding	0.409495	1	1	0.425179	0.772306	1	3.09842	5.75e-06	3.84e-05	0.274737	1	1	1.09528	0.363359	1	0.023	0.037	0.018	0.025	0.025	0.191
14130	Fcgr2b	NM_001077189	chr1	172890689	172906202	-	1537	1	Fcgr2b|AI528646|CD32|F630109E10Rik|Fc[g]RII|FcgRII|Fcgr2|Fcgr2a|Fcr-2|Fcr-3|Ly-17|Ly-m20|LyM-1|Lym-1|fcRII|-|1 H3|1 78.02 cM|protein-coding	2.03657	1.08e-11	3.34e-09	2.42439	3.3e-10	1.82e-08	2.24661	2.25e-17	4.81e-16	-3.44132	4.75e-11	4.96e-08	-3.14643	2.54e-09	2.11e-06	0.051	0.052	0.505	2.095	2.938	2.949
14131	Fcgr3	NM_010188	chr1	172981300	172989534	-	1346	1	Fcgr3|CD16|-|1 H3|1 78.8 cM|protein-coding	2.74532	0.00102778	0.0452657	2.76486	0.0159016	0.13555	3.47297	1.34e-06	9.88e-06	-3.76201	0.294533	1	-1.35707	0.664412	1	0	0.009	0.026	0.195	0.218	0.366
14132	Fcgrt	NM_010189	chr7	52348363	52359192	-	1729	1	Fcgrt|FcRn|-|7 B4|7 29.12 cM|protein-coding	1.30083	0.704458	1	3.07385	0.00312672	0.03713	3.73945	4.33e-06	2.95e-05	-0.0555525	1	1	1.47355	0.322381	1	0.014	0.042	0.014	0.038	0.125	0.236
319262	Fchsd1	NM_175684	chr18	38117088	38129385	-	4205	1	Fchsd1|A030002D08Rik|-|18|18 B3|protein-coding	0.503136	0.0179134	0.405233	0.966022	0.000810164	0.0120931	1.36214	1.34e-10	1.63e-09	0.180578	0.432324	1	0.373691	0.0927534	1	0.725	0.804	0.618	0.903	1.197	1.836
69169	Fcmr	NM_026976	chr1	132762354	132777367	+	1481	1	Fcmr|1810037B05Rik|Faim3|FcmuR|Toso|-|1|1 E4|protein-coding	3.09272	6.8e-06	0.000648581	6.13243	2.35e-32	9.91e-30	7.19477	5.69e-72	9.56e-70	-0.0530823	1	1	0.781789	0.576009	1	0.032	0.057	0.032	0.3	2.315	5.754
98752	Fcrla	NR_027666	chr1	172847725	172857714	-	1722	1	Fcrla|BB219290|FCRL|FCRL1|FREB|Fcrlm1|Fcrx|Freb1|mFREB|mFcrX|-|1|1 H3|protein-coding	4.47745	9.29e-07	0.00010961	6.41325	6.21e-18	8.38e-16	8.15245	1.13e-42	8.01e-41	1.33746	0.647246	1	2.05326	0.255896	1	0.021	0.037	0.007	0.199	0.726	2.947
110196	Fdps	NM_001253751	chr3	88897510	88905889	-	1448	1	Fdps|6030492I17Rik|AI256750|Fdpsl1|mKIAA1293|-|3 F1|3 39.01 cM|protein-coding	-0.106511	0.516594	1	-0.00892424	0.972737	1	-1.25685	1.05e-13	1.71e-12	-0.197339	0.222209	1	-0.173922	0.295695	1	264.808	268.105	290.039	280.919	285.234	141.733
14148	Fdx1	NM_007996	chr9	51751130	51771707	-	1206	1	Fdx1|-|-|9|9 B|protein-coding	-0.197608	0.342642	1	0.0331185	0.913	1	-1.05455	3.34e-07	2.69e-06	-0.296372	0.128555	1	-0.274769	0.164767	1	23.239	23.309	26.949	24.283	25.454	15.334
14149	Fdxr	NM_007997	chr11	115129339	115138283	-	1852	1	Fdxr|-|-|11|11 E2|protein-coding	-0.130104	0.421133	1	-0.871124	0.000438814	0.00718396	-1.12634	1.95e-10	2.33e-09	-0.0172166	0.918069	1	0.0107311	0.947861	1	9.644	9.543	9.368	8.923	5.094	4.981
225020	Fez2	NM_199448	chr17	78777218	78817492	-	1957	1	Fez2|9030616F16|D17Ertd315e|-|17 E3|17 48.57 cM|protein-coding	0.629967	0.000136113	0.00843587	1.81607	1.78e-13	1.55e-11	2.693	2e-57	2.22e-55	-0.233141	0.172693	1	-0.11295	0.545446	1	4.114	4.423	4.52	7.303	16.323	34.951
233081	Ffar1	NM_194057	chr7	31645587	31646489	-	901	1	Ffar1|Gpr40|-|7|7 B1|protein-coding	1.75168	0.0415107	0.688419	1.46379	0.0855093	0.454518	2.56787	0.000133439	0.000699847	0.763976	0.454409	1	0.272225	1	1	0.118	0.08	0.065	0.237	0.184	0.468
233079	Ffar2	NM_146187	chr7	31603376	31608794	-	2287	1	Ffar2|GPCR43|Gpr43|-|7|7 B1|protein-coding	-0.071675	0.910822	1	-0.637539	0.323478	1	4.33864	4.91e-28	1.9e-26	-2.86966	0.00052128	0.0878908	-1.95686	0.00696379	0.421809	0.019	0.044	0.191	0.164	0.107	4.061
30938	Fgd3	NM_015759	chr13	49358479	49404577	-	3090	1	Fgd3|5830461L01Rik|ZFYVE5|-|13 A5|13 25.18 cM|protein-coding	0.0854923	0.690027	1	0.284299	0.363492	1	1.89371	1.27e-22	3.78e-21	0.152743	0.464352	1	0.0101426	0.951267	1	1.531	1.353	1.331	1.463	1.658	5.716
13998	Fgd6	NM_053072	chr10	93498746	93608084	+	8021	1	Fgd6|AA123052|Etohd4|ZFYVE24|-|10|10 C3|protein-coding	0.373558	0.0971278	1	0.757961	0.0112442	0.103717	1.32064	1.12e-09	1.23e-08	0.205966	0.35891	1	0.17519	0.466701	1	0.452	0.438	0.38	0.504	0.636	1.092
14164	Fgf1	NM_010197	chr18	38998327	39078353	-	3903	1	Fgf1|Dffrx|Fam|Fgf-1|Fgfa|-|18 B3|18 20.74 cM|protein-coding	2.47747	1	1	7.0282	1.09e-07	4.01e-06	10.1103	3.19e-50	2.94e-48	0	1	1	0	1	1	0	0	0	0.004	0.101	0.98
14166	Fgf11	NM_010198	chr11	69609570	69615218	-	2610	1	Fgf11|Fgf-11|Fhf-3|Fhf3|-|11|11 B4|protein-coding	0.365545	0.417048	1	0.208555	0.78978	1	1.35341	0.000132261	0.000693971	-0.193779	0.666771	1	0.250882	0.693083	1	0.135	0.196	0.149	0.208	0.177	0.468
56636	Fgf21	NM_020013	chr7	52869260	52870860	-	942	1	Fgf21|-|-|7|7 B2|protein-coding	-1.342	0.000117205	0.00741689	-2.53607	9.44e-08	3.52e-06	-3.34152	1.21e-13	1.97e-12	-0.484786	0.106069	1	-0.0450603	0.929412	1	1.087	1.436	1.447	0.593	0.244	0.164
14178	Fgf7	NM_008008	chr2	125860394	125916921	+	2666	1	Fgf7|Kgf|-|2|2 F-G|protein-coding	0.495262	0.53715	1	0.391124	0.690262	1	2.17986	1.75e-07	1.47e-06	-1.77879	0.0276231	1	-0.193255	0.747682	1	0.022	0.068	0.075	0.111	0.1	0.401
14181	Fgfbp1	NM_001271616	chr5	44370097	44373038	-	1243	1	Fgfbp1|FGF-BP|FGF-BP1|FGFBP-1|-|5|5 B3|protein-coding	-1.94185	3.91e-06	0.000390292	-4.46903	1.03e-10	6.12e-09	-8.28096	9.63e-18	2.11e-16	-0.320729	0.469717	1	-0.382148	0.24504	1	0.65	0.617	0.768	0.207	0.032	0
14182	Fgfr1	NM_001079908	chr8	26629231	26686190	+	4999	1	Fgfr1|AW208770|Eask|FLG|Fgfr-1|Flt-2|Hspy|MFR|bFGF-R-1|c-fgr|-|8 A2|8 14.12 cM|protein-coding	1.21082	1	1	2.37226	0.227538	0.835171	3.73015	0.00114678	0.00500939	-0.0616982	1	1	0.0465515	1	1	0.002	0.002	0.002	0.007	0.013	0.045
75296	Fgfr1op	NM_001197046	chr17	8358383	8389335	+	3139	1	Fgfr1op|4930553O10Rik|FOP|-|17|17 A1|protein-coding	-0.239172	0.128718	1	-0.550298	0.0278713	0.205526	-1.1464	5.84e-13	9.01e-12	0.042594	0.78213	1	0.027861	0.862902	1	23.093	22.697	21.543	18.942	14.197	11.337
14191	Fgr	NM_010208	chr4	132530010	132557797	+	3327	1	Fgr|-|-|4 D2.3|4 66.11 cM|protein-coding	0.108889	0.686646	1	-0.950142	0.00836101	0.0825019	-1.5955	6.27e-07	4.85e-06	0.155393	0.568736	1	-0.147773	0.5721	1	0.523	0.421	0.452	0.504	0.226	0.173
229474	Fhdc1	NM_001033301	chr3	84246118	84284361	-	5916	1	Fhdc1|6330505N24Rik|Gm126|-|3|3 F1|protein-coding	0.666552	0.0281886	0.544896	-0.15197	0.710039	1	1.18076	5.7e-05	0.000319092	0.282813	0.385436	1	0.411044	0.171196	1	0.163	0.176	0.129	0.211	0.119	0.34
14198	Fhit	NM_010210	chr14	10382608	11994549	-	979	1	Fhit|AW045638|Fra14A2|-|14 5.61 cM|14 A2|protein-coding	-0.306683	0.39882	1	0.570602	0.172904	0.717981	2.03339	2.86e-13	4.53e-12	0.00207318	1	1	-0.305865	0.370235	1	0.769	0.617	0.732	0.621	1.107	3.519
14200	Fhl2	NM_010212	chr1	43179916	43220806	-	1558	1	Fhl2|FHL-2|SLIM-3|SLIM3|-|1|1 B|protein-coding	0.331983	1	1	0.2497	1	1	4.05701	9.39e-05	0.00050558	-0.0368682	1	1	-2.301	1	1	0.008	0	0.008	0.012	0.009	0.19
234686	Fhod1	NM_177699	chr8	107853060	107871870	-	3924	1	Fhod1|BC017144|FHOS|FHOS1|-|8|8 D3|protein-coding	0.263211	0.126721	1	0.236073	0.368179	1	1.23296	3.92e-12	5.59e-11	0.0936366	0.60945	1	0.026605	0.881202	1	3.547	3.322	3.217	3.989	3.821	8.723
60530	Fignl1	NM_001163359	chr11	11700291	11708965	-	2969	1	Fignl1|-|-|11|11 A2|protein-coding	0.134034	0.39656	1	-0.246961	0.32805	1	-1.18006	5.69e-14	9.5e-13	0.0665944	0.669778	1	0.0134744	0.935469	1	23.893	22.863	21.886	24.798	18.552	11.245
70598	Filip1	NM_001081243	chr9	79663369	79825689	-	4199	1	Filip1|5730485H21Rik|AI843021|-|9|9 E2|protein-coding	0.544762	0.482041	1	0.749883	0.335757	1	5.26937	3.39e-45	2.68e-43	1.27828	0.0158842	0.907284	0.733202	0.181217	1	0.092	0.06	0.036	0.055	0.058	1.658
78749	Filip1l	NM_001177871	chr16	57549355	57572917	+	3249	1	Filip1l|4631422O05Rik|Doc1|-|16|16 C1.1|protein-coding	0.844696	2.33e-05	0.00184818	1.34073	3.69e-06	0.000101339	1.66138	4.12e-16	8.07e-15	-0.0911489	0.67003	1	-0.119873	0.587996	1	1.521	1.461	1.566	2.865	4.041	5.709
103012	Firre	NR_015505	chrX	47916297	47988498	-	5795	1	Firre|5830467J12Rik|6720401G13Rik|AW048145|-|X|X A5|ncRNA	0.27559	0.275904	1	-0.000152129	1	1	1.41252	2.84e-09	2.96e-08	0.0109703	0.975984	1	0.259562	0.345248	1	0.934	1.057	0.911	1.135	0.891	2.771
66120	Fkbp11	NM_024169	chr15	98554799	98558629	-	728	1	Fkbp11|1110002O23Rik|FKBP-11|-|15|15 F2|protein-coding	-0.547371	0.741275	1	0.212377	1	1	2.64914	1.56e-05	9.72e-05	0.336329	0.807182	1	0.749426	0.382618	1	0.129	0.166	0.097	0.068	0.105	0.734
30795	Fkbp3	NM_013902	chr12	66163419	66174925	-	936	1	Fkbp3|25kDa|FKBP-3|FKBP25|-|12|12 C3|protein-coding	-0.236961	0.255104	1	-0.0628325	0.854262	1	-1.09721	1.02e-07	8.86e-07	-0.204349	0.30455	1	-0.259028	0.198181	1	111.376	105.508	121.044	106.494	104.559	66.948
14228	Fkbp4	NM_010219	chr6	128380125	128388649	-	2155	1	Fkbp4|59kDa|AL022792|AW208983|FKBP-4|FKBP-52|FKBP52|FKPB52|p59|-|6|6 F3|protein-coding	-0.0398802	0.809008	1	-0.451048	0.0854155	0.454221	-1.07567	1.28e-10	1.56e-09	-0.066268	0.682589	1	-0.00810704	0.960883	1	192.276	197.711	192.031	194.227	136.91	106.426
14229	Fkbp5	NM_010220	chr17	28535698	28623094	-	3871	1	Fkbp5|D17Ertd592e|Dit1|FKBP-5|FKBP51|-|17 A3.3|17 14.66 cM|protein-coding	-0.464485	0.00713346	0.205189	-1.89754	1.74e-12	1.31e-10	-2.47553	5.78e-35	3.09e-33	0.0747285	0.643603	1	0.0889561	0.602964	1	151.822	153.746	139.106	105.565	36.779	28.816
14251	Flot1	NM_008027	chr17	35960302	35969732	+	1679	1	Flot1|reggie-2|-|17|17 B1|protein-coding	0.489326	0.00405566	0.131437	1.62166	3.46e-11	2.21e-09	2.02733	3.27e-35	1.77e-33	-0.191964	0.247547	1	-0.155725	0.360516	1	6.713	6.799	7.344	10.596	22.474	34.859
71436	Flrt3	NM_001172160	chr2	140483934	140497212	-	4532	1	Flrt3|5530600M07Rik|C430047I10Rik|mKIAA1469|-|2|2 F3|protein-coding	5.13e-15	1	1	5.13e-15	1	1	7.239	8.14e-10	9.05e-09	3.15176	0.534563	1	0	1	1	0.006	0	0	0	0	0.131
22379	Fmnl3	NM_011711	chr15	99147643	99200913	-	4407	1	Fmnl3|2700073B04Rik|FBP11|Wbp3|mKIAA2014|-|15|15 F3|protein-coding	-0.229668	0.192909	1	-0.995538	0.0014794	0.0200763	-1.58016	6.05e-16	1.17e-14	-0.0682455	0.702264	1	-0.192505	0.295238	1	3.182	2.834	3.227	2.839	1.701	1.244
63828	Fn3k	NM_001038699	chr11	121296267	121304819	+	3850	1	Fn3k|2310074G21Rik|-|11|11 E2|protein-coding	0.916377	1	1	1.60087	0.34936	1	3.46187	0.00029196	0.00143193	0.479224	1	1	0.907141	0.708348	1	0.024	0.036	0.024	0	0.077	0.211
319448	Fndc3a	NM_207636	chr14	72937760	73109810	-	6108	1	Fndc3a|1700094E19Rik|D14Ertd453e|F730017H24Rik|Fndc3|sys|-|14 D2|14 37.62 cM|protein-coding	0.243931	0.212044	1	0.573791	0.0392131	0.262921	1.26	5.07e-11	6.45e-10	0.147069	0.452001	1	0.0336157	0.867107	1	1.957	1.776	1.717	2.07	2.58	4.724
14275	Folr1	NM_001252554	chr7	109006845	109019302	-	1298	1	Folr1|FBP1|Folbp-1|Folbp1|-|7|7 E3|protein-coding	3.32838	0.535895	1	7.35401	3.39e-09	1.64e-07	5.51732	0.00312308	0.0124236	0	1	1	0	1	1	0	0	0	0.025	0.373	0.119
14281	Fos	NM_010234	chr12	86814851	86818219	+	2087	1	Fos|D12Rfj1|c-fos|cFos|-|12 D2|12 39.7 cM|protein-coding	1.22186	0.00834347	0.22956	1.43797	0.0130844	0.116473	2.24308	7e-10	7.83e-09	-0.340488	0.668991	1	0.549765	0.38993	1	0.101	0.197	0.124	0.307	0.36	0.687
14284	Fosl2	NM_008037	chr5	32438845	32460212	+	5857	1	Fosl2|Fra-2|-|5 B1|5 17.33 cM|protein-coding	1.973	3.57e-25	6.4e-22	3.79791	1.3e-37	7.3e-35	4.83891	1.54e-136	6.72e-134	-0.356602	0.113664	1	-0.447117	0.0787341	1	0.368	0.332	0.454	1.839	6.477	15.069
64290	Foxb1	NM_022378	chr9	69605517	69608747	-	2980	1	Foxb1|C43|Fkh5|Foxb1a|Foxb1b|Hfh-e5.1|Mf3|Twh|-|9 D|9 38.76 cM|protein-coding	-0.89014	0.000345046	0.0186039	-2.2847	2.51e-09	1.24e-07	-2.80197	2.32e-23	7.16e-22	0.0685712	0.755423	1	-0.178387	0.394283	1	1.275	1.062	1.168	0.668	0.222	0.193
17301	Foxd2	NM_008593	chr4	114578885	114581503	-	2616	1	Foxd2|AI426778|Mf2|-|4 D1|4 52.73 cM|protein-coding	-0.308273	0.0859902	1	-1.05837	0.00015823	0.00302221	-1.12258	1.89e-07	1.58e-06	0.15642	0.372659	1	0.197393	0.299438	1	4.556	4.502	3.905	3.275	1.793	2.091
100040736	Foxd2os	NR_030721	chr4	114581894	114593723	+	2872	1	Foxd2os|9130206I24Rik|-|4|4 D1|ncRNA	-0.174702	0.277025	1	-0.771503	0.00717299	0.0731809	-1.95483	2.69e-26	9.49e-25	0.0728979	0.648619	1	0.0657553	0.690053	1	12.196	11.76	11.075	10.254	5.939	3.334
15223	Foxj1	NM_008240	chr11	116192018	116196668	-	2573	1	Foxj1|FKHL-13|HFH-4|Hfh4|-|11 E2|11 81.16 cM|protein-coding	-0.555607	0.0206054	0.446798	-1.76599	1.5e-06	4.42e-05	-1.77336	1.57e-09	1.69e-08	0.118744	0.5943	1	0.02324	0.933354	1	1.207	1.113	1.074	0.754	0.297	0.361
60611	Foxj2	NM_021899	chr6	122770202	122795384	+	5000	1	Foxj2|Fhx|-|6|6 F2|protein-coding	0.133775	0.494314	1	0.312792	0.312209	0.983971	1.18408	9.25e-09	9.12e-08	0.226639	0.239286	1	0.157662	0.452673	1	2.638	2.404	2.189	2.476	2.822	5.704
56458	Foxo1	NM_019739	chr3	52072259	52154031	+	5547	1	Foxo1|AI876417|Afxh|FKHR|Fkhr1|Foxo1a|-|3 C|3 23.19 cM|protein-coding	1.00911	4.17e-09	8.49e-07	1.5925	2.27e-08	9.26e-07	1.83395	7.22e-26	2.5e-24	0.213954	0.191334	1	0.155408	0.352365	1	6.569	6.167	5.486	11.264	17.048	22.54
114142	Foxp2	NM_212435	chr6	15135506	15391977	+	6404	1	Foxp2|2810043D05Rik|AI449000|CAG-16|D0Kist7|-|6|6 A2|protein-coding	2.55985	1	1	2.30759	1	1	7.07338	1.58e-08	1.51e-07	4.61467	0.04237	1	4.66917	0.0434236	1	0.011	0.011	0	0.003	0.002	0.072
382074	Foxr1	NM_001033469	chr9	44242317	44248951	-	1659	1	Foxr1|Foxn5|Gm1115|-|9 24.84 cM|9 B|protein-coding	5.13e-15	1	1	5.13e-15	1	1	6.50113	8.97e-06	5.81e-05	0	1	1	2.27926	1	1	0	0.007	0	0	0	0.186
239554	Foxred2	NM_001168260	chr15	77770952	77787152	-	4880	1	Foxred2|A430097D04Rik|D15Bwg0759e|Gm304|-|15 E1|15 36.92 cM|protein-coding	-0.486729	0.347361	1	-0.721754	0.253658	0.884311	3.33759	1.64e-26	5.82e-25	0.196023	0.752834	1	0.422343	0.368785	1	0.089	0.099	0.074	0.055	0.045	0.876
14287	Fpgs	NM_010236	chr2	32538129	32549695	-	2246	1	Fpgs|AA408187|-|2 B|2 22.09 cM|protein-coding	-0.0396141	0.799444	1	-1.09319	5.47e-06	0.000143872	-1.24885	3.07e-15	5.61e-14	0.0319627	0.833662	1	0.102134	0.511332	1	18.875	19.583	17.71	17.973	8.185	8.672
14296	Frat1	NM_008043	chr19	41904460	41907073	+	2611	1	Frat1|AW060382|-|19 C3|19 35.3 cM|protein-coding	0.199275	0.541631	1	0.0162822	0.958892	1	1.48418	2.47e-08	2.31e-07	-0.00623077	1	1	-0.434977	0.308334	1	0.356	0.25	0.342	0.409	0.332	1.12
209630	Frmd4a	NM_001177844	chr2	4480800	4535089	+	5802	1	Frmd4a|2700017I06Rik|5330420J21|AI594879|C230040M21Rik|Frmd4|Gm13190|OTTMUSG00000010806|mKIAA1294|-|2|2 A1|protein-coding	-0.164078	0.349459	1	-0.768862	0.0197034	0.159531	-1.45854	7.8e-15	1.39e-13	-0.206531	0.230757	1	-0.292464	0.117309	1	3.618	3.433	4.044	3.715	2.549	1.694
232288	Frmd4b	NM_145148	chr6	97236861	97567651	-	5004	1	Frmd4b|6030440G05Rik|C87375|GOBLIN|GRSP1|R74720|mKIAA1013|-|6|6 D3|protein-coding	0.561387	0.553696	1	2.53524	0.000233937	0.00420755	6.17905	1.28e-56	1.4e-54	0.311082	0.703126	1	-0.479702	0.658473	1	0.031	0.017	0.023	0.036	0.153	2.026
385354	Frmd7	NM_001190332	chrX	48245822	48295887	-	4634	1	Frmd7|EG665849|Gm1533|-|X|X A5|protein-coding	-0.200086	0.3759	1	-0.77974	0.0198274	0.160158	-1.69964	7.67e-11	9.56e-10	-0.361495	0.136621	1	-0.479208	0.0369834	1	0.518	0.467	0.634	0.575	0.352	0.228
666060	Frmpd1	NM_001081172	chr4	45197778	45298808	+	4794	1	Frmpd1|BC031840|mKIAA0967|-|4|4 B1|protein-coding	-1.15583	0.125716	1	-3.51469	0.00226338	0.0284662	-6.74555	2.83e-05	0.000167829	-0.812515	0.283814	1	-1.53845	0.0517007	1	0.039	0.023	0.069	0.031	0.005	0
333605	Frmpd4	NM_001290428	chrX	163909238	164293009	-	8137	1	Frmpd4|Gm196|PKAP1|Pdzd10|Pdzk10|Preso1|preso|-|X|X F5|protein-coding	5.13e-15	1	1	5.13e-15	1	1	5.62642	0.00341044	0.0134554	0	1	1	0	1	1	0	0	0	0	0	0.021
107971	Frs3	NM_144939	chr17	47832156	47841235	+	2126	1	Frs3|4930417B13Rik|AI449674|Frs2beta|Snt2|-|17|17 C|protein-coding	0.478301	0.0525571	0.786459	0.806196	0.0106209	0.0994672	1.11866	5.87e-06	3.91e-05	0.136127	0.633126	1	0.328184	0.267007	1	0.758	0.813	0.663	0.959	1.121	1.673
320365	Fry	NM_172887	chr5	151062505	151300328	+	10667	1	Fry|13CDNA73|9330186A19Rik|AF346502|AI462658|C87180|D930046M03|cg003|mKIAA4143|-|5 G3|5 89.36 cM|protein-coding	0.0449129	0.835337	1	-1.73722	1.26e-08	5.47e-07	-2.12798	5.6e-18	1.25e-16	-0.783448	0.000341171	0.0651122	-0.845589	0.000154359	0.0254238	0.558	0.53	0.936	0.994	0.274	0.245
623046	Fscb	NM_001163271	chr12	65572320	65575885	-	3563	1	Fscb|EG623046|-|12|12 C1|protein-coding	2.56128	1	1	3.8711	0.311744	0.983279	5.51492	0.00240679	0.00977801	0	1	1	0	1	1	0	0	0	0.005	0.011	0.043
238021	Fscn2	NM_172802	chr11	120222848	120229487	+	1711	1	Fscn2|A930022G03|Ahl8|C630046B20Rik|-|11|11 E2|protein-coding	-0.48602	1	1	0.0670895	1	1	2.89672	0.00323104	0.0128107	2.14372	0.0568959	1	0.0347599	1	1	0.069	0.014	0.014	0.01	0.015	0.132
83554	Fstl3	NM_031380	chr10	79240019	79245375	+	1946	1	Fstl3|E030038F23Rik|Flrg|-|10|10 C1|protein-coding	-0.188936	0.306946	1	-1.7647	1.79e-10	1.04e-08	-2.01259	6.69e-23	2.01e-21	-0.179437	0.304908	1	-0.140564	0.441454	1	4.734	4.761	5.122	4.639	1.507	1.481
320027	Fstl4	NM_177059	chr11	52578208	53000849	+	3099	1	Fstl4|B230374F23Rik|SPIG1|mKIAA1061|-|11|11 B1.3|protein-coding	-0.582732	0.293716	1	-2.8576	0.00152675	0.020591	-6.69683	3.49e-07	2.8e-06	-0.434093	0.35639	1	-0.088343	1	1	0.076	0.094	0.099	0.069	0.012	0
78878	Ftx	NR_028380	chrX	100764844	100819093	-	4358	1	Ftx|B230206F22Rik|BB219131|NCRNA00182|Thcytx|-|X D|X 46.21 cM|ncRNA	0.830786	9.04e-06	0.000826976	1.61706	1.32e-08	5.68e-07	2.78459	4.37e-51	4.11e-49	0.294129	0.15682	1	0.303108	0.137686	1	1.239	1.206	0.976	1.792	2.808	7.79
71665	Fuca1	NM_024243	chr4	135476641	135496215	+	2513	1	Fuca1|0610006A03Rik|9530055J05Rik|Afuc|Fuca|-|4 D3|4 68.01 cM|protein-coding	0.208108	0.213214	1	1.66208	1.89e-10	1.09e-08	1.58364	6.66e-19	1.58e-17	-0.121942	0.463345	1	-0.0335269	0.842968	1	10.31	10.777	10.678	12.857	33.623	37.56
18550	Furin	NM_011046	chr7	87534080	87547698	-	4318	1	Furin|9130404I01Rik|Fur|PACE|Pcsk3|SPC1|-|7 45.65 cM|7 D1-E2|protein-coding	0.0988599	0.527719	1	0.466588	0.0563509	0.340984	1.18279	1.24e-13	2.02e-12	0.0622708	0.688401	1	-0.027034	0.881898	1	6.08	5.506	5.601	6.177	7.763	14.574
14343	Fut1	NM_008051	chr7	52872976	52876429	+	2576	1	Fut1|-|-|7 B4|7 29.39 cM|protein-coding	0.242897	0.688853	1	-1.32659	0.0534028	0.329192	-3.44535	4.01e-05	0.000231061	-0.686657	0.268053	1	-0.289172	0.793474	1	0.073	0.094	0.114	0.14	0.045	0.011
14345	Fut4	NM_010242	chr9	14552903	14556566	-	3661	1	Fut4|AI451562|CD15|FAL|FucT-IV|LeX|SSEA-1|Ssea1|-|9 A2|9 4.3 cM|protein-coding	-0.223868	0.160257	1	-0.56502	0.0197166	0.159584	-1.3516	3.66e-13	5.73e-12	-0.204255	0.186534	1	-0.210755	0.182419	1	6.225	6.134	6.893	6.077	4.676	3.131
14347	Fut7	NM_013524	chr2	25279214	25281893	+	1964	1	Fut7|AI853193|FTVII|Fuc-TVII|FucT-VII|-|2|2 A3|protein-coding	-1.66796	4.62e-06	0.000451821	-2.54636	2.04e-07	7.16e-06	-1.98443	2.93e-07	2.38e-06	0.262829	0.38031	1	-0.0423427	0.917153	1	0.816	0.646	0.641	0.206	0.109	0.192
14297	Fxn	NM_008044	chr19	24335943	24355076	-	1088	1	Fxn|FA|FARR|Frda|X25|-|19|19 C1|protein-coding	-0.178538	0.343665	1	-0.179964	0.598686	1	-1.4594	3.65e-13	5.72e-12	-0.232361	0.211401	1	-0.265315	0.165332	1	26.69	25.393	29.677	27.672	23.305	12.718
23880	Fyb	NM_011815	chr15	6529847	6615608	+	4977	1	Fyb|ADAP|B630013F22Rik|FYB-120/130|Slap130|p120/130|p120/p130|-|15|15 A1|protein-coding	-0.0147379	0.930554	1	-0.965183	0.000414801	0.00683669	-1.81137	1.23e-25	4.23e-24	-0.331845	0.0332413	1	-0.405704	0.0115565	0.597632	6.832	6.432	8.299	8.458	4.424	2.729
14360	Fyn	NM_008054	chr10	39089605	39285180	+	3504	1	Fyn|AI448320|AW552119|-|10 B1|10 20.51 cM|protein-coding	0.194663	0.216419	1	1.4434	2.27e-08	9.26e-07	1.36606	1.09e-15	2.08e-14	-0.0782297	0.608407	1	-0.137807	0.37414	1	10.621	10.053	10.741	12.661	29.469	32.287
14366	Fzd4	NM_008055	chr7	96552876	96558620	+	3681	1	Fzd4|Fz4|-|7 E1|7 49.32 cM|protein-coding	-1.06586	7.9e-08	1.19e-05	-1.66501	1.01e-09	5.19e-08	-2.0805	2.47e-23	7.59e-22	0.0349896	0.844252	1	-0.0429234	0.820447	1	3.804	3.607	3.592	1.791	1.108	0.978
619312	G730013B05Rik	NR_040379	chr16	50528615	50559572	+	2727	1	G730013B05Rik|linc-Cblb|linc1610|-|-|ncRNA	5.13e-15	1	1	4.67092	0.0833119	0.446304	5.22443	0.0102584	0.0363741	0	1	1	0	1	1	0	0	0	0	0.024	0.048
210710	Gab3	NM_181584	chrX	72233887	72330244	-	2114	1	Gab3|5930433H21Rik|-|X|X A7.3|protein-coding	0.176274	0.67496	1	1.09938	0.00535789	0.0575441	1.18524	6.01e-05	0.000335644	0.133976	0.711	1	0.283533	0.422454	1	0.362	0.394	0.317	0.373	0.7	0.838
216643	Gabrp	NM_146017	chr11	33450781	33478957	-	3268	1	Gabrp|-|-|11|11 A4|protein-coding	0.33242	1	1	5.61552	1.78e-07	6.31e-06	12.639	6.26e-240	1.16e-236	-2.32931	1	1	-2.30119	1	1	0	0	0.004	0.005	0.246	33.444
13197	Gadd45a	NM_007836	chr6	66985090	66987401	-	1218	1	Gadd45a|AA545191|Ddit1|GADD45|-|6|6 C1|protein-coding	0.971808	4.62e-08	7.41e-06	1.70495	4.66e-11	2.92e-09	2.2337	2.25e-36	1.27e-34	-0.253874	0.161995	1	-0.267844	0.143006	1	7.718	7.508	8.772	17.753	27.422	48.203
14419	Gal	NM_010253	chr19	3409917	3414457	-	692	1	Gal|Galn|-|19 A|19 3.16 cM|protein-coding	-0.364868	0.60178	1	-6.21156	8.8e-05	0.00179517	-3.91758	0.000201553	0.00102101	-0.397109	0.544276	1	-1.07322	0.0790965	1	0.255	0.157	0.323	0.261	0	0.02
330217	Gal3st4	NM_001033416	chr5	138706153	138713982	-	3157	1	Gal3st4|1500031A01Rik|-|5|5 G2|protein-coding	0.157769	0.642488	1	2.03666	1.63e-07	5.83e-06	1.55829	2.15e-08	2.02e-07	-0.2736	0.455779	1	-0.20407	0.719302	1	0.209	0.203	0.242	0.281	0.917	0.833
14635	Galk1	NM_016905	chr11	115869671	115874033	-	1496	1	Galk1|AA409894|GALK|Gk|Glk|Glk1|-|11 E2|11 80.91 cM|protein-coding	-0.190079	0.281523	1	-0.785965	0.00365341	0.042217	-1.26392	1.12e-12	1.7e-11	-0.076446	0.657286	1	0.0220988	0.901308	1	69.283	72.311	69.393	64.102	38.687	33.925
69976	Galk2	NM_001291002	chr2	125691959	125810034	+	2511	1	Galk2|2810017M24Rik|AI327030|Gk2|-|2|2 F1|protein-coding	0.317796	0.0423941	0.697298	1.67834	5.52e-11	3.4e-09	1.17625	1.43e-13	2.31e-12	-0.0333757	0.831489	1	-0.0369302	0.816265	1	11.569	11.512	11.328	14.59	36.193	29.845
319625	Galm	NM_176963	chr17	80526811	80584372	+	2236	1	Galm|A530057M15Rik|AU015645|AU020959|-|17|17 E3|protein-coding	2.14394	0.248481	1	0.850038	1	1	4.36959	7.67e-06	5.03e-05	1.325	0.657331	1	-0.0504005	1	1	0.016	0.005	0.005	0.029	0.011	0.157
231050	Galnt11	NM_144908	chr5	24728711	24771736	+	2527	1	Galnt11|A430075I06Rik|AI648252|E430002F06Rik|-|5|5 A3|protein-coding	0.0861382	0.631287	1	0.740341	0.00372808	0.0429765	1.0391	1.06e-08	1.04e-07	-0.00765845	0.978577	1	-0.0114617	0.967443	1	2.887	2.84	2.795	3.058	4.525	6.661
230145	Galnt12	NM_172693	chr4	47104825	47135914	+	2204	1	Galnt12|9130206E10|A630062B03Rik|-|4|4 B1|protein-coding	-0.089626	0.570404	1	-1.20842	6.54e-07	2.09e-05	-1.85695	2.36e-28	9.2e-27	0.0164598	0.917197	1	0.00716163	0.9664	1	19.213	18.756	18.164	17.719	7.785	5.845
108148	Galnt2	NM_139272	chr8	126755294	126869622	+	4092	1	Galnt2|AI480629|-|8|8 E2|protein-coding	0.281158	0.0753923	0.971054	1.26489	1.16e-06	3.53e-05	2.32702	3.04e-44	2.3e-42	0.049637	0.746604	1	-0.0262833	0.868217	1	18.796	17.488	17.447	22.029	42.036	101.652
14426	Galnt4	NM_015737	chr10	98570769	98575881	+	5110	1	Galnt4|AV011803|-|10|10 C3|protein-coding	0.443556	0.108126	1	0.678625	0.0478222	0.302388	1.92796	1.95e-14	3.37e-13	0.267871	0.330853	1	0.000522763	1	1	0.302	0.241	0.242	0.341	0.387	1.062
207839	Galnt6	NM_001161767	chr15	100520346	100559807	-	5684	1	Galnt6|4632410F13|AW047994|GalNAc-T6|-|15|15 F3|protein-coding	1.27945	0.0533514	0.792487	3.51471	4.94e-08	1.94e-06	2.37418	0.000128317	0.000674605	-1.92498	0.0383318	1	-2.09288	0.0326764	1	0.014	0.013	0.052	0.139	0.635	0.327
14429	Galr3	NM_015738	chr15	78872315	78873988	+	1241	1	Galr3|Galnr3|-|15 E1|15 37.7 cM|protein-coding	-0.38489	0.0527187	0.788388	-1.4851	1.68e-07	5.99e-06	-1.98897	4e-17	8.42e-16	-0.126979	0.489357	1	-0.0960941	0.624369	1	4.409	4.4	4.622	3.63	1.623	1.348
14432	Gap43	NM_008083	chr16	42248674	42340764	-	1296	1	Gap43|B-50|Basp2|GAP-43|-|16 B4|16 28.37 cM|protein-coding	-2.18551	1	1	0.0294986	1	1	4.48214	2.1e-06	1.5e-05	-2.36154	1	1	-2.34078	1	1	0	0	0.009	0	0.01	0.293
14433	Gapdh	NM_008084	chr6	125111870	125115791	-	1413	1	Gapdh|Gapd|-|6 F2|6 59.32 cM|protein-coding	-0.0651628	0.686864	1	-0.339615	0.195407	0.768737	-1.0147	2.99e-10	3.49e-09	-0.0287616	0.855506	1	-0.00638147	0.96877	1	318.884	322.803	311.274	311.405	248.914	179.646
68147	Gar1	NM_026578	chr3	129527830	129534314	-	1262	1	Gar1|AA409823|AI326794|C430047J18Rik|Nola1|-|3|3 G3|protein-coding	0.0323583	0.839341	1	-0.719034	0.00414441	0.0467829	-1.2133	4.25e-14	7.17e-13	-0.0122739	0.937424	1	0.0495199	0.757316	1	77.608	80.263	75.042	79.792	45.224	37.63
353172	Gars	NM_180678	chr6	54987995	55029498	+	2371	1	Gars|GENA202|Gena201|Nmf249|Sgrp23|-|6 B3|6 27.29 cM|protein-coding	0.0545964	0.736186	1	-0.412348	0.111962	0.539091	-1.20552	2.77e-13	4.4e-12	0.0926791	0.554684	1	0.173164	0.28582	1	138.131	145.115	124.625	134.596	93.237	62.579
14450	Gart	NM_010256	chr16	91621642	91647217	-	3303	1	Gart|Gaps|Prgs|-|16 53.18 cM|16 C3-C4|protein-coding	0.0350538	0.833639	1	-0.979688	0.000167033	0.00316271	-1.31734	2.75e-15	5.04e-14	0.0480489	0.762004	1	0.0469839	0.773764	1	78.893	78.095	73.571	78.631	36.97	34.128
14457	Gas7	NM_001109657	chr11	67400002	67502494	+	7089	1	Gas7|AW124766|B230343A10Rik|Gas7-cb|-|11|11 B3|protein-coding	-0.124102	0.779414	1	-1.87819	0.00150583	0.020366	-2.59991	6.87e-07	5.3e-06	-7.71444	1.66e-13	2.34e-10	-2.64372	7.38e-07	0.000308999	0	0.014	0.085	0.081	0.022	0.016
14462	Gata3	NM_008091	chr2	9778705	9800227	-	3207	1	Gata3|Gata-3|jal|-|2 A1|2 6.69 cM|protein-coding	-0.520301	0.00155779	0.0622988	-1.44093	5.08e-08	1.99e-06	-1.80227	6.03e-26	2.09e-24	-9.47e-05	1	1	-0.0521829	0.750565	1	50.803	47.752	49.025	35.46	18.122	16.238
230101	Gba2	NM_172692	chr4	43579800	43591736	-	3516	1	Gba2|F630034E04|-|4|4 B1|protein-coding	0.103969	0.530294	1	0.552939	0.0221933	0.173048	1.0996	1.38e-11	1.87e-10	0.0703711	0.663653	1	0.0718846	0.663749	1	5.866	5.758	5.386	6.014	7.832	13.347
107338	Gbf1	NM_178930	chr19	46227048	46361000	+	6359	1	Gbf1|1700083E03Rik|AI035702|AW049900|mKIAA0248|-|19|19 C3|protein-coding	0.896838	1.46e-06	0.000163101	1.65619	3.11e-07	1.05e-05	2.53681	6.09e-39	3.82e-37	0.0854672	0.634386	1	0.0462128	0.800195	1	13.687	13.028	12.547	24.019	41.584	83.595
14469	Gbp2	NM_010260	chr3	142283627	142300972	+	2442	1	Gbp2|-|-|3 H1|3 66.69 cM|protein-coding	0.107607	0.543974	1	0.536305	0.0569995	0.343957	1.38109	3.91e-15	7.08e-14	0.814781	0.000801556	0.120469	0.716318	0.00282442	0.231805	5.242	4.571	2.883	3.205	4.296	8.701
14468	Gbp2b	NM_010259	chr3	142257811	142282140	+	2807	1	Gbp2b|Gbp-1|Gbp1|Mag-1|Mpa-1|Mpa1|-|3 H1|3 66.69 cM|protein-coding	-0.199401	0.380972	1	0.381714	0.219316	0.821863	1.1972	3.43e-10	3.96e-09	0.800884	0.00481173	0.459158	0.727071	0.00752088	0.442187	3.664	3.223	2.014	1.798	2.752	5.406
17472	Gbp4	NM_001256005	chr5	105544786	105568605	-	4525	1	Gbp4|AW228052|Mag-2|Mpa-2|Mpa2|mKIAA4245|-|5 E5|5 50.68 cM|protein-coding	0.0619646	0.698881	1	0.379837	0.149812	0.658238	1.8006	3.59e-27	1.32e-25	0.348414	0.043218	1	0.225805	0.203442	1	8.567	7.483	6.515	6.943	8.731	26.234
76074	Gbp8	NM_029509	chr5	105443172	105482580	-	2447	1	Gbp8|5830443L24Rik|mGBP8|-|5|5 E5|protein-coding	-0.0520551	0.778572	1	0.0433055	0.880913	1	1.54447	2.2e-16	4.38e-15	0.104618	0.562545	1	0.062382	0.748763	1	4.005	3.712	3.593	3.575	3.73	12.12
236573	Gbp9	NM_172777	chr5	105507413	105539311	-	3620	1	Gbp9|-|-|5|5 E5|protein-coding	0.254053	0.132489	1	0.78905	0.00221077	0.0279507	2.28618	4.11e-39	2.59e-37	0.378919	0.0334493	1	0.32574	0.0860028	1	8.227	7.518	6.13	7.458	10.779	34.492
227960	Gca	NM_145523	chr2	62502384	62532166	+	3278	1	Gca|5133401E04Rik|AI573844|-|2|2 C1.3|protein-coding	0.0210096	0.950637	1	-1.12356	0.00204208	0.0261758	-2.66555	8.68e-16	1.66e-14	-0.689699	0.0152742	0.89283	-0.85378	0.00143959	0.148574	0.531	0.461	0.818	0.863	0.358	0.15
26912	Gcat	NM_001161712	chr15	78861304	78872961	+	1752	1	Gcat|AI526977|Kbl|-|15 E1|15 37.7 cM|protein-coding	-0.447721	0.0726375	0.948165	-1.19972	0.000292871	0.00510707	-2.03682	6.73e-13	1.03e-11	-0.133749	0.576697	1	-0.128865	0.645915	1	1.511	1.462	1.603	1.201	0.677	0.449
14528	Gch1	NM_008102	chr14	47773570	47809077	-	2756	1	Gch1|GTP-CH|GTPCH|Gch|-|14 24.6 cM|14 C2-3|protein-coding	0.858208	0.00184662	0.0711631	2.01952	2.83e-10	1.58e-08	2.93248	1.66e-21	4.59e-20	-0.802076	0.00863021	0.64251	-0.584949	0.0496847	1	0.337	0.386	0.559	1.044	2.262	5.046
103988	Gck	NM_010292	chr11	5800826	5850084	-	2715	1	Gck|GLK|Gk|Gls006|HK4|HKIV|HXKP|Hlb62|MODY2|-|11 A1|11 3.88 cM|protein-coding	0.706555	0.292675	1	3.86276	4.26e-11	2.7e-09	6.47434	2.57e-86	5.94e-84	-5.23687	0.00611752	0.531867	-5.20596	0.00654601	0.407803	0	0	0.04	0.063	0.665	4.531
14629	Gclc	NM_010295	chr9	77602342	77642296	+	3409	1	Gclc|D9Wsu168e|GLCL-H|Ggcs-hs|Glclc|-|9 43.36 cM|9 D-E|protein-coding	-0.12505	0.431484	1	-0.711392	0.00434966	0.0485591	-1.04625	2.42e-10	2.86e-09	0.0139969	0.929765	1	0.0219888	0.891815	1	24.202	24.093	23.043	21.927	13.847	12.92
14538	Gcnt2	NM_008105	chr13	40982127	41056261	+	4360	1	Gcnt2|5330430K10Rik|IGnT|IGnTA|IGnTB|IGnTC|-|13 20.12 cM|13 A5|protein-coding	-1.11988	0.429909	1	-0.833088	0.4045	1	2.18966	9.91e-05	0.00053104	-0.635704	0.640219	1	-1.12313	0.320007	1	0.016	0.011	0.024	0.011	0.015	0.132
14525	Gcsam	NM_001159297	chr16	45610553	45622980	+	3356	1	Gcsam|Gcet|Gcet2|M17|M17-L|-|16|16 B5|protein-coding	1.16548	1	1	-2.29617	1	1	4.47987	2.57e-06	1.81e-05	-2.36168	1	1	-2.34078	1	1	0	0	0.004	0.01	0	0.115
68133	Gcsh	NM_026572	chr8	119505728	119517349	-	1330	1	Gcsh|1100001L02Rik|5730591C18Rik|-|8|8 E1|protein-coding	-0.145968	0.406913	1	-0.4818	0.0766626	0.420508	-1.47397	1.86e-16	3.73e-15	-0.244678	0.161185	1	-0.134094	0.475386	1	40.137	43.779	45.125	42.641	30.749	19.096
14560	Gdf10	NM_145741	chr14	34736773	34748468	+	2504	1	Gdf10|Bmp3b|-|14 B|14 20.8 cM|protein-coding	5.13e-15	1	1	5.13e-15	1	1	5.86154	0.00107062	0.00469802	0	1	1	0	1	1	0	0	0	0	0	0.079
14561	Gdf11	NM_010272	chr10	128321602	128328774	-	1806	1	Gdf11|BMP-11|Bmp11|-|10|10 D3|protein-coding	0.164608	0.335692	1	1.38562	2.82e-07	9.64e-06	2.23115	8.98e-42	6.18e-40	-0.018696	0.918951	1	-0.000101169	0.998144	1	6.938	6.816	6.769	7.894	18.296	36.792
14563	Gdf5	NM_008109	chr2	155766761	155771100	-	2311	1	Gdf5|BMP-14|Cdmp-1|bp|brp|-|2 H1|2 77.26 cM|protein-coding	1.22623	1	1	2.58185	0.134247	0.606679	3.44401	0.00506584	0.019269	1.33426	0.647389	1	-2.30103	1	1	0.015	0	0.005	0.014	0.033	0.079
14567	Gdi1	NM_010273	chrX	71550351	71557206	+	2644	1	Gdi1|GDIA|GDIalpha|-|X 37.97 cM|X B-C1|protein-coding	0.146717	0.402933	1	0.817674	0.00114933	0.0162576	1.90458	6.96e-26	2.42e-24	0.109405	0.539717	1	0.191325	0.275248	1	11.357	11.701	10.229	11.561	17.642	44.034
276919	Gemin4	NM_177367	chr11	76024073	76031074	-	3444	1	Gemin4|4932415L08Rik|AU015359|-|11|11 B5|protein-coding	-0.0871052	0.613773	1	-0.890372	0.000610859	0.00955714	-1.00735	1.8e-09	1.93e-08	0.124383	0.442096	1	0.176629	0.28966	1	17.748	18.246	15.744	15.474	8.632	9.028
237221	Gemin8	NM_146238	chrX	162608386	162628444	+	1856	1	Gemin8|B130034M20Rik|B930082C09Rik|BC023488|gemin-8|-|X|X F5|protein-coding	-0.287081	0.107252	1	-0.66572	0.0129998	0.115995	-1.17022	1.37e-09	1.48e-08	0.0040522	1	1	0.00162524	1	1	4.159	4.166	3.971	3.402	2.425	2.053
14581	Gfi1	NM_010278	chr5	108145674	108153363	-	2853	1	Gfi1|AW495828|Gfi-1|Pal-1|Pal1|-|5 F|5 52.23 cM|protein-coding	-1.23477	2.52e-14	1.2e-11	-2.40684	5.21e-19	7.88e-17	-2.16235	5.09e-22	1.46e-20	0.110728	0.463982	1	0.123568	0.427407	1	15.34	15.132	13.637	6.01	2.395	3.505
56316	Ggcx	NM_019802	chr6	72364302	72381100	+	3306	1	Ggcx|-|-|6|6 C3|protein-coding	0.128561	0.553284	1	0.302615	0.290642	0.95893	1.01199	7.01e-06	4.61e-05	0.0340626	0.895277	1	0.219495	0.316887	1	1.064	1.169	1.006	1.119	1.215	2.34
243897	Ggn	NM_182694	chr7	29955229	29958952	+	2648	1	Ggn|AI593290|-|7|7 B1|protein-coding	0.492143	0.171162	1	-0.453142	0.339929	1	1.2033	5.83e-05	0.000325802	0.194057	0.609664	1	0.317937	0.504711	1	0.293	0.283	0.249	0.354	0.183	0.664
70772	Ggnbp1	NM_027544	chr17	27166204	27173323	+	1517	1	Ggnbp1|0610031G08Rik|mdf|-|17|17 A3.3|protein-coding	0.742342	0.282553	1	0.144419	1	1	1.64795	0.00445516	0.0171358	-0.173681	1	1	0.955302	0.129802	1	0.119	0.267	0.184	0.167	0.153	0.401
14594	Ggta1	NM_001145821	chr2	35255699	35316969	-	3564	1	Ggta1|AW108479|GALT|Gal|Ggta|Ggta-1|alpha Gal|alpha3GalT|-|2 B|2 23.6 cM|protein-coding	-0.864592	3.17e-07	4.28e-05	-1.62181	7.51e-11	4.52e-09	-2.42684	8.68e-42	5.99e-40	0.0948397	0.53463	1	0.0295278	0.852408	1	8.613	8.097	7.763	4.471	2.515	1.673
80860	Ghdc	NM_031871	chr11	100627646	100632271	-	2151	1	Ghdc|D11Lgp1e|-|11 D|11 63.6 cM|protein-coding	0.0794248	0.784665	1	0.9893	0.0018846	0.0246031	1.26567	2.82e-07	2.3e-06	0.0803135	0.777022	1	-0.0440523	0.882567	1	0.678	0.618	0.617	0.673	1.215	1.719
16205	Gimap1	NM_175860	chr6	48689046	48693794	+	1494	1	Gimap1|IAP38|Imap38|imap|-|6|6 B2.3|protein-coding	-2.79745	4.59e-08	7.41e-06	-3.09373	1.78e-07	6.32e-06	-1.48814	0.00316688	0.0125791	-0.678811	0.0640619	1	-1.03302	0.0106651	0.563655	0.441	0.332	0.669	0.099	0.077	0.282
107526	Gimap4	NM_174990	chr6	48634577	48642061	+	1805	1	Gimap4|AU019574|E430007K16Rik|Ian-1|Ian1|Imap4|-|6|6 B2.3|protein-coding	-0.960547	0.00103338	0.0454292	-2.84402	8.62e-10	4.49e-08	-3.73959	1.05e-19	2.61e-18	0.865379	0.00053999	0.0895527	0.610638	0.015937	0.72309	1.734	1.399	0.912	0.492	0.12	0.078
317757	Gimap5	NM_175035	chr6	48696196	48704199	+	1938	1	Gimap5|D630024P16|E230026N22Rik|-|6|6 B2.3|protein-coding	-1.38865	0.0241197	0.488914	-4.01517	5.33e-05	0.00114341	-3.58897	7.45e-06	4.89e-05	-0.457531	0.333116	1	-1.24589	0.042893	1	0.182	0.1	0.237	0.093	0.013	0.022
231931	Gimap6	NM_153175	chr6	48651582	48658243	-	1607	1	Gimap6|4833419H03Rik|Ian6|mFLJ00102|-|6|6 B2.3|protein-coding	-1.80539	3.65e-07	4.85e-05	-3.32832	4.66e-10	2.52e-08	-2.1103	2.32e-07	1.91e-06	-0.402913	0.238482	1	-0.596059	0.06145	1	0.945	0.797	1.185	0.358	0.111	0.324
231932	Gimap7	NM_146167	chr6	48668620	48674635	+	1265	1	Gimap7|IAN7|Ian3|-|6|6 B2.3|protein-coding	-1.01223	0.0386962	0.66609	-5.00458	4.58e-10	2.48e-08	-3.41399	7.13e-10	7.97e-09	0.406437	0.293679	1	-0.120029	0.799313	1	1.014	0.668	0.725	0.364	0.02	0.078
243374	Gimap8	NM_001077410	chr6	48597233	48610874	+	3646	1	Gimap8|Gm457|IAN9|IMAP8|-|6|6 B2.3|protein-coding	-1.19184	9.33e-05	0.00612156	-4.27127	1.48e-15	1.6e-13	-5.31298	1.14e-24	3.78e-23	0.385619	0.133283	1	0.0185008	0.933892	1	0.581	0.434	0.429	0.194	0.021	0.012
69270	Gins1	NM_027014	chr2	150735330	150757016	+	1078	1	Gins1|2810418N01Rik|Gins4|PSF1|mKIAA0186|-|2|2 H1|protein-coding	0.0565599	0.735663	1	0.171969	0.494702	1	-1.13898	7.12e-11	8.9e-10	-0.0471479	0.779085	1	0.0146259	0.93694	1	29.997	32.125	30.465	33.377	32.22	16.712
272551	Gins2	NM_178856	chr8	123105166	123112975	-	1031	1	Gins2|2210013I18Rik|4833427B12Rik|AI323585|Pfs2|-|8|8 E1|protein-coding	-0.299904	0.148584	1	0.000684167	0.99774	1	-1.36553	1.84e-10	2.2e-09	-0.284147	0.167352	1	-0.294645	0.157305	1	36.588	35.631	42.011	35.98	38.751	19.3
67903	Gipc1	NM_018771	chr8	86176577	86188688	+	1607	1	Gipc1|GIPC|Glut1CIP|Rgs19ip1|Semcap1|TIP-2|TaxIP2|-|8|8 C3|protein-coding	0.190998	0.332198	1	1.22915	1.37e-05	0.000335471	1.03776	5.47e-08	4.91e-07	0.000782688	1	1	-0.0521229	0.802644	1	12.271	11.419	11.615	13.824	25.758	28.09
14613	Gja5	NM_008121	chr3	96836325	96857557	+	3119	1	Gja5|5730555N10Rik|Cnx40|Cx40|Gja-5|-|3 F2.1|3 42.04 cM|protein-coding	-2.96864	0.00109601	0.0475737	-6.48273	1.16e-05	0.000287503	-6.52734	2.45e-06	1.73e-05	1.4943	0.000324636	0.0624523	0.744035	0.105761	1	0.257	0.147	0.087	0.011	0	0
14933	Gk	NM_001294140	chrX	82947276	83022158	-	4422	1	Gk|D930012N15Rik|Gyk|-|X 39.32 cM|X C-D|protein-coding	0.00824752	0.959142	1	-0.626958	0.0116069	0.106491	-1.62996	7.05e-18	1.56e-16	-0.0331529	0.847389	1	-0.0531698	0.761073	1	4.498	4.324	4.417	4.508	2.783	1.635
70893	Glb1l3	NM_001113323	chr9	26625538	26668408	-	2443	1	Glb1l3|4921509F24Rik|-|9|9 A4|protein-coding	2.55983	1	1	6.02484	0.000506263	0.0081269	5.3783	0.00386181	0.0150608	0	1	1	0	1	1	0	0	0	0.007	0.083	0.058
14632	Gli1	NM_010296	chr10	126766938	126778635	-	3647	1	Gli1|AV235269|Zfp-5|Zfp5|-|10 D3|10 74.5 cM|protein-coding	0.32113	0.611294	1	-1.08388	0.104158	0.514499	1.45734	0.00078556	0.00353951	-0.0461599	1	1	-0.0587723	1	1	0.084	0.083	0.084	0.108	0.038	0.266
230587	Glis1	NM_147221	chr4	107107324	107307664	+	2891	1	Glis1|Gli5|Gli6|GliH1|-|4|4 C6|protein-coding	-0.322451	0.274025	1	-1.02402	0.00677147	0.0696167	-1.89974	1.68e-08	1.61e-07	0.448908	0.0755991	1	0.60259	0.0167949	0.74929	0.916	1.007	0.651	0.54	0.304	0.199
226075	Glis3	NM_175459	chr19	28333341	28754567	-	7501	1	Glis3|4833409N03Rik|E330013K21Rik|-|19|19 C1|protein-coding	-2.0188	0.201813	1	0.967916	0.611559	1	2.14172	0.00315035	0.0125217	-1.59015	0.397366	1	-2.31565	0.217678	1	0.003	0.002	0.009	0.002	0.024	0.051
56700	Glmp	NM_020003	chr3	88128945	88132553	+	1529	1	Glmp|0610031J06Rik|AB027141|NCU-G1|-|3|3 F1|protein-coding	-0.00864583	0.972771	1	0.347297	0.181123	0.734949	1.3456	5.77e-14	9.61e-13	0.0586447	0.752087	1	-0.00733011	0.9666	1	4.717	4.495	4.351	4.484	5.519	12.821
110304	Glra3	NM_080438	chr8	58419622	58604149	+	1463	1	Glra3|-|-|8 B2|8 29.69 cM|protein-coding	3.3851	0.522405	1	5.13e-15	1	1	5.06693	0.0138744	0.0476284	0	1	1	2.40133	1	1	0	0.008	0	0.022	0	0.077
14658	Glrb	NM_010298	chr3	80647521	80717582	-	3017	1	Glrb|AI853901|Glyrb|spa|spastic|-|3 35.71 cM|3 E3-F1|protein-coding	5.13e-15	1	1	4.83125	0.0927331	0.480904	5.6302	0.00196207	0.00812502	0	1	1	2.40241	1	1	0	0.004	0	0	0.021	0.057
93692	Glrx	NM_053108	chr13	75977334	75987599	+	1322	1	Glrx|C86710|D13Wsu156e|Glrx1|Grx1|TTase|-|13 C1|13 40.95 cM|protein-coding	-0.309926	0.101073	1	-0.50817	0.0513228	0.318822	-1.59294	1.13e-14	1.98e-13	-0.575928	0.00291226	0.324219	-0.609239	0.00215791	0.194349	10.707	10.444	15.124	12.761	10.559	5.893
30926	Glrx3	NM_023140	chr7	144629331	144660277	+	1638	1	Glrx3|PICOT|Txnl2|-|7|7 F5|protein-coding	-0.239217	0.213638	1	-0.344302	0.278694	0.936523	-1.24869	1.55e-10	1.87e-09	-0.250958	0.185051	1	-0.184036	0.338448	1	87.951	91.132	98.962	87.656	71.484	49.142
73046	Glrx5	NM_028419	chr12	106270828	106279121	+	998	1	Glrx5|-|-|12|12 E|protein-coding	-0.117786	0.57216	1	-0.231625	0.487761	1	-1.06288	2.75e-07	2.24e-06	-0.290705	0.150614	1	-0.245686	0.244452	1	95.52	94.813	110.262	105.908	85.545	62.422
14660	Gls	NM_001113383	chr1	52242125	52290076	-	4402	1	Gls|6330442B14|AI314027|B230365M23Rik|-|1 C1.1|1 26.86 cM|protein-coding	-0.313487	0.050696	0.773041	-0.773334	0.0024167	0.0300333	-1.0719	5.18e-11	6.59e-10	-0.0285264	0.857451	1	-0.0444202	0.781609	1	28.357	27.503	27.66	23.085	15.792	15.35
243842	Gltscr1	NM_001081418	chr7	16556611	16584844	-	5344	1	Gltscr1|-|-|7 A2|7 8.67 cM|protein-coding	0.147533	0.414767	1	-0.152641	0.646115	1	1.07586	3.81e-09	3.91e-08	0.162764	0.402181	1	0.06117	0.755613	1	3.23	2.875	2.802	3.197	2.7	6.794
210982	Gltscr1l	NM_001100452	chr17	46935065	46968362	-	6566	1	Gltscr1l|mKIAA0240|-|17|17 C|protein-coding	0.609522	0.000675103	0.032147	0.93262	0.00088276	0.0130072	1.82558	4.04e-23	1.23e-21	0.0978069	0.586081	1	0.00450503	0.979581	1	3.582	3.275	3.249	5.106	6.39	13.247
107146	Glyat	NM_145935	chr19	12707798	12726227	+	1302	1	Glyat|A330009E03Rik|ACGNAT|AI195249|AI315345|CAT|GAT|-|19|19 A|protein-coding	-0.423648	0.0738348	0.958304	-1.0092	0.00133453	0.0184011	-1.9411	2.14e-10	2.54e-09	-0.636013	0.00648086	0.55659	-0.516618	0.0407799	1	1.491	1.642	2.212	1.705	1.087	0.67
791299	Gm10069	NR_028592	chr6	128388775	128425863	+	3919	1	Gm10069|ENSMUSG00000059659|-|-|ncRNA	-0.375829	0.0889878	1	0.0155222	0.964952	1	-1.29693	5.39e-09	5.45e-08	-0.372735	0.0816755	1	-0.393429	0.0718318	1	11.457	11.007	13.956	11.232	12.618	6.742
100042314	Gm10639	NM_001122660	chr9	78137735	78153332	+	865	1	Gm10639|ENSMUSG00000074179|-|9|9 E1|protein-coding	3.90896	0.274564	1	7.24161	1.21e-06	3.66e-05	7.52082	8.33e-12	1.16e-10	0	1	1	0	1	1	0	0	0	0.057	0.59	0.732
100043665	Gm10662	NM_001201364	chr7	22694453	22706308	-	1718	2	Gm10662|ENSMUSG00000074296|-|7|7 A3|protein-coding	5.13e-15	1	1	5.13e-15	1	1	6.60883	6.04e-05	0.000337059	0	1	1	4.70872	0.0468592	1	0	0.042	0	0	0	0.196
100042761	Gm10697	NM_001163731	chr3	93764214	93765236	-	1021	2	Gm10697|ENSMUSG00000074425|-|3 F2.1|3|protein-coding	5.55766	0.00207477	0.0777429	4.9088	0.0603786	0.357737	9.25421	5.15e-31	2.29e-29	0	1	1	0	1	1	0	0	0	0.161	0.1	2.066
100038628	Gm10768	NR_033472	chr19	43913293	43915335	+	2042	1	Gm10768|ENSMUSG00000074828|-|19 C3-D1|19|ncRNA	5.13e-15	1	1	6.55302	5.92e-05	0.00125642	8.9892	4.56e-28	1.77e-26	2.30376	1	1	0	1	1	0.006	0	0	0	0.125	0.861
100041655	Gm10863	NR_029470	chr15	78996496	79046831	+	675	1	Gm10863|ENSMUSG00000075555|-|15|15 E1|ncRNA	0.31558	0.383567	1	0.580938	0.159972	0.686204	1.55902	4.87e-07	3.82e-06	0.594614	0.087461	1	0.704622	0.0347286	1	1.464	1.539	0.94	1.194	1.36	3.208
382064	Gm1110	NM_001281475	chr9	26687152	26730666	-	2362	1	Gm1110|-|-|9|9 A4|protein-coding	1.85979	0.208708	1	0.998599	0.729565	1	4.21117	7.36e-06	4.84e-05	0.854849	0.706672	1	1.25108	0.491199	1	0.02	0.026	0.01	0.042	0.022	0.244
100169874	Gm11110	NR_033508	chr17	57231446	57245365	-	1022	1	Gm11110|ENSMUSG00000079414|-|-|ncRNA	5.13e-15	1	1	5.13e-15	1	1	5.22935	0.00721673	0.0265393	0	1	1	2.40045	1	1	0	0.012	0	0	0	0.124
217122	Gm11545	NM_001105561	chr11	94616450	94622496	-	2686	1	Gm11545|A430060F13Rik|C86086|OTTMUSG00000002043|-|11|11 D|protein-coding	3.38512	0.522483	1	6.91134	5.45e-07	1.77e-05	9.82429	1.88e-31	8.58e-30	0	1	1	0	1	1	0	0	0	0.012	0.138	1.173
100036768	Gm11696	NR_038097	chr11	109216092	109224968	-	2763	1	Gm11696|OTTMUSG00000003456|-|-|ncRNA	0.273028	0.184716	1	0.753495	0.00723579	0.0736972	1.78827	1.33e-19	3.28e-18	0.0207921	0.92581	1	0.0749981	0.740806	1	1.669	1.718	1.591	1.988	2.662	6.347
100043123	Gm11710	NM_001101656	chr11	114892761	114899004	-	806	2	Gm11710|OTTMUSG00000003605|-|11|11 E2|protein-coding	5.13e-15	1	1	3.11872	0.566366	1	5.51198	0.00213615	0.0087787	0	1	1	0	1	1	0	0	0	0	0.032	0.192
100043125	Gm11711	NM_001101657	chr11	114892761	114899004	-	806	2	Gm11711|OTTMUSG00000003606|-|11|11 E2|protein-coding	5.13e-15	1	1	3.12008	0.565298	1	5.51199	0.00213563	0.0087787	0	1	1	0	1	1	0	0	0	0	0.032	0.192
100038570	Gm11744	NM_001163318	chr11	116518422	116529703	+	794	1	Gm11744|OTTMUSG00000003947|Prcd|-|11 E2|11|protein-coding	-0.506856	0.0323964	0.59279	-1.07982	0.00675821	0.0695397	-2.3142	1.88e-18	4.33e-17	-0.193232	0.38936	1	-0.159612	0.503643	1	13.322	13.115	14.389	10.852	6.069	3.418
100038514	Gm11837	NM_001243100	chr4	14857788	14880177	+	888	1	Gm11837|OTTMUSG00000004551|-|4 A2|4|protein-coding	-0.125061	0.618966	1	-1.94677	3.56e-09	1.72e-07	-3.60156	4.95e-38	2.97e-36	0.0891415	0.649083	1	-0.0959181	0.633826	1	9.037	7.877	8.088	7.499	1.981	0.776
654472	Gm12070	NR_002890	chr11	26685108	26687859	+	1644	1	Gm12070|OTTMUSG00000005300|-|11 A3.3|11|pseudo	-0.0457044	0.778316	1	-0.295131	0.263209	0.904845	-1.04152	9.47e-11	1.17e-09	-0.0300028	0.848981	1	0.027859	0.86703	1	196.423	204.642	192.055	194.946	158.924	108.643
624860	Gm12253	NM_001045542	chr11	58246061	58255124	+	1347	1	Gm12253|Gm248|OTTMUSG00000005737|-|11 B1.3|11|protein-coding	-0.498093	0.10822	1	-2.1266	7.19e-07	2.28e-05	-3.2954	5.57e-13	8.61e-12	-0.77861	0.00548908	0.503801	-0.664516	0.0268362	0.994347	0.708	0.744	1.161	0.842	0.256	0.136
100040567	Gm12409	NR_046068	chr4	45775249	45777095	-	643	1	Gm12409|OTTMUSG00000006726|-|4|4 B1|ncRNA	-0.457265	0.190051	1	-1.30056	0.00125434	0.0174555	-2.34908	3.48e-09	3.59e-08	-0.444385	0.137748	1	-0.212669	0.61106	1	1.336	1.484	1.755	1.304	0.694	0.394
620016	Gm12669	NR_033611	chr7	144629357	144659663	+	1000	1	Gm12669|OTTMUSG00000007920|-|4|4 C5|pseudo	-0.261481	0.171481	1	-0.385232	0.220335	0.824268	-1.25668	9e-11	1.11e-09	-0.241144	0.199292	1	-0.196437	0.30268	1	124.497	127.047	139.18	121.218	97.931	68.71
620779	Gm12695	NM_001081284	chr4	96390578	96451851	-	1626	1	Gm12695|OTTMUSG00000008003|-|4|4 C5|protein-coding	5.13e-15	1	1	5.13e-15	1	1	5.74822	0.00063211	0.00290125	0	1	1	0	1	1	0	0	0	0	0	0.112
100504717	Gm12709	NR_040444	chr4	102639871	102662360	-	1908	1	Gm12709|OTTMUSG00000008056|-|4|4 47.24 cM|ncRNA	0.367897	0.532647	1	-0.579785	0.382526	1	-1.51539	0.0103573	0.0366699	0.708601	0.107059	1	1.04369	0.0123264	0.622716	0.284	0.361	0.166	0.224	0.107	0.066
625342	Gm13315	NR_028497	chr2	14642269	14644249	+	1980	1	Gm13315|OTTMUSG00000011384|-|2|2 A2|pseudo	-0.308822	0.0669165	0.908094	-0.7512	0.00342235	0.0400474	-1.41893	7.94e-15	1.42e-13	-0.148736	0.379908	1	-0.035099	0.838102	1	5.473	5.888	5.824	4.858	3.47	2.528
672763	Gm13710	NR_046046	chr2	84340905	84347030	-	827	1	Gm13710|OTTMUSG00000013441|-|2|2 D|ncRNA	3.94088	0.277886	1	6.10255	0.000343104	0.00584321	6.8932	8.34e-08	7.31e-07	3.13763	0.537918	1	2.39916	1	1	0.028	0.015	0	0.06	0.262	0.493
639658	Gm13807	NR_040529	chr2	93243704	93257987	+	1289	1	Gm13807|OTTMUSG00000014546|-|2|2 E1|ncRNA	-0.57844	0.11229	1	-1.82211	0.000307758	0.00532804	-1.69678	2.68e-05	0.000159273	-0.442783	0.199368	1	-0.136837	0.800167	1	0.493	0.581	0.647	0.446	0.188	0.229
100043424	Gm14005	NR_028591	chr2	128197844	128255087	-	576	1	Gm14005|OTTMUSG00000015351|-|2|2 F1|ncRNA	0.175513	0.60302	1	1.58342	0.000933318	0.0136104	1.12563	2.61e-05	0.000155353	-0.582902	0.0467685	1	-0.565756	0.0581374	1	3.33	3.293	4.714	5.424	12.239	12.158
623781	Gm14137	NM_001039223	chr2	119000245	119003311	+	3064	1	Gm14137|OTTMUSG00000015762|-|2|2 E5|protein-coding	0.362229	0.504242	1	0.355896	0.572988	1	1.51993	0.000313129	0.00152642	0.0639025	0.904443	1	0.189271	0.708768	1	0.1	0.106	0.092	0.123	0.116	0.308
100038909	Gm14548	NM_001166672	chr7	3835814	3849694	-	2118	1	Gm14548|OTTMUSG00000017169|-|7|7 A1|protein-coding	2.37497	2.58e-07	3.59e-05	6.54903	3.46e-52	4.38e-49	11.2014	2.57e-280	8.82e-277	-1.02786	0.270865	1	-5.61425	0.00100435	0.115614	0.033	0	0.067	0.365	6.543	185.869
625210	Gm14625	NM_001220498	chrX	52683412	52700069	+	642	1	Gm14625|OTTMUSG00000017492|-|X A5|X|protein-coding	-0.45122	0.250731	1	-0.975439	0.0749595	0.414497	-2.4885	7.18e-07	5.52e-06	-0.115734	0.788679	1	-0.303203	0.406072	1	1.136	0.997	1.172	0.896	0.556	0.241
574404	Gm14685	NM_001025383	chrX	70382571	70388763	+	2767	2	Gm14685|-|-|X A7.3|X|protein-coding	0.0102735	1	1	-1.20733	0.0110695	0.102459	-1.74015	9.22e-07	6.98e-06	0.089921	0.777713	1	0.221991	0.440848	1	0.685	0.733	0.624	0.648	0.286	0.213
100039934	Gm15085	NM_001122734	chrX	145532495	145572695	+	2018.9	7	Gm15085|OTTMUSG00000018973|-|X|X F3|protein-coding	5.13e-15	1	1	5.32945	0.0307672	0.220788	5.63555	0.00114883	0.0050145	0	1	1	0	1	1	0	0	0	0	0.069	0.084
100039890	Gm15093	NM_001099920	chrX	144435112	144467717	-	2012.9	7	Gm15093|ENSMUSG00000072925|OTTMUSG00000018984|-|X F3|X|protein-coding	5.13e-15	1	1	5.20346	0.0423478	0.278113	5.3783	0.00385937	0.0150537	0	1	1	0	1	1	0	0	0	0	0.063	0.07
622070	Gm15133	NR_040749	chr7	111463545	111473352	+	825	1	Gm15133|OTTMUSG00000019186|-|7|7 E3|ncRNA	2.5578	1	1	3.12001	0.565352	1	6.36172	1.09e-05	6.96e-05	0	1	1	0	1	1	0	0	0	0.02	0.031	0.341
100040599	Gm15319	NM_001177408	chr8	19933242	19958780	-	2502	1	Gm15319|OTTMUSG00000020118|-|8|8 A1.3|protein-coding	0.0853894	1	1	-0.650585	0.638883	1	1.8035	0.00305346	0.0121738	0.933522	0.163035	1	-1.98351	0.192557	1	0.085	0.01	0.042	0.046	0.025	0.174
100038554	Gm15348	NR_033546	chr8	12706944	12719127	-	3651	1	Gm15348|ENSMUSG00000074469|OTTMUSG00000020606|-|-|ncRNA	5.13e-15	1	1	2.30836	1	1	5.51047	0.00234746	0.00956929	0	1	1	0	1	1	0	0	0	0	0.003	0.042
100503307	Gm15408	NR_040429	chr5	149818538	149824352	+	1375	1	Gm15408|OTTMUSG00000021225|-|5|5 89.16 cM|ncRNA	-0.230466	0.625128	1	-0.774109	0.186068	0.745479	-1.64993	0.00418343	0.0161631	-0.235435	0.656175	1	-0.553841	0.288117	1	0.248	0.193	0.282	0.251	0.167	0.102
100042049	Gm15421	NR_004442	chr5	22034039	22034848	-	809	1	Gm15421|OTTMUSG00000021442|-|5|5 A3|pseudo	-0.264458	0.250274	1	-0.00882375	0.982223	1	-1.30406	2.64e-09	2.76e-08	-0.294464	0.164872	1	-0.338239	0.118879	1	68.749	64.268	79.3	67.886	70.122	38.103
100038464	Gm15441	NR_040409	chr3	96359691	96370724	-	1669	1	Gm15441|ENSMUSG00000074398|OTTMUSG00000021867|-|-|ncRNA	0.0713821	0.734262	1	1.27347	3.02e-06	8.45e-05	4.20435	1.08e-111	3.66e-109	0.101432	0.653052	1	0.176385	0.531576	1	2.432	2.36	2.176	2.355	5.309	46.73
101056408	Gm15816	NM_001282148	chr8	24249257	24260057	-	1689	1	Gm15816|OTTMUSG00000026380|-|8|8 11.42 cM|protein-coding	-0.279772	0.443541	1	-1.13644	0.0536218	0.329865	-1.64526	0.000238261	0.00118598	-1.1653	0.00358901	0.370407	-0.723303	0.0752319	1	0.167	0.222	0.362	0.312	0.151	0.133
100504026	Gm16157	NR_040340	chr7	75411225	75421480	-	1143	1	Gm16157|OTTMUSG00000031023|-|7|7 37.49 cM|ncRNA	-0.0185315	1	1	-1.47394	0.0206557	0.165408	-4.74813	8.48e-08	7.41e-07	0.0181581	1	1	0.103175	1	1	0.349	0.381	0.359	0.335	0.142	0.065
100038595	Gm16287	NR_033543	chr4	138731322	138736570	-	2319	1	Gm16287|ENSMUSG00000073739|OTTMUSG00000009902|OTTMUSG00000033208|-|-|ncRNA	0.45431	0.714779	1	0.205423	1	1	2.53049	0.0037561	0.0146819	-1.42162	0.645621	1	0.0386464	1	1	0.005	0.016	0.015	0.021	0.016	0.109
100039055	Gm16404	NM_001220497	chrX	52804773	52821634	+	642	1	Gm16404|EG625711|-|X|X A5|protein-coding	-0.457329	0.247851	1	-1.01964	0.0715284	0.401879	-2.67307	4.83e-07	3.79e-06	-0.212185	0.609897	1	-0.340636	0.373395	1	1.1	1.016	1.208	0.922	0.556	0.219
100040867	Gm16405	NM_001166646	chrX	51834385	51851190	+	692	2	Gm16405|EG625802|-|X|X A5|protein-coding	-0.545223	0.139558	1	-0.844828	0.0740178	0.410738	-2.05704	1.58e-06	1.15e-05	-0.529904	0.129429	1	-0.772049	0.0344525	1	2.006	1.676	2.718	1.948	1.437	0.772
100040894	Gm16430	NM_001166601	chrX	51834385	51851190	+	692	2	Gm16430|EG666120|-|X|X A5|protein-coding	-0.564013	0.130723	1	-0.86332	0.0700785	0.395768	-2.07606	1.54e-06	1.13e-05	-0.549022	0.122882	1	-0.791276	0.0329751	1	2.006	1.676	2.752	1.948	1.437	0.772
545391	Gm16432	NM_001034899	chr1	179921566	179978422	+	1653	1	Gm16432|EG545391|EG666250|-|1|1 H4|protein-coding	1.2592	0.663627	1	0.0288278	1	1	4.42521	4.96e-06	3.34e-05	1.31095	0.65845	1	0.782735	1	1	0.021	0.015	0.007	0.02	0.008	0.221
100504191	Gm16576	NR_045069	chr15	79573128	79587824	+	5400	1	Gm16576|-|-|15 E1|15 37.85 cM|ncRNA	0.257739	0.232379	1	0.934943	0.00365322	0.042217	1.33759	1.82e-10	2.18e-09	0.200154	0.350684	1	-0.0446506	0.863761	1	1	0.841	0.845	1.041	1.662	2.456
100504467	Gm16596	NR_045751	chr12	109774612	109793828	-	1541	1	Gm16596|-|-|12 F1-F2|12 59.46 cM|ncRNA	4.61299	0.0413672	0.688151	7.42576	9.39e-09	4.17e-07	10.4201	3.72e-51	3.51e-49	0	1	1	0	1	1	0	0	0	0.053	0.356	3.084
381544	Gm1661	NM_001145637	chr4	116885938	116924522	-	1822	1	Gm1661|Gm1662|Ncrna00082|-|4|4 D1|protein-coding	0.774769	1	1	0.544847	1	1	3.15837	3.37e-05	0.000197015	0.885811	0.533768	1	0.373096	1	1	0.042	0.026	0.017	0.035	0.045	0.219
100502764	Gm16617	NR_045728	chr14	52606064	52608504	-	710	1	Gm16617|-|-|14 C2|14 26.75 cM|ncRNA	1.20516	0.314977	1	4.94236	2.93e-20	4.93e-18	6.71095	7.49e-69	1.19e-66	0.767675	0.457039	1	-0.276772	1	1	0.149	0.068	0.083	0.208	2.621	10.557
212728	Gm17296	NM_001159907	chr8	128950552	128998965	-	5029	1	Gm17296|Gm179|Tarbp1|-|8|8 E2|protein-coding	0.111249	0.507142	1	-1.02901	0.000162269	0.00308953	-1.09697	2.22e-10	2.63e-09	0.0634499	0.698293	1	-0.0140574	0.936171	1	9.157	8.523	8.491	9.436	4.289	4.569
100034739	Gm17762	NR_028378	chr2	17948876	17952204	+	3328	1	Gm17762|-|-|2|2 A2|ncRNA	0.478075	0.0838105	1	1.15206	0.000360211	0.00608713	1.268	4.4e-07	3.47e-06	-0.00330232	1	1	0.234281	0.386396	1	0.35	0.399	0.336	0.484	0.728	0.942
100316903	Gm20605	NR_033148	chr5	138070351	138084124	+	4491	1	Gm20605|Lrch4-sap25|-|-|ncRNA	0.189678	0.235937	1	0.425347	0.0915937	0.477053	1.20942	1.19e-13	1.94e-12	0.0611144	0.708792	1	0.0591739	0.72565	1	17.831	17.094	16.497	19.46	21.681	44.158
100861668	Gm21119	NM_001270553	chr8	19933242	19958780	+	2500.7	3	Gm21119|-|-|8|8|protein-coding	-0.274524	0.754616	1	-1.24062	0.194412	0.766186	1.53011	0.000753555	0.00340615	0.542659	0.350246	1	-2.54249	0.0146992	0.682876	0.141	0.014	0.094	0.079	0.036	0.315
100861908	Gm21319	NM_001270722	chr12	89320165	89569046	+	1851	1	Gm21319|-|-|12|12|protein-coding	-0.486114	0.00765236	0.217	-0.870443	0.00100498	0.0145233	-1.06952	4.07e-08	3.71e-07	-0.0212807	0.915922	1	-0.21535	0.282709	1	4.424	3.903	4.286	3.207	2.3	2.378
101488212	Gm21975	NM_146023	chr11	79326887	79344111	-	3958	1	Gm21975|Evi2a-evi2b|-|11 B5|11|protein-coding	1.0589	1.39e-09	3.18e-07	2.13262	5.59e-14	5.28e-12	2.99933	1.48e-67	2.24e-65	-0.571862	0.00123238	0.16283	-0.451783	0.0131839	0.644377	1.697	1.828	2.432	5.176	11.105	22.519
381967	Gm26705	NR_103487	chr7	106408991	106415728	-	1453	1	Gm26705|-|-|7|7 E1|ncRNA	5.13e-15	1	1	2.31034	1	1	5.06693	0.0138622	0.0476072	0	1	1	0	1	1	0	0	0	0	0.009	0.077
14667	Gm2a	NM_010299	chr11	54911487	54926530	+	4250	1	Gm2a|AA408702|AW215435|GM2-AP|SAP-3|-|11 B1.3|11 32.13 cM|protein-coding	0.707841	0.000510781	0.0255359	1.33732	1.24e-06	3.73e-05	2.13831	1.55e-23	4.86e-22	-1.3669	1.56e-09	1.21e-06	-1.53403	3.69e-11	4.67e-08	1.035	0.915	2.528	4.295	6.575	13.077
100384868	Gm37013	NM_001174154	chr18	37112302	38001526	+	4615	1	Gm37013|Pcdha4-g|-|18|18|protein-coding	-0.21206	0.471828	1	0.74895	0.0229162	0.176794	1.59789	3.72e-11	4.8e-10	0.050477	0.879891	1	-0.160311	0.638328	1	0.436	0.359	0.408	0.367	0.652	1.42
100042295	Gm3776	NM_001243092	chr9	78104936	78116973	+	865	1	Gm3776|-|-|9 E1|9|protein-coding	3.90896	0.274562	1	7.36796	4.14e-09	1.97e-07	7.75574	7.95e-14	1.31e-12	0	1	1	0	1	1	0	0	0	0.057	0.59	0.862
103611158	Gm38666	NM_001301256	chr18	37127285	38001526	+	4619	1	Gm38666|Pcdha6-g|-|18|18|protein-coding	-0.21204	0.471348	1	0.748937	0.0228425	0.176747	1.59788	3.59e-11	4.67e-10	0.0504653	0.879759	1	-0.160366	0.638018	1	0.436	0.358	0.407	0.367	0.651	1.419
100042715	Gm3985	NM_001177589	chr8	33998977	34060498	-	2509	1	Gm3985|-|-|8|8 A3|protein-coding	5.13e-15	1	1	4.47907	0.0954541	0.490153	7.76899	4.79e-08	4.32e-07	0	1	1	0	1	1	0	0	0	0	0.025	0.303
100043189	Gm4285	NR_045294	chr14	76242725	76244771	-	1360	1	Gm4285|-|-|14 D3|14|ncRNA	0.311853	0.285255	1	1.7965	4.11e-07	1.36e-05	2.26782	1.63e-22	4.83e-21	-0.102879	0.771012	1	-0.311479	0.365496	1	0.761	0.64	0.786	1.004	2.531	4.405
100043523	Gm4498	NM_001167151	chr7	23013583	23014503	-	919	3	Gm4498|Vmn1r97|-|7 A3|7|protein-coding	-1.10976	0.258165	1	-5.13065	0.0173659	0.144687	-5.18048	0.00786098	0.0286327	-1.55481	0.178688	1	-5.19941	0.00687299	0.419795	0.038	0	0.115	0.054	0	0
100043645	Gm4567	NM_001037248	chr7	21309848	21315960	-	1589	3	Gm4567|EG381936|Gm5156|-|7 A3|7|protein-coding	0.331086	1	1	-3.69598	0.348753	1	3.05441	0.00718946	0.0264552	-3.76236	0.29512	1	1.93408	0.0540628	1	0	0.091	0.022	0.031	0	0.239
229571	Gm4858	NM_001034860	chr3	92872745	92879427	+	1805	1	Gm4858|EG229571|-|3 F1|3|protein-coding	-3.48302	0.00247861	0.0897636	-0.426182	0.694849	1	-3.83678	0.000297502	0.00145733	1.31463	0.00721179	0.585885	1.10882	0.0298293	1	0.306	0.268	0.117	0.009	0.078	0.008
328747	Gm5091	NR_046164	chr17	15368549	15377747	-	1174	1	Gm5091|C330048F19|-|17 A2|17|ncRNA	5.13e-15	1	1	4.06734	0.240069	0.85792	5.63428	0.00120015	0.00521221	0	1	1	0	1	1	0	0	0	0	0.033	0.144
331493	Gm5127	NM_001033541	chrX	103778525	103905896	+	1803	1	Gm5127|B130007I08|EG331493|-|X|X D|protein-coding	-0.656982	0.22729	1	-1.16816	0.122003	0.56945	-1.92864	0.000849891	0.00380229	-1.34132	0.011072	0.76508	-1.22166	0.0135591	0.650441	0.085	0.094	0.209	0.137	0.085	0.062
217071	Gm525	NM_001033266	chr11	88935155	88954378	+	575	1	Gm525|-|-|11|11 C|protein-coding	-0.749881	0.321842	1	-2.67824	0.0276689	0.20441	-6.01584	0.00015598	0.000807329	-0.593623	0.417267	1	-0.981066	0.194283	1	0.225	0.168	0.327	0.2	0.044	0
217648	Gm527	NM_001025605	chr12	66018898	66025578	+	1456	1	Gm527|-|-|12|12 C1|protein-coding	1.59501	0.000754579	0.0348949	2.94911	5.99e-11	3.68e-09	3.23265	9.64e-19	2.27e-17	0.265046	0.65132	1	0.461166	0.466411	1	0.162	0.183	0.129	0.407	0.972	1.429
432555	Gm5431	NM_001024230	chr11	48700924	48715654	-	2964	1	Gm5431|EG432555|-|11|11 B1.2|protein-coding	-0.611894	0.0332198	0.602324	-0.156375	0.677571	1	1.60673	2.14e-12	3.16e-11	0.0695397	0.835764	1	0.336554	0.339895	1	0.576	0.632	0.531	0.361	0.465	1.874
434172	Gm5592	NM_001033782	chr7	48539697	48545553	+	3028	1	Gm5592|EG434172|-|7 B3|7|protein-coding	5.13e-15	1	1	2.30872	1	1	5.06316	0.0137111	0.0471284	0	1	1	2.40421	1	1	0	0.004	0	0	0.004	0.037
228715	Gm561	NM_001033297	chr2	144419801	144421101	+	455	1	Gm561|-|-|2|2 G1|protein-coding	-0.362285	0.20814	1	-0.276771	0.569785	1	-1.62294	2.69e-07	2.2e-06	-0.354553	0.21393	1	-0.297207	0.30439	1	21.308	21.904	25.471	21.033	18.015	9.859
230909	Gm572	NM_001085505	chr4	148017426	148045681	+	1372	1	Gm572|b2b1167Clo|-|4|4 E2|protein-coding	3.90893	0.274685	1	5.31355	0.0142946	0.124725	6.73394	3.71e-07	2.96e-06	2.30373	1	1	2.40489	1	1	0.009	0.009	0	0.036	0.093	0.266
545253	Gm5820	NM_001033789	chr18	39052110	39130928	+	2180	1	Gm5820|EG545253|-|18 B3|18|protein-coding	5.13e-15	1	1	5.13e-15	1	1	6.43169	6.53e-06	4.32e-05	0	1	1	0	1	1	0	0	0	0	0	0.135
545929	Gm5891	NM_001034904	chr7	23917642	23929499	-	1720	2	Gm5891|EG545929|ENSMUSG00000074313|-|7|7 A3|protein-coding	5.13e-15	1	1	5.13e-15	1	1	6.60883	6.05e-05	0.000337356	0	1	1	4.70877	0.0468758	1	0	0.042	0	0	0	0.196
100503879	Gm5901	NM_001195727	chr7	112523612	112526801	+	998	1	Gm5901|EG545989|-|7|7|protein-coding	-0.428206	0.305547	1	0.403598	0.38371	1	1.27737	2.54e-05	0.000151753	0.221417	0.553798	1	0.223516	0.531627	1	0.778	0.75	0.648	0.494	0.869	1.818
547347	Gm6034	NM_001034909	chr17	36179906	36195590	+	1628	1	Gm6034|EG547347|H2-gs14-2|-|17 B1|17|protein-coding	0.208882	0.855683	1	1.56585	0.0119368	0.108565	2.65647	1.58e-09	1.71e-08	0.590073	0.289452	1	0.695349	0.298134	1	0.159	0.171	0.101	0.121	0.313	0.752
619945	Gm6116	NR_045866	chr5	75345219	75362393	+	1428	1	Gm6116|EG619945|-|5 C3.3|5|ncRNA	5.13e-15	1	1	5.17101	0.0114769	0.105499	8.91599	1.23e-24	4.07e-23	0	1	1	0	1	1	0	0	0	0	0.071	1.172
245536	Gm614	NM_001033362	chrX	98456716	98459331	-	739	1	Gm614|Il2rg|-|X|X D|protein-coding	0.154862	1	1	1.65141	0.0549934	0.335726	2.3134	0.000621695	0.00285904	1.56314	0.0242825	1	0.990679	0.279714	1	0.303	0.196	0.095	0.111	0.311	0.571
623849	Gm6455	NR_003596	chr5	10865029	10870808	+	1067	1	Gm6455|EG623849|-|5|5 A1|pseudo	-0.0956385	0.899492	1	-2.09497	0.00466217	0.05138	-1.38816	0.0113304	0.0397754	-1.93453	0.00108877	0.14792	-2.8333	3.67e-05	0.00802623	0.088	0.045	0.33	0.324	0.072	0.145
623898	Gm6460	NM_001037919	chr5	11594956	11599480	+	814	1	Gm6460|EG623898|-|5 A1|5|protein-coding	-0.46553	0.291153	1	-3.98782	2.73e-06	7.68e-05	-2.04456	0.000172872	0.000887881	-2.30827	2.75e-05	0.0078828	-2.90612	3.14e-06	0.000996532	0.116	0.074	0.563	0.424	0.031	0.155
627427	Gm6756	NR_076393	chr18	37079959	37081861	+	1902	1	Gm6756|EG627427|-|18 B2|18|pseudo	0.0308016	0.848378	1	-0.551844	0.0266321	0.198234	-1.39684	3.86e-18	8.72e-17	-0.0621687	0.690582	1	-0.0442389	0.792767	1	29.718	29.013	29.707	31.373	19.618	13.146
628664	Gm6902	NM_001270494	chr7	21509531	21511986	-	1410	3	Gm6902|EG628664|-|7|7 A3|protein-coding	0.331202	1	1	-3.69566	0.347823	1	3.05442	0.0071856	0.0264451	-3.76196	0.294441	1	1.81952	0.0840021	1	0	0.094	0.025	0.035	0	0.269
628693	Gm6904	NM_001164329	chr14	59863278	59879053	-	890	1	Gm6904|EG628693|-|14|14 C3|protein-coding	0.711594	0.128902	1	1.78395	9.04e-05	0.00183511	2.44328	2.15e-11	2.85e-10	-0.983877	0.0941634	1	-1.47199	0.036995	1	0.159	0.109	0.304	0.517	1.06	1.943
630294	Gm7030	NM_001177467	chr17	36264554	36266370	-	893	1	Gm7030|EG630294|H2-t9|-|17|17 B1|protein-coding	-0.0516469	0.78753	1	0.493164	0.0691994	0.392194	1.02998	2.68e-09	2.8e-08	0.206596	0.337475	1	0.245824	0.236717	1	9.79	9.564	8.161	8.139	11.749	19.401
665037	Gm7457	NR_045707	chr6	142762751	142782014	+	2452	1	Gm7457|EG665037|ENSMUSG00000072683|-|6|6 G3|ncRNA	2.6018	0.00066666	0.0318711	3.54617	3.88e-07	1.3e-05	4.647	5.31e-20	1.36e-18	0.922012	0.441891	1	0.77685	0.586254	1	0.038	0.034	0.019	0.127	0.239	0.591
665378	Gm7609	NM_001081746	chr1	85196186	85210337	+	1605	1	Gm7609|EG665378|-|1|1 C5|protein-coding	-0.0154248	1	1	1.5499	3.09e-07	1.05e-05	2.65353	1.64e-37	9.6e-36	-0.377	0.169865	1	-0.35034	0.175493	1	0.814	0.82	1.018	1.035	3.01	7.448
330440	Gm766	NM_001145390	chr6	142734301	142752986	-	1467	1	Gm766|-|-|6|6 G3|protein-coding	-0.169502	1	1	0.400613	1	1	2.44485	0.00590928	0.0221651	-1.43701	0.646134	1	-0.0477299	1	1	0.008	0.025	0.024	0.022	0.035	0.163
329839	Gm829	NM_001033412	chr4	45696461	45736578	+	1085	1	Gm829|-|-|4|4 B1|protein-coding	-2.52256	0.0529694	0.788987	-5.16327	0.0119208	0.108565	-5.20527	0.00861837	0.031076	-0.627665	0.640345	1	-0.363571	0.819802	1	0.065	0.078	0.097	0.015	0	0
667094	Gm8453	NM_001167150	chr7	20818257	20819177	-	919	3	Gm8453|EG667094|Vmn1r145|-|7|7 A3|protein-coding	-1.10977	0.258185	1	-5.13064	0.0173743	0.144687	-5.18048	0.00786353	0.0286376	-1.55481	0.178699	1	-5.19941	0.00687455	0.419795	0.038	0	0.115	0.054	0	0
667977	Gm8909	NM_001081032	chr17	36301389	36305482	-	1347	1	Gm8909|EG667977|H2-Tw5l|H2-gs17|-|17 B1|17|protein-coding	-0.115083	0.546802	1	0.692401	0.00880882	0.086178	1.26489	1.25e-12	1.88e-11	0.111299	0.630649	1	0.168845	0.417	1	4.516	4.493	4.023	3.845	6.549	11.254
668359	Gm9125	NM_001163730	chr3	93740555	93747465	-	2321	2	Gm9125|EG668359|-|3 F2.1|3|protein-coding	5.13e-15	1	1	3.99868	0.332845	1	7.88335	2.75e-14	4.69e-13	3.15191	0.535528	1	0	1	1	0.01	0	0	0	0.022	0.351
381260	Gm973	NM_001013771	chr1	59573108	59691353	+	3573	1	Gm973|AW554518|-|1|1 C1.3|protein-coding	0.643298	0.261192	1	1.34787	0.0140192	0.122946	4.09522	6.13e-37	3.56e-35	-0.120517	1	1	-0.162299	1	1	0.059	0.054	0.063	0.101	0.161	1.252
100503794	Gm9920	NR_045093	chr15	54931472	54945137	-	930	1	Gm9920|ENSMUSG00000053749|-|15|15 D1|ncRNA	-0.790716	5.14e-05	0.00363331	-2.31938	8.2e-13	6.42e-11	-3.73045	1.37e-41	9.35e-40	-0.770086	8.14e-05	0.020094	-0.793831	6.35e-05	0.0124134	4.137	3.988	6.812	4.067	1.289	0.59
667055	Gm9992	NM_001142539	chr17	7568061	7589654	-	1581	1	Gm9992|ENSMUSG00000056133|-|17|17 A1|protein-coding	0.0649341	0.816999	1	-1.12653	0.00202955	0.0260708	-1.24726	4.62e-05	0.000263837	-0.0820238	0.803325	1	0.133242	0.641159	1	1.377	1.505	1.42	1.539	0.637	0.685
78816	Gmip	NM_198101	chr8	72332586	72345769	+	3902	1	Gmip|5031419I10Rik|-|8|8 B3.3|protein-coding	0.543993	0.00101866	0.0450287	0.950045	0.000243781	0.00435203	1.71985	2.05e-24	6.68e-23	-0.234322	0.166335	1	-0.201204	0.253442	1	8.95	8.764	10.194	15.229	19.766	38.782
57441	Gmnn	NM_020567	chr13	24843714	24853806	-	968	1	Gmnn|AW546347|Gem|-|13|13 A3.1|protein-coding	-0.150978	0.444584	1	0.0106352	0.97442	1	-1.22849	5.2e-10	5.91e-09	-0.286234	0.136302	1	-0.230515	0.240007	1	90.859	92.111	104.706	98.387	95.044	52.735
14674	Gna13	NM_010303	chr11	109224108	109262683	+	6191	1	Gna13|AU024132|AU043124|Galpha13|-|11 E1|11 71.88 cM|protein-coding	0.220364	0.196433	1	0.510669	0.0765237	0.42009	1.61596	3.97e-20	1.02e-18	0.0610569	0.711746	1	0.0091951	0.957854	1	13.659	13.069	12.679	15.269	18.757	44.834
14679	Gnai3	NM_010306	chr3	107910193	107949070	-	3262	1	Gnai3|AI158965|AW537698|Galphai3|Gnai-3|-|3 F2.3|3 46.83 cM|protein-coding	-0.306971	0.0544915	0.803099	-0.829388	0.00126623	0.01756	-1.19085	1.2e-13	1.96e-12	0.014074	0.928925	1	-0.100298	0.541543	1	75.217	69.481	71.487	59.915	39.932	36.381
14680	Gnal	NM_010307	chr18	67293214	67386445	+	5474	1	Gnal|2610011C15Rik|9630020G10Rik|Galphaolf|Gna10|Golf|-|18 E1|18 39.85 cM|protein-coding	0.804778	3.71e-06	0.000374816	3.06341	6.89e-31	2.51e-28	4.79586	2.75e-136	1.18e-133	-0.0560792	0.758236	1	-0.0331134	0.859932	1	1.214	1.218	1.213	2.181	10.231	39.193
14683	Gnas	NM_022000	chr2	174109821	174172243	+	2448	1	Gnas|5530400H20Rik|A930027G11Rik|C130027O20Rik|GPSA|GSP|Galphas|Gnas1|Gnasxl|Gs-alpha|Gsa|Nesp|Nesp55|Nespl|Oed-Sml|Oedsml|P1|P2|P3|PHP1A|PHP1B|POH|SCG6|-|2 97.89 cM|2 E1-H3|protein-coding	-1.37567	0.00554556	0.169017	-0.732362	0.173465	0.71909	1.52055	0.000292996	0.00143643	-1.11375	0.0179532	0.963663	-1.62505	0.00134833	0.142983	0.72	0.378	1.511	0.468	0.788	5.375
13972	Gnb1l	NM_001285493	chr16	18498964	18566773	+	3649	1	Gnb1l|ESTM55|Gm16314|Me49f07|OTTMUSG00000033458|Wdr14|Wdvcf|-|16 A3|16 11.46 cM|protein-coding	-0.273355	0.129272	1	-0.848363	0.0019185	0.0249104	-1.38807	1.88e-12	2.79e-11	-0.198897	0.266834	1	-0.208106	0.257062	1	3.983	3.855	4.335	3.781	2.301	1.929
14697	Gnb5	NM_010313	chr9	75154095	75193730	+	2234	1	Gnb5|GBS|Gbeta5|flr|-|9 D|9 42.3 cM|protein-coding	-0.276056	0.16571	1	-0.247556	0.400479	1	-1.21268	1.55e-07	1.32e-06	-0.0114537	0.969671	1	-0.076654	0.709767	1	2.202	2.064	2.11	1.836	1.712	1.068
14700	Gng10	NM_025277	chr4	59048028	59054771	+	1115	1	Gng10|AV006524|-|4 B3|4 32.36 cM|protein-coding	-0.296698	0.249412	1	0.28531	0.505824	1	-1.25737	8.91e-07	6.76e-06	-0.472983	0.0567892	1	-0.472847	0.0599287	1	41.355	40.466	53.658	45.628	56.457	26.814
14702	Gng2	NM_001285909	chr14	20691781	20796471	-	3737	1	Gng2|-|-|14 A3|14 11.17 cM|protein-coding	-2.39496	0.0315487	0.584732	0.1981	0.875463	1	4.49375	2e-28	7.83e-27	-2.20029	0.0243444	1	-2.84274	0.00759774	0.445617	0.016	0.01	0.07	0.013	0.066	1.892
230737	Gnl2	NM_145552	chr4	124707258	124732626	+	2332	1	Gnl2|BC003262|HUMAUANTIG|Ngp-1|-|4|4 D2.2|protein-coding	0.170637	0.316282	1	0.609327	0.0228094	0.176747	1.49279	2.28e-18	5.23e-17	0.135184	0.406434	1	0.150016	0.37109	1	36.842	36.935	32.43	37.963	50.107	105.355
30877	Gnl3	NM_153547	chr14	31825619	31832317	-	1909	1	Gnl3|Ns|-|14 B|14 19.09 cM|protein-coding	-0.229232	0.151221	1	-1.07568	3.12e-05	0.000701394	-1.4168	1.43e-18	3.34e-17	0.0234054	0.881535	1	0.0353148	0.826494	1	88.119	88.098	83.128	73.946	38.077	36.206
67980	Gnpda2	NM_001038015	chr5	69966241	69983524	-	1829	1	Gnpda2|4921523I18Rik|4933412A11Rik|BB189630|GNPDA|Gnp2|Sb52|mKIAA4008|-|5|5 D|protein-coding	0.0363269	0.87318	1	1.09557	9.08e-05	0.00184036	1.48385	6.29e-15	1.12e-13	-0.03424	0.879685	1	-0.080036	0.696206	1	2.438	2.312	2.384	2.526	4.851	7.789
224139	Golgb1	NM_030035	chr16	36885097	36933171	+	11001	1	Golgb1|4930428L02Rik|628101|6330407A06Rik|AU042952|C130074L01Rik|F730017E11Rik|Gm6840|mKIAA4151|-|16|16 B3|protein-coding	0.106231	0.644652	1	0.117722	0.734717	1	1.02065	7.35e-06	4.83e-05	0.141041	0.538794	1	0.0072259	0.973925	1	5.063	4.452	4.514	4.998	5.149	10.412
14718	Got1	NM_010324	chr19	43574243	43599095	-	2046	1	Got1|AI789014|Got-1|cAspAT|cCAT|-|19 C3|19 36.67 cM|protein-coding	0.07554	0.638607	1	-0.522842	0.0425597	0.279092	-1.21647	2.25e-13	3.59e-12	0.00754422	0.961812	1	-0.00139737	0.993558	1	48.168	47.34	46.091	50.591	32.499	22.977
14723	Gp1ba	NM_010326	chr11	70452624	70455557	+	2725	1	Gp1ba|GPIba|GPIbalpha|-|11 B4|11 43.2 cM|protein-coding	0.0385245	1	1	0.641244	0.189071	0.752602	1.41285	1.62e-05	0.000100385	0.293747	0.448891	1	0.31005	0.434058	1	0.225	0.222	0.177	0.187	0.285	0.547
67769	Gpatch2	NM_026367	chr1	189039390	189175308	+	4537	1	Gpatch2|5830433G22Rik|5830436K05Rik|AI427714|AI447508|AW107440|AW491060|Gpatc2|-|1|1 H5|protein-coding	0.527309	0.00116048	0.0495668	1.33906	1.86e-06	5.4e-05	1.46312	4.07e-18	9.16e-17	0.055876	0.728992	1	0.0663756	0.689041	1	5.957	5.938	5.539	8.238	14.58	17.652
70373	Gpatch2l	NM_027405	chr12	87582828	87632318	+	3907	1	Gpatch2l|1700020O03Rik|4732487G21Rik|A630090I05Rik|Kiaa1152|-|12|12 D3|protein-coding	0.612893	0.000200979	0.0116738	0.910126	0.000348694	0.00592164	1.44934	6.58e-19	1.56e-17	-0.0924617	0.583978	1	-0.0840548	0.636894	1	4.337	4.239	4.465	7.033	8.506	14.091
66614	Gpatch4	NM_025663	chr3	87847028	87859916	+	1760	1	Gpatch4|2610029K21Rik|Gpatc4|-|3|3 F1|protein-coding	0.116395	0.491107	1	-0.699375	0.00954156	0.091619	-1.14077	3.06e-12	4.42e-11	0.103428	0.524635	1	0.172319	0.318451	1	44.112	46.604	39.412	44.718	25.096	20.627
103978	Gpc5	NM_175500	chr14	115491437	116924414	+	2875	1	Gpc5|A230034F01Rik|-|14|14 E4|protein-coding	0.000894435	1	1	-0.593965	0.646809	1	-2.82013	0.00338134	0.0133516	-1.68998	0.0399147	1	-1.64101	0.0419578	1	0.02	0.021	0.065	0.069	0.04	0.01
74182	Gpcpd1	NM_028802	chr2	132354818	132403984	-	3679	1	Gpcpd1|2310004G06Rik|2310032D16Rik|AU015213|Gde5|Prei4|mKIAA1434|-|2|2 F3|protein-coding	0.423171	0.0125386	0.312128	0.842233	0.000589459	0.00925244	1.27997	1.09e-14	1.92e-13	0.165877	0.323793	1	0.218888	0.205902	1	4.663	4.695	4.01	5.506	7.121	11.257
14555	Gpd1	NM_010271	chr15	99548024	99555438	+	2775	1	Gpd1|AI747587|Gdc-1|Gdc1|mKIAA4010|-|15 F1-F3|15 56.13 cM|protein-coding	0.129698	0.770638	1	-0.17078	0.687109	1	1.27331	0.000331303	0.00160719	-0.463121	0.300514	1	0.275101	0.542854	1	0.131	0.218	0.174	0.196	0.161	0.492
333433	Gpd1l	NM_175380	chr9	114808457	114843105	-	4383	1	Gpd1l|2210409H23Rik|D9Ertd660e|-|9 F3|9 65.47 cM|protein-coding	0.499706	0.0017767	0.0686884	1.06346	4.6e-05	0.000994588	1.61697	7.62e-22	2.16e-20	0.00752251	0.96229	1	0.0103712	0.950581	1	12.037	11.959	11.505	16.721	24.458	41.043
234267	Gpm6a	NM_001253754	chr8	55864787	56146231	+	2957	1	Gpm6a|Gpm6|M6A|-|8|8 B3.2|protein-coding	2.55834	1	1	7.5088	8.03e-09	3.63e-07	10.9448	1.39e-53	1.39e-51	2.30367	1	1	0	1	1	0.004	0	0	0.006	0.198	2.316
277463	Gpr107	NM_178760	chr2	31007836	31072087	+	3906	1	Gpr107|9930033D15Rik|AI790205|C530034M11|mKIAA1624|-|2|2 B|protein-coding	-0.0211309	0.90061	1	0.430154	0.0893849	0.469207	1.05614	2.08e-11	2.76e-10	-0.0277327	0.866355	1	-0.0208777	0.901	1	5.241	5.208	5.146	5.254	7.072	12.399
83924	Gpr137b	NM_031999	chr13	13449888	13485891	-	2971	1	Gpr137b|AI788917|AU016435|AW546472|C730041E01|C80550|C80741|D13Abb1e|Tm7sf1|-|13 A1|13 5.24 cM|protein-coding	3.32945	0.534936	1	4.83111	0.0926243	0.480728	5.94861	0.000258165	0.00127923	0	1	1	2.39899	1	1	0	0.004	0	0.011	0.021	0.071
353346	Gpr141	NM_181754	chr13	19841551	19916126	-	3426	1	Gpr141|PGR13|-|13|13 A2|protein-coding	-0.744431	0.768299	1	-0.0517722	1	1	3.59761	2.99e-12	4.34e-11	-1.74405	0.209283	1	-2.5193	0.0915154	1	0.007	0.004	0.024	0.014	0.022	0.349
239845	Gpr156	NM_153394	chr16	37916582	38007615	+	4571	1	Gpr156|Gababl|-|16|16 B3|protein-coding	0.397334	1	1	0.794288	0.760906	1	2.4496	0.0058658	0.0220123	1.29197	0.256296	1	0.923246	0.54206	1	0.021	0.016	0.008	0.011	0.014	0.052
71862	Gpr160	NM_001134385	chr3	30754872	30796116	+	2202	1	Gpr160|1700025D19Rik|GPCR150|-|3|3 B|protein-coding	1.0297	0.00313374	0.107807	1.25692	0.00162067	0.0216512	2.51432	2.46e-17	5.26e-16	-0.373476	0.386106	1	-0.78795	0.0563043	1	0.25	0.162	0.27	0.617	0.678	1.875
14788	Gpr162	NM_013533	chr6	124808463	124813935	-	2668	1	Gpr162|A-2|BC031437|Grca|-|6 F2|6 59.17 cM|protein-coding	-0.130355	0.799906	1	-0.0247763	0.949254	1	1.50648	2.82e-07	2.3e-06	0.894898	0.00204896	0.240348	0.631292	0.0425722	1	0.52	0.43	0.269	0.253	0.268	0.886
381413	Gpr176	NM_201367	chr2	118102834	118199155	-	3906	1	Gpr176|Gm1012|-|2|2 E5|protein-coding	8.01001	2.64e-15	1.51e-12	9.65892	8.49e-28	2.52e-25	10.9316	3.05e-47	2.53e-45	0	1	1	0	1	1	0	0	0	0.227	0.646	1.739
217143	Gpr179	NM_001081220	chr11	97193423	97213387	-	9263	1	Gpr179|5330439C02Rik|Gpr158l1|-|11|11 D|protein-coding	-0.305443	0.25159	1	-1.85184	6.66e-05	0.00139851	-2.22701	4.65e-12	6.58e-11	-0.635742	0.0241495	1	-0.910534	0.002062	0.189278	0.213	0.17	0.324	0.268	0.095	0.079
110168	Gpr18	NM_182806	chr14	122310656	122314996	-	1306	1	Gpr18|-|-|14 E5|14 65.86 cM|protein-coding	4.29088	0.146588	1	5.01417	0.0215681	0.17016	5.22935	0.00721299	0.0265296	2.30356	1	1	3.09764	0.54359	1	0.009	0.018	0	0.05	0.068	0.097
11536	Gpr182	NM_007412	chr10	127186658	127188854	-	1690	1	Gpr182|AM-R|Admr|G10-D|Gpcr17|Gpcr22|MB10|NOW|-|10 D3|10 75.07 cM|protein-coding	0.273826	0.629531	1	0.978866	0.0369019	0.251954	3.27508	1.04e-25	3.59e-24	0.210189	0.744379	1	-0.0375886	1	1	0.244	0.2	0.202	0.253	0.4	2.288
383563	Gpr25	NM_001101516	chr1	138155491	138157450	-	1958	1	Gpr25|Gm1300|-|1|1 E4|protein-coding	-0.515098	0.00133221	0.0545754	-2.52874	7.38e-21	1.3e-18	-2.78599	3.2e-35	1.74e-33	-0.545821	0.000394908	0.0721082	-0.653381	4.45e-05	0.00928092	28.712	25.949	40.347	29.435	6.582	6.751
14748	Gpr3	NM_008154	chr4	132765255	132768451	-	2139	1	Gpr3|Gpcr20|Gpcr21|Gpcr3|-|4|4 D3|protein-coding	5.13e-15	1	1	3.12032	0.565104	1	5.23095	0.00722245	0.0265482	0	1	1	2.3982	1	1	0	0.006	0	0	0.012	0.059
227326	Gpr55	NM_001033290	chr1	87836112	87857630	-	2546	1	Gpr55|Gm218|Lpir1|-|1|1 C5|protein-coding	3.53669	3.7e-13	1.43e-10	5.14343	2.86e-18	4.02e-16	8.35422	3.27e-138	1.46e-135	-1.68314	0.289631	1	-1.17873	0.397929	1	0.009	0.014	0.032	0.4	1.227	12.704
14744	Gpr65	NM_008152	chr12	99506845	99514932	+	2143	1	Gpr65|Dig1|Gpcr25|TDAG8|-|12|12 E|protein-coding	-0.339885	0.0422932	0.696592	-1.99027	1.55e-13	1.36e-11	-2.04851	3.35e-24	1.08e-22	-0.199103	0.232098	1	-0.403657	0.017051	0.754928	6.484	5.558	7.163	5.885	1.802	2.001
238377	Gpr68	NM_001177674	chr12	102114892	102137734	-	3097	1	Gpr68|BB131428|Ogr1|-|12|12 E|protein-coding	0.820796	0.187271	1	-3.28097	0.0108495	0.101077	1.57615	0.001573	0.00666199	-0.163273	1	1	0.380208	0.738086	1	0.046	0.066	0.049	0.09	0.004	0.173
237716	Gpr75	NM_175490	chr11	30785358	30793725	+	2918	1	Gpr75|-|-|11|11 A4|protein-coding	3.94089	0.277895	1	4.12681	0.171443	0.714387	6.83823	2.19e-07	1.81e-06	4.37016	0.0841287	1	2.27826	1	1	0.02	0.004	0	0.017	0.017	0.135
319200	Gpr82	NM_175669	chrX	13238489	13244559	+	2491	1	Gpr82|-|-|X|X A1.1|protein-coding	0.33228	1	1	1.78972	0.50135	1	4.25659	1.82e-05	0.000111902	-0.0369422	1	1	0.8097	1	1	0.005	0.01	0.005	0.007	0.015	0.13
14608	Gpr83	NM_010287	chr9	14664654	14675233	+	3580	1	Gpr83|AW045253|Gir|Gpr72|RP105|RP39|RP82|-|9 A2-A3|9 4.4 cM|protein-coding	-1.5133	3.33e-08	5.56e-06	-2.26217	3.17e-10	1.76e-08	-2.55447	2.51e-17	5.35e-16	0.252705	0.30285	1	0.302953	0.230271	1	1.61	1.677	1.313	0.473	0.267	0.255
64297	Gprc5b	NM_022420	chr7	126115554	126138725	-	4519	1	Gprc5b|AW125761|Raig2|-|7|7 F3|protein-coding	-3.91676	0.15519	1	-1.59512	0.448159	1	3.5421	1.16e-08	1.13e-07	-1.82973	0.408352	1	-1.74552	0.414063	1	0.003	0.003	0.01	0	0.003	0.149
106512	Gpsm3	NM_134116	chr17	34726751	34728699	+	1337	1	Gpsm3|AA960287|AGS4|-|17|17 B1|protein-coding	0.144389	0.372795	1	0.329935	0.174504	0.721395	1.40236	1.82e-17	3.93e-16	0.0595947	0.715133	1	0.0182614	0.917023	1	14.169	13.119	13.02	14.955	15.818	40.063
108682	Gpt2	NM_173866	chr8	88016516	88051457	+	3582	1	Gpt2|4631422C05Rik|ALT2|AU014768|AU041193|C87201|-|8|8 C3|protein-coding	-0.171553	0.278064	1	-1.17149	2.33e-06	6.68e-05	-2.19542	7.8e-39	4.87e-37	-0.210849	0.170226	1	-0.0841354	0.592546	1	15.153	16.286	16.834	15.429	7.527	4.264
14775	Gpx1	NM_008160	chr9	108241411	108242673	+	1041	1	Gpx1|AI195024|AL033363|CGPx|GPx-1|GSHPx-1|Gpx|-|9 59.24 cM|9 F1|protein-coding	0.22825	0.341069	1	1.22111	0.000173379	0.00325978	1.00455	3.53e-05	0.000205287	-1.10632	3.07e-06	0.0011704	-0.981853	4.16e-05	0.00884619	95.768	103.813	193.101	236.742	434.573	461.893
625249	Gpx4	NM_008162	chr10	79516233	79519184	+	950	1	Gpx4|GPx-4|GSHPx-4|PHGPx|mtPHGPx|snGPx|-|10 C1|10 39.72 cM|protein-coding	-0.560497	0.0466681	0.735721	-0.211697	0.62722	1	-1.06042	0.000180972	0.000925922	-0.621972	0.0254399	1	-0.569266	0.0430321	1	127.359	128.609	182.436	130.818	138.122	104.967
235283	Gramd1b	NM_172768	chr9	40105492	40263349	-	2792	1	Gramd1b|3222402H23|A930008A22Rik|AI593249|mKIAA1201|-|9|9 B|protein-coding	0.161408	0.390884	1	-0.803061	0.0101181	0.0957915	-1.0879	2.31e-08	2.17e-07	0.269636	0.201185	1	0.0989421	0.598691	1	3.034	2.613	2.429	2.768	1.452	1.325
546134	Gramd2	NM_001033498	chr9	59555571	59564231	+	1355	1	Gramd2|BC064463|-|9|9 B|protein-coding	5.13e-15	1	1	5.13e-15	1	1	5.63856	0.0014555	0.00621566	0	1	1	0	1	1	0	0	0	0	0	0.125
56149	Grasp	NM_019518	chr15	101054638	101063187	+	2004	1	Grasp|tamalin|-|15|15 F3|protein-coding	-2.29642	1.86e-05	0.00151884	-7.50337	4.76e-10	2.57e-08	-3.13624	1.06e-07	9.14e-07	0.216172	0.576031	1	0.262494	0.51304	1	0.335	0.319	0.276	0.057	0	0.035
14784	Grb2	NM_008163	chr11	115505359	115569911	-	2701	1	Grb2|AA408164|Ash|-|11 E2|11 80.91 cM|protein-coding	0.338036	0.0349137	0.62394	0.938939	0.000286992	0.00502277	1.04636	8.28e-11	1.03e-09	-0.130787	0.40021	1	-0.178242	0.266776	1	35.011	32.976	36.707	48.002	70.612	88.338
14786	Grb7	NM_010346	chr11	98308148	98316687	+	2380	1	Grb7|mKIAA4028|-|11 D|11 61.75 cM|protein-coding	-0.285342	0.611178	1	0.524984	0.262065	0.902718	2.54016	7.3e-19	1.73e-17	0.387184	0.477273	1	0.650028	0.139132	1	0.297	0.33	0.222	0.187	0.321	1.501
268527	Greb1	NM_015764	chr12	16677421	16807692	-	8223	1	Greb1|5730583K22Rik|9130004E13|AF180470|AU023194|mKIAA0575|-|12|12 A1.1|protein-coding	-0.0946852	0.663757	1	-1.39393	3.39e-06	9.37e-05	-2.71494	2.1e-26	7.42e-25	0.206916	0.303484	1	0.0411236	0.839638	1	1.18	1.018	0.997	0.99	0.383	0.174
195733	Grhl1	NM_001161406	chr12	25257152	25302256	+	3450	1	Grhl1|LBP-32|MGR|Tcfcp2l2|-|12|12 A1.3|protein-coding	-0.114411	0.679654	1	-0.893562	0.0110621	0.102429	-1.12936	8e-05	0.000436312	0.279245	0.247271	1	0.437252	0.0740254	1	0.651	0.718	0.518	0.496	0.277	0.273
230824	Grhl3	NM_001013756	chr4	135097803	135129535	-	2761	1	Grhl3|AI561912|Get1|Som|Tfcp2l4|ct|-|4 D3|4 67.76 cM|protein-coding	-2.53754	1.08e-09	2.54e-07	-4.55644	3.14e-13	2.67e-11	-3.71158	2.64e-15	4.85e-14	0.752383	0.00346911	0.362703	0.926981	0.000364934	0.05223	0.831	0.914	0.477	0.083	0.018	0.041
170935	Grid2ip	NM_133355	chr5	144125587	144153477	+	3436	1	Grid2ip|-|-|5|5 G2|protein-coding	2.43756	0.0066134	0.194221	6.44284	2.71e-29	9.06e-27	9.09122	2.08e-119	7.56e-117	1.60368	0.114736	1	0.382487	1	1	0.034	0.014	0.01	0.062	0.991	7.064
77998	Grifin	NM_030022	chr5	141039143	141041021	-	532	1	Grifin|E130101O17Rik|-|5|5 G2|protein-coding	-0.541968	1	1	-0.196982	1	1	2.29066	0.0042918	0.0165472	1.06716	0.297474	1	1.22674	0.252245	1	0.199	0.204	0.088	0.062	0.072	0.529
14809	Grik5	NM_008168	chr7	25794870	25857388	-	3816	1	Grik5|GluK5|GluRgamma2|KA2|-|7 A3|7 13.73 cM|protein-coding	0.158132	0.426048	1	0.54782	0.0430329	0.281428	1.89607	1.38e-24	4.56e-23	0.0598376	0.777949	1	0.0371168	0.882104	1	1.184	1.079	1.097	1.254	1.547	4.728
242443	Grin3a	NM_001276355	chr4	49674483	49858641	-	7700	1	Grin3a|6430537F04|A830097C19Rik|NMDAR-L|NR3A|mKIAA1973|-|4|4 B1|protein-coding	1.02672	0.11648	1	0.376244	0.909899	1	1.67801	0.00299173	0.0119505	-0.705332	0.525634	1	-1.08693	0.263738	1	0.011	0.008	0.017	0.037	0.027	0.064
66168	Grina	NM_023168	chr15	76077237	76080334	+	1684	1	Grina|1110025J15Rik|Lag|Tmbim3|-|15|15 E1|protein-coding	0.021561	0.891287	1	0.168377	0.482702	1	1.16343	8.76e-13	1.34e-11	0.0334414	0.829181	1	0.0391984	0.801567	1	19.598	19.153	18.42	19.382	20.598	47.858
54645	Gripap1	NM_001290455	chrX	7367119	7397693	+	2993	1	Gripap1|AI854681|DXImx47e|GRASP-1|Sfc10|mKIAA1167|-|X A1.1|X 3.51 cM|protein-coding	0.25538	0.168232	1	0.403737	0.127744	0.586238	1.08105	4.16e-09	4.25e-08	0.177612	0.329916	1	0.299098	0.110267	1	8.996	9.498	7.706	9.494	10.283	18.745
14772	Grk4	NM_019497	chr5	35003028	35097952	+	2390	1	Grk4|A830025H08Rik|GRK|Gprk2l|Gprk4|-|5 B2|5 17.91 cM|protein-coding	0.707721	0.0159652	0.374916	0.457321	0.223498	0.831648	1.10783	6.4e-05	0.000355176	0.540856	0.0981712	1	0.558976	0.0683469	1	0.522	0.511	0.344	0.585	0.464	0.865
26385	Grk6	NM_001112711	chr13	55546692	55562288	+	2981	1	Grk6|Gprk6|-|13 30.06 cM|13 B1-3|protein-coding	0.192862	0.220127	1	0.599358	0.0177674	0.146822	1.27643	1.96e-15	3.65e-14	0.0313075	0.838629	1	0.0273752	0.86265	1	24.649	24.038	22.721	27.989	35.756	69.141
268934	Grm4	NM_001291045	chr17	27562849	27640478	-	3975	1	Grm4|Gprc1d|mGluR4|-|17|17 A3.3|protein-coding	-0.271879	0.135636	1	-2.18498	1.19e-13	1.07e-11	-1.94661	3.82e-20	9.84e-19	0.0278229	0.888306	1	-0.0673125	0.713783	1	1.797	1.659	1.694	1.452	0.369	0.509
108071	Grm5	NM_001081414	chr7	94732678	95283573	+	8416	1	Grm5|6430542K11Rik|AI850523|Glu5R|Gprc1e|mGluR5|mGluR5b|-|7|7 E1|protein-coding	5.13e-15	1	1	4.12676	0.171555	0.714387	9.46831	4.58e-34	2.33e-32	0	1	1	0	1	1	0	0	0	0	0.006	0.291
14824	Grn	NM_008175	chr11	102291636	102298123	+	2318	1	Grn|Pgrn|epithelin|-|11 D|11 66.29 cM|protein-coding	0.374671	0.0222784	0.465659	0.315749	0.270262	0.920408	4.07517	3.95e-105	1.13e-102	0.0356024	0.833578	1	0.020108	0.903108	1	10.35	10.032	9.766	13.152	12.776	190.343
14829	Grpr	NM_008177	chrX	159951836	159987668	-	2577	1	Grpr|GRP-R|-|X F5|X 75.63 cM|protein-coding	5.13e-15	1	1	3.99884	0.332709	1	7.20219	1.48e-09	1.6e-08	0	1	1	0	1	1	0	0	0	0	0.02	0.196
101612	Grwd1	NM_153419	chr7	53080593	53086159	-	1893	1	Grwd1|A301|AI504353|Grwd|Wdr28|-|7|7 B4|protein-coding	-0.0975041	0.540961	1	-1.04314	3.27e-05	0.000731127	-1.05712	3.89e-11	5e-10	0.0329529	0.831443	1	0.10264	0.516687	1	45.268	46.846	42.428	41.468	20.513	23.705
57911	Gsdma	NM_021347	chr11	98525665	98539022	+	2712	1	Gsdma|BB149167|Gsdm|Gsdm1|Gsdma1|H312E|-|11|11 D|protein-coding	4.59155	0.0787631	0.980581	8.05055	2.28e-13	1.97e-11	9.75693	4.75e-42	3.3e-40	2.29507	1	1	2.2783	1	1	0.004	0.004	0	0.03	0.301	1.104
76758	Gsdma2	NM_029727	chr11	98508073	98519271	+	1653	1	Gsdma2|2200001G21Rik|2210006M16Rik|2210009F20Rik|2210411P14Rik|Gsdm2|Gsdml2|-|11|11 D|protein-coding	5.43873	0.00321046	0.109862	11.5142	6.4e-57	1.28e-53	12.9391	3.42e-151	2.06e-148	0	1	1	0	1	1	0	0	0	0.09	5.468	16.453
450219	Gsdma3	NM_001007461	chr11	98487674	98499403	+	1465	1	Gsdma3|Bsk|Dfl|Fgn|Gsdm1l|Gsdm3|Rco2|Rim3|-|11 D|11 62.21 cM|protein-coding	3.38501	0.522089	1	6.91351	1.43e-06	4.23e-05	8.5661	3.12e-21	8.5e-20	0	1	1	0	1	1	0	0	0	0.022	0.261	0.893
227753	Gsn	NM_001206367	chr2	35111879	35163422	+	2620	1	Gsn|ADF|-|2 B|2 23.5 cM|protein-coding	-0.420593	0.0691837	0.921975	-0.0564613	0.85343	1	1.89703	3.18e-22	9.31e-21	0.0328863	0.905903	1	0.0590947	0.819176	1	1.085	1.024	0.982	0.804	0.99	4.385
14857	Gsta1	NM_008181	chr9	78078476	78090490	+	852	1	Gsta1|Gst2-1|OTTMUSG00000031890|-|9 E1|9 43.65 cM|protein-coding	3.385	0.52208	1	7.5553	2.21e-10	1.24e-08	7.98053	8.71e-16	1.67e-14	0	1	1	0	1	1	0	0	0	0.039	0.673	1.023
14858	Gsta2	NM_008182	chr9	78178827	78194952	-	846	1	Gsta2|Gst2-2|Gstc-2|Gstc2|-|9 E1|9 43.65 cM|protein-coding	4.3149	0.0794049	0.983269	8.51231	4.32e-17	5.44e-15	8.36449	1.28e-19	3.15e-18	0	1	1	0	1	1	0	0	0	0.078	1.326	1.346
14860	Gsta4	NM_010357	chr9	78039773	78057156	+	949	1	Gsta4|GST5.7|mGsta4|-|9|9 E1|protein-coding	-0.061652	0.69719	1	-0.160037	0.530058	1	-1.06252	3.63e-09	3.73e-08	0.0639438	0.683949	1	0.12812	0.431648	1	75.469	78.846	69.174	69.22	59.119	38.424
14873	Gsto1	NM_010362	chr19	47929479	47939278	+	1153	1	Gsto1|AA407097|AI194287|AU018802|GSTO 1-1|GSTX|SPG-R|p28|-|19|19 D1|protein-coding	0.219824	0.207069	1	0.620546	0.025002	0.18853	2.03417	6.19e-29	2.47e-27	-0.341417	0.0438027	1	-0.364485	0.0348632	1	42.819	41.416	51.563	62.392	74.797	248.066
14872	Gstt2	NM_010361	chr10	75294590	75297626	-	1363	1	Gstt2|AI266894|Yrs|mGSTT2|-|10 38.58 cM|10 B5-C1|protein-coding	-0.179663	0.393832	1	-0.0801417	0.818541	1	-1.08611	7.57e-08	6.68e-07	-0.265736	0.186117	1	-0.141746	0.466496	1	4.877	5.176	5.605	5.284	4.864	3.085
227835	Gtdc1	NM_172662	chr2	44419932	44717142	-	2551	1	Gtdc1|E330008O22Rik|-|2|2 B|protein-coding	0.0125476	0.978333	1	1.1169	2.28e-05	0.000534747	1.4575	8.95e-15	1.59e-13	0.00900807	0.981494	1	-0.132975	0.512326	1	1.522	1.364	1.451	1.515	3.093	4.636
57080	Gtf2ird1	NM_001081462	chr5	134833531	134932586	-	4659	1	Gtf2ird1|1700012P16Rik|BEN|Cream1|ESTM9|GTF3|Gtf2il|MusTRD1|Tg(Alb1-Myc)166.8Sst|WBSCR11|X83320|-|5 G2|5 74.55 cM|protein-coding	0.412614	0.634805	1	2.63572	1.05e-06	3.24e-05	5.86119	8.78e-78	1.7e-75	-1.15734	0.162613	1	-3.66084	0.00392704	0.290565	0.024	0.004	0.048	0.072	0.301	3.432
66596	Gtf3a	NM_025652	chr5	147760233	147767190	+	1287	1	Gtf3a|2010015D03Rik|2610111I01Rik|5330403M05Rik|-|5|5 G2|protein-coding	-0.0386162	0.820154	1	-0.436982	0.0998116	0.502181	-1.10373	1.3e-10	1.58e-09	-0.111506	0.50033	1	-0.0476292	0.779365	1	66.848	69.224	68.744	69.912	48.625	37.468
56055	Gtpbp2	NM_019581	chr17	46297981	46306319	+	2952	1	Gtpbp2|nmf205|-|17|17 C-D|protein-coding	0.0178448	0.912998	1	0.569892	0.0182812	0.150395	1.08776	1.46e-11	1.98e-10	0.0329141	0.84709	1	0.10535	0.547044	1	8.039	8.098	7.597	7.882	11.077	18.679
107999	Gtpbp6	NM_145147	chr5	110532996	110537216	-	1603	1	Gtpbp6|AV119224|Pgbpll|pgpl|-|5|5 E|protein-coding	0.0439372	0.785265	1	0.442928	0.106269	0.52184	1.01799	9.18e-11	1.13e-09	0.0422596	0.814077	1	0.142576	0.401876	1	12.625	13.045	11.791	12.586	14.704	27.783
234889	Gucy1a2	NM_001033322	chr9	3532349	3905787	+	13713	1	Gucy1a2|6330407I18Rik|A230060L24Rik|-|9|9 A1|protein-coding	5.13e-15	1	1	5.13e-15	1	1	5.22745	0.00796771	0.0289604	0	1	1	0	1	1	0	0	0	0	0	0.009
60596	Gucy1a3	NM_021896	chr3	81896349	81949799	-	4643	1	Gucy1a3|1200016O07Rik|sGC-alpha1|-|3|3 E3|protein-coding	-3.02713	0.543343	1	-3.15625	0.567722	1	4.70711	5.93e-12	8.32e-11	-0.919677	1	1	-3.20268	0.544116	1	0.003	0	0.005	0	0	0.173
14919	Gucy2e	NM_008192	chr11	69031619	69050524	-	8310	1	Gucy2e|GC-E|GC1|ROS-GC1|-|11 B3|11 42.51 cM|protein-coding	-1.80046	0.000163557	0.00993193	-7.76767	6.78e-12	4.77e-10	-4.09751	5.9e-11	7.48e-10	0.448844	0.167759	1	0.279483	0.42249	1	0.115	0.1	0.081	0.024	0	0.005
14938	Gzma	NM_010370	chr13	113884035	113891189	-	871	1	Gzma|AW494114|Ctla-3|Ctla3|Hf|SE1|TSP-1|TSP1|-|13 63.93 cM|13 D|protein-coding	-0.686483	0.00157864	0.0628501	-3.0596	3.37e-13	2.84e-11	-4.73953	7.46e-58	8.42e-56	-0.266538	0.20872	1	-0.337325	0.117395	1	251.1	233.961	284.338	185.027	29.741	12.561
14960	H2-Aa	NM_010378	chr17	34419696	34424716	-	1062	1	H2-Aa|Aalpha|H-2Aa|H2Aa|I-Aalpha|IAalpha|Ia-1|Ia1|-|17 B1|17 17.98 cM|protein-coding	3.32143	7.91e-06	0.00073737	3.85613	0.000147598	0.00283943	2.93455	0.000285236	0.0014021	-0.0570025	1	1	4.0255	8.12e-09	5.74e-06	0.033	0.626	0.033	0.372	0.432	0.318
14963	H2-Bl	NM_008199	chr17	36217134	36221194	-	1156	1	H2-Bl|H2-B1|H2-Bl-like|-|17 B1|17 18.89 cM|protein-coding	-0.00178357	1	1	0.603151	0.0239284	0.182495	1.01903	3.25e-08	2.99e-07	0.290452	0.179063	1	0.233025	0.246237	1	6.066	5.601	4.779	4.907	7.322	11.265
14964	H2-D1	NM_010380	chr17	35400039	35404442	+	1726	1	H2-D1|H-2D|H2-D|-|17 B1|17 18.61 cM|protein-coding	-0.211561	0.274414	1	0.597413	0.0224491	0.174873	1.11482	2.78e-09	2.89e-08	0.0437393	0.846723	1	0.136889	0.538687	1	8.03	8.112	7.416	6.735	11.286	18.878
14998	H2-DMa	NM_010386	chr17	34259777	34276046	+	1650	1	H2-DMa|H-2Ma|H2-Ma|-|17 B1|17 17.98 cM|protein-coding	0.413511	0.0934707	1	0.682589	0.0201927	0.162345	1.17495	1.68e-08	1.6e-07	-0.168487	0.459845	1	-0.425403	0.0687229	1	1.262	1.04	1.361	1.844	2.194	3.58
14999	H2-DMb1	NM_010387	chr17	34290136	34297174	+	1276	1	H2-DMb1|AI385589|H-2Mb1|H2-Mb1|-|17 B1|17 17.98 cM|protein-coding	1.80515	0.0996935	1	5.04415	8.1e-18	1.08e-15	4.76522	6.94e-18	1.53e-16	-1.85629	0.433945	1	2.31085	0.00389829	0.290565	0.009	0.199	0.037	0.142	1.269	1.245
15000	H2-DMb2	NM_010388	chr17	34282361	34288040	+	779	1	H2-DMb2|H-2Mb2|H2-Mb2|-|17 B1|17 17.98 cM|protein-coding	2.95922	0.00171507	0.0669126	5.6989	1.44e-18	2.09e-16	5.40997	3.23e-18	7.34e-17	-0.899516	1	1	3.78272	8.35e-06	0.00233494	0.015	0.496	0.03	0.274	1.718	1.679
14969	H2-Eb1	NM_010382	chr17	34442812	34453619	+	1661	1	H2-Eb1|Eb|H-2Eb|H2Eb|Ia-4|Ia4|-|17 B1|17 17.98 cM|protein-coding	0.868645	0.0431539	0.698569	1.48586	0.000677266	0.0104065	4.45592	1.88e-62	2.47e-60	-1.74973	0.00200649	0.236946	1.02031	0.0216399	0.871648	0.071	0.509	0.234	0.426	0.614	5.986
381091	H2-Eb2	NM_001033978	chr17	34462620	34478355	+	3373	1	H2-Eb2|A130038H09Rik|H-2Eb2|Ia-5|Ia5|Iebeta2|-|17 B1|17 17.98 cM|protein-coding	-0.512725	0.0035636	0.118198	-1.78578	1.11e-10	6.52e-09	-1.83341	1.51e-10	1.82e-09	0.267747	0.148084	1	0.134707	0.49776	1	3.377	3.102	2.69	1.965	0.779	0.871
14980	H2-L	NM_001267808	chr17	35400068	35403675	+	1052	1	H2-L|H-2L|-|-|protein-coding	-0.202156	0.2859	1	0.523565	0.0460445	0.294712	1.0324	2.73e-08	2.53e-07	0.0389546	0.86159	1	0.118706	0.593135	1	11.889	11.885	11.028	10.05	15.984	26.481
333715	H2-M10.2	NM_177923	chr17	36421226	36423366	-	984	1	H2-M10.2|4.7H|-|17 B1|17 19.01 cM|protein-coding	0.501049	0.409186	1	0.993363	0.0386946	0.261322	1.06343	0.00772165	0.0281679	0.764058	0.154356	1	0.317193	0.47598	1	0.526	0.381	0.299	0.451	0.57	0.729
399549	H2-M10.6	NM_201611	chr17	36949120	36952511	+	1397	1	H2-M10.6|-|-|17|17 B1|protein-coding	0.396388	0.535833	1	1.0296	0.0341284	0.238195	1.03435	0.0144499	0.0493925	0.65707	0.24171	1	0.315221	0.557083	1	0.345	0.268	0.21	0.294	0.411	0.503
15001	H2-Oa	NM_008206	chr17	34229324	34232179	+	1042	1	H2-Oa|H-2Oa|-|17 B1|17 17.98 cM|protein-coding	0.101334	0.739202	1	1.39534	1.08e-05	0.000270543	3.08687	3.05e-38	1.85e-36	-0.489657	0.0809939	1	-0.126364	0.685526	1	0.915	1.171	1.23	1.373	3.254	12.241
15006	H2-Q1	NM_010390	chr17	35457503	35462044	+	2014	1	H2-Q1|H-2Q1|Q1|Q1b|Q1d|Q1k|Qa-1|Qa1|Qed-1|-|17 B1|17 18.63 cM|protein-coding	-0.0412589	0.824567	1	0.558193	0.0313488	0.223759	1.04435	1.03e-09	1.13e-08	0.200747	0.333618	1	0.195615	0.325579	1	5.977	5.68	4.99	5.021	7.488	12.003
15007	H2-Q10	NM_010391	chr17	35607034	35611508	+	1464	1	H2-Q10|H-2Q10|Q10|Qa10|-|17 B1|17 18.68 cM|protein-coding	0.139168	0.502714	1	0.799412	0.00362544	0.0420304	1.41785	1.03e-13	1.69e-12	0.206822	0.329598	1	0.376231	0.0955161	1	2.773	2.979	2.304	2.628	4.023	7.175
15016	H2-Q5	NR_051981	chr17	35531044	35532575	+	1178	1	H2-Q5|H-2Q5|Qa-5|Qa5|Qat-5|-|17 B1|17 18.65 cM|pseudo	-0.17114	0.528896	1	0.440147	0.150478	0.659956	1.03034	6.88e-06	4.54e-05	-0.0391341	0.905327	1	-0.00141837	1	1	1.868	1.866	1.836	1.745	2.457	4.381
110557	H2-Q6	NM_207648	chr17	35561822	35565306	+	975	1	H2-Q6|0610037M15Rik|H-2Q6|Qa-6|Qa6|-|17 B1|17 18.66 cM|protein-coding	0.00860116	0.973284	1	0.606565	0.0308486	0.221119	1.161	5.49e-10	6.22e-09	0.207344	0.406234	1	0.328643	0.110536	1	7.663	8.041	6.353	6.645	9.924	16.616
15018	H2-Q7	NM_010394	chr17	35576100	35580718	+	1527	1	H2-Q7|H-2Q7|Ped|Q9|Qa-2|Qa-7|Qa7|-|17 B1|17 18.67 cM|protein-coding	-0.0588134	0.781938	1	0.662915	0.0157112	0.134207	1.19168	6.72e-10	7.54e-09	0.194956	0.445044	1	0.176483	0.388445	1	4.386	4.221	3.64	3.671	5.827	9.787
15019	H2-Q8	NM_023124	chr17	35561792	35565306	+	1005	1	H2-Q8|H-2Q8|MMS10-T|Ms10t|Qa-2|Qa-8|Qa8|-|17 B1|17|protein-coding	0.00480198	1	1	0.600126	0.031832	0.226001	1.158	5.47e-10	6.2e-09	0.206175	0.408157	1	0.324197	0.112588	1	7.469	7.825	6.199	6.463	9.64	16.176
110558	H2-Q9	NM_001201460	chr17	35576112	35580715	+	1512	1	H2-Q9|H-2Q9|Ped|Qa-2|Qa-9|Qa9|-|17|17|protein-coding	-0.0588138	0.781952	1	0.662916	0.0156912	0.134108	1.19168	6.72e-10	7.54e-09	0.194955	0.445089	1	0.178908	0.379867	1	4.093	3.947	3.42	3.426	5.455	9.143
15043	H2-T3	NM_008208	chr17	36322516	36327096	-	2170	1	H2-T3|H-2T3|H2-Tw3|MumuTL|TL|-|17 B1|17 18.99 cM|protein-coding	-0.507723	0.00280401	0.0989276	-1.08297	1.97e-05	0.000466744	-1.92625	1.63e-25	5.58e-24	0.0458664	0.783063	1	0.0210742	0.910392	1	7.401	7.226	6.879	5.077	3.149	2.106
667281	H60b	NM_001177775	chr10	21993280	22008654	+	943	1	H60b|EG667281|-|10|10 A3|protein-coding	0.202631	0.741059	1	0.79265	0.0768796	0.421331	1.13876	0.000206777	0.00104505	-0.175613	0.675209	1	-0.122311	0.727265	1	0.724	0.743	0.773	0.959	1.419	1.998
670558	H60c	NM_001204916	chr10	7078770	7090333	+	2809	1	H60c|4632413I24Rik|Gm9491|-|10 A1|10|protein-coding	0.2914	0.811943	1	0.994052	0.116167	0.552833	1.59301	8.9e-05	0.000481143	-0.510681	0.464403	1	0.153017	1	1	0.067	0.108	0.092	0.123	0.2	0.325
100198	H6pd	NM_173371	chr4	149353583	149383132	-	4739	1	H6pd|AI785303|G6pd1|Gpd-1|Gpd1|-|4 E2|4 80.65 cM|protein-coding	-0.222593	0.160458	1	-0.994572	7.81e-05	0.00161221	-1.25598	4.74e-13	7.35e-12	-0.0405058	0.79339	1	0.00240109	0.989805	1	6.428	6.508	6.364	5.687	3.247	3.083
107766	Haao	NM_025325	chr17	84230694	84246130	-	1212	1	Haao|0610007K21Rik|0610012J07Rik|3-HAO|3-HAOxase|3HAO|-|17|17 E4|protein-coding	2.62361	0.000110756	0.00710228	5.21209	1.75e-23	3.83e-21	7.74241	8.35e-108	2.58e-105	-2.11694	0.246174	1	-0.621228	1	1	0.01	0.03	0.048	0.326	1.841	12.67
15109	Hal	NM_010401	chr10	92951513	92979488	+	2736	1	Hal|Hsd|his|histidase|-|10 48.49 cM|10 C2-D1|protein-coding	1.09166	0.0335117	0.60409	3.91584	4.88e-16	5.61e-14	5.03621	2.91e-36	1.63e-34	0.0171392	1	1	-0.305295	0.894255	1	0.095	0.071	0.09	0.192	1.458	3.485
12950	Hapln1	NM_013500	chr13	89680241	89751437	+	5048	1	Hapln1|BB099155|CLP|Crtl1|Crtl1l|LP|LP-1|-|13 C3|13 45.5 cM|protein-coding	0.928621	0.711125	1	2.19055	0.110249	0.533755	5.22732	6.34e-17	1.32e-15	-3.2232	0.532595	1	0.0705319	1	1	0	0.005	0.005	0.01	0.023	0.228
15122	Hba-a1	NM_008218	chr11	32183672	32184486	+	554	2	Hba-a1|Hba|Hba1|Hbat1|-|11 A4|11 18.86 cM|protein-coding	0.558072	0.805086	1	2.76525	1.64e-05	0.000395238	2.97488	7.5e-06	4.92e-05	0.336336	0.807168	1	-4.65349	0.0447998	1	0.17	0	0.127	0.208	0.897	1.218
110257	Hba-a2	NM_001083955	chr11	32183675	32184493	+	558	2	Hba-a2|-|-|11|11 18.87 cM|protein-coding	0.558009	0.805116	1	2.76524	1.64e-05	0.000395465	2.97487	7.52e-06	4.93e-05	0.336321	0.807197	1	-4.65351	0.0448226	1	0.169	0	0.126	0.206	0.891	1.21
73389	Hbp1	NM_153198	chr12	32611320	32635400	-	2928	1	Hbp1|1700058O05Rik|BE629963|C330012F01Rik|C86454|-|12|12 A3|protein-coding	0.0540071	0.744118	1	0.842469	0.000913903	0.0133678	1.99951	3.72e-35	2.01e-33	-0.0210913	0.903489	1	-0.126964	0.460385	1	5.047	4.679	4.926	5.29	9.004	22.833
15184	Hdac5	NM_001284248	chr11	102057061	102091486	-	4283	1	Hdac5|AI426555|Hdac4|mHDA1|mKIAA0600|-|11|11 D|protein-coding	-0.520714	0.0132584	0.326329	-0.057598	0.840413	1	1.61009	2.51e-15	4.62e-14	0.376293	0.102423	1	0.287951	0.267031	1	1.225	1.068	0.908	0.659	0.873	3.159
56233	Hdac7	NM_001204275	chr15	97623095	97674933	-	4312	1	Hdac7|5830434K02Rik|HD7|HD7a|Hdac7a|mFLJ00062|-|15|15 F2|protein-coding	-0.467975	0.00912591	0.246851	-1.53562	1.3e-08	5.61e-07	-1.34792	1.72e-12	2.56e-11	0.106862	0.526158	1	0.0938598	0.583348	1	52.082	50.781	46.982	35.715	16.583	21.733
79221	Hdac9	NM_024124	chr12	35056362	35213754	-	4414	1	Hdac9|AV022454|D030072B18Rik|HD7B|HD9|HDRP|Hdac7b|Mitr|mKIAA0744|-|12|12 A3|protein-coding	5.13e-15	1	1	3.11977	0.565539	1	8.46288	3.91e-17	8.24e-16	0	1	1	2.27772	1	1	0	0.003	0	0	0.006	0.277
[truncated: 2,116 more rows]

## Sheet: Legend
	Table S2: Kinetic responses to PU.1-ERT2 mobilization in stably transduced Scid.adh.2C2 cells: Time course following 4OHT
[truncated: 3 more rows]
