# Supplementary material for: Pioneering, chromatin remodeling, and epigenetic constraint in early T-cell gene regulation by SPI1 (PU.1)
Source: HighWire-hosted journal article supplement (doi:10.1101/gr.231423.117), 2018-08-31
Supplement: Supplemental_Table_S3.xlsx [file Supplemental_Table_S3.xlsx]

## Sheet: PU1WTHA25
Table S3: Differentially expressed genes in PU1WTHA, PU1ENGHA and PU1ETSHA transduced DN2b/3 cells
DEGs in PU1WTHA25 cells (vs EVGFP)
GeneID	TranscriptID.x	Genes	log2FC_PU1WTHA25_vs_EVGFP	pvalue_PU1WTHA25_vs_EVGFP	padj_PU1WTHA25_vs_EVGFP	log2FC_PU1ENGHA_vs_EVGFP	pvalue_PU1ENGHA_vs_EVGFP	padj_PU1ENGHA_vs_EVGFP	log2FC_PU1ETSHA_vs_EVGFP	pvalue_PU1ETSHA_vs_EVGFP	padj_PU1ETSHA_vs_EVGFP	log2FC_PU1WTHA44_vs_EVGFP	pvalue_PU1WTHA44_vs_EVGFP	padj_PU1WTHA44_vs_EVGFP	EVGFP_rpkm (mean of four)	PU1WTHA25_rpkm (mean of four)	PU1ENGHA_rpkm (mean of four)	PU1ETSHA_rpkm (mean of four)	PU1WTHA44_rpkm (mean of four)	Genes_PU1WTHAaHA_CD25_peaks (1 gene with PU1 peak, 0 gene with no peak)
58520	NM_021446	0610007P14Rik	0.301854	0.0026692	0.0356341	-0.158124	0.11824	0.654312	0.0450237	0.655728	0.999991	0.0252119	0.80278	0.877236	27.538	31.063	24.701	27.492	27.619	0
68480	NM_026738	1110007C09Rik	0.725591	0.000807708	0.0140749	-0.23377	0.285653	0.854607	0.117479	0.590124	0.999991	1.41242	5.77975e-11	6.65779e-10	9.521	14.655	8.069	10.087	25.986	1
73737	NM_198001	1110008P14Rik	0.724029	0.00138983	0.0213666	0.479806	0.0346871	0.364098	0.104355	0.648291	0.999991	1.31764	4.93714e-09	4.61862e-08	7.324	11.28	10.349	7.638	18.672	0
100043489	NR_037957	1300002E11Rik	-0.434077	0.00723368	0.0759703	0.178381	0.265537	0.838754	0.129444	0.419795	0.999991	-1.83736	9.38096e-28	3.79137e-26	9.835	7.683	12.76	10.87	2.877	1
69781	NR_037959	1600010M07Rik	1.52944	0.00672406	0.0721029	0.112391	0.847976	0.980097	0.0262697	0.964417	0.999991	4.60456	3.15089e-17	6.37505e-16	0	0.238	0.012	0	3.715	1
75462	NM_029296	1700001C19Rik	-0.956008	0.00920259	0.0904902	0.211569	0.539919	0.933437	0.108165	0.755655	0.999991	-0.908353	0.0132047	0.0328924	0.434	0.18	0.513	0.465	0.203	1
74230	NM_198637	1700016K19Rik	1.74399	0.000769562	0.0134878	-0.493075	0.377691	0.89915	-0.435574	0.436004	0.999991	2.71683	1.03514e-07	8.10174e-07	0.059	0.378	0.017	0.017	0.922	1
69987	NM_027283	1700026L06Rik	1.31943	0.00076892	0.0134878	0.115782	0.773778	0.975796	0.103243	0.79823	0.999991	3.77488	1.12428e-22	3.28346e-21	0.742	2.016	0.824	0.785	14.337	1
27660	NM_138581	1700088E04Rik	0.612127	0.000359824	0.00712264	0.466495	0.00678412	0.124639	0.202227	0.246009	0.999991	0.956466	1.90191e-08	1.65466e-07	3.133	4.432	4.387	3.504	6.116	0
66276	NR_104416	1810009A15Rik	0.531225	0.00547403	0.0618606	0.135642	0.478853	0.920652	0.169769	0.375531	0.999991	0.336884	0.078393	0.150854	41.635	55.571	45.89	45.875	52.371	1
72097	NM_028096	2010300C02Rik	0.944516	0.0027829	0.0367406	0.439612	0.167488	0.746013	-0.0796053	0.805298	0.999991	-0.861847	0.00931108	0.0243609	0.336	0.628	0.468	0.308	0.17	1
66421	NM_025555	2410004B18Rik	0.403879	0.00125244	0.0199639	0.296954	0.0179754	0.248564	0.19563	0.120769	0.999991	0.111811	0.375732	0.523868	10.918	13.256	13.463	12.172	11.667	1
72386	NR_015556	2610035D17Rik	-0.812654	3.68522e-05	0.00101464	0.221071	0.251587	0.827968	0.193981	0.315121	0.999991	-0.585819	0.00278746	0.00850124	4.3	2.195	5.018	4.788	2.79	1
243219	NM_172884	2900026A02Rik	0.808534	0.00194709	0.0278422	0.430886	0.0990018	0.611877	0.534959	0.0405274	0.999991	2.8048	4.76956e-27	1.82502e-25	3.236	5.321	4.465	4.637	24.524	1
620760	NR_015468	2900079G21Rik	-0.904893	0.000860319	0.0146875	-0.0528331	0.844329	0.979674	0.358573	0.181586	0.999991	-4.27312	1.40767e-41	1.18115e-39	7.338	3.471	7.279	9.164	0.308	1
73205	NM_001081343	3110043O21Rik	1.07736	1.94721e-07	9.63612e-06	0.899929	1.6228e-05	0.00104787	0.444489	0.0387541	0.999991	3.25237	1.39995e-61	2.46183e-59	0.365	0.734	0.709	0.488	3.718	1
654804	NR_073028	4732471J01Rik	1.44434	2.45261e-09	1.69588e-07	-0.140839	0.584842	0.940731	-0.130403	0.614237	0.999991	3.44319	2.97859e-48	3.3956e-46	1.195	3.158	1.072	1.041	14.305	0
74597	NR_015506	4833418N02Rik	1.41889	2.99151e-06	0.00011022	0.010715	0.97331	0.995097	0.374	0.235956	0.999991	1.66336	3.73076e-08	3.12093e-07	0.429	1.16	0.434	0.553	1.503	1
432479	NM_001014836	4930404N11Rik	0.574746	0.000838917	0.0143707	0.144218	0.405481	0.905371	-0.342106	0.0514542	0.999991	1.27063	9.91481e-14	1.48587e-12	11.189	15.381	12.434	8.507	27.214	1
74684	NR_073370	4930451G09Rik	3.28631	2.35858e-21	7.28898e-19	0.119982	0.74039	0.969178	0.695173	0.0515587	0.999991	1.44159	4.17492e-05	0.000198309	0.258	2.882	0.286	0.413	0.752	1
67647	NM_001162896	4930523C07Rik	-0.546483	0.000610986	0.0111472	0.133753	0.399088	0.905071	-0.0439207	0.782222	0.999991	-0.925748	7.56088e-09	6.92034e-08	7.327	4.553	8.084	6.939	3.756	1
75255	NR_038030	4930562F07Rik	-0.60397	0.00403475	0.0491143	0.0907822	0.661084	0.95142	-0.0238737	0.908507	0.999991	-1.06475	5.85095e-07	4.03152e-06	7.897	4.68	8.475	7.597	3.619	1
545732	NM_001177510	4933402N22Rik	1.82378	0.000162001	0.00360761	0.48877	0.319251	0.872945	-0.356009	0.4767	0.999991	0.980266	0.0443524	0.0934657	0.287	1.329	0.456	0.188	0.699	1
74454	NR_045810	4933408J17Rik	0.399117	0.00407103	0.0494764	0.321448	0.0207753	0.271629	0.104102	0.45526	0.999991	-0.522476	0.000199751	0.000813672	13.216	16.01	16.543	13.795	9.04	0
271221	NM_198642	5031414D18Rik	1.41576	0.00136004	0.0211232	-0.434338	0.38208	0.900177	0.896888	0.0488617	0.999991	5.20475	1.76748e-36	1.09425e-34	0.026	0.111	0.012	0.073	2.173	1
223739	NM_001033273	5031439G07Rik	1.02447	9.92132e-05	0.00238474	-0.645464	0.0144105	0.213462	-0.206145	0.434186	0.999991	1.61757	7.8435e-10	8.06801e-09	8.607	16.568	5.407	7.176	27.605	1
71398	NM_001163539	5430427O19Rik	1.0416	0.000158084	0.00353078	-1.05437	0.000187994	0.00796829	-0.78474	0.00526516	0.746249	1.49575	5.45852e-08	4.45137e-07	1.395	2.737	0.639	0.75	4.119	1
67313	NM_028872	5730559C18Rik	0.612249	0.00525019	0.060321	-0.0324697	0.882491	0.984451	0.0106685	0.961268	0.999991	-0.83339	0.000155645	0.000649538	11.898	16.86	11.674	11.629	6.446	1
76133	NR_029446	6230400D17Rik	0.504426	0.00644048	0.0700107	0.292191	0.118295	0.654312	0.222493	0.237783	0.999991	-0.138936	0.469646	0.611568	2.041	2.68	2.517	2.312	1.822	0
69004	NR_045821	6330418K02Rik	0.962029	0.000243836	0.00512835	-0.318033	0.250772	0.826934	-0.10127	0.712274	0.999991	1.87274	3.31495e-13	4.68743e-12	1.534	2.866	1.205	1.37	6.006	0
320893	NR_015515	6430562O15Rik	0.545763	1.99968e-05	0.000597261	0.0775956	0.551689	0.93664	0.13911	0.286116	0.999991	0.0759112	0.560855	0.693362	3.71	4.979	3.922	3.967	3.863	1
100042056	NR_033635	9130019P16Rik	1.05808	0.00126588	0.0201146	-0.722574	0.0332764	0.354781	-0.402203	0.232687	0.999991	2.9522	9.75669e-20	2.33398e-18	0.37	0.757	0.209	0.26	3.355	0
75758	NM_029418	9130401M01Rik	0.44093	0.00700614	0.0742866	0.207796	0.204815	0.782491	0.165005	0.314606	0.999991	0.3423	0.0365328	0.0793856	12.155	15.163	14.079	13.271	15.296	1
319482	NM_001164655	9530053A07Rik	3.25155	3.56627e-18	8.18242e-16	0.628941	0.118122	0.654287	1.5349	7.73176e-05	0.0410943	0.884973	0.0261424	0.059457	0.023	0.302	0.042	0.086	0.052	1
268759	NM_001112735	9930012K11Rik	-0.80192	8.4853e-05	0.00209613	0.00321596	0.987167	0.995097	0.272452	0.171466	0.999991	-0.513432	0.0112149	0.0286527	3.207	1.648	3.219	3.788	2.195	1
667214	NM_001114679	9930111J21Rik1	1.28172	2.24904e-06	8.49306e-05	-0.692862	0.0112793	0.182126	-0.288925	0.289492	0.999991	3.33735	5.2521e-35	2.98341e-33	2.899	6.783	1.748	2.276	32.665	1
245240	NM_173434	9930111J21Rik2	1.50416	1.51255e-08	9.42574e-07	-0.56088	0.0364118	0.374885	-0.1212	0.650349	0.999991	3.50753	6.19929e-40	4.63684e-38	4.68	12.836	3.11	4.147	59.364	0
319278	NM_175687	A230050P20Rik	0.761638	0.000129407	0.00298722	0.118165	0.554627	0.93664	-0.0426595	0.831495	0.999991	0.700822	0.000431608	0.00163111	6.901	10.891	7.506	6.462	11.267	0
328830	NM_178796	A530064D06Rik	1.96439	1.18269e-05	0.000381052	-0.0184213	0.969981	0.995097	-0.537685	0.290715	0.999991	5.35941	2.23993e-35	1.29916e-33	0.045	0.263	0.044	0.013	3.917	1
100503120	NR_077219	A930006K02Rik	-0.724335	0.00535508	0.0612478	-0.103718	0.68256	0.955565	0.204431	0.416719	0.999991	-1.29376	1.53124e-06	9.88724e-06	2.888	1.546	2.674	3.229	1.08	1
109202	NR_045820	A930024E05Rik	-0.699307	0.00952192	0.0927867	0.643215	0.0133706	0.204008	-0.0935268	0.723978	0.999991	0.111072	0.672867	0.786153	1.284	0.698	2.056	1.144	1.375	1
69684	NM_144829	Aarsd1	0.514768	0.000135223	0.00308852	0.249176	0.0650754	0.50905	0.0911613	0.500398	0.999991	-0.517642	0.000140333	0.000591929	29.505	38.732	35.073	30.629	20.267	0
382062	NM_001198794	AB124611	0.6564	0.000562536	0.010465	-0.6592	0.000602366	0.0203811	-0.0497353	0.794771	0.999991	1.32708	2.75593e-12	3.60692e-11	14.662	21.352	9.206	13.747	37.052	1
268379	NM_178259	Abca13	1.47479	0.00851281	0.0857681	-0.0779502	0.891933	0.985925	-0.413799	0.474566	0.999991	2.00103	0.000336458	0.00130739	0.005	0.025	0.004	0.002	0.043	1
18669	NM_011075	Abcb1b	0.775923	0.00330992	0.0419432	-0.426936	0.108329	0.631956	-0.0484874	0.854982	0.999991	1.88058	9.45527e-13	1.28427e-11	2.439	3.924	1.795	2.271	9.487	1
18670	NM_008830	Abcb4	2.2085	1.2781e-16	2.27697e-14	-0.861291	0.00214602	0.0532791	-0.236139	0.391862	0.999991	3.07212	7.48369e-31	3.3985e-29	0.638	2.939	0.333	0.515	5.936	1
20928	NM_011511	Abcc9	1.27456	0.000697943	0.0125522	-0.156281	0.694814	0.957501	0.596102	0.121922	0.999991	0.582791	0.130008	0.229745	0.047	0.122	0.042	0.076	0.076	1
19299	NM_008991	Abcd3	0.570409	0.00369176	0.0458848	-0.267085	0.175733	0.75464	0.0480885	0.807129	0.999991	0.389179	0.047778	0.0993546	7.147	9.799	5.939	7.207	9.322	1
27407	NM_013853	Abcf2	0.368346	0.0037059	0.0459611	-0.0685899	0.589359	0.940731	0.0365272	0.773746	0.999991	-0.492756	0.000108286	0.00046956	41.931	49.637	40.132	41.876	29.349	1
27405	NM_030239	Abcg3	0.486731	0.00124646	0.0199264	-1.09873	7.20604e-13	3.30588e-10	-0.0225585	0.881529	0.999991	1.80065	3.66008e-33	1.88477e-31	9.829	12.671	4.537	9.369	34.418	1
76192	NM_024465	Abhd12	0.446753	0.000602222	0.0110423	0.0703562	0.590647	0.941099	0.0357201	0.785087	0.999991	1.47707	3.05853e-30	1.35907e-28	11.281	14.109	11.862	11.206	31.431	1
66082	NM_025341	Abhd6	0.626022	3.46213e-05	0.000961964	-0.266789	0.086996	0.579651	0.115735	0.452125	0.999991	1.54915	1.87587e-25	6.6541e-24	2.817	4.005	2.337	2.966	8.272	1
226251	NM_001103178	Ablim1	-0.84827	1.62768e-09	1.17933e-07	0.295653	0.0353763	0.36757	0.206898	0.14095	0.999991	-2.02693	6.92753e-47	7.58358e-45	68.757	34.634	85.204	77.34	16.312	1
109934	NM_198018	Abr	0.594423	0.000170357	0.00377704	-0.626208	7.67086e-05	0.00382269	0.125875	0.426224	0.999991	1.22652	8.49902e-15	1.4077e-13	35.394	49.035	22.903	37.394	81.421	1
73112	NM_028440	Abracl	0.367377	0.00890858	0.0884608	-0.069131	0.623231	0.947856	-0.417166	0.0031008	0.604546	0.130965	0.351626	0.497721	70.418	83.245	66.89	50.982	76.111	1
80283	NM_030251	Abtb1	-0.687888	9.80149e-05	0.00235968	0.736357	2.70067e-05	0.00162645	0.0657044	0.708748	0.999991	-0.442594	0.0120721	0.0305032	19.329	10.846	32.499	19.569	13.946	1
99382	NM_178890	Abtb2	-0.818656	4.72924e-06	0.000167325	-0.0705624	0.692509	0.956791	0.136121	0.445395	0.999991	-2.24181	2.62251e-35	1.51046e-33	14.25	7.289	13.632	15.264	2.864	1
66948	NM_025862	Acad8	0.375543	0.00209633	0.0296403	0.160125	0.191574	0.77338	0.185992	0.129676	0.999991	0.322592	0.00832938	0.022118	5.055	6.015	5.67	5.61	6.266	1
11363	NM_007381	Acadl	-0.692631	1.30806e-07	6.64697e-06	-0.0542417	0.67846	0.954969	-0.0946729	0.469522	0.999991	-0.468745	0.000349421	0.00135078	43.27	24.316	41.699	39.286	30.747	1
110460	NM_009338	Acat2	0.232874	0.00290197	0.0378707	-0.295862	0.000168617	0.00724542	-0.00104081	0.989413	0.999991	-0.759997	8.62224e-22	2.39942e-20	40.508	43.569	33.034	39.254	23.57	0
66190	NM_025408	Acer3	1.37625	2.38615e-15	3.64985e-13	-0.0489325	0.780732	0.976764	0.175687	0.316704	0.999991	1.23837	1.07857e-12	1.45898e-11	3.298	7.988	3.198	3.608	7.819	1
70025	NM_133348	Acot7	0.667354	1.83541e-06	7.18179e-05	0.0503358	0.719244	0.962106	-0.0745584	0.594571	0.999991	-0.155767	0.266213	0.404867	86.606	125.174	90	79.531	76.473	1
93732	NM_053115	Acox2	-1.56483	0.00126478	0.0201146	-0.0386006	0.932083	0.990705	0.446791	0.318217	0.999991	-2.5319	9.77541e-07	6.51826e-06	0.174	0.031	0.163	0.227	0	1
80911	NM_030721	Acox3	0.529826	0.000562274	0.010465	-0.0554174	0.719267	0.962106	0.0231684	0.880545	0.999991	1.79256	1.01077e-31	4.77374e-30	7.412	9.846	7.172	7.311	25.882	1
11433	NM_001102404	Acp5	-0.68309	8.94915e-09	5.71802e-07	0.294324	0.0122392	0.193618	-0.164321	0.164097	0.999991	-1.14895	9.39449e-22	2.59684e-20	28.515	16.096	34.937	24.56	12.388	1
14081	NM_007981	Acsl1	0.694068	3.06684e-05	0.000864825	-0.175747	0.296938	0.860354	0.13711	0.413937	0.999991	1.59037	6.9082e-22	1.93547e-20	2.867	4.288	2.545	3.069	8.75	1
60525	NM_019811	Acss2	-0.318673	0.00487667	0.0571575	0.336431	0.00264466	0.0631722	0.0172069	0.878558	0.999991	-0.818654	9.70792e-13	1.3175e-11	8.463	6.194	10.741	8.31	4.708	1
11465	NM_009609	Actg1	0.679038	4.18229e-06	0.000150077	-0.293885	0.046427	0.426232	-0.370398	0.0120767	0.999991	1.16149	3.48425e-15	5.9932e-14	751.185	1106.41	612.564	563.021	1680.52	0
109711	NM_134156	Actn1	0.706989	6.71458e-06	0.000230564	-0.217713	0.165933	0.744708	0.228183	0.146337	0.999991	1.32345	3.42344e-17	6.89275e-16	53.809	80.979	46.424	61.439	135.134	1
226977	NM_146107	Actr1b	0.427623	0.000964589	0.016151	-0.0139805	0.914232	0.989044	0.0995712	0.442949	0.999991	1.32974	7.89379e-25	2.67935e-23	29.837	36.825	29.702	30.917	74.834	1
66713	NM_146243	Actr2	0.554861	0.00299925	0.0387087	-0.318759	0.0883219	0.584555	-0.153093	0.413021	0.999991	0.803284	1.73248e-05	8.94655e-05	83.931	113.638	67.273	73.382	146.512	1
74117	NM_023735	Actr3	0.600545	0.000281535	0.00579251	-0.374411	0.0236132	0.293949	-0.173713	0.293634	0.999991	1.12558	9.92549e-12	1.22104e-10	177.349	247.096	137.301	152.824	387.458	1
109652	NM_025371	Acy1	1.36849	6.35576e-23	2.23826e-20	0.321766	0.0238978	0.295854	0.400219	0.00495075	0.719679	1.11612	1.27153e-15	2.26248e-14	4.199	10.071	5.277	5.415	9.119	1
11488	NM_001110778	Adam11	1.29122	1.11153e-05	0.000363541	-0.714373	0.0161131	0.230792	-0.226354	0.444242	0.999991	2.92414	1.97081e-23	6.01061e-22	1.595	3.797	0.936	1.3	13.648	1
11490	NM_001037722	Adam15	0.873051	0.00243357	0.0333175	1.22604	2.01468e-05	0.001257	0.347645	0.228954	0.999991	2.6561	1.93408e-20	4.90343e-19	1.983	3.454	4.924	2.481	13.898	0
58860	NM_021475	Adamdec1	3.04116	8.29198e-10	6.50598e-08	1.14832	0.0223633	0.283826	0.289045	0.571621	0.999991	6.65339	1.49228e-41	1.24583e-39	0.048	0.947	0.19	0.067	18.776	1
101401	NM_175314	Adamts9	-1.7854	0.000115947	0.00273062	-0.247477	0.586065	0.940731	-0.178746	0.694097	0.999991	-1.91264	3.84498e-05	0.000183533	0.364	0.07	0.3	0.304	0.067	1
231821	NM_172723	Adap1	1.15974	3.01764e-09	2.04916e-07	0.454249	0.0212907	0.275824	0.0214428	0.914229	0.999991	2.82148	4.57168e-48	5.14081e-46	2.453	5.131	3.402	2.431	18.088	1
72113	NM_028105	Adck1	0.494765	0.00084332	0.0144135	0.270746	0.0682587	0.521911	0.102084	0.492804	0.999991	0.392689	0.0081279	0.0216456	9.708	12.707	11.835	10.15	12.636	1
13733	NM_010130	Adgre1	3.10511	2.86845e-10	2.39983e-08	-0.355301	0.472449	0.919293	-1.04257	0.0355767	0.999991	5.17331	7.8417e-26	2.84262e-24	0.777	10.663	0.557	0.259	61.806	1
52614	NM_139138	Adgre4	2.60887	9.05699e-08	4.74568e-06	0.22134	0.684336	0.955565	0.49281	0.35954	0.999991	6.53648	3.17203e-44	3.06629e-42	0	0.108	0.004	0.009	2.286	1
14766	NM_001198894	Adgrg1	-0.573959	0.000387612	0.00760313	-0.14856	0.35822	0.891121	0.179846	0.265951	0.999991	-2.52372	1.87614e-54	2.62819e-52	85.782	52.232	77.431	94.561	14.285	1
11540	NM_009630	Adora2a	-1.21207	7.48627e-07	3.22793e-05	-0.49309	0.0427436	0.408777	0.381415	0.115447	0.999991	-1.84343	8.95934e-14	1.3488e-12	6.075	2.306	4.255	7.765	1.562	1
11541	NM_007413	Adora2b	2.37308	7.95152e-14	1.07066e-11	-1.64591	4.12182e-06	0.000322315	0.0256477	0.938081	0.999991	4.25794	1.59866e-41	1.30821e-39	0.594	3.261	0.145	0.591	14.114	1
11542	NM_009631	Adora3	3.32705	6.09408e-28	2.97686e-25	-1.00504	0.00161136	0.0429642	0.347004	0.26227	0.999991	5.1902	9.19647e-66	1.92427e-63	0.917	10.023	0.417	1.158	42.492	1
72141	NM_028121	Adpgk	0.487096	0.00508352	0.058853	-0.105114	0.546321	0.936184	0.0383423	0.825773	0.999991	0.222055	0.201959	0.327099	16.151	20.849	15.095	16.048	18.644	1
110355	NM_001290818	Adrbk1	0.285761	0.00427699	0.0513205	-0.27544	0.00592874	0.114878	0.151424	0.130146	0.999991	0.0604875	0.545473	0.679939	117.276	130.856	97.116	126.699	120.875	1
320129	NM_001285806	Adrbk2	1.57793	1.52849e-06	6.12326e-05	0.567918	0.0839368	0.571386	-0.350634	0.287032	0.999991	3.46071	4.94939e-26	1.81405e-24	2.209	6.648	3.424	1.631	29.219	1
11565	NM_007421	Adssl1	1.20392	1.45945e-11	1.45398e-09	0.508518	0.00446164	0.093413	0.300687	0.0932237	0.999991	-0.0915055	0.610354	0.735625	11.613	24.919	16.666	14.016	10.781	1
140497	NM_134158	AF251705	2.60199	4.61381e-08	2.60697e-06	0.0479935	0.925682	0.990324	0.0455172	0.929751	0.999991	7.08083	4.13357e-52	5.42284e-50	0.041	0.667	0.047	0.041	23.271	1
106877	NM_178928	Afap1l1	-0.8824	0.00677613	0.072306	0.203283	0.528688	0.932015	0.444613	0.167799	0.999991	-1.30842	6.66728e-05	0.000302859	1.59	0.744	1.857	2.166	0.583	1
114896	NM_054070	Afg3l1	0.57234	3.68584e-07	1.73337e-05	0.0494892	0.660974	0.95142	0.0727999	0.518948	0.999991	0.150438	0.1823	0.30095	16.919	23.079	17.564	17.341	18.583	1
71562	NM_027827	Afmid	-0.690192	0.000467984	0.00899325	0.130979	0.499071	0.924445	0.0398847	0.837378	0.999991	0.205159	0.289321	0.431749	3.102	1.729	3.409	3.092	3.55	0
55979	NM_001163379	Agpat1	0.352588	0.00274592	0.0364112	0.127059	0.281076	0.850315	0.143773	0.222734	0.999991	0.480907	4.37433e-05	0.00020683	28.377	32.931	31.326	30.218	39.044	1
28169	NM_053014	Agpat3	0.9269	1.73135e-06	6.84539e-05	0.436278	0.0245053	0.298854	0.248169	0.201034	0.999991	0.828182	1.93452e-05	9.91859e-05	13.534	23.956	18.543	15.73	24.128	1
68262	NM_026644	Agpat4	-0.790124	0.00112951	0.0183324	-0.444135	0.0664153	0.51514	-0.152733	0.527252	0.999991	-0.158091	0.512752	0.651533	7.617	3.926	5.516	6.641	6.713	1
52123	NM_026792	Agpat5	0.481323	0.00219914	0.0307778	0.0892868	0.570621	0.937661	0.145536	0.355298	0.999991	-0.295379	0.0611648	0.122287	11.552	14.821	12.352	12.466	9.281	1
11610	NM_009642	Agtrap	-0.629568	6.86634e-07	2.99645e-05	0.490357	9.6849e-05	0.00461973	0.198756	0.114796	0.999991	-0.777697	9.25798e-10	9.43492e-09	12.282	7.194	17.373	13.693	7.06	0
74340	NM_021414	Ahcyl2	-0.586913	0.000518803	0.0097836	-0.24528	0.146679	0.712256	-0.175231	0.299798	0.999991	-1.24036	2.42309e-13	3.48899e-12	27.713	16.196	23.516	23.493	10.765	1
106672	NM_001002895	AI413582	0.99102	1.24864e-06	5.13807e-05	0.466234	0.0234677	0.292839	0.158017	0.44545	0.999991	2.14438	3.83079e-26	1.40718e-24	8.729	16.249	12.198	9.461	40.001	1
101602	NM_178901	AI467606	-0.366154	0.00530493	0.060766	0.15968	0.222766	0.798185	0.051036	0.697021	0.999991	-0.111953	0.393355	0.541078	32.236	22.778	36.152	32.436	29.405	1
224833	NM_145489	AI661453	-0.752583	0.00241204	0.0331447	0.0309024	0.899332	0.987084	-0.242922	0.322814	0.999991	-0.928063	0.000197891	0.000806692	1.01	0.533	1.039	0.826	0.506	1
104103	NR_027784	Airn	-1.41993	0.000475179	0.00910839	-0.428428	0.279248	0.84857	-0.437857	0.269565	0.999991	-1.70968	3.20871e-05	0.000156138	1.214	0.354	0.829	0.822	0.298	1
11637	NM_016895	Ak2	0.456631	4.26171e-05	0.00114221	0.211242	0.0585021	0.48278	0.0760216	0.496286	0.999991	0.17175	0.124081	0.221281	60.837	76.492	70.587	62.304	67.76	1
68870	NM_001033874	Ak8	2.91405	1.86907e-15	2.91786e-13	0.430378	0.268738	0.840019	0.163689	0.679036	0.999991	4.97477	7.20444e-43	6.47225e-41	0.178	1.726	0.264	0.197	8.649	1
238276	NM_001101471	Akap5	0.916309	0.0051027	0.0589869	0.0729008	0.827373	0.979392	0.117647	0.725119	0.999991	1.22584	0.000166331	0.000689951	0.143	0.265	0.151	0.15	0.36	1
68050	NM_023423	Akirin1	0.352785	0.00931641	0.0913129	-0.0140538	0.917632	0.989513	0.100007	0.461688	0.999991	0.44485	0.00103956	0.00355553	24.302	28.441	24.184	25.378	32.793	1
11677	NM_009658	Akr1b3	0.272219	0.0101669	0.0977506	-0.0827637	0.435106	0.910095	-0.064719	0.541734	0.999991	0.029552	0.780422	0.861461	97.398	107.692	92.113	90.588	98.222	0
11655	NM_020559	Alas1	0.281466	0.00290351	0.0378707	-0.00112671	0.99056	0.996051	0.0720201	0.449435	0.999991	0.814894	3.02927e-18	6.52854e-17	7.656	8.522	7.666	7.81	13.354	1
11658	NM_009655	Alcam	2.03078	6.02016e-13	7.12213e-11	0.12364	0.665946	0.952983	-0.0583712	0.839115	0.999991	3.71093	7.87234e-40	5.83542e-38	0.648	2.657	0.715	0.6	9.768	1
69748	NM_145954	Aldh16a1	0.325127	0.00306254	0.0393476	0.159526	0.146789	0.712376	-0.117608	0.286464	0.999991	0.454403	3.44002e-05	0.000166025	17.054	19.577	19.078	15.293	23.17	0
72535	NM_028270	Aldh1b1	0.611752	0.00344077	0.0433424	0.988883	2.21376e-06	0.000199597	0.952217	5.20552e-06	0.00465977	-0.503379	0.0165664	0.0401117	11.911	16.829	24.127	22.845	8.206	0
212647	NM_175438	Aldh4a1	0.385165	0.00105575	0.0173774	0.0892714	0.449536	0.91391	0.164353	0.163848	0.999991	0.381996	0.00116581	0.00393443	7.416	8.876	7.925	8.079	9.567	1
11687	NM_009660	Alox15	3.35117	4.00113e-21	1.18802e-18	-0.724112	0.0763554	0.547348	0.112145	0.772467	0.999991	3.77419	1.68791e-26	6.29079e-25	0.125	1.605	0.06	0.134	2.366	1
11690	NM_009663	Alox5ap	2.08446	2.50245e-17	5.05261e-15	-1.58034	2.39728e-10	5.66557e-08	-0.997658	5.92917e-05	0.0341953	3.6693	2.53797e-50	3.1308e-48	21.301	87.96	6.726	10.035	298.061	1
108812	NM_175370	Als2cr12	2.12584	1.21666e-05	0.000389511	-0.320924	0.552465	0.93664	0.0291197	0.95632	0.999991	4.30593	6.44909e-20	1.5654e-18	0.025	0.258	0.01	0.025	1.535	1
270152	NM_001005421	Amica1	1.83954	4.94564e-06	0.000174167	-0.669354	0.1017	0.617138	0.319149	0.431233	0.999991	3.53857	1.30096e-18	2.87883e-17	0.857	3.393	0.494	1.078	13.74	1
11717	NM_009667	Ampd3	2.44538	9.36719e-21	2.6268e-18	0.226361	0.40818	0.905679	-0.314697	0.263097	0.999991	4.91491	2.45409e-80	8.27879e-78	0.317	1.747	0.376	0.238	11.188	1
231842	NM_173405	Amz1	2.9058	6.3375e-21	1.84555e-18	-0.617125	0.0615943	0.496254	-0.705109	0.0339839	0.999991	5.47525	9.67044e-71	2.45927e-68	0.415	3.373	0.253	0.226	24.012	1
11733	NM_001277284	Ank1	1.54576	0.000757281	0.0133498	0.343996	0.456843	0.916685	0.153435	0.740609	0.999991	3.16793	4.23221e-12	5.42735e-11	0.106	0.366	0.145	0.119	1.479	1
106585	NM_001025572	Ankrd12	-0.574035	5.30493e-05	0.00138984	-0.237405	0.0938264	0.595889	0.0695731	0.622927	0.999991	-0.959199	1.71692e-11	2.07461e-10	5.373	3.282	4.562	5.446	2.702	1
72615	NM_028301	Anks3	1.19892	1.28387e-18	3.03777e-16	0.0628414	0.646915	0.950527	0.128055	0.350646	0.999991	0.39205	0.00416549	0.0120927	10.903	23.163	11.405	11.495	14.184	0
16790	NM_008486	Anpep	3.67397	1.5746e-49	1.70316e-46	0.285133	0.272398	0.841354	-0.270068	0.310466	0.999991	5.86002	4.39887e-124	3.16145e-121	0.453	6.042	0.565	0.351	31.419	1
71914	NM_133738	Antxr2	0.862164	0.00139639	0.0214457	-1.50361	4.11913e-08	5.84092e-06	-0.967165	0.000389218	0.15045	1.37073	3.65937e-07	2.62427e-06	3.339	5.726	1.108	1.603	8.973	1
11746	NM_013471	Anxa4	0.900451	0.0018589	0.0268858	0.280539	0.333933	0.880103	-0.295109	0.312077	0.999991	3.0257	7.92131e-26	2.86519e-24	2.995	5.324	3.713	2.293	27.425	1
11749	NM_013472	Anxa6	0.553398	0.00709987	0.07487	-0.329993	0.108506	0.631956	-0.0709414	0.730057	0.999991	1.0277	5.73855e-07	3.96233e-06	154.297	209.115	122.436	142.288	317.36	1
108012	NM_001290379	Ap1s2	0.44678	0.00673748	0.0721029	-0.308521	0.0673134	0.517941	-0.0850117	0.612247	0.999991	2.0957	1.11675e-38	7.69163e-37	2.645	3.32	2.139	2.427	11.52	1
252903	NM_183027	Ap1s3	1.10666	1.57525e-05	0.000486816	-0.338531	0.189046	0.771921	-0.345052	0.180884	0.999991	1.86729	2.97965e-13	4.2387e-12	4.792	9.774	3.762	3.645	18.343	1
54519	NM_019456	Apbb1ip	0.762233	5.7613e-07	2.56598e-05	-0.361235	0.0181493	0.250303	-0.227984	0.135861	0.999991	0.951594	4.30534e-10	4.56493e-09	31.424	49.107	24.472	26.032	60.64	1
226548	NM_146104	Aph1a	0.328943	0.00769917	0.0798874	0.0551407	0.655417	0.95142	0.108268	0.38096	0.999991	0.572082	3.51562e-06	2.12014e-05	23.917	27.526	24.949	25.123	35.298	1
68318	NM_026674	Aph1c	0.791911	0.00380689	0.0469444	-0.334568	0.236556	0.814235	-0.103541	0.712478	0.999991	3.02517	1.13404e-29	4.94608e-28	0.317	0.522	0.247	0.281	2.87	1
103161	NM_133997	Apof	3.94021	1.78566e-30	9.32424e-28	0.0393572	0.925563	0.990324	-0.0892474	0.835542	0.999991	5.91107	1.45682e-68	3.39172e-66	0.048	1.196	0.051	0.04	5.255	1
278679	NM_001024848	Apol7b	-1.26379	8.13705e-06	0.000273821	0.585984	0.037449	0.381356	0.0802192	0.775995	0.999991	-0.067777	0.810059	0.882333	10.446	3.768	16.062	10.557	9.822	0
666348	NM_001134802	Apol7e	-1.28396	4.76565e-06	0.00016822	0.545739	0.0495152	0.439798	0.0766658	0.782992	0.999991	-0.0764915	0.783566	0.863778	6.318	2.243	9.44	6.374	5.901	0
381823	NM_001109914	Apold1	-0.766096	0.00539687	0.0613658	0.281055	0.28002	0.849326	0.114836	0.662143	0.999991	-0.632821	0.0206019	0.0484078	0.413	0.211	0.508	0.434	0.253	0
11821	NM_009698	Aprt	0.570771	0.00818079	0.0831961	0.286426	0.184706	0.765812	0.0618477	0.774708	0.999991	0.0263736	0.902854	0.940284	49.573	68.17	60.793	50.518	50.039	1
64008	NR_073483	Aqp9	1.31385	0.000441477	0.00854895	-2.35925	6.28748e-10	1.3813e-07	-0.847413	0.0243472	0.999991	2.15451	8.0774e-09	7.34834e-08	3.016	7.611	0.458	1.51	15.598	1
212285	NM_178407	Arap2	-0.810999	0.000239329	0.00505461	0.110683	0.6127	0.946684	0.035247	0.872081	0.999991	0.825884	0.000148744	0.000624202	1.655	0.843	1.791	1.638	2.947	1
232201	NM_001037727	Arhgap25	0.396164	0.00399711	0.0487675	-0.4602	0.00093961	0.0285693	-0.292255	0.0353792	0.999991	1.0847	2.37391e-15	4.13931e-14	6.096	7.36	4.407	4.926	13.115	1
544817	NM_133715	Arhgap27	0.446668	0.00702365	0.074338	-0.267719	0.107033	0.62933	-0.0508603	0.759325	0.999991	1.49794	1.32278e-19	3.1371e-18	14.105	17.689	11.746	13.191	40.099	1
268970	NM_172964	Arhgap28	1.38003	0.000121129	0.00283065	-0.0714119	0.851255	0.980271	-0.11182	0.770491	0.999991	3.5702	1.08978e-24	3.65396e-23	0.068	0.191	0.065	0.059	1.069	1
223666	NM_001168288	Arhgap39	0.705909	9.77364e-06	0.000322445	-0.158826	0.324009	0.874982	0.134666	0.401733	0.999991	1.91865	1.15535e-33	6.1016e-32	3.578	5.406	3.221	3.818	13.722	1
11856	NM_178754	Arhgap6	1.60546	7.51489e-06	0.000254582	0.233967	0.516523	0.929196	-0.0194381	0.957124	0.999991	3.13045	2.04907e-18	4.46848e-17	0.792	2.494	0.955	0.749	8.565	1
11857	NM_007486	Arhgdib	0.321317	0.010354	0.0989837	-0.224004	0.0740195	0.541099	-0.138065	0.270845	0.999991	0.466071	0.000199966	0.000814148	324.887	371.716	278.022	286.738	444.564	1
268739	NM_198249	Arhgef40	1.00993	3.0678e-10	2.52477e-08	-0.235102	0.145774	0.710265	-0.100215	0.535002	0.999991	1.79688	3.04497e-29	1.30397e-27	4.601	8.59	3.916	4.162	16.203	1
217151	NM_207231	Arl5c	-1.33179	0.000256193	0.00535107	1.16023	0.00138937	0.038699	0.623106	0.086135	0.999991	-2.50087	8.71711e-12	1.08016e-10	14.451	4.729	34.997	22.6	2.035	1
65106	NM_022992	Arl6ip5	0.495298	3.4764e-05	0.000964161	0.0137282	0.908917	0.988534	-0.00359106	0.976142	0.999991	1.97832	5.52329e-62	9.92391e-60	37.776	48.825	38.166	36.654	148.897	1
68724	NM_026823	Arl8a	0.625152	0.000653362	0.0118421	0.0768053	0.676168	0.954969	-0.209737	0.255091	0.999991	1.10997	1.35435e-09	1.3519e-08	14.853	21.159	15.728	12.44	32.303	1
100503043	NM_001202500	Armcx4	-0.905791	0.00553742	0.0623907	-0.476627	0.144084	0.70785	-0.0257874	0.936976	0.999991	-1.84527	1.74303e-08	1.52124e-07	4.004	1.85	2.823	3.833	0.987	0
56443	NM_019767	Arpc1a	0.304149	0.00687494	0.0732118	0.0745542	0.508165	0.92739	0.0548284	0.626718	0.999991	0.256641	0.0226209	0.0524068	42.497	48.061	44.788	42.946	50.252	1
11867	NM_023142	Arpc1b	0.677832	3.6815e-05	0.00101464	-0.528354	0.00130603	0.0370478	-0.251826	0.125425	0.999991	1.25338	2.31834e-14	3.69193e-13	238.387	351.524	164.587	193.75	570.148	1
76709	NM_029711	Arpc2	0.653423	1.83671e-08	1.1081e-06	-0.162667	0.161733	0.740885	-0.194525	0.0943282	0.999991	0.966771	8.28535e-17	1.63044e-15	162.225	234.101	144.977	137.797	314.68	1
56378	NM_019824	Arpc3	0.340366	0.00817751	0.0831961	0.0555794	0.666063	0.952983	0.0886483	0.491292	0.999991	0.823296	1.52891e-10	1.69163e-09	136.751	158.602	142.115	141.47	240.402	1
68089	NM_026552	Arpc4	0.599351	2.17469e-06	8.26137e-05	0.0633566	0.616881	0.947856	-0.00178308	0.98877	0.999991	1.14259	1.64815e-19	3.89199e-18	75.252	104.675	78.65	72.973	165.384	1
67771	NM_026369	Arpc5	0.527115	2.50111e-05	0.000728353	-0.0365258	0.770431	0.975133	-0.144755	0.247647	0.999991	1.30829	1.20898e-25	4.35389e-24	102.555	135.489	100.184	90.035	252.804	1
545260	NM_001038499	Arsi	-1.71129	7.70164e-07	3.30385e-05	0.894517	0.00810232	0.142802	0.00201845	0.995256	0.999991	-3.55422	7.38509e-22	2.06209e-20	3.168	0.779	6.244	3.133	0.173	1
109978	NM_026639	Art4	-1.11053	7.542e-08	4.06436e-06	-0.520261	0.0113748	0.18329	0.0723465	0.72414	0.999991	-3.761	5.61719e-65	1.1187e-62	11.166	4.612	7.7	11.362	0.72	1
11886	NM_019734	Asah1	1.02763	1.79007e-05	0.000544319	-0.0237573	0.921231	0.990275	-0.239708	0.319004	0.999991	2.36009	5.76565e-23	1.71723e-21	9.372	17.979	9.274	7.596	50.796	1
65256	NM_023049	Asb2	5.29189	5.75387e-83	2.90436e-79	-0.0618073	0.833879	0.979392	0.872273	0.00225654	0.516887	8.18911	1.34749e-196	1.1137e-192	0.345	15.829	0.329	0.658	138.413	1
67855	NM_026414	Asprv1	1.88464	0.000902443	0.0152519	0.776295	0.17249	0.75138	0.0170555	0.976161	0.999991	1.6624	0.00342442	0.01019	0.267	1.77	0.647	0.271	1.56	1
74772	NM_029097	Atp13a2	1.344	4.70188e-17	8.90008e-15	0.229639	0.152247	0.722688	-0.0636053	0.69199	0.999991	1.6062	1.08296e-23	3.3904e-22	17.177	40.466	20.204	16.098	52.696	1
11944	NM_001290627	Atp4a	3.39979	3.4977e-13	4.20362e-11	-0.0182957	0.972144	0.995097	0.119605	0.818704	0.999991	2.16659	5.85909e-06	3.3524e-05	0.013	0.337	0.013	0.015	0.138	0
11950	NM_009725	Atp5f1	0.329551	0.00209951	0.0296576	-0.10767	0.315301	0.872762	0.0370107	0.729929	0.999991	-0.2689	0.0121816	0.0307094	153.89	176.953	142.887	153.716	125.759	1
54411	NM_018794	Atp6ap1	0.533051	8.96225e-05	0.00219249	0.0321079	0.813847	0.979392	-0.00923648	0.946026	0.999991	1.37746	3.53778e-24	1.15117e-22	26.258	34.898	26.984	25.329	68.263	1
11975	NM_001243051	Atp6v0a1	1.47046	0.00203579	0.0289465	0.373191	0.434217	0.910095	-0.0542384	0.909597	0.999991	1.53938	0.00123941	0.00415735	1.079	3.549	1.562	1.049	4.063	1
114143	NM_033617	Atp6v0b	0.972076	9.65689e-10	7.49919e-08	0.381332	0.0166817	0.23679	0.0315785	0.843209	0.999991	1.6594	1.38856e-25	4.96815e-24	35.033	63.567	45.801	34.516	111.295	1
11972	NM_013477	Atp6v0d1	0.44466	0.00166312	0.0247907	0.147086	0.298919	0.86136	0.0683863	0.629403	0.999991	0.996532	1.66152e-12	2.20956e-11	28.478	35.572	31.621	28.963	56.642	1
11974	NM_025272	Atp6v0e	0.490888	0.00012105	0.00283065	0.182617	0.153475	0.725982	0.0651601	0.61102	0.999991	0.907919	1.0579e-12	1.43404e-11	53.523	69.014	60.782	54.077	99.815	1
380753	NM_001033436	Atxn7l1	-0.635913	0.000785962	0.0137171	-0.599963	0.00153306	0.0414385	0.00240824	0.989834	0.999991	-0.972145	2.99534e-07	2.186e-06	19.196	11.17	12.64	18.577	9.498	1
69534	NM_027106	Avpi1	0.783332	0.00365091	0.0454652	-0.593228	0.0289828	0.327827	0.270043	0.317531	0.999991	1.78389	3.21368e-11	3.79987e-10	10.137	16.407	6.599	12.041	36.73	1
53625	NM_016888	B3gnt2	-0.786336	0.000190385	0.00416618	0.0766162	0.715649	0.962106	0.256949	0.221746	0.999991	-1.88758	5.02153e-19	1.14967e-17	23.486	12.222	24.917	27.559	5.999	1
227327	NM_145222	B3gnt7	0.922377	0.00871248	0.0868553	0.596231	0.0914542	0.59044	0.732933	0.0378182	0.999991	1.60845	4.11454e-06	2.44389e-05	0.446	0.835	0.716	0.772	1.523	1
57370	NM_020579	B4galt3	0.432864	0.000416693	0.00811051	0.207997	0.0910404	0.589232	0.101963	0.408903	0.999991	1.11596	4.79327e-20	1.17285e-18	9.004	11.157	10.427	9.369	19.449	1
56386	NM_019737	B4galt6	1.74307	7.51342e-09	4.9272e-07	0.0720388	0.817212	0.979392	-0.145216	0.644558	0.999991	4.62411	1.71825e-54	2.44851e-52	0.199	0.678	0.212	0.17	6.073	1
232987	NM_172148	B9d2	0.448146	0.00546438	0.0618317	0.0248463	0.877959	0.983731	0.00965563	0.952451	0.999991	0.536248	0.000881777	0.0030796	22.211	27.872	22.572	21.71	32.022	1
12014	NM_001109661	Bach2	-1.09852	9.12545e-05	0.00222165	-0.569135	0.0420976	0.405583	-0.36706	0.189668	0.999991	-1.27039	6.20873e-06	3.52318e-05	2.373	0.967	1.56	1.744	0.915	1
414068	NR_026843	Bach2os	-1.02576	0.00137911	0.0213101	-0.533156	0.0870388	0.579688	-0.237725	0.440493	0.999991	-1.24998	0.000127928	0.000544173	0.712	0.293	0.473	0.574	0.262	1
81913	NR_027919	Bambi-ps1	-1.44215	0.00339491	0.0428767	1.55764	0.000878446	0.0271865	0.395603	0.403354	0.999991	-1.86242	0.000198136	0.00080749	0.527	0.114	1.947	0.726	0.069	1
381319	NM_030060	Batf3	1.95531	6.94825e-06	0.000236976	1.45285	0.000872089	0.0271082	0.0800731	0.857093	0.999991	5.05253	1.25805e-31	5.87445e-30	0.719	3.512	2.548	0.737	43.476	1
100473	NR_028391	BB031773	-1.12549	3.16851e-05	0.00088918	-0.495645	0.0591304	0.483792	-0.183628	0.48061	0.999991	-4.22861	1.56303e-28	6.52445e-27	0.66	0.262	0.458	0.556	0.01	1
72873	NM_028377	Bbof1	-0.600333	0.00958651	0.0932361	-0.272071	0.234305	0.81103	0.204743	0.364583	0.999991	-1.96068	1.08508e-14	1.7865e-13	1.391	0.822	1.142	1.56	0.318	0
225884	NM_144869	BC021614	-1.26524	0.00494553	0.0576966	-0.444488	0.315792	0.872763	-0.658419	0.139131	0.999991	-0.949996	0.0336732	0.0739527	1.96	0.602	1.354	1.113	0.866	1
232406	NM_001254946	BC035044	0.5314	0.00211482	0.0298459	-0.519359	0.00277729	0.0656366	-0.30838	0.0754858	0.999991	0.680492	8.24297e-05	0.000367169	16.373	21.789	11.368	12.743	26.105	1
408059	NM_001198971	BC049352	-0.885066	0.0077055	0.0798874	0.576987	0.0557492	0.472339	0.382886	0.21	0.999991	-0.291021	0.359109	0.505844	0.401	0.178	0.623	0.522	0.314	1
407788	NM_001001177	BC051142	1.68968	0.00252481	0.0341367	0.106227	0.855693	0.981299	0.627533	0.27607	0.999991	2.60173	2.33138e-06	1.45713e-05	0.005	0.116	0.01	0.035	0.265	0
12033	NM_007530	Bcap29	0.445502	0.00794207	0.0817932	-0.149701	0.373928	0.897557	0.0704969	0.675146	0.999991	0.0161537	0.923499	0.953879	16.922	21.025	15.305	17.323	16.818	1
76960	NM_029815	Bcas1	1.63952	0.00124317	0.0198999	-0.0641798	0.902978	0.987533	0.181625	0.72875	0.999991	0.902483	0.0791931	0.152075	0.047	0.21	0.044	0.057	0.119	1
12036	NM_009737	Bcat2	0.491803	0.000127588	0.00295423	0.106826	0.406309	0.905373	-0.106066	0.410575	0.999991	0.426193	0.000905157	0.00315194	27.351	35.43	29.467	24.904	36.441	1
12043	NM_009741	Bcl2	-0.808526	0.00355443	0.0444099	-0.546088	0.0489334	0.438594	-0.375684	0.175498	0.999991	-2.94319	3.34257e-26	1.23057e-24	34.983	18.648	23.885	25.948	4.667	1
12044	NM_009742	Bcl2a1a	2.02585	0.00072698	0.0129666	-0.0110102	0.985364	0.995097	-0.18765	0.754613	0.999991	4.49845	6.09896e-14	9.31754e-13	0.467	6.366	0.451	0.261	69.975	1
12045	NM_007534	Bcl2a1b	2.19631	0.000203684	0.00440627	-0.0814594	0.890576	0.985764	-0.324751	0.583528	0.999991	4.70587	1.70674e-15	3.01415e-14	0.77	10.203	0.66	0.353	109.197	1
12046	NM_007535	Bcl2a1c	2.1266	0.00019263	0.00420316	0.29556	0.614633	0.947056	0.142908	0.808531	0.999991	4.72421	4.6504e-17	9.27274e-16	0	0.755	0.052	0.017	7.737	1
12047	NM_007536	Bcl2a1d	2.1726	0.000270591	0.00560205	-0.0340068	0.954592	0.995097	-0.243142	0.684008	0.999991	4.67019	4.85171e-15	8.18355e-14	0.613	9.099	0.566	0.31	99.198	1
66813	NM_025778	Bcl2l14	1.08132	3.18174e-08	1.83897e-06	-1.76174	1.02599e-18	1.91132e-15	-0.363968	0.0642691	0.999991	-0.416098	0.0344097	0.0753667	11.973	23.618	3.404	9.003	8.787	1
12051	NM_033601	Bcl3	0.697873	9.63894e-05	0.00233167	-0.197795	0.278821	0.848162	-0.278077	0.129678	0.999991	3.04088	2.77137e-67	6.19065e-65	3.112	4.673	2.705	2.47	26.551	1
12053	NM_009744	Bcl6	-0.77302	2.96681e-06	0.000109577	1.14705	2.76784e-13	1.43909e-10	0.358321	0.0247021	0.999991	1.43845	3.86042e-20	9.56712e-19	2.061	1.087	4.659	2.58	5.629	1
170752	NM_133217	Bco2	1.34448	9.05529e-05	0.00221168	-0.824372	0.0252816	0.304511	-0.433831	0.2314	0.999991	2.90782	8.15759e-18	1.7069e-16	0.362	0.942	0.181	0.242	3.278	1
328660	NM_001033539	Bex6	2.64596	3.95016e-21	1.18802e-18	-1.00582	0.000840202	0.0263162	-0.560522	0.0585415	0.999991	4.56427	3.96528e-60	6.62082e-58	1.796	11.581	0.824	1.136	50.461	1
17341	NM_010800	Bhlha15	-1.0172	0.000438746	0.00850695	-0.274698	0.325796	0.875494	-0.183048	0.512282	0.999991	-2.48834	2.79561e-14	4.4137e-13	0.523	0.223	0.427	0.443	0.07	1
12122	NM_007544	Bid	0.57207	0.00614428	0.0676675	0.145065	0.487706	0.922134	0.000162951	0.999379	0.999991	-0.038901	0.852477	0.908598	16.279	22.406	18.109	15.99	15.668	1
668218	NM_001270537	Bin2	0.379972	0.00657778	0.0708904	-0.604577	1.63356e-05	0.00104787	-0.0885083	0.527359	0.999991	1.1066	2.29332e-15	4.00301e-14	45.094	53.812	29.605	41.119	96.816	1
17060	NM_008528	Blnk	2.32714	1.37188e-06	5.53983e-05	0.434323	0.387081	0.900177	0.61153	0.221649	0.999991	4.81317	3.75523e-24	1.21953e-22	0.041	0.404	0.073	0.085	3.148	1
73689	NM_028607	Bloc1s2	1.48521	2.90015e-24	1.15571e-21	0.115536	0.432918	0.910095	0.192304	0.191782	0.999991	1.06961	2.76006e-13	3.95697e-12	26.948	70.058	29.218	29.803	56.468	1
117197	NM_133724	Bloc1s4	0.407234	0.00859807	0.0862827	0.168317	0.278949	0.848162	0.0244603	0.875379	0.999991	0.658737	2.03499e-05	0.000103746	10.303	12.551	11.621	10.196	16.202	1
171543	NM_138313	Bmf	-0.838191	1.51308e-05	0.000472423	0.492744	0.0106744	0.176377	0.190704	0.323443	0.999991	-0.00622254	0.974307	0.990623	11.746	5.903	16.746	13.021	11.532	1
78653	NM_175277	Bola3	0.389078	0.00187699	0.0270671	0.234759	0.061252	0.49503	0.172429	0.170133	0.999991	-0.0289178	0.818536	0.88788	35.187	42.249	41.474	38.469	34.01	0
12181	NM_013481	Bop1	0.380934	0.00290246	0.0378707	0.0533098	0.677168	0.954969	0.122434	0.338992	0.999991	-0.373087	0.0036314	0.0107402	37.503	44.785	39.043	39.692	28.545	1
66439	NM_025563	Borcs7	0.433226	0.00204149	0.0290003	0.178311	0.209036	0.785472	0.092398	0.518091	0.999991	0.608747	1.31889e-05	6.99431e-05	2.361	2.932	2.681	2.441	3.588	1
270757	NM_177772	Bpifc	1.57265	0.000123016	0.0028615	-1.45315	0.000675717	0.0222359	-0.522995	0.211589	0.999991	-0.367698	0.378116	0.52624	0.587	1.864	0.168	0.365	0.428	1
210766	NM_145956	Brcc3	0.291896	0.00856724	0.0860303	0.0346311	0.755924	0.971402	-0.0894533	0.423417	0.999991	-0.11098	0.320449	0.464648	17.252	19.562	17.831	15.732	15.117	1
114642	NM_054054	Brdt	-1.15086	1.45473e-12	1.63178e-10	0.976221	1.31686e-10	3.35167e-08	0.235384	0.127393	0.999991	-2.47436	3.06461e-42	2.65225e-40	1.608	0.649	3.198	1.837	0.266	0
76809	NM_029752	Bri3bp	1.11014	3.48353e-19	8.64773e-17	-0.621444	6.30156e-07	6.46656e-05	-0.104575	0.400798	0.999991	1.25012	6.57131e-24	2.08892e-22	12.695	25.24	8.241	11.492	30.048	1
68815	NM_133700	Btbd10	0.394328	0.000935385	0.0157559	-0.0558548	0.642185	0.950332	0.123546	0.302934	0.999991	-0.0667241	0.579169	0.710054	6.599	7.95	6.367	6.956	6.218	1
12229	NM_013482	Btk	1.14984	2.48936e-05	0.000726328	-0.489355	0.0742317	0.54112	0.119772	0.661435	0.999991	1.59449	4.92877e-09	4.61601e-08	6.29	13.317	4.393	6.656	19.888	1
319772	NM_177000	C130050O18Rik	0.856036	0.00510395	0.0589869	-0.148848	0.644889	0.950527	0.138643	0.663171	0.999991	4.0608	5.71662e-45	5.72702e-43	0.269	0.482	0.239	0.291	5.447	1
12261	NM_007573	C1qbp	0.382439	0.00503882	0.0584696	0.0145454	0.915112	0.989058	0.103758	0.447018	0.999991	-0.685546	5.33085e-07	3.69937e-06	114.396	136.753	115.853	120.168	69.892	0
12263	NM_013484	C2	1.15433	0.00663407	0.0713493	0.33103	0.445268	0.912413	0.0203343	0.96307	0.999991	2.56316	8.66932e-10	8.87881e-09	0.126	0.312	0.171	0.123	1.025	1
12266	NM_009778	C3	1.3245	0.00428301	0.051352	0.78653	0.0903843	0.587815	-0.0347845	0.940579	0.999991	1.91417	3.57467e-05	0.000171821	0.29	0.825	0.576	0.269	1.466	1
97130	NM_001033189	C77080	0.810373	0.00513972	0.059277	-0.198178	0.495788	0.923599	-0.284043	0.329452	0.999991	0.684695	0.0181287	0.0433797	1.813	2.952	1.573	1.435	2.928	1
63955	NM_001146287	Cables1	-0.769517	0.000608665	0.0111182	-0.00419723	0.984998	0.995097	0.0258801	0.907722	0.999991	-2.11923	2.4734e-20	6.19475e-19	5.12	2.683	5.144	5.067	1.095	1
12286	NM_001252059	Cacna1a	0.906391	0.000603712	0.0110423	0.400687	0.133514	0.688053	-0.0238378	0.929866	0.999991	1.26647	1.45106e-06	9.40996e-06	0.243	0.434	0.328	0.231	0.611	1
12289	NM_028981	Cacna1d	0.73687	0.00113297	0.0183689	-0.108737	0.633411	0.947856	0.177612	0.434948	0.999991	-0.820542	0.000369119	0.0014183	1.019	1.583	0.939	1.127	0.556	1
12296	NM_023116	Cacnb2	0.580023	0.010204	0.0979826	-0.930364	5.76993e-05	0.00301555	-0.361841	0.113869	0.999991	0.760037	0.000749862	0.00266851	1.686	2.342	0.861	1.254	2.884	1
12301	NM_009786	Cacybp	0.456238	0.00106385	0.0174917	0.07678	0.582121	0.940247	0.0794433	0.56918	0.999991	-0.406293	0.00365151	0.0107881	41.364	52.082	43.739	42.653	30.702	1
67488	NM_026192	Calcoco1	-0.68421	8.22549e-05	0.00205204	-0.0787633	0.649405	0.95087	0.185347	0.284405	0.999991	-0.318797	0.066074	0.130584	16.614	9.35	15.769	18.35	13.11	1
54598	NM_018782	Calcrl	-0.633622	0.00786834	0.081165	-0.418543	0.078728	0.557421	-0.352789	0.138381	0.999991	-0.49126	0.0391861	0.084101	3.69	2.13	2.743	2.771	2.555	1
72691	NM_133746	Calhm2	1.15427	7.14003e-07	3.10694e-05	-0.596181	0.011945	0.19012	-0.57074	0.0161951	0.999991	3.05145	1.1056e-39	8.05088e-38	3.376	7.092	2.202	2.159	29.971	1
12313	NM_009790	Calm1	0.360893	0.00827943	0.0838393	0.314225	0.0215087	0.277726	-0.0115435	0.932718	0.999991	0.66818	1.01032e-06	6.7233e-06	72.087	84.828	90.145	69.767	113.812	1
12322	NM_009792	Camk2a	-0.707255	1.2346e-07	6.31609e-06	-0.430446	0.00127632	0.0364616	-0.233754	0.0801398	0.999991	-2.23836	9.47274e-62	1.6837e-59	33.604	18.73	24.987	27.605	6.904	1
216874	NM_178116	Camta2	0.645092	3.27594e-07	1.56986e-05	0.17024	0.180401	0.7627	0.230783	0.0694323	0.999991	2.18508	2.144e-68	4.85484e-66	4.226	6.079	4.782	4.806	19.274	1
12335	NM_007601	Capn3	-0.85886	0.000380258	0.00749527	-0.010311	0.965411	0.995097	0.217741	0.358774	0.999991	-0.842039	0.000495926	0.00184882	2.159	1.064	2.146	2.455	1.016	1
12337	NM_007602	Capn5	-0.84626	4.83331e-07	2.1783e-05	0.06749	0.687622	0.955565	0.267902	0.110411	0.999991	-2.50381	2.36911e-49	2.7774e-47	27.845	14.035	29.524	32.752	4.701	1
12345	NM_001037761	Capzb	0.661453	1.39937e-08	8.82946e-07	0.0204854	0.860634	0.9816	-0.00577238	0.96055	0.999991	0.927486	1.7621e-15	3.10529e-14	148.102	214.968	150.265	143.062	279.663	1
12319	NM_007592	Car8	1.342	7.82508e-05	0.0019651	0.134104	0.698659	0.957964	0.282331	0.414252	0.999991	0.660824	0.0540401	0.110295	0.206	0.528	0.232	0.248	0.34	1
239319	NM_001163138	Card6	-0.927133	0.00134482	0.0209728	-0.288584	0.315986	0.872763	-0.0719456	0.802438	0.999991	0.0752445	0.793381	0.870881	2.357	1.084	1.915	2.145	2.461	1
69225	NM_026995	Carkd	-0.537234	0.000783323	0.0136973	0.326583	0.0407387	0.399901	0.255065	0.110123	0.999991	-1.5987	2.77863e-23	8.39686e-22	65.269	41.008	82.193	75.307	20.823	1
107239	NM_134148	Carns1	-0.778785	0.00786113	0.0811459	0.36582	0.210781	0.786628	0.2125	0.467411	0.999991	-0.481305	0.100205	0.185444	7.361	3.792	9.644	8.204	5.086	1
12369	NM_007611	Casp7	0.556796	2.2061e-06	8.35174e-05	0.0373905	0.752161	0.971358	0.102162	0.38828	0.999991	1.03078	1.38171e-18	3.04936e-17	10.44	14.097	10.762	10.854	21.207	1
12371	NM_015733	Casp9	0.634498	0.0031274	0.0401001	0.105156	0.625365	0.947856	-0.11237	0.602622	0.999991	1.53932	6.43212e-13	8.8455e-12	3.64	5.26	3.971	3.266	10.85	1
320664	NM_001080820	Cass4	0.717938	0.0023212	0.0321297	-0.826908	0.00117927	0.0343176	-0.105979	0.664827	0.999991	3.98368	1.29516e-69	3.10275e-67	0.421	0.652	0.231	0.385	7.395	1
208650	NM_001033238	Cblb	-0.588018	0.00300099	0.0387087	-0.328803	0.0968961	0.606252	0.132664	0.502771	0.999991	-0.974774	8.85528e-07	5.94548e-06	17.507	10.523	13.954	18.619	8.636	1
229905	NM_001293560	Ccbl2	0.50605	0.00264216	0.0354701	-0.0909167	0.59315	0.94145	0.133754	0.430375	0.999991	0.270961	0.10894	0.198762	3.706	4.845	3.479	3.978	4.433	1
104479	NM_134033	Ccdc117	-0.414883	0.00658335	0.0708904	0.0312349	0.837607	0.979392	0.101456	0.505588	0.999991	-0.811196	1.15799e-07	8.98663e-07	17.612	12.016	18.121	18.402	9.828	0
270150	NM_001081369	Ccdc153	-1.32806	3.4188e-07	1.63315e-05	0.00679018	0.97862	0.995097	-0.0769125	0.761965	0.999991	-5.01695	1.7423e-44	1.73496e-42	5.192	1.797	5.209	4.78	0.057	1
73254	NM_028481	Ccdc18	-0.707557	0.00628342	0.0687499	-0.0440598	0.864755	0.982058	0.0493041	0.848837	0.999991	-3.13446	5.32522e-33	2.71685e-31	13.379	7.319	12.999	13.5	1.337	0
381522	NM_198660	Ccdc180	1.74787	1.18721e-05	0.000381697	0.432756	0.300498	0.863518	0.102819	0.809683	0.999991	2.26971	9.1489e-09	8.24598e-08	0.041	0.168	0.062	0.044	0.272	1
207607	NM_175430	Ccdc40	0.847343	0.000743942	0.0132001	0.244983	0.334062	0.880103	0.278161	0.273088	0.999991	-0.550622	0.0334047	0.0734761	0.624	1.06	0.75	0.751	0.412	1
52570	NM_177471	Ccdc69	0.356172	0.00949972	0.0926896	-0.0251052	0.856104	0.981299	0.27921	0.0426445	0.999991	0.242233	0.0785746	0.151168	8.155	9.582	8.011	9.591	9.533	1
108673	NM_023731	Ccdc86	0.449478	0.00031572	0.00639275	0.000666732	0.995752	0.998172	0.127594	0.307979	0.999991	0.162197	0.194691	0.317549	12.464	15.612	12.491	13.263	13.806	1
20290	NM_011329	Ccl1	1.57884	0.00541976	0.0615228	0.55507	0.336405	0.880483	0.033373	0.954485	0.999991	4.19017	5.81007e-14	8.90088e-13	0.031	0.472	0.137	0.031	5.194	1
20299	NM_009137	Ccl22	2.59894	1.85926e-05	0.000560853	0.198347	0.743939	0.97035	-0.0752466	0.901389	0.999991	4.27254	1.94538e-12	2.57051e-11	0.235	10.215	0.408	0.153	54.352	1
20304	NM_013653	Ccl5	1.99158	0.000470039	0.0090213	0.236872	0.677669	0.954969	-0.446125	0.43406	0.999991	3.71944	6.45158e-11	7.38036e-10	3.939	29.246	5.13	1.996	149.985	1
20308	NM_011338	Ccl9	1.37331	0.00222616	0.0310985	0.063486	0.888254	0.98548	-0.241681	0.593819	0.999991	3.64058	4.13427e-16	7.66997e-15	0.49	1.425	0.524	0.373	9.524	1
12443	NM_007631	Ccnd1	0.994723	0.00931081	0.0913129	0.320759	0.402575	0.905371	0.231568	0.545882	0.999991	4.19241	4.29454e-28	1.75715e-26	1.317	2.63	1.719	1.5	33.492	1
12445	NM_007632	Ccnd3	-0.454646	0.00132603	0.0207653	0.169749	0.230408	0.806531	0.0941382	0.506033	0.999991	-0.938119	3.60558e-11	4.24503e-10	155.767	103.391	175.945	162.163	79.661	1
12452	NM_007635	Ccng2	-0.555578	0.000775682	0.0135794	0.0894389	0.587524	0.940731	0.0224629	0.891684	0.999991	-0.497643	0.00260183	0.0080223	23.766	14.661	25.46	23.454	16.513	1
380694	NM_001045530	Ccnjl	-0.744683	0.000840883	0.0143881	-0.497849	0.0251618	0.303772	-0.0874134	0.693252	0.999991	-2.23963	2.8517e-22	8.24102e-21	4.562	2.439	3.203	4.15	0.885	1
72278	NM_001286544	Ccpg1	-0.394298	0.00602571	0.0666526	0.0750681	0.599986	0.943365	0.145226	0.31033	0.999991	0.074538	0.602616	0.729667	14.618	10.23	15.27	15.751	15.184	1
12768	NM_009912	Ccr1	2.77955	1.83486e-12	2.01342e-10	-0.710153	0.0878084	0.582684	0.235337	0.561896	0.999991	5.88465	7.80704e-51	9.77654e-49	0.218	1.874	0.113	0.257	21.484	1
12771	NM_009914	Ccr3	2.14756	4.07578e-05	0.00110214	-0.117049	0.835129	0.979392	0.464951	0.398624	0.999991	2.07923	7.33332e-05	0.00032985	0.009	0.117	0.007	0.021	0.119	1
12774	NM_009917	Ccr5	1.14956	0.000355388	0.00708062	-0.829781	0.0109609	0.178836	0.11441	0.723668	0.999991	2.87969	2.84703e-19	6.63773e-18	1.795	3.89	0.96	1.888	15.221	1
12769	NM_001166625	Ccr9	-1.39959	0.00376694	0.0465275	1.79329	0.000203283	0.00843302	0.00135356	0.997763	0.999991	-1.61785	0.000813135	0.00286713	9.587	2.592	43.104	9.32	2.259	1
12461	NM_007636	Cct2	0.519399	4.1098e-05	0.00110738	0.0314853	0.803733	0.979392	0.0522749	0.679903	0.999991	-0.151068	0.233193	0.366136	185.819	244.271	190.253	187.992	165.119	1
12462	NM_009836	Cct3	0.360618	0.00134633	0.0209747	0.0860083	0.44465	0.911747	0.0985812	0.381014	0.999991	-0.650567	7.74333e-09	7.06776e-08	152.906	179.848	162.616	159.338	95.894	0
12468	NM_007638	Cct7	0.321068	0.00600162	0.0665336	0.124697	0.286006	0.854607	0.0742055	0.525546	0.999991	-0.519019	9.1455e-06	5.04361e-05	126.174	144.349	137.784	129.408	86.729	0
17079	NM_008533	Cd180	2.69004	9.54007e-13	1.09443e-10	-1.35961	0.000824197	0.0260239	-2.05487	1.2978e-06	0.00147153	5.55545	1.22529e-49	1.4784e-47	0.372	2.791	0.108	0.043	26.145	1
12479	NM_007639	Cd1d1	0.489548	0.00658673	0.0708904	-0.24317	0.1791	0.760369	-0.146262	0.418938	0.999991	0.201368	0.264529	0.402751	12.55	16.245	10.563	10.889	14.269	1
74603	NM_001128132	Cd200r3	1.70343	0.000289146	0.00594102	0.0977269	0.841109	0.979392	0.816274	0.0879967	0.999991	3.20571	4.72688e-12	6.01967e-11	0.121	0.545	0.137	0.223	1.988	1
12483	NM_001043317	Cd22	2.61331	1.01111e-10	9.11381e-09	-0.961195	0.0248655	0.301362	-0.190999	0.648411	0.999991	5.26635	3.45936e-39	2.40265e-37	0.153	1.163	0.061	0.122	9.561	1
18106	NM_018729	Cd244	1.04204	0.000454879	0.00878602	-0.734655	0.0143246	0.212796	0.0384037	0.897625	0.999991	3.70476	6.95905e-36	4.10832e-34	2.208	4.374	1.282	2.192	33.494	1
12503	NM_001113391	Cd247	-0.967853	0.00538714	0.0613658	0.186273	0.592056	0.941256	0.228828	0.510363	0.999991	-2.62718	4.71537e-14	7.27099e-13	62.258	27.287	71.632	71.894	8.202	1
12487	NM_007642	Cd28	-1.13377	0.00235092	0.0324521	0.615947	0.098002	0.609504	0.161836	0.663823	0.999991	-1.95524	1.61814e-07	1.23149e-06	10.927	4.144	17.631	12.021	2.341	1
217303	NM_170758	Cd300a	3.83267	1.13417e-22	3.73363e-20	-0.107376	0.804462	0.979392	-0.174662	0.689657	0.999991	8.77743	1.66861e-113	9.51109e-111	0.033	0.795	0.03	0.025	33.963	1
217304	NM_199221	Cd300lb	1.65888	7.86459e-05	0.00197175	-0.216611	0.634818	0.947963	-0.27796	0.545581	0.999991	5.85956	1.26836e-47	1.39773e-45	0.051	0.215	0.04	0.035	5.661	1
217305	NM_145437	Cd300ld	2.55739	3.62594e-07	1.71587e-05	0.16394	0.761291	0.971704	0.222691	0.679981	0.999991	5.78877	5.90078e-32	2.81907e-30	0.01	0.231	0.016	0.016	3.2	1
246746	NM_145634	Cd300lf	3.86326	9.43302e-29	4.76148e-26	-0.874072	0.0294145	0.330315	-1.21857	0.0033648	0.604546	7.23869	8.47861e-98	4.00433e-95	0.183	3.44	0.074	0.041	44.315	1
12489	NM_001111058	Cd33	2.42787	1.01038e-07	5.27595e-06	-1.51542	0.00125987	0.0361239	0.20868	0.650034	0.999991	4.17397	4.76991e-20	1.16983e-18	0.478	3.353	0.107	0.55	14.415	1
12490	NM_001111059	Cd34	1.56185	0.00176712	0.0257551	-1.74739	0.0004714	0.0168645	-0.225247	0.652079	0.999991	1.42424	0.004354	0.0125825	25.945	90.765	5.18	20.791	87.168	1
12502	NM_009850	Cd3g	-0.438197	0.00537332	0.0613658	0.189373	0.22883	0.804618	0.343454	0.0290683	0.999991	-1.99237	1.32418e-36	8.29116e-35	496.131	333.028	564.688	612.079	119.938	0
12505	NM_009851	Cd44	1.53727	6.70226e-05	0.0017173	0.208413	0.589239	0.940731	0.0917773	0.812103	0.999991	3.14685	3.23207e-16	6.05052e-15	3.485	10.579	4.14	3.655	39.56	1
12514	NM_001291058	Cd68	1.75765	2.82191e-10	2.37401e-08	0.0658815	0.81667	0.979392	-0.355973	0.215435	0.999991	4.01089	1.21977e-47	1.3532e-45	2.008	6.751	2.104	1.459	37.735	1
12516	NM_009854	Cd7	1.62786	2.47639e-05	0.000724141	-0.858402	0.026365	0.311411	-0.236172	0.540995	0.999991	4.00693	2.98769e-25	1.03972e-23	33.124	107.965	16.732	26.467	724.601	1
16149	NM_001042605	Cd74	2.77056	2.30169e-08	1.36684e-06	0.102591	0.836335	0.979392	-0.178	0.720154	0.999991	6.86029	1.47088e-43	1.38145e-41	3.06	34.112	3.353	2.375	1036.84	1
15985	NM_008339	Cd79b	0.658346	0.00168084	0.0249294	0.15295	0.467953	0.918586	-0.254792	0.230009	0.999991	1.01635	1.15553e-06	7.64648e-06	6.134	8.994	6.843	5.005	12.579	1
12519	NM_009855	Cd80	1.35132	0.000131781	0.00302817	0.341174	0.338975	0.881432	-0.0351683	0.922	0.999991	3.39823	3.54152e-22	1.01634e-20	0.96	2.495	1.262	0.896	12.645	1
12521	NM_001271432	Cd82	0.386333	0.0015684	0.0238696	-0.736258	1.79074e-09	3.49149e-07	-0.0238377	0.845409	0.999991	0.99178	4.64877e-16	8.58594e-15	157.573	188.651	94.843	148.717	310.871	1
12522	NM_009856	Cd83	3.4366	8.48691e-17	1.52997e-14	0.448008	0.316318	0.872763	0.424675	0.344543	0.999991	6.83418	4.19264e-63	7.87549e-61	0.047	0.952	0.082	0.075	13.08	1
12524	NM_019388	Cd86	2.91532	5.42961e-10	4.30474e-08	0.456834	0.349338	0.888794	-0.238337	0.634397	0.999991	5.13354	3.32472e-28	1.37052e-26	0.052	0.719	0.087	0.033	4.466	1
12525	NM_001081110	Cd8a	-1.52379	0.00775657	0.0802307	0.432805	0.449212	0.913789	0.437409	0.444409	0.999991	-1.46067	0.0107029	0.0274677	4.562	0.799	6.937	6.904	0.924	1
84544	NM_032465	Cd96	-0.958763	1.27792e-09	9.67579e-08	-0.611892	9.87989e-05	0.00468409	-0.322552	0.0396102	0.999991	-1.02235	1.02689e-10	1.15081e-09	11.375	5.288	7.387	8.795	5.458	1
12531	NM_023117	Cdc25b	-0.695574	8.38567e-05	0.00207522	0.752065	1.9975e-05	0.00125129	0.160923	0.361916	0.999991	-1.06579	1.77054e-09	1.74208e-08	26.372	14.763	45.409	28.949	12.328	0
216150	NM_177613	Cdc34	0.472523	0.00421821	0.050857	0.213651	0.195923	0.776009	0.123513	0.45481	0.999991	-0.0470432	0.775946	0.858469	76.272	97.325	88.717	81.07	72.928	0
12550	NM_009864	Cdh1	1.04422	0.000108162	0.00257127	-1.44728	8.61674e-08	1.11988e-05	0.253742	0.347019	0.999991	2.70206	1.22727e-23	3.82769e-22	19.312	37.8	6.745	22.612	136.716	1
12557	NM_019753	Cdh17	4.17979	2.39337e-34	1.44971e-31	0.964888	0.00718599	0.12973	-0.962707	0.0171311	0.999991	7.56644	1.08943e-109	5.80913e-107	0.092	2.243	0.214	0.029	29.122	1
13445	NM_013812	Cdk2ap1	0.419207	0.00545174	0.0617932	0.0253064	0.86682	0.982382	0.0671032	0.656565	0.999991	-0.401124	0.00789388	0.0211245	159.918	196.3	163.184	163.892	119.27	1
107951	NM_130860	Cdk9	0.336046	0.00348195	0.0437208	0.072019	0.531564	0.932366	-0.0161207	0.888694	0.999991	0.442794	0.00011784	0.000506869	32.489	37.557	34.186	31.186	43.719	1
12581	NM_009878	Cdkn2d	-0.355949	0.00801444	0.0821902	0.64856	1.24306e-06	0.000118952	-0.0282553	0.833107	0.999991	-0.721388	8.2509e-08	6.56024e-07	58.591	41.702	92.147	55.568	34.825	1
26365	NM_001039185	Ceacam1	0.771422	0.00102661	0.0169716	0.73358	0.00180643	0.0467703	-0.0626408	0.793341	0.999991	2.62805	7.11171e-30	3.12651e-28	0.98	1.535	1.714	0.897	6.406	1
26367	NM_001113368	Ceacam2	0.674154	0.00619663	0.068145	0.937256	0.000127125	0.00578103	-0.0292911	0.907967	0.999991	2.58388	2.59081e-27	1.01725e-25	0.435	0.616	0.902	0.407	2.744	1
26368	NM_011927	Ceacam9	1.65676	0.00328618	0.0416773	0.182406	0.754582	0.971358	-0.207699	0.725135	0.999991	-0.358222	0.54535	0.679837	0.023	0.172	0.033	0.011	0.006	1
214932	NM_144815	Cecr5	-0.600008	0.000134261	0.00308047	0.175626	0.261896	0.835709	0.177277	0.257563	0.999991	-1.02178	9.0891e-11	1.02136e-09	26.437	15.834	29.929	28.902	12.7	0
74201	NM_028815	Cep97	-0.754582	0.00124914	0.0199323	0.0158457	0.945892	0.994557	0.200469	0.390488	0.999991	-1.79603	1.94978e-14	3.12305e-13	9.891	6.19	9.528	10.531	2.965	1
241447	NM_172856	Cers6	0.788436	0.00910702	0.0897252	-0.291663	0.335499	0.880483	0.100813	0.739049	0.999991	1.88255	4.59787e-10	4.86573e-09	6.057	9.945	4.93	6.32	24.07	1
227736	NM_025619	Cfap157	-0.910238	0.000100031	0.00239678	1.45259	3.7244e-11	1.13908e-08	0.456363	0.0411965	0.999991	-2.47995	8.07387e-21	2.10175e-19	1.898	0.892	5.368	2.542	0.284	0
14962	NM_001142706	Cfb	1.20749	0.00170607	0.0252049	0.314848	0.417584	0.907426	0.0215627	0.955969	0.999991	3.88517	2.26167e-24	7.4325e-23	0.427	1.032	0.55	0.414	8.653	0
12631	NM_007687	Cfl1	0.454166	3.91205e-06	0.000141385	-0.00162507	0.986825	0.995097	0.00360198	0.970804	0.999991	0.309333	0.00166814	0.00540781	808.739	1014.84	807.936	789.304	990.755	1
18636	NM_008823	Cfp	3.85787	6.15214e-51	7.1663e-48	0.190136	0.472165	0.919293	0.159831	0.546475	0.999991	6.79711	7.95766e-155	1.64425e-151	1.507	23.142	1.735	1.612	207.882	1
72170	NM_133928	Chchd4	0.54889	3.10122e-05	0.000872894	-0.0523438	0.693337	0.956791	-0.0450349	0.734659	0.999991	-0.6078	5.88312e-06	3.36498e-05	16.522	22.194	15.951	15.57	10.644	1
71884	NM_027979	Chit1	1.73668	0.00115189	0.0186557	-1.61465	0.00277139	0.0656366	-0.544338	0.310511	0.999991	0.290934	0.586825	0.71673	1.078	4.675	0.194	0.621	1.4	1
69993	NM_001163640	Chn2	0.985088	0.00262072	0.0352135	-1.11056	0.00073232	0.0237367	-0.239472	0.465372	0.999991	2.77624	2.09282e-17	4.29742e-16	6.046	11.564	2.619	4.907	47.604	1
77590	NM_029935	Chst15	0.800926	0.000327091	0.00657788	-0.562671	0.0118997	0.189982	-0.220506	0.323827	0.999991	0.811393	0.000272958	0.00108279	8.176	13.271	5.504	6.785	14.448	1
109006	NM_134141	Ciapin1	0.350601	0.00112285	0.0182439	0.16201	0.13294	0.68594	0.132613	0.219217	0.999991	-0.073668	0.49573	0.635966	9.058	10.586	10.164	9.641	8.507	1
23991	NM_011870	Cib1	0.806079	1.29074e-07	6.58105e-06	0.00426044	0.977851	0.995097	0.166773	0.276787	0.999991	1.39486	5.30313e-20	1.29103e-18	25.203	40.649	25.224	27.532	66.476	1
12265	NM_007575	Ciita	2.33196	8.08422e-11	7.41936e-09	0.539955	0.143606	0.707837	0.26421	0.478692	0.999991	6.822	1.71785e-82	6.45365e-80	0.102	0.611	0.165	0.127	18.754	1
67006	NM_025902	Cisd2	0.291689	0.00961712	0.0934137	0.0974184	0.387951	0.900177	0.00186732	0.986818	0.999991	0.430257	0.000132038	0.000560071	14.912	16.705	15.986	14.499	19.875	1
12724	NM_009900	Clcn2	1.41715	1.08289e-14	1.547e-12	0.587652	0.0015309	0.0414385	0.222054	0.235362	0.999991	-0.218861	0.247168	0.382627	1.477	3.705	2.254	1.675	1.25	1
12737	NM_016674	Cldn1	1.49698	0.00934172	0.0914426	0.116811	0.840864	0.979392	0.358634	0.536913	0.999991	3.45347	1.64827e-09	1.62371e-08	0.026	0.167	0.033	0.047	1.102	1
12740	NM_009903	Cldn4	-1.29464	0.0084997	0.085693	1.54312	0.00162438	0.0432373	0.825345	0.0920597	0.999991	-2.87169	7.66917e-09	7.00898e-08	3.236	0.935	11.862	6.438	0.198	1
17312	NM_001204252	Clec10a	2.98058	9.68778e-15	1.39716e-12	-0.572835	0.205344	0.782918	-1.39698	0.00433256	0.674195	2.41642	5.27674e-10	5.53807e-09	0.109	1.132	0.056	0.005	0.803	1
93675	NM_001289706	Clec2i	-0.952543	0.00108746	0.0178025	0.337698	0.243	0.820236	0.0679736	0.814479	0.999991	-0.827594	0.00449944	0.012935	4.543	2.04	5.821	4.598	2.447	1
269799	NM_199311	Clec4a1	1.41867	0.0025746	0.0346552	0.447396	0.366122	0.893836	-0.147706	0.775042	0.999991	6.86818	1.88321e-55	2.73066e-53	0.025	0.143	0.054	0.015	10.353	1
26888	NM_001170333	Clec4a2	5.45313	4.84472e-41	3.66818e-38	0.160215	0.742298	0.969889	0.298586	0.537642	0.999991	9.24329	4.55661e-116	2.89695e-113	0.006	1.83	0.013	0.016	30.151	1
474145	NM_001005860	Clec4a4	4.08752	9.61818e-21	2.64815e-18	0.0877696	0.865195	0.982086	0.139969	0.786805	0.999991	8.15117	3.84389e-80	1.22191e-77	0.007	1.28	0.014	0.014	26.824	1
224796	NM_172621	Clic5	-1.25912	0.00601115	0.0665401	-0.0510669	0.908391	0.988534	-0.0723776	0.870677	0.999991	-1.3313	0.00380279	0.0111692	0.133	0.039	0.128	0.123	0.039	1
26889	NM_012000	Cln8	0.429946	0.00864486	0.0864087	0.0924378	0.574052	0.937661	0.167868	0.30734	0.999991	2.26351	1.79745e-44	1.77915e-42	1.896	2.35	2.035	2.078	9.258	1
12729	NM_023671	Clns1a	0.270967	0.00672183	0.0721029	-0.00809193	0.935576	0.991725	0.0514742	0.607151	0.999991	-0.69535	4.75587e-12	6.04727e-11	30.248	33.404	30.109	30.49	18.381	1
53895	NM_017393	Clpp	0.421652	0.00905597	0.0892803	0.334677	0.038419	0.384881	0.124904	0.4407	0.999991	-0.284877	0.0797008	0.152908	18.545	22.843	23.444	19.617	14.99	1
12757	NM_001080385	Clta	0.492223	0.000572261	0.0105938	-0.0877819	0.539384	0.933437	-0.0232887	0.870656	0.999991	0.96047	1.76601e-11	2.13081e-10	138.274	178.181	129.896	132.089	267.988	1
74438	NM_028940	Clvs1	0.914955	0.00799106	0.0820397	-0.0242691	0.9443	0.994322	-0.220047	0.527627	0.999991	-0.230031	0.508887	0.647471	0.867	1.589	0.852	0.709	0.718	1
215890	NM_175448	Clvs2	3.9297	1.30537e-13	1.6895e-11	0.101565	0.859943	0.9816	0.698687	0.216236	0.999991	1.30697	0.0182286	0.0435684	0.003	0.515	0.006	0.025	0.055	1
12763	NM_001284519	Cmah	-1.10994	0.000127798	0.00295457	-0.282016	0.330067	0.877431	0.158767	0.583396	0.999991	-2.87269	5.28422e-23	1.57953e-21	10.843	4.379	8.931	11.79	1.282	1
66588	NM_025647	Cmpk1	0.421607	0.000380629	0.00749527	0.0482605	0.684744	0.955565	0.0707053	0.552073	0.999991	0.203934	0.0860208	0.163289	35.695	43.789	37.008	36.413	40.597	1
22169	NM_020557	Cmpk2	0.561112	0.00811197	0.0827203	1.29105	8.82338e-10	1.81088e-07	-0.401815	0.0620964	0.999991	1.10571	1.59228e-07	1.21516e-06	2.082	2.849	5.282	1.512	4.545	0
70031	NM_027294	Cmtm8	1.11942	1.47472e-06	5.93926e-05	-1.02657	4.357e-05	0.00241239	0.0152401	0.949286	0.999991	1.06672	4.6162e-06	2.71165e-05	2.162	4.445	1.006	2.115	4.629	1
12790	NM_009918	Cnga3	2.48442	9.18343e-07	3.87367e-05	-0.0675735	0.898059	0.986925	0.246793	0.637616	0.999991	3.54188	2.00296e-12	2.64237e-11	0.033	0.348	0.03	0.043	0.9	1
98417	NM_030131	Cnih4	0.362149	0.00271951	0.0361559	0.275369	0.022803	0.28824	0.075138	0.53615	0.999991	0.251664	0.0375937	0.0813275	6.495	7.652	7.888	6.63	7.658	1
12798	NM_007725	Cnn2	0.610393	0.00481102	0.0565193	-0.149219	0.490829	0.922134	-0.262058	0.226334	0.999991	1.50028	4.16449e-12	5.36547e-11	101.349	143.278	91.16	81.226	292.756	1
12799	NM_009923	Cnp	-0.449669	0.000821545	0.0142505	-0.00220436	0.9869	0.995097	0.0944293	0.481819	0.999991	-0.709298	1.34951e-07	1.03997e-06	56.491	37.665	56.463	58.757	33.932	1
72029	NM_028065	Cnpy3	0.705919	4.38292e-07	2.00456e-05	-0.0720208	0.607556	0.945413	0.106121	0.448943	0.999991	1.28319	3.6861e-20	9.14884e-19	25.009	37.535	23.787	26.14	60.906	1
12801	NM_007726	Cnr1	1.67156	3.03624e-05	0.000859398	0.378229	0.365408	0.893836	0.63995	0.122591	0.999991	1.83889	4.18972e-06	2.48485e-05	0.041	0.155	0.059	0.071	0.192	1
12802	NM_009924	Cnr2	0.780778	0.00193609	0.0277225	-0.121378	0.632598	0.947856	0.0163144	0.948726	0.999991	2.44249	1.69214e-22	4.92449e-21	1.563	2.518	1.438	1.544	9.051	1
52469	NM_026618	Coa3	0.415463	0.00959514	0.0932601	0.263389	0.100913	0.615847	0.0923554	0.565831	0.999991	0.165542	0.30294	0.44568	34.723	42.546	41.786	35.915	38.559	1
76178	NM_198006	Coa5	0.471182	0.00172392	0.0253696	-0.157284	0.296257	0.860004	0.0767463	0.610119	0.999991	0.251139	0.0950109	0.177221	20.753	26.419	18.659	21.348	24.471	1
69893	NM_027250	Coa7	0.292502	0.0051673	0.0595045	0.00946442	0.928698	0.990429	0.122609	0.245516	0.999991	-0.329307	0.00221456	0.00694945	3.842	4.31	3.876	4.059	3.011	1
12812	NM_016706	Coil	0.25777	0.00788333	0.0812643	-0.0287045	0.768775	0.974194	0.16588	0.0884167	0.999991	-0.163135	0.0961479	0.178897	8.932	9.773	8.772	9.741	7.871	1
12821	NM_001290825	Col17a1	1.50259	0.000830079	0.0142911	1.23107	0.00644643	0.120855	0.51054	0.268521	0.999991	4.27673	2.09323e-22	6.08102e-21	0.032	0.125	0.109	0.056	1.206	1
12841	NM_009936	Col9a3	0.694601	0.00112007	0.0182183	-0.0200467	0.926306	0.990345	-0.196023	0.369453	0.999991	1.14034	7.22318e-08	5.77925e-07	1.252	1.892	1.233	1.044	2.811	0
52245	NM_175095	Commd2	0.289248	0.00502601	0.0584105	0.108064	0.296541	0.860015	0.0822497	0.427979	0.999991	0.0274518	0.791398	0.869686	6.638	7.429	7.166	6.813	6.664	1
12846	NM_001111062	Comt	0.531926	0.00833119	0.0841623	0.551439	0.00623059	0.118518	0.14712	0.466825	0.999991	1.38981	4.63139e-12	5.90717e-11	7.221	9.65	10.749	7.796	19.268	1
67876	NM_001039710	Coq10b	0.901633	3.85864e-08	2.22172e-06	0.026143	0.87653	0.983323	0.0603449	0.720242	0.999991	1.51378	1.07885e-20	2.78211e-19	2.655	4.601	2.717	2.677	7.651	1
71883	NM_027978	Coq2	0.303062	0.000351498	0.00701283	0.0846361	0.319756	0.872945	0.106892	0.209258	0.999991	0.0595369	0.484344	0.62553	26.393	29.807	28.044	27.511	27.163	1
12850	NM_009940	Coq7	0.443751	0.000978512	0.016355	0.222973	0.0992241	0.612707	0.0296072	0.827846	0.999991	-0.426852	0.00196519	0.00624463	11.672	14.591	13.651	11.577	8.54	0
12721	NM_009898	Coro1a	0.495389	4.01306e-05	0.00109102	-0.690137	1.0815e-08	1.73909e-06	-0.10719	0.374368	0.999991	0.816782	1.2729e-11	1.5517e-10	437.419	565.618	269.866	394.794	764.891	1
107684	NM_001164804	Coro2a	0.844155	2.60934e-05	0.00075267	-1.68033	6.71863e-17	9.35286e-14	-0.44751	0.0259065	0.999991	1.28397	1.58676e-10	1.75095e-09	53.682	89.53	16.294	37.985	132.361	1
72042	NM_028071	Cotl1	1.2813	6.22475e-16	1.02458e-13	-0.260282	0.100919	0.615847	-0.363546	0.0219812	0.999991	1.76885	6.1774e-29	2.625e-27	119.027	268.324	98.994	89.25	408.564	1
12858	NM_007747	Cox5a	0.381837	0.00492617	0.0575151	0.0110161	0.935407	0.991725	0.0197017	0.884778	0.999991	0.257032	0.0584796	0.1178	140.084	167.357	141.041	138.423	165.558	1
76703	NM_029706	Cpb1	3.407	3.67868e-12	3.92297e-10	-0.228547	0.654635	0.951398	-0.273738	0.593271	0.999991	2.3762	1.4005e-06	9.10355e-06	0.14	2.66	0.108	0.098	1.244	1
54451	NM_018813	Cpsf3	0.317178	0.0104251	0.0996004	-0.0507366	0.682483	0.955565	-0.00674406	0.956642	0.999991	0.345038	0.00532975	0.015001	28.482	32.505	27.568	27.612	35.833	1
12909	NM_007761	Crcp	0.315353	0.0099073	0.0957411	-0.019136	0.876237	0.983322	0.140316	0.252811	0.999991	0.0322807	0.792683	0.870501	14.914	16.998	14.724	15.973	15.049	1
77128	NM_029870	Crebrf	-0.57148	0.00127072	0.0201482	0.231869	0.187569	0.769719	0.0800374	0.649777	0.999991	0.977986	2.38101e-08	2.04352e-07	2.506	1.525	2.968	2.563	4.941	1
433375	NM_011804	Creg1	0.671021	1.73679e-06	6.849e-05	0.100412	0.476306	0.920236	0.0612721	0.664193	0.999991	0.316508	0.0245121	0.0561353	11.722	17.177	12.609	11.877	14.488	1
12919	NM_198408	Crhbp	2.08033	1.08154e-05	0.000355267	1.29346	0.00634648	0.119778	1.10352	0.0200234	0.999991	-1.36853	0.0049856	0.014131	0.567	3.036	1.755	1.43	0.141	1
78892	NM_030209	Crispld2	2.01911	8.72529e-06	0.000291671	1.36488	0.00285865	0.0667504	-0.665653	0.169617	0.999991	2.23328	8.37046e-07	5.65211e-06	0.061	0.33	0.212	0.028	0.426	1
57914	NM_016715	Crlf2	0.641894	0.00175189	0.0256814	-0.292997	0.155047	0.72875	-0.353113	0.0868757	0.999991	1.48747	3.66147e-13	5.15099e-12	16.059	23.229	13.038	12.065	45.834	1
72832	NM_145123	Crtac1	1.78873	5.70114e-17	1.05283e-14	-0.691924	0.00317888	0.0725977	-1.2389	5.1111e-07	0.000724414	1.28232	2.83441e-09	2.724e-08	0.729	2.42	0.439	0.28	1.817	0
224273	NM_174848	Crybg3	0.652772	4.2099e-05	0.00113234	0.0816574	0.614181	0.946814	-0.16519	0.313526	0.999991	2.56006	5.53092e-61	9.52354e-59	0.824	1.197	0.876	0.716	4.963	1
68631	NM_030004	Cryl1	0.373619	0.00264842	0.0355226	-0.160305	0.205016	0.782491	-0.122905	0.331819	0.999991	0.63744	2.47733e-07	1.83799e-06	6.794	8.075	6.081	6.058	10.499	1
12974	NM_026444	Cs	0.416628	0.00884368	0.0879894	-0.141409	0.374421	0.897557	-0.000704129	0.996471	0.999991	0.192048	0.227588	0.359383	86.159	105.614	78.384	84.079	97.553	1
12978	NM_001037859	Csf1r	1.65894	0.00291332	0.0379659	0.411943	0.460966	0.917352	0.0581495	0.917237	0.999991	5.71171	9.85979e-25	3.3194e-23	0.112	0.663	0.189	0.107	25.262	1
12984	NM_007781	Csf2rb2	1.52154	0.00166595	0.0248058	-0.356069	0.466049	0.918586	-1.11664	0.0235408	0.999991	4.75071	6.93452e-23	2.04692e-21	0.219	0.792	0.166	0.068	11.914	1
78752	NM_030165	Csgalnact2	0.814834	2.69595e-06	0.000100307	0.0413907	0.812989	0.979392	-0.270477	0.124176	0.999991	2.67032	3.51085e-54	4.79623e-52	3.446	5.609	3.565	2.764	22.499	1
215418	NM_153287	Csrnp1	-0.722484	1.44336e-07	7.28558e-06	0.116066	0.395551	0.903603	0.117181	0.391195	0.999991	-0.677044	8.23927e-07	5.5658e-06	18.438	10.135	20.062	19.45	11.29	1
13010	NM_009976	Cst3	1.16938	2.91564e-09	1.98881e-07	0.0888364	0.652618	0.951267	0.135251	0.493178	0.999991	3.75709	2.55299e-81	8.79187e-79	59.658	125.526	63.646	63.792	854.416	1
13017	NM_009980	Ctbp2	0.736095	0.00587274	0.0652944	0.0818305	0.760608	0.971704	-0.359812	0.182923	0.999991	1.15361	1.5146e-05	7.92287e-05	1.95	3.054	2.089	1.452	4.491	1
13024	NM_007796	Ctla2a	-1.77346	3.05881e-06	0.000112426	-0.545656	0.150452	0.719157	0.020622	0.956648	0.999991	-3.85989	7.12954e-24	2.26202e-22	38.596	8.889	25.179	37.569	1.824	0
13025	NM_001145801	Ctla2b	-1.70393	1.67989e-05	0.000515995	-0.467718	0.235409	0.812548	-0.011159	0.977398	0.999991	-3.23316	8.25916e-16	1.49044e-14	15.101	3.596	10.328	14.492	1.026	1
12477	NM_009843	Ctla4	-1.42825	1.69821e-15	2.73575e-13	-0.667388	0.000193496	0.00811154	-0.149736	0.402657	0.999991	-5.0047	1.66004e-155	3.92007e-152	69.009	22.909	43.131	59.841	1.917	1
18163	NM_008729	Ctnnd2	1.3469	0.00200501	0.0285893	0.77603	0.0764293	0.547609	0.501484	0.254015	0.999991	5.75002	1.91994e-40	1.46929e-38	0.111	0.324	0.22	0.17	11.378	1
13030	NM_007798	Ctsb	0.464486	0.00752616	0.0787077	0.151135	0.384677	0.900177	-0.352536	0.0427709	0.999991	0.879087	4.19365e-07	2.98027e-06	25.095	31.871	27.999	18.994	46.328	1
13035	NM_007800	Ctsg	-1.46426	0.00639269	0.0696435	2.12904	8.33721e-06	0.000586618	-0.253205	0.618217	0.999991	-1.44827	0.00702404	0.0190841	0.187	0.014	1.174	0.139	0.015	0
13040	NM_021281	Ctss	1.90845	1.6936e-06	6.73129e-05	-0.210141	0.599897	0.943365	-1.24167	0.00208608	0.499719	4.87448	1.85214e-34	1.01714e-32	3.516	14.623	2.934	1.16	155.285	1
64138	NM_022325	Ctsz	0.618107	8.89185e-06	0.000296326	0.192969	0.166361	0.744708	-0.201409	0.149865	0.999991	2.37585	6.30243e-66	1.33563e-63	28.409	40.088	32.582	24.001	149.008	0
20312	NM_009142	Cx3cl1	1.19464	0.00922948	0.0906368	0.559103	0.224035	0.800205	0.187499	0.684086	0.999991	2.93044	1.52032e-10	1.68325e-09	0.528	1.342	0.867	0.593	6.007	1
13051	NM_009987	Cx3cr1	-1.28602	0.00350544	0.0439332	-0.529287	0.228152	0.803974	0.233329	0.594631	0.999991	-1.53263	0.000512276	0.00190333	1.974	0.622	1.296	2.311	0.548	1
12145	NM_007551	Cxcr5	-1.35525	1.77015e-07	8.84666e-06	0.648636	0.0101172	0.169141	0.108518	0.66862	0.999991	-1.71066	7.05211e-11	8.01729e-10	2.587	0.874	4.151	2.705	0.726	1
67393	NM_133687	Cxxc5	-0.533211	0.00184129	0.0267075	0.285461	0.0948437	0.599179	0.170526	0.318512	0.999991	-0.416541	0.0149424	0.0366357	39.776	24.907	48.73	43.583	29.281	1
109754	NM_029787	Cyb5r3	0.635081	0.00287687	0.0377508	0.000426086	0.998406	0.99929	0.0671706	0.752808	0.999991	2.04039	9.11358e-22	2.52764e-20	27.386	39.412	27.491	27.838	116.553	1
13057	NM_007806	Cyba	0.749493	4.4363e-07	2.01738e-05	-0.215658	0.14716	0.71279	-0.183094	0.218478	0.999991	1.50908	2.54185e-24	8.32015e-23	114.143	176.827	97.998	97.223	325.107	1
66445	NM_025567	Cyc1	0.38433	0.000325776	0.00656014	0.16946	0.113365	0.644646	0.139964	0.191188	0.999991	-0.298332	0.00543229	0.0152455	80.21	95.952	90.389	85.797	64.391	1
13063	NM_007808	Cycs	0.578055	0.000217658	0.00466854	0.249357	0.110884	0.638688	0.14707	0.34723	0.999991	-0.384106	0.014198	0.0350735	33.561	46.074	40.013	36.369	25.284	1
13110	NM_010008	Cyp2j6	-1.39817	0.00276949	0.0366166	-0.549185	0.238212	0.816061	-0.139371	0.764481	0.999991	-1.46246	0.0017587	0.0056636	1.614	0.447	1.018	1.377	0.461	0
13113	NM_007819	Cyp3a13	1.45285	0.00554579	0.0624386	-0.362357	0.521387	0.929885	-0.190727	0.734512	0.999991	3.0729	1.24037e-09	1.24188e-08	0.01	0.066	0.003	0.005	0.277	1
72054	NM_024444	Cyp4f18	2.49508	1.14454e-10	1.00766e-08	-0.849636	0.0394651	0.391589	-1.90713	1.41449e-05	0.0109353	5.6755	2.306e-49	2.72272e-47	0.37	2.475	0.171	0.041	29.547	1
13121	NM_020010	Cyp51	0.663892	4.70643e-06	0.000167299	-0.465117	0.00138222	0.0386377	-0.0189102	0.896423	0.999991	-0.00111815	0.993857	0.999984	22.736	33.143	16.498	21.825	22.411	1
72318	NM_028195	Cyth4	0.520631	0.00171513	0.025314	-0.17885	0.28226	0.850598	-0.280207	0.0922528	0.999991	1.44326	3.21449e-18	6.86505e-17	23.483	31.013	20.745	18.701	64.202	1
330286	NM_194061	D630045J12Rik	0.837103	0.000146362	0.00330307	-0.27685	0.214559	0.789501	0.632197	0.00421679	0.674195	-0.254043	0.254776	0.391435	0.701	1.171	0.577	1.067	0.578	1
28040	NM_138594	D6Wsu163e	0.362109	0.00603968	0.0667583	0.0276856	0.834738	0.979392	0.0157194	0.905871	0.999991	0.959855	2.2163e-13	3.20241e-12	6.36	7.497	6.51	6.244	12.322	1
69635	NM_029653	Dapk1	-0.788935	5.38767e-07	2.41377e-05	-0.216913	0.167067	0.745849	0.121279	0.439379	0.999991	-1.60509	3.99938e-24	1.29121e-22	11.358	5.943	9.859	12.004	3.615	1
13169	NM_001146309	Dbnl	0.540518	6.43613e-05	0.00165471	-0.178652	0.187107	0.769145	0.0284286	0.833684	0.999991	1.18446	1.90091e-18	4.15636e-17	62.184	83.065	54.988	61.773	141.127	1
66422	NM_023203	Dctpp1	0.466785	0.00421459	0.0508538	0.288905	0.0767139	0.548137	0.149731	0.359333	0.999991	-0.618331	0.000162635	0.000675806	70.313	89.421	86.08	75.894	44.831	0
67880	NM_026428	Dcxr	0.70844	0.00544983	0.0617932	0.317935	0.213712	0.789501	0.0778241	0.761566	0.999991	1.91958	3.66123e-14	5.7365e-13	6.709	10.274	8.464	6.877	26.798	0
13195	NM_016672	Ddc	-1.56916	8.56126e-09	5.51673e-07	0.745062	0.00477027	0.0981396	0.0201808	0.939441	0.999991	-3.16521	3.12282e-27	1.21248e-25	3.48	0.998	6.018	3.426	0.31	1
12305	NM_001198833	Ddr1	1.0498	0.00704141	0.074409	0.661666	0.0897733	0.587025	0.427679	0.273348	0.999991	3.58103	2.95415e-20	7.38762e-19	1.013	2.121	1.731	1.375	16.282	1
52513	NM_026538	Ddx56	0.338957	0.00321575	0.04099	0.092212	0.423583	0.908793	0.11561	0.315903	0.999991	-0.454765	8.61537e-05	0.000381699	15.809	18.32	16.892	16.635	11.367	0
23854	NM_001253784	Def8	0.923148	5.1052e-10	4.06885e-08	0.0278438	0.851911	0.980271	0.0219205	0.883217	0.999991	-0.0892301	0.550054	0.683793	9.374	16.405	9.617	9.25	8.736	1
68184	NM_026603	Denr	0.43754	0.000722656	0.0129047	0.120624	0.351953	0.889087	0.0474819	0.714262	0.999991	0.219414	0.0903234	0.170012	27.569	34.239	29.941	27.7	31.743	1
67800	NM_026384	Dgat2	1.09856	0.00866596	0.0864968	0.422637	0.318278	0.872945	0.0316917	0.941013	0.999991	1.82498	1.10522e-05	5.95865e-05	0.223	0.514	0.326	0.222	0.996	1
13139	NM_016811	Dgka	-0.545919	2.63085e-05	0.000755958	0.673185	1.94462e-07	2.28061e-05	0.170457	0.18823	0.999991	-0.919336	1.63966e-12	2.18401e-11	32.535	20.292	52.345	35.38	16.844	0
56077	NM_019505	Dgke	-0.701949	0.00176927	0.0257616	-0.197304	0.379145	0.899726	0.275816	0.218698	0.999991	-2.04284	1.29572e-19	3.0862e-18	16.157	8.932	14.14	18.96	3.677	0
380921	NM_001081336	Dgkh	1.08229	0.000829121	0.0142911	-0.31348	0.351131	0.889087	-0.0270795	0.935286	0.999991	3.79292	5.13879e-33	2.62985e-31	0.246	0.52	0.193	0.232	4.174	1
104418	NM_001166597	Dgkz	-0.377385	0.00372684	0.0461452	0.142845	0.271985	0.841287	-0.0343899	0.791476	0.999991	-0.580346	8.24498e-06	4.57655e-05	76.64	55.798	87.941	73.729	54.44	1
13360	NM_007856	Dhcr7	-0.231127	0.00193689	0.0277225	-0.230861	0.00196049	0.0497972	0.0348025	0.639833	0.999991	-1.12354	1.35464e-49	1.62262e-47	29.078	22.652	24.866	28.885	13.133	1
330817	NM_001039514	Dhps	0.264495	0.00649082	0.0703583	0.209743	0.0310987	0.341616	0.0904956	0.354483	0.999991	-0.0447724	0.647651	0.766798	16.453	18.093	19.081	16.964	15.751	1
192970	NM_177564	Dhrs11	0.670371	0.00546739	0.0618317	0.442405	0.0674911	0.518074	-0.124003	0.611951	0.999991	2.01802	3.05517e-17	6.18897e-16	3.125	4.652	4.317	2.751	13.258	1
20148	NM_011303	Dhrs3	-0.871144	0.000135582	0.00309205	0.0892713	0.693369	0.956791	0.411721	0.0686047	0.999991	-1.20214	1.59386e-07	1.21581e-06	9.012	4.632	9.984	12.024	3.893	1
64340	NM_178380	Dhx38	0.782957	1.74934e-08	1.06816e-06	-0.0569933	0.68221	0.955565	0.0462664	0.739577	0.999991	0.755969	5.31604e-08	4.3459e-07	23.485	37.207	22.672	23.633	39.415	1
13371	NM_010050	Dio2	-1.12686	2.60947e-05	0.00075267	-0.485474	0.063545	0.505203	-0.434024	0.0973705	0.999991	-3.18059	6.45462e-24	2.05975e-22	0.528	0.21	0.37	0.373	0.042	1
12945	NM_007769	Dmbt1	-1.6509	7.26769e-05	0.00184346	-1.348	0.00102968	0.0308273	-0.661606	0.0998909	0.999991	-2.18918	3.30584e-07	2.39358e-06	0.194	0.045	0.065	0.111	0.028	1
22791	NM_009584	Dnajc2	0.416586	0.00226356	0.0315337	-0.0414363	0.761617	0.971704	0.00831709	0.95145	0.999991	-0.380686	0.00537371	0.0151016	49.955	61.139	48.508	48.938	37.755	1
13421	NM_007870	Dnase1l3	4.05949	1.19391e-25	5.31744e-23	0.0690576	0.867876	0.982382	0.256721	0.534249	0.999991	8.52523	3.25396e-108	1.68087e-105	0.067	1.745	0.072	0.083	53.369	1
13423	NM_010062	Dnase2a	1.08171	7.50335e-07	3.22793e-05	-0.0239514	0.913412	0.989044	-0.0825523	0.708194	0.999991	1.67273	1.75257e-14	2.82635e-13	6.251	12.416	6.146	5.684	20.449	0
13435	NM_007872	Dnmt3a	0.7865	1.87098e-06	7.30213e-05	-0.354947	0.0316187	0.343446	0.0307314	0.852333	0.999991	1.47	5.00728e-19	1.14799e-17	20.634	33.755	15.91	20.525	58.747	1
13446	NM_010069	Doc2a	0.385671	0.00251677	0.0340889	0.143671	0.262003	0.835709	0.138641	0.279651	0.999991	-0.170236	0.186372	0.30628	7.504	8.993	8.315	8.041	6.587	0
68813	NM_177780	Dock5	1.16298	1.51052e-07	7.59927e-06	-0.158039	0.478025	0.920652	0.178559	0.422038	0.999991	3.11165	4.34166e-45	4.37608e-43	1.532	3.228	1.377	1.692	14.069	1
116905	NM_144491	Dph1	0.367077	0.000290821	0.00596735	0.0558254	0.58398	0.940731	0.120079	0.238942	0.999991	0.104495	0.305136	0.448267	10.561	12.48	11.016	11.122	11.219	1
381738	NM_001033460	Drc1	-0.816317	0.0025546	0.0344473	-0.965104	0.000364127	0.0138556	-0.221176	0.413034	0.999991	-3.76944	1.56157e-41	1.28422e-39	13.574	6.843	6.708	11.205	0.827	1
330830	NM_001042715	Drc7	-0.863667	0.00873771	0.0870494	-0.165536	0.614148	0.946814	0.56415	0.0851784	0.999991	-3.18107	8.14922e-21	2.11803e-19	4.286	2.042	3.776	6.31	0.363	1
13492	NM_013503	Drd5	2.88842	1.25358e-09	9.53914e-08	-0.78424	0.137861	0.69887	0.0276756	0.956717	0.999991	-0.596877	0.254831	0.391483	0.041	0.477	0.013	0.041	0.018	0
13508	NM_031174	Dscam	2.0825	0.000100339	0.00240037	0.323599	0.549889	0.93624	0.177911	0.742933	0.999991	3.65147	7.79627e-12	9.71888e-11	0.03	0.229	0.045	0.036	0.958	1
13518	NM_001276764	Dst	-0.886478	0.0019715	0.0281379	-0.294179	0.304336	0.865721	-0.00204164	0.994312	0.999991	-1.52982	9.40579e-08	7.43557e-07	10.302	4.924	8.385	9.969	3.195	1
213452	NM_172516	Dstyk	1.18564	1.37491e-13	1.76442e-11	0.0682914	0.675257	0.954969	0.253859	0.118518	0.999991	1.32902	1.0152e-16	1.97892e-15	1.318	2.786	1.39	1.519	3.331	1
207521	NM_172442	Dtx4	-0.889527	0.00116536	0.0188537	0.23057	0.395609	0.903603	0.352521	0.193895	0.999991	0.0800896	0.76817	0.853494	1.601	0.761	1.907	2.001	1.686	1
224907	NM_144858	Dus3l	0.267768	0.00703067	0.0743474	0.325204	0.00105452	0.0313304	0.169316	0.0889596	0.999991	0.112913	0.256731	0.39367	17.577	19.392	22.117	19.132	18.798	1
19252	NM_013642	Dusp1	0.647464	1.53134e-05	0.000477143	-0.213164	0.157677	0.73307	0.0822864	0.584565	0.999991	1.29973	3.06701e-18	6.57557e-17	11.648	16.823	10.067	11.967	28.717	1
80915	NM_023173	Dusp12	0.35172	0.00759472	0.0792604	0.124487	0.348082	0.888342	0.216518	0.102444	0.999991	0.225018	0.089111	0.168179	6.05	7.088	6.628	6.815	6.997	1
105352	NM_001037955	Dusp22	0.666132	0.00215887	0.0303163	-0.621444	0.00663863	0.122834	-0.0405118	0.855914	0.999991	2.60741	3.79677e-35	2.16416e-33	1.918	2.915	1.274	1.866	12.588	1
67603	NM_026268	Dusp6	0.657983	0.00215538	0.0303054	-0.380209	0.0777451	0.553651	0.159261	0.458778	0.999991	1.53183	8.21019e-13	1.12254e-11	7.089	10.386	5.412	7.738	20.968	1
69190	NM_027727	Dym	0.619185	1.55719e-05	0.000483207	-0.0773676	0.590675	0.941099	0.0526376	0.714311	0.999991	0.54198	0.000156797	0.000653682	16.195	22.863	15.389	16.398	23.422	1
235661	NM_146229	Dync1li1	0.528053	0.00214537	0.0301926	-0.070544	0.682413	0.955565	0.0714435	0.678499	0.999991	0.449645	0.00898125	0.0236213	20.444	27.135	19.564	20.887	27.707	1
68097	NM_026556	Dynll2	0.41128	0.00426854	0.0513004	0.0414379	0.773676	0.975796	0.145178	0.313637	0.999991	0.507628	0.000419169	0.00158876	26.805	32.711	27.68	28.907	37.907	1
100310872	NM_001166629	Dynlt1a	0.332321	0.0011915	0.019215	0.00462332	0.964107	0.995097	-0.0175958	0.8641	0.999991	0.370603	0.000300977	0.00118203	15.449	17.818	15.487	14.771	19.746	1
21648	NM_009342	Dynlt1b	0.319661	0.000982854	0.0163916	-0.00381608	0.968682	0.995097	-0.00926406	0.924107	0.999991	0.38275	7.92904e-05	0.000354331	108.765	124.26	108.441	104.661	140.129	1
100040563	NM_001166630	Dynlt1c	0.318423	0.000410082	0.00799211	0.00323179	0.971413	0.995097	-0.0123081	0.891467	0.999991	0.364883	5.13842e-05	0.000239532	366.399	418.242	367.103	351.639	466.197	1
100040531	NM_001166627	Dynlt1f	0.313971	0.000574585	0.010598	0.00296089	0.974114	0.995097	-0.0135537	0.881945	0.999991	0.356638	9.17681e-05	0.000403653	315.264	358.761	315.784	302.28	398.842	1
231868	NM_172726	E130309D02Rik	0.510685	0.000151726	0.00340889	0.173514	0.198692	0.777159	0.0861891	0.523521	0.999991	-0.103872	0.442373	0.586072	22.977	30.059	26.043	23.759	21.129	1
13555	NM_007891	E2f1	0.360255	0.00245586	0.0334735	-0.00929627	0.937837	0.992479	0.0648615	0.586342	0.999991	-0.134058	0.261235	0.398616	20.922	24.62	20.852	21.2	18.833	1
242705	NM_177733	E2f2	-0.667389	7.95094e-05	0.0019901	0.869017	2.5855e-07	2.94369e-05	0.175596	0.298386	0.999991	-1.72129	3.97496e-24	1.28835e-22	21.077	12.032	39.197	23.298	6.176	1
626058	NR_033736	E330020D12Rik	2.98957	2.08551e-22	6.71935e-20	0.412211	0.215712	0.790756	0.180196	0.595508	0.999991	5.79954	3.74899e-82	1.34719e-79	0.128	1.189	0.183	0.144	9.804	1
50498	NM_015766	Ebi3	1.42165	8.47791e-10	6.61758e-08	-0.521938	0.0261886	0.310402	0.366163	0.116027	0.999991	2.46495	1.50544e-26	5.63009e-25	8.496	21.641	5.825	10.703	49.594	1
68177	NM_026598	Ebpl	0.708415	0.00763612	0.0795827	0.375167	0.158946	0.736158	0.310848	0.243825	0.999991	1.10699	2.92098e-05	0.000143403	2.306	3.543	3.039	2.834	5.126	1
192193	NM_138677	Edem1	-0.551944	0.000502088	0.00948019	-0.346785	0.028772	0.327212	-0.0502091	0.751522	0.999991	-0.433645	0.00625613	0.0172471	61.057	37.845	48.073	57.333	44.359	1
66143	NM_025380	Eef1e1	0.437167	0.00154789	0.023605	0.14898	0.281636	0.850598	0.127689	0.35647	0.999991	-0.594374	2.01631e-05	0.000102965	31.575	39.224	35.174	33.598	20.54	1
67160	NM_026007	Eef1g	0.445299	0.001296	0.0204005	-0.0236657	0.864271	0.982058	0.099491	0.472357	0.999991	0.00753425	0.9566	0.977396	562.363	702.439	553.018	587.686	558.432	1
13655	NM_001289925	Egr3	1.36261	8.52792e-05	0.00209981	-0.0256191	0.942647	0.993769	0.537471	0.126604	0.999991	3.59856	6.99916e-26	2.54277e-24	0.235	0.628	0.234	0.349	3.605	1
114601	NM_001114597	Ehbp1l1	0.643937	0.00467379	0.0551638	0.495768	0.0294756	0.330763	0.178441	0.433782	0.999991	2.85635	2.77099e-36	1.69646e-34	6.053	8.789	8.688	6.425	45.935	1
13661	NM_007914	Ehf	2.33411	8.22464e-06	0.000276155	-0.0175087	0.975223	0.995097	0.321415	0.564237	0.999991	3.99541	7.08686e-15	1.1821e-13	0.004	0.089	0.003	0.009	0.371	1
13666	NM_010121	Eif2ak3	-0.722264	5.72287e-05	0.00149416	-0.175464	0.327616	0.876429	0.282225	0.115102	0.999991	-1.0678	2.82725e-09	2.7187e-08	18.764	10.275	16.701	22.302	8.7	1
192170	NM_138669	Eif4a3	0.326446	0.000230447	0.00491352	0.159051	0.0729244	0.538699	0.152168	0.086322	0.999991	-0.248556	0.00516203	0.0145885	103.818	119.165	116.129	112.116	86.255	1
276770	NM_001166589	Eif5a	0.377817	0.00164756	0.0246639	0.0779464	0.51617	0.929196	0.0574077	0.632531	0.999991	-0.773439	1.19634e-10	1.33528e-09	804.383	953.899	852.892	814.708	464.641	1
208691	NM_177586	Eif5a2	0.665706	0.00417442	0.0504495	0.514897	0.0270378	0.316144	0.380667	0.10326	0.999991	0.592788	0.0108543	0.0278172	0.805	1.191	1.176	1.033	1.224	1
72735	NR_110421	Eldr	-0.870592	0.00651221	0.0704892	0.15644	0.617743	0.947856	-0.0871442	0.782072	0.999991	-0.459315	0.147384	0.25423	1.544	0.729	1.719	1.33	1.085	1
54325	NM_019422	Elovl1	0.511589	0.000943794	0.0158799	-0.0617154	0.690773	0.956445	-0.450228	0.0038165	0.639025	0.79766	2.4606e-07	1.82721e-06	21.112	27.673	20.291	14.919	36.615	1
170439	NM_130450	Elovl6	-0.548155	0.00865344	0.0864373	-0.400142	0.0552012	0.469225	-0.156884	0.452036	0.999991	-1.11742	9.25282e-08	7.32164e-07	9.703	5.991	7.351	8.427	4.315	1
68032	NM_026519	Emc4	0.321471	0.0055624	0.0625791	0.187968	0.105528	0.626364	0.117547	0.312304	0.999991	0.121511	0.295951	0.438712	29.471	33.747	33.641	31.058	31.714	1
18117	NM_010926	Emc8	0.262496	0.00808138	0.0825195	0.0337891	0.733767	0.967154	0.173814	0.0799602	0.999991	0.065797	0.507745	0.646911	9.444	10.37	9.689	10.329	9.768	1
246707	NM_145158	Emilin2	1.05708	0.00326503	0.0414785	-1.23081	0.000621907	0.0209063	-0.685049	0.0567561	0.999991	0.426482	0.235368	0.368851	20.767	42.446	8.112	11.978	28.425	1
225898	NM_144872	Eml3	0.824992	9.40669e-12	9.5601e-10	0.26233	0.0307285	0.340173	0.0134987	0.911681	0.999991	2.42515	4.99487e-90	2.11706e-87	14.496	23.626	17.481	14.18	78.19	0
13805	NM_001146350	Eng	-0.586436	0.00864448	0.0864087	0.2732	0.219938	0.794856	-0.427068	0.0557596	0.999991	-0.885046	7.6012e-05	0.000340693	9.792	5.87	11.903	7.065	5.11	1
13808	NM_007933	Eno3	0.724409	2.99782e-05	0.000852702	0.660622	0.000144412	0.00638111	-0.0288538	0.871113	0.999991	3.37443	6.16381e-89	2.48507e-86	2.921	4.466	4.672	2.78	31.565	0
67870	NM_026421	Enoph1	0.558344	3.71994e-05	0.00101865	0.0182636	0.893424	0.986107	0.15733	0.247987	0.999991	0.0234987	0.863186	0.914704	10.098	13.521	10.106	11.106	9.99	1
12495	NM_009848	Entpd1	2.67448	6.03386e-17	1.10085e-14	-0.27592	0.412016	0.905851	0.51085	0.12062	0.999991	5.36864	3.94161e-64	7.66528e-62	0.229	1.602	0.182	0.329	12.599	1
12499	NM_001026214	Entpd5	-0.462954	0.00886774	0.0881709	-0.481451	0.00649684	0.121225	0.083872	0.635184	0.999991	-1.67215	4.37578e-21	1.15362e-19	28.103	18.502	20.111	29.075	8.465	1
93685	NM_053103	Entpd7	0.71883	0.00574206	0.0641239	-0.211824	0.417075	0.907426	-0.0865719	0.740089	0.999991	0.210141	0.420082	0.565192	2.882	4.443	2.483	2.611	3.309	1
17075	NM_008532	Epcam	-1.25006	4.11484e-06	0.000148007	-1.08269	6.56887e-05	0.00337044	0.132941	0.623082	0.999991	-1.8859	4.36802e-12	5.5885e-11	17.764	6.513	8.058	19.074	4.39	1
13844	NM_001290753	Ephb2	0.608494	0.00426641	0.0513004	-0.481731	0.0239148	0.295854	-0.0641511	0.763439	0.999991	-1.46775	6.95875e-12	8.70766e-11	6.019	8.497	4.289	5.616	2.079	1
384214	NM_001001804	Ephx4	-1.05461	0.00904845	0.0892643	0.771855	0.0429107	0.409621	0.119107	0.758545	0.999991	-1.97445	4.0004e-06	2.38466e-05	0.623	0.233	1.138	0.669	0.098	1
71991	NM_028042	Ercc8	0.361775	0.00291923	0.0380103	0.0722078	0.556442	0.93664	0.150194	0.221077	0.999991	-0.445385	0.000397992	0.0015169	4.217	4.974	4.453	4.55	3.046	0
67458	NM_026170	Ergic1	0.53033	6.76032e-05	0.00172633	-0.409185	0.0021521	0.0532832	0.0138659	0.917115	0.999991	0.204897	0.12391	0.221044	51.026	67.661	38.515	50.134	58.15	1
13877	NM_007951	Erh	0.381871	0.00133248	0.0208256	0.0961055	0.419607	0.907426	0.0648538	0.586087	0.999991	-0.608525	3.40695e-07	2.45711e-06	189.498	226.252	202.313	192.585	122.193	0
226144	NM_001164359	Erlin1	0.946496	7.25614e-10	5.7229e-08	-0.161491	0.297819	0.860755	0.15824	0.306307	0.999991	1.24227	5.63451e-16	1.03372e-14	6.185	11.084	5.549	6.705	14.744	1
67397	NM_026129	Erp29	0.916752	5.57361e-09	3.71811e-07	0.00896021	0.954685	0.995097	-0.00154195	0.9922	0.999991	1.86282	1.88339e-32	9.29324e-31	42.59	74.275	42.802	41.415	156.401	1
26379	NM_007953	Esrra	0.50317	0.000571411	0.010591	0.0871779	0.551839	0.93664	0.0493776	0.736354	0.999991	0.856376	4.25514e-09	4.0124e-08	11.899	15.505	12.67	11.95	21.476	1
110826	NM_026695	Etfb	0.500926	0.00410813	0.0498108	0.151424	0.386026	0.900177	-0.0151718	0.930832	0.999991	0.202313	0.246771	0.382119	69.205	90.179	76.811	66.671	78.955	1
23872	NM_011809	Ets2	-0.910608	1.12582e-05	0.000365844	0.727646	0.000426246	0.0156437	0.420906	0.0416639	0.999991	-2.11593	4.32022e-24	1.39207e-22	14.726	7.02	24.908	19.396	3.198	1
14017	NM_001033711	Evi2a	0.860525	4.04186e-05	0.00109612	-1.39854	5.37865e-11	1.52539e-08	-0.0929162	0.659084	0.999991	3.09499	1.13247e-49	1.37645e-47	12.217	20.446	4.507	11.013	108.712	1
73172	NM_028457	Exo5	0.575499	7.25722e-08	3.95995e-06	-0.0368071	0.733561	0.967086	0.165635	0.12448	0.999991	0.0236329	0.826861	0.893218	10.175	13.914	9.922	11.097	10.185	1
66583	NM_025644	Exosc1	0.342542	0.004092	0.0496914	0.22569	0.0589759	0.483792	0.177142	0.139042	0.999991	-0.348923	0.00388621	0.0113818	12.962	15.054	15.198	14.22	10.025	1
27998	NR_104358	Exosc5	0.502829	0.00170369	0.0252049	0.190001	0.236337	0.813944	0.0127817	0.936577	0.999991	0.736464	4.25938e-06	2.52357e-05	41.137	53.634	46.916	40.307	68.245	1
14049	NM_010165	Eya2	-0.692197	0.00367604	0.0457406	0.38082	0.108647	0.632218	0.0524124	0.825443	0.999991	-1.38637	7.04012e-09	6.47237e-08	10.641	5.89	14.051	10.68	3.842	1
16456	NM_172647	F11r	1.20255	0.00320716	0.0409149	0.341086	0.418299	0.907426	0.482843	0.250336	0.999991	3.03727	1.48797e-14	2.42327e-13	0.09	0.239	0.126	0.136	1.076	1
14064	NM_010170	F2rl2	0.849284	0.00383099	0.0472032	-0.217258	0.468125	0.918586	-0.0384321	0.897612	0.999991	1.6752	8.98699e-09	8.11332e-08	0.848	1.463	0.723	0.788	2.895	1
100038363	NR_030718	F630028O10Rik	1.76356	0.000254858	0.00533054	-0.221059	0.678709	0.954969	-0.0654165	0.901901	0.999991	6.00792	1.32667e-39	9.57635e-38	0.011	0.098	0.005	0.008	2.787	1
12140	NM_021272	Fabp7	3.1954	2.54978e-09	1.75506e-07	0.112247	0.847037	0.979674	0.0262071	0.964269	0.999991	0.974712	0.0843474	0.160648	0.01	0.816	0.02	0.01	0.111	1
76566	NM_029658	Fam101b	1.99742	1.4958e-09	1.10039e-07	-0.306613	0.362423	0.893585	0.0186589	0.955638	0.999991	4.47135	4.84407e-42	4.14884e-40	0.694	2.888	0.551	0.682	19.65	1
223433	NM_001242423	Fam105a	0.726461	0.000731242	0.013012	-0.376192	0.0817532	0.566498	0.00922777	0.965884	0.999991	2.48143	5.75047e-31	2.62584e-29	7.085	10.896	5.408	6.885	41.32	1
63913	NM_022018	Fam129a	-0.939289	0.0070102	0.0742866	-0.411602	0.237046	0.814954	0.243674	0.483694	0.999991	0.119972	0.73024	0.826805	9.475	4.215	7.022	11.148	10.233	1
66488	NM_025591	Fam136a	0.382983	0.00158052	0.0239751	-0.0345192	0.776768	0.976397	0.137929	0.256699	0.999991	-0.704626	1.02333e-08	9.1485e-08	19.007	22.709	18.597	20.381	11.436	0
74349	NM_001242364	Fam160a2	-1.03722	0.000271307	0.00560361	-0.681198	0.0165338	0.235519	0.03618	0.898396	0.999991	-1.22534	1.75182e-05	9.04358e-05	1.397	0.595	0.852	1.389	0.561	1
109359	NM_198017	Fam175b	0.398499	0.0041117	0.0498108	-0.129956	0.351487	0.889087	0.057388	0.680424	0.999991	0.646057	3.18426e-06	1.93585e-05	10.338	12.503	9.491	10.435	16.063	1
68241	NM_026633	Fam195a	0.545582	0.00954257	0.0929281	0.443185	0.0355064	0.368482	0.145352	0.493022	0.999991	-0.749911	0.000528961	0.00195742	6.95	9.405	9.546	7.491	4.01	0
235493	NM_001113283	Fam214a	-0.608182	0.000122499	0.00285386	0.108942	0.486552	0.9221	0.177004	0.258284	0.999991	-0.205775	0.190829	0.312506	3.638	2.164	3.95	3.99	3.108	1
71532	NM_001081289	Fam217b	1.53254	0.000114113	0.00269161	-0.2995	0.482854	0.920953	0.499852	0.224335	0.999991	2.7745	1.0584e-12	1.43404e-11	0.116	0.387	0.088	0.176	1.089	1
215900	NM_175449	Fam26f	0.928133	4.25631e-06	0.000152372	-1.60345	1.50748e-12	6.53159e-10	-0.232194	0.267188	0.999991	-0.242667	0.245547	0.380733	3.001	5.34	0.924	2.445	2.487	1
76820	NM_029758	Fam49a	1.20801	1.28345e-06	5.2528e-05	-0.280662	0.270608	0.84043	-1.00633	0.000112653	0.0563532	4.32669	8.47467e-69	2.00123e-66	0.781	1.706	0.632	0.359	17.532	1
223601	NM_144846	Fam49b	0.547278	0.00022978	0.0049077	-0.320473	0.0313222	0.341653	-0.0482184	0.745852	0.999991	0.876608	3.56515e-09	3.39274e-08	25.746	34.552	20.583	24.266	47.059	1
56279	NM_019833	Fam69b	0.621889	0.000262914	0.00547636	-0.155749	0.36562	0.893836	0.327288	0.0557976	0.999991	-0.909053	2.08295e-07	1.56292e-06	7.001	9.95	6.283	8.534	3.636	1
241303	NM_175511	Fam78a	-0.619368	1.05241e-06	4.37593e-05	0.23808	0.0597801	0.487173	0.0904075	0.475007	0.999991	-1.57193	8.52076e-35	4.77452e-33	25.51	15.099	30.24	26.371	8.37	1
213956	NM_145986	Fam83f	-1.00362	0.00546547	0.0618317	-0.106231	0.759537	0.971704	0.163747	0.634861	0.999991	-0.716086	0.0444781	0.0936709	0.32	0.13	0.295	0.346	0.179	1
68523	NM_026753	Fam96b	0.374097	0.00186865	0.0270009	0.299354	0.0129102	0.19938	0.118624	0.326465	0.999991	0.326384	0.00671286	0.0183502	29.903	35.534	36.843	31.489	37.072	1
73833	NM_001146023	Fam98c	0.445876	0.00648775	0.0703583	-0.147058	0.371221	0.8955	-0.0875764	0.594413	0.999991	0.902428	3.37951e-08	2.84292e-07	20.047	25.126	18.046	18.214	37.492	1
14102	NM_007987	Fas	-1.11646	0.000189108	0.00414424	0.457733	0.111117	0.639347	-0.10407	0.720323	0.999991	-0.181118	0.533519	0.66979	1.713	0.672	2.407	1.543	1.482	1
14121	NM_019395	Fbp1	1.66407	0.000265496	0.00552206	-0.0203755	0.964504	0.995097	0.682995	0.135093	0.999991	-1.169	0.0111536	0.028518	2.332	8.441	2.301	4.086	0.829	1
14120	NM_007994	Fbp2	2.72653	1.97574e-06	7.65182e-05	-0.0119941	0.984037	0.995097	0.0246609	0.967204	0.999991	2.17073	0.000167896	0.000695396	0	0.362	0	0	0.237	1
30843	NM_001002846	Fbxl12	-0.65966	5.57559e-14	7.6064e-12	0.181088	0.0368601	0.378004	0.0836713	0.335702	0.999991	-1.4581	9.84892e-60	1.61191e-57	33.037	18.661	37.661	33.63	10.879	1
269529	NM_001024142	Fbxo10	0.854461	0.00128855	0.0203043	0.264606	0.321356	0.872945	0.214194	0.422736	0.999991	0.475587	0.0741662	0.143977	1.067	1.822	1.303	1.219	1.495	1
67731	NM_026346	Fbxo32	-0.870477	5.89783e-05	0.00153455	0.339881	0.105907	0.627638	0.24703	0.241294	0.999991	0.246932	0.241088	0.375408	0.745	0.363	0.957	0.866	0.88	1
14127	NM_010185	Fcer1g	1.38926	2.48186e-06	9.30269e-05	0.603698	0.0411866	0.400766	0.119316	0.687361	0.999991	3.26437	1.35756e-28	5.69554e-27	11.724	30.012	18.414	12.334	128.673	1
215384	NM_001122603	Fcgbp	1.50426	0.00652406	0.0705167	0.386432	0.494049	0.923254	0.491576	0.38392	0.999991	0.659957	0.240162	0.374446	0.007	0.039	0.012	0.014	0.017	0
14130	NM_001077189	Fcgr2b	2.26174	4.98678e-12	5.28076e-10	-1.3195	7.79983e-05	0.00386783	-1.13451	0.000668989	0.218811	0.926456	0.00479266	0.0136591	3.969	19.546	1.453	1.563	7.643	1
14132	NM_010189	Fcgrt	1.2949	0.00023174	0.0049287	0.696728	0.0484226	0.436106	-0.231605	0.516227	0.999991	2.816	8.69341e-16	1.56709e-14	1.31	3.249	2.247	1.055	11.166	1
74015	NR_028267	Fcho1	-0.410258	0.00176533	0.0257537	0.0982308	0.453694	0.915636	0.10714	0.413834	0.999991	-1.35356	7.50707e-25	2.56388e-23	77.306	52.984	82.318	80.828	29.478	0
98752	NR_027666	Fcrla	2.96551	3.52579e-10	2.85514e-08	0.240918	0.644147	0.950527	0.0315336	0.952553	0.999991	2.53812	1.02383e-07	8.02079e-07	0.023	0.458	0.037	0.019	0.355	1
14159	NM_010194	Fes	2.17351	5.46779e-14	7.52716e-12	-0.26714	0.35786	0.891085	-0.138984	0.632311	0.999991	3.90294	1.27291e-41	1.07353e-39	4.746	21.546	3.919	4.142	82.674	1
233079	NM_146187	Ffar2	2.97103	4.80616e-17	8.98514e-15	-2.17321	2.16959e-09	4.17794e-07	-1.04682	0.00348829	0.606944	4.75699	3.38897e-41	2.70626e-39	3.274	28.688	0.57	1.369	117.922	1
26382	NM_013710	Fgd2	2.55803	1.99817e-16	3.47796e-14	-0.755611	0.0160162	0.230037	-2.61643	4.09689e-16	2.32266e-12	4.01388	3.98739e-38	2.65772e-36	4.052	24.847	2.303	0.521	78.542	1
14174	NM_008007	Fgf3	-1.22333	0.00297659	0.0385252	0.818504	0.0456524	0.421178	0.0477116	0.907391	0.999991	-3.95892	2.39213e-20	6.01856e-19	7.462	2.561	14.18	7.481	0.237	1
14179	NM_010205	Fgf8	-1.31625	0.00947588	0.092636	-0.216954	0.657151	0.95142	-0.775286	0.119694	0.999991	-2.51842	2.86922e-06	1.7566e-05	0.4	0.083	0.342	0.184	0	1
14181	NM_008009	Fgfbp1	2.41127	1.48081e-06	5.94801e-05	-0.568772	0.268821	0.840019	1.2796	0.0110648	0.999991	-1.53841	0.00350517	0.010406	0.374	2.817	0.21	1.181	0.051	1
14191	NM_010208	Fgr	2.21004	5.30877e-38	3.82813e-35	-0.379238	0.0324903	0.350062	0.332276	0.0574099	0.999991	4.50385	1.07991e-153	1.98343e-150	2.259	9.906	1.73	2.782	54.041	1
14194	NM_010209	Fh1	0.578481	2.83338e-07	1.37961e-05	0.0081802	0.942268	0.993769	0.0672927	0.551375	0.999991	0.576776	3.07921e-07	2.24227e-06	47.761	65.396	48.109	48.722	70.578	1
103199	NM_133999	Fig4	0.79449	3.50442e-06	0.00012726	-0.135168	0.431821	0.910092	-0.127145	0.459822	0.999991	0.516417	0.00259457	0.00800155	10.004	16.043	9.146	8.925	14.256	1
338355	NM_001045528	Fkbp15	0.568084	5.71186e-05	0.00149386	-0.280881	0.0474765	0.431298	-0.119131	0.400301	0.999991	1.3157	9.75504e-21	2.51954e-19	11.924	16.247	9.837	10.675	29.67	1
14228	NM_010219	Fkbp4	0.382958	0.00592209	0.0657947	0.0665159	0.632737	0.947856	0.0772914	0.578717	0.999991	-1.10379	2.44655e-15	4.25511e-14	127.429	152.407	133.635	131.143	58.068	1
286940	NM_001081427	Flnb	1.13662	0.000385474	0.007571	-1.0567	0.00097037	0.029333	-0.343782	0.283064	0.999991	1.74599	4.94782e-08	4.06296e-07	26.08	55.721	11.914	19.451	94.788	1
14251	NM_008027	Flot1	0.673789	0.000113863	0.00268991	-0.140452	0.422213	0.908119	0.064981	0.71027	0.999991	1.66359	1.40431e-21	3.83689e-20	29.505	43.448	26.743	29.925	94.615	1
71436	NM_001172160	Flrt3	1.80267	0.000813898	0.0141502	0.0552973	0.919673	0.989866	0.335378	0.539483	0.999991	3.16752	3.33293e-09	3.17907e-08	0.037	0.225	0.04	0.052	0.796	1
14254	NM_010228	Flt1	0.821779	0.00853909	0.0859739	-0.679995	0.0372885	0.380883	0.227761	0.472605	0.999991	1.30161	2.73037e-05	0.000135169	0.205	0.349	0.12	0.237	0.54	1
71409	NM_172409	Fmnl2	0.842258	0.00806288	0.0823861	0.0755277	0.812885	0.979392	0.0986885	0.757172	0.999991	1.45404	4.60661e-06	2.70698e-05	1.009	1.733	1.08	1.051	2.96	1
68655	NM_001081416	Fndc1	1.35444	0.00539783	0.0613658	2.78402	9.43118e-09	1.5818e-06	-0.294282	0.550741	0.999991	-0.12545	0.798736	0.874726	0.124	0.377	1.368	0.092	0.11	1
14275	NM_008034	Folr1	1.66744	0.00503855	0.0584696	0.226964	0.704368	0.959821	0.317789	0.595189	0.999991	1.30151	0.0287862	0.064678	0.059	0.508	0.1	0.112	0.376	0
382074	NM_001033469	Foxr1	2.13072	4.78973e-05	0.00127024	-0.34671	0.541753	0.934549	-0.180272	0.750072	0.999991	2.83899	4.33509e-08	3.59013e-07	0.019	0.226	0.005	0.009	0.441	1
235169	NM_001291448	Foxred1	0.523849	4.91955e-05	0.00130239	-0.228543	0.0785179	0.556692	0.0584296	0.652129	0.999991	0.237075	0.0668284	0.131823	14.311	18.895	12.223	14.473	16.689	0
209630	NM_001177844	Frmd4a	0.594086	0.00350612	0.0439332	-0.129744	0.524332	0.931004	0.3562	0.0801996	0.999991	0.122734	0.546774	0.68079	8.801	12.297	8.093	11.006	9.51	1
320365	NM_172887	Fry	1.15164	1.50258e-09	1.10039e-07	-0.575896	0.00355454	0.078619	0.197028	0.309135	0.999991	2.45293	1.2464e-38	8.44385e-37	0.502	1.042	0.333	0.562	2.834	1
14086	NM_007984	Fscn1	1.2078	0.00314503	0.040191	0.694021	0.0898356	0.587025	0.228348	0.577004	0.999991	2.88103	1.80213e-12	2.38887e-11	4.097	9.843	7.201	4.678	39.826	1
71665	NM_024243	Fuca1	0.683435	3.58947e-07	1.70393e-05	0.0225347	0.867342	0.982382	0.1509	0.263112	0.999991	1.18356	1.01148e-18	2.25334e-17	12.783	18.881	13.031	13.75	28.993	1
53618	NR_045554	Fut8	0.808892	0.00111347	0.0181499	-0.509328	0.0401773	0.395885	-0.121371	0.624819	0.999991	0.342978	0.166917	0.280571	71.032	116.201	49.308	63.242	89.638	1
108017	NM_033648	Fxyd4	3.23598	3.7406e-14	5.24481e-12	-0.272551	0.58552	0.940731	-0.320683	0.524684	0.999991	5.92499	1.95777e-45	2.02262e-43	0.099	2.056	0.056	0.042	16.256	1
93897	NM_175284	Fzd10	0.792139	0.00167208	0.0248482	-0.0891852	0.729761	0.965874	-0.0746281	0.772982	0.999991	-0.445686	0.0890772	0.168164	0.671	1.094	0.632	0.619	0.475	1
14368	NM_008056	Fzd6	1.15505	6.22731e-05	0.00161197	-0.354359	0.231654	0.807992	0.415071	0.154763	0.999991	0.802685	0.00560377	0.0156444	0.531	1.143	0.409	0.707	0.95	1
68401	NM_175935	G6pc3	0.469765	0.000499074	0.00944685	0.324381	0.0164918	0.235137	0.0706033	0.604101	0.999991	0.930175	4.03976e-12	5.20883e-11	8.183	10.408	10.303	8.35	15.544	1
13197	NM_007836	Gadd45a	0.512309	0.00136953	0.0212053	-0.267189	0.101384	0.616028	0.0390152	0.809695	0.999991	-0.689555	3.16528e-05	0.000154297	6.127	8.052	5.074	6.089	3.708	1
330217	NM_001033416	Gal3st4	0.844373	0.000574391	0.010598	-0.541295	0.0383267	0.384485	-0.156036	0.54278	0.999991	1.79536	7.6655e-14	1.15823e-12	0.442	0.751	0.294	0.379	1.616	0
238875	NM_177713	Gapt	2.71533	1.34521e-11	1.34904e-09	-1.47028	0.00087244	0.0271082	-1.30313	0.00301521	0.604546	5.51478	1.93953e-43	1.80115e-41	0.263	2.135	0.056	0.067	19.422	1
14460	NM_008089	Gata1	-0.885929	3.36358e-05	0.000938024	-1.98536	3.28144e-19	8.53065e-16	-0.435768	0.0397841	0.999991	-2.31511	1.06235e-24	3.56923e-23	4.489	2.175	1.068	3.204	0.824	1
230101	NM_172692	Gba2	0.382087	0.0004625	0.00889915	0.0701143	0.521807	0.929885	-0.0530725	0.628557	0.999991	0.551951	4.09648e-07	2.91372e-06	10.882	12.997	11.486	10.196	15.797	1
626578	NM_001039646	Gbp10	-1.49961	4.40372e-10	3.5471e-08	-0.81013	0.000739013	0.0238657	-0.00690637	0.97703	0.999991	-2.2405	1.40445e-20	3.59931e-19	29.048	9.009	16.252	27.872	5.648	1
634650	NM_001039647	Gbp11	-1.11373	0.00597776	0.0663645	-0.795629	0.0494498	0.439798	0.0354381	0.930216	0.999991	-1.09116	0.00707554	0.0192019	10.531	3.994	5.624	10.342	4.36	1
17472	NM_001256005	Gbp4	-0.979057	4.77002e-11	4.54292e-09	-0.702589	2.31413e-06	0.000206262	0.0914831	0.537948	0.999991	-0.885755	2.64583e-09	2.55315e-08	35.547	16.327	21.778	36.508	18.763	1
100702	NM_194336	Gbp6	-1.54718	5.58559e-24	2.11456e-21	-0.719434	2.51954e-06	0.000219552	0.0591508	0.698458	0.999991	-2.49541	4.43488e-59	7.11734e-57	41.957	12.914	25.396	42.259	7.111	1
76074	NM_029509	Gbp8	-1.07356	4.21088e-07	1.94086e-05	-0.6627	0.00177477	0.0463727	0.138735	0.512485	0.999991	-0.276018	0.192738	0.315129	40.376	17.159	25.146	42.791	32.639	1
236573	NM_172777	Gbp9	-0.712728	0.00135243	0.0210481	-1.17944	1.17419e-07	1.45358e-05	-0.520206	0.0193097	0.999991	-0.344062	0.121647	0.217716	23.006	12.636	9.907	15.253	17.699	1
103988	NM_010292	Gck	2.37768	1.52331e-09	1.10901e-07	-0.35278	0.408549	0.905679	-1.10718	0.0139362	0.999991	5.34602	2.68976e-43	2.4701e-41	0.095	0.717	0.077	0.029	7.487	1
14538	NM_133219	Gcnt2	2.88705	3.69995e-16	6.15696e-14	0.470122	0.195881	0.776009	-0.00725556	0.984288	0.999991	5.65764	5.54956e-58	8.65417e-56	0.196	1.708	0.291	0.188	14.666	1
233552	NM_201352	Gdpd5	0.945252	0.00350758	0.0439332	1.24607	0.000115647	0.00530547	0.13077	0.688622	0.999991	2.86401	5.26862e-19	1.20457e-17	0.798	1.491	2.067	0.856	6.761	1
328232	NM_001033399	Gfod1	0.825394	0.00238395	0.0328183	-0.368009	0.176448	0.754941	-0.22347	0.411653	0.999991	0.821909	0.00248818	0.00771952	4.826	8.061	3.716	3.951	8.693	1
110175	NM_026637	Ggct	1.14873	1.90312e-13	2.34406e-11	0.119346	0.461189	0.917352	0.131645	0.417614	0.999991	2.40499	9.17817e-56	1.34261e-53	2.732	5.636	2.977	2.915	14.698	1
16205	NM_008376	Gimap1	-0.507222	0.00102224	0.0169177	-0.261862	0.0896451	0.587025	-0.35521	0.0214026	0.999991	-0.866799	2.12221e-08	1.83091e-07	46.526	29.716	38.633	35.18	24.897	1
107526	NM_174990	Gimap4	-0.874292	0.00614114	0.0676675	0.350104	0.270837	0.84043	-0.422495	0.184831	0.999991	-1.14564	0.000336355	0.0013073	9.609	4.565	12.402	6.74	3.987	1
317757	NM_175035	Gimap5	-0.599458	0.000536255	0.0100377	-0.310609	0.0716709	0.53336	-0.0868025	0.614046	0.999991	0.0541343	0.752641	0.843503	8.369	5.003	6.723	7.583	8.563	1
231931	NM_153175	Gimap6	-0.787786	3.98038e-06	0.000143512	0.25928	0.126763	0.674625	-0.223446	0.189337	0.999991	-0.62044	0.000276454	0.00109535	23.767	12.447	28.471	19.614	15.075	1
243374	NM_001077410	Gimap8	-1.08208	6.15423e-05	0.00159578	0.211282	0.431355	0.910092	-0.135355	0.614668	0.999991	-0.552006	0.0403783	0.0862454	5.281	2.188	6.154	4.566	3.465	0
317758	NM_174960	Gimap9	-0.494079	6.90487e-06	0.000236028	0.109774	0.314673	0.872115	0.141269	0.195844	0.999991	-1.29315	3.964e-31	1.82014e-29	34.762	22.487	37.511	37.23	13.829	1
14933	NM_212444	Gk	1.03765	2.51241e-05	0.000728839	0.14241	0.564781	0.937022	-0.119281	0.630474	0.999991	0.0382122	0.877333	0.923454	2.341	4.554	2.614	2.118	2.396	1
73690	NM_028608	Glipr1	0.670792	0.000105294	0.00251097	-0.0885988	0.609876	0.946129	-0.267247	0.124446	0.999991	1.88283	9.31333e-28	3.77327e-26	25.381	37.264	23.909	20.336	94.797	1
73046	NM_028419	Glrx5	0.445957	0.0072037	0.0757539	0.192363	0.246718	0.822937	0.00631604	0.969686	0.999991	-0.0383961	0.817299	0.88712	54.816	68.62	62.814	53.677	52.731	1
216456	NM_001033264	Gls2	0.843615	0.00353535	0.0442444	0.143377	0.626431	0.947856	-0.0693694	0.815615	0.999991	-0.577548	0.057069	0.115324	0.549	0.944	0.614	0.506	0.35	1
14661	NM_008133	Glud1	0.738761	1.11443e-05	0.000363704	-0.0442437	0.792634	0.978499	0.071205	0.672208	0.999991	1.01375	1.63567e-09	1.61226e-08	38.36	59.062	37.434	39.305	77.617	1
791347	NR_040449	Gm10007	-1.17034	0.00164828	0.0246639	0.199313	0.586517	0.940731	0.18728	0.609516	0.999991	-3.95725	1.65579e-21	4.50169e-20	8.322	3.057	9.829	9.393	0.221	1
100038468	NR_033547	Gm10684	1.60867	6.74798e-05	0.00172609	-0.677789	0.113204	0.644199	0.0541544	0.896751	0.999991	3.21228	8.21649e-16	1.48436e-14	0.214	0.731	0.114	0.216	2.735	0
622459	NR_033332	Gm12216	-0.845327	0.00133718	0.0208752	-0.104807	0.682529	0.955565	0.0241382	0.924821	0.999991	0.041973	0.869435	0.918558	2.127	1.039	1.967	2.049	2.163	1
100042926	NR_045895	Gm13546	1.22652	0.00233879	0.0323437	-0.842002	0.0701621	0.52767	0.529561	0.207207	0.999991	3.92149	4.65947e-25	1.61132e-23	0.204	0.55	0.056	0.338	4.328	1
672763	NR_046046	Gm13710	1.47807	0.00728576	0.0764576	0.691693	0.220829	0.795752	0.148166	0.797588	0.999991	3.06327	9.52573e-09	8.55763e-08	0.009	0.176	0.074	0.019	0.783	1
381417	NM_001085518	Gm14085	-0.905611	0.00585674	0.0652122	0.339591	0.299414	0.862092	-0.589599	0.0724778	0.999991	-1.41107	1.86854e-05	9.5982e-05	3.737	1.732	4.835	2.292	1.267	1
100038909	NM_001166672	Gm14548	4.74798	2.77441e-53	4.20129e-50	-0.208438	0.575582	0.937753	-0.334126	0.378757	0.999991	7.86308	5.34889e-145	5.52607e-142	0.098	3.602	0.079	0.065	36.217	0
100503307	NR_040429	Gm15408	-1.29159	0.000330595	0.00663952	0.0040193	0.990843	0.996145	0.183148	0.600497	0.999991	-1.73331	2.12861e-06	1.34144e-05	1.669	0.555	1.681	1.833	0.415	1
327812	NR_038032	Gm15663	1.10816	0.00667587	0.0717478	-0.866814	0.0349423	0.364926	0.0384177	0.925265	0.999991	-1.29045	0.00174413	0.00562546	1.894	4.143	0.955	1.886	0.652	1
100502764	NR_045728	Gm16617	1.07901	0.000187454	0.00411991	-0.637352	0.0417763	0.403984	-0.143821	0.636876	0.999991	2.23634	2.44804e-15	4.25511e-14	1.182	2.442	0.717	1.014	6.157	1
100504333	NR_108021	Gm16712	1.25331	7.75079e-07	3.31554e-05	-0.145511	0.572543	0.937661	0.390351	0.127305	0.999991	2.18814	4.34778e-18	9.22578e-17	2.034	4.641	1.822	2.616	9.869	0
320400	NR_033564	Gm16897	1.55812	0.00110958	0.018106	-1.94724	5.30494e-05	0.0028145	-0.267732	0.576087	0.999991	1.46499	0.00216937	0.00683172	2.293	7.75	0.388	1.787	7.769	1
14667	NM_010299	Gm2a	1.60222	2.04426e-17	4.24058e-15	-0.72998	0.000113282	0.0052123	-0.146392	0.438479	0.999991	3.56362	1.28747e-79	4.01544e-77	28.35	80.786	16.941	24.883	351.122	1
100042856	NM_001243039	Gm4070	-1.27434	5.83566e-07	2.59148e-05	-1.04333	4.288e-05	0.00239967	-0.574236	0.0243049	0.999991	0.0468548	0.854158	0.909568	29.79	10.794	14.098	18.92	30.329	1
241041	NR_002858	Gm4956	2.33415	6.01614e-07	2.65605e-05	-0.335335	0.491269	0.922134	-0.0441901	0.927284	0.999991	5.27919	5.59574e-30	2.4666e-28	0.223	1.682	0.153	0.201	18.766	0
330305	NM_183309	Gm5111	-0.945852	0.00142301	0.0218325	-1.07367	0.000304585	0.011967	-0.193859	0.508611	0.999991	-3.47135	1.94299e-25	6.87744e-24	5.006	2.269	2.249	4.19	0.317	1
230909	NM_001085505	Gm572	-1.35003	0.00201419	0.0286932	0.00289932	0.994136	0.997654	0.303032	0.436539	0.999991	0.405951	0.293715	0.43618	0.241	0.056	0.244	0.302	0.333	1
623849	NR_003596	Gm6455	2.03648	3.33971e-05	0.000933085	0.833538	0.0929615	0.594512	-0.13689	0.786432	0.999991	1.09066	0.027508	0.0621779	0.267	1.541	0.598	0.223	0.735	1
623898	NM_001037919	Gm6460	1.8396	9.68915e-05	0.00234008	0.582281	0.224849	0.800227	-0.0978371	0.84114	0.999991	0.918669	0.0542188	0.110578	0.35	1.627	0.607	0.301	0.805	1
664849	NR_003376	Gm7367	-0.371867	0.00784201	0.081059	0.2271	0.103914	0.622057	0.0770752	0.581199	0.999991	-0.776573	2.95855e-08	2.51568e-07	86.866	61.104	101.873	89.231	49.744	1
668108	NR_030719	Gm8979	-1.1527	0.00897172	0.0888059	-0.743424	0.0916001	0.590605	-0.649103	0.140739	0.999991	0.208512	0.635598	0.756773	3.356	1.189	1.815	1.886	3.918	0
668128	NR_030720	Gm8989	-1.16165	0.00768742	0.0798874	-0.748328	0.0857919	0.576238	-0.65335	0.133612	0.999991	0.209593	0.630117	0.752263	10.758	3.813	5.819	6.044	12.56	1
381353	NM_001005424	Gm996	1.00043	0.00566835	0.0635663	0.543924	0.136556	0.695397	0.0207805	0.95546	0.999991	2.82562	1.5055e-15	2.67016e-14	0.137	0.279	0.214	0.136	1.204	1
78816	NM_198101	Gmip	0.809606	1.0118e-06	4.22087e-05	-0.0571795	0.730258	0.965874	-0.0916736	0.580515	0.999991	1.42905	5.83598e-18	1.22734e-16	20.699	33.56	19.962	18.738	56.071	1
331026	NM_177910	Gmppb	0.390817	0.00296464	0.0384034	-0.0335382	0.79988	0.979392	0.0535768	0.68543	0.999991	0.394665	0.00270154	0.00827667	10.838	13.04	10.594	10.876	14.114	1
14700	NM_025277	Gng10	0.75262	8.55503e-08	4.5139e-06	0.268852	0.0565844	0.475268	0.0401665	0.776364	0.999991	1.68911	1.59508e-33	8.34387e-32	23.72	36.799	28.674	23.754	76.684	1
14701	NM_001177560	Gng12	0.807293	0.00143013	0.0219196	-1.1887	3.04308e-06	0.000256572	-0.111243	0.661004	0.999991	0.224157	0.376464	0.524656	7.081	11.612	2.994	6.353	8.222	1
14702	NM_001285909	Gng2	0.764471	0.0053493	0.0612279	-1.289	2.83923e-06	0.000240686	-0.699528	0.01096	0.999991	1.18796	1.49715e-05	7.84899e-05	13.857	22.086	5.398	8.016	32.559	1
26384	NM_011937	Gnpda1	0.359404	0.00673687	0.0721029	-0.0742515	0.577888	0.9395	0.0861165	0.518107	0.999991	0.66318	5.31183e-07	3.69184e-06	8.536	10.036	8.126	8.832	13.43	1
75612	NM_029364	Gns	0.629505	0.000271614	0.00560361	0.058077	0.737504	0.969019	0.0837583	0.628913	0.999991	2.00144	3.73335e-31	1.71901e-29	8.835	12.605	9.271	9.087	36.036	1
14718	NM_010324	Got1	0.620482	0.00266796	0.0356341	0.0849368	0.681503	0.955565	0.219063	0.289706	0.999991	0.0279624	0.892559	0.932853	12.833	18.271	13.702	14.634	12.976	1
333433	NM_175380	Gpd1l	0.587381	0.000828218	0.0142911	-0.0193038	0.912653	0.989044	0.151116	0.390354	0.999991	1.47849	3.54916e-17	7.13719e-16	11.406	15.796	11.325	12.392	32.038	1
74254	NM_133756	Gpn1	0.334678	0.00127936	0.0202236	0.00577178	0.956001	0.995097	0.0723518	0.489226	0.999991	0.164443	0.114932	0.208017	11.757	13.591	11.832	11.967	13.027	0
100210	NM_133884	Gpn2	0.549675	2.82527e-05	0.000807227	0.0934044	0.479794	0.920652	0.0419863	0.751295	0.999991	0.0129696	0.921987	0.953151	11.898	16.01	12.729	11.944	11.878	1
83924	NM_031999	Gpr137b	0.789188	0.000311769	0.00633708	-0.739834	0.00116449	0.0339508	-0.192405	0.390463	0.999991	2.33386	2.75641e-27	1.07715e-25	1.237	2.001	0.727	1.034	6.532	1
664862	NR_003568	Gpr137b-ps	0.748604	0.0046036	0.0544627	-0.77316	0.00520412	0.104337	-0.195818	0.470189	0.999991	1.95755	5.40361e-14	8.29357e-13	0.693	1.102	0.391	0.575	2.867	1
71862	NM_001286994	Gpr160	0.709624	0.000716252	0.0128206	-0.883049	4.4083e-05	0.00242158	-0.124544	0.557935	0.999991	-0.0984755	0.642714	0.762402	3.189	4.858	1.74	2.831	2.855	1
110168	NM_182806	Gpr18	-0.799746	0.00434675	0.0519517	-0.698526	0.0126774	0.196954	-0.200735	0.472642	0.999991	0.500275	0.0725899	0.141466	9.86	4.997	5.913	8.207	14.048	1
321019	NM_183031	Gpr183	1.5264	3.02679e-12	3.27391e-10	-0.490484	0.0276119	0.31881	0.270011	0.221227	0.999991	2.91187	1.08069e-40	8.34754e-39	2.829	7.741	1.995	3.359	22.51	1
64095	NM_001104529	Gpr35	3.09397	8.12115e-19	1.98353e-16	0.442658	0.271307	0.84043	0.580413	0.146615	0.999991	7.6815	6.47641e-115	3.965e-112	0.023	0.327	0.04	0.044	9.432	1
227326	NM_001033290	Gpr55	1.65908	1.79757e-13	2.25667e-11	-1.42952	1.29269e-08	2.01633e-06	-0.641879	0.00757094	0.953826	3.61475	2.41244e-59	3.90957e-57	0.974	2.956	0.334	0.587	12.898	1
209318	NM_001177874	Gps1	0.327889	0.000832571	0.0142943	0.0613976	0.532317	0.932366	0.0940449	0.338967	0.999991	0.0501945	0.609795	0.735249	34.5	39.658	36.11	35.64	35.308	0
14775	NM_008160	Gpx1	1.53264	3.27209e-19	8.2582e-17	-0.639037	0.000191568	0.0080541	-0.505231	0.00318663	0.604546	1.57228	3.89506e-20	9.63851e-19	190.275	513.691	120.753	129.135	569.797	1
107022	NM_026240	Gramd3	1.22543	8.86902e-08	4.66332e-06	0.160054	0.494982	0.923254	-0.556056	0.0214461	0.999991	1.82081	1.19619e-15	2.13993e-14	0.949	2.111	1.063	0.607	3.486	1
56149	NM_019518	Grasp	-0.637264	0.000496802	0.00942741	1.48413	7.19543e-17	9.35286e-14	0.940892	1.40006e-07	0.000238122	0.498424	0.0054768	0.0153547	4.616	2.679	13.257	8.717	6.495	0
14784	NM_008163	Grb2	0.466285	0.00121536	0.0195581	-0.35341	0.0143066	0.212731	-0.0546248	0.704883	0.999991	0.61067	2.26018e-05	0.000113697	69.111	87.601	54.085	64.702	104.69	1
14786	NM_010346	Grb7	-0.602172	0.000210835	0.00454149	1.90558	7.48416e-42	5.83689e-38	0.345071	0.0221727	0.999991	-0.770464	3.45265e-06	2.08674e-05	1.159	0.688	4.452	1.429	0.656	1
53623	NR_104053	Gria3	1.14529	0.000396311	0.00773369	-0.809594	0.0123969	0.19532	-0.226056	0.484785	0.999991	1.62457	5.01726e-07	3.51421e-06	11.891	26.641	6.004	9.403	40.7	1
77998	NM_030022	Grifin	1.67735	2.92674e-07	1.4205e-05	-0.235142	0.485925	0.9221	0.255912	0.443525	0.999991	1.61391	8.20696e-07	5.54851e-06	2.49	8.148	2.072	2.967	8.417	1
14809	NM_008168	Grik5	0.577595	0.00450929	0.0535562	0.307979	0.130645	0.6804	0.0875241	0.668272	0.999991	0.870436	1.81384e-05	9.33751e-05	3.249	4.498	4.06	3.341	5.999	1
268934	NM_001291045	Grm4	1.45101	1.65446e-06	6.59302e-05	0.0531891	0.862694	0.9816	0.147554	0.631257	0.999991	1.24927	3.81263e-05	0.000182147	0.599	1.617	0.623	0.659	1.504	1
101612	NM_153419	Grwd1	0.405908	0.00848482	0.0856	0.0873409	0.571772	0.937661	0.117815	0.445732	0.999991	-0.814645	1.64643e-07	1.24957e-06	18.781	22.851	20.009	19.864	10.448	0
227753	NM_001206367	Gsn	1.49781	1.78753e-05	0.000544319	-0.0342913	0.921837	0.990275	-0.310936	0.373817	0.999991	4.04795	4.18695e-31	1.91718e-29	11.066	31.622	10.744	8.26	234.767	1
14873	NM_010362	Gsto1	0.880888	1.20377e-07	6.17921e-06	-0.12791	0.444216	0.91174	-0.0276085	0.868812	0.999991	1.55236	9.39445e-21	2.43021e-19	27.541	46.895	25.204	26.307	81.489	1
68705	NM_026816	Gtf2f2	0.332343	0.00567746	0.0635663	0.0849298	0.480878	0.920652	0.129056	0.284273	0.999991	-0.272902	0.0242424	0.0556026	19.733	22.759	20.957	21.018	16.094	1
56055	NM_019581	Gtpbp2	-0.461697	0.00454126	0.0538937	-0.134075	0.409563	0.905851	-0.0410367	0.80072	0.999991	-0.201177	0.216023	0.34505	39.468	26.083	36.016	36.937	33.792	1
69237	NM_027000	Gtpbp4	0.36508	0.00929642	0.0912351	-0.0937694	0.504718	0.926514	0.0327855	0.81554	0.999991	-0.188337	0.180495	0.298478	30.127	35.575	28.295	30.035	26.078	1
68778	NM_175133	Gucd1	0.323984	0.00529417	0.0606886	-0.367272	0.0018022	0.0467703	0.00945065	0.935584	0.999991	1.01314	1.51579e-18	3.33193e-17	7.362	8.446	5.708	7.178	14.77	1
60596	NM_021896	Gucy1a3	1.78239	2.58906e-11	2.49721e-09	-0.929076	0.000730412	0.0237367	-0.435114	0.110669	0.999991	3.40472	2.02577e-37	1.32881e-35	1.017	3.422	0.511	0.716	11.982	1
14917	NM_145067	Gucy2c	1.06454	0.0041087	0.0498108	-1.50326	0.000406815	0.0150012	-0.64314	0.108451	0.999991	3.89015	2.08622e-27	8.23037e-26	0.112	0.244	0.024	0.06	2.214	1
110006	NM_010368	Gusb	0.487306	0.000480795	0.00918556	-0.101191	0.469308	0.918592	-0.27736	0.0475586	0.999991	0.928555	2.76252e-11	3.29469e-10	30.003	38.623	28.055	24.073	56.932	1
74558	NM_029000	Gvin1	-1.27433	5.87599e-07	2.60176e-05	-1.04333	4.30765e-05	0.00239967	-0.574286	0.0243292	0.999991	0.0466833	0.854723	0.909877	29.786	10.795	14.094	18.919	30.321	1
27357	NM_013755	Gyg	0.684022	0.00175388	0.0256857	-0.371884	0.0892836	0.586871	-0.0693465	0.751276	0.999991	-0.132569	0.544573	0.679176	48.691	72.603	37.442	45.078	43.674	0
14960	NM_010378	H2-Aa	2.12556	0.000112217	0.0026593	0.760342	0.16786	0.746743	-0.0623542	0.91018	0.999991	6.61239	2.48055e-33	1.28538e-31	0.479	4.532	1.202	0.404	234.986	1
14961	NM_207105	H2-Ab1	1.80799	0.000356299	0.00708062	0.538678	0.288541	0.855476	0.214056	0.673596	0.999991	6.37989	1.64783e-36	1.02787e-34	0.955	4.899	1.629	1.106	237.472	1
14998	NM_010386	H2-DMa	1.13716	7.30707e-07	3.17052e-05	-0.483039	0.0375411	0.381624	-0.298843	0.197623	0.999991	3.995	1.85045e-68	4.24832e-66	6.147	12.774	4.317	4.769	107.508	1
14999	NM_010387	H2-DMb1	1.31525	4.27786e-05	0.00114452	-0.880814	0.00740741	0.133111	-0.0394393	0.903413	0.999991	4.04743	9.3546e-37	5.92458e-35	2.475	6.126	1.251	2.282	50.392	1
15000	NM_010388	H2-DMb2	1.32845	1.65395e-06	6.59302e-05	-1.30362	5.42617e-06	0.000401125	-0.121968	0.663917	0.999991	4.09641	5.88505e-50	7.20592e-48	5.982	14.566	2.244	5.193	118.49	1
14969	NM_010382	H2-Eb1	2.37428	8.14902e-07	3.47607e-05	0.615555	0.203243	0.781219	-0.0365519	0.940038	0.999991	6.89507	1.05172e-46	1.14374e-44	0.496	3.896	0.892	0.438	162.821	1
14991	NM_013819	H2-M3	-0.475854	0.00267294	0.0356341	-0.0850797	0.58814	0.940731	-0.0462807	0.768461	0.999991	0.465557	0.00280129	0.00853867	8.039	5.25	7.574	7.472	11.017	1
107766	NM_025325	Haao	0.664446	0.00438515	0.0523694	-1.799	5.17116e-14	3.22639e-11	-0.740278	0.00167166	0.458573	1.18192	3.85348e-07	2.75273e-06	11.623	17.139	3.142	6.555	26.856	1
66775	NM_025760	Hacd4	1.21362	0.0015034	0.0229728	-0.444334	0.261687	0.835709	-0.893677	0.0268639	0.999991	3.32219	1.28522e-18	2.8478e-17	0.37	0.89	0.256	0.162	4.815	1
68977	NM_001271434	Haghl	0.555413	0.00984826	0.0952586	0.2789	0.195424	0.776009	0.109798	0.610663	0.999991	0.416063	0.0533204	0.109128	14.695	20.64	18.545	15.604	20.118	1
15129	NM_001278161	Hbb-b1	2.35492	1.46747e-10	1.27712e-08	-1.00382	0.00639833	0.120387	-1.36875	0.000203107	0.0933635	2.00191	5.10258e-08	4.17966e-07	55.758	309.157	25.451	18.848	255.994	0
15130	NM_016956	Hbb-b2	2.32818	1.79708e-09	1.28364e-07	-1.04553	0.00697694	0.126985	-1.38538	0.000352498	0.139425	1.97054	3.5628e-07	2.55834e-06	75.318	418.159	32.886	24.725	344.162	1
100503605	NM_001201391	Hbb-bs	2.35475	1.59803e-10	1.36718e-08	-1.00149	0.00662687	0.122834	-1.36352	0.000220897	0.098869	2.00198	5.41123e-08	4.41717e-07	55.322	306.952	25.286	18.767	254.193	1
101488143	NM_008220	Hbb-bt	2.32776	1.75309e-09	1.26415e-07	-1.04767	0.0068155	0.124921	-1.38971	0.000333905	0.13715	1.9699	3.51309e-07	2.52704e-06	75.034	416.272	32.716	24.554	342.566	1
15200	NM_010415	Hbegf	1.18076	5.95445e-06	0.000207283	-1.09286	8.08715e-05	0.00395691	-0.777683	0.00455718	0.679899	2.04376	2.82872e-15	4.8962e-14	1.002	2.18	0.443	0.541	4.405	1
73389	NM_153198	Hbp1	-0.443498	0.00245505	0.0334735	-0.00795813	0.95655	0.995097	-0.000179634	0.999019	0.999991	0.102567	0.482386	0.623833	17.14	11.458	17.103	16.616	18.197	1
15162	NM_001172117	Hck	4.53474	1.26605e-45	1.00905e-42	0.2804	0.401163	0.905071	-0.225145	0.508844	0.999991	8.14253	1.28727e-143	1.25168e-140	0.378	10.863	0.476	0.302	165.458	1
15163	NM_008225	Hcls1	0.460231	0.000242466	0.00510663	-0.476562	0.00014835	0.00653662	-0.1546	0.218159	0.999991	1.35632	2.61706e-27	1.02512e-25	93.026	117.39	66.707	81.369	237.487	1
23900	NM_011827	Hcst	-0.678026	0.00510677	0.0589869	-0.0527906	0.825683	0.979392	0.00420315	0.986012	0.999991	-0.827303	0.000663621	0.00239095	14.697	8.208	14.069	14.286	7.948	1
208727	NM_207225	Hdac4	-0.615742	1.99593e-05	0.000597261	-0.184981	0.199652	0.777505	0.152191	0.291125	0.999991	-2.39131	1.30613e-60	2.20309e-58	19.563	11.61	17.246	20.99	3.594	1
79221	NM_001271386	Hdac9	-1.28827	0.000881313	0.0149784	-0.512705	0.183363	0.763913	0.00236505	0.995094	0.999991	-0.549666	0.153891	0.263091	0.806	0.266	0.546	0.775	0.519	1
15186	NM_008230	Hdc	1.86141	1.52763e-12	1.68853e-10	-0.110903	0.711884	0.961495	0.294061	0.311867	0.999991	3.67839	5.23765e-48	5.84989e-46	0.181	0.68	0.166	0.222	2.692	1
629303	NM_001045543	Heatr9	1.95644	0.000300965	0.006138	0.674623	0.225375	0.80033	-0.18339	0.74878	0.999991	3.90991	1.91055e-13	2.7776e-12	0.013	0.185	0.05	0.004	1.044	1
15211	NM_010421	Hexa	0.516317	0.000965241	0.016151	0.193525	0.217507	0.792124	0.0631719	0.687976	0.999991	1.63942	5.05375e-26	1.8482e-24	9.018	11.868	10.36	9.182	28.387	1
15216	NM_010424	Hfe	1.43808	1.43996e-08	9.04786e-07	0.0340481	0.898548	0.987082	0.835861	0.00123102	0.360985	4.19728	4.17936e-65	8.42498e-63	0.616	1.639	0.634	1.109	12.917	1
15242	NM_008245	Hhex	1.41731	2.11163e-05	0.000623323	-0.384055	0.251795	0.827968	-0.01646	0.960771	0.999991	3.74311	2.27041e-29	9.82457e-28	4.46	11.895	3.338	4.293	73.302	1
15248	NM_010430	Hic1	1.92251	1.34695e-06	5.46832e-05	0.117263	0.772114	0.975335	0.418386	0.299755	0.999991	6.21489	8.92751e-56	1.3176e-53	0.257	1.098	0.268	0.341	32.613	1
217310	NM_175454	Hid1	-1.20857	3.94781e-05	0.00107715	0.413237	0.158501	0.735414	0.0759388	0.795637	0.999991	-2.81323	2.73882e-21	7.32569e-20	10.698	4.005	14.534	11.033	1.312	1
15254	NM_008248	Hint1	0.422675	0.00433132	0.0518492	0.156494	0.291057	0.857987	0.0368875	0.803541	0.999991	0.154274	0.297981	0.440654	191.818	236.031	214.102	191.405	211.296	1
15284	NM_008250	Hlx	1.26776	0.0039157	0.0480126	0.680852	0.123939	0.670122	0.189283	0.671851	0.999991	4.65969	6.22196e-27	2.36434e-25	0.219	0.606	0.405	0.247	9.651	1
15356	NM_008254	Hmgcl	0.359161	0.00650813	0.0704892	0.343418	0.0092872	0.158236	0.228233	0.0844891	0.999991	0.498297	0.000157251	0.000655412	16.096	18.937	20.478	18.351	22.576	1
15312	NM_008251	Hmgn1	0.379513	0.00250269	0.0340505	0.125138	0.319033	0.872945	0.111376	0.375212	0.999991	-0.206913	0.0996312	0.184548	177.078	211.037	193.445	186.436	151.371	1
12807	NM_080634	Hps3	0.502178	0.00295564	0.0383523	-0.115482	0.497136	0.924073	0.119789	0.480343	0.999991	2.05377	1.55437e-34	8.59322e-33	3.63	4.748	3.361	3.839	15.477	1
15442	NM_152803	Hpse	2.51676	3.06953e-15	4.60346e-13	-0.0161205	0.960682	0.995097	0.448764	0.16702	0.999991	4.18826	1.22381e-39	8.87262e-38	0.552	3.375	0.55	0.767	12.551	1
15460	NM_021877	Hr	1.12933	0.00258689	0.0347897	0.211736	0.575112	0.937752	0.0581072	0.878074	0.999991	3.20466	7.43081e-18	1.5568e-16	0.307	0.684	0.367	0.311	3.615	1
15465	NM_008285	Hrh1	4.0137	1.48636e-19	3.81491e-17	0.553869	0.274643	0.843947	-0.0860361	0.871771	0.999991	6.72281	1.37913e-53	1.86861e-51	0.002	0.331	0.014	0	2.597	1
15476	NM_010474	Hs3st1	1.1089	0.00804097	0.0823288	0.624982	0.137504	0.697498	1.1007	0.00857557	0.999991	2.24307	6.51288e-08	5.26115e-07	0.399	0.92	0.687	0.971	2.433	1
54710	NM_018805	Hs3st3b1	1.16145	0.00124745	0.0199264	1.05236	0.00347763	0.0772707	0.388154	0.284983	0.999991	0.91036	0.0116045	0.0294702	0.248	0.561	0.568	0.327	0.501	1
15483	NM_008288	Hsd11b1	-1.19661	0.000689269	0.0124257	-0.552455	0.116657	0.650562	-0.189915	0.589481	0.999991	-2.308	7.17256e-11	8.14862e-10	20.463	7.51	13.442	16.89	3.451	1
15484	NM_008289	Hsd11b2	2.09178	3.60607e-05	0.000998295	0.381229	0.475447	0.920236	0.121256	0.822967	0.999991	3.12154	3.81093e-10	4.07206e-09	0.021	0.222	0.041	0.025	0.554	0
15488	NM_008292	Hsd17b4	0.370189	0.00507189	0.0587634	-0.0171549	0.896866	0.986529	0.194259	0.141861	0.999991	1.71069	1.25354e-38	8.45758e-37	20.394	24.161	20.228	22.746	66.927	1
27400	NM_013786	Hsd17b6	1.56312	0.00483691	0.0567793	0.185437	0.747284	0.971358	0.134204	0.816277	0.999991	1.92349	0.000483831	0.0018078	0.016	0.143	0.026	0.021	0.215	1
72630	NM_028306	Hspa12b	-0.878969	0.00785657	0.0811459	0.425342	0.182785	0.763913	0.237942	0.458329	0.999991	-1.40608	3.36539e-05	0.00016309	0.573	0.265	0.794	0.672	0.187	1
193740	NM_010479	Hspa1a	1.11282	0.00388617	0.047769	0.841763	0.0291241	0.328948	0.14232	0.713329	0.999991	1.20086	0.00183135	0.00586736	1.042	2.293	2.032	1.149	2.651	1
15511	NM_010478	Hspa1b	1.16597	0.0016633	0.0247907	0.873345	0.0186391	0.254583	0.164665	0.658764	0.999991	1.32871	0.000336915	0.00130886	1.07	2.431	2.126	1.195	2.976	1
15528	NM_008303	Hspe1	0.569616	3.17082e-05	0.00088918	0.204663	0.135192	0.691969	0.0897735	0.512455	0.999991	-0.293611	0.0323318	0.0714785	145.516	198.376	167.579	150.185	116.746	0
78558	NM_030127	Htra3	2.37741	3.56911e-17	6.9291e-15	2.04776	5.07282e-13	2.39775e-10	0.143374	0.634514	0.999991	4.44977	1.26644e-57	1.95647e-55	0.265	1.456	1.257	0.286	7.092	1
74096	NM_028752	Hvcn1	0.730798	3.65716e-05	0.00101059	0.438186	0.0135907	0.206013	0.205774	0.248254	0.999991	2.33152	2.74692e-40	2.09247e-38	3.94	6.057	5.387	4.426	20.355	1
433638	NM_001033780	I830077J02Rik	1.57282	6.24995e-11	5.87844e-09	-1.12946	3.90527e-06	0.000307648	-0.554409	0.0226607	0.999991	3.24164	1.50071e-41	1.24657e-39	11.524	32.843	5.094	7.459	117.801	1
15894	NM_010493	Icam1	0.902479	1.5042e-09	1.10039e-07	-0.250902	0.096232	0.604522	-0.0817868	0.587225	0.999991	2.37022	2.52033e-57	3.8575e-55	8.39	14.483	7.049	7.704	43.871	1
50723	NM_015790	Icosl	1.13848	1.04421e-12	1.18891e-10	0.555455	0.000591574	0.0201471	-0.696539	4.11989e-05	0.0269504	2.78179	4.56434e-70	1.10954e-67	1.977	4.054	2.942	1.164	13.922	1
269951	NM_173011	Idh2	0.836787	1.53667e-13	1.95545e-11	0.141536	0.212143	0.78772	0.110729	0.3291	0.999991	0.3372	0.00294518	0.00892299	122.445	200.809	135.298	128.772	153.102	1
15929	NM_008323	Idh3g	0.333177	6.69339e-05	0.0017173	0.0524921	0.530706	0.932366	0.0714466	0.393683	0.999991	-0.00631602	0.939909	0.964772	74.432	85.826	77.359	75.94	73.207	0
15937	NM_133662	Ier3	2.1116	3.32434e-16	5.59339e-14	-0.337058	0.200588	0.778675	-0.13919	0.596481	0.999991	4.34949	8.32448e-64	1.60004e-61	4.886	20.826	3.808	4.282	113.557	1
15951	NM_008329	Ifi204	0.468302	0.00654	0.0706164	-0.266044	0.123574	0.669274	-0.414425	0.016591	0.999991	-0.0801663	0.642348	0.762022	15.997	20.373	13.276	11.616	14.888	1
226695	NM_172648	Ifi205	0.701198	0.00501801	0.0583849	-0.0514202	0.837526	0.979392	-0.33526	0.182246	0.999991	1.41403	1.43577e-08	1.26106e-07	7.976	12.15	7.653	6.052	21.869	1
52668	NM_026790	Ifi27	0.867779	8.80865e-05	0.00215841	-0.118463	0.593486	0.94145	-0.153681	0.488825	0.999991	1.35048	1.01382e-09	1.02876e-08	26.229	44.525	24.115	22.749	68.718	1
76933	NM_029803	Ifi27l2a	1.85626	0.000256806	0.00535649	0.643709	0.206554	0.783518	-0.309753	0.545822	0.999991	3.69758	2.97018e-13	4.22886e-12	1.682	8.586	3.087	1.121	43.567	0
70110	NM_027320	Ifi35	0.418805	0.0069849	0.0741222	-0.0877176	0.573734	0.937661	-0.211979	0.174901	0.999991	0.878433	1.40115e-08	1.23197e-07	16.401	20.165	15.394	13.65	30.097	1
15953	NM_001271676	Ifi47	-0.520891	0.000217525	0.00466854	-0.472762	0.00078817	0.0251408	-0.273769	0.0517548	0.999991	-0.58402	3.41586e-05	0.000165038	40.337	25.605	28.883	32.127	26.419	1
15959	NM_010501	Ifit3	1.25223	0.00472403	0.0556701	0.472717	0.288825	0.855668	-0.154318	0.731191	0.999991	3.80635	5.42576e-18	1.1469e-16	0.448	1.193	0.675	0.377	9.888	0
667370	NM_001005858	Ifit3b	1.4035	0.00306352	0.0393476	0.115752	0.809119	0.979392	-0.0927561	0.847084	0.999991	3.66947	6.62459e-15	1.10834e-13	0.284	0.908	0.318	0.248	6.225	1
320802	NM_177265	Ifitm10	-1.0376	0.0044297	0.052735	-0.478881	0.172411	0.75138	-0.166228	0.631088	0.999991	-0.522677	0.138086	0.240979	0.21	0.082	0.144	0.178	0.137	1
213002	NM_001033632	Ifitm6	1.48346	0.00420037	0.0507227	0.0711234	0.895864	0.986529	0.274568	0.611384	0.999991	6.03302	9.35848e-34	4.9582e-32	0.057	0.439	0.071	0.1	19.444	0
15979	NM_010511	Ifngr1	-0.930877	1.29972e-14	1.8394e-12	-0.822646	9.637e-12	3.3404e-09	-0.217217	0.0717571	0.999991	-0.210294	0.0812582	0.155517	121.7	57.958	68.718	101.859	103.648	1
15982	NM_013562	Ifrd1	0.39431	0.00525414	0.060321	0.0973904	0.49162	0.922134	0.143936	0.309539	0.999991	-0.145638	0.304986	0.448086	15.357	18.525	16.519	16.463	13.685	0
15983	NM_025903	Ifrd2	0.315378	0.00640634	0.0697376	0.153819	0.184167	0.765812	0.0994084	0.391243	0.999991	-1.04384	6.84058e-19	1.54685e-17	22.632	25.809	25.275	23.565	10.773	1
67286	NM_026073	Ift22	0.481017	0.00307832	0.0395043	0.299607	0.0661611	0.51451	0.160008	0.328621	0.999991	0.745077	4.17998e-06	2.48097e-05	8.69	11.163	10.763	9.467	14.558	1
73916	NM_028680	Ift57	0.404668	0.00173555	0.0254665	-0.0893588	0.492072	0.922134	0.0285294	0.82626	0.999991	0.099536	0.442999	0.586667	8.183	9.938	7.701	8.119	8.668	1
16002	NM_010514	Igf2	-1.16702	0.00267321	0.0356341	-0.434295	0.263727	0.837432	-0.129934	0.738093	0.999991	-3.09249	1.81694e-15	3.19851e-14	98.812	36.297	71.157	86.66	8.526	1
111975	NR_002855	Igf2os	-1.22632	0.000890961	0.0151084	-0.316362	0.390081	0.901057	0.0153556	0.966708	0.999991	-2.55092	7.20415e-12	9.00111e-11	3.481	1.233	2.759	3.43	0.467	0
16136	NM_001190325	Igll1	2.01893	5.16125e-05	0.00135925	0.0758385	0.884362	0.984451	0.265014	0.609829	0.999991	-0.571771	0.28545	0.427167	0.142	0.866	0.158	0.186	0.062	1
16145	NM_018738	Igtp	-0.469493	0.000141246	0.00320194	-0.828553	2.05526e-11	6.67874e-09	-0.360808	0.0034395	0.606944	0.0174902	0.887012	0.929168	44.215	29.107	24.744	33.232	44.193	1
16161	NM_008353	Il12rb1	-0.829269	0.000323393	0.00652082	0.0838615	0.715539	0.962106	0.202242	0.37944	0.999991	-1.46155	2.60782e-10	2.83042e-09	17.255	8.678	18.484	19.285	5.953	1
16162	NM_008354	Il12rb2	1.29591	2.73172e-06	0.000101388	-0.974221	0.000437304	0.0159371	-0.485175	0.0796504	0.999991	0.828633	0.00271715	0.00831683	16.474	38.86	8.136	11.237	29.829	1
16164	NM_133990	Il13ra1	1.07727	0.00216264	0.0303229	0.142365	0.69526	0.957746	-0.793124	0.0398857	0.999991	4.0668	3.07371e-33	1.58776e-31	0.125	0.272	0.142	0.058	2.737	1
16169	NM_008358	Il15ra	-0.535817	0.00622925	0.0683548	0.176538	0.356931	0.890891	0.114496	0.551546	0.999991	0.501304	0.00845342	0.022415	2.969	1.874	3.425	3.153	4.215	1
16170	NM_010551	Il16	-0.645935	7.85277e-08	4.21683e-06	0.139224	0.245286	0.822259	0.0540124	0.652361	0.999991	-0.216897	0.0707238	0.1384	18.639	10.832	20.581	18.818	15.803	1
16173	NM_008360	Il18	1.31694	1.08646e-05	0.00035611	-1.18736	0.000512614	0.0180491	-0.638708	0.0518895	0.999991	2.34545	1.49487e-15	2.65416e-14	0.862	2.134	0.319	0.491	4.9	1
16178	NM_010555	Il1r2	3.56863	6.56755e-21	1.87646e-18	0.10035	0.808998	0.979392	-0.472904	0.274096	0.999991	7.00848	3.23356e-77	9.21564e-75	0.15	2.619	0.165	0.081	36.455	1
213208	NM_001033543	Il20rb	-0.99981	0.000151517	0.00340889	-0.218818	0.393517	0.902216	0.132231	0.60345	0.999991	-1.70091	6.13397e-10	6.38907e-09	1.132	0.494	0.964	1.201	0.312	1
60504	NM_021887	Il21r	-0.562183	0.00415773	0.0502879	-0.211232	0.280353	0.84961	0.0250548	0.898013	0.999991	1.08176	2.72544e-08	2.32225e-07	9.022	5.53	7.759	8.942	19.28	1
237310	NM_178258	Il22ra2	-1.38707	0.00632397	0.0690937	-1.08025	0.0308573	0.341114	-0.506259	0.301085	0.999991	-2.41389	7.26947e-06	4.07199e-05	0.141	0.031	0.049	0.087	0	1
16186	NM_013563	Il2rg	-0.402785	0.0024771	0.0337327	-0.127871	0.336456	0.880483	0.027844	0.834192	0.999991	-0.146929	0.269438	0.408794	114.465	78.856	104.864	113.153	101.885	0
218624	NM_139299	Il31ra	1.335	0.00030157	0.006138	-1.75873	2.77631e-06	0.000237939	-0.556532	0.134312	0.999991	-0.0405321	0.912934	0.947141	1.904	4.861	0.479	1.182	1.827	1
76527	NM_029646	Il34	-1.25398	0.00967414	0.0938472	-0.744209	0.123175	0.668971	0.268046	0.576974	0.999991	-1.20629	0.0127976	0.0320326	1.481	0.448	0.772	1.809	0.51	1
14204	NM_010215	Il4i1	1.32056	0.000597471	0.0109848	-0.0694005	0.85853	0.981472	-0.116734	0.76469	0.999991	3.8361	1.06832e-23	3.35091e-22	0.76	1.988	0.724	0.662	14.753	1
16192	NM_008370	Il5ra	3.7132	2.22703e-46	1.87355e-43	0.026094	0.92306	0.990279	0.413574	0.122787	0.999991	3.91592	2.01787e-51	2.5658e-49	0.551	7.604	0.565	0.732	9.467	1
16194	NM_010559	Il6ra	1.54	2.92776e-05	0.000834936	1.82235	6.83869e-07	6.97189e-05	0.322321	0.396814	0.999991	6.16392	1.01532e-65	2.0979e-63	0.13	0.427	0.583	0.166	15.001	1
216136	NM_173751	Ilvbl	-0.827564	7.98949e-14	1.07066e-11	0.366702	0.000832334	0.0261749	0.319142	0.00365475	0.621601	-1.06414	1.02747e-21	2.82597e-20	28.608	14.676	36.99	34.528	13.452	1
12695	NM_172696	Inadl	-0.814031	0.00121975	0.019608	-0.253776	0.308629	0.867324	-0.673917	0.00733586	0.931106	-0.864748	0.0006034	0.00220327	1.007	0.467	0.72	0.56	0.497	1
233875	NM_153580	Ino80e	0.358635	0.00060359	0.0110423	0.11559	0.270171	0.84043	0.126008	0.22968	0.999991	-0.181542	0.0845824	0.16096	36.008	42.305	39.143	38.202	31.349	0
16329	NM_008384	Inpp1	-0.355	0.00567954	0.0635663	-0.116949	0.358136	0.891085	-0.0205422	0.871664	0.999991	0.0466809	0.712569	0.814463	5.94	4.234	5.484	5.675	6.068	1
16330	NM_008385	Inpp5b	0.850176	1.41664e-07	7.17465e-06	-0.816307	5.07368e-07	5.34725e-05	0.102582	0.526272	0.999991	0.623294	0.000115017	0.000496016	15.007	24.996	8.489	15.676	22.994	0
170835	NM_172439	Inpp5j	1.0426	0.00566491	0.0635663	0.373885	0.330474	0.877431	-0.0792068	0.840004	0.999991	1.60579	1.65473e-05	8.57451e-05	0.131	0.281	0.18	0.12	0.471	1
23919	NM_011831	Insl5	-0.929289	0.00332742	0.0421297	-0.498543	0.11391	0.645501	0.316905	0.312827	0.999991	-4.52844	3.78395e-36	2.29958e-34	11.912	5.446	8.176	14.438	0.282	1
320495	NM_001170800	Ipcef1	-0.936575	2.0983e-06	8.06461e-05	-0.356549	0.0704336	0.528438	-0.241782	0.219853	0.999991	-1.5156	1.93143e-14	3.09665e-13	11.819	5.542	9.252	9.614	3.952	1
73914	NM_028679	Irak3	-1.19112	0.000496637	0.00942741	-2.17372	6.01435e-10	1.34017e-07	-0.960616	0.00484869	0.710918	-2.52172	1.48056e-12	1.97847e-11	1.368	0.505	0.255	0.638	0.188	1
266632	NM_029926	Irak4	0.629222	0.000597733	0.0109848	-0.0135584	0.941541	0.993766	-0.194809	0.294217	0.999991	2.06755	4.70406e-30	2.0791e-28	3.157	4.512	3.13	2.669	13.513	1
16364	NM_013674	Irf4	1.51109	7.51983e-05	0.00189472	0.187736	0.628471	0.947856	-0.257628	0.511391	0.999991	4.78718	8.38406e-37	5.33033e-35	0.195	0.598	0.226	0.151	7.87	1
27056	NM_012057	Irf5	2.04943	1.56356e-08	9.66407e-07	0.122034	0.737519	0.969019	-0.777227	0.0338464	0.999991	4.83806	9.38396e-41	7.28248e-39	2.379	10.555	2.623	1.22	94.123	0
54139	NM_016851	Irf6	1.41008	0.00107966	0.017694	0.529032	0.23255	0.80899	0.107094	0.812953	0.999991	2.57461	1.15698e-09	1.16615e-08	0.047	0.152	0.078	0.05	0.413	1
319909	NM_001276489	Ism1	1.63037	0.00515292	0.059384	1.16215	0.0474406	0.431223	0.647784	0.27339	0.999991	1.75737	0.00253997	0.00786102	0.003	0.073	0.046	0.021	0.09	1
381924	NM_001029872	Itgad	2.18169	9.7731e-10	7.55072e-08	-1.38501	0.000161757	0.00698916	-0.389695	0.281637	0.999991	4.44366	9.82142e-36	5.73668e-34	0.778	3.804	0.255	0.544	22.475	1
16409	NM_001082960	Itgam	1.66632	1.3795e-05	0.000436113	-1.64446	2.33918e-05	0.00143711	-0.917758	0.0175982	0.999991	4.90757	1.24121e-37	8.20689e-36	1.279	4.293	0.337	0.59	55.088	1
16411	NM_021334	Itgax	4.05691	2.39586e-17	4.90278e-15	-1.04477	0.0300786	0.335358	-0.980625	0.0417686	0.999991	6.5203	3.06394e-42	2.65225e-40	0.835	24.521	0.299	0.295	187.594	1
192897	NM_133663	Itgb4	-0.628447	0.00128717	0.0203038	-0.484099	0.0131102	0.201869	0.27927	0.15163	0.999991	-3.76258	2.11391e-76	5.82382e-74	9.057	5.293	6.441	10.732	0.603	1
16428	NM_010583	Itk	-0.674443	2.57854e-05	0.000746593	0.357211	0.0255001	0.305962	0.040383	0.800768	0.999991	-1.43759	3.89691e-19	8.98408e-18	24.032	13.645	31.099	24.051	8.577	1
16439	NM_010586	Itpr2	-0.728568	0.00238184	0.0328183	0.0137046	0.954402	0.995097	-0.0516875	0.82927	0.999991	-1.0988	4.65993e-06	2.73151e-05	10.943	5.917	11.124	10.333	4.884	1
64931	NM_022888	Izumo1r	-0.902602	0.00985109	0.0952586	-0.15898	0.648898	0.950855	0.311649	0.371858	0.999991	-2.71039	1.62284e-14	2.62995e-13	17.52	8.064	15.518	21.626	2.122	1
16452	NM_008413	Jak2	1.08562	2.56411e-09	1.75694e-07	-0.464309	0.0109985	0.179075	0.0578619	0.751141	0.999991	1.80573	3.6604e-23	1.09812e-21	19.276	38.011	13.948	19.536	68.359	1
16453	NM_010589	Jak3	-0.481646	0.00225722	0.0314743	0.319316	0.0425029	0.407438	0.0557845	0.723222	0.999991	0.113936	0.469374	0.611262	25.214	16.303	31.023	25.411	27.011	1
16069	NM_152839	Jchain	2.4698	2.41209e-09	1.68207e-07	0.178164	0.672435	0.953982	-0.11047	0.794416	0.999991	0.441941	0.292677	0.43495	0.423	2.799	0.493	0.366	0.603	1
81703	NM_030887	Jdp2	1.56831	1.1078e-23	3.99415e-21	-0.721598	7.00188e-06	0.000505626	0.206029	0.19284	0.999991	1.03231	4.67814e-11	5.43809e-10	8.718	24.112	5.256	9.782	17.907	1
59091	NM_001205076	Jph2	-1.40392	0.00511863	0.0590788	-0.458117	0.359326	0.892367	-0.355798	0.476481	0.999991	-2.2855	5.90245e-06	3.37487e-05	1.148	0.303	0.774	0.832	0.14	1
16477	NM_008416	Junb	1.00156	9.38099e-11	8.55761e-09	0.0959726	0.536223	0.933437	-0.131789	0.396455	0.999991	2.2792	2.2406e-49	2.66455e-47	21.705	40.213	23.338	19.169	106.891	1
16478	NM_001286944	Jund	-0.527624	0.00501995	0.0583849	0.38997	0.0379469	0.382609	-0.0927661	0.621665	0.999991	-0.156498	0.405119	0.552435	59.019	37.069	78.015	53.834	52.243	1
68691	NM_177645	Kansl1l	-0.584622	0.000764869	0.0134367	0.159084	0.357202	0.890891	-0.080996	0.63989	0.999991	-1.21982	3.22927e-12	4.19984e-11	5.855	3.534	6.583	5.377	2.432	1
71529	NM_001109685	Kazn	0.766046	0.000158362	0.00353178	-0.42484	0.0419337	0.404754	-0.119947	0.562777	0.999991	1.07131	1.12611e-07	8.75978e-07	1.091	1.73	0.807	0.973	2.321	1
16506	NM_008423	Kcnd1	0.788688	0.00798879	0.0820397	0.81324	0.00618746	0.118377	-0.238465	0.449729	0.999991	2.4081	3.37602e-17	6.80556e-16	0.17	0.286	0.319	0.135	1.022	1
16523	NM_008428	Kcnj8	-1.63081	1.95202e-10	1.66064e-08	-0.318812	0.183262	0.763913	0.0490224	0.836366	0.999991	-3.33986	2.00173e-27	7.93492e-26	1.369	0.375	1.09	1.39	0.094	1
210741	NM_199251	Kcnk12	4.26196	3.62424e-49	3.65879e-46	-0.0527946	0.880657	0.984451	-1.12355	0.005402	0.750055	4.62898	5.19924e-58	8.18509e-56	0.119	2.774	0.113	0.028	3.894	1
52150	NM_001033525	Kcnk6	1.49546	2.42152e-09	1.68207e-07	-0.44525	0.0897098	0.587025	-0.00899505	0.972287	0.999991	2.98317	2.32618e-33	1.20917e-31	0.513	1.399	0.369	0.501	4.421	1
16533	NM_031169	Kcnmb1	1.5524	0.000786268	0.0137171	0.2783	0.551174	0.93664	0.698532	0.133285	0.999991	1.07949	0.0199169	0.0469948	0.164	0.567	0.211	0.289	0.415	1
16534	NM_001163510	Kcnn4	0.385341	0.000948719	0.0159273	-0.27573	0.018305	0.251602	-0.0804878	0.490764	0.999991	-0.538437	4.21132e-06	2.49599e-05	52.365	62.75	43.301	48.271	35.478	1
333088	NM_001029985	Kcp	1.66158	0.000830496	0.0142911	0.915114	0.0745228	0.541768	0.128005	0.811683	0.999991	4.37638	1.88415e-20	4.78417e-19	0.005	0.046	0.024	0.006	0.432	0
104263	NM_001038695	Kdm3a	-0.561191	0.00471236	0.0555758	-0.200261	0.312966	0.870436	-0.0097534	0.9608	0.999991	-1.07573	6.25847e-08	5.06623e-07	22.99	14.079	20.097	22.223	10.555	1
368204	NM_183322	Khdc1a	1.13915	6.28505e-05	0.00162414	-0.722108	0.0112371	0.181822	0.144424	0.61199	0.999991	1.23252	1.49179e-05	7.82336e-05	76.836	162.234	45.139	81.843	187.106	1
433278	NM_001033904	Khdc1c	1.10616	8.31874e-05	0.00206509	-0.800076	0.00447374	0.0935264	0.158162	0.573856	0.999991	1.13816	5.14648e-05	0.00023984	96.379	198.505	53.454	103.481	218.599	1
16578	NM_001163569	Kif9	0.740168	0.00289658	0.0378707	-0.0302579	0.906746	0.988002	0.342386	0.177483	0.999991	2.6269	2.23697e-28	9.24427e-27	0.365	0.576	0.374	0.442	2.449	1
16594	NM_008451	Klc2	0.523666	5.56007e-06	0.000194448	0.171465	0.140956	0.705363	0.0898995	0.442528	0.999991	1.23436	1.76627e-27	7.0353e-26	3.554	4.69	4.025	3.666	8.327	1
270201	NM_177771	Klhl18	1.35271	2.54361e-16	4.37704e-14	-0.531912	0.00139697	0.0387559	-0.436562	0.00871694	0.999991	2.01605	2.30083e-34	1.2552e-32	7.485	17.804	5.167	5.33	30.723	1
77113	NM_178633	Klhl2	0.514744	0.00170511	0.0252049	0.0936508	0.569594	0.937661	0.14115	0.391529	0.999991	0.234723	0.153621	0.262837	5.18	6.812	5.571	5.557	6.045	1
75785	NM_029436	Klhl24	-0.695499	0.000867262	0.0147894	-0.0584795	0.779164	0.976592	0.18049	0.386665	0.999991	-0.257266	0.217546	0.347057	10.25	5.695	9.922	11.302	8.407	1
70788	NM_027551	Klhl30	1.10053	0.00185638	0.026875	-1.10737	0.00296416	0.0685978	-0.874956	0.0181166	0.999991	2.8624	2.66553e-16	5.02408e-15	0.394	0.846	0.159	0.183	3.449	0
234796	NM_146219	Klhl36	0.457022	0.00327568	0.0415789	-0.179661	0.25267	0.828843	-0.20414	0.19458	0.999991	0.847281	4.37382e-08	3.6204e-07	5.422	6.848	4.785	4.557	9.745	1
232539	NM_001081237	Klhl42	-0.465067	0.0058146	0.0648384	-0.0275564	0.869807	0.982948	0.101289	0.546739	0.999991	-1.13217	2.59092e-11	3.10123e-10	4.809	3.164	4.729	4.996	2.133	1
71778	NM_175174	Klhl5	0.599384	0.00075699	0.0133498	-0.1426	0.424556	0.908793	0.00778695	0.965203	0.999991	1.45271	2.80533e-16	5.28156e-15	8.593	12.006	7.816	8.397	23.749	1
16643	NM_010654	Klrd1	1.58166	0.000280313	0.00577521	0.804949	0.0649	0.508765	0.127235	0.77102	0.999991	4.21622	2.95694e-22	8.53022e-21	3.106	10.533	6.166	3.295	92.127	0
320407	NM_177155	Klri2	1.24446	0.00756471	0.0790017	1.60626	0.000529563	0.0185205	0.491212	0.29993	0.999991	4.22242	2.08996e-20	5.28241e-19	0.051	0.156	0.237	0.082	1.892	1
98256	NM_133809	Kmo	4.104	1.25461e-83	9.49931e-80	0.227069	0.32868	0.876457	-0.247957	0.304851	0.999991	6.69145	8.1507e-222	1.34731e-217	0.444	7.867	0.53	0.355	53.077	1
214162	NM_001081049	Kmt2a	-0.602751	0.00227473	0.031602	-0.084936	0.667076	0.952983	0.149605	0.448608	0.999991	-0.953256	1.39949e-06	9.10056e-06	17.742	10.571	16.831	19.067	8.883	1
74127	NM_028770	Krt80	2.05658	2.66617e-05	0.000764657	-1.53734	0.00191063	0.0488558	-1.73004	0.000493136	0.174735	3.56328	3.27654e-13	4.63708e-12	1.45	7.703	0.332	0.261	28.437	1
70789	NM_027552	Kynu	1.63223	0.00130331	0.0204731	0.247788	0.643044	0.950436	0.144023	0.78931	0.999991	6.67562	4.8337e-43	4.36618e-41	0.01	0.127	0.01	0.014	7.089	1
16728	NM_008478	L1cam	0.976038	0.00374284	0.0463054	0.0084423	0.980305	0.995097	0.2721	0.424411	0.999991	2.99083	2.3018e-19	5.38172e-18	0.262	0.511	0.265	0.312	2.5	1
80907	NM_030717	Lactb	0.826065	0.000118235	0.00277969	-0.273394	0.205782	0.783212	-0.55408	0.0106163	0.999991	1.63629	2.08223e-14	3.32553e-13	6.765	11.17	5.584	4.427	21.56	1
16763	NM_133664	Lad1	2.30987	3.08884e-07	1.4849e-05	0.434177	0.34527	0.887153	0.230091	0.618769	0.999991	4.87798	1.48596e-27	5.96188e-26	0.121	0.836	0.181	0.141	6.859	1
16768	NM_008479	Lag3	1.30921	8.52881e-08	4.5139e-06	1.45643	2.43753e-09	4.63665e-07	-0.00495605	0.984163	0.999991	4.11104	6.40619e-65	1.26065e-62	1.592	3.783	4.588	1.522	30.742	1
66192	NM_025410	Lage3	0.333267	0.00647525	0.0702901	0.100363	0.413725	0.907177	0.117505	0.33898	0.999991	0.174757	0.154389	0.263669	29.491	34.054	31.593	30.991	32.894	0
52855	NM_001113474	Lair1	1.6144	2.96504e-17	5.83112e-15	-1.06225	8.67061e-08	1.11988e-05	0.000833879	0.996573	0.999991	2.9144	5.92825e-53	7.96699e-51	2.452	7.08	1.144	2.378	19.183	1
16792	NM_010686	Laptm5	0.458115	0.000694138	0.0124986	-1.03657	1.71278e-14	1.27219e-11	-0.294208	0.0294203	0.999991	1.35219	1.33654e-23	4.15283e-22	413.639	522.195	200.051	326.233	1056.02	1
214048	NM_001040399	Larp1b	-0.550246	0.000532947	0.00998815	0.21815	0.162392	0.741686	-0.0600741	0.702378	0.999991	-1.11452	6.21663e-12	7.81452e-11	6.155	3.81	7.193	5.729	2.758	0
240754	NM_001159649	Lax1	-0.613363	0.00676104	0.0722529	-0.0308484	0.891441	0.985869	0.297781	0.187402	0.999991	-1.33647	4.15415e-09	3.92165e-08	15.098	8.923	14.84	18.039	5.716	1
77889	NM_029999	Lbh	0.4953	0.00161192	0.0243363	-0.358501	0.022597	0.286326	-0.212737	0.175979	0.999991	1.13594	4.60927e-13	6.44052e-12	50.659	65.598	39.454	42.458	111.388	1
102308570	NM_001286103	Lbhd1	0.535576	0.00697205	0.0740377	0.132736	0.504348	0.926221	0.181133	0.362294	0.999991	0.334667	0.0920621	0.172773	22.209	29.753	24.435	24.669	27.916	0
16821	NM_010695	Lcn4	-1.9697	1.76789e-08	1.07515e-06	0.22148	0.513422	0.929196	-0.210345	0.536387	0.999991	-3.28098	5.45305e-19	1.24158e-17	6.182	1.233	7.273	5.098	0.428	1
18826	NM_008879	Lcp1	0.489379	0.00629726	0.0688516	-0.880641	8.91315e-07	8.79919e-05	-0.272138	0.128789	0.999991	1.14283	1.76873e-10	1.94396e-09	183.983	237.635	99.137	147.639	407.95	1
16822	NM_010696	Lcp2	0.633454	9.60197e-06	0.000317677	-0.440115	0.0021476	0.0532791	-0.108632	0.448461	0.999991	0.780819	4.85966e-08	3.99652e-07	39.44	56.247	29.025	35.589	67.331	1
16832	NM_008492	Ldhb	1.11412	0.000111501	0.00264649	-0.159381	0.58112	0.940247	0.477252	0.0981548	0.999991	0.805717	0.00521404	0.0147079	19.606	40.821	17.394	27.295	35.125	0
52662	NM_172631	Ldlrad4	-0.53145	0.00458332	0.0542652	-0.341384	0.0684044	0.522257	-0.00282691	0.98795	0.999991	-1.73177	4.7964e-20	1.17285e-18	21.051	13.199	16.656	20.204	6.059	1
270035	NM_173012	Letm2	-0.545296	0.00137338	0.0212432	0.253013	0.124811	0.671356	0.000404654	0.998064	0.999991	-0.210007	0.211028	0.338866	2.318	1.436	2.775	2.243	1.971	1
19141	NM_011175	Lgmn	0.808059	0.00173154	0.0254569	-0.413681	0.11165	0.640732	0.113325	0.661776	0.999991	2.77683	2.92012e-27	1.13844e-25	4.763	7.839	3.547	5.035	35.378	1
218454	NM_172589	Lhfpl2	1.91008	5.17079e-05	0.0013594	-0.163055	0.730182	0.965874	0.21576	0.647974	0.999991	0.68823	0.14504	0.250838	1.421	6.474	1.243	1.68	2.559	1
76429	NM_029609	Lhpp	0.726606	0.000868404	0.0147922	0.389876	0.0760219	0.547203	0.0708187	0.749732	0.999991	0.518444	0.0180409	0.0431947	2.005	3.095	2.659	2.028	2.883	1
16880	NM_013584	Lifr	1.20414	5.14863e-05	0.00135829	0.00822354	0.97836	0.995097	0.0889409	0.769194	0.999991	3.44119	1.0975e-31	5.16855e-30	0.213	0.481	0.161	0.266	2.645	1
18726	NM_011090	Lilra6	4.34173	3.74663e-26	1.71925e-23	-0.126882	0.782809	0.976951	-0.37764	0.421719	0.999991	7.30779	8.54208e-72	2.24128e-69	0.045	1.765	0.038	0.022	17.428	1
16890	NM_010719	Lipe	1.60193	1.12257e-22	3.73363e-20	-0.323802	0.0545578	0.466699	-0.13423	0.424063	0.999991	3.57836	5.61756e-108	2.73113e-105	2.652	7.746	2.105	2.373	33.811	1
67164	NM_026010	Lipt2	0.474841	0.00770048	0.0798874	-0.0755397	0.678005	0.954969	0.129833	0.472926	0.999991	-0.253666	0.167333	0.281127	2.886	3.703	2.749	3.071	2.375	0
214895	NM_001013374	Lman2l	-0.332467	0.000188134	0.00412885	0.0638127	0.47125	0.919293	0.101358	0.252674	0.999991	-0.870023	3.85665e-22	1.10295e-20	25.755	18.69	27.019	26.824	13.873	1
109594	NM_057173	Lmo1	1.16898	0.000811821	0.0141303	-0.80137	0.024351	0.298854	-0.250338	0.478672	0.999991	0.743927	0.0335245	0.0736914	2.185	4.876	1.155	1.744	3.811	0
380928	NM_201529	Lmo7	-1.36897	8.00248e-06	0.000269892	-1.18635	0.000101931	0.00477453	0.00113449	0.996982	0.999991	-3.37105	1.45791e-23	4.51429e-22	0.783	0.257	0.323	0.753	0.054	1
270084	NM_173014	Lpcat2	1.36255	0.000154533	0.00346343	-1.60011	9.7335e-06	0.000671784	-0.884451	0.0143096	0.999991	2.67515	1.07285e-13	1.60057e-12	8.07	20.907	2.337	3.938	61.058	1
80877	NM_030695	Lrba	1.2836	2.70516e-08	1.57214e-06	-0.652717	0.0047921	0.0983516	0.0335892	0.884468	0.999991	2.34771	2.62871e-24	8.58747e-23	6.556	15.093	4.122	6.528	34.983	1
16970	NM_008511	Lrmp	0.473299	4.67816e-07	2.11467e-05	0.10695	0.255613	0.831258	0.0620971	0.509472	0.999991	0.113095	0.229356	0.361312	49.128	62.512	53.02	49.967	52.483	1
16971	NM_008512	Lrp1	0.961306	0.00624774	0.068508	-0.213235	0.544387	0.935891	-0.176458	0.615928	0.999991	2.39642	9.18141e-12	1.13599e-10	3.01	5.724	2.586	2.524	18.391	1
228357	NM_172668	Lrp4	1.2468	0.00897852	0.0888059	0.185681	0.699048	0.957978	0.223236	0.642174	0.999991	1.8745	8.26656e-05	0.000367922	0.107	0.292	0.128	0.128	0.537	1
16975	NM_001080926	Lrp8	0.632788	0.00963118	0.0934903	-0.204772	0.402743	0.905371	-0.00459029	0.985032	0.999991	-0.49652	0.0426105	0.0903595	6.566	9.495	5.639	6.372	4.531	1
211228	NM_153074	Lrrc25	2.62068	1.5203e-20	4.03894e-18	-1.65131	8.68735e-08	1.11988e-05	-0.76841	0.00969381	0.999991	3.90017	9.21733e-44	8.70643e-42	1.725	10.885	0.474	0.931	29.851	1
241568	NM_178725	Lrrc4c	3.53853	1.1857e-21	3.74065e-19	0.585786	0.132587	0.685061	0.328281	0.405494	0.999991	2.91475	4.6049e-15	7.81509e-14	0.09	1.383	0.153	0.118	0.935	1
192976	NM_198861	Lrrc75a	0.92732	6.1532e-06	0.000213353	-0.36175	0.0836734	0.571166	-0.0188109	0.927932	0.999991	0.864156	2.56079e-05	0.000127423	3.197	5.67	2.471	3.072	5.872	1
71268	NM_001164838	Lrrfip2	0.462416	0.000125461	0.00291389	0.203105	0.0937657	0.595844	0.0699173	0.565838	0.999991	0.917779	1.80617e-14	2.9071e-13	4.466	5.656	5.128	4.558	8.392	1
233328	NM_146191	Lrrk1	1.32157	4.0463e-05	0.00109612	0.253202	0.434895	0.910095	-0.479828	0.142889	0.999991	4.52616	2.10326e-45	2.1461e-43	0.423	1.049	0.515	0.278	12.264	1
78651	NM_001191004	Lsm6	0.4609	1.57474e-05	0.000486816	0.0229069	0.830782	0.979392	0.0174417	0.870857	0.999991	0.00971985	0.927781	0.956778	10.759	13.573	10.927	10.582	10.697	1
16988	NM_010734	Lst1	1.28669	0.000155465	0.00347742	-0.773344	0.0244997	0.298854	-0.320933	0.349072	0.999991	2.61008	1.49733e-14	2.43222e-13	13.394	32.53	7.36	10.128	95.012	1
16993	NM_008517	Lta4h	0.346991	0.00094816	0.0159273	-0.0735247	0.483984	0.922059	0.0224081	0.831077	0.999991	-0.065063	0.535694	0.6717	128.031	149.078	121.848	126.388	120.896	1
16995	NM_008519	Ltb4r1	1.41929	0.00034939	0.00697997	0.594234	0.13867	0.70052	-0.419368	0.308566	0.999991	2.38675	1.40049e-09	1.39542e-08	0.494	1.424	0.816	0.337	3.259	1
17000	NM_010736	Ltbr	1.13769	0.000522733	0.00983322	0.798116	0.0152181	0.221843	-0.0637826	0.847861	0.999991	3.10844	1.32933e-21	3.63804e-20	1.096	2.381	2.021	0.995	11.281	1
17076	NM_013825	Ly75	-1.00914	0.000205945	0.00444881	-0.507495	0.0613643	0.495681	-0.247855	0.360545	0.999991	-0.457202	0.0918702	0.172491	4.356	1.904	3.034	3.513	3.084	1
17096	NM_001111096	Lyn	1.52452	7.89087e-12	8.07375e-10	-0.649993	0.0038129	0.0829783	-0.1618	0.470266	0.999991	3.2636	1.04587e-48	1.20897e-46	5.943	16.228	3.742	5.134	60.949	1
71897	NM_027990	Lypd6b	-1.68005	2.34543e-10	1.98418e-08	-0.468547	0.0702528	0.528098	-0.221594	0.39089	0.999991	-3.45194	1.101e-32	5.53178e-31	3.229	0.86	2.294	2.643	0.231	1
93730	NM_033322	Lztfl1	-0.86244	9.23366e-06	0.000306634	1.45117	4.03851e-14	2.62469e-11	0.39434	0.0407404	0.999991	-0.819201	2.52201e-05	0.00012572	6.193	3.056	17.502	7.938	3.411	1
17113	NM_010749	M6pr	0.395343	0.000191176	0.00417746	-0.135127	0.203124	0.781146	0.0397943	0.707692	0.999991	0.66182	4.13657e-10	4.40577e-09	56.76	68.357	51.849	56.477	88.871	1
17155	NM_008548	Man1a	-1.04195	2.61718e-05	0.000753461	-0.284513	0.249825	0.826577	0.00508236	0.983591	0.999991	0.063416	0.797428	0.873789	9.964	4.279	8.188	9.825	10.305	1
17159	NM_010764	Man2b1	1.08482	5.3966e-12	5.67505e-10	-0.333812	0.0341449	0.36108	-0.121279	0.441416	0.999991	2.62165	2.08774e-62	3.83449e-60	35.476	69.707	28.154	31.609	222.301	1
53859	NM_016896	Map3k14	1.3652	2.37684e-31	1.33305e-28	-0.15968	0.190277	0.772055	0.0480407	0.692011	0.999991	3.00875	1.17956e-149	1.77255e-146	2.35	5.6	2.106	2.347	19.077	1
399510	NM_201519	Map4k5	1.263	0.00243561	0.0333175	1.21942	0.00343608	0.0766752	0.447079	0.287008	0.999991	3.01472	3.26502e-13	4.62871e-12	0.216	0.562	0.598	0.296	2.436	1
26415	NM_011950	Mapk13	1.60344	7.26981e-08	3.95995e-06	0.254171	0.404399	0.905371	-0.442955	0.156462	0.999991	1.29354	1.51833e-05	7.93991e-05	1.009	3.054	1.223	0.697	2.633	1
17164	NM_008551	Mapkapk2	0.663225	4.39011e-05	0.00117248	0.0244907	0.880199	0.984451	0.0406996	0.802249	0.999991	0.743796	4.59173e-06	2.70015e-05	31.721	46.242	32.35	31.735	52.964	1
72925	NM_001166375	March1	5.81822	3.28659e-56	6.2211e-53	0.526048	0.164627	0.744708	0.262853	0.490423	0.999991	6.54311	1.21198e-70	3.03547e-68	0.17	14.507	0.268	0.208	26.92	1
56527	NM_019945	Mast1	0.810428	0.000112762	0.00266806	0.0384714	0.856373	0.981397	0.086711	0.683463	0.999991	1.22381	4.74205e-09	4.45122e-08	1.001	1.64	1.033	1.029	2.379	1
17179	NM_001285854	Matk	0.982993	0.000230702	0.00491352	1.53931	7.56034e-09	1.28181e-06	-0.831631	0.00216009	0.51026	1.59222	2.27256e-09	2.20455e-08	4.089	7.671	12.535	2.132	12.921	1
17180	NM_010769	Matn1	1.28726	0.00165969	0.0247857	1.18515	0.00381229	0.0829783	0.570643	0.166678	0.999991	1.45239	0.000381772	0.00146182	0.425	1.114	1.13	0.669	1.38	1
214763	NM_173386	Mb21d1	0.651813	0.00867082	0.0864968	0.330221	0.184234	0.765812	-0.12443	0.617953	0.999991	0.953856	0.000120588	0.000517476	2.848	4.17	3.645	2.516	5.605	1
218121	NM_153546	Mboat1	0.999732	8.29058e-07	3.51665e-05	-0.674189	0.000999591	0.0300416	-0.0296416	0.884426	0.999991	-0.109211	0.592342	0.721213	6.484	12.093	4.029	6.199	5.92	1
77582	NM_029934	Mboat7	0.60466	6.55047e-07	2.87955e-05	-0.262486	0.0319292	0.345855	0.0581454	0.633858	0.999991	1.18987	9.84139e-23	2.88437e-21	14.744	20.573	12.305	14.891	33.472	1
17196	NM_001025245	Mbp	-0.396435	0.00103312	0.017045	-0.263115	0.0293514	0.329996	-0.00637396	0.957886	0.999991	-0.6533	6.59126e-08	5.3174e-07	30.497	21.117	25.521	29.551	19.051	1
68279	NM_026656	Mcoln2	-0.815914	1.05194e-10	9.42574e-09	0.0199032	0.872063	0.983048	-0.268154	0.0313656	0.999991	-1.58873	5.7426e-34	3.08198e-32	6.88	3.548	6.991	5.497	2.219	1
244049	NM_001024703	Mctp2	0.644492	0.00388775	0.047769	-1.4785	1.3328e-10	3.35167e-08	-0.318948	0.157129	0.999991	1.52591	6.65824e-12	8.34425e-11	1.605	2.33	0.551	1.234	4.725	1
76137	NM_001081059	Mcur1	0.570956	0.00245529	0.0334735	-0.613034	0.00132542	0.0373174	-0.0594343	0.754072	0.999991	0.886991	2.42794e-06	1.5122e-05	3.026	4.15	1.968	2.82	5.611	1
234959	NM_144933	Med17	0.342595	0.0101162	0.0973869	-0.0900048	0.500473	0.924733	0.09535	0.475014	0.999991	0.257092	0.0537685	0.109863	10.597	12.31	9.986	11.005	12.533	1
68975	NM_026896	Med27	0.349099	0.00854878	0.0859739	0.231631	0.0815928	0.565889	0.299033	0.0245685	0.999991	0.361309	0.00650952	0.0178563	12.255	14.321	14.443	14.704	15.597	1
17260	NM_001170537	Mef2c	1.84636	7.49675e-11	6.96462e-09	0.381169	0.189021	0.771921	0.554665	0.0553758	0.999991	4.3517	2.63233e-54	3.62604e-52	0.231	0.836	0.309	0.343	5.619	1
269878	NM_001160400	Megf8	0.952304	0.0053829	0.0613658	0.582837	0.0887009	0.585509	0.0477734	0.889193	0.999991	1.69529	7.08963e-07	4.83264e-06	1.051	1.981	1.652	1.064	3.782	1
17268	NM_001193271	Meis1	1.47635	2.41012e-09	1.68207e-07	-0.160529	0.520907	0.929885	-0.143668	0.565851	0.999991	1.81295	2.21315e-13	3.20064e-12	2.16	5.761	1.93	1.874	7.936	1
67943	NM_023403	Mesdc2	0.565394	1.0122e-05	0.00033321	-0.116254	0.365473	0.893836	0.0728748	0.570276	0.999991	-0.215011	0.0944147	0.176347	13.917	18.912	12.855	14.21	11.827	1
17295	NM_008591	Met	2.54724	8.33865e-13	9.63909e-11	-0.75388	0.0397595	0.393446	-0.846026	0.0215023	0.999991	1.73627	1.15044e-06	7.61888e-06	0.293	1.876	0.162	0.143	1.101	1
17299	NM_010792	Mettl1	0.469672	0.00155389	0.0236726	0.103934	0.486586	0.9221	0.0872878	0.559715	0.999991	-0.45406	0.00272523	0.00833299	12.293	15.647	13.257	12.665	8.811	0
67493	NM_026197	Mettl16	0.378836	0.00723431	0.0759703	-0.00783392	0.955833	0.995097	0.0860672	0.542802	0.999991	-0.326193	0.021522	0.0502379	11.598	13.833	11.565	12.005	9.102	1
320204	NM_001252094	Mettl20	-0.86624	1.28265e-06	5.2528e-05	-0.142082	0.413749	0.907177	0.0457004	0.791919	0.999991	-1.09452	1.56723e-09	1.55128e-08	3.655	1.815	3.27	3.607	1.636	1
228019	NM_145524	Mettl8	-0.560422	1.93169e-06	7.51968e-05	0.0272034	0.815186	0.979392	0.132526	0.254574	0.999991	-1.58069	1.86939e-38	1.25105e-36	10.647	6.551	11.079	11.227	3.404	1
73822	NM_028657	Mfsd12	0.738613	1.15958e-06	4.7846e-05	0.000403064	0.997904	0.999061	-0.198006	0.199243	0.999991	1.41573	7.08536e-21	1.85318e-19	7.36	11.335	7.412	6.193	19.729	1
211666	NM_174995	Mgst2	-0.805682	0.0100538	0.0969712	-0.291467	0.351029	0.889087	-0.210299	0.501012	0.999991	-0.0675778	0.828734	0.894493	34.911	17.473	28.016	28.676	32.678	1
320878	NM_177282	Mical2	1.17609	0.00120789	0.0194586	2.01678	2.53961e-08	3.80892e-06	0.396931	0.277657	0.999991	3.60312	1.82778e-23	5.59503e-22	0.288	0.662	1.398	0.372	4.557	1
216001	NM_144822	Micu1	0.463782	0.0031899	0.0407291	0.363708	0.0208265	0.272071	0.0437625	0.781553	0.999991	0.737201	2.6855e-06	1.65639e-05	10.846	13.753	14.048	10.858	18.062	1
71148	NM_027696	Mier1	-0.780035	2.01527e-07	9.94046e-06	-0.359157	0.0166093	0.23638	-0.0386881	0.796321	0.999991	-1.38903	2.46865e-20	6.19223e-19	38.459	20.389	30.117	36.152	14.395	1
70427	NM_027422	Mier2	0.530906	0.000571313	0.010591	0.191459	0.215292	0.789908	0.0812907	0.599398	0.999991	0.885755	8.47815e-09	7.68332e-08	8.749	11.629	10.056	8.998	16.138	0
67014	NM_025910	Mina	0.352654	0.0076129	0.0793954	-0.00334965	0.979895	0.995097	-0.114229	0.391827	0.999991	1.28965	6.36356e-23	1.8885e-21	7.46	8.74	7.477	6.708	18.211	1
100316680	NR_035436	Mir1903	-1.02618	0.00600617	0.0665336	0.429631	0.236387	0.813944	0.0870885	0.811389	0.999991	-1.32644	0.000442558	0.00166906	21.351	8.604	30.117	22.209	7.23	1
100628611	NR_039567	Mir5107	1.75787	0.000194743	0.00424316	-0.104006	0.840238	0.979392	-0.337795	0.520573	0.999991	6.15658	8.23197e-43	7.35538e-41	0.531	3.747	0.437	0.176	120.89	0
735280	NR_030416	Mir675	-1.1447	1.31091e-06	5.3507e-05	-0.333151	0.157646	0.73307	0.112473	0.632967	0.999991	-4.16022	3.42287e-62	6.21759e-60	403.558	161.442	318.524	426.463	18.902	1
381232	NR_028427	Mirt1	-0.973343	0.00169408	0.0251013	-0.594066	0.0550806	0.468973	0.0712991	0.817678	0.999991	-1.25223	5.4887e-05	0.000254406	4.546	2.016	2.929	4.582	1.76	1
17346	NM_001285487	Mknk1	0.283109	0.00620219	0.0681565	-0.223001	0.0323684	0.349399	0.0323471	0.755559	0.999991	0.764641	1.10382e-13	1.64379e-12	13.009	14.517	11.18	12.925	21.787	1
17347	NM_021462	Mknk2	0.258802	0.0101429	0.097582	-0.0226158	0.822334	0.979392	0.0871466	0.386869	0.999991	-0.073865	0.463403	0.606016	74.646	81.759	73.779	77.069	70.058	1
23948	NM_011846	Mmp17	-0.807628	0.000750194	0.0132712	0.0672621	0.777571	0.976397	0.0131784	0.955893	0.999991	-3.39295	3.2701e-40	2.46825e-38	4.346	2.218	4.593	4.266	0.353	0
240047	NM_001033339	Mmp25	2.3012	5.80286e-05	0.00151244	0.961373	0.0960096	0.603367	0.0236175	0.967776	0.999991	3.30045	7.23785e-09	6.6357e-08	0.011	0.231	0.061	0.011	0.612	0
433938	NM_001081235	Mn1	1.0955	0.000301185	0.006138	0.47961	0.118571	0.654913	0.634207	0.0386024	0.999991	2.64271	7.11872e-19	1.60317e-17	0.177	0.373	0.257	0.278	1.261	1
381308	NM_001033450	Mnda	0.651828	0.000359084	0.0071173	-0.213157	0.245455	0.822445	-0.322175	0.0795937	0.999991	0.880196	1.41921e-06	9.22153e-06	13.335	19.385	11.453	10.291	24.516	0
100040462	NM_001170853	Mndal	0.787262	3.9276e-08	2.25286e-06	-0.11796	0.411756	0.905851	-0.422028	0.00337675	0.604546	1.44697	4.98836e-24	1.59801e-22	33.013	52.526	30.365	23.882	89.896	1
17450	NM_010816	Morc1	-1.18126	3.27173e-05	0.000915781	-0.68961	0.0146592	0.216019	0.108826	0.69827	0.999991	-5.30826	4.56898e-48	5.14081e-46	2.71	1.038	1.62	2.858	0.025	1
75746	NM_029413	Morc4	1.32948	0.00361671	0.0451136	-0.173081	0.712251	0.961612	0.0379102	0.935382	0.999991	1.7548	0.000115533	0.000497982	0.089	0.27	0.078	0.094	0.402	1
70380	NM_001290514	Mospd1	-0.482207	0.000622276	0.0113123	-0.0906842	0.516604	0.929196	0.0110691	0.936866	0.999991	-0.724183	3.31851e-07	2.39886e-06	7.412	4.896	6.951	7.495	4.48	1
70456	NM_027430	Mpc2	0.524818	0.0019528	0.0278975	0.249152	0.142224	0.706844	0.118917	0.484382	0.999991	0.676489	6.45609e-05	0.000294235	22.451	29.741	26.699	23.69	35.741	1
17524	NM_008621	Mpp1	-0.67451	9.60814e-06	0.000317677	-0.0190075	0.900512	0.987084	-0.00130743	0.99314	0.999991	-1.57556	8.8493e-25	2.99752e-23	31.372	17.829	31.029	30.436	10.221	0
381269	NM_001005423	Mreg	1.52481	0.00540826	0.0614383	0.555918	0.312238	0.870436	0.503066	0.360781	0.999991	2.98144	4.97786e-08	4.08357e-07	0.146	0.656	0.275	0.256	2.616	1
668725	NM_001288801	Mrgpra9	1.77038	0.000889985	0.0151084	0.097808	0.862651	0.9816	-0.095434	0.867374	0.999991	5.46073	1.28902e-26	4.83165e-25	0.007	0.199	0.015	0	4.338	1
244238	NM_175534	Mrgpre	-0.617196	0.0021406	0.0301536	0.263321	0.188565	0.771362	0.162459	0.417524	0.999991	-2.03017	2.35997e-23	7.15784e-22	8.555	5.031	10.387	9.348	1.974	1
100040766	NM_001281466	Mroh2a	-0.636071	0.00289935	0.0378707	0.280508	0.18579	0.767264	0.026778	0.899699	0.999991	-1.25046	6.45193e-09	5.95812e-08	2.042	1.183	2.507	2.012	0.821	1
56282	NM_027204	Mrpl12	0.439436	0.00277057	0.0366166	0.178724	0.223958	0.800205	0.105756	0.47198	0.999991	-0.531926	0.000307209	0.00120507	76.184	94.898	86.35	79.877	51.775	0
94063	NM_025606	Mrpl16	0.430885	4.52456e-05	0.00120626	0.0466549	0.662001	0.95142	0.0496084	0.64275	0.999991	0.239966	0.0238719	0.054882	13.427	16.588	13.897	13.493	15.668	1
27397	NM_025301	Mrpl17	0.317688	0.00343932	0.0433424	0.0851074	0.434529	0.910095	-0.00989041	0.927809	0.999991	0.281986	0.00946436	0.0246994	4.701	5.369	4.989	4.535	5.656	0
94064	NM_053161	Mrpl27	0.412745	0.00173516	0.0254665	0.360992	0.00618868	0.118377	0.121531	0.358859	0.999991	-0.0292227	0.825678	0.892421	24.999	30.53	32.19	26.36	24.204	1
56280	NM_025500	Mrpl37	0.270252	0.00948942	0.0926853	0.152364	0.144219	0.708291	0.135539	0.194464	0.999991	-0.0521793	0.618138	0.742313	22.997	25.397	25.61	24.566	21.905	1
60441	NM_024177	Mrpl38	0.305895	0.00998889	0.096468	0.27134	0.0223539	0.283826	0.1697	0.153949	0.999991	-0.125683	0.29264	0.434934	19.86	22.496	24.037	21.721	17.99	0
94067	NM_053164	Mrpl43	0.408237	0.00124252	0.0198999	0.145213	0.251626	0.827968	0.0479179	0.705602	0.999991	0.340396	0.00713152	0.0193379	31.502	38.307	34.898	31.648	39.479	0
64657	NM_001146212	Mrps10	0.4075	0.000392295	0.00767509	0.201753	0.0803858	0.561941	0.0766205	0.508463	0.999991	-0.0763405	0.511085	0.649764	16.988	20.663	19.571	17.362	15.902	0
218506	NM_173757	Mrps27	0.390761	0.00399982	0.0487675	0.116811	0.390752	0.901057	0.0942908	0.488858	0.999991	-0.133386	0.328511	0.473738	14.338	17.235	15.588	14.897	12.895	0
50529	NM_025305	Mrps7	0.46619	0.000165436	0.00367871	0.156728	0.206342	0.78322	0.111954	0.36713	0.999991	0.0869654	0.483501	0.624786	31.287	39.66	34.93	32.898	32.88	0
69902	NM_001290810	Mrto4	0.465292	0.000573801	0.010598	0.172745	0.201684	0.779043	0.118549	0.381244	0.999991	-0.633579	3.22499e-06	1.95639e-05	40.668	51.557	45.854	42.933	25.752	1
60361	NM_021718	Ms4a4b	1.1004	6.61235e-06	0.00022757	-0.979719	6.51763e-05	0.00335518	-0.806717	0.00100392	0.304905	1.02035	2.94652e-05	0.000144415	29.013	58.706	14.265	15.618	59.658	1
64380	NM_029499	Ms4a4c	2.23523	2.00855e-11	1.98484e-09	-0.690076	0.0424281	0.407007	-0.81467	0.0169406	0.999991	3.94342	2.02133e-32	9.94421e-31	1.869	9.299	1.087	0.943	35.826	1
69774	NM_027209	Ms4a6b	0.350011	0.00172318	0.0253696	-0.377569	0.000772204	0.0247327	-0.272885	0.0150568	0.999991	0.0265785	0.812304	0.884021	34.227	39.961	26.365	27.331	34.28	1
73656	NM_028595	Ms4a6c	1.45346	0.000540087	0.010097	-0.0889703	0.832742	0.979392	-0.395655	0.348284	0.999991	3.26836	6.75619e-15	1.12922e-13	2.851	8.456	2.628	1.963	38.058	1
76824	NM_001256112	Mtfr1l	0.401695	0.000987691	0.0164358	-0.0691803	0.572198	0.937661	0.109166	0.372248	0.999991	0.318618	0.00904363	0.0237522	17.088	20.676	16.373	18.014	21.031	1
17768	NM_008638	Mthfd2	0.413846	0.00641054	0.0697376	0.0136009	0.92868	0.990429	0.0563128	0.710968	0.999991	-0.511174	0.000785234	0.00278181	40.083	48.994	40.575	40.644	27.609	1
107885	NM_026829	Mthfs	0.782449	1.12184e-05	0.000365335	-0.0238438	0.895356	0.986352	0.0223868	0.901785	0.999991	1.5921	1.7549e-19	4.1264e-18	7.217	11.526	7.083	7.109	22.019	1
100039707	NM_001128601	Mthfsl	0.694099	5.38484e-06	0.000188756	-0.0183427	0.906143	0.987772	-0.00863982	0.955805	0.999991	1.50317	1.81205e-23	5.55718e-22	8.058	12.044	7.943	7.75	22.945	1
211401	NM_144800	Mtss1	-0.456704	0.00161462	0.0243405	0.133	0.356073	0.890891	0.154055	0.285256	0.999991	-0.701915	1.35546e-06	8.83855e-06	6.641	4.404	7.339	7.207	3.997	1
17855	NM_023556	Mvk	0.42958	0.00083722	0.0143579	-0.0512635	0.69231	0.956791	0.0497425	0.700849	0.999991	0.19977	0.121679	0.217727	10.905	13.48	10.533	10.944	12.381	0
78388	NM_080638	Mvp	0.521842	0.0101878	0.0978895	0.318539	0.117271	0.652541	0.085123	0.676245	0.999991	2.55396	1.01721e-36	6.39335e-35	4.842	6.424	6.091	5.001	29.632	0
50918	NM_001093765	Myadm	2.04476	1.65918e-08	1.0172e-06	-0.0979894	0.787355	0.977541	-0.243056	0.503683	0.999991	4.45313	9.03936e-35	5.04799e-33	3.845	16.889	3.553	2.982	112.904	1
16918	NM_008506	Mycl	4.09548	7.88048e-32	4.58977e-29	-0.0461758	0.906327	0.987902	-0.14239	0.719888	0.999991	6.75664	8.20101e-85	3.22768e-82	0.061	1.461	0.058	0.05	11.093	1
17874	NM_010851	Myd88	0.689008	4.45765e-06	0.000159203	-0.444499	0.00333574	0.0748645	-0.234523	0.120964	0.999991	2.01855	1.51829e-41	1.25486e-39	14.718	21.853	10.787	12.128	60.16	1
66915	NR_028108	Myeov2	0.73496	1.79788e-05	0.000544507	0.172377	0.315643	0.872763	0.167848	0.328719	0.999991	0.755632	1.0378e-05	5.6264e-05	67.556	104.163	76.259	73.802	113.675	1
67268	NM_026064	Myl12a	0.394909	0.00107099	0.01759	0.134027	0.267098	0.839321	0.0231308	0.848158	0.999991	0.903057	7.18631e-14	1.08881e-12	116.731	140.669	128.181	114.889	216.929	1
67938	NM_023402	Myl12b	0.49344	8.24012e-05	0.0020523	0.0119312	0.924215	0.990324	0.0519897	0.678522	0.999991	0.964397	1.36745e-14	2.23579e-13	179.966	232.579	181.267	180.692	349.25	1
360013	NM_001291213	Myo18a	-0.459112	0.00673272	0.0721029	-0.276629	0.102451	0.618244	0.104795	0.536012	0.999991	-0.699203	3.70266e-05	0.000177354	26.259	17.67	22.279	27.557	17.016	1
17916	NM_053214	Myo1f	1.09007	0.00207863	0.0294175	-1.24455	0.000447785	0.0161306	-0.709483	0.0452842	0.999991	2.66143	5.53872e-14	8.49305e-13	14.804	31.04	5.728	8.338	110.144	1
329421	NM_177376	Myo3b	-1.60145	0.0025246	0.0341367	-0.969373	0.0624714	0.500991	-0.272083	0.595884	0.999991	-1.17421	0.0249387	0.0569798	0.077	0.012	0.029	0.057	0.023	1
237558	NM_001033333	Myrfl	1.58241	0.00518701	0.0596861	0.761962	0.186369	0.768433	-0.0963298	0.87052	0.999991	-0.11784	0.841872	0.901948	0.007	0.065	0.03	0.005	0.005	0
69816	NM_027222	Mzb1	-0.973412	0.00680544	0.0725227	-0.00757214	0.983182	0.995097	0.429659	0.231505	0.999991	-4.74419	2.81757e-37	1.84089e-35	34.521	14.996	34.282	46.506	0.779	0
100637	NM_133898	N4bp2l1	0.360425	0.00898503	0.0888122	-0.399137	0.00491751	0.100529	-0.116105	0.40896	0.999991	2.38411	2.58021e-71	6.6642e-69	3.804	4.485	2.878	3.401	20.036	1
212706	NM_145974	N4bp3	0.430373	0.00971329	0.0941666	-1.48514	3.42184e-18	5.33738e-15	-0.0477407	0.775199	0.999991	0.623621	0.000176202	0.000727065	7.996	9.907	2.792	7.53	12.28	0
67111	NM_025972	Naaa	1.1991	7.53931e-05	0.00189647	-0.261383	0.3964	0.904351	-0.240907	0.434869	0.999991	2.0814	5.09749e-12	6.4717e-11	1.121	2.511	0.927	0.902	5.231	1
109019	NM_028696	Nabp1	-0.794011	6.17217e-06	0.000213391	0.00315087	0.985647	0.995097	0.140835	0.421252	0.999991	-0.490578	0.00517014	0.014604	21.258	11.065	21.423	22.646	14.796	1
17939	NM_008669	Naga	0.883765	1.47644e-05	0.000461937	0.132017	0.518369	0.929885	-0.132994	0.515813	0.999991	2.33418	2.02698e-30	9.08021e-29	16.408	28.184	18.058	14.465	85.677	1
27426	NR_027804	Nagpa	0.591148	1.69326e-05	0.000519049	0.118539	0.391114	0.901057	0.0350252	0.800422	0.999991	1.19891	1.80347e-18	3.94851e-17	8.08	11.172	8.77	8.03	18.545	1
16541	NM_008437	Napsa	0.921364	0.00369574	0.0458848	-1.34461	2.34021e-05	0.00143711	-0.468906	0.13986	0.999991	2.92128	3.34474e-20	8.3266e-19	47.239	85.859	17.191	32.149	409.994	1
67563	NM_026238	Narfl	0.398247	0.0102295	0.0981658	0.276439	0.0749565	0.543801	0.172463	0.267357	0.999991	0.736051	1.96767e-06	1.24572e-05	8.011	9.702	9.73	8.735	13.296	0
269642	NM_001001985	Nat8l	1.11667	0.000541858	0.0101176	0.229791	0.47903	0.920652	0.55759	0.0852487	0.999991	0.84917	0.00862522	0.022801	0.564	1.198	0.68	0.837	1.063	1
233038	NM_001081115	Nccrp1	2.53412	9.02767e-16	1.46996e-13	0.482095	0.160953	0.740354	-0.0998044	0.78287	0.999991	6.29592	2.78865e-94	1.24585e-91	0.172	1.185	0.265	0.151	19.44	1
17969	NM_001286037	Ncf1	1.84459	3.90665e-07	1.83153e-05	-1.58878	1.35832e-05	0.000901574	-0.251149	0.4904	0.999991	3.22641	6.89874e-19	1.55787e-17	8.278	32.492	2.365	6.578	98.888	1
17970	NM_010877	Ncf2	1.27736	4.08395e-07	1.89703e-05	-0.310847	0.21947	0.794679	-0.656987	0.00958645	0.999991	2.95529	8.58408e-32	4.08919e-30	6.19	14.283	4.937	3.721	51.904	1
17973	NM_010878	Nck1	-0.35038	0.00553276	0.0623907	-0.0970355	0.440803	0.911122	0.0109291	0.930786	0.999991	-0.757014	2.65512e-09	2.56062e-08	17.683	12.64	16.593	17.354	10.26	1
17988	NM_008681	Ndrg1	-1.40112	3.65193e-07	1.72278e-05	0.032925	0.904759	0.987533	0.324449	0.238329	0.999991	-2.86513	3.44135e-25	1.19507e-23	45.916	15.055	47.252	56.814	5.571	1
15531	NM_008306	Ndst1	0.737664	0.00406322	0.0494212	-0.813972	0.00153555	0.0414385	-0.0649234	0.800431	0.999991	1.14568	8.08706e-06	4.49493e-05	23.34	36.453	13.043	21.621	52.872	1
70316	NM_028177	Ndufab1	0.362549	0.00695816	0.073994	0.168578	0.210031	0.786153	0.168699	0.209916	0.999991	-0.583383	1.6312e-05	8.46319e-05	51.805	61.074	58.338	56.926	33.959	0
68493	NM_026742	Ndufaf4	0.335693	0.0102631	0.0984258	0.125523	0.338558	0.881432	0.0758367	0.563857	0.999991	-0.539754	4.85266e-05	0.000227607	5.209	6.029	5.705	5.321	3.528	1
76947	NM_001085493	Ndufaf6	0.308819	0.00766503	0.0797742	0.15524	0.183253	0.763913	0.115048	0.326689	0.999991	-0.43643	0.00030808	0.00120791	6.65	7.552	7.424	6.974	4.83	1
73694	NM_028611	Ndufaf7	0.431453	1.43471e-05	0.00045262	-0.122122	0.226891	0.801776	0.0367083	0.715634	0.999991	0.328955	0.000977126	0.00337059	7.191	8.888	6.613	7.16	8.932	0
67264	NM_026061	Ndufb8	0.741945	2.41179e-07	1.18577e-05	0.209719	0.145102	0.70958	0.155215	0.281133	0.999991	0.397215	0.00575404	0.0160179	80.967	124.754	93.806	87.673	105.733	1
17996	NM_010889	Neb	1.03776	0.000481024	0.00918556	-1.86369	6.81453e-10	1.47629e-07	-0.22914	0.442554	0.999991	1.02899	0.000537448	0.00198614	0.591	1.166	0.148	0.482	1.242	1
18002	NM_008683	Nedd8	0.380415	0.0067773	0.072306	0.190475	0.175407	0.75464	0.0752419	0.59267	0.999991	0.218297	0.120432	0.215986	139.072	166.048	158.697	142.202	160.137	0
18003	NM_001111324	Nedd9	1.15924	2.21053e-08	1.31787e-06	-0.0962147	0.643112	0.950436	-0.0528196	0.799225	0.999991	1.36448	4.5079e-11	5.25127e-10	10.18	21.281	9.564	9.532	26.583	1
72774	NM_028347	Neil1	-0.926097	5.30523e-09	3.57053e-07	0.321752	0.0383625	0.384561	0.203533	0.191154	0.999991	-1.2099	3.96237e-14	6.17905e-13	13.558	6.439	17.031	15.198	5.705	1
27632	NM_001045864	Nelfe	0.51337	0.000220312	0.00471213	0.111279	0.423925	0.908793	0.125311	0.367996	0.999991	1.31233	3.0063e-21	7.98942e-20	40.489	52.891	44.027	43.082	99.748	0
18010	NM_010893	Neu1	0.582694	1.70929e-06	6.77587e-05	0.482728	7.62218e-05	0.0038106	0.207564	0.0915828	0.999991	1.24808	3.94921e-25	1.36856e-23	3.095	4.26	4.351	3.478	7.33	1
214854	NM_153408	Neurl3	2.1425	1.96111e-09	1.39423e-07	-1.38864	0.000153787	0.00670046	-0.69244	0.0565736	0.999991	4.85275	2.90361e-42	2.53951e-40	1.237	5.859	0.404	0.699	48.745	1
74039	NM_001271411	Nfam1	1.92284	6.39042e-09	4.22577e-07	-1.4761	1.00848e-05	0.00069296	-1.57267	2.62447e-06	0.00278981	4.00939	8.68548e-34	4.61643e-32	3.29	12.759	1.069	0.959	65.26	1
56748	NM_001170591	Nfu1	0.618558	8.37161e-08	4.46378e-06	0.297216	0.0103254	0.172068	0.245701	0.0343047	0.999991	0.881786	1.8899e-14	3.03597e-13	24.605	34.686	30.277	28.344	45.066	1
52530	NM_026631	Nhp2	0.531125	0.000300735	0.006138	0.0114608	0.937927	0.992479	0.0331818	0.821646	0.999991	-0.304372	0.0388891	0.0836133	66.021	87.731	66.401	65.807	52.647	1
66164	NM_025391	Nip7	0.460959	4.75022e-08	2.67407e-06	0.0757954	0.372176	0.896936	0.11092	0.191861	0.999991	-0.296407	0.000536926	0.00198466	13.054	16.457	13.793	13.672	10.482	0
70701	NM_001081205	Nipal1	-1.22271	0.000493024	0.00937922	0.239335	0.488209	0.922134	0.0813243	0.814095	0.999991	-1.14638	0.00107661	0.00367011	0.995	0.352	1.204	1.026	0.405	0
66536	NM_025623	Nipsnap3b	0.526351	0.000135211	0.00308852	-0.186526	0.180038	0.762004	-0.0446706	0.747901	0.999991	0.189848	0.170319	0.285303	13.045	17.254	11.491	12.277	14.724	1
217011	NM_145431	Nle1	0.341941	0.00273487	0.0362964	0.0704719	0.538332	0.933437	0.0609357	0.595104	0.999991	-0.73841	2.17029e-10	2.37582e-09	15.751	18.309	16.574	15.918	9.281	1
268973	NM_001033367	Nlrc4	1.93217	8.37075e-09	5.41702e-07	0.0607903	0.863038	0.9816	-0.531544	0.144921	0.999991	3.2894	3.08422e-23	9.28638e-22	0.153	0.625	0.161	0.094	1.849	1
434341	NM_001033207	Nlrc5	-1.20546	2.12214e-06	8.13561e-05	-0.918853	0.000297114	0.0117326	-0.51543	0.0422211	0.999991	-0.385871	0.128163	0.227116	6.093	2.328	3.128	3.99	4.543	0
244202	NM_175532	Nlrp10	2.05841	1.58132e-08	9.73409e-07	-0.49885	0.232028	0.808415	-0.927981	0.033656	0.999991	3.97575	2.90465e-29	1.24711e-27	0.048	0.239	0.029	0.015	1.066	1
637515	NM_001040696	Nlrp1b	1.5344	5.17085e-07	2.3235e-05	-0.681286	0.0413936	0.402279	-0.715275	0.0335001	0.999991	4.05423	4.97336e-42	4.23761e-40	0.177	0.521	0.101	0.094	3.539	1
216799	NM_145827	Nlrp3	2.18068	7.92248e-06	0.00026779	-0.235488	0.643759	0.950436	0.728794	0.143311	0.999991	6.4998	2.51383e-41	2.02701e-39	0.035	0.282	0.025	0.073	9.745	1
18102	NM_008704	Nme1	0.472473	0.00457119	0.054164	0.252304	0.13004	0.678834	0.138061	0.407542	0.999991	-0.607584	0.000272434	0.00108098	99.026	126.468	118.124	106.245	63.767	1
56520	NM_019731	Nme4	0.57051	0.00138282	0.0213238	0.141161	0.430142	0.909911	0.174157	0.330528	0.999991	-0.485418	0.00703671	0.0191153	20.469	28.026	22.662	22.519	14.342	0
14767	NM_010341	Nmur1	2.22058	1.9604e-06	7.61188e-05	0.109948	0.818711	0.979392	1.05224	0.0258832	0.999991	1.69799	0.000291258	0.00114795	0.247	1.598	0.282	0.637	1.122	1
107607	NM_172729	Nod1	1.254	1.73821e-05	0.000530681	-0.0511045	0.861963	0.9816	0.019038	0.948355	0.999991	3.45736	1.35641e-32	6.77384e-31	1.431	3.248	1.36	1.369	18.13	1
257632	NM_145857	Nod2	2.56418	1.13921e-17	2.42974e-15	-0.129117	0.699963	0.958393	-0.426711	0.216677	0.999991	4.56579	2.26483e-54	3.14601e-52	0.09	0.589	0.081	0.06	2.707	1
217431	NM_001008421	Nol10	0.484092	0.00204837	0.0290708	-0.0934931	0.552883	0.93664	0.0794267	0.613907	0.999991	-0.379263	0.0163288	0.0396297	10.53	13.539	9.89	10.788	7.963	1
97961	NM_133800	Nol12	0.439534	0.00475847	0.0560323	0.263686	0.0907346	0.588516	0.159473	0.306947	0.999991	0.27909	0.0734185	0.142727	12.377	15.426	14.885	13.432	14.886	1
211548	NM_153057	Nomo1	0.581978	6.99712e-05	0.0017808	-0.0195244	0.893997	0.986149	0.0871827	0.551814	0.999991	-0.159252	0.277299	0.417845	24.813	34.156	24.601	25.662	21.948	1
28126	NM_178605	Nop16	0.526065	1.35682e-06	5.49365e-05	0.238677	0.0288197	0.327407	0.142815	0.191704	0.999991	-0.0743171	0.497811	0.637893	20.836	27.518	24.635	22.31	19.567	1
110109	NM_138747	Nop2	0.429117	0.00160574	0.0242673	0.0846117	0.534292	0.932932	0.122521	0.368221	0.999991	-0.503403	0.00022542	0.000909938	32.584	40.28	34.715	34.567	22.652	1
18129	NM_010928	Notch2	0.600037	0.00949316	0.0926853	-0.7111	0.00214369	0.0532791	-0.0141636	0.951208	0.999991	1.77449	1.66038e-14	2.68553e-13	8.387	11.808	5.07	8.049	29.638	1
18132	NM_010929	Notch4	3.71958	1.54684e-62	4.68476e-59	0.382748	0.122758	0.667606	0.290575	0.247	0.999991	4.24063	2.38788e-81	8.39822e-79	0.11	1.51	0.148	0.133	2.355	1
228961	NM_213733	Npepl1	0.298022	0.00920998	0.090504	0.311872	0.00642289	0.120561	0.106491	0.352865	0.999991	0.0980342	0.392285	0.540058	28.57	32.194	35.609	29.863	30.291	0
74091	NM_028749	Npl	1.1834	4.25484e-08	2.42222e-06	-0.107918	0.631691	0.947856	-0.122724	0.587182	0.999991	1.39308	9.52649e-11	1.06979e-09	1.525	3.276	1.417	1.357	4.107	1
18168	NM_016708	Npy5r	1.82177	0.000900447	0.0152352	-0.4103	0.479312	0.920652	-0.0609422	0.9156	0.999991	-0.767602	0.190626	0.312294	0.023	0.156	0.01	0.02	0	0
75692	NM_001025587	Nr2c2ap	0.572768	0.000130404	0.00300564	0.166742	0.266618	0.838973	0.0385007	0.797866	0.999991	0.401578	0.00738045	0.0199312	23.61	33.026	27.233	23.487	31.216	1
18175	NM_008733	Nrap	1.34871	0.00940242	0.0919773	1.04381	0.0454249	0.420497	0.601224	0.253746	0.999991	0.957209	0.0670673	0.132168	0.02	0.086	0.072	0.045	0.067	1
27206	NM_013724	Nrk	-1.70505	0.00109734	0.017945	-0.497061	0.325249	0.875494	0.276282	0.58006	0.999991	-2.43844	5.81443e-06	3.32915e-05	0.084	0.013	0.054	0.104	0.002	0
106582	NM_134122	Nrm	0.608092	2.39585e-05	0.000703109	-0.473396	0.00107229	0.0317375	-0.133952	0.353863	0.999991	1.15746	8.09168e-16	1.46341e-14	33.026	46.295	23.737	29.301	73.62	1
18186	NM_008737	Nrp1	-1.11842	0.00110763	0.0180936	0.550202	0.108342	0.631956	0.115343	0.736444	0.999991	-1.15385	0.000765932	0.00272101	17.021	6.649	26.036	18.108	7.03	1
224109	NM_146069	Nrros	0.529488	0.000217521	0.00466854	-0.632907	1.0238e-05	0.000697348	-0.205005	0.152681	0.999991	1.52423	1.70336e-26	6.3273e-25	48.975	64.953	31.492	41.174	141.127	1
18207	NM_008743	Nthl1	0.539866	0.00955315	0.0929713	0.308044	0.141452	0.705363	0.267583	0.202871	0.999991	0.220359	0.294356	0.436895	3.132	4.225	3.907	3.695	3.63	0
74137	NM_001195025	Nuak2	1.07394	0.000617293	0.0112352	0.06401	0.844652	0.979674	0.173376	0.594838	0.999991	2.97599	1.09487e-22	3.20323e-21	0.196	0.412	0.208	0.215	1.821	1
26425	NM_011955	Nubp1	0.285553	0.00138085	0.0213153	0.175681	0.0493664	0.439798	0.174172	0.0515592	0.999991	0.223701	0.0123051	0.0309688	23.772	26.523	26.908	26.006	27.431	1
26426	NM_011956	Nubp2	0.363574	0.00216016	0.0303163	0.0628738	0.596461	0.942578	0.0469292	0.692854	0.999991	0.136107	0.251557	0.3879	38.818	45.782	40.633	38.842	42.168	1
66387	NM_025529	Nudt8	0.775099	2.32531e-08	1.3748e-06	0.000724143	0.995902	0.998172	-0.405934	0.00455105	0.679899	0.61128	1.12779e-05	6.06058e-05	12.669	19.998	12.698	9.194	19.245	1
18230	NM_008750	Nxn	0.768029	0.000249304	0.00523607	-0.0168508	0.93608	0.991965	-0.0142649	0.945886	0.999991	0.125136	0.551314	0.684998	11.737	18.574	11.648	11.326	12.704	1
246730	NM_145211	Oas1a	2.12187	6.78359e-07	2.9689e-05	0.655245	0.131564	0.683135	0.401739	0.358269	0.999991	3.94723	1.29521e-20	3.32449e-19	0.217	1.203	0.388	0.302	5.419	0
23960	NM_011852	Oas1g	1.80112	0.000122115	0.00284929	0.587795	0.217178	0.791932	0.287679	0.548899	0.999991	3.54205	2.46843e-14	3.91585e-13	0.131	0.621	0.232	0.169	2.739	1
246728	NM_145227	Oas2	2.70937	1.76072e-15	2.77735e-13	0.519987	0.131437	0.682702	-0.262605	0.451715	0.999991	4.69467	1.82481e-43	1.70419e-41	0.474	3.445	0.715	0.37	16.329	1
246727	NM_145226	Oas3	1.11482	6.05074e-05	0.00157164	1.28739	3.57427e-06	0.000291288	0.16392	0.557752	0.999991	2.82091	2.19053e-24	7.21303e-23	1.293	2.687	3.356	1.421	10.08	1
23962	NM_011854	Oasl2	0.798709	0.00283444	0.0372586	-0.279814	0.297621	0.860755	-0.103138	0.700894	0.999991	1.4868	2.6307e-08	2.24615e-07	4.393	7.213	3.582	3.951	12.853	1
18242	NM_016978	Oat	0.386591	0.00893737	0.0885724	-0.172747	0.24368	0.821158	-0.158806	0.283959	0.999991	0.484876	0.00103877	0.00355356	27.724	33.257	24.648	24.147	38.58	1
380698	NM_001171512	Obscn	1.55739	0.00163267	0.0245517	0.710087	0.1612	0.740529	0.349308	0.497837	0.999991	1.87863	0.000131254	0.000557171	0.003	0.015	0.008	0.005	0.022	1
18263	NM_013614	Odc1	0.382699	0.00265757	0.0356138	0.100799	0.42894	0.909437	0.0424124	0.739336	0.999991	-0.784699	8.16486e-10	8.37252e-09	57.321	68.497	61.666	57.663	32.682	1
70155	NM_001081079	Ogfrl1	1.13637	1.20361e-09	9.20515e-08	-0.207439	0.271057	0.84043	-0.424164	0.0248458	0.999991	2.33093	6.67996e-36	3.9577e-34	3.5	7.169	3.034	2.52	18.094	1
258711	NM_146716	Olfr432	2.22662	9.07013e-05	0.00221174	-0.012377	0.983416	0.995097	0.0253161	0.96611	0.999991	3.15881	2.05787e-08	1.77911e-07	0	0.311	0	0	0.764	1
258712	NM_146717	Olfr433	4.14905	9.96999e-21	2.69599e-18	-0.253433	0.636923	0.948053	-0.0805174	0.879902	0.999991	5.34935	5.28816e-34	2.85664e-32	0.015	1.42	0	0.008	3.705	1
18356	NM_010999	Olfr56	-0.56379	0.00616533	0.06785	-0.714257	0.000556499	0.0192895	-0.363403	0.076311	0.999991	-0.56163	0.00640766	0.0176032	2.709	1.653	1.625	1.997	1.783	1
67013	NM_025909	Oma1	0.388003	8.60552e-05	0.00211548	0.0795989	0.425531	0.908793	0.182071	0.0680105	0.999991	0.670319	8.17119e-12	1.01556e-10	7.013	8.405	7.433	7.728	11.056	1
18378	NM_011010	Omp	-1.06071	0.00269978	0.035925	0.417068	0.22259	0.797969	0.220677	0.520386	0.999991	-1.86817	3.45855e-07	2.49106e-06	0.857	0.342	1.177	0.977	0.186	0
75475	NM_153122	Oplah	0.544597	0.00427493	0.0513205	0.344787	0.0724687	0.537758	0.435608	0.023147	0.999991	0.80113	2.30811e-05	0.000115861	0.705	0.954	0.907	0.927	1.239	1
13603	NM_010098	Opn3	0.656641	0.00794544	0.0817932	0.214619	0.391035	0.901057	0.0825531	0.743033	0.999991	1.08039	1.07447e-05	5.81186e-05	1.18	1.748	1.393	1.226	2.567	0
18390	NM_001039652	Oprm1	-1.03174	0.0043948	0.0524432	-0.569674	0.108145	0.631956	-0.570558	0.108638	0.999991	-1.33158	0.000307184	0.00120507	0.403	0.162	0.26	0.248	0.135	1
109305	NM_175423	Orai1	0.437679	0.0039833	0.0486444	-0.0648021	0.671709	0.953982	-0.0955369	0.532703	0.999991	0.99526	4.80386e-11	5.58031e-10	8.812	10.963	8.444	7.998	17.54	1
269999	NM_198424	Orai3	0.572969	1.16637e-05	0.000378208	-0.179358	0.173787	0.752876	-0.306967	0.0203185	0.999991	1.05386	5.88548e-16	1.07618e-14	11.352	15.515	10.032	8.892	23.482	1
20409	NM_017375	Ostf1	0.568131	0.000438232	0.00850695	0.271024	0.093781	0.595844	-0.0815031	0.614869	0.999991	1.69843	6.12029e-26	2.2333e-24	28.961	39.487	35.09	26.518	94.598	1
71198	NM_027715	Otud1	-0.847121	0.00575803	0.0642549	0.52372	0.0818626	0.5665	0.155491	0.60702	0.999991	0.0329314	0.913336	0.947421	1.47	0.708	2.188	1.601	1.495	1
432940	NM_001013792	Otulin	0.430766	0.00501477	0.0583849	-0.0253252	0.869328	0.982928	0.0429582	0.780208	0.999991	0.785666	2.96277e-07	2.1651e-06	20.868	25.826	20.508	20.945	35.882	1
170719	NM_001130165	Oxr1	-0.386811	0.00292698	0.0380457	-0.0715722	0.581232	0.940247	-0.0154123	0.905459	0.999991	-0.729515	2.20218e-08	1.89594e-07	21.124	14.994	19.761	19.915	12.651	1
70839	NM_027571	P2ry12	2.2866	7.47511e-07	3.22793e-05	0.766777	0.119096	0.656157	-0.271757	0.606307	0.999991	4.49173	8.40706e-24	2.65715e-22	0.017	0.193	0.052	0.007	1.136	1
74191	NM_028808	P2ry13	3.95631	4.49223e-37	3.09208e-34	-1.57701	1.63476e-05	0.00104787	-0.984809	0.00502203	0.720741	4.34125	2.25292e-44	2.21671e-42	0.302	5.358	0.072	0.124	7.676	1
140795	NM_133200	P2ry14	1.09513	6.86903e-08	3.79627e-06	-0.444946	0.0318338	0.345062	-0.456219	0.0280305	0.999991	2.07317	9.81116e-25	3.30976e-23	3.918	8.028	2.994	2.747	17.929	1
18442	NM_008773	P2ry2	1.88343	4.72595e-06	0.000167325	-0.447721	0.292586	0.858045	-0.105886	0.802146	0.999991	3.70492	1.29921e-19	3.09006e-18	0.231	0.983	0.157	0.204	4.363	0
18813	NM_011119	Pa2g4	0.374514	0.00242362	0.0332435	0.00451654	0.970835	0.995097	0.0893738	0.46938	0.999991	-1.01457	2.40851e-16	4.56045e-15	135.986	161.668	136.651	141.067	66.083	1
18458	NM_008774	Pabpc1	0.49943	3.71589e-05	0.00101865	0.0157986	0.896205	0.986529	-0.0378754	0.754475	0.999991	0.101663	0.401191	0.548935	490.788	636.398	498.342	465.672	520.525	1
18600	NM_008812	Padi2	0.975859	3.62312e-17	6.94493e-15	-0.365918	0.00175226	0.0460129	-0.640609	4.87943e-08	9.22105e-05	0.660601	1.24488e-08	1.1016e-07	9.813	17.749	7.611	6.078	15.371	1
242726	NM_153106	Padi6	2.3627	5.40036e-09	3.61848e-07	1.25175	0.00230916	0.0561907	0.679229	0.102989	0.999991	-1.80163	0.000125854	0.000536455	0.166	1.031	0.473	0.291	0.016	1
94212	NM_001195031	Pag1	-0.587054	0.00702488	0.074338	-0.1402	0.519645	0.929885	0.0460608	0.832457	0.999991	-1.70811	4.62127e-15	7.83483e-14	39.03	23.425	35.7	39.142	11.343	1
18479	NM_011035	Pak1	1.80104	8.67028e-35	5.70844e-32	-0.380309	0.0107919	0.176876	0.24004	0.104951	0.999991	3.96389	7.74106e-163	2.5592e-159	5.928	19.264	4.55	6.836	95.268	1
214230	NM_001033254	Pak6	-1.5719	1.02522e-07	5.33501e-06	-0.158609	0.584254	0.940731	0.340255	0.239061	0.999991	-4.00829	5.80001e-34	3.10273e-32	1.782	0.506	1.589	2.233	0.074	1
27355	NM_013753	Pald1	0.957907	0.0103047	0.0987621	0.508955	0.180071	0.762004	0.11567	0.765637	0.999991	4.43176	1.71918e-35	1.00064e-33	0.078	0.16	0.122	0.081	2.388	1
18483	NM_023128	Palm	0.356509	0.00614228	0.0676675	-0.119451	0.359202	0.892367	0.190955	0.142438	0.999991	-0.24015	0.0654122	0.129477	40.385	47.284	37.383	44.974	33.526	0
212503	NM_153783	Paox	0.639644	2.63404e-07	1.28735e-05	-0.0274362	0.826534	0.979392	0.0885079	0.479323	0.999991	0.707822	1.20735e-08	1.07011e-07	14.067	20.121	13.835	14.534	22.79	1
23972	NM_011864	Papss2	-1.02255	0.00855406	0.0859739	0.361889	0.350895	0.889087	-0.0279377	0.942622	0.999991	-1.15442	0.0030063	0.00907325	4.628	1.884	6.157	4.358	1.863	1
231474	NM_198422	Paqr3	1.20602	0.000295129	0.00603939	-0.158591	0.653131	0.951267	0.0506799	0.884893	0.999991	1.37206	3.57761e-05	0.000171913	0.372	0.873	0.328	0.376	1.07	1
214424	NM_177460	Parp16	-0.770637	0.00235495	0.0324782	0.0139314	0.956009	0.995097	-0.0481764	0.848782	0.999991	-1.85727	3.74964e-13	5.26606e-12	9.149	4.774	9.279	8.569	2.333	1
64099	NM_022321	Parvg	0.553919	1.10471e-06	4.57065e-05	-0.428046	0.000169609	0.00726804	-0.0736841	0.517243	0.999991	0.459491	5.3215e-05	0.000247438	125.773	169.269	93.574	116.221	170.969	1
18504	NM_011037	Pax2	-1.3601	0.00187859	0.0270671	-1.09998	0.0108762	0.177827	0.453202	0.270824	0.999991	-2.35332	4.54233e-07	3.21012e-06	0.232	0.064	0.091	0.318	0.02	1
229534	NM_146131	Pbxip1	-0.804932	9.97781e-05	0.00239452	-0.192937	0.35016	0.888794	0.101323	0.623516	0.999991	0.747377	0.000289355	0.00114127	12.915	6.636	11.295	13.421	21.728	1
110821	NM_144844	Pcca	0.378649	0.00734047	0.0769783	-0.136764	0.335431	0.880483	0.00253376	0.985751	0.999991	0.349077	0.0134967	0.0335136	9.029	10.768	8.247	8.788	11.393	1
319263	NM_183028	Pcmtd1	-1.07714	2.23095e-09	1.57132e-07	-0.352678	0.0497966	0.441323	0.271113	0.131192	0.999991	-1.61367	3.95165e-19	9.09761e-18	18.882	8.036	14.766	22.122	5.939	1
18569	NM_001168491	Pdcd4	-0.579286	4.5102e-07	2.04485e-05	-0.207144	0.070317	0.528326	0.122498	0.28367	0.999991	-0.428031	0.00018951	0.000775396	31.362	18.952	26.255	33.731	22.941	1
241489	NM_001081033	Pde11a	-0.986366	0.00828261	0.0838393	-0.872305	0.0193212	0.259804	-0.0731156	0.843158	0.999991	-2.76074	2.50648e-12	3.29087e-11	1.101	0.466	0.565	1.006	0.11	1
18578	NM_001177980	Pde4b	-0.561676	0.00861466	0.086392	0.081976	0.700885	0.958647	-0.00745442	0.972147	0.999991	-0.0454732	0.831327	0.896063	11.397	6.908	12.34	10.907	10.853	1
238871	NM_011056	Pde4d	-0.871633	0.000241001	0.00508284	-0.377305	0.11152	0.640264	0.0107258	0.963894	0.999991	-2.02018	2.61637e-17	5.33275e-16	7.101	3.456	5.427	6.947	1.623	1
216134	NM_172134	Pdxk	0.639671	1.45349e-05	0.000457278	-1.17424	2.84651e-15	2.50524e-12	-0.431709	0.0035552	0.610776	0.767042	1.99275e-07	1.49864e-06	13.914	19.952	6.117	9.997	23.547	1
68070	NM_001081064	Pdzd2	-0.824771	0.00188255	0.0270983	-1.07906	4.83278e-05	0.00259937	-0.234204	0.376926	0.999991	-2.08527	5.38993e-15	9.07286e-14	3.408	1.707	1.568	2.805	0.733	1
73182	NM_028460	Pear1	-1.36387	6.29298e-06	0.000217072	1.60777	2.58152e-08	3.83491e-06	0.829421	0.00428584	0.674195	-0.0840493	0.774463	0.857574	0.789	0.253	2.606	1.405	0.741	0
18624	NM_008820	Pepd	0.641055	1.93031e-08	1.15995e-06	0.0362945	0.752407	0.971358	0.182041	0.113157	0.999991	0.51509	6.60111e-06	3.73048e-05	12.782	18.295	13.112	14.08	18.09	1
64934	NM_022889	Pes1	0.372908	0.000920503	0.0155225	0.00839372	0.940611	0.993766	0.0339996	0.762862	0.999991	0.0914066	0.417091	0.562313	39.614	46.989	39.979	39.497	41.705	1
18637	NM_011070	Pfdn2	0.299332	0.00770756	0.0798874	0.10311	0.359681	0.892367	0.0826003	0.463563	0.999991	-0.176557	0.118172	0.212741	56.276	63.412	60.515	57.984	49.12	0
270198	NM_173019	Pfkfb4	0.545653	0.00159499	0.024153	-0.0923555	0.596766	0.942714	-0.32146	0.0672583	0.999991	1.38907	5.52086e-16	1.014e-14	2.758	3.711	2.586	2.116	7.283	1
18643	NM_011072	Pfn1	0.527077	1.93456e-05	0.000582407	0.132766	0.281922	0.850598	0.0169104	0.890999	0.999991	0.998709	5.67246e-16	1.03953e-14	908.933	1201.2	996.997	894.739	1806.03	1
56012	NM_018870	Pgam2	1.31975	1.33318e-17	2.80394e-15	-0.87124	2.01232e-07	2.3424e-05	-0.467349	0.00444083	0.679899	0.416685	0.00834544	0.02215	5.488	12.755	2.953	3.801	7.295	1
18654	NM_008827	Pgf	1.83915	4.02003e-07	1.87887e-05	0.91349	0.012262	0.193783	0.865694	0.0177258	0.999991	1.71809	2.22876e-06	1.40028e-05	1.207	4.375	2.473	2.249	4.538	1
21946	NM_009402	Pglyrp1	1.97731	4.21675e-07	1.94086e-05	0.755743	0.0590846	0.483792	-0.198772	0.632727	0.999991	4.5276	5.40161e-32	2.58808e-30	0.501	2.37	0.967	0.397	17.8	1
57757	NM_001271476	Pglyrp2	0.436623	0.00893046	0.0885724	-1.08754	9.09726e-11	2.48946e-08	-0.248714	0.13708	0.999991	0.771261	3.81928e-06	2.28411e-05	26.587	33.092	12.354	21.655	45.236	1
53328	NM_016783	Pgrmc1	0.691972	0.00018404	0.00405665	-0.23014	0.214315	0.789501	0.00882825	0.961992	0.999991	0.110217	0.551765	0.68525	37.274	55.638	31.82	36.5	39.835	1
215789	NM_001195065	Phactr2	1.23749	4.68498e-06	0.000166929	-0.134294	0.62573	0.947856	-0.194068	0.48213	0.999991	2.11542	3.58661e-15	6.15645e-14	0.353	0.801	0.322	0.297	1.642	1
241915	NM_153421	Phc3	-0.618594	0.00456727	0.0541599	-0.538649	0.0135188	0.205386	-0.11545	0.596409	0.999991	-0.980165	7.08754e-06	3.98223e-05	10.436	6.126	7.163	9.25	5.105	0
236539	NM_016966	Phgdh	0.405506	0.0029808	0.0385468	0.0315414	0.817363	0.979392	0.146392	0.283776	0.999991	-1.45528	2.05268e-26	7.59079e-25	205.258	249.456	210.017	221.001	73.136	1
74116	NM_023734	Pi16	2.54279	1.00807e-10	9.11381e-09	1.47172	0.000265207	0.0106017	-0.0597228	0.891217	0.999991	2.91086	1.00275e-13	1.50139e-12	0.072	0.58	0.275	0.065	0.831	1
98496	NM_001003948	Pid1	1.32483	1.84021e-05	0.000556215	-0.0210331	0.949579	0.995	-0.0540316	0.871929	0.999991	4.39588	1.7588e-50	2.18594e-48	0.156	0.406	0.154	0.144	4.123	1
83490	NM_031376	Pik3ap1	3.71532	9.42148e-48	8.39232e-45	0.661725	0.0125579	0.19627	-0.609676	0.029395	0.999991	5.3447	1.68285e-97	7.72707e-95	0.534	7.417	0.884	0.319	25.872	1
216505	NM_178149	Pik3ip1	-0.524016	0.00107767	0.0176806	-0.084996	0.595512	0.941687	0.128925	0.420554	0.999991	-1.43244	5.36013e-19	1.2238e-17	45.86	28.965	43.17	48.479	16.479	1
18709	NM_008841	Pik3r2	0.505874	0.0091367	0.0899591	0.361909	0.0622501	0.499953	0.114302	0.556222	0.999991	0.11754	0.545043	0.679608	16.632	21.772	21.594	17.616	17.904	0
104709	NM_001004435	Pik3r6	3.06687	4.34707e-14	6.03924e-12	0.107688	0.797882	0.979392	-0.361806	0.397168	0.999991	5.91879	1.53647e-48	1.76374e-46	0.144	1.628	0.159	0.098	15.527	0
170741	NM_133209	Pilrb1	3.15872	8.74226e-18	1.91861e-15	-0.67418	0.116608	0.650562	0.190238	0.638696	0.999991	7.0479	2.14005e-84	8.22676e-82	0.19	2.376	0.083	0.219	44.988	1
545812	NM_001024932	Pilrb2	2.93263	1.06299e-10	9.46873e-09	0.0377186	0.93839	0.992811	-0.0730019	0.88209	0.999991	6.96336	1.85517e-54	2.62102e-52	0.051	0.786	0.055	0.043	18.839	1
23988	NM_023371	Pin1	0.32817	0.00344324	0.0433424	0.153594	0.171505	0.750214	0.12012	0.285287	0.999991	-0.426611	0.000158665	0.000661137	13.493	15.515	15.023	14.255	9.889	1
72400	NM_028228	Pinx1	0.489381	0.000482715	0.00920624	-0.0493495	0.72718	0.965225	0.00857034	0.9517	0.999991	-0.118385	0.403523	0.550941	10.325	13.323	9.969	10.111	9.381	1
18718	NM_008845	Pip4k2a	1.19481	6.69279e-13	7.85651e-11	-0.384444	0.0211991	0.275324	-0.00892377	0.957301	0.999991	3.15017	3.10714e-80	1.00708e-77	19.841	42.165	15.165	19.14	181.23	1
18722	NM_011087	Pira1	4.61913	2.86209e-59	7.22344e-56	-0.110368	0.746193	0.971069	-0.300691	0.390542	0.999991	7.85847	9.27755e-171	3.83395e-167	0.079	2.43	0.071	0.056	26.395	0
18724	NM_011088	Pira11	4.71048	2.71239e-57	5.86767e-54	-0.125395	0.72542	0.96442	-0.313202	0.393051	0.999991	7.86243	7.96685e-159	2.19487e-155	0.107	3.685	0.095	0.073	37.649	0
18725	NM_011089	Pira2	4.57758	2.06548e-48	1.95485e-45	0.196176	0.582215	0.940247	-0.368791	0.327585	0.999991	7.85305	7.21278e-141	6.62374e-138	0.069	2.22	0.084	0.044	25.365	1
18727	NM_011091	Pira4	4.72714	3.90856e-53	5.38067e-50	0.0888044	0.806503	0.979392	-0.198567	0.596534	0.999991	7.91212	9.09913e-148	1.15699e-144	0.095	3.456	0.104	0.072	36.462	1
18729	NM_001289428	Pira6	4.76791	2.17384e-54	3.6576e-51	-0.208571	0.573956	0.937661	-0.286567	0.44651	0.999991	7.88771	9.0617e-148	1.15699e-144	0.061	2.259	0.049	0.043	22.745	1
18730	NM_011094	Pira7	4.72841	4.27336e-53	5.39263e-50	0.088907	0.806397	0.979392	-0.292219	0.44062	0.999991	7.90792	2.0165e-147	2.38091e-144	0.093	3.403	0.103	0.064	35.764	0
18733	NM_011095	Pirb	5.00482	1.12529e-63	4.26008e-60	-0.178154	0.592798	0.94145	-0.682888	0.0499316	0.999991	7.77768	4.69771e-152	7.76531e-149	0.17	6.772	0.146	0.085	54.187	1
18738	NM_008850	Pitpna	0.345417	0.00443862	0.0527997	-0.306108	0.0118037	0.188834	0.0720993	0.552851	0.999991	0.653778	7.14791e-08	5.73011e-07	45.047	52.401	36.442	46.148	70.327	1
71795	NM_145823	Pitpnc1	-0.673316	0.00048871	0.00930886	-0.436229	0.0238321	0.295731	-0.0644116	0.738537	0.999991	-1.37045	1.37075e-12	1.83916e-11	22.102	12.506	16.302	20.435	8.219	1
19679	NM_011256	Pitpnm2	-0.822749	2.07543e-06	7.99702e-05	0.817708	2.28376e-06	0.000204725	0.363831	0.0355422	0.999991	-2.31297	3.55413e-40	2.67045e-38	20.578	10.516	36.981	25.787	3.954	1
57746	NM_021308	Piwil2	0.752911	0.00425085	0.0511917	-1.69868	4.2453e-09	7.69979e-07	-1.87319	1.98521e-10	4.8235e-07	0.801473	0.00233146	0.00727699	0.476	0.755	0.131	0.11	0.843	1
18768	NM_008863	Pkib	2.43982	1.11746e-10	9.89576e-09	-0.872026	0.0353439	0.36753	-0.575498	0.159611	0.999991	4.03965	4.82868e-27	1.84337e-25	0.085	0.545	0.038	0.05	1.923	1
18769	NM_001039390	Pkig	0.849027	1.86694e-07	9.2692e-06	0.487217	0.0028466	0.0665824	0.219528	0.180043	0.999991	0.752036	3.96481e-06	2.36515e-05	17.262	28.579	24.257	19.773	29.139	1
227937	NM_026361	Pkp4	-0.431037	0.00832838	0.0841623	0.153475	0.345863	0.88746	0.071646	0.660146	0.999991	-0.874046	9.85444e-08	7.74579e-07	8.054	5.42	9.031	8.218	4.279	1
18783	NM_008869	Pla2g4a	1.06823	0.000142382	0.00322287	-0.268692	0.34064	0.882997	-0.273625	0.332028	0.999991	1.47717	1.41302e-07	1.0879e-06	4.86	9.725	4.011	3.854	14.192	1
231507	NM_139198	Plac8	0.98156	1.97757e-08	1.18365e-06	-0.939565	7.95204e-08	1.06014e-05	-0.867036	7.27722e-07	0.000952085	0.88251	4.48162e-07	3.16993e-06	470.528	861.299	241.456	246.961	864.678	1
665270	NM_001081407	Plb1	1.21878	0.0027676	0.0366166	-0.907459	0.0335666	0.356632	-0.176501	0.67286	0.999991	3.28862	3.00353e-16	5.62907e-15	0.397	0.44	0.191	0.334	1.672	1
104759	NM_178911	Pld4	0.530474	0.0010333	0.017045	-1.43046	1.10282e-18	1.91132e-15	-0.847632	1.65391e-07	0.000255724	1.09164	1.43405e-11	1.74428e-10	104.957	139.687	38.289	55.853	224.076	1
56193	NM_019549	Plek	1.29438	0.000135082	0.00308852	-0.424796	0.216708	0.791247	-0.833192	0.016191	0.999991	3.74901	1.09609e-28	4.62201e-27	0.724	1.774	0.517	0.356	12.031	1
101476	NM_133942	Plekha1	0.995395	7.39235e-08	4.01227e-06	-0.184618	0.322896	0.873763	0.0290786	0.876074	0.999991	2.51791	1.32677e-42	1.1728e-40	4.087	7.579	3.607	4.061	24.113	1
78670	NM_023900	Plekhj1	0.393215	0.000232554	0.00493908	0.2656	0.0130284	0.200807	0.129179	0.228269	0.999991	0.370661	0.000524428	0.00194411	29.491	35.504	35.493	31.264	37.726	1
84094	NM_032398	Plvap	1.36718	4.86806e-09	3.29094e-07	0.850958	0.000364106	0.0138556	-0.457778	0.0818554	0.999991	2.77741	1.08938e-34	6.06311e-33	0.445	1.116	0.84	0.301	3.315	1
54712	NM_018797	Plxnc1	2.858	9.83253e-35	6.20392e-32	-0.704484	0.00309479	0.0710936	-0.369131	0.119554	0.999991	5.4371	2.03151e-121	1.3992e-118	1.029	7.392	0.618	0.775	50.827	1
67784	NM_026376	Plxnd1	1.4533	1.90398e-13	2.34406e-11	0.424424	0.0319763	0.346125	0.244524	0.216863	0.999991	3.13498	8.32942e-57	1.25169e-54	6.277	16.161	8.566	7.28	57.879	1
56523	NM_019938	Pmfbp1	1.82023	2.51006e-05	0.000728839	-0.531965	0.272612	0.841354	-0.403162	0.403666	0.999991	1.43721	0.00101536	0.00348504	0.039	0.179	0.02	0.023	0.142	0
68603	NM_026784	Pmvk	0.421897	0.00238779	0.0328413	0.0434937	0.755761	0.971402	0.0698978	0.617472	0.999991	0.722043	1.8101e-07	1.36688e-06	11.048	13.596	11.386	11.308	18.109	1
66249	NM_025443	Pno1	0.428591	0.00657396	0.0708904	-0.110878	0.483279	0.921147	0.0657299	0.677518	0.999991	-0.410189	0.00966991	0.0251762	22.124	27.345	20.534	22.61	16.364	0
18975	NM_017462	Polg	-0.618339	0.00414006	0.0501143	-0.170695	0.428059	0.908793	-0.0846834	0.69418	0.999991	-0.894581	3.41753e-05	0.000165038	10.72	6.289	9.539	9.8	5.585	1
64424	NM_022811	Polr1e	1.22751	5.48228e-24	2.11456e-21	-0.19201	0.119758	0.657972	-0.224648	0.0692262	0.999991	0.298129	0.0150196	0.0367977	6.621	14.301	5.805	5.51	8.038	1
66420	NM_025554	Polr2e	0.342322	0.00557742	0.062655	0.0732952	0.553445	0.93664	0.0802407	0.516653	0.999991	-0.00244613	0.98423	0.997873	57.112	66.357	60.118	58.67	56.284	1
245841	NM_145632	Polr2h	0.431357	0.00131135	0.0205566	0.124694	0.354713	0.889955	0.0819147	0.543845	0.999991	-0.277422	0.0408085	0.0870743	25.209	31.193	27.492	25.961	20.465	1
66491	NM_025593	Polr2l	0.561874	0.00325615	0.0414004	0.255507	0.181249	0.762936	0.110178	0.564559	0.999991	0.0639125	0.738247	0.832416	22.066	30.068	26.379	23.215	22.815	0
18987	NM_011138	Pou2f2	1.09341	0.000195921	0.0042627	-0.120309	0.685821	0.955565	0.432161	0.143638	0.999991	3.41023	1.14842e-31	5.39301e-30	0.972	2.013	0.882	1.294	11.836	1
235036	NM_145610	Ppan	0.336167	0.00775288	0.0802307	0.226367	0.0731265	0.538855	0.0347705	0.78341	0.999991	-0.538747	2.2004e-05	0.000110993	35.095	40.643	41.156	34.81	23.807	1
19016	NM_001127330	Pparg	1.43482	0.00073327	0.0130327	0.193088	0.650126	0.951267	-0.414434	0.331206	0.999991	0.851497	0.0452257	0.0949546	3.286	9.726	3.84	2.251	6.638	1
68507	NM_001144855	Ppfia4	1.62767	0.000270799	0.00560205	0.0450373	0.921775	0.990275	0.317055	0.487307	0.999991	6.08648	2.35619e-43	2.17586e-41	0.054	0.211	0.057	0.072	7.681	0
19024	NM_008905	Ppfibp2	1.08293	0.0033991	0.0428938	0.357635	0.34856	0.888372	-1.02875	0.015086	0.999991	4.48184	3.13918e-37	2.04294e-35	0.083	0.19	0.115	0.026	2.624	1
56031	NM_019489	Ppie	0.397197	0.00175763	0.0257031	0.0672452	0.597091	0.942779	0.121215	0.34074	0.999991	0.0924569	0.467371	0.609806	39.975	48.286	41.84	42.265	42.104	1
105675	NM_134084	Ppif	0.291956	0.00323954	0.0412585	-0.004644	0.962858	0.995097	0.0648901	0.515274	0.999991	-0.366219	0.000273973	0.00108629	16.79	18.82	16.768	17.061	12.837	1
319468	NM_001110218	Ppm1h	-0.571157	9.43377e-05	0.00228569	0.415314	0.00445362	0.093413	0.0685436	0.638985	0.999991	-1.41867	3.99281e-22	1.13992e-20	23.823	14.572	32.134	24.29	8.666	1
67905	NM_026447	Ppm1m	0.846134	1.81847e-06	7.13397e-05	-0.0809949	0.649338	0.95087	-0.386722	0.0304264	0.999991	2.36941	5.24005e-41	4.12467e-39	13.381	22.272	12.659	9.862	70.772	1
68458	NM_026731	Ppp1r14a	1.42275	0.000761721	0.0133969	0.198631	0.648838	0.950855	-0.220054	0.620801	0.999991	4.45734	3.55441e-27	1.37277e-25	0.528	1.678	0.637	0.409	19.192	1
228852	NM_001159662	Ppp1r16b	-0.956018	2.33325e-08	1.3748e-06	0.0118332	0.944762	0.994322	0.155926	0.361194	0.999991	-1.1303	4.13969e-11	4.83939e-10	16.699	7.755	16.947	18.069	7.382	1
59032	NM_021529	Ppp2r3c	0.455734	0.00013698	0.00311923	0.0554966	0.643901	0.950527	0.0515063	0.668232	0.999991	0.151277	0.207248	0.334031	11.237	14.125	11.701	11.33	12.325	1
110854	NM_138748	Ppp2r4	0.347949	0.010107	0.0973604	-0.0642931	0.634822	0.947963	0.120443	0.373503	0.999991	0.532076	8.35082e-05	0.000371131	60.975	71.149	58.31	64.647	87.604	1
100043911	NR_027957	Ppp4r1l-ps	-0.618848	0.00802798	0.0822515	0.170884	0.457932	0.916685	0.19484	0.397689	0.999991	-0.00704007	0.975677	0.991451	1.306	0.764	1.482	1.444	1.283	0
19063	NM_008917	Ppt1	-0.532694	5.91553e-06	0.000206403	-0.46574	7.47092e-05	0.0037559	0.167238	0.154467	0.999991	-1.6191	9.42569e-43	8.3767e-41	83.2	52.392	60.269	90.667	26.493	1
66943	NM_001164420	Pqlc1	0.989256	1.44948e-09	1.07595e-07	-0.0532222	0.748459	0.971358	-0.0646468	0.697386	0.999991	1.97636	4.41111e-34	2.39067e-32	4.906	9.006	4.83	4.681	19.354	1
277360	NM_177782	Prex1	0.521253	0.00638755	0.0696376	-0.0393817	0.83681	0.979392	0.177565	0.352992	0.999991	1.38831	3.70552e-13	5.20852e-12	29.398	38.906	28.842	32.42	77.871	1
18646	NM_011073	Prf1	-1.57342	1.25578e-05	0.000401188	2.65235	1.64847e-16	1.97791e-13	0.532535	0.106932	0.999991	-1.19894	0.000668219	0.00240646	0.549	0.135	4.018	0.789	0.204	1
53856	NM_016914	Prg3	1.75915	0.0022015	0.0307824	0.977511	0.0941814	0.596928	0.0251893	0.966418	0.999991	1.89004	0.000982497	0.003387	0	0.184	0.081	0	0.227	1
106042	NM_001033217	Prickle1	-0.644743	0.000198013	0.00429585	-0.0966303	0.575184	0.937752	0.022604	0.895663	0.999991	-2.43432	8.03966e-42	6.81516e-40	6.214	3.598	5.844	6.141	1.084	1
18753	NM_011103	Prkcd	0.850722	4.05209e-08	2.3155e-06	-0.310747	0.0455486	0.421178	-0.113974	0.463148	0.999991	1.38846	3.1421e-19	7.28457e-18	28.848	48.026	23.273	25.819	75.658	1
18752	NM_011102	Prkcg	1.55883	0.000759765	0.0133781	-0.0959714	0.842457	0.979392	-0.334902	0.493308	0.999991	3.65349	9.50359e-16	1.70941e-14	0.069	0.273	0.065	0.046	1.585	1
18755	NM_008856	Prkch	-0.625423	2.00634e-05	0.00059807	-0.398529	0.00656244	0.122003	-0.0699166	0.633318	0.999991	-0.640212	1.27312e-05	6.77517e-05	56.329	33.147	42.748	51.951	35.386	1
101540	NM_178900	Prkd2	-0.652456	7.35789e-05	0.00186011	0.358387	0.0288545	0.32747	0.10936	0.505223	0.999991	0.0841274	0.608237	0.73404	17.453	10.187	22.676	18.409	18.433	1
15469	NM_019830	Prmt1	0.463402	1.05475e-06	4.37593e-05	0.0873936	0.35778	0.891085	0.111539	0.240596	0.999991	-0.572207	1.91425e-09	1.87678e-08	138.793	175.193	147.69	145.57	91.918	0
214572	NM_145404	Prmt7	0.373059	0.00798316	0.0820397	0.265586	0.0591208	0.483792	0.18227	0.195705	0.999991	-0.668175	2.50821e-06	1.55809e-05	15.283	18.168	18.462	16.901	9.45	0
381148	NM_001270646	Prob1	-0.794945	0.00363361	0.0452871	-0.0652987	0.809326	0.979392	0.037785	0.88892	0.999991	-1.85365	4.0557e-11	4.74457e-10	1.235	0.63	1.187	1.228	0.308	0
67939	NM_001163454	Prorsd1	0.752363	1.31683e-06	5.3604e-05	0.241908	0.123538	0.669274	-0.0791412	0.617919	0.999991	0.87535	1.73626e-08	1.51613e-07	3.72	5.772	4.419	3.411	6.777	1
333193	NM_183321	Proser3	-0.48239	0.00294327	0.0382246	0.126491	0.429917	0.909884	0.0253137	0.874859	0.999991	-0.580645	0.000359797	0.00138765	4.514	2.936	4.945	4.446	2.96	0
19132	NM_013639	Prph	1.43038	0.00933936	0.0914426	0.508402	0.367556	0.893836	0.123373	0.829394	0.999991	2.59056	1.57576e-06	1.01549e-05	0.013	0.107	0.039	0.017	0.329	1
212627	NM_144806	Prpsap2	0.285676	0.0025378	0.0342818	0.00233662	0.980424	0.995097	0.0269727	0.777232	0.999991	0.507975	7.13972e-08	5.72632e-07	13.423	15.169	13.573	13.349	18.918	1
228413	NM_178695	Prrg4	-1.09115	0.000317854	0.00641768	0.549245	0.0683273	0.522077	0.187762	0.533588	0.999991	-3.00592	3.34292e-22	9.61018e-21	5.922	2.402	8.991	6.568	0.606	1
22072	NM_009430	Prss2	2.8724	6.94564e-12	7.15496e-10	-0.426364	0.320453	0.872945	0.12012	0.777972	0.999991	2.34621	2.21013e-08	1.90179e-07	1.223	11.348	0.845	1.282	8.053	1
19152	NM_011178	Prtn3	1.72725	7.98919e-05	0.00199637	0.719193	0.110064	0.635374	-0.967638	0.0496542	0.999991	2.90614	1.49099e-11	1.80955e-10	0.176	0.756	0.355	0.04	2.072	1
26440	NM_011965	Psma1	0.652979	1.39918e-08	8.82946e-07	0.0533146	0.643752	0.950436	0.0442413	0.701241	0.999991	0.233953	0.0423209	0.0898144	90.879	131.119	94.414	91.304	105.727	1
19167	NM_011184	Psma3	0.317298	0.000999556	0.0165786	-0.0150342	0.876286	0.983322	0.0488375	0.613074	0.999991	-0.123178	0.202456	0.327655	47.728	54.434	47.244	47.936	43.218	0
26444	NM_001289476	Psma7	0.345941	0.00717878	0.0756494	0.0549072	0.669775	0.953982	0.112713	0.381359	0.999991	-0.23113	0.0728483	0.141882	146.139	170.545	151.374	153.394	122.063	0
19175	NM_008946	Psmb6	0.383721	0.00764813	0.0796531	0.206064	0.152199	0.72268	0.124398	0.387557	0.999991	-0.10542	0.464236	0.606818	95.913	114.85	110.678	101.561	87.871	1
23997	NM_011875	Psmd13	0.380513	0.000317579	0.00641768	0.119786	0.257507	0.831258	0.0940562	0.374162	0.999991	-0.0318627	0.763453	0.850225	66.794	79.657	72.665	69.345	64.518	0
59029	NM_021526	Psmd14	0.363917	0.000731209	0.013012	0.0445791	0.679488	0.954969	0.0386762	0.72011	0.999991	-0.147828	0.17116	0.286363	58.644	69.075	60.572	58.468	52.194	1
69666	NM_001101430	Psmg4	0.597547	0.000521226	0.00981707	0.26244	0.128618	0.677305	-0.374394	0.0315854	0.999991	0.140443	0.416783	0.561944	27.483	38.392	33.091	20.487	29.922	1
19201	NM_013831	Pstpip2	0.669747	0.00820276	0.0832536	-1.24596	1.14672e-05	0.000774309	0.307172	0.233035	0.999991	4.17982	5.92761e-67	1.28926e-64	0.566	0.853	0.213	0.693	11.544	1
19204	NM_001081211	Ptafr	1.62065	0.00167392	0.0248512	-0.526583	0.318094	0.872945	0.054085	0.917663	0.999991	4.64828	1.15874e-19	2.76392e-18	0.08	0.361	0.042	0.078	4.88	1
19212	NM_008961	Pter	0.618065	0.00488918	0.0572598	-0.352544	0.114356	0.646337	-0.24411	0.27387	0.999991	0.421023	0.0559506	0.113488	1.456	2.076	1.134	1.191	1.953	0
56351	NM_019766	Ptges3	0.445226	0.00111482	0.0181524	-0.0275928	0.839987	0.979392	0.0696466	0.610291	0.999991	-0.581655	2.11905e-05	0.000107448	102.933	128.545	101.16	105.122	67.551	0
102639566	NR_110420	Ptgs2os2	1.47394	0.00523076	0.0601438	-0.959628	0.0917367	0.591041	-0.919879	0.106348	0.999991	2.15605	3.66574e-05	0.000175688	0.044	0.195	0	0	0.376	1
69202	NM_026988	Ptms	0.752018	0.00314507	0.040191	0.418724	0.10019	0.614463	0.171875	0.499937	0.999991	2.17247	1.38522e-17	2.86578e-16	53.47	84.557	72.59	59.017	256.464	1
66461	NM_025576	Ptpmt1	0.401696	0.000959647	0.016093	0.250968	0.0397306	0.393446	0.0934655	0.446198	0.999991	0.164155	0.17969	0.297474	10.267	12.437	12.266	10.645	11.363	0
545622	NM_011207	Ptpn3	0.781956	2.10162e-05	0.000621579	-0.26904	0.14695	0.712725	0.0456911	0.804922	0.999991	1.52646	7.96489e-17	1.56924e-15	2.271	3.619	1.887	2.278	6.626	1
15170	NM_013545	Ptpn6	0.818371	2.97901e-10	2.46509e-08	-1.15501	8.52473e-19	1.89955e-15	-0.202007	0.120556	0.999991	1.64371	9.67616e-37	6.10485e-35	77.375	125.538	34.46	65.177	241.651	1
19267	NM_011212	Ptpre	0.630854	0.00292603	0.0380457	-0.742227	0.000488337	0.0172723	0.000593017	0.997772	0.999991	1.5967	4.71182e-14	7.27099e-13	7.485	10.745	4.412	7.252	23.158	1
19268	NM_011213	Ptprf	-0.682996	0.00770627	0.0798874	-0.404142	0.114821	0.647265	0.277426	0.278971	0.999991	-3.6734	3.04442e-46	3.24672e-44	39.845	22.211	29.961	47.633	2.713	1
19277	NM_011216	Ptpro	1.62002	0.00526302	0.0603772	0.806578	0.166167	0.744708	0.560049	0.337224	0.999991	4.07031	1.939e-12	2.56413e-11	0.017	0.143	0.056	0.034	1.733	1
329384	NM_178595	Ptrh1	-0.73221	0.00205101	0.029081	1.26439	7.52987e-08	1.01251e-05	0.354362	0.133046	0.999991	-1.85561	1.49788e-14	2.43222e-13	16.237	8.735	40.306	20.304	4.169	0
433813	NM_001033490	Pusl1	0.328637	0.00978751	0.0947649	0.37108	0.00350176	0.0776198	0.252602	0.0479452	0.999991	-0.226966	0.079632	0.152814	8.411	9.691	10.927	9.728	7.077	0
66824	NM_023258	Pycard	0.4516	0.00230016	0.0318969	-0.109652	0.460461	0.917159	-0.0157442	0.915589	0.999991	1.07993	2.7762e-13	3.97665e-12	19.381	24.353	17.911	18.596	40.854	1
69051	NM_133705	Pycr2	0.377216	0.00161671	0.0243405	0.0380706	0.750989	0.971358	0.0310183	0.796127	0.999991	0.205847	0.0858111	0.162969	24.869	29.605	25.558	24.715	28.38	1
216344	NM_024454	Rab21	0.473389	0.000746691	0.0132247	-0.167817	0.233212	0.809294	0.0742574	0.597542	0.999991	0.538991	0.000123239	0.00052762	31.41	39.994	28.031	32.141	45.254	1
11891	NM_023635	Rab27a	-0.390817	0.000829101	0.0142911	-0.747709	1.67146e-10	4.07366e-08	-0.122653	0.293893	0.999991	-0.805624	5.9133e-12	7.4559e-11	63.971	44.489	38.107	57.051	35.94	1
106572	NM_133685	Rab31	0.880775	0.00897401	0.0888059	-0.310062	0.359626	0.892367	-0.835231	0.0139517	0.999991	1.20923	0.000331083	0.00128973	2.324	4.129	1.846	1.182	5.749	1
67844	NM_026405	Rab32	0.995826	2.47415e-06	9.29679e-05	-0.0882708	0.686788	0.955565	-1.8891	6.18753e-14	2.63094e-10	2.7685	5.62715e-41	4.40838e-39	1.158	2.166	1.087	0.265	8.285	1
270160	NM_175562	Rab39	1.52266	0.000712185	0.012778	-0.361653	0.464213	0.918586	-0.749018	0.141748	0.999991	4.05607	5.22735e-21	1.37374e-19	0.034	0.136	0.02	0.008	1.042	1
74760	NM_144538	Rab3il1	1.35813	0.000168384	0.00373876	0.542252	0.141419	0.705363	0.667416	0.0698079	0.999991	2.23418	3.57592e-10	3.83333e-09	0.207	0.562	0.326	0.345	1.188	1
216363	NM_001003950	Rab3ip	0.302824	0.00833114	0.0841623	-0.013495	0.907092	0.988002	0.186909	0.10489	0.999991	0.458972	6.0921e-05	0.000279199	5.752	6.503	5.708	6.354	7.838	1
19345	NM_024456	Rab5c	0.47007	5.29431e-05	0.00138946	-0.0939259	0.419815	0.907426	-0.0166692	0.886151	0.999991	0.48105	3.52577e-05	0.000169866	86.488	109.832	81.171	82.88	119.564	1
29809	NM_001038621	Rabgap1l	-0.505827	0.0100301	0.096804	0.363883	0.0631412	0.503773	0.0245198	0.900483	0.999991	-0.421189	0.0319888	0.0708433	8.198	6.965	7.737	7.657	6.39	1
19354	NM_009008	Rac2	0.269211	0.00538225	0.0613658	-0.497167	2.82924e-07	3.17486e-05	-0.0189524	0.844725	0.999991	0.15614	0.106528	0.195223	149.197	164.538	105.663	143.092	164.353	1
19365	NM_001166381	Rad52	-0.458485	0.000173747	0.00384657	-0.12677	0.292624	0.858045	0.0640878	0.593114	0.999991	-0.483818	7.73967e-05	0.00034643	6.286	4.184	5.779	6.417	4.417	1
64143	NM_022327	Ralb	1.36526	2.12669e-11	2.07771e-09	0.0423829	0.836482	0.979392	-0.147623	0.473265	0.999991	1.79271	1.31681e-18	2.91e-17	5.846	14.152	6.054	5.103	20.757	1
78255	NR_027640	Ralgps2	-0.437799	0.00652159	0.0705167	-0.0190152	0.905882	0.987694	0.186822	0.245295	0.999991	-1.91484	2.44537e-32	1.19239e-30	20.576	13.791	20.426	22.802	5.255	1
19384	NM_009391	Ran	0.315925	0.00814153	0.0829658	0.082526	0.489489	0.922134	0.0882816	0.459733	0.999991	-0.700336	4.61245e-09	4.33203e-08	218.869	249.504	232.133	226.707	132.386	1
19385	NM_011239	Ranbp1	0.498002	0.000182686	0.00403267	0.123597	0.35326	0.889451	0.0814112	0.540965	0.999991	-0.407348	0.00223688	0.00701224	257.081	333.125	279.935	265.432	190.892	0
217944	NM_175930	Rapgef5	1.72595	2.16102e-06	8.24291e-05	-0.262486	0.477675	0.920652	0.207398	0.573003	0.999991	4.15933	1.98127e-30	8.92381e-29	0.527	1.849	0.432	0.612	12.576	1
320292	NM_145839	Rasgef1b	1.12581	3.00459e-05	0.000852702	0.400652	0.145482	0.70958	0.341059	0.217409	0.999991	4.38975	5.16446e-63	9.59198e-61	0.401	0.85	0.546	0.501	9.757	1
70784	NM_001033158	Rasl12	1.69847	7.19552e-05	0.00182822	0.462227	0.293245	0.858655	-0.391798	0.390269	0.999991	4.13462	7.38909e-23	2.17721e-21	0.105	0.424	0.166	0.066	3.06	1
213391	NM_178045	Rassf4	1.56212	5.88933e-12	6.15049e-10	0.579084	0.0126346	0.196877	0.422422	0.0709937	0.999991	5.72721	4.50341e-147	4.96275e-144	0.279	0.799	0.43	0.37	16.931	1
71684	NM_001141981	Rbm43	0.351756	0.0081916	0.0831961	-0.202886	0.130025	0.678834	-0.163664	0.222206	0.999991	0.96604	2.88483e-13	4.11798e-12	10.471	12.309	9.283	9.12	20.407	1
19656	NM_009033	Rbmxl1	0.309106	0.00160256	0.0242433	-0.0121965	0.901008	0.987212	0.104947	0.284406	0.999991	-0.469253	1.78124e-06	1.13727e-05	101.03	114.809	100.542	105.958	72.043	1
19671	NM_023131	Rce1	0.254589	0.00347458	0.0436643	0.236564	0.00665323	0.122959	0.128382	0.143322	0.999991	0.0515317	0.557374	0.690504	12.568	13.736	14.859	13.308	12.873	0
59028	NM_021525	Rcl1	0.312977	0.00801657	0.0821902	-0.0389558	0.742178	0.969889	0.0234612	0.842964	0.999991	-0.58605	8.90772e-07	5.97826e-06	21.399	24.356	20.895	21.138	14.025	0
52377	NM_026555	Rcn3	1.69873	1.75503e-06	6.90295e-05	0.623538	0.0799425	0.561016	-0.0429833	0.904161	0.999991	2.7386	1.23301e-14	2.01998e-13	4.656	15.629	7.538	4.33	37.446	1
98711	NM_133832	Rdh10	-0.982122	2.47709e-05	0.000724141	-0.0135612	0.953399	0.995097	0.0255357	0.912386	0.999991	-1.52157	7.51734e-11	8.51691e-10	14.717	6.626	14.704	14.606	4.845	1
13476	NM_007874	Reep5	0.819626	2.15524e-06	8.2416e-05	0.0623976	0.718898	0.962106	0.0322159	0.852633	0.999991	1.38795	9.60386e-16	1.72556e-14	14.873	24.248	15.568	14.782	39.215	1
19698	NM_001290457	Relb	0.605092	0.00191476	0.0274837	0.493902	0.0114387	0.183939	0.0608536	0.757368	0.999991	2.82233	6.78237e-49	7.89525e-47	2.875	4.055	4.095	2.898	21.161	1
320100	NM_177073	Relt	1.33339	1.94768e-13	2.37852e-11	-1.49813	4.43885e-16	4.94552e-13	-0.54793	0.00271926	0.578115	2.57575	6.41499e-46	6.71138e-44	11.245	26.479	3.882	7.369	68.896	1
58887	NM_001079901	Repin1	-0.397782	0.00066811	0.012073	-0.122849	0.292137	0.858045	0.158275	0.173999	0.999991	-1.29815	5.98671e-28	2.43745e-26	16.112	11.16	14.851	17.437	6.394	0
68703	NM_001085492	Rere	0.432418	0.00492261	0.0575151	-0.0945184	0.539302	0.933437	0.0231544	0.880448	0.999991	0.527972	0.000594926	0.00217569	10.642	13.2	10.023	10.481	15.249	1
19718	NM_020022	Rfc2	0.375085	0.00135811	0.0211149	-0.022133	0.850272	0.980271	0.00832145	0.943428	0.999991	0.413429	0.000413994	0.00157137	66.819	79.417	65.735	65.202	88.146	1
67338	NM_001164569	Rffl	0.500851	0.000315775	0.00639275	0.465665	0.000816479	0.0258873	0.100431	0.473749	0.999991	0.363561	0.00910825	0.0239059	3.694	4.775	5.126	3.821	4.7	1
328370	NM_177815	Rft1	0.504911	3.96914e-05	0.00108102	-0.0865329	0.487373	0.922134	0.0369396	0.766542	0.999991	0.551396	7.14639e-06	4.01006e-05	5.362	6.992	5.062	5.34	7.791	1
19725	NM_009056	Rfx2	-0.525358	0.00289491	0.0378707	-0.139786	0.425761	0.908793	0.155811	0.373554	0.999991	-1.50645	5.90819e-17	1.17242e-15	4.942	3.111	4.495	5.384	1.673	1
19727	NM_011266	Rfxank	0.361109	0.000827697	0.0142911	0.183076	0.0906247	0.588494	0.0374683	0.729732	0.999991	0.273783	0.0113375	0.0288997	10.684	12.586	12.142	10.578	12.786	0
331474	NM_001278534	Rgag4	0.712274	0.00491742	0.0575016	-0.462104	0.0777695	0.553651	-0.134477	0.604294	0.999991	2.34893	3.17293e-21	8.41869e-20	0.499	0.768	0.355	0.437	2.709	1
19732	NM_009059	Rgl2	0.650859	0.000744429	0.0132001	0.337424	0.0805702	0.562065	0.249592	0.196339	0.999991	1.40806	2.79485e-13	3.9999e-12	15.902	23.12	20.242	18.285	42.8	1
64214	NM_022881	Rgs18	1.14008	0.00226784	0.0315643	-2.50568	4.57507e-11	1.32152e-08	-0.752381	0.0449848	0.999991	2.46587	3.85952e-11	4.52789e-10	5.178	11.377	0.694	2.784	33.757	1
56470	NM_001291206	Rgs19	0.716692	6.15699e-06	0.000213353	-0.936199	4.55876e-09	8.0804e-07	0.0576499	0.716729	0.999991	1.24288	4.22518e-15	7.20024e-14	35.558	51.644	18.529	36.125	78.732	1
19735	NM_009061	Rgs2	1.41698	3.56877e-20	9.31756e-18	-1.21986	9.59873e-15	7.88006e-12	-0.0143843	0.926182	0.999991	3.68215	3.41804e-127	2.69048e-124	8.743	21.687	3.692	8.44	115.331	1
50780	NM_134257	Rgs3	1.3886	1.75208e-15	2.77735e-13	0.0586682	0.739115	0.969169	-0.0487167	0.782574	0.999991	3.56166	1.67727e-93	7.29614e-91	3.794	9.276	3.961	3.55	46.59	1
56212	NM_019566	Rhog	0.536681	8.62515e-05	0.00211687	-0.350842	0.0104266	0.173383	-0.135427	0.322605	0.999991	0.998447	2.68565e-13	3.85363e-12	88.626	118.038	69.383	78.391	176.33	1
14787	NM_001163465	Rhpn1	1.63771	0.00675784	0.0722529	0.274766	0.649899	0.951267	0.242245	0.689064	0.999991	2.65529	1.11699e-05	6.01038e-05	0.085	0.755	0.144	0.135	2.309	1
234695	NM_001033320	Rltpr	-0.447407	0.00266384	0.0356341	0.116201	0.434869	0.910095	0.196051	0.187671	0.999991	-1.84558	5.6779e-35	3.21423e-33	70.28	46.956	76.365	78.003	18.955	0
78416	NM_030098	Rnase6	3.46579	1.4649e-24	6.16193e-22	-1.41951	0.000332318	0.0128623	-1.67184	3.95733e-05	0.0269225	6.26037	3.63419e-77	1.01819e-74	0.498	6.52	0.121	0.079	55.138	1
223881	NM_172612	Rnd1	1.51263	1.17739e-05	0.000380688	0.548158	0.127848	0.675769	0.149891	0.685861	0.999991	2.78852	9.27606e-17	1.81674e-15	0.133	0.417	0.215	0.147	1.169	1
74194	NM_028810	Rnd3	2.10361	4.85098e-15	7.13189e-13	0.63752	0.0198942	0.263644	0.173637	0.531271	0.999991	5.01824	2.29668e-79	7.03041e-77	0.612	2.649	0.997	0.663	23.712	1
24017	NM_001113413	Rnf13	0.491423	0.00396204	0.048463	-0.700316	4.4246e-05	0.00242158	0.0194476	0.909395	0.999991	1.26733	9.85773e-14	1.47866e-12	16.529	21.088	9.541	16.366	41.011	0
67702	NM_001033135	Rnf149	0.907262	1.81854e-08	1.10152e-06	-0.116336	0.47277	0.919293	0.0937941	0.562321	0.999991	2.13516	2.86718e-40	2.17406e-38	12.243	21.216	11.33	12.637	54.452	1
217340	NM_027258	Rnf157	-0.410135	0.00805216	0.08238	-0.139057	0.368636	0.894496	0.132196	0.392537	0.999991	-2.17821	3.49053e-44	3.35456e-42	23.292	15.953	21.229	24.884	4.965	1
30945	NM_013923	Rnf19a	-0.555783	0.00126171	0.0200906	0.0193938	0.910154	0.988534	0.19784	0.24947	0.999991	-0.679515	8.19524e-05	0.000365338	9.64	5.943	9.837	10.77	5.892	1
75234	NM_029219	Rnf19b	0.599876	0.000426642	0.00829351	0.21801	0.201184	0.778675	-0.0679933	0.690756	0.999991	1.72689	2.63604e-24	8.59444e-23	11.676	16.309	13.713	10.783	39.13	1
51902	NM_178607	Rnf24	1.03388	1.58592e-10	1.36452e-08	0.0666692	0.684179	0.955565	-0.0799226	0.62739	0.999991	2.08618	1.1225e-38	7.69912e-37	1.647	3.126	1.725	1.511	7.099	1
67588	NM_001164237	Rnf41	0.633094	4.13923e-07	1.91683e-05	0.00347476	0.977957	0.995097	0.208599	0.0967084	0.999991	0.927575	1.08498e-13	1.61719e-12	6.957	9.903	7.01	7.832	13.159	1
269695	NM_001109902	Rnft2	1.06662	0.00855594	0.0859739	0.20527	0.616011	0.94781	0.635586	0.118861	0.999991	1.8934	2.7352e-06	1.68454e-05	0.245	0.535	0.293	0.4	1.109	0
107702	NM_145135	Rnh1	0.585114	0.0103372	0.0988861	0.291854	0.201251	0.778675	0.0871643	0.702974	0.999991	2.01519	8.54299e-19	1.91869e-17	13.765	19.128	17.001	14.057	57.62	0
19876	NM_019413	Robo1	1.85185	0.00010777	0.00256597	-1.64746	0.000597611	0.0203084	-0.647377	0.17657	0.999991	0.676455	0.157394	0.26797	1.477	6.315	0.345	0.824	2.574	1
66049	NM_133185	Rogdi	2.57746	3.01893e-31	1.6327e-28	-0.0589588	0.79315	0.978499	0.289438	0.196697	0.999991	4.92542	7.69515e-110	4.24003e-107	5.909	34.492	5.661	7.112	199.801	1
19889	NM_001290644	Rp2	0.837241	0.000367696	0.00726895	-0.213644	0.364406	0.893836	-0.326975	0.165342	0.999991	1.65781	1.66852e-12	2.21709e-11	11.705	19.231	9.618	8.796	38.172	1
66211	NM_001163945	Rpl3l	-1.9161	5.58659e-07	2.49551e-05	0.0627991	0.855504	0.981299	0.655089	0.054207	0.999991	-1.17064	0.0013081	0.00436649	0.748	0.133	0.782	1.177	0.286	1
66229	NM_025433	Rpl7l1	0.433685	0.000265838	0.00552206	0.136763	0.25067	0.826934	0.0712966	0.549498	0.999991	0.238714	0.0448958	0.0943942	33.545	41.512	36.973	34.299	39.149	1
102614	NM_133982	Rpp25	1.58107	8.51836e-05	0.00209981	0.2558	0.533927	0.932863	-0.0104873	0.979835	0.999991	-0.220874	0.596358	0.724253	0.436	1.425	0.543	0.411	0.357	1
208366	NM_145938	Rpp40	0.563172	0.00334721	0.0423095	-0.0132656	0.945587	0.994422	0.0246072	0.899344	0.999991	0.308621	0.109833	0.200037	1.848	2.524	1.829	1.835	2.277	1
20111	NM_009097	Rps6ka1	0.660199	0.000394932	0.00771672	-0.261855	0.160318	0.738742	-0.162743	0.382868	0.999991	1.45848	4.81287e-15	8.13464e-14	37.206	55.068	31.162	32.009	106.879	1
27966	NM_145620	Rrp9	0.456396	0.000560859	0.0104595	0.228417	0.0846131	0.57347	0.154382	0.244199	0.999991	-0.0397261	0.764652	0.851216	29.546	37.202	34.741	32.073	28.389	1
237926	NM_001013381	Rsad1	0.521665	0.00251389	0.0340805	0.702997	4.41404e-05	0.00242158	-0.056587	0.746713	0.999991	-0.0436915	0.802767	0.877236	1.548	2.051	2.563	1.436	1.486	1
225215	NM_198609	Rsl24d1	0.310922	0.00100844	0.0167077	0.0674917	0.476113	0.920236	0.0899739	0.342328	0.999991	-0.491296	2.47585e-07	1.83771e-06	50.616	57.473	53.134	52.33	35.443	1
20166	NM_133641	Rtkn	-0.833538	0.00158045	0.0239751	0.315636	0.229753	0.805548	0.379333	0.148926	0.999991	-2.3726	7.06579e-19	1.59342e-17	9.672	4.786	12.369	12.309	1.735	0
170728	NM_130892	Rtn4ip1	0.3417	0.00165477	0.0247366	-0.141173	0.19963	0.777505	0.105776	0.333976	0.999991	0.27925	0.0103015	0.0266026	5.07	5.887	4.597	5.291	6.082	1
216724	NM_172557	Rufy1	0.907137	1.04845e-07	5.41867e-06	0.0864057	0.615311	0.947768	0.0875996	0.610766	0.999991	1.7308	2.13827e-24	7.06914e-23	4.749	8.259	5.076	4.896	15.968	1
20174	NM_011304	Ruvbl2	0.414559	0.000877744	0.0149345	0.157077	0.207756	0.784934	0.0840458	0.500467	0.999991	-0.717683	9.73334e-09	8.7299e-08	63.7	77.836	71.255	65.927	38.084	0
381489	NM_212452	Rxfp1	-1.33061	0.00772964	0.0800615	-0.235663	0.630495	0.947856	0.0585379	0.904638	0.999991	-2.23656	1.32687e-05	7.03436e-05	0.385	0.101	0.316	0.39	0.034	1
20195	NM_016740	S100a11	1.075	1.79751e-05	0.000544507	-0.736781	0.00332492	0.0747292	-0.0655995	0.793669	0.999991	2.77063	2.03196e-28	8.41812e-27	213.228	424.354	124.851	196.882	1565.21	1
13611	NM_010102	S1pr4	-0.637543	0.000826057	0.0142911	0.64252	0.000648323	0.0216543	0.134935	0.475686	0.999991	-0.648893	0.000669908	0.00241149	6.368	3.691	10.098	6.774	3.964	0
56045	NM_001139520	Samhd1	1.39591	3.88924e-05	0.00106308	0.0301603	0.929207	0.990429	0.0366345	0.914068	0.999991	3.27295	5.00458e-22	1.41654e-20	13.457	35.56	13.873	13.4	156.663	1
66397	NM_025535	Sar1b	0.416941	1.26546e-05	0.000402582	-0.0008411	0.993019	0.997303	0.1743	0.0693135	0.999991	0.344423	0.000316383	0.00123724	25.514	31.188	25.541	27.881	32	1
70097	NM_175155	Sash1	2.73992	2.55912e-17	5.09904e-15	0.220885	0.496533	0.924024	0.317967	0.327641	0.999991	5.58833	7.0232e-67	1.50771e-64	1.325	9.52	1.586	1.616	85.338	1
20229	NM_001291865	Sat1	0.53609	0.00103727	0.0170918	0.641839	8.40919e-05	0.00408226	0.0930859	0.572035	0.999991	3.22152	3.01659e-89	1.24661e-86	8.592	11.42	13.44	8.87	81.719	0
24044	NM_022813	Scamp2	0.524811	0.000154611	0.00346343	0.0390617	0.77889	0.976592	-0.0164884	0.905751	0.999991	0.80376	6.57038e-09	6.05398e-08	15.443	20.402	15.881	14.833	26.856	1
327957	NM_001045526	Scimp	3.24294	3.04219e-16	5.17617e-14	-0.484704	0.292165	0.858045	-1.10738	0.0229581	0.999991	5.90549	1.55533e-51	1.99299e-49	0.125	1.813	0.065	0.007	14.127	1
20259	NM_001146196	Scin	1.01924	1.03552e-07	5.37018e-06	-0.974032	3.87071e-07	4.16381e-05	-0.299411	0.118437	0.999991	-0.148913	0.437331	0.581069	53.225	100.303	26.785	41.626	47.193	1
268297	NM_172938	Scml4	-1.20201	1.16874e-18	2.80925e-16	-0.845486	4.10351e-10	9.27631e-08	-0.108222	0.418908	0.999991	-1.03449	2.66979e-14	4.21909e-13	5.65	2.22	3.123	5.096	2.691	1
20269	NM_018732	Scn3a	2.09967	6.0425e-08	3.36403e-06	0.767528	0.0560958	0.473988	0.146111	0.724632	0.999991	3.06379	1.19992e-15	2.14429e-14	0.025	0.132	0.05	0.028	0.298	1
20280	NM_011327	Scp2	0.409212	0.00277109	0.0366166	-0.116001	0.397177	0.904972	0.00726754	0.957688	0.999991	1.24429	7.96782e-20	1.91158e-18	28.336	34.484	26.128	27.664	66.997	1
74617	NM_029023	Scpep1	0.64739	0.00549199	0.0620174	0.356242	0.127084	0.674928	0.0804342	0.731045	0.999991	2.73497	4.45346e-32	2.13999e-30	5.783	8.441	7.546	5.942	41.06	1
64136	NM_022324	Sdf2l1	0.413671	0.00202947	0.0288838	-0.081292	0.545064	0.936184	0.0076327	0.954684	0.999991	0.225452	0.0928679	0.173871	56.622	69.193	53.506	55.34	65.532	1
67680	NM_023374	Sdhb	0.544728	2.17677e-06	8.26137e-05	0.131879	0.252374	0.828642	0.100704	0.382354	0.999991	-0.0175326	0.879165	0.924502	68.686	91.925	75.263	71.671	66.973	1
110379	NM_024206	Sec13	0.411941	1.26162e-05	0.000402204	0.029655	0.753872	0.971358	0.032327	0.732651	0.999991	0.13073	0.166676	0.280252	59.244	72.19	60.575	58.774	64.126	1
20341	NM_009150	Selenbp1	1.1672	0.00706694	0.0746267	0.933581	0.0315476	0.343425	-0.0160706	0.970873	0.999991	2.5129	5.19632e-09	4.85284e-08	0.424	1.038	0.942	0.408	3.277	1
20342	NM_019414	Selenbp2	1.7518	2.07632e-05	0.000615298	0.757798	0.0694472	0.525079	-0.358305	0.405952	0.999991	3.90958	7.23224e-22	2.02282e-20	0.261	1.031	0.506	0.182	5.903	1
20345	NM_009151	Selplg	-0.419417	0.000218985	0.00469036	0.0227799	0.840819	0.979392	0.00626933	0.955923	0.999991	-0.469187	3.56186e-05	0.000171381	159.47	108.708	162.449	155.716	113.549	1
20348	NM_013657	Sema3c	2.79374	1.88784e-12	2.05665e-10	-1.02755	0.0138944	0.209396	-0.157759	0.699389	0.999991	2.85067	6.63805e-13	9.12112e-12	0.176	1.48	0.071	0.149	1.661	1
20352	NM_013659	Sema4b	0.704354	0.000603778	0.0110423	-0.106188	0.606564	0.945117	0.0258631	0.900145	0.999991	2.57121	3.08627e-36	1.88251e-34	4.718	7.132	4.392	4.692	29.217	1
20353	NM_001126047	Sema4c	-0.680374	0.00626693	0.0686191	0.103989	0.673908	0.95456	0.369958	0.133896	0.999991	0.0760773	0.75829	0.847386	2.651	1.476	2.871	3.351	2.776	1
20359	NM_001130456	Sema6b	0.604623	0.00808823	0.0825337	0.148771	0.516184	0.929196	0.0426569	0.852583	0.999991	-0.205479	0.37182	0.519907	2.3	3.252	2.573	2.309	1.969	1
214968	NM_001291000	Sema6d	1.51193	0.000269859	0.00559791	0.752912	0.0763579	0.547348	0.695795	0.103148	0.999991	3.35383	1.04062e-16	2.02609e-15	0.031	0.109	0.065	0.06	0.494	1
80886	NM_030702	Senp3	0.363634	0.00633828	0.0692001	-0.0302822	0.820359	0.979392	0.114142	0.391931	0.999991	-0.0447917	0.736988	0.831711	40.576	47.139	39.656	42.424	38.825	1
218442	NM_172588	Serinc5	-0.925403	0.000982871	0.0163916	1.07548	0.000111995	0.00516835	0.460744	0.0985322	0.999991	-0.427637	0.126593	0.224912	2.482	1.147	5.513	3.405	1.796	1
20715	NM_009251	Serpina3g	1.3902	3.38323e-12	3.63349e-10	1.18504	3.34639e-09	6.21393e-07	-0.227847	0.276045	0.999991	4.79199	2.01943e-132	1.66906e-129	1.486	3.687	3.507	1.213	44.573	0
20725	NM_011459	Serpinb8	2.43378	3.40064e-06	0.000124386	0.121161	0.819256	0.979392	-0.0951371	0.858037	0.999991	2.28131	1.3479e-05	7.14149e-05	0.094	1.214	0.131	0.113	1.233	1
20706	NM_011452	Serpinb9b	1.59934	0.00391173	0.0480026	0.300808	0.594164	0.94145	0.0312207	0.956197	0.999991	2.65611	1.37816e-06	8.97242e-06	0.036	0.224	0.059	0.036	0.623	1
11905	NM_080844	Serpinc1	3.87417	1.88269e-25	8.14558e-23	-0.48109	0.208826	0.785268	-0.20862	0.584302	0.999991	1.02433	0.00635085	0.0174762	0.662	11.962	0.445	0.534	1.455	1
230784	NM_144907	Sesn2	0.793017	0.00805684	0.08238	-0.188095	0.531036	0.932366	-0.014336	0.961903	0.999991	2.26881	3.03179e-14	4.78202e-13	4.246	6.98	3.727	4.087	22.444	1
56086	NM_001204875	Set	0.384327	0.00445734	0.0529808	-0.0212674	0.874977	0.983181	0.0817309	0.545398	0.999991	-0.426119	0.00162312	0.00527632	204.903	245.153	202.386	211.518	150.05	1
66125	NM_175102	Sf3b5	0.425597	0.00425273	0.0511917	0.18863	0.205472	0.782918	0.0993365	0.505167	0.999991	0.0211098	0.8874	0.929366	83.182	102.583	94.949	86.814	83.43	1
106489	NM_134114	Sft2d1	0.449719	0.00130281	0.0204731	0.29769	0.0335396	0.356613	0.119927	0.393013	0.999991	0.969286	3.54674e-12	4.59104e-11	22.519	28.25	27.762	23.612	43.919	1
14057	NM_027324	Sfxn1	0.474616	0.00614385	0.0676675	0.0108788	0.949973	0.995097	0.0545576	0.753045	0.999991	-0.02212	0.898503	0.936755	23.502	30.046	23.791	23.809	22.905	1
24051	NM_011890	Sgcb	0.449398	0.000917488	0.0154889	0.10772	0.431634	0.910092	0.125806	0.359248	0.999991	0.479245	0.000407615	0.00155036	2.063	2.589	2.232	2.188	2.855	0
20393	NM_011361	Sgk1	1.23412	1.71639e-05	0.000525075	-0.150408	0.601458	0.943437	0.244216	0.39593	0.999991	0.870312	0.00244711	0.00760466	6.635	15.019	5.976	7.699	12.47	1
105835	NM_134091	Sgsm3	0.484533	0.00161702	0.0243405	0.134351	0.384106	0.900177	0.150598	0.329646	0.999991	0.321009	0.0371562	0.0805568	4.653	5.984	5.134	5.023	5.764	1
23921	NM_018825	Sh2b2	1.43579	7.33468e-13	8.54378e-11	-0.999773	1.51633e-06	0.000142481	-0.226966	0.266581	0.999991	2.8424	2.93218e-46	3.14733e-44	2.482	6.335	1.211	2.061	18.629	0
16923	NM_008507	Sh2b3	0.709773	0.000991902	0.0164878	-0.289688	0.179606	0.76155	0.0428851	0.842451	0.999991	2.21578	7.88266e-25	2.67935e-23	14.423	21.897	11.816	14.453	69.594	1
26904	NM_012009	Sh2d1b1	2.90775	5.01403e-10	4.01732e-08	0.614747	0.205594	0.783113	1.06269	0.0270863	0.999991	5.86951	8.04966e-37	5.13749e-35	0.07	1.094	0.154	0.231	12.104	1
545378	NM_001033499	Sh2d1b2	2.01168	0.000120692	0.00282916	0.233259	0.678735	0.954969	0.504801	0.365368	0.999991	4.93368	6.481e-23	1.91991e-21	0	0.546	0.039	0.078	6.127	1
27371	NM_021309	Sh2d2a	-0.810137	0.00131122	0.0205566	-0.0926974	0.712853	0.961613	0.264709	0.293162	0.999991	-2.43651	6.73914e-22	1.89131e-20	16.985	8.627	15.931	20.068	2.85	1
230863	NM_001099631	Sh2d5	-0.912957	0.000207909	0.00448485	-0.834843	0.000688454	0.0225599	-0.167399	0.494332	0.999991	-2.35455	8.33177e-21	2.16207e-19	5.176	2.446	2.829	4.382	0.92	1
73723	NM_080559	Sh3bgrl3	0.518823	0.00369673	0.0458848	-0.363741	0.0420283	0.405416	0.0141992	0.936712	0.999991	1.23278	5.17471e-12	6.56469e-11	194.378	256.352	149.937	191.594	459.824	1
20401	NM_009164	Sh3bp1	0.703139	1.17904e-05	0.000380688	-0.193915	0.227806	0.803553	-0.0648719	0.68656	0.999991	1.47035	4.72105e-20	1.16071e-18	42.049	63.122	36.911	39.021	117.215	1
24055	NM_001145858	Sh3bp2	1.34354	5.19351e-13	6.19254e-11	-0.210858	0.268007	0.83978	-0.304828	0.110752	0.999991	3.31414	3.2695e-72	8.71692e-70	2.234	5.281	1.969	1.752	22.873	1
24056	NM_011894	Sh3bp5	-0.563547	0.00393131	0.048165	-0.261096	0.181171	0.762936	-0.042108	0.829201	0.999991	-2.01411	1.56332e-24	5.21e-23	24.642	15.074	20.6	23.199	5.794	1
14218	NM_008018	Sh3pxd2a	0.713858	0.0012827	0.0202544	-0.339502	0.12609	0.673083	0.344781	0.120048	0.999991	0.73539	0.000910124	0.0031679	8.31	12.673	6.563	10.334	13.931	1
268396	NM_177364	Sh3pxd2b	1.31515	0.00185167	0.0268323	0.417505	0.323757	0.874878	-0.0026237	0.995059	0.999991	2.24061	1.10843e-07	8.6426e-07	0.666	1.763	0.947	0.636	3.996	1
231147	NM_194344	Sh3tc1	1.86197	2.42423e-06	9.13187e-05	0.882668	0.0263775	0.311411	-0.35085	0.386046	0.999991	4.56525	3.07765e-31	1.42105e-29	0.233	0.954	0.483	0.167	8.255	1
320007	NM_001159419	Sidt1	1.52033	4.52336e-08	2.56544e-06	0.396076	0.154888	0.728572	0.628291	0.0239976	0.999991	-2.26619	1.15376e-15	2.06851e-14	4.803	13.377	6.448	7.333	0.882	1
83382	NM_031181	Siglece	1.97197	1.29991e-09	9.79328e-08	-1.05154	0.00724699	0.13053	-0.891873	0.0214643	0.999991	5.35315	3.17524e-65	6.47985e-63	0.18	0.78	0.062	0.071	9.892	1
233186	NM_145581	Siglecf	2.88217	1.7768e-09	1.27517e-07	-1.59772	0.000902567	0.0277131	-0.858587	0.0739289	0.999991	4.23964	8.58271e-19	1.925e-17	2.778	29.095	0.621	1.233	93.692	1
243958	NM_172900	Siglecg	3.13679	3.7054e-18	8.37476e-16	-0.504027	0.191053	0.772633	-0.520799	0.178374	0.999991	6.22051	2.93591e-67	6.47074e-65	0.24	2.569	0.154	0.146	27.735	1
244668	NM_001081337	Sipa1l2	0.858617	0.00539702	0.0613658	-0.270292	0.386612	0.900177	-0.0415049	0.894009	0.999991	1.9219	3.85242e-10	4.11373e-09	0.527	0.916	0.431	0.494	2.192	1
19261	NM_001291020	Sirpa	2.20278	1.11822e-27	5.29162e-25	-0.520803	0.0126032	0.19668	-0.979413	3.89931e-06	0.00390115	5.98135	8.7866e-195	4.84142e-191	1.57	6.928	1.08	0.748	109.936	1
54353	NM_018773	Skap2	1.10768	1.80319e-13	2.25667e-11	-0.169021	0.27224	0.841287	0.170704	0.264374	0.999991	3.41487	4.30399e-117	2.8458e-114	5.591	11.159	4.971	6.1	61.077	1
20491	NM_009192	Sla	0.873442	7.21996e-08	3.95995e-06	0.0529731	0.744335	0.970423	0.0742249	0.647749	0.999991	1.05916	6.48328e-11	7.41139e-10	25.106	42.151	26.597	26.003	51.849	1
77799	NM_029983	Sla2	-0.449749	0.00303477	0.0391111	0.0473883	0.75457	0.971358	0.0757324	0.617379	0.999991	-1.20422	2.40547e-15	4.18992e-14	54.798	36.483	56.645	56.244	23.201	1
18174	NM_008732	Slc11a2	-0.450883	0.00269328	0.0358702	-0.144463	0.335671	0.880483	0.152719	0.308377	0.999991	-1.54629	1.88162e-24	6.24561e-23	20.883	13.906	18.96	22.533	6.944	1
20499	NM_011390	Slc12a7	-0.561703	0.0025079	0.0340601	-0.318073	0.0868618	0.579577	0.172155	0.3538	0.999991	-0.525012	0.00472782	0.0135069	22.245	13.659	17.848	24.24	15.16	1
57738	NM_021301	Slc15a2	-0.936429	2.64561e-06	9.86759e-05	0.345558	0.0786802	0.557421	0.296805	0.13131	0.999991	-0.957564	1.59743e-06	1.02705e-05	3.527	1.653	4.529	4.188	1.753	0
65221	NM_023044	Slc15a3	2.39763	6.92758e-08	3.8147e-06	0.564375	0.213755	0.789501	0.417583	0.359728	0.999991	5.79273	2.12942e-39	1.5107e-37	0.129	0.977	0.221	0.18	15.166	1
69309	NM_172371	Slc16a13	0.705487	0.00668335	0.0717773	-0.281132	0.287927	0.855453	-0.0911404	0.729777	0.999991	1.00097	0.00011349	0.000490199	1.304	1.997	1.061	1.185	2.676	1
20503	NM_011391	Slc16a7	2.03891	1.84702e-07	9.20046e-06	-1.20987	0.00226948	0.055572	-0.654022	0.0975047	0.999991	1.06289	0.00665351	0.018212	1.876	8.395	0.713	1.075	4.253	1
13358	NM_153150	Slc25a1	0.432385	0.00916729	0.0902016	-0.0321033	0.846821	0.979674	0.0466968	0.778713	0.999991	0.240552	0.147413	0.254237	29.62	36.717	29.005	29.732	34.694	1
67863	NM_024211	Slc25a11	0.60451	1.35513e-05	0.000429303	-0.0351523	0.800672	0.979392	0.0152221	0.912948	0.999991	1.12202	6.23306e-16	1.13848e-14	36.283	50.674	35.428	35.7	78.771	0
68267	NM_026646	Slc25a22	0.526992	7.48096e-05	0.00188807	0.118999	0.372948	0.897168	-0.00931183	0.944542	0.999991	0.636455	1.70032e-06	1.09024e-05	9.972	13.176	10.88	9.563	15.367	0
227731	NM_146118	Slc25a25	0.439464	0.00636346	0.069425	0.132525	0.41171	0.905851	0.130892	0.417793	0.999991	0.494927	0.00211652	0.00667929	6.458	8.035	7.14	6.899	9.049	1
74011	NM_028711	Slc25a27	-1.04759	0.000384425	0.00756019	0.477706	0.0989494	0.611877	0.0800159	0.783104	0.999991	-1.17638	7.05766e-05	0.000318839	1.914	0.803	2.733	1.935	0.788	0
11739	NM_007450	Slc25a4	0.531653	0.0021759	0.0304807	0.180592	0.297971	0.860755	0.128773	0.458065	0.999991	0.622277	0.000333508	0.00129807	118.813	158.18	135.286	126.811	182.662	0
107375	NM_134154	Slc25a45	0.496707	0.001516	0.0231419	-0.292418	0.0634288	0.504886	-0.0913616	0.561494	0.999991	1.17083	6.47196e-14	9.85096e-13	14.281	18.534	11.637	12.905	32.187	1
11740	NM_007451	Slc25a5	0.407855	0.000358683	0.0071173	0.00435361	0.969622	0.995097	0.0888037	0.437279	0.999991	-0.343064	0.00270239	0.00827691	344.079	418.367	345.557	357.241	267.381	1
171429	NM_134420	Slc26a6	0.561204	0.00181907	0.0264358	0.033416	0.856777	0.981397	0.09834	0.595428	0.999991	0.904928	3.4806e-07	2.50476e-06	0.718	0.982	0.738	0.746	1.352	1
26457	NM_011977	Slc27a1	-0.481536	0.00893462	0.0885724	0.537731	0.00330671	0.0744271	0.168615	0.358003	0.999991	-1.20871	7.55971e-11	8.55904e-10	8.824	5.73	12.957	9.68	3.7	1
269346	NM_172980	Slc28a2	-0.804597	0.0083822	0.0846211	-0.293676	0.335462	0.880483	-0.565855	0.0636409	0.999991	-1.39782	4.83107e-06	2.82482e-05	9.061	4.565	7.312	5.708	3.154	1
20527	NM_011401	Slc2a3	1.09753	2.20031e-05	0.000648236	-1.83339	2.35295e-12	9.65823e-10	-0.268977	0.299723	0.999991	1.60831	4.92713e-10	5.20418e-09	6.857	13.922	1.801	5.573	21.786	1
20529	NM_175090	Slc31a1	1.04285	3.41628e-13	4.13862e-11	-0.266285	0.0650198	0.508871	0.113384	0.43104	0.999991	0.663313	3.8125e-06	2.28087e-05	9.853	18.745	8.22	10.356	15.507	1
58246	NM_021435	Slc35b4	0.868143	1.30741e-05	0.000415055	-0.70078	0.000444975	0.0160665	-0.0181171	0.927587	0.999991	0.384352	0.0537308	0.109815	27.313	46.304	16.7	26.18	35.434	1
228875	NM_144893	Slc35c2	0.821403	1.3183e-09	9.88271e-08	0.0385086	0.777391	0.976397	-0.0428329	0.753527	0.999991	1.80065	1.22778e-40	9.43964e-39	14.52	23.67	14.895	13.871	50.729	1
76157	NM_029529	Slc35d3	1.54942	4.22005e-05	0.00113305	0.182272	0.630765	0.947856	0.268538	0.478846	0.999991	1.8983	5.20435e-07	3.62987e-06	2.911	8.886	3.374	3.464	12.577	1
56293	NM_019871	Slc35g3	-1.09873	0.00890585	0.0884608	0.702326	0.075579	0.545778	0.10882	0.786397	0.999991	-2.20969	1.02676e-06	6.82716e-06	0.448	0.158	0.783	0.477	0.046	0
215332	NM_172258	Slc36a3	2.38441	2.24789e-11	2.18204e-09	-1.11882	0.0130057	0.200656	-0.358376	0.393247	0.999991	3.62697	2.38222e-25	8.32518e-24	0.102	0.652	0.022	0.066	1.75	1
106957	NM_139143	Slc39a6	0.475789	0.00819119	0.0831961	-0.444068	0.0137772	0.208233	0.0866067	0.630587	0.999991	0.0894768	0.619268	0.743313	19.012	24.348	13.985	19.665	20.047	1
215113	NM_001199283	Slc43a2	0.505568	0.00750225	0.0785661	-1.21115	1.79433e-10	4.30584e-08	-0.0507513	0.788604	0.999991	1.07176	1.41719e-08	1.24541e-07	10.67	13.994	4.567	9.994	22.576	1
71706	NM_027872	Slc46a3	1.24762	1.49242e-10	1.29142e-08	-1.14722	3.10851e-08	4.53145e-06	0.0526824	0.791215	0.999991	4.37129	1.03107e-114	6.087e-112	2.033	4.536	0.885	2.042	44.928	1
52710	NM_029643	Slc52a2	0.651398	8.51648e-08	4.5139e-06	0.186027	0.129357	0.677995	0.149405	0.224289	0.999991	0.40422	0.000939413	0.0032534	5.397	7.793	6.162	5.792	7.076	0
14411	NM_133661	Slc6a12	2.08092	3.70878e-05	0.00101865	0.669307	0.207104	0.78408	0.149703	0.783878	0.999991	5.31922	7.28183e-28	2.95746e-26	0.006	0.123	0.03	0.009	1.726	1
14412	NM_144512	Slc6a13	0.816312	0.000532707	0.00998815	-0.889551	0.000296393	0.0117326	0.0789102	0.741407	0.999991	2.37044	2.18426e-24	7.20675e-23	1.61	2.657	0.837	1.659	8.783	1
21366	NM_009320	Slc6a6	0.504971	0.00900321	0.0889338	-0.215372	0.265639	0.838754	0.0206133	0.915136	0.999991	0.979738	3.99494e-07	2.84762e-06	18.706	24.495	16.189	18.473	37.146	1
20541	NR_104580	Slc8a1	1.05308	0.00756161	0.0790017	-1.45841	0.000248291	0.0100677	0.0857747	0.82814	0.999991	2.21249	1.93028e-08	1.6767e-07	0.406	0.834	0.13	0.412	2.233	1
226999	NM_001033289	Slc9a2	-1.52434	0.0039804	0.0486444	-0.552005	0.27779	0.847608	0.241631	0.62736	0.999991	-0.196138	0.69669	0.803091	0.08	0.01	0.046	0.097	0.066	1
236727	NM_177353	Slc9a7	0.971631	0.00118145	0.0190936	-0.605871	0.0473622	0.430761	0.0748223	0.804626	0.999991	2.04209	7.24917e-12	9.05051e-11	1.333	2.511	0.853	1.363	5.975	1
227394	NM_172658	Slco4c1	1.5532	0.00324484	0.0412913	-0.135164	0.810975	0.979392	-0.219636	0.699475	0.999991	4.93859	8.61252e-23	2.52869e-21	0.006	0.076	0.003	0	1.297	0
237887	NR_073523	Slfn10-ps	-0.828725	0.00212217	0.0299218	-0.894793	0.000912476	0.027916	-0.0511574	0.849082	0.999991	-1.16807	1.55823e-05	8.11064e-05	5.373	2.681	2.829	5.04	2.257	1
20556	NM_011408	Slfn2	1.05146	2.43427e-08	1.42876e-06	0.429434	0.0229106	0.289126	0.393711	0.0370663	0.999991	2.35853	5.05433e-36	3.03811e-34	22.187	42.805	30.103	28.389	116.701	1
66390	NM_025531	Slmo2	0.341647	0.00817815	0.0831961	0.0289243	0.823133	0.979392	0.126426	0.328509	0.999991	-0.0523388	0.686076	0.795845	36.825	42.774	37.687	39.234	35.118	1
20603	NM_009214	Sms	0.514723	0.000103371	0.00246901	-0.0416812	0.753651	0.971358	-0.00191184	0.988517	0.999991	-0.104496	0.431577	0.576227	23.06	30.229	22.47	22.418	21.134	1
69726	NM_027188	Smyd3	-0.302301	0.00690597	0.0734906	0.257212	0.0198848	0.263644	0.117526	0.289461	0.999991	-1.03588	2.05176e-19	4.8039e-18	5.013	3.709	6.013	5.286	2.396	1
232187	NM_144918	Smyd5	0.502282	4.10953e-05	0.00110738	-0.0391708	0.750109	0.971358	0.0806339	0.51188	0.999991	-0.318531	0.00982753	0.0255297	15.54	20.2	15.181	15.945	12.281	0
30927	NM_013914	Snai3	-0.706161	0.00127199	0.0201482	0.831603	0.000111623	0.00516643	-0.0349133	0.872257	0.999991	-1.69939	4.38227e-14	6.78903e-13	5.485	3.017	9.977	5.19	1.582	1
67826	NM_144521	Snap47	0.668203	0.00553564	0.0623907	0.114391	0.635502	0.947963	0.139461	0.563421	0.999991	0.580727	0.0159473	0.0388232	9.646	14.281	10.484	10.429	14.545	1
20638	NM_009225	Snrpb	0.290781	0.00556917	0.0626087	0.24193	0.0210992	0.274713	0.0870544	0.406831	0.999991	-0.0979411	0.350856	0.496885	204.833	229.45	242.498	211.306	188.985	0
20630	NM_011432	Snrpc	0.346834	0.00950684	0.0926993	0.212179	0.112843	0.643273	0.100873	0.451369	0.999991	-0.388757	0.00379184	0.0111449	75.175	87.692	87.153	78.266	56.491	1
67332	NM_026095	Snrpd3	0.337689	0.00862814	0.0864087	0.0106183	0.934239	0.991485	0.0422786	0.742537	0.999991	-0.414226	0.00131035	0.00437165	172.982	200.357	174.272	173.628	127.673	1
71982	NM_028035	Snx10	0.529713	0.000314805	0.00639021	-0.565988	0.000140228	0.00628526	-0.401956	0.00677705	0.873213	0.767036	1.75277e-07	1.32479e-06	9.992	13.267	6.722	7.343	16.919	1
170625	NM_130796	Snx18	0.591316	0.00826901	0.0838137	-0.209155	0.351193	0.889087	0.0332043	0.882281	0.999991	1.60584	6.90558e-13	9.46512e-12	7.626	10.654	6.602	7.56	23.85	1
71607	NM_027840	Snx20	1.3273	3.30448e-10	2.69031e-08	-0.17151	0.419767	0.907426	-0.280852	0.187011	0.999991	2.73997	1.22561e-38	8.33717e-37	12.232	28.869	10.827	9.765	85.523	1
12702	NM_007707	Socs3	-1.03144	2.56778e-06	9.60096e-05	0.546588	0.0123637	0.194993	0.202374	0.354646	0.999991	-0.0329171	0.880369	0.925225	18.878	8.223	27.974	21.021	18.261	1
20660	NM_011436	Sorl1	1.28644	4.7804e-08	2.6811e-06	-0.742585	0.00214514	0.0532791	0.196738	0.408843	0.999991	3.54452	7.82875e-52	1.01897e-49	0.793	1.843	0.458	0.888	10.095	1
20668	NM_011439	Sox13	-0.944779	0.000371322	0.00733106	-1.07191	5.39545e-05	0.00285282	0.295754	0.264538	0.999991	-3.83083	6.40218e-46	6.71138e-44	22.834	10.491	10.538	27.634	1.361	1
109032	NM_030194	Sp110	-0.269347	0.0103256	0.0988377	-0.0500342	0.63347	0.947856	0.14278	0.173403	0.999991	-0.145658	0.165283	0.278399	69.965	53.042	67.523	74.836	62.35	1
67946	NM_026470	Spata6	-0.767077	1.58038e-05	0.000487081	0.0408306	0.817375	0.979392	0.24066	0.17325	0.999991	-1.21072	1.16485e-11	1.42524e-10	14.269	7.565	14.754	16.449	5.978	1
432572	NM_001281818	Specc1	0.855756	0.00571052	0.0638659	-0.24085	0.438375	0.910218	0.14808	0.633276	0.999991	1.9395	3.48997e-10	3.74362e-09	1.408	2.438	1.189	1.516	5.891	1
70896	NR_001586	Speer1	1.95365	6.83301e-05	0.00174196	0.531265	0.287024	0.855302	-0.0602045	0.905297	0.999991	0.981102	0.0477896	0.0993642	0.224	1.202	0.379	0.202	0.56	1
320277	NM_177123	Spef2	-0.661557	0.00587134	0.0652944	-0.358624	0.127935	0.675769	-0.170433	0.466416	0.999991	0.335261	0.141517	0.245851	0.43	0.241	0.331	0.37	0.542	0
20375	NM_011355	Spi1	4.89394	9.43833e-88	1.42925e-83	3.53504	1.29706e-46	2.02315e-42	5.86891	2.197e-125	3.73666e-121	5.85684	7.04077e-125	5.29018e-122	7.214	230.31	94.65	487.567	497.699	0
272382	NM_019866	Spib	-0.789361	0.00678033	0.072306	0.0354154	0.90314	0.987533	0.381739	0.189421	0.999991	-1.67161	1.11417e-08	9.9231e-08	10.771	5.5	11.093	13.928	3.073	1
20732	NM_016907	Spint1	3.556	9.81608e-18	2.1235e-15	-0.0928928	0.846707	0.979674	0.30891	0.51008	0.999991	7.72398	2.99523e-80	9.90223e-78	0.024	0.675	0.02	0.037	15.835	1
77577	NM_029932	Spns3	0.519628	0.00719615	0.0757271	-0.163655	0.399357	0.905071	0.000968791	0.996017	0.999991	1.35462	2.09107e-12	2.75422e-11	10.074	13.341	8.966	9.758	26.134	1
26972	NM_001083959	Spo11	-1.49753	5.09246e-05	0.00134581	1.08268	0.00284719	0.0665824	0.31474	0.387164	0.999991	-3.38886	3.66964e-18	7.8169e-17	3.105	0.882	7.106	3.795	0.183	1
24063	NM_011896	Spry1	-0.734293	0.00478822	0.0563387	0.725756	0.00467143	0.0971475	0.29112	0.258173	0.999991	-1.22772	2.98904e-06	1.8259e-05	2.86	1.528	4.882	3.421	1.151	0
20807	NM_020493	Srf	0.458931	0.00305013	0.0392756	0.0810165	0.601332	0.943365	0.0474636	0.759605	0.999991	0.550907	0.000375243	0.00143849	16.562	20.916	17.607	16.702	24.158	1
259302	NM_080448	Srgap3	1.13099	6.86217e-06	0.000235099	0.59574	0.0183403	0.251602	0.442232	0.0806927	0.999991	3.11976	7.42032e-36	4.36505e-34	0.516	1.077	0.806	0.692	4.917	1
19073	NM_011157	Srgn	0.365606	0.00255011	0.0344174	-0.368521	0.00240232	0.0580952	-0.397164	0.00107498	0.320759	0.418572	0.00055104	0.00202957	144.395	170.366	111.478	105.997	190.559	1
20810	NM_009272	Srm	0.592119	0.000391321	0.00766593	0.166048	0.320358	0.872945	0.0361915	0.828593	0.999991	-0.659085	8.27578e-05	0.000368233	69.468	96.505	78.273	69.669	43.149	1
108014	NR_036616	Srsf9	0.362688	0.00487262	0.0571542	0.149252	0.246964	0.822937	0.122312	0.342905	0.999991	0.255826	0.0471453	0.0982367	70.776	83.378	78.736	75.158	83.59	1
66970	NM_024272	Ssbp2	-0.908307	3.3692e-06	0.000123534	0.0340085	0.861187	0.9816	0.0557324	0.77449	0.999991	-1.48308	4.45469e-14	6.89476e-13	5.08	2.431	5.223	5.143	1.748	1
243369	NM_173428	Sspo	1.83623	1.98934e-05	0.000596527	1.99157	3.28065e-06	0.000273645	0.686863	0.133119	0.999991	4.7637	2.23658e-31	1.0385e-29	0.004	0.026	0.032	0.009	0.261	1
20606	NM_009217	Sstr2	-1.69179	2.93908e-10	2.44541e-08	-1.15067	1.6755e-05	0.00106671	0.199226	0.45366	0.999991	-4.79562	7.65476e-60	1.26533e-57	14.788	3.929	6.397	16.537	0.389	1
19143	NM_011176	St14	0.758157	0.00396108	0.048463	-1.93172	1.68354e-12	7.09725e-10	0.891431	0.000702055	0.225293	1.70387	8.10744e-11	9.14785e-10	1.791	2.848	0.428	3.328	6.133	1
20454	NM_011375	St3gal5	0.666301	0.00164598	0.0246639	-0.236039	0.271079	0.84043	0.0882878	0.679239	0.999991	2.97693	5.37712e-46	5.69768e-44	2.802	4.089	2.363	2.89	23.138	1
20440	NM_145933	St6gal1	0.88256	0.00737262	0.077262	-0.967324	0.00338134	0.075779	-0.0702893	0.83115	0.999991	1.64217	6.12058e-07	4.20679e-06	8.053	14.311	3.891	7.498	27.486	1
20448	NM_011373	St6galnac4	0.547255	9.32395e-05	0.0022627	-0.048009	0.73275	0.966518	0.00936141	0.946919	0.999991	0.177544	0.205991	0.332328	8.967	12.119	8.763	8.84	10.083	1
76630	NM_029682	Stambpl1	-0.40003	0.0049662	0.0578931	0.280923	0.0465095	0.426738	-0.268003	0.0595831	0.999991	-0.732415	3.23778e-07	2.34842e-06	10.367	7.151	12.677	8.367	6.12	1
56018	NM_019990	Stard10	0.535551	0.00175846	0.0257031	-0.0204325	0.905257	0.98758	-0.0487955	0.776359	0.999991	-0.66911	0.000105327	0.000457932	24.673	32.917	24.294	23.165	15.18	1
59045	NM_021547	Stard3	0.30004	0.00136424	0.021145	0.208286	0.0263935	0.311411	0.0781639	0.405983	0.999991	0.804675	6.17537e-18	1.29706e-16	20.22	22.801	23.407	20.622	35.005	1
20846	NM_001205314	Stat1	-0.41769	0.00582338	0.0648885	-0.619792	4.30399e-05	0.00239967	-0.237249	0.117222	0.999991	0.590356	9.55753e-05	0.00041895	39.91	27.222	25.844	32.639	59.729	1
20849	NM_011487	Stat4	-0.587807	0.000668086	0.012073	-0.685146	7.37805e-05	0.00372436	-0.0610698	0.723207	0.999991	-0.567098	0.00102935	0.00352498	17.189	10.352	10.592	15.959	11.318	1
20869	NM_011492	Stk11	0.336476	0.00225578	0.0314743	0.164268	0.136125	0.694767	0.203237	0.0652184	0.999991	0.332487	0.00254577	0.00787306	50.301	58.206	56.53	56.181	62.752	1
74152	NM_028788	Stra6l	3.84691	1.42973e-16	2.5175e-14	-0.0974438	0.850703	0.980271	-0.41569	0.431964	0.999991	4.25502	5.13516e-20	1.25198e-18	0.015	0.551	0.013	0.004	0.817	0
72149	NM_001252448	Strada	0.435945	2.80176e-05	0.000802022	0.0478274	0.648022	0.950822	0.110745	0.290566	0.999991	0.689337	3.03452e-11	3.6035e-10	9.749	12.085	10.14	10.214	15.581	1
320609	NM_177204	Strip2	-0.646979	0.00696786	0.0740377	-0.168943	0.480475	0.920652	-0.0993548	0.678199	0.999991	-2.47548	1.94513e-24	6.4435e-23	7.55	4.339	6.755	6.757	1.226	1
58244	NM_021433	Stx6	0.396018	0.000897155	0.0151964	-0.0248726	0.835199	0.979392	0.0962366	0.420698	0.999991	0.640091	7.72581e-08	6.15756e-07	21.69	26.157	21.379	22.553	33.526	1
53331	NM_016797	Stx7	0.720466	6.38347e-05	0.00164396	0.281197	0.119478	0.656927	-0.0841972	0.642083	0.999991	1.98842	1.65611e-28	6.8956e-27	8.482	12.912	10.409	7.723	34.283	1
56451	NM_019879	Suclg1	0.479024	0.00176397	0.0257537	-0.154539	0.313758	0.871381	-0.0559141	0.71548	0.999991	0.269241	0.078938	0.151691	58.737	75.167	52.653	54.974	70.064	1
57429	NM_020564	Sult5a1	-1.62249	0.000337809	0.00675752	1.3694	0.00188001	0.0483264	-0.328099	0.46083	0.999991	-2.59603	2.35003e-08	2.02007e-07	1.74	0.392	5.191	1.251	0.152	1
66329	NM_025491	Susd3	0.922535	0.000131488	0.00302602	-1.16169	2.50593e-06	0.000219552	0.23356	0.335414	0.999991	1.22247	3.91459e-07	2.79396e-06	7.37	13.145	3.156	8.416	17.65	1
75744	NM_001160345	Svip	0.853457	0.00122989	0.0197295	-0.10768	0.690508	0.956445	0.22665	0.398224	0.999991	1.26732	1.37413e-06	8.94973e-06	0.627	1.075	0.582	0.722	1.574	1
20947	NM_009302	Swap70	0.559754	0.008252	0.0836973	-0.0477777	0.821743	0.979392	-0.0213647	0.919755	0.999991	0.982396	3.52337e-06	2.12404e-05	18.336	24.986	17.815	17.543	36.541	1
20963	NM_001198977	Syk	0.5772	0.00158166	0.0239751	-0.932214	3.67262e-07	3.97816e-05	-0.27733	0.129661	0.999991	1.64868	1.67819e-19	3.95726e-18	15.44	21.238	8.014	12.366	49.024	1
64009	NM_001079686	Syne1	-0.472302	0.0031451	0.040191	0.259369	0.102898	0.619693	0.291237	0.0671152	0.999991	0.368452	0.0204486	0.0481092	2.842	2.053	3.848	3.357	3.821	1
20973	NM_009304	Syngr2	0.401554	0.00284699	0.0373911	0.202757	0.132136	0.684735	0.255962	0.0573375	0.999991	1.08858	5.47093e-16	1.00595e-14	52.365	63.499	60.47	61.217	111.057	1
269589	NM_031393	Sytl1	-0.813191	2.9925e-07	1.44317e-05	-0.227348	0.150853	0.720254	0.038292	0.808686	0.999991	-1.39992	1.60399e-18	3.51644e-17	32.43	16.707	27.545	32.397	11.923	1
83671	NM_001289583	Sytl2	-0.970844	0.00346321	0.0435577	0.174626	0.596373	0.942578	0.201338	0.541518	0.999991	0.564187	0.0866339	0.164281	1.553	0.711	2.011	1.849	2.473	1
83672	NM_031395	Sytl3	-1.01737	9.8434e-14	1.29616e-11	-0.154371	0.256898	0.831258	0.0555	0.68343	0.999991	-2.23147	1.3938e-58	2.21533e-56	41.494	18.573	37.273	41.619	8.517	1
27359	NM_013757	Sytl4	1.20127	0.00613421	0.0676675	-1.05456	0.0238758	0.295854	0.68211	0.123321	0.999991	0.609529	0.16874	0.28293	0.111	0.282	0.039	0.195	0.188	1
225895	NM_146092	Taf6l	0.320922	0.00490523	0.0574033	0.0222468	0.846128	0.979674	0.105479	0.357416	0.999991	0.0718776	0.530487	0.667196	10.017	11.47	10.195	10.493	10.403	0
21351	NM_011528	Taldo1	0.863651	6.32454e-12	6.55976e-10	-0.0724757	0.564764	0.937022	0.0409633	0.744832	0.999991	1.23461	8.57038e-23	2.52079e-21	119.123	199.397	113.077	119.178	279.391	1
213233	NM_145391	Tapbpl	-0.426976	0.000611733	0.0111474	-0.0256369	0.836348	0.979392	-0.0151479	0.902911	0.999991	0.152682	0.218022	0.347632	18.949	12.856	18.639	18.1	20.855	0
110326	NM_031867	Tas1r1	-1.30072	2.63541e-07	1.28735e-05	-0.0170421	0.943305	0.994011	-0.0426445	0.859139	0.999991	-2.24856	1.33699e-16	2.58787e-15	1.084	0.38	1.073	1.021	0.195	0
75812	NM_175225	Tasp1	-0.559239	0.00167182	0.0248482	-0.200178	0.258707	0.831258	0.0134704	0.939338	0.999991	-1.74453	9.25911e-22	2.5637e-20	8.389	5.121	7.295	8.207	2.358	1
70296	NM_146252	Tbc1d13	0.325425	0.00189237	0.027188	-0.0875281	0.404634	0.905371	0.087596	0.403929	0.999991	0.0987187	0.346723	0.492002	20.26	23.245	19.131	20.885	21.444	1
224617	NM_173186	Tbc1d24	0.640603	0.00354699	0.0443535	0.196071	0.374326	0.897557	0.22142	0.316008	0.999991	1.4295	6.11403e-11	7.02328e-10	0.915	1.357	1.089	1.062	2.529	1
210789	NM_001081278	Tbc1d4	0.736354	6.56043e-07	2.87955e-05	-0.0359538	0.809202	0.979392	0.30324	0.0412234	0.999991	1.75892	8.22921e-33	4.15991e-31	3.707	5.694	3.632	4.446	12.595	1
54610	NM_018775	Tbc1d8	0.72575	2.01852e-11	1.98484e-09	0.207167	0.0586811	0.483012	0.352549	0.00126512	0.364697	1.41402	8.4456e-40	6.2324e-38	3.108	4.724	3.603	3.843	8.25	1
66411	NM_025548	Tbcb	0.431821	0.00388953	0.047769	0.131292	0.380918	0.899935	0.0120722	0.935872	0.999991	0.33744	0.0241664	0.0554723	27.423	33.976	30.073	26.865	34.373	0
108903	NM_029878	Tbcd	0.35251	0.00461965	0.0546099	-0.112217	0.368181	0.893836	0.0890349	0.474968	0.999991	0.0857996	0.49108	0.631568	18.967	22.197	17.592	19.616	19.922	1
213773	NM_145396	Tbl3	0.453653	0.000292532	0.00599433	0.15026	0.231032	0.807259	0.157024	0.210888	0.999991	-0.374403	0.00295186	0.00894159	20.617	25.911	22.954	22.363	15.684	1
83993	NM_032005	Tbx19	-1.79885	3.77146e-11	3.61463e-09	-0.598029	0.0186966	0.25488	-0.229579	0.361509	0.999991	-3.56534	5.41816e-27	2.06364e-25	1.037	0.248	0.674	0.855	0.055	1
57765	NM_019507	Tbx21	2.51727	2.37562e-15	3.64985e-13	0.652569	0.0499369	0.442314	-0.402994	0.255452	0.999991	4.35706	6.51167e-44	6.22184e-42	0.185	1.18	0.314	0.123	4.913	1
21390	NM_009325	Tbxa2r	-0.918213	0.00862943	0.0864087	0.832068	0.0170568	0.240989	0.0514822	0.882754	0.999991	-3.31315	9.10305e-21	2.35852e-19	14.784	6.719	27.739	15.011	1.119	1
21391	NM_011539	Tbxas1	1.99957	4.39487e-07	2.00456e-05	-1.51728	0.00043167	0.0157955	-0.914881	0.0295076	0.999991	2.5982	4.56259e-11	5.31124e-10	0.361	1.618	0.085	0.148	2.77	1
67344	NM_001163768	Tctex1d1	-1.09753	1.553e-05	0.000482897	-0.446629	0.0730099	0.538699	-0.19072	0.442023	0.999991	-4.64576	3.34016e-39	2.32965e-37	2.256	0.925	1.63	1.897	0.036	1
66061	NM_025329	Tctex1d2	1.23001	2.94773e-07	1.42612e-05	-0.620148	0.0137999	0.208375	-0.415885	0.0967797	0.999991	2.49744	6.22015e-26	2.26474e-24	3.913	8.758	2.461	2.812	23.519	1
100121	NM_146142	Tdrd7	1.17332	0.0056792	0.0635663	0.382042	0.368683	0.894496	0.104341	0.806277	0.999991	2.25512	1.02324e-07	8.01997e-07	1.052	2.502	1.453	1.125	6.416	1
70381	NM_027410	Tecpr1	-1.20506	9.24151e-14	1.22758e-11	0.463512	0.00393998	0.0851189	0.285327	0.0761044	0.999991	-0.644815	6.39729e-05	0.000291958	18.451	7.201	25.769	21.803	11.546	1
21745	NM_009351	Tep1	0.696156	0.00133263	0.0208256	-0.295223	0.174739	0.754167	-0.017568	0.935587	0.999991	2.91669	2.2534e-41	1.82592e-39	4.016	6.05	3.272	3.847	31.983	1
211586	NM_001184706	Tfdp2	-0.629016	0.00187738	0.0270671	0.241095	0.231893	0.808283	0.222563	0.269889	0.999991	-0.929764	4.49368e-06	2.64909e-05	5.085	2.97	6.175	5.818	2.596	1
209446	NM_172472	Tfe3	0.581226	0.00282446	0.0371597	0.0984702	0.613843	0.946814	0.243656	0.211613	0.999991	1.34177	4.78071e-12	6.07419e-11	5.79	8.016	6.265	6.745	14.896	1
21426	NM_031198	Tfec	3.8005	3.07039e-15	4.60346e-13	-0.254148	0.646385	0.950527	0.248593	0.645755	0.999991	3.96343	1.7539e-16	3.35168e-15	0.009	0.662	0	0.017	0.813	1
21803	NM_011577	Tgfb1	0.607832	0.000138105	0.00314013	-0.326755	0.0407025	0.399797	-0.1141	0.474733	0.999991	1.22655	1.41785e-14	2.31135e-13	66.956	93.916	53.392	60.175	157.06	1
21810	NM_009369	Tgfbi	1.88697	9.61657e-07	4.0451e-05	0.374174	0.340315	0.882794	-0.111725	0.778611	0.999991	6.28874	4.02625e-61	7.00568e-59	0.261	1.103	0.36	0.222	34.009	1
21816	NM_001161715	Tgm1	1.18358	8.38693e-05	0.00207522	-0.302187	0.321537	0.872945	-1.28007	3.881e-05	0.0269225	0.842893	0.00518923	0.0146463	1.438	3.169	1.153	0.524	2.65	1
21817	NM_009373	Tgm2	2.90194	2.00512e-24	8.20634e-22	0.194432	0.511848	0.928377	0.377583	0.201165	0.999991	7.13491	7.89633e-141	6.86981e-138	0.329	2.64	0.385	0.421	61.739	1
230787	NM_001033308	Themis2	2.11692	4.73495e-15	7.02954e-13	-0.919644	0.000754681	0.0242712	-0.582087	0.0326446	0.999991	3.71759	3.85715e-43	3.50322e-41	5.389	23.161	2.754	3.404	80.204	1
386612	NM_001008425	Thoc6	0.323751	0.00904555	0.0892643	0.202943	0.102206	0.617751	0.117669	0.3442	0.999991	-0.289553	0.0205337	0.0482888	19.701	22.585	22.713	20.81	15.877	0
21834	NM_001113417	Thrb	-1.36253	0.000333828	0.00669557	-0.662827	0.0799639	0.561016	-0.0899683	0.811863	0.999991	-2.9408	2.62565e-14	4.15729e-13	1.878	0.594	1.132	1.712	0.179	1
77862	NM_144543	Thyn1	0.466119	0.00192279	0.0275728	-0.00856609	0.954681	0.995097	0.129747	0.389127	0.999991	-0.0454384	0.763182	0.850037	31.502	39.969	31.347	33.637	30.128	1
319801	NM_177003	Tigar	0.511979	0.0103244	0.0988377	-0.158388	0.431421	0.910092	-0.0888236	0.65907	0.999991	0.786342	7.87441e-05	0.00035208	2.348	3.092	2.108	2.144	4.066	1
30055	NM_013895	Timm13	0.49645	0.00434312	0.0519493	0.374258	0.0315947	0.343425	0.190307	0.274718	0.999991	-0.0604651	0.728726	0.825689	43.547	56.56	56.58	48.312	41.188	1
21881	NM_009388	Tkt	0.796901	1.22944e-10	1.07615e-08	-0.229673	0.0637907	0.505496	-0.111764	0.367026	0.999991	0.260561	0.0354099	0.0772707	146.17	233.433	124.833	131.966	173.357	1
21897	NM_030682	Tlr1	1.57008	4.27621e-07	1.96226e-05	-0.615617	0.0530474	0.458666	-0.232142	0.463053	0.999991	2.82023	7.53531e-20	1.81308e-18	1.015	3.001	0.638	0.821	8.151	1
384059	NM_205823	Tlr12	-0.899813	0.000201341	0.00436181	0.399466	0.0974389	0.607698	-0.133762	0.579492	0.999991	-1.18447	1.03526e-06	6.88089e-06	9.383	4.466	12.537	8.287	3.929	1
24088	NM_011905	Tlr2	0.707227	2.84908e-06	0.000105485	-0.246208	0.121333	0.662943	-0.161653	0.308566	0.999991	2.22325	8.51911e-53	1.13565e-50	1.205	1.82	1.016	1.038	5.716	1
21898	NM_021297	Tlr4	1.27623	0.000501913	0.00948019	-0.113521	0.768715	0.974194	-0.741558	0.0656614	0.999991	3.6028	4.7405e-24	1.52156e-22	0.051	0.131	0.046	0.024	0.817	1
21899	NM_011604	Tlr6	0.786692	0.00305474	0.0393016	-0.584343	0.0331012	0.354045	-0.249338	0.359167	0.999991	1.79781	7.84084e-12	9.76707e-11	0.943	1.539	0.615	0.761	3.465	1
81897	NM_031178	Tlr9	2.69256	6.62648e-23	2.28056e-20	-1.88326	1.09771e-09	2.19513e-07	-2.12971	1.80873e-11	5.12715e-08	5.11234	6.59613e-79	1.94704e-76	0.566	3.739	0.127	0.097	23.331	1
67623	NM_026281	Tm7sf3	0.492881	0.00251039	0.0340634	-0.164065	0.316253	0.872763	0.0658779	0.687066	0.999991	0.298756	0.067274	0.132519	9.087	11.756	8.115	9.288	11.105	1
66282	NM_025465	Tma16	0.440219	0.000756938	0.0133498	-0.14773	0.264365	0.838123	-0.00535709	0.967658	0.999991	-0.751588	2.59412e-08	2.21721e-07	11.885	14.81	10.75	11.503	6.91	1
353499	NM_181820	Tmc4	0.745054	0.010074	0.0971037	-0.00513366	0.98597	0.995097	0.261876	0.368483	0.999991	1.66131	7.90239e-09	7.19309e-08	1.485	2.367	1.485	1.74	4.997	1
74424	NM_001105252	Tmc5	1.23694	2.55733e-08	1.4952e-06	-1.37788	5.52759e-09	9.57993e-07	-0.127491	0.574339	0.999991	2.6159	1.63107e-32	8.07235e-31	1.183	2.637	0.43	1.056	7.636	1
217353	NM_145439	Tmc6	-0.443007	3.54485e-06	0.00012842	0.122023	0.198735	0.777159	0.141745	0.13566	0.999991	-0.310116	0.00115374	0.00389608	20.427	13.723	22.27	21.765	16.27	1
209760	NM_172476	Tmc7	1.29817	0.00401853	0.0489563	-0.0637223	0.893292	0.986107	0.0683571	0.885225	0.999991	1.44322	0.00133779	0.004453	0.036	0.108	0.034	0.038	0.133	1
217356	NM_001195089	Tmc8	-0.727604	7.2201e-11	6.74901e-09	0.123673	0.264102	0.837459	0.239053	0.0308293	0.999991	-0.579271	2.04342e-07	1.53472e-06	20.603	11.327	22.562	23.665	13.569	1
66111	NM_025360	Tmed3	0.796071	3.45993e-05	0.000961964	-0.124534	0.518893	0.929885	0.0752453	0.696505	0.999991	0.657949	0.000625194	0.00227031	17.628	28.389	16.09	18.001	27.853	1
217203	NM_144830	Tmem106a	0.868706	0.00480591	0.056503	0.436174	0.160226	0.738742	-0.272996	0.389643	0.999991	3.40863	1.51064e-29	6.57129e-28	0.595	1.054	0.833	0.458	7.44	1
81907	NM_178638	Tmem108	0.957475	0.000118398	0.00277969	-0.593871	0.0176214	0.245849	-0.257094	0.303457	0.999991	-2.00341	3.06334e-15	5.2857e-14	4.875	8.922	3.178	3.978	1.12	1
330189	NM_001039723	Tmem120b	-0.526802	2.03263e-05	0.00060353	0.26447	0.0285879	0.32629	-0.0883304	0.469555	0.999991	-1.17292	3.52893e-20	8.77191e-19	7.247	4.58	8.754	6.628	3.131	1
69804	NM_027215	Tmem147	0.586251	1.46577e-05	0.000459548	0.269459	0.0469268	0.429053	0.107802	0.427685	0.999991	0.507097	0.000179874	0.000739999	31.166	43.011	37.609	32.51	43.886	1
75712	NM_001290679	Tmem14a	0.938906	0.000149921	0.00337835	0.00897443	0.971744	0.995097	-0.317905	0.216183	0.999991	2.43413	1.58151e-23	4.8773e-22	1.658	2.957	1.702	1.221	9.59	1
66154	NM_025387	Tmem14c	0.299417	0.0057397	0.0641239	-0.0207882	0.848258	0.980097	0.0398934	0.7135	0.999991	0.343428	0.00153141	0.00501967	60.513	68.188	59.635	60.327	75.932	1
72512	NM_028261	Tmem173	0.782163	2.29389e-05	0.000674492	-0.235384	0.203359	0.78128	-0.0642367	0.728427	0.999991	1.23305	2.42378e-11	2.90537e-10	31.692	50.7	27.103	29.349	75.588	1
66058	NM_025326	Tmem176a	-0.612725	0.000442728	0.00856224	-0.349268	0.0445968	0.415544	0.134651	0.437085	0.999991	0.212449	0.219732	0.349415	19.857	11.761	15.534	21.104	22.775	1
65963	NM_001164209	Tmem176b	-0.552068	0.00333484	0.0421884	-0.39967	0.0334898	0.356326	-0.0177845	0.924543	0.999991	0.0188418	0.920051	0.952084	43.658	27.219	33.456	41.73	44.494	1
226351	NM_146103	Tmem185b	0.549571	8.90367e-06	0.000296326	0.0353607	0.777276	0.976397	0.131672	0.291912	0.999991	1.04702	1.57644e-17	3.24919e-16	4.866	6.541	5.009	5.168	10.019	0
195040	NM_199199	Tmem199	0.370311	0.000355842	0.00708062	0.162912	0.118464	0.654787	0.0372577	0.722813	0.999991	0.346134	0.000859454	0.00301055	10.286	12.188	11.542	10.221	12.933	1
56277	NM_019631	Tmem45a	-1.39372	0.00654261	0.0706164	-0.362507	0.47716	0.920652	-0.383249	0.452469	0.999991	-1.24489	0.0150646	0.0368923	1.088	0.276	0.797	0.76	0.348	0
77975	NM_030018	Tmem50b	-0.499736	0.000831778	0.0142943	-0.225324	0.131286	0.682146	-0.0818594	0.583405	0.999991	-0.376016	0.0118698	0.030061	25.274	16.247	21.674	23.203	19.189	1
214359	NM_145402	Tmem51	1.89626	1.21205e-12	1.3697e-10	0.130265	0.649183	0.95087	-0.083523	0.774735	0.999991	5.71134	5.46707e-108	2.73113e-105	0.367	1.395	0.407	0.332	23.422	1
67893	NM_026436	Tmem86a	1.11674	2.02905e-05	0.00060353	0.235343	0.376461	0.898706	0.286249	0.282268	0.999991	2.30869	5.4485e-19	1.24158e-17	1.259	2.621	1.507	1.484	6.746	1
69071	NM_133706	Tmem97	0.39544	0.00441833	0.052641	-0.0850396	0.541606	0.934509	-0.0142992	0.918253	0.999991	-0.712342	3.71116e-07	2.65795e-06	30.065	36.287	28.391	28.985	18.036	1
140765	NM_001163776	Tmprss3	1.76914	7.02841e-06	0.000239171	0.816949	0.0398011	0.393446	1.08705	0.00610546	0.81765	2.39753	9.9944e-10	1.01479e-08	0.283	1.068	0.57	0.639	1.877	0
21929	NM_009397	Tnfaip3	-0.52101	0.00127941	0.0202236	0.287771	0.0738286	0.540647	0.273113	0.0899025	0.999991	0.111463	0.489107	0.62972	7.908	5.009	9.747	9.314	8.467	1
72049	NM_028075	Tnfrsf13c	2.25258	2.05785e-06	7.94951e-05	0.982981	0.0434012	0.411917	0.187051	0.709054	0.999991	4.29183	4.11284e-20	1.01622e-18	0.049	0.423	0.152	0.06	2.332	1
21936	NM_009400	Tnfrsf18	-0.67865	0.00600266	0.0665336	0.378052	0.123334	0.668987	0.335172	0.172116	0.999991	-0.0489843	0.842108	0.902059	14.033	7.883	18.641	17.263	13.514	1
21938	NM_011610	Tnfrsf1b	-0.471227	0.00250643	0.0340601	-0.50114	0.00130863	0.0370478	-0.0605704	0.697336	0.999991	-0.399086	0.0104605	0.0269436	17.187	11.265	12.129	15.97	12.817	1
79201	NM_024290	Tnfrsf23	1.09516	0.00018712	0.00411854	0.173951	0.557379	0.93664	-0.0648746	0.827736	0.999991	3.02279	2.23872e-25	7.87364e-24	0.757	1.566	0.872	0.694	6.958	1
21943	NM_011613	Tnfsf11	-0.734361	0.00122991	0.0197295	-0.360063	0.112563	0.643273	0.0417886	0.85375	0.999991	-1.85642	5.02697e-16	9.25344e-15	16.627	8.95	12.913	16.595	4.3	1
22164	NM_009452	Tnfsf4	1.59234	0.00164626	0.0246639	0.130377	0.80287	0.979392	0.562164	0.27688	0.999991	3.27452	5.03556e-11	5.82898e-10	0.067	0.324	0.081	0.129	1.424	1
665113	NM_001163008	Tnik	-0.542356	0.00751241	0.0786181	-0.202886	0.316798	0.872763	0.190354	0.347233	0.999991	-1.41205	4.20721e-12	5.40443e-11	7.804	4.75	6.499	8.604	2.796	1
414084	NM_001001495	Tnip3	1.4877	3.44178e-06	0.000125587	0.395436	0.239251	0.817309	-0.405252	0.256684	0.999991	2.99482	5.75794e-22	1.62145e-20	0.107	0.314	0.148	0.071	1.023	1
21953	NM_009405	Tnni2	1.38359	2.70969e-08	1.57214e-06	-0.244679	0.343147	0.884928	-0.104067	0.686088	0.999991	3.145	1.60241e-37	1.05529e-35	3.272	8.241	2.722	2.953	31.758	1
21959	NM_013694	Tnp2	1.51534	7.95493e-08	4.25659e-06	-0.396228	0.182025	0.763913	-0.138855	0.637375	0.999991	2.30764	1.69248e-16	3.24932e-15	2.454	6.91	1.81	2.133	13.321	1
217169	NM_172564	Tns4	-1.49107	0.00644488	0.0700107	-1.17207	0.0317193	0.34406	-0.421683	0.437438	0.999991	-0.705599	0.194481	0.317508	0.271	0.054	0.087	0.179	0.137	1
53333	NM_001109748	Tomm40	0.454828	0.000459387	0.00886179	0.205491	0.113739	0.645501	0.169726	0.191605	0.999991	-0.370281	0.00447109	0.0128803	50.869	64.061	59.008	55.743	38.872	1
68512	NM_001134646	Tomm5	0.472103	0.00172187	0.0253696	0.173771	0.249302	0.826034	-0.0162674	0.914248	0.999991	-0.427622	0.00475536	0.0135691	58.422	74.405	66.055	55.971	42.719	1
30935	NM_023141	Tor3a	0.695195	0.000236063	0.00500658	0.0627708	0.742796	0.969889	-0.000696752	0.997103	0.999991	1.64354	1.60306e-18	3.51644e-17	1.744	2.621	1.828	1.697	5.558	1
269389	NM_001098799	Tox2	-1.17088	0.00299065	0.0386411	0.87374	0.0257519	0.308013	0.422176	0.281721	0.999991	-1.88697	1.96381e-06	1.24374e-05	4.892	1.763	9.803	6.63	1.066	1
244579	NM_172913	Tox3	-1.42707	8.16654e-09	5.30755e-07	-0.689252	0.00474646	0.0979304	-0.26456	0.276178	0.999991	-3.74014	4.85087e-41	3.85504e-39	2.714	0.88	1.657	2.197	0.16	1
252972	NM_145853	Tpcn1	-0.810102	4.05573e-07	1.88972e-05	-0.902519	1.68367e-08	2.57469e-06	0.144368	0.365093	0.999991	-1.07408	1.98732e-11	2.39086e-10	16.051	8.289	8.54	17.322	7.439	1
22022	NM_009419	Tpst2	0.513391	0.000994145	0.016507	0.343069	0.0279033	0.320733	-0.00768413	0.960795	0.999991	0.63697	4.39043e-05	0.000207354	24.59	32.273	31.45	23.677	38.071	1
103213	NM_134000	Traf3ip2	-0.552321	0.00272575	0.036207	0.010842	0.952878	0.995097	0.167788	0.360193	0.999991	-0.963595	1.9536e-07	1.47188e-06	7.982	4.93	8.072	8.705	3.979	1
22033	NM_011633	Traf5	0.736783	0.000985746	0.0164215	-0.335802	0.141535	0.705549	-0.273013	0.23211	0.999991	1.75571	2.21035e-15	3.86635e-14	1.96	3.051	1.54	1.548	6.835	1
77647	NM_198297	Trat1	-1.15271	0.000139309	0.00316275	-1.15026	0.000143937	0.00638111	-0.0577151	0.848455	0.999991	-3.60627	9.70533e-32	4.59682e-30	61.74	23.998	26.548	57.428	4.078	1
224840	NM_001033922	Treml4	3.78972	7.50727e-18	1.6718e-15	-0.017069	0.973956	0.995097	0.0313196	0.952293	0.999991	8.27374	2.88336e-82	1.05916e-79	0.004	0.632	0.004	0.004	18.031	1
22040	NM_001012236	Trex1	0.701956	0.0029582	0.0383527	0.00235073	0.992097	0.996762	-0.189157	0.426582	0.999991	2.34415	1.91562e-23	5.8531e-22	8.898	13.504	8.875	7.553	47.606	1
217410	NM_144551	Trib2	0.89268	8.27324e-05	0.00205717	0.288655	0.204198	0.781603	0.222857	0.32731	0.999991	0.565012	0.0128413	0.0321274	3.51	6.104	4.327	3.996	5.216	1
21848	NM_145076	Trim24	-0.469731	0.00178001	0.0258931	-0.323526	0.0312222	0.341616	-0.0602013	0.688185	0.999991	-0.283172	0.0593351	0.119291	7.227	4.739	5.812	6.71	5.825	1
244183	NM_175648	Trim30b	2.63387	7.51623e-09	4.9272e-07	-0.0905582	0.851463	0.980271	-0.229105	0.638641	0.999991	4.90474	1.56982e-27	6.28308e-26	0.056	0.556	0.049	0.039	3.542	1
381485	NM_001081281	Trim55	1.60166	0.00012658	0.00293537	-1.42127	0.00145897	0.0400055	-0.443708	0.304635	0.999991	2.54196	9.65028e-10	9.81052e-09	0.386	1.304	0.098	0.25	2.933	1
208820	NM_001171801	Triqk	1.43718	0.00621119	0.068206	0.611006	0.253729	0.830744	0.445433	0.408579	0.999991	3.89316	3.07909e-14	4.85198e-13	0.036	0.2	0.092	0.072	1.743	1
15547	NM_001081000	Trmt2a	0.489854	4.73406e-05	0.00125768	0.0111519	0.926345	0.990345	-0.0503762	0.676442	0.999991	0.250233	0.0378732	0.0818144	21.288	27.419	21.507	19.88	25.082	1
70047	NM_001242358	Trnt1	0.595343	1.94013e-05	0.000582924	-0.0296924	0.831816	0.979392	0.0690836	0.621166	0.999991	-0.133203	0.341134	0.485949	19.077	26.455	18.798	19.478	17.171	1
60599	NM_001199105	Trp53inp1	-0.850958	7.40026e-06	0.00025126	0.395759	0.036909	0.378257	0.00901393	0.962104	0.999991	-1.36801	6.08481e-13	8.40986e-12	33.706	16.821	44.974	33.015	12.602	1
28240	NM_138301	Trpm2	1.44832	3.47982e-06	0.000126671	-0.262893	0.433948	0.910095	-0.396416	0.244572	0.999991	4.19516	7.89767e-44	7.50279e-42	0.076	0.214	0.062	0.053	1.731	1
194352	NM_001007572	Trpv5	-1.68862	0.0028095	0.036995	-0.146089	0.787491	0.977541	0.0483061	0.928796	0.999991	-1.46697	0.00901225	0.023684	0.098	0.005	0.085	0.098	0.012	0
436522	NM_001038996	Try10	1.70178	0.00440877	0.0525685	0.158014	0.793748	0.978499	0.300405	0.618942	0.999991	1.1415	0.0570339	0.115267	0.026	0.361	0.043	0.052	0.207	0
66078	NM_001164204	Tsen34	0.492852	0.00974708	0.0944338	-0.0253117	0.894635	0.986177	-0.0394433	0.836566	0.999991	0.990307	1.98094e-07	1.49044e-06	19.076	25.104	19.006	18.052	39.077	0
76265	NM_029557	Tsen54	0.469019	0.000236623	0.00501145	0.118837	0.354028	0.889662	0.0631788	0.622949	0.999991	0.0283275	0.825486	0.892421	9.282	11.797	10.108	9.429	9.357	1
66109	NM_025359	Tspan13	-0.468335	0.00145526	0.0222821	-0.204049	0.165293	0.744708	0.0906297	0.53762	0.999991	-1.0429	1.4278e-12	1.91106e-11	118.974	78.172	103.112	122.325	56.317	1
70747	NM_027533	Tspan2	-0.78693	9.1958e-05	0.00223518	-0.0988821	0.622848	0.947856	0.0791103	0.69394	0.999991	-1.60077	1.98478e-15	3.47915e-14	33.86	17.637	31.723	34.727	10.672	1
27027	NM_020286	Tspan32	-1.51561	1.45551e-05	0.000457278	0.639298	0.0630691	0.503634	0.196904	0.567801	0.999991	-1.06414	0.00221368	0.00694945	3.691	1.045	5.996	4.153	1.599	1
232670	NM_001301407	Tspan33	0.828142	0.00718567	0.0756694	0.606849	0.050199	0.443003	-0.199625	0.532874	0.999991	3.52093	4.18991e-32	2.01922e-30	0.461	0.795	0.738	0.385	6.271	1
56224	NM_019571	Tspan5	0.795173	7.70303e-09	5.02789e-07	-0.13045	0.3481	0.888342	-0.0943821	0.497447	0.999991	0.222916	0.107408	0.196443	6.651	10.63	6.085	6.039	7.695	1
216350	NM_146010	Tspan8	2.14377	1.46147e-08	9.14509e-07	-0.622756	0.131705	0.683638	0.274184	0.489297	0.999991	4.57643	1.15373e-34	6.39972e-33	0.259	1.368	0.144	0.313	9.235	1
109246	NM_175414	Tspan9	-0.665395	0.00280563	0.0369761	-0.516973	0.0202303	0.266513	-0.119235	0.592161	0.999991	-1.95102	2.28125e-18	4.9422e-17	37.778	21.387	26.144	33.616	9.209	1
225049	NM_028639	Ttc7	0.60253	7.31579e-05	0.00185256	-0.26721	0.0791477	0.559044	0.0678946	0.655326	0.999991	0.908511	2.2049e-09	2.149e-08	21.583	30.144	17.965	22.091	40.47	1
101100	NM_001142732	Ttll3	0.492096	0.00505631	0.0586277	0.149988	0.393422	0.902216	-0.0218695	0.901073	0.999991	1.06903	1.0678e-09	1.07955e-08	25.429	32.961	28.239	24.281	53.548	0
74711	NM_001083618	Ttll9	-0.713395	0.00148252	0.0226766	-0.193513	0.381678	0.899935	-0.0108009	0.960957	0.999991	-3.06967	2.90283e-31	1.34409e-29	1.613	0.881	1.397	1.552	0.156	1
117160	NM_053273	Ttyh2	1.66786	9.11823e-09	5.80157e-07	0.0982265	0.737644	0.969019	-0.0640209	0.827629	0.999991	3.10584	6.88637e-27	2.60767e-25	1.207	3.788	1.31	1.105	11.793	1
383103	NM_001013778	Tvp23a	0.364859	0.00138869	0.0213666	0.261981	0.0219384	0.280793	0.152575	0.183544	0.999991	0.382957	0.000793424	0.00280661	5.709	6.738	6.865	6.146	7.375	1
23999	NM_011876	Twf2	0.717028	1.00365e-06	4.1984e-05	-0.0983833	0.503134	0.925405	-0.115626	0.431484	0.999991	1.62361	1.40464e-28	5.87817e-27	44.484	67.337	41.464	39.832	137.576	1
353170	NM_178935	Txlng	-0.40572	0.00243369	0.0333175	0.412619	0.00188913	0.0484649	0.025492	0.84835	0.999991	-1.00349	1.1161e-13	1.66058e-12	8.082	5.556	10.851	7.972	3.938	1
56551	NM_019913	Txn2	0.376828	0.00798612	0.0820397	0.109226	0.442275	0.911122	0.0886542	0.532974	0.999991	0.205812	0.147597	0.254514	65.625	78.188	70.894	67.898	74.948	1
22177	NM_011662	Tyrobp	2.33783	5.07033e-11	4.79875e-09	-0.189042	0.596882	0.942779	-0.740874	0.0387342	0.999991	5.05042	8.94689e-46	9.30138e-44	14.673	80.436	12.701	7.826	670.356	1
227620	NM_001033293	Uap1l1	0.735112	0.00138821	0.0213666	0.685331	0.00289056	0.0671936	0.436981	0.0583586	0.999991	2.12302	1.27068e-20	3.26661e-19	3.317	5.155	5.442	4.408	15.132	0
319370	NM_176902	Ubald2	-0.366773	0.00863732	0.0864087	0.23186	0.096408	0.604653	0.0788864	0.571819	0.999991	-0.784641	2.0308e-08	1.75847e-07	78.494	55.415	92.364	80.719	44.7	1
22209	NM_019668	Ube2a	0.867023	7.565e-11	6.98517e-09	0.0195851	0.883968	0.984451	0.0521001	0.697978	0.999991	0.529326	7.39709e-05	0.000332537	14.366	24.114	14.58	14.513	20.534	1
76508	NR_015577	Ube2d-ps	0.521442	0.00288159	0.03778	0.301054	0.0890854	0.58664	0.174813	0.329216	0.999991	0.593522	0.000674574	0.00242618	1.219	1.619	1.518	1.333	1.841	1
218793	NM_144839	Ube2e2	1.90386	1.07267e-07	5.52497e-06	-0.240308	0.507199	0.92739	-0.024845	0.94526	0.999991	2.64807	1.3523e-13	1.99942e-12	2.216	8.748	1.853	2.064	16.603	1
67921	NM_026454	Ube2f	0.347864	0.000196658	0.00427257	0.194442	0.0380709	0.383611	0.18605	0.0476118	0.999991	0.479256	2.74065e-07	2.01975e-06	16.96	19.765	19.468	18.771	23.383	1
22213	NM_019803	Ube2g2	0.298692	0.000709552	0.0127458	0.0498566	0.573125	0.937661	0.0521619	0.55589	0.999991	0.406142	4.06802e-06	2.42147e-05	25.54	28.755	26.493	25.647	33.473	1
22192	NM_145578	Ube2m	0.308611	0.0104326	0.0996097	0.169986	0.158512	0.735414	0.0814377	0.499558	0.999991	-0.232782	0.0538674	0.109997	77.258	87.668	87.094	79.503	64.808	1
70093	NM_027315	Ube2q1	0.52793	3.00695e-05	0.000852702	0.109515	0.387333	0.900177	0.131643	0.298836	0.999991	0.792445	3.66609e-10	3.9249e-09	26.308	34.791	28.486	28.075	45.293	1
66799	NM_025773	Ube2w	0.711225	9.70564e-05	0.00234033	0.077893	0.6713	0.953982	-0.0578682	0.753169	0.999991	0.743331	4.62229e-05	0.00021762	3.879	5.87	4.098	3.607	6.492	1
79560	NM_024475	Ublcp1	0.862858	3.58249e-07	1.70393e-05	0.941394	2.68204e-08	3.94665e-06	0.243465	0.157637	0.999991	1.6521	6.51779e-23	1.92735e-21	2.41	4.063	4.718	2.776	7.673	1
50933	NM_016723	Uchl3	0.385613	0.00207182	0.0293485	0.0230128	0.854704	0.981065	0.0710731	0.571805	0.999991	-0.436876	0.000552906	0.00203553	31.21	37.38	31.737	31.897	22.657	1
56207	NM_001159866	Uchl5	0.415104	0.00267207	0.0356341	-0.0470001	0.734294	0.967294	0.137043	0.322096	0.999991	-0.580694	2.90706e-05	0.000142804	33.619	41.134	32.63	36.124	22.088	1
192169	NM_138668	Ufsp2	0.873968	9.92088e-10	7.62598e-08	0.107861	0.454325	0.91587	0.0345886	0.810751	0.999991	1.20555	2.98067e-17	6.06032e-16	10.756	18.176	11.636	10.756	24.826	1
22234	NM_011673	Ugcg	0.685983	0.00228165	0.0316691	0.155227	0.490118	0.922134	0.120263	0.592908	0.999991	0.675776	0.00265205	0.00815126	28.176	42.108	31.656	29.915	45.101	1
52020	NM_177465	Umodl1	2.36264	1.35508e-09	1.01083e-07	-0.0633188	0.882622	0.984451	-0.584203	0.191872	0.999991	4.80041	2.18692e-36	1.34887e-34	0.035	0.24	0.033	0.017	1.595	1
54445	NM_019449	Unc93b1	1.31167	6.24838e-09	4.14997e-07	-0.065647	0.771515	0.975176	0.301173	0.182602	0.999991	2.06339	6.09437e-20	1.48147e-18	28.322	66.509	26.978	33.829	123.185	1
67267	NM_026063	Uqcc2	0.624665	0.000821293	0.0142505	0.237561	0.203935	0.781603	0.12095	0.518121	0.999991	0.312047	0.095098	0.177343	58.894	83.956	69.617	62.359	72.57	1
22276	NM_009479	Uros	0.335092	0.00360752	0.0450359	0.101224	0.383947	0.900177	0.321226	0.00542431	0.750055	0.249669	0.0308624	0.0687079	4.554	5.27	4.893	5.515	5.362	0
22217	NM_011669	Usp12	0.426827	0.0038549	0.0474591	-0.131157	0.375911	0.898477	0.0472138	0.749767	0.999991	1.26269	1.02402e-17	2.13456e-16	9.803	12.091	8.983	9.833	23.505	1
24110	NM_011909	Usp18	1.55779	1.66408e-07	8.34408e-06	-0.845853	0.00527884	0.105293	0.0975533	0.745163	0.999991	3.05483	7.66049e-25	2.61088e-23	2.852	8.309	1.5	2.985	26.941	1
22288	NM_011682	Utrn	-0.747895	0.001269	0.020143	-0.51249	0.0271914	0.316795	-0.119385	0.606826	0.999991	-0.872933	0.000168992	0.000699409	19.972	10.655	13.915	17.635	10.49	1
22320	NM_016794	Vamp8	0.937823	2.01439e-09	1.42542e-07	0.0327416	0.834842	0.979392	-0.0662007	0.673687	0.999991	1.40877	1.89258e-19	4.4438e-18	42.335	74.96	43.194	39.102	112.755	1
238328	NM_177354	Vash1	0.815623	0.00188753	0.0271443	-0.617471	0.0190558	0.258014	-0.176764	0.501609	0.999991	0.186147	0.478719	0.620267	4.266	7.065	2.737	3.636	4.825	1
22323	NM_009499	Vasp	0.65044	0.000525743	0.00987757	-0.604004	0.00130437	0.0370478	-0.0936856	0.617777	0.999991	2.23171	1.11685e-32	5.5944e-31	56.333	80.829	36.956	51.27	270.174	1
22325	NM_009500	Vav2	0.514977	0.00376098	0.0464918	0.105848	0.552326	0.93664	0.0587928	0.74152	0.999991	1.69657	9.6478e-22	2.65797e-20	7.003	9.226	7.619	7.071	22.997	1
22334	NM_011695	Vdac2	0.460297	0.00017834	0.00394249	0.0193924	0.87464	0.983181	-0.0186671	0.879322	0.999991	0.07835	0.523824	0.661331	95.031	119.823	96.496	91.372	99.167	1
22335	NM_011696	Vdac3	0.467205	0.000677719	0.0122321	0.0737441	0.592098	0.941256	0.0604785	0.660453	0.999991	0.0724577	0.598607	0.726183	55.87	70.858	58.912	56.872	58.056	1
22349	NM_009509	Vil1	3.0104	1.50355e-12	1.67414e-10	0.808297	0.0663305	0.51514	0.337447	0.45121	0.999991	3.41417	8.84601e-16	1.59286e-14	0.067	0.807	0.145	0.092	1.191	1
56552	NM_019917	Vmn2r26	2.175	6.31114e-05	0.0016281	0.436331	0.441468	0.911122	-0.193449	0.738706	0.999991	1.88977	0.000545216	0.00201125	0.009	0.144	0.024	0.003	0.119	1
228545	NM_172269	Vps18	1.32224	6.52606e-15	9.50233e-13	0.123051	0.470866	0.919293	-0.0111842	0.947827	0.999991	1.81923	6.89383e-27	2.60767e-25	5.513	12.833	6.035	5.324	19.705	1
68299	NM_026664	Vps53	0.440447	0.000713057	0.0127785	-0.113331	0.385528	0.900177	0.0349412	0.788936	0.999991	0.432888	0.000881652	0.0030796	15.346	19.1	14.228	15.307	20.537	1
22367	NM_011705	Vrk1	0.556408	0.000587165	0.0108168	-0.0947123	0.559044	0.93664	0.0421432	0.794849	0.999991	1.36094	3.86298e-17	7.74e-16	19.372	26.182	18.167	19.411	49.994	1
231668	NM_001033311	Vsig10	1.42644	0.000640185	0.0116239	0.48056	0.263445	0.837354	0.0835996	0.84875	0.999991	3.00583	1.88235e-13	2.74385e-12	0.057	0.182	0.09	0.059	0.676	0
74048	NM_028732	Vsir	-0.545558	0.00257427	0.0346552	0.0853113	0.636331	0.948019	-0.0585366	0.74583	0.999991	1.45556	5.72174e-16	1.0474e-14	7.656	4.746	8.167	7.115	21.182	1
233813	NM_177697	Vwa3a	2.80522	1.00301e-06	4.1984e-05	0.104714	0.860996	0.9816	0.161691	0.786908	0.999991	0.520057	0.38081	0.528751	0.002	0.118	0.003	0.003	0.01	1
22371	NM_011708	Vwf	1.32146	0.00234615	0.0324158	0.431166	0.33799	0.881432	0.60279	0.17827	0.999991	3.17247	3.82803e-14	5.98084e-13	0.016	0.051	0.025	0.028	0.234	1
79565	NM_024479	Wbscr27	-1.09108	8.53054e-06	0.000285792	1.36678	1.18305e-08	1.86395e-06	0.502142	0.0370516	0.999991	-1.17957	1.57178e-06	1.01411e-05	3.163	1.305	8.48	4.375	1.324	1
545030	NM_001146022	Wdfy4	1.41337	1.19578e-11	1.20718e-09	-0.42931	0.0397571	0.393446	0.069795	0.738009	0.999991	3.24653	9.56692e-55	1.37514e-52	9.691	24.308	7.174	9.914	97.296	1
22388	NM_011715	Wdr1	0.483274	0.000337507	0.00675752	-0.249513	0.064423	0.507522	-0.13504	0.31688	0.999991	0.980037	3.54503e-13	4.99568e-12	83.485	107.082	70.298	73.501	163.915	1
216156	NM_175450	Wdr18	0.443605	0.000238245	0.00503876	-0.0633477	0.600871	0.943365	0.090055	0.456804	0.999991	-0.460154	0.000152476	0.000637761	18.045	22.502	17.29	18.654	12.93	1
218460	NM_172590	Wdr41	0.563061	5.20259e-06	0.000182791	0.189386	0.127979	0.675769	-0.0521952	0.677033	0.999991	1.11923	7.34139e-20	1.769e-18	4.713	6.391	5.401	4.413	10.184	1
54636	NM_172372	Wdr45	-0.515351	0.000144952	0.00327614	0.231874	0.0841178	0.571957	0.213167	0.112662	0.999991	-0.459086	0.000708021	0.00253489	14.62	9.291	17.277	16.557	10.474	0
67936	NM_026464	Wdr55	0.326898	0.00463382	0.0547347	0.167224	0.148448	0.715986	0.151331	0.191594	0.999991	-0.473249	5.40663e-05	0.000251127	15.326	17.616	17.245	16.501	10.864	1
70465	NM_027432	Wdr77	0.36637	0.00378326	0.0466911	-0.158414	0.211293	0.786664	0.0803119	0.526018	0.999991	-0.562976	9.24375e-06	5.08483e-05	27.873	32.925	25.026	28.593	18.546	0
242584	NM_146254	Wdr78	-1.20198	3.11028e-18	7.246e-16	-0.591063	1.52011e-05	0.000996244	0.0509725	0.707317	0.999991	-2.73402	1.36345e-78	3.954e-76	8.22	3.229	5.448	8.224	1.178	1
381693	NM_029440	Wdr95	1.63446	0.00183782	0.0266828	0.457895	0.399858	0.905071	-0.169919	0.761273	0.999991	2.68154	1.92692e-07	1.45244e-06	0.016	0.11	0.034	0.009	0.288	0
22411	NM_001285792	Wnt11	1.64132	0.00245392	0.0334735	-0.012538	0.982441	0.995097	0.320259	0.570379	0.999991	3.03988	9.8903e-09	8.84668e-08	0.008	0.076	0.008	0.015	0.278	1
22419	NM_009525	Wnt5b	-1.05062	0.00372175	0.0461198	-0.232157	0.51656	0.929196	0.0677712	0.849467	0.999991	-2.27018	1.40167e-09	1.39576e-08	1.343	0.523	1.135	1.369	0.22	1
22423	NM_011720	Wnt8b	1.47837	0.00136347	0.021145	-0.117415	0.806375	0.979392	0.391608	0.407333	0.999991	-0.26751	0.578938	0.709876	0.078	0.259	0.07	0.109	0.059	1
216795	NM_139298	Wnt9a	2.49879	1.55768e-08	9.66407e-07	-0.173104	0.703902	0.959638	0.0937817	0.836181	0.999991	3.22904	2.38732e-13	3.44049e-12	0.144	1.072	0.122	0.15	2.07	0
59043	NM_021539	Wsb2	1.10593	1.25503e-13	1.63836e-11	0.293006	0.0506038	0.445188	0.248926	0.0970503	0.999991	1.21932	2.99786e-16	5.62482e-15	11.021	21.947	13.592	12.801	25.71	1
22433	NM_013842	Xbp1	-0.42041	0.0088285	0.0878961	0.164662	0.304778	0.865721	0.0246649	0.877852	0.999991	-0.98328	9.40825e-10	9.58215e-09	97.284	66.094	109.596	95.965	48.042	1
381560	NM_201368	Xkr8	0.659402	0.00025124	0.00526213	-0.483826	0.00886497	0.153299	-0.130474	0.476683	0.999991	0.204831	0.259582	0.396717	1.494	2.184	1.063	1.321	1.709	1
331524	NM_183319	Xkrx	-0.701275	0.0011882	0.0191823	0.275286	0.184843	0.765983	-0.769458	0.000417544	0.157813	-1.30155	7.75123e-09	7.07107e-08	1.047	0.575	1.282	0.579	0.398	0
68876	NM_001159559	Xrcc6bp1	0.56576	0.00242003	0.0332244	0.396166	0.0342914	0.362383	0.282902	0.132279	0.999991	-0.0996136	0.599425	0.727016	4.72	6.464	6.245	5.621	4.351	1
70120	NM_198246	Yars2	0.392419	0.00708941	0.0748118	0.0944164	0.518578	0.929885	0.127064	0.385232	0.999991	-0.230274	0.117289	0.21145	10.846	13.068	11.628	11.57	9.115	1
22608	NM_011732	Ybx1	0.615648	3.191e-10	2.61196e-08	0.00101537	0.991727	0.996478	0.205226	0.0360925	0.999991	-0.213947	0.0289421	0.0649654	321.397	451.543	322.536	361.053	273.471	1
53422	NM_016875	Ybx2	0.7703	1.20657e-05	0.000387101	-0.172044	0.333646	0.880103	0.171562	0.333122	0.999991	-2.36619	6.28522e-35	3.54589e-33	7.355	11.62	6.529	8.051	1.329	1
66090	NM_026875	Ypel3	-0.645742	0.00625783	0.068569	0.555346	0.0183161	0.251602	0.106475	0.651411	0.999991	0.504857	0.0320025	0.0708643	31.988	18.512	47.914	33.449	45.582	0
22628	NM_018871	Ywhag	0.798069	1.58254e-05	0.000487081	-0.258299	0.162621	0.741686	0.00132927	0.994266	0.999991	0.668966	0.000296544	0.00116656	58.442	94.062	48.998	56.783	92.859	1
22635	NM_011741	Zan	-1.53511	9.0279e-07	3.8187e-05	0.0470324	0.879036	0.984064	0.0212884	0.945102	0.999991	-4.25506	5.17146e-36	3.09726e-34	0.668	0.194	0.697	0.655	0.023	1
72114	NM_028106	Zbed3	0.471916	0.00538694	0.0613658	0.132458	0.435337	0.910095	0.20731	0.222111	0.999991	0.054363	0.748958	0.840594	16.039	20.449	17.681	18.031	16.472	0
72147	NM_028125	Zbtb46	1.5885	0.000498391	0.00944572	0.0403337	0.934327	0.991485	-0.261207	0.602013	0.999991	5.64713	1.60364e-38	1.07757e-36	0.061	0.183	0.038	0.031	4.563	1
230119	NM_001163284	Zbtb5	0.61922	0.00157037	0.0238756	-0.395478	0.0443142	0.415042	0.0125324	0.949103	0.999991	0.130502	0.505953	0.645076	6.492	8.887	4.917	6.371	6.805	1
22724	NM_009565	Zbtb7b	1.29778	4.72514e-05	0.00125752	1.59403	5.67583e-07	5.90211e-05	-0.00387581	0.990375	0.999991	4.19296	8.9027e-40	6.54051e-38	1.239	3.021	4.132	1.177	28.149	0
237256	NM_172785	Zc3h12d	1.40274	8.22188e-07	3.4973e-05	-0.449133	0.128572	0.677305	-0.443739	0.134114	0.999991	3.65407	1.20576e-38	8.23604e-37	0.441	1.146	0.311	0.302	6.402	1
78751	NM_178404	Zc3h6	-0.672824	0.000250224	0.00524813	-0.103065	0.571317	0.937661	0.0388656	0.830801	0.999991	-0.613809	0.000829171	0.00291497	2.495	1.412	2.331	2.496	1.589	1
224454	NM_146073	Zdhhc14	-0.665916	0.00313849	0.040191	-0.327283	0.144372	0.708596	0.107631	0.629602	0.999991	0.0961878	0.66634	0.781253	2.633	1.49	2.089	2.75	2.792	1
227693	NM_001290503	Zer1	-0.343716	0.00227449	0.031602	-0.00807631	0.94271	0.993769	0.133786	0.233692	0.999991	-0.604136	8.70664e-08	6.90598e-07	17.502	12.578	17.461	18.649	11.328	1
11906	NM_007496	Zfhx3	0.955177	0.00231348	0.0320522	0.208397	0.509229	0.927698	-0.157294	0.62048	0.999991	2.4052	1.13432e-14	1.86571e-13	0.17	0.319	0.2	0.144	1.012	1
238803	NM_001004149	Zfp366	4.11763	1.02357e-23	3.78048e-21	-0.0165887	0.972784	0.995097	-0.146332	0.767061	0.999991	7.61415	3.47735e-79	1.0451e-76	0.014	0.706	0.014	0.008	9.789	1
29813	NM_013866	Zfp385a	1.2413	7.47653e-08	4.04347e-06	-0.521946	0.0240638	0.297187	-0.334685	0.147876	0.999991	1.47557	1.60042e-10	1.76483e-09	21.704	48.504	14.956	16.72	62.139	1
101023	NM_175311	Zfp513	0.547227	0.00056795	0.0105527	0.230732	0.147595	0.713732	0.192768	0.227001	0.999991	1.31088	1.00878e-16	1.96872e-15	6.236	8.396	7.358	6.879	15.544	1
22710	NM_144515	Zfp52	1.04242	5.55121e-08	3.10192e-06	0.269903	0.165204	0.744708	-0.178633	0.364914	0.999991	2.10245	1.80965e-28	7.51597e-27	1.515	2.918	1.847	1.289	6.692	1
70227	NM_001004139	Zfp619	0.808428	0.00163985	0.0246352	-0.188243	0.476177	0.920236	-0.0799449	0.761882	0.999991	2.2032	2.25372e-18	4.89539e-17	0.308	0.51	0.269	0.28	1.512	1
68036	NM_026521	Zfp706	0.413205	0.00431205	0.0516593	-0.0408906	0.777751	0.976397	0.0872693	0.546876	0.999991	0.328994	0.0230697	0.0532973	29.143	35.587	28.389	30.189	36.266	1
209225	NM_175433	Zfp710	0.864928	8.68036e-09	5.56978e-07	-0.617005	4.76191e-05	0.00257011	0.125361	0.406099	0.999991	2.65362	2.87157e-70	7.08464e-68	7.513	12.58	4.886	7.951	48.479	1
238692	NM_177712	Zfp874a	-0.607587	0.000653767	0.0118421	0.0576181	0.742855	0.969889	0.0621411	0.723795	0.999991	-0.471905	0.00793441	0.021226	2.689	1.593	2.811	2.734	1.896	1
408067	NM_001076791	Zfp874b	-0.672957	3.06272e-05	0.000864825	0.189385	0.22997	0.805548	0.0757422	0.632497	0.999991	-0.311391	0.051273	0.105468	2.391	1.355	2.739	2.447	1.895	0
240041	NM_177358	Zfp945	-0.528883	0.000460702	0.00887583	0.0706489	0.634584	0.947963	-0.188159	0.209169	0.999991	0.360817	0.014684	0.0360985	1.559	0.98	1.642	1.312	1.983	0
71640	NM_001142943	Zfp949	-0.353733	0.00279775	0.0369044	0.217682	0.0588364	0.48378	0.200527	0.0828549	0.999991	0.287391	0.0124649	0.0313232	2.481	1.769	2.895	2.76	2.997	0
72008	NM_028054	Zfyve19	0.343394	0.000718897	0.0128527	0.140584	0.16827	0.747057	0.0501596	0.624557	0.999991	0.845635	4.18112e-17	8.34708e-16	9.254	10.752	10.224	9.306	16.496	1
231125	NM_001015039	Zfyve28	-0.728177	0.000477217	0.00913589	1.4001	6.18517e-12	2.29706e-09	0.221115	0.282243	0.999991	0.521975	0.0108514	0.0278143	2.251	1.221	6.152	2.555	3.233	1
69747	NM_027198	Zswim7	1.09483	6.25677e-08	3.47056e-06	0.091878	0.660185	0.95142	0.111498	0.594474	0.999991	1.64987	1.72495e-16	3.30016e-15	3.163	6.358	3.377	3.301	10.182	1

## Sheet: PU1WTHA44
DEGs in PU1WTHA44 cells (vs EVGFP)
GeneID	TranscriptID.x	Genes	log2FC_PU1WTHA25_vs_EVGFP	pvalue_PU1WTHA25_vs_EVGFP	padj_PU1WTHA25_vs_EVGFP	log2FC_PU1ENGHA_vs_EVGFP	pvalue_PU1ENGHA_vs_EVGFP	padj_PU1ENGHA_vs_EVGFP	log2FC_PU1ETSHA_vs_EVGFP	pvalue_PU1ETSHA_vs_EVGFP	padj_PU1ETSHA_vs_EVGFP	log2FC_PU1WTHA44_vs_EVGFP	pvalue_PU1WTHA44_vs_EVGFP	padj_PU1WTHA44_vs_EVGFP	EVGFP_rpkm (mean of four)	PU1WTHA25_rpkm (mean of four)	PU1ENGHA_rpkm (mean of four)	PU1ETSHA_rpkm (mean of four)	PU1WTHA44_rpkm (mean of four)	Genes_PU1WTHAaHA_CD25_peaks (1 gene with PU1 peak, 0 gene with no peak)
212679	NM_175439	March2	0.00933759	0.965699	0.990896	0.0997691	0.645662	0.950527	0.234519	0.27956	0.999991	-0.803721	0.000244351	0.000978706	4.366	4.016	4.723	5.008	2.423	0
54204	NM_017461	Sept1	-0.111451	0.29503	0.66961	0.135345	0.203333	0.78128	0.00692512	0.948118	0.999991	-0.82044	1.39727e-14	2.28004e-13	217.529	184.045	239.036	212.082	121.097	1
24050	NM_011889	Sept3	1.11674	0.0228453	0.169998	0.242592	0.622231	0.947856	0.199748	0.685168	0.999991	2.03469	3.25177e-05	0.000158	0.245	0.606	0.308	0.287	1.433	1
18951	NM_213614	Sept5	0.654954	0.196786	0.572962	0.479085	0.345215	0.887153	0.0438732	0.931183	0.999991	1.78549	0.000427182	0.00161616	1.319	2.193	2.061	1.316	6.401	1
56526	NM_001253706	Sept6	-0.0358444	0.812001	0.946294	-0.311939	0.0385063	0.385508	-0.00109878	0.994183	0.999991	-0.696089	3.91191e-06	2.33697e-05	74.331	65.24	59.552	72.334	44.343	1
20362	NM_033144	Sept8	0.238378	0.533613	0.82877	1.33489	0.000485416	0.0172656	0.357496	0.350508	0.999991	1.59549	3.0438e-05	0.000148726	3.996	4.358	11.372	5.065	13.681	1
53860	NM_001113487	Sept9	-0.00356434	0.977998	0.993712	0.245113	0.0578443	0.480434	0.107155	0.407027	0.999991	-0.482747	0.000188758	0.000772892	138.547	128.158	161.991	143.575	100.772	1
103080	NM_001024911	Sept10	0.478815	0.293142	0.668229	0.385515	0.397659	0.905014	0.10765	0.813852	0.999991	1.8947	2.81797e-05	0.000139048	0.413	0.629	0.58	0.462	2.257	1
66838	NR_038126	0610009L18Rik	0.482432	0.124227	0.470528	-0.362184	0.261063	0.83521	-0.568078	0.081509	0.999991	1.0259	0.000953378	0.00329624	1.935	2.552	1.454	1.204	4.135	1
71675	NM_027860	0610010F05Rik	0.101067	0.669279	0.894281	-0.150308	0.525534	0.931079	0.0340122	0.88574	0.999991	-0.714376	0.00260227	0.0080223	8.172	8.028	7.383	8.14	4.82	1
68364	NM_026696	0610030E20Rik	0.0663553	0.643515	0.879906	0.220366	0.123931	0.670122	0.17554	0.220728	0.999991	0.38379	0.00732632	0.0197947	7.436	7.123	8.722	8.163	9.619	1
70345	NR_028125	0610038B21Rik	-0.00461706	0.986883	0.994951	-0.198348	0.482401	0.920827	0.0675041	0.810046	0.999991	-0.927618	0.00140426	0.00465272	1.371	1.249	1.194	1.394	0.671	1
75394	NR_104577	0610040F04Rik	0.435386	0.180228	0.552134	-0.627029	0.058248	0.482247	-0.586566	0.0766808	0.999991	2.08628	7.99371e-11	9.03186e-10	1.26	1.604	0.786	0.775	5.961	1
76261	NM_029554	0610040J01Rik	0.324034	0.578381	0.850662	-0.110459	0.851233	0.980271	-0.54925	0.356447	0.999991	1.5742	0.00570356	0.0158988	0.021	0.033	0.016	0	0.147	1
66117	NM_025363	1110001J03Rik	0.113234	0.599214	0.857182	0.36517	0.0894107	0.586983	0.112322	0.602419	0.999991	-0.629788	0.00378985	0.0111411	22.947	22.775	29.744	24.002	14.395	1
68001	NM_026502	1110004E09Rik	0.0995079	0.468682	0.795525	0.100876	0.462588	0.918082	0.118687	0.387742	0.999991	-1.2073	1.04548e-17	2.17655e-16	18.527	18.163	19.899	19.645	7.82	1
56372	NM_019772	1110004F10Rik	0.0840619	0.357281	0.720549	-0.0689244	0.450875	0.915127	0.073154	0.423343	0.999991	-0.256477	0.0050989	0.0144299	63.948	61.963	61.089	65.324	52.764	1
68480	NM_026738	1110007C09Rik	0.725591	0.000807708	0.0140749	-0.23377	0.285653	0.854607	0.117479	0.590124	0.999991	1.41242	5.77975e-11	6.65779e-10	9.521	14.655	8.069	10.087	25.986	1
73737	NM_198001	1110008P14Rik	0.724029	0.00138983	0.0213666	0.479806	0.0346871	0.364098	0.104355	0.648291	0.999991	1.31764	4.93714e-09	4.61862e-08	7.324	11.28	10.349	7.638	18.672	0
68763	NR_027943	1110038B12Rik	0.197428	0.337152	0.705082	0.0968302	0.637917	0.94832	0.0941004	0.647496	0.999991	-0.557688	0.00685732	0.0186925	64.001	67.387	68.464	66.633	42.536	0
68861	NM_001033145	1190002N15Rik	-0.267125	0.297393	0.671753	-0.62854	0.0142368	0.212299	-0.0981361	0.701833	0.999991	-1.50935	4.10262e-09	3.87522e-08	32.371	24.327	20.694	29.355	10.66	1
68918	NM_197988	1190005I06Rik	1.03882	0.0254093	0.182443	0.400348	0.391913	0.901495	0.164114	0.726651	0.999991	1.31444	0.00460876	0.0132033	0.857	1.934	1.222	0.968	2.647	1
544717	NM_001135567	1190007I07Rik	0.176189	0.33772	0.705416	0.30912	0.0919824	0.591513	0.111254	0.545773	0.999991	-0.944391	5.3133e-07	3.69184e-06	12.267	12.509	15.312	12.728	6.353	1
100043489	NR_037957	1300002E11Rik	-0.434077	0.00723368	0.0759703	0.178381	0.265537	0.838754	0.129444	0.419795	0.999991	-1.83736	9.38096e-28	3.79137e-26	9.835	7.683	12.76	10.87	2.877	1
69784	NM_001145198	1500009L16Rik	-0.174869	0.558454	0.843112	0.322847	0.279812	0.849326	-0.107463	0.719157	0.999991	-3.49947	6.49503e-31	2.95765e-29	46.893	37.684	59.555	42.281	3.397	1
668215	NR_033510	1500017E21Rik	-0.447647	0.0370373	0.23457	0.0265645	0.900513	0.987084	0.193374	0.361997	0.999991	-0.545435	0.0113182	0.028863	2.145	1.42	2.189	2.376	1.427	0
69781	NR_037959	1600010M07Rik	1.52944	0.00672406	0.0721029	0.112391	0.847976	0.980097	0.0262697	0.964417	0.999991	4.60456	3.15089e-17	6.37505e-16	0	0.238	0.012	0	3.715	1
67912	NM_001083881	1600012H06Rik	0.0424284	0.757975	0.928266	0.122128	0.374507	0.897557	0.0662596	0.630634	0.999991	0.581706	2.09737e-05	0.000106479	6.524	6.124	7.164	6.616	9.695	1
75462	NM_029296	1700001C19Rik	-0.956008	0.00920259	0.0904902	0.211569	0.539919	0.933437	0.108165	0.755655	0.999991	-0.908353	0.0132047	0.0328924	0.434	0.18	0.513	0.465	0.203	1
67503	NR_033199	1700001G17Rik	-0.570331	0.153471	0.515214	-0.206953	0.598755	0.942887	-0.205385	0.602528	0.999991	-1.55696	0.000245939	0.000983873	0.685	0.391	0.582	0.561	0.163	0
69291	NR_027980	1700001L05Rik	0.391319	0.329743	0.698461	0.283663	0.481973	0.920652	0.598092	0.134115	0.999991	1.11812	0.00429674	0.0124431	0.051	0.066	0.066	0.083	0.128	1
73598	NM_198000	1700001O22Rik	-0.47538	0.147987	0.508849	-0.744427	0.0255718	0.306587	-0.167103	0.607059	0.999991	-0.899709	0.0076098	0.0204503	0.689	0.436	0.388	0.589	0.335	1
74230	NM_198637	1700016K19Rik	1.74399	0.000769562	0.0134878	-0.493075	0.377691	0.89915	-0.435574	0.436004	0.999991	2.71683	1.03514e-07	8.10174e-07	0.059	0.378	0.017	0.017	0.922	1
74211	NM_028820	1700017B05Rik	-0.0698837	0.75577	0.927719	0.457528	0.0416419	0.403788	-0.137849	0.539564	0.999991	-1.24523	3.12639e-08	2.6475e-07	25.738	22.349	35.949	22.719	10.411	1
67080	NM_144953	1700019D03Rik	-0.794076	0.1535	0.515214	-0.795641	0.152725	0.723874	-0.267415	0.623802	0.999991	1.53855	0.00270181	0.00827667	0.111	0.025	0.027	0.074	0.495	1
67851	NM_026411	1700021F05Rik	0.0350978	0.872626	0.965102	0.219623	0.314866	0.872185	0.182821	0.403293	0.999991	-0.676703	0.00221404	0.00694945	10.223	9.579	11.922	11.329	6.199	1
242594	NR_104376	1700024P16Rik	-0.00911036	0.988034	0.995396	0.16285	0.788353	0.977541	0.352988	0.560261	0.999991	1.41066	0.0188824	0.0449103	0.007	0.007	0.012	0.017	0.072	1
69987	NM_027283	1700026L06Rik	1.31943	0.00076892	0.0134878	0.115782	0.773778	0.975796	0.103243	0.79823	0.999991	3.77488	1.12428e-22	3.28346e-21	0.742	2.016	0.824	0.785	14.337	1
76421	NM_175241	1700028K03Rik	0.0683869	0.820729	0.949523	0.59115	0.0486068	0.436771	0.0924932	0.759409	0.999991	-0.632635	0.0387293	0.0833697	0.918	0.885	1.421	0.951	0.565	1
98736	NR_030669	1700034H15Rik	0.493632	0.141848	0.499812	0.224354	0.507491	0.92739	-0.0870071	0.799643	0.999991	0.974334	0.00340898	0.0101551	0.212	0.285	0.256	0.193	0.444	1
73261	NM_028484	1700037C18Rik	0.192274	0.418759	0.761995	0.172703	0.468172	0.918586	0.0176372	0.941728	0.999991	0.725283	0.00177299	0.00570297	1.15	1.213	1.309	1.123	1.932	1
67326	NM_026091	1700037H04Rik	0.0774971	0.635183	0.87627	0.221608	0.174399	0.753355	0.193364	0.236335	0.999991	-0.690624	2.76304e-05	0.000136623	18.033	17.409	21.103	20.176	10.945	0
73287	NM_028491	1700040L02Rik	-0.370703	0.448742	0.782959	-0.105888	0.827988	0.979392	-0.133204	0.784908	0.999991	-1.69905	0.000788456	0.00279203	0.552	0.361	0.501	0.474	0.093	1
69430	NR_033553	1700048O20Rik	-0.422191	0.0279475	0.193982	0.146706	0.441455	0.911122	0.419729	0.0273207	0.999991	-2.23093	5.10431e-28	2.08332e-26	5.951	4.03	6.587	7.732	1.182	1
73430	NM_028538	1700049G17Rik	0.0293675	0.89378	0.970981	-0.0745783	0.735008	0.967512	0.102119	0.642435	0.999991	0.466525	0.0328631	0.0724413	1.126	1.051	1.076	1.166	1.554	1
78625	NM_030141	1700061G19Rik	0.286339	0.496647	0.809812	-0.171781	0.687287	0.955565	-0.329725	0.443279	0.999991	1.08844	0.0086863	0.0229368	0.208	0.245	0.181	0.151	0.506	1
73449	NM_001033168	1700066B19Rik	0.109611	0.604284	0.85997	-0.470453	0.0284973	0.32588	-0.392576	0.0675218	0.999991	-2.11135	2.33294e-19	5.44681e-18	1.833	1.814	1.314	1.352	0.384	1
73516	NR_027904	1700086O06Rik	-0.0433508	0.802647	0.94369	-0.0137451	0.936755	0.992079	-0.0827619	0.635088	0.999991	-0.353061	0.045496	0.095462	3.091	2.742	3.07	2.82	2.374	1
27660	NM_138581	1700088E04Rik	0.612127	0.000359824	0.00712264	0.466495	0.00678412	0.124639	0.202227	0.246009	0.999991	0.956466	1.90191e-08	1.65466e-07	3.133	4.432	4.387	3.504	6.116	0
67522	NR_045287	1700097N02Rik	-0.232253	0.628795	0.873965	0.101859	0.831741	0.979392	0.0425458	0.929339	0.999991	-1.42682	0.00337675	0.0100754	1.923	1.443	2.106	1.959	0.516	0
77036	NM_029843	1700109H08Rik	-0.177923	0.549609	0.837465	-0.0393357	0.894165	0.986149	0.00311358	0.991607	0.999991	-0.726936	0.0175558	0.0421792	1.743	1.393	1.688	1.68	0.98	0
73549	NR_038059	1700110I01Rik	0.384405	0.509631	0.816477	-0.337113	0.566389	0.93734	0.0580355	0.921046	0.999991	1.55657	0.00705832	0.0191603	0.064	0.098	0.036	0.063	0.359	1
73558	NR_040728	1700110K17Rik	-0.26726	0.473249	0.796451	-0.336259	0.368521	0.894381	-0.512947	0.175812	0.999991	0.906974	0.0111629	0.0285373	0.83	0.61	0.636	0.522	1.664	1
76633	NM_028275	1700112E06Rik	0.53432	0.166457	0.534422	-0.00648121	0.986712	0.995097	-0.487002	0.215861	0.999991	1.53864	5.84327e-05	0.000268976	1.366	1.915	1.357	0.866	4.517	1
76642	NR_045997	1700113A16Rik	-0.0863399	0.699813	0.905955	0.425332	0.0564271	0.47473	0.0963368	0.666705	0.999991	-0.517663	0.0214877	0.0501865	10.138	8.712	13.69	10.585	6.909	1
100503636	NR_040577	1700123M08Rik	-0.0906592	0.802244	0.94369	0.113186	0.752942	0.971358	0.354841	0.321318	0.999991	-0.816786	0.0289139	0.0649121	0.769	0.654	0.838	0.968	0.388	1
73626	NM_023707	1810009J06Rik	-1.04156	0.063002	0.329775	-0.281644	0.607224	0.945413	0.452809	0.401406	0.999991	-1.65321	0.00384033	0.0112674	0.218	0.049	0.161	0.316	0	0
69069	NM_001163616	1810011H11Rik	0.506146	0.340369	0.707218	-0.11116	0.838697	0.979392	-0.632476	0.260185	0.999991	3.97204	7.54453e-16	1.37196e-14	0.032	0.062	0.026	0	1.351	1
69068	NM_026931	1810011O10Rik	0.56496	0.348418	0.715014	0.563082	0.350038	0.888794	0.15705	0.795675	0.999991	1.94213	0.00102264	0.00350565	0	0.026	0.029	0.006	0.172	1
66263	NR_015572	1810014B01Rik	0.11709	0.646489	0.881431	0.152387	0.55039	0.93664	0.272752	0.284827	0.999991	-0.555833	0.0314526	0.0698338	2.91	2.904	3.258	3.464	1.917	1
69120	NR_040417	1810021B22Rik	0.284287	0.481389	0.801238	0.0400699	0.921893	0.990275	-0.0734405	0.858773	0.999991	0.846353	0.0321894	0.0712207	0.474	0.555	0.491	0.424	0.949	1
69126	NM_001099674	1810022K09Rik	0.286125	0.127943	0.478028	0.132281	0.482047	0.920652	0.00637219	0.973026	0.999991	-0.399374	0.0346837	0.0759066	44.3	49.568	48.475	43.351	32.912	1
69773	NM_178619	1810026J23Rik	-0.0749956	0.630344	0.874492	-0.0738176	0.635725	0.947963	0.0357909	0.818318	0.999991	-0.529328	0.00070528	0.00252617	14.815	12.842	14.141	14.793	10.089	0
67704	NM_024461	1810037I17Rik	0.307176	0.0631648	0.330513	0.291222	0.0781683	0.555317	-0.0236582	0.886411	0.999991	0.42413	0.0102785	0.0265558	40.118	45.553	49.182	38.174	53.381	1
67884	NM_026431	1810043G02Rik	0.192825	0.340861	0.707734	0.381649	0.058591	0.48278	0.313307	0.121401	0.999991	0.898679	7.34057e-06	4.10903e-05	3.351	3.515	4.402	4.047	6.298	1
67705	NR_027875	1810058I24Rik	0.180133	0.294787	0.669559	0.0911544	0.596203	0.942578	0.050554	0.769031	0.999991	0.57142	0.000868665	0.00304088	23.723	24.288	25.035	23.968	35.271	1
75602	NR_033571	1810062O18Rik	-0.461391	0.0719936	0.355229	0.212744	0.39335	0.902216	0.30929	0.214232	0.999991	-1.77376	3.60645e-10	3.86355e-09	2.46	1.601	2.877	2.982	0.624	0
69206	NR_033207	2010016I18Rik	-0.438814	0.150511	0.51087	0.17659	0.559765	0.936641	0.185175	0.541116	0.999991	-1.35405	1.37596e-05	7.27361e-05	2.465	1.627	2.829	2.743	0.871	1
243753	NM_001025573	2010107G12Rik	-0.873972	0.0247466	0.17849	0.483444	0.211317	0.786664	0.284305	0.462676	0.999991	-3.11596	1.17646e-14	1.93117e-13	2.729	1.256	3.985	3.342	0.202	1
72061	NM_001289926	2010111I01Rik	-0.0281143	0.898917	0.973067	-0.367966	0.0968412	0.606252	-0.139884	0.527645	0.999991	-0.612807	0.00575302	0.0160178	9.009	8.931	7.8	7.717	7.301	1
68355	NR_027924	2010204K13Rik	-0.487396	0.180282	0.552188	0.603781	0.090191	0.587635	-0.415924	0.252875	0.999991	-0.994539	0.00714646	0.0193753	2.253	1.369	3.446	1.625	1.016	1
72097	NM_028096	2010300C02Rik	0.944516	0.0027829	0.0367406	0.439612	0.167488	0.746013	-0.0796053	0.805298	0.999991	-0.861847	0.00931108	0.0243609	0.336	0.628	0.468	0.308	0.17	1
72275	NM_028179	2200002D01Rik	0.726294	0.164347	0.532685	0.609764	0.243516	0.821039	0.258849	0.622119	0.999991	1.72648	0.000878744	0.00307096	0.661	1.246	1.214	0.826	3.344	1
69147	NM_026961	2200002J24Rik	0.555649	0.351212	NA	0.119985	0.841825	0.979392	-0.119306	0.843522	0.999991	1.68612	0.00385425	0.0113042	0.013	0.069	0.025	0	0.303	0
67373	NM_023333	2210010C04Rik	-0.876712	0.0923279	0.406313	-0.226744	0.655837	0.95142	0.140221	0.780977	0.999991	-1.74533	0.00128055	0.00428233	0.119	0.042	0.096	0.133	0.007	1
70393	NR_045499	2210416O15Rik	-0.359539	0.411167	0.756244	-0.12209	0.7789	0.976592	-0.62988	0.154079	0.999991	-0.927822	0.0374296	0.0810255	0.452	0.305	0.41	0.245	0.198	1
69478	NM_027090	2300009A05Rik	-0.00586385	0.977449	0.993712	0.336536	0.102459	0.618244	0.121189	0.558628	0.999991	-0.528933	0.0119395	0.0302189	8.804	8.01	11.21	9.338	5.949	1
76432	NR_040265	2310001H17Rik	0.189923	0.425082	0.766829	0.00925675	0.969181	0.995097	-0.207229	0.392431	0.999991	0.731458	0.00183262	0.00586736	3.195	3.296	3.423	2.581	5.172	1
100504720	NR_077063	2310002F09Rik	0.0989088	0.867028	0.963697	-0.132664	0.823285	0.979392	-0.095504	0.872366	0.999991	1.78208	0.00175568	0.00565499	0.009	0.011	0.006	0.006	0.102	1
66374	NM_025521	2310011J03Rik	0.301667	0.0343448	0.223596	0.117314	0.411103	0.905851	0.0823945	0.564021	0.999991	0.396603	0.00538642	0.0151347	21.858	24.709	23.769	22.471	28.549	1
69548	NR_033514	2310015A10Rik	-0.0223108	0.925344	0.97851	0.194144	0.412429	0.906193	0.0452168	0.849398	0.999991	1.3514	6.29446e-09	5.82573e-08	0.657	0.592	0.761	0.652	1.721	1
66367	NM_175107	2310022A10Rik	0.191834	0.165205	0.53364	0.00242618	0.986015	0.995097	0.146042	0.291137	0.999991	-0.331596	0.0169295	0.0408653	14.226	14.932	14.273	15.582	11.105	1
69551	NM_175149	2310022B05Rik	0.278737	0.447381	0.781755	0.109957	0.764444	0.972331	-0.212803	0.562238	0.999991	0.90888	0.0131711	0.0328185	4.769	5.4	5.223	3.95	9.547	1
66952	NM_025865	2310030G06Rik	0.170649	0.778732	0.936817	-0.119576	0.844235	0.979674	0.206509	0.733911	0.999991	1.32883	0.0273299	0.0618345	0.019	0.028	0.012	0.031	0.166	0
227446	NM_173187	2310035C23Rik	-0.0587794	0.702044	0.9066	0.0843234	0.58275	0.940247	0.160958	0.294324	0.999991	0.314067	0.0404795	0.0864168	5.62	4.923	5.995	6.055	6.901	1
73667	NM_001201332	2410004P03Rik	-0.510498	0.219643	0.600046	0.940395	0.0194868	0.260681	-0.0560668	0.891534	0.999991	-1.4519	0.000809676	0.00285677	0.404	0.24	0.862	0.376	0.106	1
71952	NM_023633	2410016O06Rik	0.0857106	0.624482	0.871272	0.0421077	0.809995	0.979392	0.110057	0.52974	0.999991	-0.600463	0.000639034	0.00231295	13.944	13.537	14.447	14.728	9.01	1
69732	NR_015504	2410018L13Rik	-0.239004	0.30744	0.681994	-0.181534	0.437946	0.910218	-0.0083987	0.971344	0.999991	-0.966677	4.41821e-05	0.000208427	6.631	5.112	5.83	6.356	3.252	1
76792	NM_001081236	2410131K14Rik	0.32867	0.0534946	0.297929	0.0148143	0.931095	0.990577	0.017963	0.916631	0.999991	0.737401	1.30326e-05	6.92029e-05	2.776	3.203	2.823	2.73	4.63	1
72190	NM_001001881	2510009E07Rik	-0.177711	0.57133	0.84679	-0.555063	0.0775001	0.552995	-0.259193	0.409279	0.999991	-0.634772	0.0436061	0.092175	2.531	2.024	1.681	2.042	1.562	1
66520	NR_024619	2610001J05Rik	0.22159	0.0945783	0.412262	0.171497	0.196121	0.776009	-0.116976	0.381298	0.999991	0.54418	3.7226e-05	0.000178258	8.369	8.935	9.451	7.496	12.109	0
67028	NM_025921	2610002M06Rik	-0.215182	0.314482	0.687339	0.0474787	0.824117	0.979392	-0.145539	0.496312	0.999991	-0.802434	0.000188385	0.000771941	3.55	2.78	3.692	3.127	1.974	1
69918	NR_038156	2610020C07Rik	0.018286	0.910916	0.975697	-0.0389813	0.811609	0.979392	-0.0138835	0.932386	0.999991	-0.714503	1.53361e-05	8.0071e-05	7.82	7.245	7.63	7.533	4.666	0
434234	NM_028129	2610020H08Rik	-0.701719	0.0139293	0.12306	-0.617042	0.0305501	0.339161	-0.26767	0.347765	0.999991	-1.10234	0.000114731	0.000495041	14.333	7.82	9.128	11.292	6.259	1
72386	NR_015556	2610035D17Rik	-0.812654	3.68522e-05	0.00101464	0.221071	0.251587	0.827968	0.193981	0.315121	0.999991	-0.585819	0.00278746	0.00850124	4.3	2.195	5.018	4.788	2.79	1
67157	NM_026005	2610301B20Rik	-0.0425321	0.828373	0.951534	0.0626218	0.7493	0.971358	0.0252027	0.897792	0.999991	-0.569381	0.00398303	0.0116345	5.318	4.71	5.573	5.254	3.505	1
112422	NM_145078	2610305D13Rik	0.348106	0.0954105	0.41392	-0.266234	0.212979	0.788941	-0.31101	0.147913	0.999991	-0.449583	0.0373735	0.0809571	1.065	1.252	0.881	0.825	0.757	0
72518	NR_045053	2610307P16Rik	-0.297187	0.346477	0.712576	-0.124939	0.692042	0.956791	-0.0405111	0.897804	0.999991	-2.15286	2.06566e-11	2.4815e-10	4.391	3.218	3.999	4.083	0.849	1
70458	NM_183287	2610318N02Rik	0.0314949	0.86044	0.962378	0.336654	0.0594473	0.48573	0.151045	0.398896	0.999991	-1.11309	1.08212e-09	1.09203e-08	11.295	10.575	14.374	12.249	5.057	0
72612	NM_028299	2700029M09Rik	0.26837	0.059135	0.317547	0.095779	0.500953	0.924943	1.21562e-05	0.999932	0.999991	-0.45662	0.00138631	0.00460063	42.317	46.693	45.213	41.299	30.314	1
67194	NR_045040	2700038G22Rik	0.269618	0.309078	0.682369	0.255587	0.33499	0.880483	0.246673	0.35243	0.999991	-0.695563	0.00943197	0.0246343	4.997	5.643	6.078	5.79	2.997	1
76967	NM_001163378	2700049A03Rik	-0.177233	0.32019	0.691279	-0.317268	0.0754091	0.545562	-0.00377458	0.9831	0.999991	-0.657745	0.000236746	0.000951243	5.518	4.416	4.387	5.361	3.394	0
72578	NR_045436	2700054A10Rik	-0.151138	0.581622	0.851624	0.612781	0.0247684	0.300418	0.214458	0.433294	0.999991	-2.59916	2.00692e-19	4.7056e-18	1.878	1.549	2.935	2.099	0.259	1
108899	NM_175381	2700081O15Rik	0.0145883	0.952332	0.987363	-0.0409279	0.866819	0.982382	0.06499	0.790007	0.999991	-0.797207	0.00110126	0.00374334	16.866	15.591	16.51	17.055	9.371	1
72657	NM_001033166	2700094K13Rik	0.0756277	0.674546	0.897285	0.0665883	0.711593	0.961495	0.117616	0.513753	0.999991	0.4286	0.0172456	0.0415251	91.602	88.44	95.556	96.384	122.476	0
72658	NM_028314	2700097O09Rik	0.397801	0.0228978	0.170138	0.3392	0.0529146	0.457939	0.351051	0.0456471	0.999991	-0.560636	0.00227977	0.00713198	3.039	3.686	3.881	3.785	2.003	1
66523	NM_025615	2810004N23Rik	0.119821	0.381011	0.733697	0.0524327	0.701603	0.959008	0.103512	0.449468	0.999991	-0.452683	0.000993569	0.00341963	26.213	26.071	27.272	27.477	18.854	1
69944	NM_172403	2810021J22Rik	0.229247	0.183045	0.556372	0.661972	0.000100105	0.00471731	0.217661	0.207387	0.999991	0.684135	5.81456e-05	0.000267729	0.94	1.012	1.512	1.057	1.508	0
69953	NR_027984	2810025M15Rik	0.287724	0.247319	0.628803	-0.343608	0.16908	0.748317	-0.38444	0.124305	0.999991	0.493075	0.0471967	0.0982941	8.607	9.684	6.708	6.324	12.162	1
70419	NM_027419	2810408A11Rik	0.0498331	0.828015	0.951265	-0.172773	0.452402	0.915636	0.0453506	0.843396	0.999991	-1.02412	1.11373e-05	5.99478e-05	5.27	4.996	4.662	5.28	2.482	1
69941	NR_038009	2810408I11Rik	-0.0875085	0.748597	0.923942	-0.18428	0.500696	0.92481	0.0188191	0.94501	0.999991	-0.821303	0.00324371	0.00972761	3.954	3.385	3.443	3.901	2.11	1
68026	NM_026515	2810417H13Rik	0.168066	0.32417	0.693332	-0.0310794	0.855347	0.981299	0.100654	0.554908	0.999991	-0.872465	3.15437e-07	2.29295e-06	126.173	129.782	123.853	132.142	67.215	0
72792	NM_001144992	2810459M11Rik	-0.140441	0.734735	0.918146	0.206114	0.616034	0.94781	0.46838	0.252584	0.999991	-1.09692	0.0105925	0.0272224	0.211	0.171	0.251	0.302	0.078	1
72937	NR_045434	2900008C10Rik	0.39266	0.228482	0.609574	0.349669	0.28405	0.853354	0.104914	0.750011	0.999991	1.1501	0.000345883	0.00133835	0.812	1.008	1.065	0.864	1.932	1
243219	NM_172884	2900026A02Rik	0.808534	0.00194709	0.0278422	0.430886	0.0990018	0.611877	0.534959	0.0405274	0.999991	2.8048	4.76956e-27	1.82502e-25	3.236	5.321	4.465	4.637	24.524	1
620760	NR_015468	2900079G21Rik	-0.904893	0.000860319	0.0146875	-0.0528331	0.844329	0.979674	0.358573	0.181586	0.999991	-4.27312	1.40767e-41	1.18115e-39	7.338	3.471	7.279	9.164	0.308	1
378954	NR_033215	3000002C10Rik	0.229735	0.147103	0.507998	0.250173	0.114023	0.645506	-0.00417361	0.979332	0.999991	-0.328629	0.0451251	0.09478	2.702	2.911	3.232	2.604	2.111	0
68067	NM_026543	3010026O09Rik	-0.0880957	0.552616	0.839681	0.105963	0.472168	0.919293	0.177383	0.228761	0.999991	-0.375113	0.0125065	0.0314087	6.122	5.262	6.593	6.747	4.633	1
73103	NM_028439	3110009E18Rik	0.206267	0.399305	0.747711	0.237931	0.33057	0.877431	0.0584239	0.812359	0.999991	-0.682869	0.00675186	0.0184416	5.603	5.969	6.667	5.683	3.355	1
73205	NM_001081343	3110043O21Rik	1.07736	1.94721e-07	9.63612e-06	0.899929	1.6228e-05	0.00104787	0.444489	0.0387541	0.999991	3.25237	1.39995e-61	2.46183e-59	0.365	0.734	0.709	0.488	3.718	1
73229	NM_001166497	3110052M02Rik	-0.155359	0.428672	0.769941	-0.130089	0.507162	0.92739	-0.0622435	0.751002	0.999991	0.487492	0.011539	0.0293233	0.975	0.797	0.889	0.898	1.361	1
269423	NM_026622	3110057O12Rik	-0.482893	0.0472254	0.27571	0.0115432	0.961925	0.995097	-0.00630683	0.979213	0.999991	-0.657338	0.00709683	0.0192565	2.895	1.862	2.943	2.809	1.774	1
218734	NM_146051	3830406C13Rik	-0.0768877	0.6508	0.883492	-0.075315	0.657478	0.95142	0.0952767	0.574221	0.999991	0.414862	0.013919	0.0344433	4.379	3.768	4.145	4.559	5.812	1
100043102	NR_033631	4632428C04Rik	-0.0028509	0.993689	0.997589	2.30469	1.66326e-11	5.5199e-09	1.07921	0.00200213	0.493511	-0.844535	0.0250771	0.0572469	0.257	0.235	1.514	0.572	0.122	1
654804	NR_073028	4732471J01Rik	1.44434	2.45261e-09	1.69588e-07	-0.140839	0.584842	0.940731	-0.130403	0.614237	0.999991	3.44319	2.97859e-48	3.3956e-46	1.195	3.158	1.072	1.041	14.305	0
74597	NR_015506	4833418N02Rik	1.41889	2.99151e-06	0.00011022	0.010715	0.97331	0.995097	0.374	0.235956	0.999991	1.66336	3.73076e-08	3.12093e-07	0.429	1.16	0.434	0.553	1.503	1
67392	NM_001113550	4833420G17Rik	-0.243629	0.100669	0.424043	0.145812	0.324984	0.87534	0.0795097	0.591686	0.999991	-0.333105	0.0248907	0.0569078	20.659	15.915	22.914	21.057	16.127	1
373852	NR_015501	4833422C13Rik	-0.772448	0.012112	0.111226	-0.160516	0.594877	0.94145	-0.0339656	0.910276	0.999991	-1.2634	6.0881e-05	0.000279199	0.676	0.344	0.603	0.637	0.253	0
74601	NR_045459	4833427F10Rik	1.08636	0.0579508	0.313818	-0.0123057	0.983407	0.995097	-0.11576	0.845592	0.999991	2.68136	1.33168e-06	8.70752e-06	0.005	0.061	0.005	0	0.305	1
235345	NM_177702	4833427G06Rik	0.576799	0.323301	0.692164	0.663791	0.255327	0.831258	0.219645	0.707994	0.999991	2.03182	0.000447917	0.00168773	0.11	0.235	0.287	0.15	1.172	1
70821	NM_027564	4921507P07Rik	-0.411426	0.406098	0.752883	0.266196	0.582502	0.940247	-0.444294	0.371565	0.999991	-1.01333	0.0464347	0.0970373	0.113	0.069	0.144	0.069	0.036	1
70858	NR_045829	4921511I17Rik	1.13291	0.0314612	0.210618	-0.0153954	0.977789	0.995097	0.0240783	0.965314	0.999991	3.54638	1.40726e-12	1.88509e-11	0.023	0.109	0.023	0.023	0.918	1
66714	NM_025722	4921524J17Rik	-0.0202928	0.885028	0.969121	-0.0624285	0.656643	0.95142	-0.0465334	0.740589	0.999991	-0.411456	0.00360442	0.0106738	11.23	10.113	10.783	10.559	8.296	1
66730	NR_033782	4921531C22Rik	0.439631	0.0935974	0.409401	0.335059	0.20356	0.781603	0.313644	0.236118	0.999991	1.19066	3.05114e-06	1.86177e-05	0.522	0.663	0.675	0.64	1.241	1
228602	NM_029432	4930402H24Rik	-0.0999053	0.67661	0.897698	-0.0375798	0.875263	0.983181	0.0900758	0.706593	0.999991	0.637589	0.00746429	0.0201149	1.453	1.236	1.426	1.495	2.282	0
432479	NM_001014836	4930404N11Rik	0.574746	0.000838917	0.0143707	0.144218	0.405481	0.905371	-0.342106	0.0514542	0.999991	1.27063	9.91481e-14	1.48587e-12	11.189	15.381	12.434	8.507	27.214	1
74629	NR_024323	4930426L09Rik	0.343297	0.336493	0.704541	-0.365329	0.326415	0.875494	-0.282712	0.447154	0.999991	3.08812	2.40954e-20	6.05313e-19	0.28	0.341	0.205	0.212	2.944	1
104732	NM_134041	4930427A07Rik	0.13387	0.550201	0.838005	-0.667388	0.00291029	0.0675516	0.0685624	0.759627	0.999991	-1.55476	4.25859e-12	5.45693e-11	56.351	56.748	35.005	56.977	18.246	1
68281	NM_175128	4930430F08Rik	0.0190872	0.932503	0.980319	0.217057	0.334085	0.880103	0.120795	0.591791	0.999991	-0.453201	0.0463022	0.0968224	2.445	2.265	2.873	2.613	1.741	0
73985	NR_125720	4930445N18Rik	0.698761	0.242801	NA	0.259033	0.667605	0.953177	0.297436	0.622115	0.999991	1.65628	0.00484783	0.0137973	0	0.047	0.017	0.017	0.172	1
74684	NR_073370	4930451G09Rik	3.28631	2.35858e-21	7.28898e-19	0.119982	0.74039	0.969178	0.695173	0.0515587	0.999991	1.44159	4.17492e-05	0.000198309	0.258	2.882	0.286	0.413	0.752	1
74430	NM_028934	4930452B06Rik	0.515268	0.360755	0.722455	1.25115	0.024262	0.298625	0.670454	0.233444	0.999991	1.23427	0.0263586	0.0599077	0.017	0.036	0.089	0.045	0.086	0
73990	NR_045352	4930455C13Rik	-0.192996	0.42306	0.765034	-0.289329	0.230221	0.806057	0.0319466	0.894349	0.999991	-0.689186	0.00447063	0.0128803	8.996	7.155	7.361	8.949	5.411	1
74953	NR_045354	4930483K19Rik	0.252529	0.144701	0.504061	-0.374827	0.0355488	0.368677	0.0553475	0.751936	0.999991	-0.639313	0.000427261	0.00161616	2.936	3.218	2.256	2.952	1.834	0
214639	NM_178098	4930486L24Rik	-0.76223	0.0210246	0.162519	-0.406341	0.217321	0.792097	-0.12146	0.711913	0.999991	-2.87498	6.93401e-17	1.37433e-15	5.097	2.621	3.753	4.508	0.536	0
269033	NM_172967	4930503L19Rik	-0.171084	0.486651	0.804515	-0.0880758	0.720123	0.962673	0.0618474	0.80127	0.999991	-0.756546	0.00219608	0.00690268	6.327	5.114	5.998	6.385	3.611	0
75060	NR_073374	4930506C21Rik	0.258661	0.122113	0.465643	0.271203	0.104815	0.625705	0.174955	0.299835	0.999991	0.583737	0.000400163	0.00152447	2.898	3.189	3.526	3.183	4.334	1
74706	NR_027926	4930507D05Rik	0.199669	0.411686	0.756317	-0.0198596	0.935304	0.991725	0.161865	0.506931	0.999991	-0.52592	0.0347344	0.0759876	1.236	1.306	1.227	1.342	0.83	0
74724	NR_033573	4930512B01Rik	0.955716	0.0913408	0.403728	0.579965	0.30962	0.867686	0.212278	0.712978	0.999991	2.23821	5.49141e-05	0.000254406	0.022	0.093	0.065	0.033	0.356	0
319960	NR_015574	4930513N10Rik	0.0535989	0.833146	0.952032	-0.334072	0.190309	0.772055	0.033617	0.89494	0.999991	-0.55856	0.0288731	0.0648291	4.158	3.952	3.294	4.141	2.732	1
75116	NR_040383	4930520O04Rik	-0.237654	0.343306	0.70962	-0.0502929	0.840037	0.979392	0.104094	0.675299	0.999991	-2.00687	8.37134e-13	1.14362e-11	1.892	1.462	1.874	2.001	0.454	1
67647	NM_001162896	4930523C07Rik	-0.546483	0.000610986	0.0111472	0.133753	0.399088	0.905071	-0.0439207	0.782222	0.999991	-0.925748	7.56088e-09	6.92034e-08	7.327	4.553	8.084	6.939	3.756	1
619677	NR_033593	4930529C04Rik	-0.0374849	0.926992	0.978765	-0.331931	0.417247	0.907426	-0.025516	0.950268	0.999991	-1.02499	0.0123134	0.0309766	8.084	7.199	6.247	7.668	3.519	0
77594	NR_045318	4930552P12Rik	0.341158	0.567123	0.84656	0.18132	0.76158	0.971704	0.326177	0.584761	0.999991	1.62315	0.00561739	0.0156797	0.009	0.019	0.015	0.018	0.104	1
75323	NR_037999	4930558J18Rik	-0.418968	0.121342	0.46401	-0.41266	0.126984	0.674625	-0.219994	0.414193	0.999991	-2.13312	6.19869e-13	8.5387e-12	1.282	0.86	0.95	1.051	0.245	0
75255	NR_038030	4930562F07Rik	-0.60397	0.00403475	0.0491143	0.0907822	0.661084	0.95142	-0.0238737	0.908507	0.999991	-1.06475	5.85095e-07	4.03152e-06	7.897	4.68	8.475	7.597	3.619	1
75939	NM_029482	4930579G24Rik	-0.112132	0.521473	0.823512	-0.0380389	0.827751	0.979392	0.0972774	0.577749	0.999991	-1.20023	1.20295e-11	1.46968e-10	12.499	10.546	12.212	13.054	5.271	1
70942	NR_045306	4931403E22Rik	-0.138352	0.752944	0.9263	-0.689004	0.127749	0.675769	-0.927184	0.0442815	0.999991	1.02254	0.0154535	0.0377209	0.464	0.376	0.24	0.173	1.078	1
70934	NR_038172	4931403G20Rik	0.507736	0.395959	0.745661	0.822644	0.166826	0.745601	0.363052	0.545288	0.999991	1.46909	0.0127002	0.031818	0.005	0.024	0.04	0.018	0.098	1
70984	NM_001199484	4931406C07Rik	0.177469	0.412199	0.756796	-0.208344	0.337467	0.881432	0.146579	0.498603	0.999991	0.625768	0.00372841	0.0109839	3.965	4.111	3.423	4.256	6.14	1
70973	NR_045183	4931431B13Rik	0.673048	0.130716	0.482879	-1.02802	0.0306278	0.339539	-0.675313	0.149578	0.999991	1.81077	3.36054e-05	0.000162902	0.672	1.107	0.226	0.326	2.982	1
74364	NR_045807	4931431C16Rik	0.284366	0.394459	0.744243	-0.329722	0.328404	0.876457	0.038772	0.908008	0.999991	1.64742	5.93959e-07	4.08919e-06	0.745	0.846	0.585	0.743	2.552	1
70980	NM_027634	4931431F19Rik	0.234972	0.662141	0.890756	-1.6867	0.00308161	0.0709999	-0.100009	0.853893	0.999991	-1.11874	0.045577	0.0955834	0.097	0.113	0	0.084	0.02	1
229227	NM_172679	4932438A13Rik	-0.403499	0.0372258	0.235271	-0.270164	0.162983	0.742151	0.0885492	0.647374	0.999991	-0.582331	0.0026499	0.00814633	7.975	5.475	6.636	8.245	5.197	1
545732	NM_001177510	4933402N22Rik	1.82378	0.000162001	0.00360761	0.48877	0.319251	0.872945	-0.356009	0.4767	0.999991	0.980266	0.0443524	0.0934657	0.287	1.329	0.456	0.188	0.699	1
71141	NR_037692	4933407L21Rik	0.644657	0.259663	0.639779	-0.112439	0.847089	0.979674	0.207717	0.719883	0.999991	1.23361	0.0290172	0.0651174	0.034	0.085	0.027	0.047	0.173	1
74454	NR_045810	4933408J17Rik	0.399117	0.00407103	0.0494764	0.321448	0.0207753	0.271629	0.104102	0.45526	0.999991	-0.522476	0.000199751	0.000813672	13.216	16.01	16.543	13.795	9.04	0
66765	NM_025752	4933411K16Rik	-0.436885	0.460293	0.790273	-0.209771	0.721521	0.962971	-0.286657	0.627397	0.999991	1.17079	0.0403559	0.0862087	0.033	0.01	0.022	0.016	0.142	1
71149	NM_027697	4933413G19Rik	-0.113458	0.681804	0.898554	0.334032	0.222091	0.797361	0.327241	0.232463	0.999991	-0.649298	0.0214056	0.0500403	1.906	1.602	2.448	2.368	1.156	1
74477	NM_028963	4933427D14Rik	-0.20442	0.189971	0.564133	0.0333628	0.830214	0.979392	0.0725878	0.64094	0.999991	-0.647744	3.662e-05	0.000175594	5.093	4.03	5.232	5.166	3.182	0
214106	NM_177607	4933430I17Rik	-0.185624	0.657601	0.887923	0.228954	0.580096	0.940247	0.136649	0.742336	0.999991	-1.0835	0.0127569	0.0319406	0.327	0.255	0.396	0.36	0.121	0
99650	NM_025762	4933434E20Rik	0.185274	0.0590065	0.317081	0.101538	0.301432	0.864448	0.119305	0.2251	0.999991	0.226099	0.0211834	0.049598	19.189	19.66	19.259	20.224	22.127	1
381622	NM_207657	5031410I06Rik	0.34648	0.559322	0.843691	0.346692	0.559084	0.93664	0.312008	0.599717	0.999991	1.59187	0.00628982	0.0173284	0.008	0.017	0.018	0.016	0.085	0
271221	NM_198642	5031414D18Rik	1.41576	0.00136004	0.0211232	-0.434338	0.38208	0.900177	0.896888	0.0488617	0.999991	5.20475	1.76748e-36	1.09425e-34	0.026	0.111	0.012	0.073	2.173	1
223739	NM_001033273	5031439G07Rik	1.02447	9.92132e-05	0.00238474	-0.645464	0.0144105	0.213462	-0.206145	0.434186	0.999991	1.61757	7.8435e-10	8.06801e-09	8.607	16.568	5.407	7.176	27.605	1
74487	NR_015591	5430405H02Rik	0.0868222	0.435313	0.774065	0.222547	0.0439968	0.41466	0.240158	0.0301878	0.999991	-0.600318	2.77238e-07	2.0404e-06	4.802	4.665	5.623	5.494	3.1	1
100503199	NR_034038	5430416N02Rik	0.138293	0.373692	0.729553	0.324391	0.0360119	0.372243	0.0495841	0.750892	0.999991	-0.494962	0.00185384	0.0059266	11.137	11.236	13.979	11.116	7.738	1
71398	NM_001163539	5430427O19Rik	1.0416	0.000158084	0.00353078	-1.05437	0.000187994	0.00796829	-0.78474	0.00526516	0.746249	1.49575	5.45852e-08	4.45137e-07	1.395	2.737	0.639	0.75	4.119	1
71445	NR_015467	5530601H04Rik	0.214708	0.148875	0.509506	-0.126232	0.400825	0.905071	0.111294	0.456526	0.999991	0.627654	2.0603e-05	0.000104823	2.019	2.149	1.858	2.105	3.098	1
230757	NM_001013755	5730409E04Rik	0.410025	0.459355	0.789852	0.127226	0.818635	0.979392	-0.029574	0.957541	0.999991	1.67041	0.00249018	0.00772429	0.211	0.297	0.246	0.197	1.068	1
70538	NR_045341	5730435O14Rik	0.702625	0.181402	0.553892	-0.0167488	0.975484	0.995097	0.22139	0.681916	0.999991	4.33404	3.45532e-19	7.98832e-18	0.05	0.147	0.05	0.075	3.578	1
67313	NM_028872	5730559C18Rik	0.612249	0.00525019	0.060321	-0.0324697	0.882491	0.984451	0.0106685	0.961268	0.999991	-0.83339	0.000155645	0.000649538	11.898	16.86	11.674	11.629	6.446	1
244234	NM_001128146	5830411N06Rik	-0.583638	0.215057	0.592924	0.0635446	0.892623	0.986101	-0.00899228	0.98476	0.999991	-2.69999	9.77842e-09	8.76414e-08	186.5	104.582	197.438	176.389	17.777	1
100529079	NR_040466	5830418P13Rik	-0.0570065	0.802117	0.94369	0.139992	0.538056	0.933437	0.0200722	0.929685	0.999991	-0.584811	0.0102935	0.0265862	14.875	13.063	16.449	14.477	9.625	1
319616	NR_015517	5930412G12Rik	1.04167	0.0292321	0.200299	-0.311232	0.538376	0.933437	-0.336845	0.5076	0.999991	1.53086	0.00117273	0.00395615	0.051	0.13	0.035	0.032	0.213	1
319982	NR_102383	5930430L01Rik	-0.501411	0.11217	0.448768	0.0312975	0.920397	0.989866	0.315113	0.313153	0.999991	-1.27181	7.5822e-05	0.000340119	0.901	0.574	0.915	1.102	0.331	0
319477	NM_176921	6030419C18Rik	0.59272	0.302309	0.677422	0.190576	0.74046	0.969178	-0.078631	0.891433	0.999991	1.47489	0.0101333	0.0262463	0.238	0.419	0.299	0.212	1.096	1
320719	NR_102315	6030443J06Rik	-0.0572265	0.843473	0.955839	0.0637144	0.825333	0.979392	-0.0612567	0.833031	0.999991	-0.630199	0.0337558	0.0740915	0.36	0.316	0.38	0.332	0.22	0
77727	NM_029964	6030468B19Rik	0.220629	0.662604	0.890867	1.3856	0.00428065	0.0907195	0.88289	0.0737512	0.999991	2.36629	6.46166e-07	4.43384e-06	0.079	0.097	0.341	0.208	0.769	1
70730	NM_027529	6330409D20Rik	-0.11028	0.685353	0.899801	-0.203076	0.457701	0.916685	-0.271188	0.324871	0.999991	0.936713	0.000353641	0.00136549	1.156	0.972	0.997	0.909	2.272	0
230279	NM_144905	6330416G13Rik	0.0549666	0.698678	0.905493	-0.286929	0.0443345	0.415042	-0.209577	0.141853	0.999991	1.05656	5.98298e-14	9.14881e-13	5.392	5.126	4.418	4.508	11.203	1
69004	NR_045821	6330418K02Rik	0.962029	0.000243836	0.00512835	-0.318033	0.250772	0.826934	-0.10127	0.712274	0.999991	1.87274	3.31495e-13	4.68743e-12	1.534	2.866	1.205	1.37	6.006	0
381933	NM_001033465	6430531B16Rik	0.777342	0.0725897	0.357008	-0.128556	0.774919	0.976267	0.0994993	0.823496	0.999991	1.17077	0.006261	0.0172548	0.201	0.367	0.178	0.213	0.549	1
319582	NM_176952	6430573F11Rik	1.04368	0.0183341	0.147946	-0.570096	0.210489	0.786587	-1.2	0.00999013	0.999991	-1.28575	0.00585574	0.0162599	0.364	0.785	0.221	0.118	0.109	1
78605	NR_040291	6430706D22Rik	-0.296276	0.117444	0.457642	0.118132	0.532353	0.932366	0.10581	0.575987	0.999991	-0.753513	6.89366e-05	0.000311971	58.903	43.634	64.51	61.525	34.054	0
213393	NM_001166580	8430408G22Rik	-0.0173991	0.975393	0.99334	0.646074	0.241338	0.819224	0.0342828	0.951566	0.999991	2.85527	6.18225e-08	5.01682e-07	0.029	0.026	0.081	0.029	0.634	1
71473	NR_040686	8430423G03Rik	-0.145231	0.726437	0.914941	0.0968782	0.813439	0.979392	0.136324	0.740159	0.999991	-1.67477	0.000276108	0.00109424	0.593	0.48	0.645	0.638	0.096	1
71523	NR_045276	8430429K09Rik	-0.210885	0.308866	0.682369	0.0709485	0.729549	0.965874	0.196243	0.338108	0.999991	-0.483942	0.0210919	0.0494327	1.915	1.526	2.053	2.083	1.322	1
217830	NM_145448	9030617O03Rik	0.562254	0.0369537	0.234423	-0.704477	0.00929246	0.158236	0.109051	0.686204	0.999991	1.31245	1.07863e-06	7.1548e-06	5.183	7.136	3.112	5.449	13.376	1
71517	NM_027815	9030624J02Rik	0.0272825	0.869239	0.964385	-0.0617911	0.709348	0.961178	-0.0239684	0.885057	0.999991	0.510825	0.002025	0.00641741	14.741	13.73	14.186	14.158	20.918	1
71583	NM_027834	9130008F23Rik	0.591798	0.257246	0.637945	0.062741	0.906622	0.988002	0.191112	0.720096	0.999991	2.93503	2.45332e-09	2.37293e-08	0.025	0.051	0.028	0.032	0.445	1
100042056	NR_033635	9130019P16Rik	1.05808	0.00126588	0.0201146	-0.722574	0.0332764	0.354781	-0.402203	0.232687	0.999991	2.9522	9.75669e-20	2.33398e-18	0.37	0.757	0.209	0.26	3.355	0
77124	NR_046001	9130221H12Rik	-0.0430652	0.711835	0.909087	0.150301	0.196689	0.776009	0.0851246	0.465104	0.999991	-0.429179	0.000244952	0.00098064	32.892	29.174	36.576	33.977	24.068	1
231253	NR_027961	9130230L23Rik	0.450108	0.447769	0.781814	0.117268	0.844391	0.979674	0.389567	0.512422	0.999991	1.90783	0.000913687	0.00317896	0.005	0.024	0.011	0.021	0.158	1
75758	NM_029418	9130401M01Rik	0.44093	0.00700614	0.0742866	0.207796	0.204815	0.782491	0.165005	0.314606	0.999991	0.3423	0.0365328	0.0793856	12.155	15.163	14.079	13.271	15.296	1
100689703	NR_045696	9330133O14Rik	-0.0325885	0.826636	0.951026	-0.05726	0.700556	0.958443	-0.0735649	0.622084	0.999991	0.48417	0.00100231	0.00344741	3.22	2.875	3.103	2.956	4.472	0
319673	NR_037982	9330159M07Rik	0.745045	0.0427583	0.257861	-0.0398322	0.916237	0.989165	0.234809	0.531601	0.999991	0.86489	0.0183574	0.0438128	0.176	0.295	0.171	0.206	0.349	0
380930	NR_102319	9330188P03Rik	-0.265902	0.654689	0.885966	-0.0663913	0.910863	0.988585	-0.303441	0.610265	0.999991	1.39967	0.0167093	0.0404044	0.079	0.045	0.07	0.043	0.402	1
240185	NM_001081963	9430020K01Rik	0.400017	0.400592	0.748564	0.262842	0.580852	0.940247	0.126435	0.79066	0.999991	1.4162	0.00287695	0.00874834	0.478	0.616	0.607	0.512	1.581	1
77252	NM_029886	9430038I01Rik	0.516196	0.0152078	0.130718	0.362779	0.0892652	0.586871	-0.0106659	0.960693	0.999991	0.543043	0.0106605	0.0273716	2.712	3.601	3.532	2.622	3.968	1
100500713	NR_045916	9530027J09Rik	0.161287	0.226225	0.606968	-0.106851	0.426558	0.908793	0.049175	0.713668	0.999991	-0.363311	0.00745788	0.0201009	5.51	5.643	5.117	5.523	4.207	1
319482	NM_001164655	9530053A07Rik	3.25155	3.56627e-18	8.18242e-16	0.628941	0.118122	0.654287	1.5349	7.73176e-05	0.0410943	0.884973	0.0261424	0.059457	0.023	0.302	0.042	0.086	0.052	1
68283	NM_026739	9530077C05Rik	-0.759083	0.0392138	0.243766	0.134166	0.713886	0.961996	0.137541	0.707114	0.999991	-2.85408	9.44832e-14	1.41854e-12	2.388	1.214	2.643	2.593	0.234	1
319247	NR_045776	9530080O11Rik	-0.229896	0.53813	0.830653	-0.220401	0.555002	0.93664	-0.0988897	0.790999	0.999991	-0.856724	0.0231817	0.0535261	1.549	1.183	1.323	1.411	0.779	1
328829	NM_177824	9830107B12Rik	0.827981	0.168833	0.537241	0.227938	0.706792	0.960472	0.0227647	0.970114	0.999991	2.82637	1.76218e-06	1.12597e-05	0	0.017	0.004	0	0.166	1
268759	NM_001112735	9930012K11Rik	-0.80192	8.4853e-05	0.00209613	0.00321596	0.987167	0.995097	0.272452	0.171466	0.999991	-0.513432	0.0112149	0.0286527	3.207	1.648	3.219	3.788	2.195	1
667214	NM_001114679	9930111J21Rik1	1.28172	2.24904e-06	8.49306e-05	-0.692862	0.0112793	0.182126	-0.288925	0.289492	0.999991	3.33735	5.2521e-35	2.98341e-33	2.899	6.783	1.748	2.276	32.665	1
245240	NM_173434	9930111J21Rik2	1.50416	1.51255e-08	9.42574e-07	-0.56088	0.0364118	0.374885	-0.1212	0.650349	0.999991	3.50753	6.19929e-40	4.63684e-38	4.68	12.836	3.11	4.147	59.364	0
50518	NM_015770	a	-0.406544	0.228548	0.609574	0.844395	0.00820662	0.144152	0.837526	0.0089067	0.999991	-1.85059	1.2618e-06	8.27352e-06	1.022	0.677	1.95	1.887	0.189	1
319487	NR_040374	A230028O05Rik	-0.147592	0.807468	NA	-0.0170845	0.977455	NA	-0.11362	0.851252	0.999991	1.21052	0.0411525	0.0877228	0.006	0.002	0.005	0.003	0.046	1
319278	NM_175687	A230050P20Rik	0.761638	0.000129407	0.00298722	0.118165	0.554627	0.93664	-0.0426595	0.831495	0.999991	0.700822	0.000431608	0.00163111	6.901	10.891	7.506	6.462	11.267	0
320845	NR_015495	A230056P14Rik	0.362183	0.310397	0.683389	0.377903	0.289649	0.856699	0.144204	0.689112	0.999991	0.76634	0.030131	0.0672515	0.495	0.605	0.674	0.537	0.898	1
331547	NR_015600	A230072E10Rik	-0.45533	0.292403	0.667247	0.078095	0.853945	0.980709	-0.116271	0.785889	0.999991	-1.51715	0.000924008	0.00320947	0.148	0.091	0.157	0.126	0.032	0
380977	NR_045326	A330009N23Rik	0.145928	0.714821	0.910175	1.55558	3.24154e-05	0.00190705	0.89661	0.0198129	0.999991	2.05623	2.63782e-08	2.25107e-07	0.164	0.169	0.647	0.361	0.869	1
319556	NR_045835	A330041J22Rik	0.251579	0.680459	NA	0.126627	0.835842	NA	0.157284	0.796899	0.999991	1.29421	0.0330176	0.0727222	0	0.008	0.004	0.004	0.062	0
97159	NM_175287	A430005L14Rik	0.282063	0.090173	0.40152	0.474547	0.00427356	0.0906926	0.049648	0.766463	0.999991	0.401375	0.0157808	0.0384517	11.006	12.282	15.384	11.124	14.429	1
319493	NM_001033378	A430078G23Rik	-0.108349	0.630738	0.874492	-0.827785	0.000255386	0.0102668	-0.0622903	0.782307	0.999991	-0.79879	0.000417468	0.0015831	7.459	6.306	4.143	6.886	4.133	1
214239	NM_001001982	A430105I19Rik	0.540145	0.296731	0.670956	0.513622	0.321153	0.872945	0.266227	0.607754	0.999991	1.98733	0.000114601	0.000494611	0.151	0.232	0.251	0.184	0.912	0
319942	NM_177039	A530016L24Rik	0.169657	0.777347	0.93654	0.584297	0.32852	0.876457	-0.19888	0.741236	0.999991	2.02723	0.00063387	0.00229778	0.021	0.026	0.055	0.012	0.261	1
381287	NM_213615	A530032D15Rik	-0.0590605	0.878498	0.966741	-0.0711732	0.853851	0.980709	0.0115182	0.976216	0.999991	1.26955	0.000936919	0.00324749	1.623	1.422	1.537	1.597	4.328	1
328830	NM_178796	A530064D06Rik	1.96439	1.18269e-05	0.000381052	-0.0184213	0.969981	0.995097	-0.537685	0.290715	0.999991	5.35941	2.23993e-35	1.29916e-33	0.045	0.263	0.044	0.013	3.917	1
100415915	NR_045765	A530072M11Rik	-0.406762	0.274231	0.650985	0.24985	0.48981	0.922134	0.251208	0.488535	0.999991	0.93061	0.00873123	0.0230407	0.334	0.218	0.408	0.394	0.685	1
408254	NR_046182	A630019I02Rik	0.782703	0.176163	0.547487	0.286115	0.623812	0.947856	0.245694	0.674238	0.999991	1.535	0.00741459	0.0199972	0.015	0.046	0.025	0.023	0.112	1
213438	NM_175442	A630033H20Rik	-0.119313	0.60002	0.857182	-0.117366	0.605978	0.945004	-0.146522	0.520288	0.999991	0.488562	0.0304915	0.0679827	2.072	1.739	1.918	1.801	2.903	1
212427	NM_172505	A730008H23Rik	-0.298504	0.213993	0.591673	0.00832378	0.972352	0.995097	0.115169	0.631549	0.999991	-0.729415	0.00240257	0.00747919	62.308	45.926	63.356	65.623	36.318	0
320453	NR_040279	A730090H04Rik	0.541573	0.360225	0.72212	0.725863	0.21936	0.794679	0.330086	0.578107	0.999991	2.07273	0.000406581	0.00154678	0.032	0.075	0.105	0.055	0.44	1
320174	NR_045195	A830082K12Rik	0.76538	0.194567	0.570111	0.243947	0.681011	0.95551	0.447475	0.450111	0.999991	1.70853	0.00352911	0.0104676	0.02	0.063	0.033	0.043	0.192	1
68162	NR_015488	A930003A15Rik	-0.63725	0.212952	0.590792	0.414305	0.417384	0.907426	0.374295	0.463822	0.999991	-1.95616	0.000140903	0.000593711	5.238	2.71	7.609	7.156	0.75	1
77940	NR_028376	A930004D18Rik	0.179746	0.629624	0.87439	0.362189	0.329981	0.877431	0.0242815	0.94824	0.999991	0.78516	0.0338967	0.0743613	0.456	0.482	0.611	0.452	0.841	1
68161	NR_015487	A930005H10Rik	-0.0152409	0.949906	0.986277	-0.130681	0.59164	0.941256	0.0680792	0.778909	0.999991	-0.672011	0.00711765	0.0193067	3.672	3.318	3.32	3.751	2.206	1
100503120	NR_077219	A930006K02Rik	-0.724335	0.00535508	0.0612478	-0.103718	0.68256	0.955565	0.204431	0.416719	0.999991	-1.29376	1.53124e-06	9.88724e-06	2.888	1.546	2.674	3.229	1.08	1
626275	NR_026853	A930012L18Rik	-0.238389	0.67001	0.894676	0.408544	0.458815	0.916685	-0.0554395	0.920842	0.999991	1.4343	0.00827192	0.0219831	0.049	0.032	0.081	0.042	0.216	1
245350	NM_001272033	AA414768	0.847423	0.0708443	0.352402	0.444178	0.35161	0.889087	0.761818	0.106454	0.999991	0.980623	0.0358645	0.0781493	0.074	0.158	0.119	0.152	0.192	1
223921	NM_153416	Aaas	0.0511161	0.727808	0.915682	0.0405362	0.782555	0.976951	0.071108	0.628354	0.999991	-0.389638	0.00813589	0.0216574	28.34	26.848	29.239	28.938	21.323	1
66939	NM_025857	Aagab	0.260544	0.0117194	0.108875	0.218214	0.0348362	0.364926	0.15864	0.125416	0.999991	0.518457	5.06202e-07	3.54106e-06	20.377	22.337	23.8	22.085	28.904	1
269774	NM_001040106	Aak1	-0.239923	0.380472	0.733386	-0.383114	0.16143	0.740529	-0.00121358	0.99646	0.999991	-1.26047	4.19102e-06	2.48485e-05	4.348	3.334	3.325	4.203	1.704	1
224805	NM_198608	Aars2	0.0188148	0.899491	0.973067	0.0486048	0.744155	0.97035	0.239277	0.107834	0.999991	-0.723256	1.45184e-06	9.41133e-06	8.946	8.291	9.27	10.33	5.321	1
69684	NM_144829	Aarsd1	0.514768	0.000135223	0.00308852	0.249176	0.0650754	0.50905	0.0911613	0.500398	0.999991	-0.517642	0.000140333	0.000591929	29.505	38.732	35.073	30.629	20.267	0
67618	NM_026276	Aasdhppt	0.106966	0.359605	0.722037	-0.0470737	0.687523	0.955565	0.00106693	0.992729	0.999991	-0.71216	1.96335e-09	1.92037e-08	8.714	8.584	8.446	8.481	5.221	1
56321	NM_019816	Aatf	0.193962	0.168118	0.536413	0.108872	0.43939	0.910218	0.129228	0.358888	0.999991	-0.552361	9.57625e-05	0.000419548	21.263	22.295	22.974	22.646	14.272	1
11302	NM_007377	Aatk	0.751088	0.126255	0.474931	0.314441	0.522749	0.929984	0.0718019	0.884137	0.999991	2.11415	1.5906e-05	8.26552e-05	0.273	0.48	0.358	0.286	1.676	1
382062	NM_001198794	AB124611	0.6564	0.000562536	0.010465	-0.6592	0.000602366	0.0203811	-0.0497353	0.794771	0.999991	1.32708	2.75593e-12	3.60692e-11	14.662	21.352	9.206	13.747	37.052	1
11303	NM_013454	Abca1	-0.144949	0.631375	0.874741	0.382492	0.201331	0.778675	0.466866	0.118778	0.999991	0.909034	0.00224434	0.00703163	0.232	0.191	0.308	0.317	0.454	1
268379	NM_178259	Abca13	1.47479	0.00851281	0.0857681	-0.0779502	0.891933	0.985925	-0.413799	0.474566	0.999991	2.00103	0.000336458	0.00130739	0.005	0.025	0.004	0.002	0.043	1
381072	NM_001031621	Abca17	0.0561851	0.919445	0.976826	0.202723	0.714933	0.962106	0.19764	0.721907	0.999991	1.2628	0.0222741	0.0517122	0.088	0.086	0.109	0.104	0.303	1
11305	NM_007379	Abca2	-0.247057	0.227009	0.607994	-0.147742	0.469983	0.918991	0.0489221	0.8109	0.999991	-0.685106	0.00081174	0.00286344	22.951	17.595	20.831	23.006	13.907	0
27410	NM_013855	Abca3	-0.0326359	0.841309	0.954594	-0.0924778	0.570661	0.937661	0.0715066	0.660814	0.999991	1.54738	1.14979e-21	3.1519e-20	3.98	3.571	3.746	4.056	11.769	1
217265	NM_147219	Abca5	1.01224	0.0770139	0.369525	0.795328	0.165058	0.744708	0.609075	0.288234	0.999991	1.60867	0.00488219	0.0138831	0.032	0.094	0.082	0.065	0.184	0
27403	NM_013850	Abca7	-0.132854	0.582223	0.851673	-0.141493	0.557938	0.93664	-0.0540499	0.822899	0.999991	0.525011	0.0296493	0.0662839	20.781	17.282	18.855	19.175	29.99	1
18671	NM_011076	Abcb1a	0.775362	0.0155157	0.132817	0.0442822	0.890531	0.985764	0.0322068	0.920315	0.999991	2.41918	3.34913e-14	5.25747e-13	0.985	1.615	1.023	0.966	5.964	1
18669	NM_011075	Abcb1b	0.775923	0.00330992	0.0419432	-0.426936	0.108329	0.631956	-0.0484874	0.854982	0.999991	1.88058	9.45527e-13	1.28427e-11	2.439	3.924	1.795	2.271	9.487	1
18670	NM_008830	Abcb4	2.2085	1.2781e-16	2.27697e-14	-0.861291	0.00214602	0.0532791	-0.236139	0.391862	0.999991	3.07212	7.48369e-31	3.3985e-29	0.638	2.939	0.333	0.515	5.936	1
74610	NM_029020	Abcb8	0.148222	0.11705	0.45724	0.154154	0.103075	0.620281	0.0559254	0.555317	0.999991	-0.395841	3.43491e-05	0.000165827	12.359	12.533	13.788	12.481	9.266	0
56325	NM_019875	Abcb9	-0.176749	0.397661	0.747144	-0.141097	0.499508	0.924524	0.0938618	0.653155	0.999991	-1.92404	7.29526e-20	1.76045e-18	14.306	11.538	12.954	14.977	3.56	1
17250	NM_008576	Abcc1	0.407596	0.101203	0.424754	-0.779716	0.00174714	0.0459559	0.0947126	0.703419	0.999991	1.27601	2.83372e-07	2.08276e-06	10.248	12.58	5.874	10.641	25.535	1
224814	NM_170680	Abcc10	-0.023397	0.907735	0.975158	0.33335	0.0971605	0.606739	0.105936	0.599465	0.999991	0.636612	0.00148839	0.00489906	1.737	1.564	2.212	1.815	2.707	1
76408	NM_029600	Abcc3	0.950323	0.0258256	0.18447	0.101823	0.816793	0.979392	0.175354	0.689862	0.999991	0.986979	0.020589	0.0483951	0.051	0.107	0.057	0.057	0.12	1
239273	NM_001033336	Abcc4	0.429937	0.0533806	0.297623	-0.174337	0.434747	0.910095	0.186588	0.40245	0.999991	0.646281	0.003662	0.0108114	3.291	4.077	2.931	3.645	5.182	1
27416	NM_013790	Abcc5	-0.517026	0.0146485	0.127265	0.353337	0.0944364	0.597818	0.208052	0.324983	0.999991	-0.816923	0.000117506	0.000505696	7.068	4.303	8.871	7.57	3.824	1
11666	NM_007435	Abcd1	0.293922	0.0666611	0.341145	-0.32377	0.0438204	0.413748	-0.00725285	0.963948	0.999991	0.999326	4.24034e-10	4.50179e-09	16.895	19.004	13.518	16.386	33.796	0
19299	NM_008991	Abcd3	0.570409	0.00369176	0.0458848	-0.267085	0.175733	0.75464	0.0480885	0.807129	0.999991	0.389179	0.047778	0.0993546	7.147	9.799	5.939	7.207	9.322	1
24015	NM_015751	Abce1	0.262137	0.163802	0.531994	-0.103894	0.581164	0.940247	0.0740576	0.694105	0.999991	-0.540871	0.00409662	0.0119157	42.611	46.895	39.858	43.711	28.658	1
224742	NM_013854	Abcf1	0.141779	0.288832	0.6636	0.067703	0.612547	0.946684	0.0951656	0.476578	0.999991	-0.414439	0.00195493	0.0062156	53.336	53.845	56.026	55.531	39.449	1
27407	NM_013853	Abcf2	0.368346	0.0037059	0.0459611	-0.0685899	0.589359	0.940731	0.0365272	0.773746	0.999991	-0.492756	0.000108286	0.00046956	41.931	49.637	40.132	41.876	29.349	1
26357	NM_011920	Abcg2	0.334452	0.219338	0.59932	0.195992	0.472533	0.919293	0.389406	0.152785	0.999991	0.99449	0.000234975	0.000944584	1.37	1.601	1.592	1.769	2.818	1
27405	NM_030239	Abcg3	0.486731	0.00124646	0.0199264	-1.09873	7.20604e-13	3.30588e-10	-0.0225585	0.881529	0.999991	1.80065	3.66008e-33	1.88477e-31	9.829	12.671	4.537	9.369	34.418	1
213012	NM_172511	Abhd10	-0.0186435	0.877602	0.966391	0.0815968	0.498951	0.924413	0.0429778	0.722655	0.999991	-0.29378	0.0163467	0.0396611	7.114	6.019	7.109	6.812	5.501	1
68758	NR_033794	Abhd11	0.108534	0.468735	0.795525	0.26916	0.0718248	0.534251	0.1818	0.224886	0.999991	-0.707413	3.2177e-06	1.95403e-05	13.73	13.514	16.628	14.928	8.22	1
76192	NM_024465	Abhd12	0.446753	0.000602222	0.0110423	0.0703562	0.590647	0.941099	0.0357201	0.785087	0.999991	1.47707	3.05853e-30	1.35907e-28	11.281	14.109	11.862	11.206	31.431	1
76491	NM_029631	Abhd14b	0.0941081	0.649793	0.88297	0.487425	0.0179922	0.248576	-0.088764	0.669947	0.999991	1.13357	3.03703e-08	2.57976e-07	4.126	4.037	5.847	3.755	9.192	0
67477	NM_026185	Abhd15	0.429508	0.0422673	0.255613	-0.805324	0.000151303	0.00661071	0.104395	0.621985	0.999991	0.94021	8.57226e-06	4.74546e-05	9.574	11.899	5.418	9.954	18.522	1
193742	NM_178592	Abhd16a	0.0423027	0.756437	0.927719	0.127499	0.34959	0.888794	0.0852155	0.532197	0.999991	0.607029	7.98359e-06	4.4404e-05	18.976	17.878	20.796	19.53	28.764	1
241850	NM_183181	Abhd16b	0.655572	0.23156	0.613455	0.238077	0.668634	0.953323	-0.290668	0.60956	0.999991	2.76814	1.20037e-07	9.285e-07	0.022	0.055	0.034	0.009	0.421	1
216169	NM_145421	Abhd17a	0.413395	0.0290891	0.199772	0.229276	0.226292	0.801475	0.14081	0.457553	0.999991	0.484587	0.0105197	0.0270647	46.327	56.782	54.589	49.873	64.631	1
70178	NM_133722	Abhd17c	0.0200682	0.905189	0.974983	-0.0892464	0.59649	0.942578	-0.0421289	0.802663	0.999991	-0.628784	0.000199823	0.000813766	19.836	18.384	18.709	18.768	12.575	1
105501	NM_134076	Abhd4	0.121825	0.720295	0.912297	0.0878975	0.796174	0.978927	0.0740618	0.827781	0.999991	1.22048	0.000317974	0.00124287	2.59	2.595	2.794	2.669	6.482	1
67469	NM_026179	Abhd5	0.382388	0.158752	0.523103	0.00746156	0.978183	0.995097	-0.0223772	0.93475	0.999991	1.43093	1.01011e-07	7.92463e-07	1.102	1.332	1.112	1.05	3.108	0
66082	NM_025341	Abhd6	0.626022	3.46213e-05	0.000961964	-0.266789	0.086996	0.579651	0.115735	0.452125	0.999991	1.54915	1.87587e-25	6.6541e-24	2.817	4.005	2.337	2.966	8.272	1
64296	NM_022419	Abhd8	-0.342585	0.0498237	0.285032	0.295141	0.0907392	0.588516	0.244008	0.162042	0.999991	-1.78633	2.49764e-24	8.19165e-23	54.964	39.429	67.816	63.675	15.359	0
11308	NM_145994	Abi1	0.120511	0.463685	0.792147	-0.0786811	0.632515	0.947856	-0.0567534	0.73019	0.999991	0.676869	3.78521e-05	0.000180889	21.085	20.948	20.068	19.673	33.49	1
66610	NM_025659	Abi3	-0.00923772	0.957106	0.987876	-0.875529	3.59825e-07	3.92487e-05	0.15632	0.36268	0.999991	0.558405	0.00114055	0.00385704	30.594	28.018	16.656	33.301	45.289	0
320712	NM_001014423	Abi3bp	-0.0179125	0.970803	0.992565	1.72396	0.000238539	0.00974014	-0.22188	0.653716	0.999991	1.77816	0.000149869	0.000628285	0.042	0.041	0.219	0.036	0.217	0
11352	NM_009595	Abl2	-0.0614376	0.774102	0.935683	-0.0632834	0.767509	0.973777	0.116842	0.585105	0.999991	-0.450909	0.0353271	0.077141	5.623	4.934	5.422	5.919	4.025	1
226251	NM_001103178	Ablim1	-0.84827	1.62768e-09	1.17933e-07	0.295653	0.0353763	0.36757	0.206898	0.14095	0.999991	-2.02693	6.92753e-47	7.58358e-45	68.757	34.634	85.204	77.34	16.312	1
109934	NM_198018	Abr	0.594423	0.000170357	0.00377704	-0.626208	7.67086e-05	0.00382269	0.125875	0.426224	0.999991	1.22652	8.49902e-15	1.4077e-13	35.394	49.035	22.903	37.394	81.421	1
30946	NM_013924	Abt1	0.125685	0.367188	0.724963	0.124285	0.372564	0.896936	0.101049	0.469028	0.999991	-0.399659	0.00446867	0.0128778	4.286	4.279	4.681	4.475	3.198	0
80283	NM_030251	Abtb1	-0.687888	9.80149e-05	0.00235968	0.736357	2.70067e-05	0.00162645	0.0657044	0.708748	0.999991	-0.442594	0.0120721	0.0305032	19.329	10.846	32.499	19.569	13.946	1
99382	NM_178890	Abtb2	-0.818656	4.72924e-06	0.000167325	-0.0705624	0.692509	0.956791	0.136121	0.445395	0.999991	-2.24181	2.62251e-35	1.51046e-33	14.25	7.289	13.632	15.264	2.864	1
113868	NM_130864	Acaa1a	0.240955	0.0838173	0.38766	0.110158	0.429573	0.909837	0.0888594	0.524203	0.999991	0.591821	2.11564e-05	0.000107307	27.729	30.025	29.93	28.63	41.56	0
235674	NM_146230	Acaa1b	0.234714	0.334926	0.703082	0.178924	0.462417	0.918082	0.109255	0.653827	0.999991	0.527334	0.0301228	0.0672424	9.88	10.724	11.193	10.305	14.311	0
52538	NM_177470	Acaa2	-0.0627047	0.756584	0.927719	0.121343	0.548464	0.936184	0.183941	0.363029	0.999991	-0.721893	0.000368531	0.00141637	37.955	33.173	41.455	42.118	22.469	1
107476	NM_133360	Acaca	0.18946	0.38909	0.740013	-0.307328	0.162561	0.741686	0.115202	0.600529	0.999991	-0.974005	9.77602e-06	5.3403e-05	13.939	14.6	11.278	14.78	6.85	1
338350	NM_178799	Acad12	0.0912382	0.643364	0.879906	0.447084	0.0216477	0.278866	0.235456	0.23088	0.999991	0.573906	0.00310908	0.00936633	1.301	1.271	1.796	1.495	1.944	0
66948	NM_025862	Acad8	0.375543	0.00209633	0.0296403	0.160125	0.191574	0.77338	0.185992	0.129676	0.999991	0.322592	0.00832938	0.022118	5.055	6.015	5.67	5.61	6.266	1
11363	NM_007381	Acadl	-0.692631	1.30806e-07	6.64697e-06	-0.0542417	0.67846	0.954969	-0.0946729	0.469522	0.999991	-0.468745	0.000349421	0.00135078	43.27	24.316	41.699	39.286	30.747	1
11364	NM_007382	Acadm	0.277439	0.0980701	0.41904	0.20585	0.219835	0.794841	-0.163843	0.330061	0.999991	1.10753	3.4978e-11	4.12107e-10	14.697	16.337	17.047	12.719	31.798	1
66885	NM_025826	Acadsb	0.0407501	0.832951	0.952032	-0.251572	0.19374	0.774662	0.0704021	0.715636	0.999991	0.403462	0.0364368	0.0792168	6.45	6.06	5.427	6.584	8.488	1
11370	NM_017366	Acadvl	0.320264	0.0441341	0.263846	0.305687	0.0547208	0.467435	0.117886	0.459265	0.999991	0.734436	3.80582e-06	2.2777e-05	19.82	22.706	24.608	20.965	32.921	0
78618	NM_030138	Acap2	-0.376759	0.0896163	0.400904	-0.751591	0.000718824	0.0234565	-0.177663	0.423313	0.999991	0.542819	0.0142884	0.0352412	7.299	5.085	4.28	6.251	10.651	1
110460	NM_009338	Acat2	0.232874	0.00290197	0.0378707	-0.295862	0.000168617	0.00724542	-0.00104081	0.989413	0.999991	-0.759997	8.62224e-22	2.39942e-20	40.508	43.569	33.034	39.254	23.57	0
224530	NM_153151	Acat3	0.215447	0.0565828	0.30888	-0.0502739	0.656765	0.95142	0.042312	0.708374	0.999991	-0.687442	1.42041e-09	1.41356e-08	47.156	50.122	45.516	47.215	28.821	0
74159	NM_001102437	Acbd5	-0.0752741	0.7043	0.907194	-0.13279	0.50333	0.925405	-0.0303588	0.878369	0.999991	0.714739	0.000297962	0.00117085	5.682	4.966	5.23	5.451	9.355	1
230379	NM_139306	Acer2	-0.533816	0.176217	0.547487	-0.0205435	0.958096	0.995097	0.101463	0.795089	0.999991	-0.907154	0.022833	0.0528242	0.334	0.198	0.33	0.349	0.158	1
66190	NM_025408	Acer3	1.37625	2.38615e-15	3.64985e-13	-0.0489325	0.780732	0.976764	0.175687	0.316704	0.999991	1.23837	1.07857e-12	1.45898e-11	3.298	7.988	3.198	3.608	7.819	1
56215	NM_023190	Acin1	0.00686336	0.953107	0.987387	0.0384987	0.7415	0.969657	0.0970062	0.405882	0.999991	-0.241053	0.0389647	0.0837238	94.077	93.024	102.823	97.372	81.017	0
12778	NM_001271607	Ackr3	0.667864	0.228481	0.609574	0.895546	0.105855	0.627568	0.350214	0.528915	0.999991	2.33573	2.23023e-05	0.000112327	0.121	0.232	0.329	0.177	1.241	1
11429	NM_080633	Aco2	0.0617351	0.661569	0.890185	-0.297553	0.0349265	0.364926	0.0465074	0.74159	0.999991	-0.568174	5.66849e-05	0.000261866	118.308	112.967	96.502	118.927	78.561	1
217700	NM_172580	Acot6	-0.130185	0.805746	0.944538	0.359787	0.494476	0.923254	0.27731	0.599025	0.999991	1.21508	0.0202742	0.0477533	0.229	0.183	0.326	0.299	0.713	0
56360	NM_019736	Acot9	0.221697	0.247514	0.628981	0.0759497	0.69246	0.956791	-0.0985272	0.609009	0.999991	0.752076	8.1206e-05	0.000362206	6.215	6.652	6.581	5.635	10.509	0
11430	NM_015729	Acox1	-0.0827462	0.605751	0.860819	0.0523996	0.743592	0.97035	0.0382359	0.811439	0.999991	0.505124	0.00158065	0.00515944	8.984	7.743	9.374	8.956	12.696	0
93732	NM_053115	Acox2	-1.56483	0.00126478	0.0201146	-0.0386006	0.932083	0.990705	0.446791	0.318217	0.999991	-2.5319	9.77541e-07	6.51826e-06	0.174	0.031	0.163	0.227	0	1
80911	NM_030721	Acox3	0.529826	0.000562274	0.010465	-0.0554174	0.719267	0.962106	0.0231684	0.880545	0.999991	1.79256	1.01077e-31	4.77374e-30	7.412	9.846	7.172	7.311	25.882	1
11432	NM_007387	Acp2	0.0150885	0.921548	0.977651	0.108187	0.479811	0.920652	0.048313	0.75257	0.999991	0.484239	0.00152744	0.00500866	6.437	5.949	6.956	6.433	8.955	0
11433	NM_001102404	Acp5	-0.68309	8.94915e-09	5.71802e-07	0.294324	0.0122392	0.193618	-0.164321	0.164097	0.999991	-1.14895	9.39449e-22	2.59684e-20	28.515	16.096	34.937	24.56	12.388	1
66659	NM_019800	Acp6	-0.206329	0.0477595	0.277096	0.0458068	0.658764	0.95142	0.0267674	0.796692	0.999991	-0.343708	0.00101815	0.00349388	15.324	12.125	15.848	15.134	11.891	1
94180	NM_053178	Acsbg1	-0.0276667	0.946818	0.985461	0.421753	0.305952	0.865721	0.249638	0.545923	0.999991	1.22146	0.0028018	0.00853867	0.349	0.312	0.496	0.419	0.927	1
14081	NM_007981	Acsl1	0.694068	3.06684e-05	0.000864825	-0.175747	0.296938	0.860354	0.13711	0.413937	0.999991	1.59037	6.9082e-22	1.93547e-20	2.867	4.288	2.545	3.069	8.75	1
74205	NM_028817	Acsl3	-0.0134425	0.954373	0.987387	-0.162495	0.489329	0.922134	0.0143794	0.951202	0.999991	-0.873403	0.00020981	0.000850457	9.623	8.631	8.621	9.425	5.105	1
433256	NM_027976	Acsl5	0.287786	0.0335626	0.22026	-0.0855599	0.527787	0.931716	-0.144079	0.287827	0.999991	1.13764	4.0804e-17	8.15588e-16	42.795	47.866	40.423	37.698	93.984	1
20216	NM_016870	Acsm3	-0.338901	0.100043	0.422932	-0.0400198	0.844196	0.979674	-0.267679	0.193936	0.999991	-0.822796	9.97162e-05	0.000435369	1.299	0.926	1.267	1.035	0.696	0
60525	NM_019811	Acss2	-0.318673	0.00487667	0.0571575	0.336431	0.00264466	0.0631722	0.0172069	0.878558	0.999991	-0.818654	9.70792e-13	1.3175e-11	8.463	6.194	10.741	8.31	4.708	1
74945	NR_040613	Acss2os	-0.255671	0.347012	0.713337	0.0082586	0.975369	0.995097	-0.0484534	0.857316	0.999991	-0.73946	0.00885717	0.023321	1.676	1.265	1.691	1.569	0.938	1
11475	NM_007392	Acta2	0.70465	0.0812667	0.381323	0.442241	0.27402	0.843009	0.0927762	0.818599	0.999991	2.33584	7.27379e-09	6.66495e-08	4.481	7.196	6.399	4.571	28.206	1
11461	NM_007393	Actb	0.42544	0.0291565	0.199987	-0.354161	0.0693946	0.525	-0.144518	0.458711	0.999991	0.946892	1.20347e-06	7.93514e-06	1794.13	2219.16	1395.55	1567.87	3469.95	1
11465	NM_009609	Actg1	0.679038	4.18229e-06	0.000150077	-0.293885	0.046427	0.426232	-0.370398	0.0120767	0.999991	1.16149	3.48425e-15	5.9932e-14	751.185	1106.41	612.564	563.021	1680.52	0
11468	NM_009610	Actg2	0.197738	0.718776	0.911126	0.471052	0.390629	0.901057	0.260073	0.635789	0.999991	2.36431	1.55509e-05	8.09884e-05	0.715	0.803	1.16	0.887	6.646	1
56456	NM_019673	Actl6a	0.197832	0.0551918	0.304026	-0.0763831	0.459656	0.916727	0.168256	0.103096	0.999991	-0.814147	4.37181e-15	7.44243e-14	56.685	59.484	53.926	61.842	31.703	0
109711	NM_134156	Actn1	0.706989	6.71458e-06	0.000230564	-0.217713	0.165933	0.744708	0.228183	0.146337	0.999991	1.32345	3.42344e-17	6.89275e-16	53.809	80.979	46.424	61.439	135.134	1
226977	NM_146107	Actr1b	0.427623	0.000964589	0.016151	-0.0139805	0.914232	0.989044	0.0995712	0.442949	0.999991	1.32974	7.89379e-25	2.67935e-23	29.837	36.825	29.702	30.917	74.834	1
66713	NM_146243	Actr2	0.554861	0.00299925	0.0387087	-0.318759	0.0883219	0.584555	-0.153093	0.413021	0.999991	0.803284	1.73248e-05	8.94655e-05	83.931	113.638	67.273	73.382	146.512	1
74117	NM_023735	Actr3	0.600545	0.000281535	0.00579251	-0.374411	0.0236132	0.293949	-0.173713	0.293634	0.999991	1.12558	9.92549e-12	1.22104e-10	177.349	247.096	137.301	152.824	387.458	1
67019	NM_025914	Actr6	0.0614649	0.651091	0.883492	-0.168547	0.217678	0.792194	0.0329014	0.809186	0.999991	-0.323436	0.0186264	0.044378	6.617	6.312	5.888	6.564	5.191	1
11477	NM_001110204	Acvr1	0.17511	0.692525	0.903109	0.0193364	0.965202	0.995097	-0.388767	0.381972	0.999991	1.45469	0.000968327	0.00334303	0.767	0.818	0.79	0.521	2.528	0
11480	NM_007396	Acvr2a	-0.107121	0.661501	0.890173	0.42762	0.0776017	0.553466	0.062849	0.796866	0.999991	0.697088	0.00389352	0.0113992	0.674	0.57	0.928	0.683	1.107	1
11481	NM_007397	Acvr2b	-0.145906	0.459512	0.790008	-1.07831	8.50416e-08	1.11988e-05	-0.0615665	0.754919	0.999991	-1.10662	4.06639e-08	3.38456e-07	0.827	0.682	0.385	0.769	0.37	1
109652	NM_025371	Acy1	1.36849	6.35576e-23	2.23826e-20	0.321766	0.0238978	0.295854	0.400219	0.00495075	0.719679	1.11612	1.27153e-15	2.26248e-14	4.199	10.071	5.277	5.415	9.119	1
66204	NM_025421	Acyp1	0.0571158	0.72568	0.914479	0.204612	0.208036	0.784934	0.0452394	0.781287	0.999991	-0.680885	3.53866e-05	0.000170388	25.214	23.978	29.046	25.284	15.35	1
11486	NM_007398	Ada	0.011642	0.949577	0.986177	-0.0832029	0.651437	0.951267	0.204316	0.266854	0.999991	-0.836311	6.16327e-06	3.5034e-05	21.27	19.623	20.078	23.993	11.593	1
75894	NM_001290811	Adal	0.0951217	0.603865	0.859591	-0.0290942	0.874104	0.983181	0.0957977	0.60162	0.999991	-0.381365	0.0388981	0.0836133	4.666	4.565	4.602	4.859	3.519	1
11488	NM_001110778	Adam11	1.29122	1.11153e-05	0.000363541	-0.714373	0.0161131	0.230792	-0.226354	0.444242	0.999991	2.92414	1.97081e-23	6.01061e-22	1.595	3.797	0.936	1.3	13.648	1
11490	NM_001037722	Adam15	0.873051	0.00243357	0.0333175	1.22604	2.01468e-05	0.001257	0.347645	0.228954	0.999991	2.6561	1.93408e-20	4.90343e-19	1.983	3.454	4.924	2.481	13.898	0
11491	NR_120376	Adam17	0.0518136	0.772779	0.935502	-0.101672	0.571149	0.937661	0.133018	0.458523	0.999991	0.455563	0.0110598	0.0282913	13.632	12.927	12.759	14.543	18.589	1
11492	NM_009616	Adam19	0.213095	0.510697	0.816736	-0.579244	0.0738892	0.540837	-0.06839	0.832833	0.999991	-1.74213	7.88715e-08	6.28312e-07	15.605	16.718	10.197	14.48	4.164	1
11495	NM_009618	Adam2	-0.536521	0.313709	0.687	0.329395	0.527762	0.931716	-0.344872	0.515826	0.999991	-1.9096	0.000635024	0.00230146	0.101	0.052	0.138	0.067	0	1
11496	NM_001098225	Adam22	1.05728	0.0602515	0.321271	0.598717	0.288145	0.855453	0.507171	0.368586	0.999991	1.55447	0.00567274	0.0158209	0.039	0.112	0.077	0.067	0.195	1
13522	NM_001048175	Adam28	1.43318	0.0150112	NA	0.12679	0.833609	0.979392	0.298198	0.620638	0.999991	1.50976	0.0103405	0.0266741	0	0.037	0.003	0.006	0.047	1
110751	NM_033615	Adam33	0.363164	0.531956	0.82877	0.0922041	0.874794	0.983181	0.402336	0.488994	0.999991	2.2062	8.26208e-05	0.000367821	0.007	0.015	0.01	0.017	0.131	1
11499	NM_007401	Adam5	-0.0122371	0.983568	0.994101	0.193787	0.74375	0.97035	-0.0851184	0.886268	0.999991	1.51249	0.00991933	0.0257283	0.027	0.027	0.042	0.024	0.185	0
11501	NM_001291066	Adam8	0.703488	0.0228041	0.169835	-0.437257	0.158297	0.734957	0.170687	0.581174	0.999991	3.09276	1.13095e-23	3.53395e-22	4.706	7.27	3.419	5.173	46.139	1
11502	NM_007404	Adam9	0.237767	0.512318	0.817525	0.122958	0.734756	0.967512	0.0771334	0.83171	0.999991	1.29149	0.000368475	0.00141637	5.673	6.226	6.298	5.812	15.184	1
58860	NM_021475	Adamdec1	3.04116	8.29198e-10	6.50598e-08	1.14832	0.0223633	0.283826	0.289045	0.571621	0.999991	6.65339	1.49228e-41	1.24583e-39	0.048	0.947	0.19	0.067	18.776	1
237360	NM_001081127	Adamts14	0.0388775	0.941168	0.982565	2.02345	0.000108904	0.0050707	0.108965	0.83613	0.999991	1.45806	0.00535497	0.015054	0.128	0.122	0.835	0.138	0.504	0
235130	NM_001024139	Adamts15	0.260132	0.65958	0.889271	0.332532	0.573109	0.937661	-0.411758	0.489165	0.999991	1.41038	0.0160059	0.0389487	0.016	0.021	0.026	0.006	0.084	0
271127	NM_172053	Adamts16	-0.0127149	0.983258	NA	0.119334	0.843585	0.979674	0.272752	0.651589	0.999991	1.40455	0.0177437	0.0425427	0.002	0.001	0.003	0.005	0.028	1
233332	NM_001033877	Adamts17	0.667683	0.0119749	0.110503	-0.932813	0.000479173	0.0171033	0.0688946	0.795722	0.999991	-1.97523	2.27039e-13	3.27768e-12	3.682	5.477	1.881	3.766	0.855	1
330119	NM_001081401	Adamts3	-0.779028	0.0571725	0.311313	0.00700628	0.986291	0.995097	0.403841	0.321386	0.999991	-2.28982	4.14365e-08	3.43676e-07	0.597	0.293	0.607	0.797	0.089	1
108154	NM_001081020	Adamts6	-0.862801	0.0186054	0.149261	-0.441563	0.227984	0.803974	-0.221711	0.544852	0.999991	-2.01066	4.81971e-08	3.96762e-07	3.927	1.847	2.834	3.143	0.81	1
108153	NM_001003911	Adamts7	0.584064	0.262264	0.641266	0.599112	0.250043	0.826577	0.0797313	0.879869	0.999991	1.95341	0.000135538	0.000573298	0.03	0.052	0.059	0.032	0.196	0
101401	NM_175314	Adamts9	-1.7854	0.000115947	0.00273062	-0.247477	0.586065	0.940731	-0.178746	0.694097	0.999991	-1.91264	3.84498e-05	0.000183533	0.364	0.07	0.3	0.304	0.067	1
269959	NM_001190374	Adamtsl3	-0.712433	0.13899	0.496513	0.25065	0.598631	0.942887	0.504754	0.288448	0.999991	-1.91082	0.000111859	0.000483914	0.142	0.069	0.179	0.209	0.021	1
229595	NM_144899	Adamtsl4	0.646208	0.161989	0.529462	0.617801	0.181306	0.762936	0.000822512	0.998586	0.999991	2.41956	1.41839e-07	1.09152e-06	0.332	0.53	0.572	0.315	2.494	1
66548	NR_104339	Adamtsl5	0.49822	0.34663	0.712795	0.61026	0.248647	0.82449	0.0405824	0.939156	0.999991	2.05995	8.94705e-05	0.000394491	0.137	0.188	0.236	0.144	0.866	1
231821	NM_172723	Adap1	1.15974	3.01764e-09	2.04916e-07	0.454249	0.0212907	0.275824	0.0214428	0.914229	0.999991	2.82148	4.57168e-48	5.14081e-46	2.453	5.131	3.402	2.431	18.088	1
216991	NM_172133	Adap2	-0.315138	0.518683	0.821333	-0.69051	0.165813	0.744708	0.210961	0.658942	0.999991	3.36523	5.292e-14	8.12981e-13	0.102	0.066	0.043	0.121	1.721	1
56417	NM_001146296	Adar	0.0776304	0.561069	0.844884	-0.0635213	0.634523	0.947963	0.0280396	0.833783	0.999991	0.511248	0.000126798	0.000540058	13.865	13.405	13.356	13.714	19.614	1
110532	NM_130895	Adarb1	0.871819	0.127882	0.478028	0.422203	0.461085	0.917352	0.267691	0.640342	0.999991	1.2736	0.0261048	0.0593797	0.27	0.622	0.432	0.358	1.008	1
30947	NM_013925	Adat1	0.0152171	0.915979	0.976133	0.167019	0.244841	0.822246	0.0570358	0.69279	0.999991	-0.439756	0.00271922	0.00832076	2.589	2.393	2.923	2.605	1.873	1
66757	NM_025748	Adat2	-0.0271671	0.847636	0.956966	-0.0127057	0.928362	0.990429	0.0880278	0.532907	0.999991	-0.288829	0.0435265	0.0920302	4.84	4.339	4.819	5	3.895	0
72113	NM_028105	Adck1	0.494765	0.00084332	0.0144135	0.270746	0.0682587	0.521911	0.102084	0.492804	0.999991	0.392689	0.0081279	0.0216456	9.708	12.707	11.835	10.15	12.636	1
57869	NM_178873	Adck2	0.0626077	0.597459	0.856901	-0.0931639	0.433572	0.910095	0.121172	0.306914	0.999991	0.528175	7.11276e-06	3.99368e-05	4.88	4.662	4.588	5.143	6.979	1
67426	NM_023341	Adck3	-0.579487	0.0125524	0.114026	0.407395	0.0743094	0.54112	0.294138	0.198628	0.999991	0.658843	0.0038086	0.0111823	1.396	0.833	1.876	1.667	2.21	1
76889	NM_133770	Adck4	0.285516	0.0606186	0.322261	0.422968	0.00537184	0.106603	0.171592	0.260608	0.999991	0.325471	0.0324227	0.0716507	7.021	7.845	9.452	7.69	8.716	1
11512	NM_007405	Adcy6	-0.368648	0.193683	0.56895	0.199064	0.482637	0.9209	0.222235	0.433174	0.999991	-1.07194	0.000158725	0.00066122	17.465	12.199	20.313	19.843	7.89	1
11513	NM_001037723	Adcy7	0.419945	0.0651223	0.336412	-0.478758	0.035585	0.368807	-0.0421212	0.853269	0.999991	1.40952	5.92277e-10	6.18468e-09	27.419	34.136	19.665	25.699	75.028	1
11515	NM_009624	Adcy9	0.906276	0.0702448	0.350715	2.20709	8.57399e-06	0.000596334	0.390189	0.439156	0.999991	1.97248	7.12505e-05	0.000321181	0.036	0.082	0.281	0.052	0.227	1
215772	NM_001127353	Adgb	0.279527	0.625983	0.872267	-0.283251	0.626463	0.947856	-0.592367	0.313486	0.999991	1.49355	0.0076187	0.0204709	0.01	0.015	0.006	0.001	0.059	1
78560	NM_054044	Adgra2	0.793792	0.0461083	0.271679	0.7215	0.0700368	0.527236	0.217691	0.586853	0.999991	2.62385	2.966e-11	3.5272e-10	0.238	0.414	0.433	0.275	1.882	1
70693	NM_133911	Adgra3	0.261709	0.345198	0.711395	-0.0857155	0.757307	0.971704	-0.153933	0.57901	0.999991	-0.807558	0.00364773	0.0107808	9.066	10.027	8.571	7.849	4.964	1
243277	NM_001081342	Adgrd1	0.348656	0.535439	0.829242	-0.0943865	0.867003	0.982382	-0.190931	0.735002	0.999991	1.6847	0.00266606	0.00818537	0.121	0.161	0.11	0.093	0.629	1
13733	NM_010130	Adgre1	3.10511	2.86845e-10	2.39983e-08	-0.355301	0.472449	0.919293	-1.04257	0.0355767	0.999991	5.17331	7.8417e-26	2.84262e-24	0.777	10.663	0.557	0.259	61.806	1
52614	NM_139138	Adgre4	2.60887	9.05699e-08	4.74568e-06	0.22134	0.684336	0.955565	0.49281	0.35954	0.999991	6.53648	3.17203e-44	3.06629e-42	0	0.108	0.004	0.009	2.286	1
26364	NM_011925	Adgre5	-0.188465	0.420843	0.763579	0.713213	0.00224191	0.0549832	0.187248	0.423237	0.999991	0.849832	0.000269905	0.00107145	6.622	5.275	11.168	7.373	11.942	1
381628	NM_001014394	Adgrf3	0.768278	0.129741	0.481575	-0.416776	0.436008	0.910095	-0.553627	0.30592	0.999991	1.56717	0.00154377	0.00505318	0.027	0.058	0.015	0.01	0.128	1
224792	NM_001081178	Adgrf5	0.341434	0.524373	0.825065	0.435376	0.416775	0.907426	-0.141422	0.792483	0.999991	2.0834	9.69408e-05	0.000424261	0.115	0.147	0.179	0.096	0.785	1
14766	NM_001198894	Adgrg1	-0.573959	0.000387612	0.00760313	-0.14856	0.35822	0.891121	0.179846	0.265951	0.999991	-2.52372	1.87614e-54	2.62819e-52	85.782	52.232	77.431	94.561	14.285	1
54672	NM_173036	Adgrg3	-0.709496	0.03805	0.238786	-0.0840435	0.805791	0.979392	0.0270222	0.936991	0.999991	-1.46465	1.89461e-05	9.72304e-05	19.27	10.283	18.125	18.888	6.243	1
382045	NM_001145972	Adgrg5	0.446535	0.227049	0.607994	-1.1367	0.00211823	0.0530097	-0.486433	0.188339	0.999991	1.25444	0.000688688	0.00247263	30.725	39.607	12.846	20.369	79.383	1
215798	NM_001002268	Adgrg6	0.761186	0.140729	0.498529	0.692616	0.180311	0.762605	0.232749	0.653855	0.999991	2.24665	1.22573e-05	6.56131e-05	0.076	0.146	0.15	0.091	0.587	1
330814	NM_181039	Adgrl1	-0.104717	0.6014	0.857577	0.0822609	0.681471	0.955565	0.210148	0.294344	0.999991	-0.739775	0.000227495	0.000917193	12.22	10.377	13.054	13.715	7.128	1
99633	NM_001081298	Adgrl2	0.23253	0.485464	0.803693	-0.0318723	0.924189	0.990324	0.631888	0.0568167	0.999991	0.829634	0.0121317	0.0306163	0.289	0.316	0.284	0.449	0.538	1
170757	NM_133222	Adgrl4	0.654453	0.281948	0.656591	0.506141	0.405792	0.905371	0.542788	0.372752	0.999991	1.66763	0.00579319	0.0161106	0	0.012	0.009	0.009	0.052	0
11532	NM_007410	Adh5	0.120835	0.314089	0.687233	0.122085	0.309112	0.867492	0.0365445	0.760909	0.999991	-0.377805	0.00168335	0.00544641	65.342	64.977	71.184	65.309	49.553	1
11529	NM_009626	Adh7	0.6673	0.228217	0.609473	0.549319	0.321914	0.872945	-0.055073	0.921662	0.999991	2.14802	8.75994e-05	0.000386964	0.071	0.141	0.136	0.063	0.622	0
104923	NM_134052	Adi1	-0.0574504	0.706994	0.907607	0.17226	0.258834	0.831258	0.0656074	0.667597	0.999991	-0.559168	0.000274038	0.00108629	15.921	13.963	17.981	16.214	10.609	0
11450	NM_009605	Adipoq	0.166523	0.772257	0.935302	1.2493	0.0273728	0.31768	0.204933	0.721859	0.999991	1.30754	0.0208976	0.0490468	0.056	0.068	0.266	0.075	0.279	1
72674	NM_028320	Adipor1	0.190175	0.237374	0.617995	0.189864	0.238142	0.816061	0.15672	0.330322	0.999991	0.461611	0.00411037	0.0119494	23.442	24.495	26.92	25.53	32.101	0
68465	NM_197985	Adipor2	0.154926	0.351426	0.715897	-0.045138	0.786075	0.977541	0.0667763	0.688019	0.999991	0.478366	0.00399884	0.0116745	30.848	31.452	30.052	31.437	42.799	1
11534	NM_134079	Adk	0.129752	0.568708	0.84656	0.247323	0.277117	0.846547	0.1042	0.647271	0.999991	-1.23134	8.01496e-08	6.38185e-07	13.976	14.012	16.758	14.708	5.696	1
11540	NM_009630	Adora2a	-1.21207	7.48627e-07	3.22793e-05	-0.49309	0.0427436	0.408777	0.381415	0.115447	0.999991	-1.84343	8.95934e-14	1.3488e-12	6.075	2.306	4.255	7.765	1.562	1
11541	NM_007413	Adora2b	2.37308	7.95152e-14	1.07066e-11	-1.64591	4.12182e-06	0.000322315	0.0256477	0.938081	0.999991	4.25794	1.59866e-41	1.30821e-39	0.594	3.261	0.145	0.591	14.114	1
11542	NM_009631	Adora3	3.32705	6.09408e-28	2.97686e-25	-1.00504	0.00161136	0.0429642	0.347004	0.26227	0.999991	5.1902	9.19647e-66	1.92427e-63	0.917	10.023	0.417	1.158	42.492	1
11544	NM_007414	Adprh	0.283636	0.0173044	0.142449	0.120179	0.31351	0.871381	0.0978615	0.41199	0.999991	0.284759	0.0168767	0.0407555	54.572	60.816	59.427	56.833	65.775	1
11548	NM_007416	Adra1b	0.618195	0.280978	0.656037	0.229173	0.689958	0.956024	-0.273633	0.635119	0.999991	1.97459	0.000545907	0.00201335	0.094	0.173	0.126	0.062	0.709	1
11550	NM_013460	Adra1d	0.496069	0.385603	0.737456	0.215693	0.706576	0.960472	0.193333	0.735987	0.999991	2.00095	0.000426245	0.00161342	0.084	0.139	0.111	0.099	0.672	1
11551	NM_007417	Adra2a	1.12664	0.0626041	0.328829	0.458038	0.449455	0.91391	0.322001	0.595065	0.999991	1.80165	0.002889	0.0087753	0.041	0.186	0.088	0.071	0.423	1
320129	NM_001285806	Adrbk2	1.57793	1.52849e-06	6.12326e-05	0.567918	0.0839368	0.571386	-0.350634	0.287032	0.999991	3.46071	4.94939e-26	1.81405e-24	2.209	6.648	3.424	1.631	29.219	1
11564	NM_009634	Adsl	0.280969	0.019763	0.155952	0.017269	0.886197	0.9845	0.0305344	0.800273	0.999991	-0.724166	2.26995e-09	2.20331e-08	23.983	26.696	24.323	23.841	14.288	1
11566	NM_007422	Adss	0.0894972	0.584372	0.852512	-0.0778694	0.634217	0.947926	0.0717246	0.661158	0.999991	-0.497545	0.00238804	0.00743817	42.752	41.603	40.657	43.79	29.734	1
109254	NM_001145875	Adtrp	0.370461	0.542537	NA	0.127494	0.834333	NA	0.422418	0.487506	0.999991	1.42265	0.0180392	0.0431947	0	0.009	0.003	0.009	0.053	1
11568	NM_001291857	Aebp1	0.366585	0.511607	0.817395	0.375114	0.501833	0.925405	-0.0886059	0.873962	0.999991	2.09176	0.000179983	0.000740262	4.556	6.046	6.77	3.918	33.504	0
140497	NM_134158	AF251705	2.60199	4.61381e-08	2.60697e-06	0.0479935	0.925682	0.990324	0.0455172	0.929751	0.999991	7.08083	4.13357e-52	5.42284e-50	0.041	0.667	0.047	0.041	23.271	1
70292	NM_027373	Afap1	0.29527	0.390712	0.741422	-0.103962	0.762731	0.971704	0.157613	0.646998	0.999991	0.702828	0.0408942	0.0872235	1.73	1.978	1.607	1.88	2.92	1
106877	NM_178928	Afap1l1	-0.8824	0.00677613	0.072306	0.203283	0.528688	0.932015	0.444613	0.167799	0.999991	-1.30842	6.66728e-05	0.000302859	1.59	0.744	1.857	2.166	0.583	1
226250	NM_146102	Afap1l2	0.217413	0.695589	0.904225	-0.204809	0.713879	0.961996	0.129318	0.816305	0.999991	1.42589	0.009569	0.0249401	0.059	0.069	0.047	0.063	0.246	1
11576	NM_007423	Afp	0.930204	0.03542	0.228143	-0.362496	0.431735	0.910092	-0.443976	0.338847	0.999991	1.0963	0.0128992	0.0322381	0.141	0.292	0.099	0.089	0.361	1
216549	NM_001290545	Aftph	-0.0270719	0.830548	0.951648	0.0294351	0.815947	0.979392	0.0391634	0.75689	0.999991	0.386037	0.00222654	0.00698116	13.134	11.769	13.439	13.125	17.037	1
11593	NM_001005847	Aga	0.152778	0.437313	0.775436	0.12422	0.527801	0.931716	-0.0439014	0.823872	0.999991	0.668189	0.00064798	0.00234174	9.274	9.452	10.169	8.698	14.767	1
213990	NM_139153	Agap3	0.042945	0.784404	0.93848	0.335153	0.0325798	0.350324	0.150547	0.337461	0.999991	-0.350035	0.0260214	0.0592389	16.958	15.98	21.547	18.347	13.119	0
231093	NR_122117	Agbl5	-0.107196	0.405686	0.752671	-0.0847314	0.510955	0.928314	0.0770317	0.549853	0.999991	-0.709552	4.41743e-08	3.65283e-07	14.613	12.388	13.822	15.011	8.789	1
15463	NM_010472	Agfg1	-0.214154	0.368096	0.725792	-0.378151	0.112012	0.642105	-0.059562	0.80233	0.999991	-1.86567	4.72291e-15	7.99076e-14	44.094	34.495	33.774	41	11.291	1
231801	NM_178162	Agfg2	-0.103083	0.241195	0.622641	0.0570903	0.515502	0.929196	0.228841	0.00906938	0.999991	-0.199909	0.0232529	0.0536754	20.878	17.767	21.781	23.817	17.948	0
69923	NM_023538	Agk	0.0551681	0.741272	0.921012	-0.0696548	0.677076	0.954969	0.00730109	0.96518	0.999991	-0.441673	0.00851847	0.0225549	10.466	9.946	10.016	10.22	7.571	1
236511	NM_153403	Ago1	-0.15202	0.438968	0.777188	-0.23064	0.240361	0.819224	0.0812778	0.678977	0.999991	-0.531114	0.00688252	0.0187458	17.678	14.494	15.108	18.203	11.963	1
76850	NM_153177	Ago4	0.814337	0.0671477	0.342248	-0.463756	0.306823	0.865721	-0.341658	0.451025	0.999991	2.38189	6.36383e-08	5.14648e-07	0.104	0.191	0.069	0.075	0.733	1
55979	NM_001163379	Agpat1	0.352588	0.00274592	0.0364112	0.127059	0.281076	0.850315	0.143773	0.222734	0.999991	0.480907	4.37433e-05	0.00020683	28.377	32.931	31.326	30.218	39.044	1
28169	NM_053014	Agpat3	0.9269	1.73135e-06	6.84539e-05	0.436278	0.0245053	0.298854	0.248169	0.201034	0.999991	0.828182	1.93452e-05	9.91859e-05	13.534	23.956	18.543	15.73	24.128	1
228061	NM_172666	Agps	0.446355	0.0327659	0.217066	-0.340748	0.103467	0.621528	-0.136147	0.515236	0.999991	0.744641	0.000367401	0.00141289	12.189	15.313	9.625	10.783	20.483	1
11610	NM_009642	Agtrap	-0.629568	6.86634e-07	2.99645e-05	0.490357	9.6849e-05	0.00461973	0.198756	0.114796	0.999991	-0.777697	9.25798e-10	9.43492e-09	12.282	7.194	17.373	13.693	7.06	0
269378	NM_016661	Ahcy	0.262159	0.07859	0.373654	0.0469422	0.752845	0.971358	0.107512	0.470795	0.999991	-0.880521	3.666e-09	3.4847e-08	88.685	97.456	91.949	93.314	47.216	1
74340	NM_021414	Ahcyl2	-0.586913	0.000518803	0.0097836	-0.24528	0.146679	0.712256	-0.175231	0.299798	0.999991	-1.24036	2.42309e-13	3.48899e-12	27.713	16.196	23.516	23.493	10.765	1
52906	NM_026203	Ahi1	-0.294582	0.0338541	0.221162	-0.190065	0.170525	0.749254	0.102512	0.458838	0.999991	-1.47302	2.62098e-25	9.14026e-24	7.324	5.457	6.372	7.089	2.145	1
66395	NM_009643	Ahnak	0.46887	0.180682	0.552964	0.167341	0.632833	0.947856	0.300639	0.390724	0.999991	2.9461	3.99238e-17	7.9896e-16	6.36	8.31	7.295	7.688	58.607	1
11622	NM_013464	Ahr	0.077906	0.788043	0.939611	-0.870322	0.00268606	0.0639652	-0.153778	0.595696	0.999991	0.76814	0.00801311	0.0213985	18.445	17.829	9.813	15.98	31.99	1
11624	NM_009644	Ahrr	0.576459	0.327013	0.696024	0.0920166	0.87587	0.983322	0.375063	0.524008	0.999991	2.78166	2.08095e-06	1.31291e-05	0.055	0.107	0.064	0.089	1.07	0
217737	NM_146036	Ahsa1	0.27816	0.0402756	0.247522	0.100683	0.458024	0.916685	0.0608965	0.653612	0.999991	-0.411663	0.00244217	0.00759103	103.719	115.262	111.436	105.395	76.845	1
11625	NM_013465	Ahsg	-0.751627	0.149759	0.510301	-1.04968	0.0448961	0.416839	0.124296	0.810674	0.999991	-2.80831	2.02716e-07	1.52382e-06	0.865	0.396	0.328	0.942	0.025	0
106672	NM_001002895	AI413582	0.99102	1.24864e-06	5.13807e-05	0.466234	0.0234677	0.292839	0.158017	0.44545	0.999991	2.14438	3.83079e-26	1.40718e-24	8.729	16.249	12.198	9.461	40.001	1
329828	NM_001085515	AI464131	0.516316	0.365145	0.724451	0.427305	0.453992	0.915636	0.153352	0.788974	0.999991	1.71964	0.00234163	0.00730599	0.031	0.055	0.055	0.037	0.201	0
229694	NR_033498	AI504432	-0.387092	0.220588	0.601592	-0.136404	0.665835	0.952983	-0.00730924	0.981535	0.999991	-1.24482	8.53752e-05	0.000378656	4.428	3.03	4.038	4.269	1.718	1
226691	NM_001204910	AI607873	0.487008	0.269955	0.647502	-0.337188	0.447702	0.913082	-0.163244	0.712935	0.999991	2.41955	3.53044e-08	2.95934e-07	0.483	0.667	0.363	0.404	3.41	1
224833	NM_145489	AI661453	-0.752583	0.00241204	0.0331447	0.0309024	0.899332	0.987084	-0.242922	0.322814	0.999991	-0.928063	0.000197891	0.000806692	1.01	0.533	1.039	0.826	0.506	1
100043636	NR_015519	AI662270	0.0207967	0.872572	0.965102	0.112461	0.385663	0.900177	-0.0169901	0.895774	0.999991	-0.651081	5.39195e-07	3.73706e-06	102.576	95.084	111.059	98.782	64.132	1
11629	NM_019467	Aif1	0.214827	0.679881	0.898548	-0.303081	0.56746	0.93739	-0.373887	0.482924	0.999991	2.80009	1.86061e-08	1.62043e-07	0.142	0.168	0.097	0.08	1.823	1
26926	NM_012019	Aifm1	0.143315	0.232392	0.614045	-0.046693	0.697579	0.957964	-0.00538487	0.964263	0.999991	-0.488874	5.06408e-05	0.0002364	23.918	24.167	23.181	23.192	16.783	1
71361	NM_001039194	Aifm2	0.707097	0.0418278	0.253765	0.507139	0.145863	0.710325	0.393537	0.260927	0.999991	2.38585	2.77902e-12	3.63427e-11	0.589	0.981	0.874	0.762	2.932	1
72168	NM_175178	Aifm3	0.831909	0.163391	0.531863	0.449287	0.453179	0.915636	0.163406	0.785723	0.999991	1.93459	0.00109494	0.00372486	0.014	0.052	0.027	0.02	0.195	1
11630	NM_172393	Aim1	0.221288	0.509514	0.81641	0.0915378	0.785099	0.977411	-0.0929729	0.782107	0.999991	2.45492	1.91055e-13	2.7776e-12	0.853	0.922	0.919	0.767	5.374	1
383619	NM_001013779	Aim2	0.350233	0.149064	0.509506	-0.40476	0.096281	0.604585	-0.112083	0.644825	0.999991	0.811196	0.000822382	0.00289295	9.254	10.889	6.927	8.22	16.395	1
231872	NM_001172146	Aimp2	0.325944	0.0158977	0.134944	0.14916	0.270402	0.84043	0.13916	0.304123	0.999991	-0.497037	0.000261755	0.00104235	30.592	35.172	34.035	32.732	21.349	0
104103	NR_027784	Airn	-1.41993	0.000475179	0.00910839	-0.428428	0.279248	0.84857	-0.437857	0.269565	0.999991	-1.70968	3.20871e-05	0.000156138	1.214	0.354	0.829	0.822	0.298	1
16475	NM_010590	Ajuba	0.572584	0.19013	0.564133	0.759733	0.0818397	0.5665	0.286522	0.513011	0.999991	2.18055	5.26352e-07	3.66341e-06	0.45	0.665	0.855	0.553	2.662	0
100233175	NM_001142938	AK010878	0.0714155	0.632808	0.875226	-0.0847735	0.571681	0.937661	0.081418	0.586363	0.999991	-0.625663	3.76278e-05	0.000180025	11.327	10.877	10.68	11.684	7.182	1
11636	NM_021515	Ak1	0.412169	0.375411	0.730636	0.356639	0.443147	0.91142	-0.0792212	0.864879	0.999991	1.85061	6.71968e-05	0.000305071	2.209	2.868	3.005	1.968	10.309	1
11639	NM_001177602	Ak4	-0.0347084	0.93285	0.98035	-0.18238	0.658002	0.95142	-0.211213	0.608241	0.999991	-1.91755	3.59881e-06	2.16557e-05	3.264	2.911	2.857	2.723	0.69	0
229949	NM_001081277	Ak5	0.521703	0.309073	0.682369	0.263607	0.608386	0.94584	0.197299	0.701874	0.999991	1.73082	0.000659734	0.0023785	0.115	0.175	0.15	0.134	0.56	1
102216272	NM_027592	Ak6	0.18462	0.0465542	0.273456	-0.00530055	0.954587	0.995097	0.0731327	0.431979	0.999991	-0.547244	6.54114e-09	6.03376e-08	32.782	34.079	32.71	33.437	22.08	0
68870	NM_001033874	Ak8	2.91405	1.86907e-15	2.91786e-13	0.430378	0.268738	0.840019	0.163689	0.679036	0.999991	4.97477	7.20444e-43	6.47225e-41	0.178	1.726	0.264	0.197	8.649	1
11640	NM_001042541	Akap1	0.0461629	0.82725	0.951181	-0.05559	0.79277	0.978499	0.122056	0.563932	0.999991	-1.03178	1.20416e-06	7.93653e-06	9.921	9.375	9.597	10.503	4.698	0
56697	NM_019921	Akap10	0.128918	0.494001	0.808483	-0.09715	0.606649	0.945117	0.12204	0.517479	0.999991	0.48989	0.00925552	0.0242578	7.494	7.507	7.046	7.908	10.479	1
219181	NM_001164503	Akap11	-0.230226	0.333248	0.701664	-0.181977	0.444365	0.91174	0.0536884	0.821448	0.999991	-0.636341	0.00751386	0.0202254	11.192	8.657	9.902	11.329	6.982	1
238276	NM_001101471	Akap5	0.916309	0.0051027	0.0589869	0.0729008	0.827373	0.979392	0.117647	0.725119	0.999991	1.22584	0.000166331	0.000689951	0.143	0.265	0.151	0.15	0.36	1
238161	NM_198111	Akap6	-0.54018	0.153956	0.515787	-1.883	6.97295e-07	7.0626e-05	-0.661534	0.0808576	0.999991	-1.51402	6.55375e-05	0.000298193	5.215	3.135	1.219	3.025	1.588	1
432442	NM_018747	Akap7	0.438128	0.0688246	0.347288	1.08432	4.81666e-06	0.000361203	0.222126	0.360622	0.999991	1.69088	6.15957e-13	8.49897e-12	0.636	0.802	1.406	0.724	2.15	1
68050	NM_023423	Akirin1	0.352785	0.00931641	0.0913129	-0.0140538	0.917632	0.989513	0.100007	0.461688	0.999991	0.44485	0.00103956	0.00355553	24.302	28.441	24.184	25.378	32.793	1
100182	NM_001045514	Akna	0.0783794	0.736989	0.919748	-0.636826	0.00637631	0.120118	-0.17359	0.457055	0.999991	0.696329	0.0028433	0.0086524	40.869	39.478	26.036	35.084	66.608	1
58810	NM_021473	Akr1a1	0.312413	0.016845	0.140387	-0.0640709	0.624135	0.947856	-0.037198	0.776052	0.999991	0.258581	0.0479167	0.0995304	221.02	251.394	211.445	209.555	261.82	1
67861	NM_172398	Akr1b10	0.149379	0.358946	0.722037	0.0753101	0.644033	0.950527	-0.00901789	0.955969	0.999991	0.532749	0.00102191	0.00350387	10.652	10.813	11.245	10.273	15.306	1
14187	NM_008012	Akr1b8	0.387927	0.457565	0.788802	0.650939	0.212208	0.78772	0.00776134	0.988163	0.999991	2.18075	2.7841e-05	0.000137541	0.9	1.192	1.671	0.842	6.413	1
622402	NM_013777	Akr1c12	0.311779	0.025476	0.182749	-0.904283	1.02772e-10	2.71701e-08	-0.235008	0.0925302	0.999991	-1.40012	1.74541e-23	5.36275e-22	128.179	145.956	67.951	105.416	47.106	1
27384	NM_013778	Akr1c13	0.23669	0.0523297	0.293818	-0.744942	1.08114e-09	2.19009e-07	-0.226338	0.0637222	0.999991	-1.5718	1.11982e-37	7.43402e-36	207.729	224.043	123.489	172.137	67.912	1
105387	NM_134072	Akr1c14	0.438948	0.429419	0.770643	0.212684	0.702299	0.959008	-0.17582	0.753032	0.999991	1.74044	0.00161865	0.00526596	0.13	0.191	0.166	0.098	0.717	0
23797	NM_011785	Akt3	0.0463828	0.832335	0.951916	0.333974	0.126493	0.673854	-0.0669986	0.760181	0.999991	1.51288	3.29276e-12	4.27903e-11	2.173	2.053	2.786	2.001	6.356	1
17025	NM_008525	Alad	0.333034	0.0473339	0.275981	0.160544	0.339726	0.881999	0.110869	0.510173	0.999991	-0.635522	0.000181742	0.000746571	4.045	4.676	4.534	4.243	2.546	0
11655	NM_020559	Alas1	0.281466	0.00290351	0.0378707	-0.00112671	0.99056	0.996051	0.0720201	0.449435	0.999991	0.814894	3.02927e-18	6.52854e-17	7.656	8.522	7.666	7.81	13.354	1
11658	NM_009655	Alcam	2.03078	6.02016e-13	7.12213e-11	0.12364	0.665946	0.952983	-0.0583712	0.839115	0.999991	3.71093	7.87234e-40	5.83542e-38	0.648	2.657	0.715	0.6	9.768	1
69748	NM_145954	Aldh16a1	0.325127	0.00306254	0.0393476	0.159526	0.146789	0.712376	-0.117608	0.286464	0.999991	0.454403	3.44002e-05	0.000166025	17.054	19.577	19.078	15.293	23.17	0
56454	NM_019698	Aldh18a1	0.194404	0.36425	0.724348	-0.230521	0.282201	0.850598	0.0614205	0.774421	0.999991	-0.578383	0.00700034	0.0190259	29.968	31.458	25.577	30.465	19.598	1
19378	NM_009022	Aldh1a2	0.449994	0.404141	0.75115	-0.123453	0.823979	0.979392	-0.0779683	0.888399	0.999991	5.496	2.18119e-29	9.46325e-28	0.01	0.025	0.007	0.007	2.172	1
56847	NM_053080	Aldh1a3	0.658131	0.276818	NA	0.566718	0.349565	0.888794	0.27973	0.645546	0.999991	1.2413	0.0389326	0.0836656	0	0.012	0.011	0.005	0.031	1
26358	NM_011921	Aldh1a7	0.940993	0.108245	0.439334	0.0636088	0.914532	0.989044	0.293728	0.619369	0.999991	2.11111	0.00027335	0.00108409	0.019	0.078	0.022	0.034	0.276	1
72535	NM_028270	Aldh1b1	0.611752	0.00344077	0.0433424	0.988883	2.21376e-06	0.000199597	0.952217	5.20552e-06	0.00465977	-0.503379	0.0165664	0.0401117	11.911	16.829	24.127	22.845	8.206	0
216188	NM_153543	Aldh1l2	0.390402	0.473103	0.796399	0.226418	0.677576	0.954969	-0.186265	0.733025	0.999991	1.69413	0.00177779	0.00571456	0.112	0.151	0.142	0.083	0.548	1
11669	NM_009656	Aldh2	0.18975	0.347265	0.713421	0.23956	0.23535	0.812527	0.130251	0.518862	0.999991	0.671373	0.000878457	0.00307063	28.474	29.774	33.843	30.433	45.56	0
11670	NM_001112725	Aldh3a1	0.655082	0.183827	0.55763	0.540586	0.27285	0.841618	-0.0178116	0.971225	0.999991	2.12104	1.62779e-05	8.4508e-05	1.582	2.595	2.58	1.487	9.883	1
11671	NM_007437	Aldh3a2	0.438421	0.0229278	0.170278	0.0231183	0.904795	0.987533	-0.00621425	0.974373	0.999991	1.37269	8.67391e-13	1.18203e-11	5.232	6.532	5.355	5.065	13.735	1
212647	NM_175438	Aldh4a1	0.385165	0.00105575	0.0173774	0.0892714	0.449536	0.91391	0.164353	0.163848	0.999991	0.381996	0.00116581	0.00393443	7.416	8.876	7.925	8.079	9.567	1
214579	NM_172532	Aldh5a1	0.737522	0.0989247	0.420909	0.437105	0.329489	0.877026	0.159247	0.723481	0.999991	1.2923	0.00370181	0.0109172	0.148	0.252	0.216	0.166	0.434	0
110695	NM_001127338	Aldh7a1	-0.381097	0.140067	0.49778	-0.12265	0.634559	0.947963	0.203901	0.429054	0.999991	-0.607608	0.0187736	0.0446836	7.513	5.228	6.97	8.608	4.573	1
56752	NM_019993	Aldh9a1	0.17637	0.207216	0.584878	-0.194413	0.164814	0.744708	0.0369685	0.791592	0.999991	-0.662862	2.26078e-06	1.41771e-05	40.006	41.383	35.047	39.984	24.824	1
208211	NM_145362	Alg1	0.328517	0.0262852	0.186284	0.262633	0.0759017	0.547161	0.0424005	0.775287	0.999991	0.574296	9.88884e-05	0.000431984	9.45	10.89	11.356	9.409	13.992	0
56737	NM_019998	Alg2	-0.265825	0.085272	0.391058	-0.253903	0.100218	0.614463	0.00398196	0.979414	0.999991	-0.963947	5.31324e-10	5.57283e-09	16.08	12.187	13.536	15.617	8.058	1
381903	NM_199035	Alg8	0.104937	0.5142	0.81818	-0.00715686	0.964542	0.995097	0.0301936	0.851268	0.999991	-0.341313	0.034514	0.0755851	14.178	13.966	14.139	14.042	11.029	1
211064	NM_001102565	Alkbh1	-0.0344665	0.804017	0.944142	-0.00477498	0.972566	0.995097	0.012889	0.926087	0.999991	-0.422367	0.00249492	0.00773609	12.093	10.804	12.099	11.753	8.872	1
231642	NM_175016	Alkbh2	0.0972502	0.561457	0.844891	-0.147862	0.383253	0.900177	-0.115257	0.497604	0.999991	-0.511351	0.00323304	0.00970524	3.345	3.281	3.015	2.981	2.294	1
67667	NM_026303	Alkbh8	-0.086811	0.716427	0.910305	-0.153022	0.522152	0.929885	0.156839	0.51128	0.999991	-0.783709	0.00110604	0.00375458	6.838	5.868	6.175	7.437	3.826	1
236266	NM_145223	Alms1	-0.289327	0.187411	0.561221	-0.189049	0.388871	0.900344	0.0870707	0.691288	0.999991	-1.44239	6.56411e-11	7.49342e-10	3.479	2.586	3.063	3.611	1.22	1
623273	NR_040440	Alms1-ps2	-0.204632	0.48498	0.803419	0.365486	0.208185	0.784934	0.123916	0.671006	0.999991	-1.37472	5.7344e-06	3.29245e-05	2.565	2.017	3.349	2.743	0.898	0
11686	NM_009659	Alox12b	0.221115	0.715134	NA	0.219002	0.717747	0.962106	0.251438	0.678261	0.999991	1.67935	0.00480882	0.0137004	0.003	0.009	0.01	0.01	0.088	1
11687	NM_009660	Alox15	3.35117	4.00113e-21	1.18802e-18	-0.724112	0.0763554	0.547348	0.112145	0.772467	0.999991	3.77419	1.68791e-26	6.29079e-25	0.125	1.605	0.06	0.134	2.366	1
11690	NM_009663	Alox5ap	2.08446	2.50245e-17	5.05261e-15	-1.58034	2.39728e-10	5.66557e-08	-0.997658	5.92917e-05	0.0341953	3.6693	2.53797e-50	3.1308e-48	21.301	87.96	6.726	10.035	298.061	1
71481	NM_027808	Alpk1	0.786609	0.0431814	0.259277	0.275075	0.483302	0.921147	0.0529232	0.893385	0.999991	2.12663	3.09858e-08	2.62934e-07	0.171	0.295	0.215	0.172	0.904	1
225638	NM_001037294	Alpk2	0.556592	0.272565	0.649453	-0.433157	0.410247	0.905851	0.0780304	0.87997	0.999991	1.15604	0.0207206	0.0486728	0.018	0.03	0.011	0.019	0.056	1
116904	NM_054085	Alpk3	-0.326222	0.119213	0.461255	-0.42256	0.0442166	0.415042	0.320101	0.120764	0.999991	-2.02362	1.08498e-18	2.41059e-17	0.713	0.515	0.528	0.868	0.159	1
11647	NM_007431	Alpl	0.742688	0.168209	0.536476	0.409782	0.447139	0.912661	0.0282598	0.958201	0.999991	2.18386	5.04748e-05	0.000235825	2.344	4.391	3.522	2.271	17.586	1
74018	NM_001159948	Als2	0.0480991	0.810026	0.946253	-0.273541	0.171748	0.7504	-0.0345754	0.862829	0.999991	-1.14478	1.12888e-08	1.00486e-07	17.733	16.753	14.693	16.817	7.73	0
235633	NM_001146060	Als2cl	0.263648	0.454679	0.78661	0.543262	0.12304	0.668705	0.145159	0.680859	0.999991	1.43528	4.4413e-05	0.000209457	1.156	1.292	1.736	1.227	3.397	1
108812	NM_175370	Als2cr12	2.12584	1.21666e-05	0.000389511	-0.320924	0.552465	0.93664	0.0291197	0.95632	0.999991	4.30593	6.44909e-20	1.5654e-18	0.025	0.258	0.01	0.025	1.535	1
21681	NM_011568	Alyref	0.219486	0.153747	0.51548	0.114403	0.457237	0.916685	0.0203176	0.894987	0.999991	-0.557347	0.000297199	0.00116847	145.753	155.559	157.802	143.491	97.142	1
56009	NM_019484	Alyref2	0.367916	0.133113	0.487008	0.189964	0.43912	0.910218	-0.0336451	0.891495	0.999991	1.2551	2.40342e-07	1.78957e-06	3.742	4.478	4.279	3.547	9.199	1
17117	NM_008537	Amacr	0.532671	0.0510498	0.289639	0.05476	0.842351	0.979392	0.201142	0.464388	0.999991	2.59309	4.51191e-22	1.28368e-20	1.017	1.38	1.063	1.143	6.729	0
228361	NM_172669	Ambra1	0.205254	0.170867	0.539724	-0.0133531	0.929063	0.990429	0.0969761	0.517878	0.999991	0.350786	0.0192209	0.045617	12.578	13.285	12.56	13.047	15.843	1
11702	NM_009665	Amd1	0.302991	0.0839312	0.38766	0.0414666	0.813105	0.979392	0.0132904	0.93961	0.999991	-0.450438	0.0103163	0.0266243	25.407	28.758	26.272	25.039	18.26	0
100041585	NM_007444	Amd2	0.303948	0.0831078	0.385452	0.041351	0.813706	0.979392	0.0134495	0.938918	0.999991	-0.451197	0.0102258	0.0264567	25.423	28.796	26.286	25.057	18.262	0
71761	NM_027908	Amdhd1	0.0502083	0.925469	0.97851	0.533671	0.311704	0.869672	-0.450795	0.411918	0.999991	1.50014	0.00353954	0.0104892	0.035	0.035	0.066	0.016	0.161	0
72345	NM_175179	Amer1	-0.356204	0.154418	0.516242	-0.294832	0.238414	0.816061	-0.0362492	0.884687	0.999991	-0.778124	0.00189852	0.00605488	3.454	2.439	2.815	3.261	1.94	0
23802	NM_011787	Amfr	0.31965	0.0172384	0.142125	-0.0122391	0.927412	0.990415	0.114765	0.392884	0.999991	0.761126	1.378e-08	1.21355e-07	24.601	28.129	24.521	25.91	41.481	1
270152	NM_001005421	Amica1	1.83954	4.94564e-06	0.000174167	-0.669354	0.1017	0.617138	0.319149	0.431233	0.999991	3.53857	1.30096e-18	2.87883e-17	0.857	3.393	0.494	1.078	13.74	1
27494	NM_153319	Amot	0.236791	0.519724	0.821861	-0.4802	0.19395	0.774904	-0.180602	0.624521	0.999991	0.837182	0.02249	0.0521401	0.578	0.634	0.401	0.492	1.091	1
75723	NM_001081395	Amotl1	0.455147	0.350304	0.715781	0.311894	0.522294	0.929885	-0.0179026	0.970738	0.999991	2.0229	3.18096e-05	0.00015497	0.29	0.396	0.387	0.272	1.631	1
56332	NM_019764	Amotl2	0.600238	0.252328	0.632673	0.435931	0.405841	0.905371	0.111691	0.831423	0.999991	2.32479	9.09983e-06	5.0207e-05	0.886	1.422	1.355	0.926	7.149	0
109674	NM_028779	Ampd2	0.0888946	0.552325	0.839407	-0.0436584	0.770463	0.975133	0.118435	0.428547	0.999991	-0.537471	0.000335632	0.00130511	25.168	24.552	24.644	26.531	17.118	1
11717	NM_009667	Ampd3	2.44538	9.36719e-21	2.6268e-18	0.226361	0.40818	0.905679	-0.314697	0.263097	0.999991	4.91491	2.45409e-80	8.27879e-78	0.317	1.747	0.376	0.238	11.188	1
231842	NM_173405	Amz1	2.9058	6.3375e-21	1.84555e-18	-0.617125	0.0615943	0.496254	-0.705109	0.0339839	0.999991	5.47525	9.67044e-71	2.45927e-68	0.415	3.373	0.253	0.226	24.012	1
13929	NM_001252193	Amz2	-0.155703	0.220579	0.601592	0.154813	0.222166	0.797365	-0.0530946	0.676078	0.999991	-0.578964	5.7507e-06	3.29971e-05	14.723	12.063	16.437	13.769	9.701	1
17222	NM_008569	Anapc1	0.00275745	0.989765	0.995948	-0.185573	0.388042	0.900177	0.0987883	0.645831	0.999991	-0.429409	0.0458278	0.0959904	20.862	19.097	18.41	21.84	15.159	1
59008	NM_001289519	Anapc5	0.15226	0.200051	0.576778	0.0558786	0.638196	0.948408	0.0877911	0.460066	0.999991	-0.517238	1.36587e-05	7.22491e-05	128.207	130.353	133.699	132.859	88.239	0
56317	NM_019805	Anapc7	-0.0120271	0.924357	0.97851	0.0359387	0.776564	0.976397	0.0994067	0.432485	0.999991	-0.493531	0.000104131	0.000453329	18.482	16.753	18.994	19.256	12.942	0
11727	NM_001161731	Ang	0.691987	0.085703	0.392559	0.332688	0.41035	0.905851	-0.20402	0.616562	0.999991	1.22397	0.00227982	0.00713198	1.633	2.602	2.146	1.336	4.29	1
26360	NM_011923	Angptl2	-0.365036	0.336766	0.704851	-0.393296	0.300702	0.863943	0.0754135	0.842678	0.999991	-0.823381	0.030292	0.0675928	26.025	17.909	19.307	26.714	13.663	1
654812	NM_001039554	Angptl7	0.98556	0.0494691	0.283432	0.00967594	0.984903	0.995097	0.165793	0.745248	0.999991	3.22404	6.08678e-11	6.99683e-10	0.094	0.233	0.096	0.104	1.664	1
11732	NM_020332	Ank	0.991041	0.0335267	0.220162	0.173766	0.709502	0.961178	0.493144	0.290322	0.999991	2.13102	4.81789e-06	2.81911e-05	3.024	6.404	3.567	4.414	17.9	1
11733	NM_001277284	Ank1	1.54576	0.000757281	0.0133498	0.343996	0.456843	0.916685	0.153435	0.740609	0.999991	3.16793	4.23221e-12	5.42735e-11	0.106	0.366	0.145	0.119	1.479	1
11735	NM_146005	Ank3	0.72402	0.165547	0.533981	0.408019	0.434851	0.910095	0.242103	0.643305	0.999991	1.84044	0.000415519	0.00157608	0.169	0.304	0.247	0.203	0.884	1
11736	NM_009671	Ankfy1	0.081348	0.658966	0.888873	-0.155157	0.400102	0.905071	0.000747564	0.996765	0.999991	0.484227	0.00857705	0.0226894	10.95	10.599	9.88	10.64	15.244	1
68558	NM_001271388	Ankra2	-0.0296583	0.849654	0.958313	0.250183	0.108335	0.631956	0.0241827	0.877204	0.999991	0.358534	0.0212419	0.0497067	6.491	5.744	7.235	6.526	8.211	0
107765	NM_013468	Ankrd1	0.458114	0.44827	0.782405	0.0741	0.902702	0.987533	0.126576	0.83461	0.999991	1.58887	0.00798614	0.0213437	0.013	0.036	0.017	0.017	0.161	1
102334	NM_133971	Ankrd10	-0.116068	0.250909	0.63262	0.0398688	0.69301	0.956791	0.0482027	0.633289	0.999991	-0.809744	1.72295e-15	3.03952e-14	36.559	30.844	37.704	36.549	20.522	1
106585	NM_001025572	Ankrd12	-0.574035	5.30493e-05	0.00138984	-0.237405	0.0938264	0.595889	0.0695731	0.622927	0.999991	-0.959199	1.71692e-11	2.07461e-10	5.373	3.282	4.562	5.446	2.702	1
268445	NM_172945	Ankrd13b	0.0290971	0.903196	0.974222	-0.00136387	0.995452	0.998119	0.118061	0.621651	0.999991	-1.10104	4.64251e-06	2.7242e-05	8.865	8.278	8.903	9.343	3.962	0
232339	NM_001081112	Ankrd26	-0.185539	0.410626	0.756177	-0.00337283	0.988059	0.995097	0.101092	0.653699	0.999991	-0.774553	0.00061422	0.0022366	5.126	4.105	5.148	5.334	2.904	1
245886	NM_145633	Ankrd27	0.0329032	0.812541	0.946294	-0.0566869	0.682945	0.955565	0.0518288	0.708785	0.999991	-0.361886	0.00920896	0.0241511	19.292	18.041	18.64	19.45	14.796	0
76389	NM_023816	Ankrd36	-1.19612	0.0376456	0.237066	0.158375	0.772809	0.975766	-0.409414	0.465263	0.999991	-1.32396	0.0220719	0.0513293	0.024	0.002	0.029	0.014	0	1
73845	NM_028665	Ankrd42	0.391254	0.482789	0.801719	0.409772	0.462209	0.918082	0.438366	0.431824	0.999991	1.52787	0.00558578	0.0156094	0.053	0.078	0.088	0.086	0.264	1
329154	NM_001081433	Ankrd44	0.0598468	0.765794	0.932038	-0.376813	0.0608622	0.49363	-0.239451	0.233541	0.999991	0.466005	0.0203225	0.0478535	17.36	16.548	13.36	14.228	23.872	1
68839	NM_175134	Ankrd46	-0.134635	0.338093	0.705585	0.0717893	0.608997	0.945926	0.204707	0.144535	0.999991	-0.355292	0.0116381	0.0295466	15.868	13.195	16.758	17.761	12.232	1
56503	NM_019683	Ankrd49	0.0880784	0.592434	0.854454	-0.278366	0.0917946	0.591169	0.0123708	0.940144	0.999991	-0.509706	0.00208368	0.00658947	12.144	11.818	10.033	11.915	8.369	0
223690	NM_144849	Ankrd54	-0.0736878	0.583376	0.852467	0.177822	0.184751	0.765812	0.00738704	0.95615	0.999991	-0.307745	0.0223298	0.0518198	18.15	15.754	20.59	17.694	14.453	1
224650	NM_001286040	Anks1	-0.167433	0.250207	0.631901	-0.177824	0.222016	0.797361	0.121797	0.40272	0.999991	-1.1341	8.04333e-15	1.3349e-13	23.494	18.968	20.859	24.895	10.437	1
72615	NM_028301	Anks3	1.19892	1.28387e-18	3.03777e-16	0.0628414	0.646915	0.950527	0.128055	0.350646	0.999991	0.39205	0.00416549	0.0120927	10.903	23.163	11.405	11.495	14.184	0
75691	NM_001024136	Anks6	0.863391	0.0453417	0.267997	0.579647	0.181379	0.762936	0.704405	0.103963	0.999991	2.40057	1.51951e-08	1.3332e-07	0.115	0.224	0.196	0.208	0.834	0
105722	NM_001253813	Ano6	-0.223077	0.376395	0.730636	-0.140474	0.577493	0.939271	0.234736	0.351838	0.999991	-0.937113	0.000204705	0.000831462	19.43	15.126	17.714	22.488	9.778	1
11737	NM_009672	Anp32a	0.114729	0.511108	0.816855	0.135057	0.439193	0.910218	0.0994328	0.569033	0.999991	-0.421827	0.0157321	0.0383443	126.455	125.289	139.163	132.74	92.843	1
67628	NM_130889	Anp32b	0.174635	0.208956	0.586074	0.188549	0.174921	0.754167	0.10929	0.431723	0.999991	-0.711361	3.14388e-07	2.28633e-06	334.695	345.787	381.769	352.788	200.72	1
66471	NM_023210	Anp32e	0.0274095	0.872588	0.965102	-0.0839989	0.623102	0.947856	0.0959161	0.574661	0.999991	-1.42512	7.90421e-17	1.55915e-15	198.971	185.321	188.28	208.166	71.81	1
16790	NM_008486	Anpep	3.67397	1.5746e-49	1.70316e-46	0.285133	0.272398	0.841354	-0.270068	0.310466	0.999991	5.86002	4.39887e-124	3.16145e-121	0.453	6.042	0.565	0.351	31.419	1
71914	NM_133738	Antxr2	0.862164	0.00139639	0.0214457	-1.50361	4.11913e-08	5.84092e-06	-0.967165	0.000389218	0.15045	1.37073	3.65937e-07	2.62427e-06	3.339	5.726	1.108	1.603	8.973	1
16952	NM_010730	Anxa1	0.476386	0.224866	0.605044	-0.119296	0.761307	0.971704	0.0251786	0.948876	0.999991	2.37757	1.34408e-09	1.34245e-08	14.265	18.947	13.077	13.863	90.259	1
11744	NM_013469	Anxa11	0.187953	0.14709	0.507998	-0.0225194	0.862178	0.9816	0.080007	0.537342	0.999991	0.522476	5.49166e-05	0.000254406	39.759	41.448	39.234	40.843	56.645	1
11745	NM_013470	Anxa3	0.613546	0.243721	0.625473	0.598457	0.255528	0.831258	0.153266	0.771231	0.999991	2.69237	2.91478e-07	2.13759e-06	0.803	1.328	1.451	0.867	9.118	1
11746	NM_013471	Anxa4	0.900451	0.0018589	0.0268858	0.280539	0.333933	0.880103	-0.295109	0.312077	0.999991	3.0257	7.92131e-26	2.86519e-24	2.995	5.324	3.713	2.293	27.425	1
11747	NM_009673	Anxa5	-0.0298227	0.912637	0.976118	0.238504	0.380035	0.899865	0.053491	0.843994	0.999991	1.35766	5.63894e-07	3.89518e-06	18.028	16.117	21.522	18.221	48.241	0
11749	NM_013472	Anxa6	0.553398	0.00709987	0.07487	-0.329993	0.108506	0.631956	-0.0709414	0.730057	0.999991	1.0277	5.73855e-07	3.96233e-06	154.297	209.115	122.436	142.288	317.36	1
11752	NM_013473	Anxa8	0.810948	0.169045	0.537241	0.534695	0.364693	0.893836	0.268327	0.649362	0.999991	2.61933	8.68538e-06	4.80486e-05	0.268	0.673	0.542	0.353	4.5	0
27052	NM_012054	Aoah	-0.0863008	0.847492	0.956966	0.186048	0.676564	0.954969	-0.863289	0.0609051	0.999991	2.53903	5.17242e-09	4.83324e-08	0.158	0.157	0.188	0.074	1.451	1
76507	NM_001161621	Aoc1	-0.010786	0.985921	NA	-0.0106192	0.986138	NA	0.164821	0.78739	0.999991	1.29563	0.032642	0.0720486	0	0	0	0.003	0.04	1
11761	NM_009676	Aox1	0.25221	0.639296	0.877526	0.0875208	0.870909	0.982948	-0.0731064	0.892169	0.999991	1.43784	0.00731073	0.0197558	0.174	0.204	0.191	0.153	0.666	1
11764	NM_001243044	Ap1b1	0.267694	0.0492647	0.282582	-0.0328753	0.809324	0.979392	0.0122828	0.928171	0.999991	0.284931	0.0363618	0.0790869	25.524	28.139	25.029	25.093	30.8	1
108012	NM_001290379	Ap1s2	0.44678	0.00673748	0.0721029	-0.308521	0.0673134	0.517941	-0.0850117	0.612247	0.999991	2.0957	1.11675e-38	7.69163e-37	2.645	3.32	2.139	2.427	11.52	1
252903	NM_183027	Ap1s3	1.10666	1.57525e-05	0.000486816	-0.338531	0.189046	0.771921	-0.345052	0.180884	0.999991	1.86729	2.97965e-13	4.2387e-12	4.792	9.774	3.762	3.645	18.343	1
232910	NM_198613	Ap2s1	0.30227	0.0891961	0.400444	0.31819	0.0735785	0.539829	0.151285	0.395182	0.999991	0.393357	0.0269588	0.0610953	80.767	91.426	100.989	87.406	105.437	0
11776	NM_007460	Ap3d1	0.105064	0.491816	0.807174	-0.0131095	0.931665	0.990705	0.0513415	0.737005	0.999991	0.537414	0.000433232	0.0016365	19.741	19.434	19.676	19.887	28.509	1
64933	NM_001122820	Ap3m2	0.00740919	0.965897	0.990896	-0.601685	0.000589658	0.0201258	0.0813471	0.638764	0.999991	0.601227	0.000479241	0.00179309	3.533	3.241	2.314	3.598	5.332	1
11777	NM_009681	Ap3s1	-0.411236	0.0610529	0.32339	-0.0473195	0.82924	0.979392	0.0566295	0.796312	0.999991	-0.943928	1.76013e-05	9.07518e-05	42.151	28.637	40.867	42.873	21.16	0
11781	NM_021392	Ap4m1	0.139332	0.410894	0.756177	-0.0959713	0.572064	0.937661	0.0303366	0.858166	0.999991	0.349048	0.0390684	0.0839139	9.705	9.805	9.118	9.592	12.296	0
381201	NM_001033448	Ap5b1	0.16914	0.430815	0.771349	0.101516	0.636548	0.948019	0.032305	0.880636	0.999991	1.32048	5.87294e-10	6.13652e-09	3.325	3.432	3.609	3.315	8.467	1
231855	NM_172725	Ap5z1	0.0917473	0.550882	0.838646	0.209892	0.171992	0.751257	0.139608	0.364209	0.999991	0.476705	0.00188586	0.00601918	6.09	5.944	7.083	6.477	8.426	1
319924	NM_177034	Apba1	1.02377	0.0855557	0.392122	0.425037	0.475586	0.920236	0.181466	0.760769	0.999991	1.31238	0.0274951	0.0621658	0.093	0.289	0.162	0.117	0.427	1
54519	NM_019456	Apbb1ip	0.762233	5.7613e-07	2.56598e-05	-0.361235	0.0181493	0.250303	-0.227984	0.135861	0.999991	0.951594	4.30534e-10	4.56493e-09	31.424	49.107	24.472	26.032	60.64	1
11787	NM_009686	Apbb2	0.514429	0.266534	0.644748	0.404452	0.382602	0.900177	0.175453	0.705304	0.999991	1.81081	8.65343e-05	0.00038318	0.252	0.356	0.356	0.282	1.139	1
23805	NM_011789	Apc2	0.635402	0.242619	0.624459	0.482031	0.375556	0.898042	0.246197	0.651118	0.999991	1.22124	0.0245729	0.0562513	0.124	0.214	0.203	0.156	0.402	0
494504	NM_133237	Apcdd1	0.509971	0.0258065	0.184421	-1.64796	4.76037e-12	1.81103e-09	-0.390499	0.0916578	0.999991	0.7799	0.000636356	0.00230527	2.61	3.445	0.787	1.907	4.495	1
11792	NM_009687	Apex1	0.305679	0.0266766	0.188153	-0.0689829	0.617309	0.947856	0.0312708	0.820794	0.999991	-0.492262	0.000370391	0.00142187	77.836	88.184	74.23	77.618	54.465	0
77622	NM_029943	Apex2	0.0239347	0.8636	0.963005	0.0934702	0.501505	0.925405	-0.0162439	0.907476	0.999991	-0.567891	6.52727e-05	0.00029707	5.096	4.744	5.466	4.87	3.377	0
226548	NM_146104	Aph1a	0.328943	0.00769917	0.0798874	0.0551407	0.655417	0.95142	0.108268	0.38096	0.999991	0.572082	3.51562e-06	2.12014e-05	23.917	27.526	24.949	25.123	35.298	1
208117	NM_177583	Aph1b	0.333768	0.069879	0.349987	-0.264369	0.16115	0.740529	-0.143253	0.446588	0.999991	1.64737	3.05135e-20	7.61916e-19	0.748	0.869	0.621	0.652	2.387	1
68318	NM_026674	Aph1c	0.791911	0.00380689	0.0469444	-0.334568	0.236556	0.814235	-0.103541	0.712478	0.999991	3.02517	1.13404e-29	4.94608e-28	0.317	0.522	0.247	0.281	2.87	1
56369	NM_019735	Apip	0.266894	0.0652424	0.336501	0.0738097	0.61152	0.946684	0.00951663	0.947941	0.999991	0.420676	0.00358678	0.0106272	12.096	13.341	12.744	11.848	16.056	1
69928	NM_027263	Apitd1	0.11144	0.449515	0.78324	-0.0127899	0.930977	0.990577	0.0602251	0.683371	0.999991	-0.775554	2.44341e-07	1.81689e-06	15.354	15.179	15.203	15.539	8.787	1
72103	NM_001170489	Aplf	0.165762	0.309517	0.682483	0.195857	0.229632	0.805548	0.0611332	0.708679	0.999991	-0.378859	0.021656	0.0504585	3.255	3.346	3.749	3.308	2.457	1
11804	NM_001102455	Aplp2	0.32719	0.396342	0.745914	0.263771	0.494132	0.923254	0.121682	0.752466	0.999991	0.95834	0.0129602	0.032371	10.422	12.297	12.936	11.205	21.912	0
71881	NM_027977	Apmap	0.126779	0.281997	0.656591	0.125507	0.286869	0.855302	0.151937	0.197593	0.999991	0.637713	5.21731e-08	4.2673e-07	11.123	11.112	12.182	12.011	17.171	1
11810	NM_001134391	Apobec1	-0.136187	0.462527	0.791716	-0.313372	0.0924091	0.593108	-0.00850416	0.963359	0.999991	0.626229	0.000610784	0.00222581	2.956	2.454	2.368	2.836	4.554	1
80287	NM_030255	Apobec3	0.213372	0.0112179	0.105466	-0.0704092	0.403317	0.905371	-0.0346115	0.681263	0.999991	0.193454	0.0215234	0.0502379	68.176	72.317	65.184	64.592	76.93	1
171504	NM_138310	Apobr	0.438237	0.216091	0.594634	-1.11323	0.00173197	0.045634	-0.723517	0.041562	0.999991	2.03998	8.20339e-09	7.45476e-08	5.434	6.932	2.327	3.03	25.26	0
103161	NM_133997	Apof	3.94021	1.78566e-30	9.32424e-28	0.0393572	0.925563	0.990324	-0.0892474	0.835542	0.999991	5.91107	1.45682e-68	3.39172e-66	0.048	1.196	0.051	0.04	5.255	1
245282	NM_177744	Apol10a	0.212113	0.728487	NA	0.792047	0.194698	0.775511	0.0197054	0.974262	0.999991	1.49493	0.0142294	0.0351378	0	0.005	0.023	0	0.06	1
328561	NM_177820	Apol10b	0.151677	0.781791	0.93748	0.625344	0.251642	0.827968	0.0973465	0.859074	0.999991	2.79762	2.32945e-07	1.73763e-06	0.152	0.165	0.296	0.159	2.135	1
626615	NM_001177533	Apol11a	-0.0107291	0.985995	NA	-0.0105593	0.986217	NA	0.0217157	0.971658	0.999991	1.45948	0.0160186	0.0389709	0	0	0	0	0.115	0
328563	NM_001143686	Apol11b	0.54538	0.369065	0.726378	0.89192	0.141024	0.705363	0.0194556	0.974524	0.999991	2.44821	4.73516e-05	0.000222491	0.004	0.027	0.052	0.004	0.304	1
71939	NM_028010	Apol6	0.214096	0.703198	0.90687	0.169594	0.762874	0.971704	0.0887731	0.874662	0.999991	1.53479	0.00597323	0.0165528	0.137	0.159	0.165	0.139	0.633	0
75761	NM_029419	Apol7a	-0.59675	0.275018	0.651432	0.0951273	0.861346	0.9816	-0.00608804	0.991088	0.999991	1.46256	0.00702306	0.0190841	0.384	0.188	0.416	0.359	1.487	0
108956	NM_175391	Apol7c	0.773056	0.156451	0.51974	0.174127	0.750195	0.971358	0.0737246	0.892868	0.999991	4.26424	4.03711e-15	6.90108e-14	0.246	0.514	0.299	0.248	12.443	1
223672	NM_173786	Apol9a	0.912344	0.0838854	0.38766	0.293893	0.578805	0.939752	-0.117579	0.824821	0.999991	2.48283	2.33206e-06	1.45713e-05	0.403	0.892	0.548	0.339	3.906	0
71898	NM_001168660	Apol9b	0.858295	0.0964492	0.415739	0.284113	0.583502	0.940532	-0.238051	0.647723	0.999991	2.36176	4.29375e-06	2.54029e-05	0.382	0.781	0.509	0.277	3.17	0
381823	NM_001109914	Apold1	-0.766096	0.00539687	0.0613658	0.281055	0.28002	0.849326	0.114836	0.662143	0.999991	-0.632821	0.0206019	0.0484078	0.413	0.211	0.508	0.434	0.253	0
68316	NM_026673	Apoo	0.240948	0.218132	0.597426	0.0701994	0.720236	0.962742	0.249291	0.202909	0.999991	-0.575758	0.00361902	0.0107113	11.87	12.889	12.524	13.893	7.775	0
621156	NR_004438	Apoo-ps	0.226792	0.261191	0.640454	0.0103376	0.959273	0.995097	0.240571	0.233671	0.999991	-0.584852	0.00426839	0.0123675	14.098	15.166	14.266	16.412	9.168	0
11820	NM_001198823	App	0.942216	0.0398346	0.246007	0.428377	0.350264	0.888794	0.0961194	0.834071	0.999991	2.51989	3.77395e-08	3.15546e-07	2.216	4.467	3.18	2.324	17.715	0
66884	NM_025825	Appbp2	-0.0143602	0.948868	0.986049	-0.174491	0.436026	0.910095	0.0435083	0.845949	0.999991	-0.51651	0.0212688	0.0497557	17.25	15.607	15.368	17.33	11.746	1
72993	NM_145221	Appl1	-0.360844	0.0454356	0.268444	-0.222931	0.216363	0.791247	0.114988	0.523534	0.999991	-0.700569	0.000103894	0.000452416	16.543	11.703	14.216	17.374	9.943	1
216190	NM_145220	Appl2	-0.217168	0.43069	0.7713	0.534613	0.0517918	0.451581	-0.304309	0.269856	0.999991	1.78044	8.52633e-11	9.60083e-10	5.177	4.03	7.721	3.993	18.784	1
11826	NM_007472	Aqp1	0.612458	0.246251	0.627669	0.360817	0.494642	0.923254	-0.0759446	0.885768	0.999991	2.23565	2.27696e-05	0.000114367	1.396	2.279	2.001	1.224	10.539	1
66333	NM_175105	Aqp11	-0.194409	0.626504	0.872507	-0.269958	0.499205	0.924445	0.126673	0.75114	0.999991	-2.71406	1.32398e-11	1.61278e-10	30.825	24.225	25.02	33.334	3.475	1
64008	NR_073483	Aqp9	1.31385	0.000441477	0.00854895	-2.35925	6.28748e-10	1.3813e-07	-0.847413	0.0243472	0.999991	2.15451	8.0774e-09	7.34834e-08	3.016	7.611	0.458	1.51	15.598	1
11836	NM_009703	Araf	0.035687	0.750041	0.924789	0.126083	0.259969	0.833505	0.0592967	0.596729	0.999991	0.483522	1.48453e-05	7.79275e-05	19.176	17.985	21.009	19.301	26.561	1
212285	NM_178407	Arap2	-0.810999	0.000239329	0.00505461	0.110683	0.6127	0.946684	0.035247	0.872081	0.999991	0.825884	0.000148744	0.000624202	1.655	0.843	1.791	1.638	2.947	1
106952	NM_001205336	Arap3	0.00393438	0.991281	0.996454	-0.0248048	0.945076	0.994322	-0.323812	0.368863	0.999991	1.40542	9.22523e-05	0.000405459	2.771	2.546	2.746	2.111	7.987	1
11838	NM_018790	Arc	-0.318253	0.318613	0.690121	0.689792	0.0271415	0.316795	0.402892	0.199688	0.999991	0.643539	0.039499	0.0846627	0.53	0.379	0.896	0.697	0.85	0
11840	NM_007476	Arf1	0.290001	0.0276442	0.192822	0.0191347	0.884495	0.984451	0.0344018	0.793963	0.999991	0.419402	0.00144629	0.00477953	160.187	179.348	162.971	159.58	212.334	1
11841	NM_007477	Arf2	0.181475	0.195724	0.5714	0.0694633	0.621228	0.947856	0.0628078	0.655583	0.999991	0.858925	6.12532e-10	6.38409e-09	4.458	4.631	4.69	4.538	8.073	1
11842	NM_007478	Arf3	0.234611	0.0841843	0.388422	0.0283735	0.834611	0.979392	0.00639762	0.962456	0.999991	0.308782	0.0230271	0.0532213	55.469	59.762	56.896	54.143	68.084	1
215821	NM_001033258	Arfgef3	0.716861	0.0214853	0.164959	0.0481876	0.877662	0.983731	0.120436	0.700439	0.999991	0.803383	0.00994919	0.0257977	0.633	0.989	0.664	0.672	1.137	1
78514	NM_030113	Arhgap10	0.250819	0.0733051	0.358521	-0.135772	0.333994	0.880103	0.0953078	0.497003	0.999991	-0.629942	8.42112e-06	4.66804e-05	9.425	10.278	8.588	9.803	5.98	0
76117	NM_153820	Arhgap15	0.134886	0.331227	0.69969	-0.519638	0.000191561	0.0080541	-0.11546	0.406302	0.999991	0.330114	0.0173319	0.0417026	21.655	21.736	15.067	19.369	26.895	1
70497	NM_001122640	Arhgap17	0.333008	0.129153	0.480412	-0.140099	0.523778	0.930704	0.0421671	0.847779	0.999991	1.37866	3.10355e-10	3.34648e-09	9.396	10.972	8.519	9.432	25.194	1
73910	NM_176837	Arhgap18	0.21924	0.336237	0.70414	-0.18918	0.407072	0.905451	0.0159039	0.944418	0.999991	1.17379	2.53752e-07	1.87927e-06	11.742	12.544	10.296	11.519	26.919	1
71085	NM_027667	Arhgap19	-0.0110785	0.959473	0.988489	0.0686519	0.752822	0.971358	0.106889	0.623919	0.999991	-0.712129	0.00110333	0.00374884	16.841	15.26	17.889	17.753	9.965	0
244867	NM_175535	Arhgap20	-0.681124	0.144269	0.503723	0.206946	0.655421	0.95142	0.324971	0.483366	0.999991	-0.947662	0.0427957	0.0906591	0.322	0.163	0.388	0.41	0.139	1
239027	NM_153800	Arhgap22	1.23416	0.024849	0.17893	0.88834	0.107295	0.629677	-0.0701707	0.900017	0.999991	2.86769	1.50038e-07	1.14874e-06	0.057	0.209	0.162	0.047	1.002	1
232201	NM_001037727	Arhgap25	0.396164	0.00399711	0.0487675	-0.4602	0.00093961	0.0285693	-0.292255	0.0353792	0.999991	1.0847	2.37391e-15	4.13931e-14	6.096	7.36	4.407	4.926	13.115	1
71302	NM_175164	Arhgap26	-0.347325	0.0384645	0.24049	-0.748683	8.41721e-06	0.000588752	-0.102703	0.540266	0.999991	-0.684287	4.66326e-05	0.000219424	8.065	5.77	4.779	7.314	4.905	1
544817	NM_133715	Arhgap27	0.446668	0.00702365	0.074338	-0.267719	0.107033	0.62933	-0.0508603	0.759325	0.999991	1.49794	1.32278e-19	3.1371e-18	14.105	17.689	11.746	13.191	40.099	1
268970	NM_172964	Arhgap28	1.38003	0.000121129	0.00283065	-0.0714119	0.851255	0.980271	-0.11182	0.770491	0.999991	3.5702	1.08978e-24	3.65396e-23	0.068	0.191	0.065	0.059	1.069	1
214137	NM_172525	Arhgap29	0.335765	0.513654	0.818075	0.662951	0.196446	0.776009	0.183528	0.721441	0.999991	2.10692	3.75133e-05	0.000179581	0.157	0.197	0.297	0.177	1.03	1
226652	NM_001005508	Arhgap30	0.00866109	0.955642	0.987599	-0.589123	0.000156069	0.00678097	-0.0612199	0.694232	0.999991	0.436304	0.00506573	0.0143448	58.328	53.626	38.743	54.309	78.266	1
330914	NM_001195632	Arhgap32	0.0481824	0.8612	0.962495	-0.185088	0.502145	0.925405	-0.30987	0.261566	0.999991	-0.686167	0.0130581	0.032586	1.681	1.59	1.477	1.298	1.006	1
233071	NM_178252	Arhgap33	-0.168587	0.407077	0.75339	0.142886	0.481622	0.920652	0.034831	0.863911	0.999991	-0.486425	0.0169792	0.0409731	5.802	4.717	6.474	5.731	4.073	0
223666	NM_001168288	Arhgap39	0.705909	9.77364e-06	0.000322445	-0.158826	0.324009	0.874982	0.134666	0.401733	0.999991	1.91865	1.15535e-33	6.1016e-32	3.578	5.406	3.221	3.818	13.722	1
171207	NM_138630	Arhgap4	0.0399139	0.840529	0.954291	-0.745671	0.000173615	0.00741932	-0.0280266	0.887661	0.999991	0.816969	3.76705e-05	0.000180177	32.357	30.536	19.091	30.623	57.233	1
71544	NM_027823	Arhgap42	0.525926	0.213543	0.591383	0.221372	0.601823	0.943585	-0.0573027	0.893077	0.999991	2.77567	3.0724e-11	3.64586e-10	0.188	0.266	0.229	0.169	1.713	1
216831	NM_175003	Arhgap44	0.864354	0.136489	0.492265	0.38732	0.504904	0.92652	0.192678	0.740226	0.999991	1.40803	0.0152334	0.0372441	0.202	0.47	0.317	0.247	0.91	0
11856	NM_178754	Arhgap6	1.60546	7.51489e-06	0.000254582	0.233967	0.516523	0.929196	-0.0194381	0.957124	0.999991	3.13045	2.04907e-18	4.46848e-17	0.792	2.494	0.955	0.749	8.565	1
216445	NM_001285785	Arhgap9	0.2325	0.0509982	0.289455	-0.293191	0.013973	0.209796	-0.0619938	0.603109	0.999991	0.818801	6.04185e-12	7.60941e-11	90.014	98.054	74.81	84.217	153.059	1
192662	NM_133796	Arhgdia	0.327554	0.0244378	0.176903	0.03268	0.82239	0.979392	-0.00713189	0.960931	0.999991	0.499793	0.000595668	0.00217792	187.293	215.443	192.135	181.664	263.084	1
11857	NM_007486	Arhgdib	0.321317	0.010354	0.0989837	-0.224004	0.0740195	0.541099	-0.138065	0.270845	0.999991	0.466071	0.000199966	0.000814148	324.887	371.716	278.022	286.738	444.564	1
72754	NM_001112723	Arhgef10l	0.30066	0.242128	0.623881	0.998812	0.000100664	0.00472939	0.437845	0.088466	0.999991	-1.36214	1.33445e-07	1.02981e-06	8.498	9.675	17.6	11.419	3.128	1
213498	NM_001003912	Arhgef11	0.382741	0.167074	0.534771	0.54342	0.0495379	0.439798	0.163493	0.556015	0.999991	1.85846	1.42375e-11	1.73304e-10	1.019	1.234	1.534	1.126	3.946	1
69632	NM_027144	Arhgef12	0.247126	0.385424	0.737313	0.203935	0.473921	0.919482	0.0380374	0.893866	0.999991	1.67854	3.253e-09	3.10463e-08	0.971	1.067	1.126	0.964	3.305	1
207212	NM_001081116	Arhgef17	0.281474	0.52387	0.824832	-0.0757212	0.863927	0.982058	0.164434	0.709701	0.999991	1.33348	0.00250666	0.0077681	0.815	0.939	0.772	0.904	2.413	1
102098	NM_133962	Arhgef18	0.0123314	0.948531	0.98584	-0.614172	0.00132062	0.0372495	-0.0707806	0.711063	0.999991	-0.549056	0.00408902	0.0118974	18.221	16.803	11.847	16.795	12.187	0
213649	NM_172520	Arhgef19	0.954424	0.0661423	0.339869	0.402995	0.439358	0.910218	0.000244097	0.999628	0.999991	2.16172	2.92968e-05	0.000143702	0.155	0.353	0.232	0.147	1.111	1
16800	NM_008487	Arhgef2	0.258844	0.154968	0.516894	-0.265678	0.144558	0.709026	-0.0747078	0.681567	0.999991	0.649754	0.000355728	0.00137259	37.673	41.361	31.396	34.724	58.928	1
52666	NM_028027	Arhgef25	0.539882	0.222733	0.603407	0.484745	0.27372	0.842983	0.0919936	0.835792	0.999991	2.04714	3.49291e-06	2.10876e-05	1.07	1.526	1.589	1.1	5.577	0
110596	NM_012026	Arhgef28	0.551693	0.304721	0.680087	0.626349	0.243449	0.821039	0.964965	0.0714062	0.999991	1.31305	0.0137771	0.0341229	0.028	0.048	0.057	0.076	0.109	1
230098	NM_001013377	Arhgef39	0.196966	0.23508	0.616295	0.0659652	0.691162	0.956503	0.0769438	0.643237	0.999991	0.832635	4.73525e-07	3.33505e-06	14.342	15.077	15.052	14.624	25.476	1
226970	NM_183019	Arhgef4	0.00734005	0.962964	0.990292	0.315245	0.0438649	0.413792	0.138417	0.380173	0.999991	0.419228	0.00722065	0.0195412	1.987	1.828	2.493	2.118	2.644	0
268739	NM_198249	Arhgef40	1.00993	3.0678e-10	2.52477e-08	-0.235102	0.145774	0.710265	-0.100215	0.535002	0.999991	1.79688	3.04497e-29	1.30397e-27	4.601	8.59	3.916	4.162	16.203	1
[truncated: 7,298 more rows]

## Sheet: PU1ENGHA
DEGs in PU1ENGHA cells (vs EVGFP)
[truncated: 763 more rows]

[truncated: 2 more sheets: PU1ETSHA, Legend]
