# Supplementary material for: Pioneering, chromatin remodeling, and epigenetic constraint in early T-cell gene regulation by SPI1 (PU.1)
Source: HighWire-hosted journal article supplement (doi:10.1101/gr.231423.117), 2018-08-31
Supplement: Supplemental_Table_S4.xlsx [file Supplemental_Table_S4.xlsx]

## Sheet: Blad1
Table S4: RPKM expression values for 171 T-cell developmental important genes DESeq2 calculations included. P-values were either globally adjused using DESeq2 (padj) or adjusted for comparison within the list only (list) using the Bioconductior qvalue package.
tracking_id	MGI Gene/Marker ID	Symbol	FLDN1_1 (GSE31235)	FLDN1_2 (GSE31235)	FLDN2a_1 (GSE31235)	FLDN2a_2 (GSE31235)	FLDN2b_1 (GSE31235)	FLDN2b_2 (GSE31235)	FLDN2b_3 (GSE31235)	ThyDN3_1 (GSE31235)	ThyDN3_2 (GSE31235)	ThyDP_1 (GSE31235)	ThyDP_2 (GSE31235)	EVGFP sample 1	EVGFP sample 2	EVGFP sample 3	EVGFP sample 4	PU1WTHA25 sample 1	PU1WTHA25 sample 2	PU1WTHA25 sample 3	PU1WTHA25 sample 4	PU1ENGHA sample 1	PU1ENGHA sample 2	PU1ENGHA sample 3	PU1ENGHA sample 4	PU1ETSHA sample 1	PU1ETSHA sample 2	PU1ETSHA sample 3	PU1ETSHA sample 4	PU1WTHA44 sample 1	PU1WTHA44 sample 2	PU1WTHA44 sample 3	PU1WTHA44 sample 4	EVGFP (GSE65344) sample 1	EVGFP (GSE65344) sample 2	PU1ENG (GSE65344) sample 1	PU1ENG (GSE65344) sample 2	PU1ETS (GSE65344) sample 1	PU1ETS (GSE65344) sample 2	log2FC_EVGFP_to_PU1WTHA25	pvalue_EVGFP_to_PU1WTHA25	padj_EVGFP_to_PU1WTHA25 (global)	qvalue _EVGFP_to_PU1WTHA25 (list)	log2FC_EVGFP_to_PU1ENGHA	pvalue_EVGFP_to_PU1ENGHA	padj_EVGFP_to_PU1ENGHA (global)	qvalue_EVGFP_to_PU1ENGHA (list)	log2FC_EVGFP_to_PU1ETSHA	pvalue_EVGFP_to_PU1ETSHA
ENSMUSG00000025085	MGI:1194500	Ablim1	24.8748	24.2064	13.8771	25.3517	132.321	88.2635	82.5964	90.0099	79.8558	187.366	201.964	67.249	67.845	68.782	71.166	33.861	35.653	36.105	32.846	57.016	91.397	97.657	93.77	74.793	76.421	79.77	77.62	18.218	20.36	14.54	13.116	35.354	31.239	87.634	66.037	39.24	31.759	-0.84827	1.63e-09	1.18e-07	5.39996e-08	0.295653	0.0353763	0.36757	0.101519	0.206898	0.14095
ENSMUSG00000029313	MGI:1100819	Aff1	23.0055	13.2459	14.7157	27.9664	56.8505	33.9082	35.1961	41.8508	34.5153	82.2378	91.4199	22.44	23.039	24.045	21.317	21.627	21.57	23.873	16.283	10.356	21.812	21.728	20.768	21.836	22.648	25.318	21.334	23.515	25.995	24.003	21.478	19.319	11.228	13.664	7.446	19.411	10.694	0.00387593	0.983461	0.994101	0.581718	-0.284309	0.128452	0.677121	0.256716	0.0471815	0.800779
ENSMUSG00000019256	MGI:105043	Ahr	4.0592	4.20315	8.58897	7.66924	18.6648	15.5405	7.6895	21.3874	14.7873	1.52229	2.6702	18.494	20.666	21.341	12.866	18.964	17.871	22.736	11.812	4.795	11.689	15.65	6.789	15.723	15.827	22.117	9.916	34.707	32.44	30.676	30.85	20.937	20.027	7.535	7.702	14.317	19.112	0.077906	0.788043	0.939611	0.506347	-0.870322	0.00268606	0.0639652	0.0150309	-0.153778	0.595696
ENSMUSG00000019564	MGI:1328360	Arid3a	29.0005	31.791	20.728	23.6458	17.8527	17.9588	16.8041	2.39212	2.36898	3.37034	4.38135	14.525	15.077	19.143	9.369	17.224	16.303	21.033	10.127	8.314	14.673	18.656	9.937	12.858	14.074	18.52	8.459	24.864	25.846	23.058	24.328	18.251	19.303	24.303	17.688	17.077	18.226	0.262623	0.336625	0.70466	0.343407	-0.183576	0.501949	0.925405	0.515384	-0.0700275	0.797847
ENSMUSG00000004661	MGI:1930768	Arid3b	6.77452	8.05189	5.46643	6.49914	19.1297	8.78246	6.53526	12.3828	7.04391	36.123	33.2277	8.484	7.449	8.089	6.836	6.571	6.055	8.239	5.387	5.797	7.396	9.405	7.444	8.133	7.571	9.46	6.915	7.793	7.628	7.36	6.83	6.365	5.645	9.485	8	6.63	6.556	-0.106109	0.499853	0.811691	0.425055	-0.0429105	0.784866	0.97741	0.60035	0.0967163	0.538175
ENSMUSG00000039219	MGI:2137512	Arid4b	20.6619	13.9495	22.2453	9.27832	49.9864	27.1835	33.2951	31.7145	23.1219	34.0716	35.6303	12.319	12.553	11.131	9.232	10.189	11.409	11.029	6.69	10.035	11.641	11.309	9.132	11.47	10.738	10.946	8.22	11.938	13.992	10.454	9.527	13.82	16.312	13.361	11.497	12.695	14.423	-0.0675955	0.690875	0.901968	0.486973	-0.104401	0.539126	0.933437	0.526719	-0.0887315	0.601757
ENSMUSG00000037447	MGI:2443039	Arid5a	39.3926	41.4081	44.6346	61.0702	37.8434	39.3993	33.1485	21.767	26.8231	14.5266	10.202	18.015	15.238	19.84	12.914	17.179	13.564	18.376	13.176	8.472	8.721	10.468	6.803	10.748	10.153	14.298	7.544	14.861	14.651	16.003	14.972	12.937	10.107	5.759	4.038	9.46	8.395	0.0361055	0.854752	0.960273	0.537659	-0.918138	3.37e-06	0.000278209	5.38803e-05	-0.569033	0.00395429
ENSMUSG00000055116	MGI:1096381	Arntl	3.83177	3.11096	9.3322	6.10831	12.7061	8.24421	8.67301	4.7035	4.92703	36.2402	33.2964	6.504	5.896	6.442	7.555	7.143	6.12	8.212	11.343	6.206	7.166	9.612	8.565	8.573	6.806	8.165	9.144	3.47	4.193	5.149	3.699	5.767	6.732	14.121	12.809	7.549	6.61	0.408588	0.0416967	0.253275	0.0900883	0.253365	0.207028	0.78408	0.329133	0.34513	0.0856197
ENSMUSG00000028053	MGI:2183158	Ash1l	9.57838	4.87277	5.37807	3.59411	14.3605	7.5139	9.32751	11.8944	9.70067	20.8116	17.1064	6.448	5.651	5.634	4.979	5.346	5.231	5.493	3.24	3.317	7.248	6.845	6.348	6.917	5.805	6.34	4.61	6.157	6.287	5.366	5.013	5.204	3.824	7.574	4.644	4.334	3.271	-0.0990037	0.625867	0.872267	0.467902	0.0573975	0.777375	0.976397	0.600013	0.0924359	0.648886
ENSMUSG00000030213	MGI:1858965	Atf7ip	17.2035	10.9612	11.4276	13.9462	25.4717	14.5145	14.217	24.8224	23.2384	37.0666	51.6175	14	15.509	17.474	14.733	12.661	13.919	14.53	9.136	6.144	15.644	16.54	14.627	14.218	16.202	19.111	13.784	15.002	16.429	15.285	13.843	9.771	7.171	11.19	8.079	11.297	10.598	-0.162014	0.487153	0.80473	0.425055	-0.223298	0.338266	0.881432	0.43765	0.0803615	0.730297
ENSMUSG00000004263	MGI:104725	Atn1	17.516	28.6466	9.78133	24.3673	25.8939	29.7091	27.1945	16.4065	15.8189	6.30891	9.3482	27.01	21.258	30.641	17.85	22.838	15.171	26.327	14.542	15.38	21.613	31.794	19.211	25.003	19.819	30.633	17.162	12.039	11.677	27.425	11.73	17.945	14.501	23.773	16.609	21.171	14.653	-0.167559	0.582151	0.851673	0.448508	-0.137606	0.651349	0.951267	0.552196	-0.0266157	0.930349
ENSMUSG00000025612	MGI:894680	Bach1	16.9725	13.6337	12.4188	14.5225	28.389	19.9633	29.5017	19.413	22.2407	61.2621	71.5636	10.453	12.079	11.595	10.643	8.633	10.626	10.95	8.061	8.68	15.509	18.037	16.483	9.722	11.868	12.588	10.514	11.398	11.753	11.9	11.728	15.564	11.261	28.73	16.172	13.534	9.916	-0.0936398	0.626156	0.872299	0.467902	0.372886	0.0521923	0.454041	0.132755	0.0457125	0.812002
ENSMUSG00000040054	MGI:2151152	Baz2a	26.9788	20.0597	19.7688	21.2516	56.8227	35.1228	37.1566	41.4029	31.0813	87.5774	78.8677	23.974	22.643	24.455	21.122	19.408	19.101	20.22	12.975	14.299	24.283	24.293	22	25.656	24.66	27.327	19.963	21.261	22.985	18.742	18.143	19.788	11.995	24.279	13.139	21.451	13.78	-0.228518	0.173038	0.543393	0.22052	-0.123719	0.460675	0.917352	0.495746	0.120322	0.473003
ENSMUSG00000000861	MGI:106190	Bcl11a	53.8483	51.3736	19.1171	23.6013	4.37116	5.17695	8.88216	4.63892	4.58615	0.0216931	0.0429512	2.473	1.455	2.003	0.346	3.685	3.384	3.891	1.458	1.457	1.599	0.877	0.79	1.574	1.457	1.412	0.678	14.529	18.485	13.469	17.553	5.755	4.786	3.232	2.755	4.782	3.714	1.01173	0.0114488	0.107151	0.0408546	-0.49276	0.219811	0.794841	0.338029	-0.137519	0.731759
ENSMUSG00000048251	MGI:1929913	Bcl11b	1.08627	0.832481	3.33382	11.894	99.9729	71.2697	91.077	102.849	110.125	124.828	159.987	66.054	67.594	57.179	52.555	45.77	49.444	40.514	34.137	38.906	64.841	49.942	52.038	65.744	68.448	56.075	54.486	4.182	11.998	2.872	0.722	22.572	19.872	17.797	12.862	22.916	17.608	-0.342491	0.371394	0.728029	0.361875	-0.223787	0.559176	0.93664	0.526719	0.0439828	0.90861
ENSMUSG00000022508	MGI:107187	Bcl6	2.32492	3.18474	0.414746	0.703873	14.3818	5.28891	7.80995	2.0446	1.60153	72.2965	84.0811	2.157	2.306	1.759	2.043	1.365	0.96	1.033	1.002	4.124	4.104	5.175	5.203	2.586	2.489	2.207	3.061	5.658	5.23	4.96	6.682	1.545	1.288	3.6	3.3	1.754	1.399	-0.77302	2.97e-06	0.000109577	4.18662e-05	1.14705	2.77e-13	1.44e-10	1.55006e-11	0.358321	0.0247021
ENSMUSG00000063382	MGI:1933114	Bcl9l	28.0488	34.4422	12.6987	36.4152	30.8173	23.6844	19.3002	7.24304	7.45782	8.42617	7.82439	23.151	18.754	25.215	13.101	15.955	11.459	17.515	7.542	12.102	24.91	34.502	23.587	22.192	18.21	24.158	12.432	13.748	14.099	23.022	12.281	16.017	13.282	34.98	22.48	22.83	15.699	-0.460409	0.133862	0.4881	0.190852	0.217263	0.479194	0.920652	0.505946	-0.0253808	0.934128
ENSMUSG00000049086	MGI:88184	Bmyc	20.2557	38.3574	13.0056	17.2923	6.2333	8.43166	10.1597	12.0294	12.9654	4.64552	6.23414	6.638	5.908	8.148	7.712	5.465	5.328	8.514	8.869	9.093	6.316	9.529	9.575	5.292	5.912	9.997	9.431	15.563	15.109	19.244	31.059	6.211	5.324	5.066	4.529	5.495	4.707	0.0999598	0.724411	0.91392	0.488529	0.25922	0.359967	0.892545	0.439281	0.153351	0.588647
ENSMUSG00000022914	MGI:1890651	Brwd1	14.9141	9.48022	9.20838	5.28961	40.5926	13.6709	20.2334	36.1469	27.6258	45.0009	36.0064	9.429	7.089	6.554	6.839	6.875	6.777	6.465	4.579	4.393	9.749	8.669	8.885	9.706	8.23	8.227	6.362	6.193	6.839	4.5	5.023	5.067	3.328	7.597	4.05	5.203	3.787	-0.165954	0.351629	0.715897	0.346309	0.102713	0.563987	0.937022	0.526719	0.156798	0.378494
ENSMUSG00000020423	MGI:108384	Btg2	5.17134	10.1697	4.89923	6.10041	59.8141	29.9977	32.2774	59.3849	80.8767	139.108	208.251	20.803	21.178	23.012	28.001	16.81	16.079	17.319	17.87	20.838	18.184	23.216	24.847	21.698	20.317	25.419	32.69	53.568	43.88	48.232	53.326	17.887	13.049	15.205	11.938	13.945	9.417	-0.315791	0.0446627	0.265314	0.0918885	-0.0951025	0.545107	0.936184	0.526719	0.14874	0.34371
ENSMUSG00000023055	MGI:1914738	Calcoco1	11.8503	24.0153	5.71477	13.4963	48.8364	38.2111	29.5164	30.0901	29.6681	36.4243	57.7223	17.314	17.928	17.089	14.019	9.637	8.592	10.473	8.779	14.492	14.202	17.936	16.333	19.467	18.423	19.68	16.076	11.834	10.252	16.82	12.652	24.918	16.861	28.451	20.968	27.222	20.618	-0.68421	8.23e-05	0.00205204	0.000629188	-0.0787633	0.649405	0.95087	0.552196	0.185347	0.284405
ENSMUSG00000026928	MGI:2685628	Card9	11.3745	10.9719	12.0679	13.3969	4.22903	3.05614	1.27844	14.5643	7.44742	28.9426	25.379	2.911	3.079	2.317	3.068	3.75	3.363	3.21	3.307	3.484	2.814	2.333	2.549	2.164	2.532	2.428	2.519	23.673	15.705	15.768	34.422	5.708	2.098	6.976	2.393	4.566	1.838	0.376439	0.104099	0.430043	0.175974	-0.0212414	0.927409	0.990415	0.633826	-0.175255	0.45431
ENSMUSG00000053411	MGI:1196439	Cbx7	4.81659	4.32408	2.87688	4.07647	10.1838	6.04386	5.16868	7.77872	7.16543	20.2491	22.8739	6.768	5.632	5.126	4.007	5.734	5.176	5.614	4.615	10.471	8.041	10.047	9.302	6.983	5.153	6.706	3.718	6.821	8.142	5.435	6.48	4.933	5.009	10.276	9.01	4.637	5.321	0.100787	0.577756	0.850131	0.448508	0.794908	1.02e-05	0.000697348	0.000142695	0.0979232	0.588876
ENSMUSG00000027829	MGI:1922664	Ccnl1	48.8826	43.0647	50.322	23.6441	113.724	61.0384	71.8615	101.696	95.7638	120.951	87.9484	39.397	35.853	31.578	27.432	31.662	30.782	32.659	20.85	39.371	39.291	42.96	37.161	46.184	36.636	37.857	24.845	34.76	39.798	28.925	30.842	40.596	38.374	46.949	37.069	42.882	36.883	-0.0778962	0.637805	0.876907	0.471035	0.236168	0.153178	0.725156	0.290565	0.144832	0.381227
ENSMUSG00000029068	MGI:1927119	Ccnl2	53.4814	45.7521	50.1513	42.8603	93.6902	71.0348	68.1352	99.7642	80.646	144.19	146.329	54.227	40.07	38.508	31.719	39.404	35.259	38.61	25.56	55.748	47.499	49.056	42.263	56.065	41.402	46.734	28.339	45.387	49.572	36.374	39.793	43.102	42.379	49.931	42.272	40.591	46.8	-0.10996	0.548874	0.837272	0.443498	0.238033	0.19419	0.775051	0.325062	0.0975601	0.594754
ENSMUSG00000021175	MGI:2384982	Cdca7l	59.8028	55.8659	47.9932	48.2334	24.7383	37.2796	34.997	38.9794	33.6703	8.21217	10.8301	25.509	22.918	26.872	22.625	23.438	25.781	25.666	19.702	21.097	23.344	25.742	21.128	24.422	23.307	27.312	22.144	16.136	19.648	18.758	17.481	21.972	18.751	20.134	18.703	24.368	17.626	0.079024	0.568869	0.84656	0.448508	-0.104367	0.452152	0.915636	0.495746	0.0297457	0.830283
ENSMUSG00000027035	MGI:2442564	Cers6	12.3479	4.92999	12.1695	12.7295	14.7475	7.1155	6.97964	10.3474	7.2976	19.3655	23.2072	6.626	6.341	6.011	5.249	12.164	11.39	11.029	5.085	1.445	6.872	5.987	5.315	6.895	6.814	6.537	5.151	28.883	27.031	20.512	21.458	7.958	4.857	6.602	2.936	8.458	3.785	0.788436	0.00910702	0.0897252	0.0348118	-0.291663	0.335499	0.880483	0.43765	0.100813	0.739049
ENSMUSG00000023852	MGI:88393	Chd1	26.8681	17.4425	27.5012	17.8471	38.3297	21.2908	23.6643	28.2052	21.2202	79.2328	78.2075	16.484	17.661	17.454	15.866	14.202	17.421	16.301	10.339	8.221	18.45	17.226	15.278	16.807	18.434	18.666	15.32	11.887	13.911	10.66	9.643	15.205	13.154	14.47	9.796	15.73	12.548	-0.0758133	0.711822	0.909087	0.4883	-0.19155	0.350693	0.889087	0.439281	0.0792705	0.699287
ENSMUSG00000039910	MGI:1306784	Cited2	23.61	36.4189	25.2248	40.5091	13.0785	17.2696	13.2799	6.50696	7.10191	21.4408	18.1522	15.678	17.868	19.862	16.348	20.125	17.915	25.912	24.333	15.384	18.31	25.577	23.628	14.888	14.987	18.813	16.82	69.709	67.063	88.845	75.184	35.091	23.157	22.451	16.314	27.597	19.533	0.446934	0.016265	0.137215	0.0461861	0.233938	0.2088	0.785268	0.329133	-0.0469951	0.800937
ENSMUSG00000020362	MGI:2144529	Cnot6	42.7738	27.3146	59.5059	19.2367	67.8689	42.0604	51.0807	59.1187	52.139	108.602	86.1544	35.098	41.236	39.011	38.313	29.148	39.781	37.781	26.018	20.318	41.779	39.742	35.826	35.745	39.56	41.3	35.217	23.9	30.69	25.371	20.85	33.596	33.435	30.805	25.186	35.034	26.37	-0.0683896	0.732407	0.917053	0.488529	-0.163925	0.412488	0.906196	0.475924	0.0301029	0.880365
ENSMUSG00000025958	MGI:88494	Creb1	52.1793	21.8828	34.1701	36.9596	58.985	35.5671	39.7549	71.1387	34.762	109.252	106.999	11.113	13.545	13.548	11.519	9.954	12.665	12.87	8.303	5.938	12.638	12.13	10.704	11.172	12.339	13.527	10.798	10.461	12.778	10.947	9.854	12.764	13.575	8.339	6.82	11.957	9.386	-0.0522782	0.798876	0.943045	0.506347	-0.266198	0.1946	0.775511	0.325062	-0.0113564	0.955861
ENSMUSG00000022521	MGI:1098280	Crebbp	17.8078	9.31216	4.72079	9.64236	23.3614	17.3483	18.1627	16.919	12.5265	33.1268	30.3691	17.001	15.454	10.146	8.694	16.172	14.522	9.96	5.834	5.813	17.75	10.739	8.998	17.85	16.25	10.814	7.748	16.973	19.135	8.925	9.711	5.903	3.799	7.278	4.437	6.794	4.38	0.000133113	0.999675	0.999807	0.584432	-0.227804	0.485472	0.9221	0.507784	0.0648925	0.842484
ENSMUSG00000040713	MGI:1344382	Creg1	35.2874	56.2798	73.4866	46.1393	21.6653	29.6059	25.4215	16.885	23.7248	7.04024	6.8858	11.898	10.984	12.506	11.464	15.234	17.679	16.876	18.871	13.356	12.489	14.006	10.536	12.058	12.56	12.603	10.26	12.905	15.227	13.131	16.557	27.3	16.868	28.365	18.586	33.074	21.116	0.671021	1.74e-06	6.85e-05	2.88219e-05	0.100412	0.476306	0.920236	0.505946	0.0612721	0.664193
ENSMUSG00000030970	MGI:1201686	Ctbp2	26.336	21.092	25.0246	26.1671	3.65913	5.54541	4.71201	0.575777	0.682927	1.30117	0.0429668	1.833	1.851	2.25	1.836	2.916	2.336	2.928	4.098	1.025	2.461	2.748	2.079	1.408	1.197	1.64	1.559	3.503	3.481	5.613	4.96	5.588	4.314	6.237	5.013	5.551	3.872	0.736095	0.00587274	0.0652944	0.0253768	0.0818305	0.760608	0.971704	0.595282	-0.359812	0.182923
ENSMUSG00000042508	MGI:1344415	Dmtf1	13.9875	11.9115	18.5256	6.72053	25.7158	13.9536	14.9343	25.1117	14.0912	40.0276	30.0354	13.235	13.039	12.413	10.939	11.202	12.3	12.523	8.454	7.771	13.537	13.223	11.474	13.331	12.373	13.984	9.433	14.883	15.873	13.194	13.164	16.298	17.388	12.309	11.171	13.653	14.356	-0.0247671	0.88718	0.969313	0.551081	-0.105983	0.543908	0.93566	0.526719	0.0254419	0.884137
ENSMUSG00000027478	MGI:1261819	Dnmt3b	129.136	99.4678	93.1662	95.9325	28.565	49.2327	38.7307	21.8881	20.9983	2.07835	1.3303	36.116	34.459	41.612	29.129	34.103	37.912	40.194	28.195	18.101	31.792	30.281	19.31	37.547	43.009	42.311	31.968	7.273	11.712	7.685	5.954	41.011	35.141	51.048	38.974	61.111	37.311	0.114917	0.591889	0.854454	0.452503	-0.499927	0.0197542	0.262682	0.0690888	0.172647	0.420584
ENSMUSG00000034765	MGI:2685183	Dusp5	63.0399	124.63	38.2803	56.1831	12.4396	24.0889	16.2261	10.3564	16.8483	10.9799	12.274	32.587	24.466	35.12	18.023	46.162	29.505	39.941	27.031	12.846	21.683	24.43	14.461	27.986	26.421	33.197	17.678	51.316	44.544	44.676	47.658	31.295	18.755	20.596	16.146	29.749	20.681	0.469655	0.0538858	0.299337	0.10299	-0.570358	0.0195511	0.261318	0.0690888	-0.0266665	0.912948
ENSMUSG00000018983	MGI:1096341	E2f2	3.59235	5.81213	2.85193	4.70444	18.757	25.9844	29.9866	28.4054	32.7471	142.8	139.642	21.206	17.594	20.453	25.311	10.732	12.394	12.805	12.174	29.779	36.166	41.997	48.581	20.868	22.062	22.889	26.798	5.305	7.953	6.285	5.172	3.701	4.697	23.834	20.7	7.133	5.166	-0.667389	7.95e-05	0.0019901	0.000629188	0.869017	2.59e-07	2.94e-05	4.83111e-06	0.175596	0.298386
ENSMUSG00000057469	MGI:1354159	E2f6	24.514	18.5369	29.9001	27.4773	14.1045	17.2591	24.6477	15.5993	21.8918	6.70796	5.8237	15.305	14.602	17.148	13.282	13.719	13.2	14.913	11.439	12.011	15.632	17.934	14.762	16.05	14.608	18.556	13.98	8.706	9.579	9.258	7.992	12.736	10.467	14.454	12.529	13.506	11.227	-0.0548921	0.71168	0.909087	0.4883	-0.00602814	0.967614	0.995097	0.647204	0.102399	0.490289
ENSMUSG00000021890	MGI:1921677	Eaf1	17.1235	14.7699	25.6496	14.166	37.1171	28.0956	34.0027	26.6826	29.9146	50.1224	48.0722	24.579	23.702	25.84	23.34	20.075	22.358	21.88	16.007	15.683	26.335	27.156	26.332	28.837	26.11	29.654	26.01	11.064	13.637	12.547	9.873	23.391	18.193	35.434	20.782	31.744	19.863	-0.144947	0.383177	0.735274	0.369732	-0.0354997	0.83084	0.979392	0.621341	0.216857	0.191768
ENSMUSG00000038418	MGI:95295	Egr1	2.98151	25.652	0.559804	1.21876	3.24406	9.23689	3.90273	6.06093	5.75857	3.30635	2.48536	13.233	9.24	10.316	8.831	14.06	7.286	11.432	4.974	16.584	17.761	16.314	19.156	14.005	10.576	14.973	10.888	31.659	20.255	44.61	17.976	12.926	3.792	4.048	2.75	6.84	3.463	-0.0162174	0.954453	0.987387	0.575539	0.702131	0.0133174	0.203652	0.0532303	0.296969	0.295431
ENSMUSG00000026436	MGI:102853	Elk4	51.2347	25.467	29.3786	32.2892	109.316	58.8231	89.8725	92.811	72.0554	129.246	101.54	21.85	20.829	16.155	14.163	14.242	16.084	12.09	6.71	8.03	24.174	17.755	13.282	22.753	22.204	16.289	11.61	12.38	15.506	6.935	6.728	7.509	5.792	9.366	5.522	8.843	5.226	-0.401495	0.187207	0.561221	0.235515	-0.197969	0.515418	0.929196	0.52143	0.0309955	0.918878
ENSMUSG00000024240	MGI:1278322	Epc1	19.2665	22.4386	14.4469	18.313	27.5605	29.2113	23.2887	26.986	27.6587	62.9978	59.4284	11.368	9.854	10.264	8.902	9.091	8.763	9.143	7.508	8.775	11.837	11.699	10.655	11.644	10.335	11.815	9.753	11.25	11.654	9.685	9.654	8.981	9.462	9.708	9.308	9.838	9.333	-0.0963058	0.39907	0.74754	0.381364	0.0846487	0.457739	0.916685	0.495746	0.146524	0.198707
ENSMUSG00000040732	MGI:95415	Erg	74.9374	50.2785	32.6736	50.5748	7.77359	22.9082	23.7512	20.177	13.5611	0.0848544	0.112008	11.309	10.477	10.961	7.507	6.333	7.092	6.42	5.676	4.306	7.535	5.534	3.871	9.091	8.964	9.6	6.482	0.668	1.837	1.008	0.788	15.303	12.767	9.845	6.622	15.556	8.978	-0.503575	0.045998	0.271135	0.0918885	-0.886744	0.000450152	0.0161785	0.00296352	-0.189365	0.452719
ENSMUSG00000020715	MGI:1930134	Ern1	23.2602	8.9037	13.1212	14.114	38.6078	22.9801	25.2432	23.2816	16.6405	4.14605	5.36315	21.92	16.263	19.59	11.834	13.44	10.602	12.862	6.686	4.596	18.51	21.995	13.05	21.569	15.69	22.08	10.251	7.33	8.377	7.644	7.456	8.994	6.574	12.478	8.274	11.147	7.584	-0.508342	0.113352	0.450631	0.18776	-0.24994	0.436201	0.910095	0.488186	0.0283764	0.92955
ENSMUSG00000032035	MGI:95455	Ets1	9.06445	8.55066	10.0636	18.6669	133.27	80.5348	93.2861	141.689	149.082	281.423	317.622	66.105	82.365	66.559	97.567	33.451	46.4	36.013	47.879	71.925	104.005	101.608	119.894	91.019	104.725	96.985	118.755	14.425	25.973	13.603	3.968	27.976	23.064	57.727	40.237	51.51	20.771	-0.742839	0.0149012	0.128942	0.0435579	0.321676	0.291656	0.858026	0.404693	0.417014	0.171615
ENSMUSG00000022895	MGI:95456	Ets2	8.8503	8.17313	5.66643	6.428	22.359	22.6541	31.2057	30.6946	24.7904	254.536	340.622	12.401	13.144	15.151	18.2	6.764	7.516	7.446	6.315	17.007	24.5	27.368	30.53	17.347	18.071	20.846	20.774	2.999	3.153	4.244	2.265	4.35	5.481	6.079	8.559	4.343	5.443	-0.910608	1.13e-05	0.000365844	0.000124784	0.727646	0.000426246	0.0156437	0.00296352	0.420906	0.0416639
ENSMUSG00000030199	MGI:109336	Etv6	75.9079	63.1264	28.5006	59.4858	47.0264	47.8843	46.9466	31.7674	27.9375	7.50548	8.02985	28.628	29.899	32.507	22.068	32.374	31.541	34.268	22.338	13.629	26.383	26.886	17.693	27.562	29.195	32.131	22.134	29.412	34.379	26.553	26.045	30.611	20.962	24.197	17.822	34.605	19.525	0.211025	0.303661	0.678823	0.32106	-0.416719	0.0423344	0.406738	0.118233	0.0142001	0.944828
ENSMUSG00000017897	MGI:109341	Eya2	9.10134	15.4548	4.83273	10.8976	18.6226	20.1196	5.91117	14.3683	9.11979	18.4597	17.4459	11.043	11.41	12.535	7.353	6.1	5.889	7.486	4.108	14.353	11.79	18.068	11.826	11.763	10.538	13.389	7.218	4.146	4.418	4.355	2.535	10.129	9.196	22.631	20.551	11.951	14.585	-0.692197	0.00367604	0.0457406	0.0173974	0.38082	0.108647	0.632218	0.227626	0.0524124	0.825443
ENSMUSG00000021250	MGI:95574	Fos	9.29839	46.9022	2.28643	3.63989	8.12176	46.5491	2.09985	3.24652	2.10486	11.2469	0.118626	11.394	5.424	6.474	5.538	8.899	6.904	7.524	2.762	6.363	7.477	7.286	6.163	11.23	8.559	6.425	3.252	15.744	19.237	42.97	13.007	52.944	20.528	19.979	13.304	36.351	12.845	-0.00568474	0.987825	0.99531	0.581718	-0.0669647	0.857358	0.98144	0.621819	0.0518009	0.889412
ENSMUSG00000003545	MGI:95575	Fosb	6.92389	21.7481	1.06561	1.839	3.25319	27.5744	0.921845	1.50445	0.984249	1.52399	0.0457185	5.514	1.962	2.164	1.757	2.819	2.431	2.371	0.57	2.896	3.051	1.666	1.608	6.573	3.767	1.984	0.577	9.814	8.182	8.794	5.702	11.4	4.165	3.62	2.122	8.829	1.573	-0.274728	0.536322	0.82961	0.443498	-0.244604	0.581906	0.940247	0.535682	0.153097	0.730269
ENSMUSG00000038766	MGI:95612	Gabpb2	34.5852	13.0387	24.9602	16.6966	50.8422	29.0241	36.4859	45.5853	40.5356	57.8799	59.1441	18.865	16.828	17.668	16.745	14.455	15.978	14.967	10.092	10.443	20.967	19.424	17.875	20.299	18.839	20.731	16.185	13.244	16.035	11.866	10.614	13.12	12.939	17.822	14.558	15.778	12.334	-0.198691	0.283484	0.6579	0.306242	-0.0349876	0.850176	0.980271	0.621819	0.154956	0.40277
ENSMUSG00000029275	MGI:103170	Gfi1	17.3496	22.2778	26.6948	31.9347	73.6997	65.1569	68.0658	57.1068	69.7833	68.465	76.3849	29.512	24.609	23.671	26.386	17.614	17.71	17.985	19.985	23.961	26.724	26.298	30.788	30.762	28.815	27.207	32.784	1.911	4.771	1.849	1.129	21.068	16.723	31.002	23.047	25.766	14.615	-0.363344	0.132094	0.485296	0.190852	0.0457685	0.849474	0.980271	0.621819	0.233819	0.332193
ENSMUSG00000026815	MGI:1276578	Gfi1b	24.934	39.3169	13.7275	26.0123	0.430856	0.568701	1.47084	0.536117	0.942562	0.545881	0.0510046	0.323	0.44	0.675	0.483	0.297	0.379	0.552	0.297	0.272	0.536	0.343	0.625	0.261	0.498	0.279	0.446	0.021	0.132	0.093	0.067	7.288	3.193	9.12	5.996	9.495	4.956	-0.189024	0.616348	0.866365	0.467604	-0.126458	0.736973	0.968872	0.589581	-0.243241	0.520876
ENSMUSG00000029720	MGI:5306917	Gm20605	14.681	12.8474	6.44517	7.39509	15.3599	14.7519	17.626	15.8843	11.5259	52.3143	42.2179	44.823	33.348	38.279	33.709	45.123	34.065	41.593	32.274	34.341	33.668	33.853	29.016	48.252	38.289	42.504	32.395	60.961	61.26	48.766	59.09	19.085	14.759	13.163	10.609	22.937	16.695	0.152797	0.223899	0.604525	0.267471	-0.196831	0.117438	0.652813	0.23897	0.136731	0.276523
ENSMUSG00000001524	MGI:1338799	Gtf2h4	26.9885	35.7378	24.2967	34.2019	20.1419	27.7986	26.8596	22.8266	30.2231	240.518	266.186	13.312	12.553	15.358	13.258	14.057	13.657	15.263	15.002	17.088	13.437	16.411	15.854	15.041	14.379	17.45	16.036	10.297	11.321	11.776	12.778	9.118	9.349	8.082	9.603	9.852	9.471	0.211464	0.124694	0.471588	0.190852	0.19744	0.151765	0.721718	0.290565	0.245576	0.0746988
ENSMUSG00000023079	MGI:1861942	Gtf2ird1	13.5411	15.8482	8.60267	11.2581	15.286	14.8	11.4981	10.738	10.9364	38.4174	40.1877	14.359	12.929	13.132	13.596	12.865	13.836	13.645	13	14.487	18.239	15.395	19.566	13.563	14.5	14.116	14.196	7.236	9.81	9.465	7.534	10.986	6.599	16.882	10.213	10.411	6.979	0.115076	0.406372	0.753113	0.384643	0.325604	0.0186854	0.25488	0.0690888	0.103499	0.455416
ENSMUSG00000062906	MGI:2158340	Hdac10	9.50907	9.92828	5.00736	7.12084	6.46239	7.10493	7.14769	4.97154	6.56939	17.7303	21.6183	4.717	3.725	4.399	2.764	4.58	3.602	4.405	3.792	2.933	3.076	3.878	2.914	2.214	2.378	2.616	1.343	13.92	11.178	12.937	15.803	3.275	2.908	1.928	1.989	1.966	2.093	0.195651	0.339572	0.706241	0.343407	-0.270555	0.189012	0.771921	0.325062	-0.772842	0.000201585
ENSMUSG00000026313	MGI:3036234	Hdac4	6.23956	3.54581	4.31314	9.24075	40.3156	19.4152	17.5954	87.7486	70.079	5.23348	6.55554	22.644	18.867	18.88	18.035	12.419	12.21	10.949	10.798	15.356	20.838	17.561	15.186	25.74	19.826	22.212	17.527	3.509	4.834	3.411	2.76	4.969	3.387	7.403	5.108	6.057	4.295	-0.615742	2e-05	0.000597261	0.00019064	-0.184981	0.199652	0.777505	0.328596	0.152191	0.291125
ENSMUSG00000008855	MGI:1333784	Hdac5	24.316	39.0213	7.46458	18.5391	7.86365	8.97813	12.718	9.04816	9.85633	22.9889	30.118	2.47	3.03	3.319	4.328	4.834	3.006	5.044	6.678	5.533	4.663	7.405	7.734	2.561	2.631	3.583	4.829	20.54	20.42	29.595	30.392	4.423	3.155	15.128	9.156	5.427	3.356	0.653213	0.0135967	0.120759	0.0423536	0.886556	0.00080379	0.0255868	0.00499768	0.0915324	0.730129
ENSMUSG00000022528	MGI:104853	Hes1	24.1527	30.2331	36.8444	57.9545	57.4283	33.6307	88.4771	44.7022	71.0967	0.944125	0.175228	36.313	40.53	47.852	35.825	36.151	33.075	43.01	43.65	81.7	57.316	74.518	60.679	42.208	42.188	49.883	48.551	6.782	12.852	16.851	7.379	29.503	40.805	74.872	68.291	38.474	48.819	0.0731949	0.766233	0.932198	0.504322	0.734122	0.00284649	0.0665824	0.0151701	0.217615	0.376701
ENSMUSG00000024986	MGI:96086	Hhex	39.6503	58.6593	28.7521	19.3481	4.68209	7.28589	10.9748	0.0875251	0.624871	0.182115	0	4.755	5.747	5.213	1.984	13.549	12.017	15.812	6.244	2.731	4.646	4.191	1.735	3.573	5.536	5.192	2.547	69.28	69.52	61.358	92.765	21.542	13.561	11.374	11.116	19.979	16.64	1.41731	2.11e-05	0.000623323	0.00019064	-0.384055	0.251795	0.827968	0.370793	-0.01646	0.960771
ENSMUSG00000008730	MGI:1314873	Hipk1	36.0294	22.3897	17.138	26.134	39.0955	32.4584	27.9422	51.6972	50.3611	70.9143	100.406	22.272	24.358	21.506	25.764	16.783	19.743	16.369	14.253	11.5	26.814	22.6	25.793	21.867	25.364	21.66	26.082	18.466	23.202	16.023	18.087	16.353	12.442	16.939	11.175	19.41	10.727	-0.337602	0.087193	0.396149	0.157559	-0.11772	0.550834	0.93664	0.526719	0.0623857	0.751893
ENSMUSG00000061436	MGI:1314872	Hipk2	23.098	8.83337	6.77579	13.4859	8.50402	5.41209	9.83039	8.39175	5.51259	3.25752	2.73588	5.359	4.915	5.497	3.492	7.159	5.906	6.188	3.527	1.272	4.945	4.624	3.764	5.822	5.798	5.355	4.02	5.831	6.486	5.397	5.005	2.492	1.684	2.5	1.397	3.186	1.766	0.341249	0.23303	0.614365	0.269301	-0.394911	0.168369	0.747057	0.303927	0.149038	0.60268
ENSMUSG00000015501	MGI:1338076	Hivep2	3.11548	2.0761	2.42751	2.90282	12.4531	6.40493	5.64864	10.7456	9.91675	19.7421	24.0132	6.148	5.665	6.615	6.167	4.123	4.254	4.951	3.389	3.172	6.293	6.011	5.399	6.368	5.98	6.938	5.634	3.227	3.138	2.732	2.103	3.099	2.554	2.948	2.334	3.168	2.579	-0.419529	0.0187358	0.149876	0.0477453	-0.238392	0.18136	0.762936	0.320081	0.0582081	0.743999
ENSMUSG00000028634	MGI:106589	Hivep3	1.99314	3.25265	1.59434	2.02499	5.21666	3.18368	4.11435	35.8386	32.0267	7.75648	7.02382	3.856	3.836	3.648	10.17	1.685	3.921	1.647	3.193	2.875	7.073	5.588	10.058	4.669	6.46	4.565	12.606	1.468	1.986	0.795	0.665	0.556	0.254	0.982	0.337	1.405	0.259	-0.780863	0.0462282	0.272152	0.0918885	0.225432	0.564758	0.937022	0.526719	0.405598	0.300201
ENSMUSG00000032329	MGI:1914117	Hmg20a	17.1548	17.5486	9.88957	12.5879	30.477	24.4921	22.1789	29.7842	27.096	43.1189	41.5599	15.256	13.644	14.871	13.749	10.862	11.24	11.676	9.545	13.017	14.946	16.554	15.43	14.585	14.248	16.004	14.51	10.046	11.047	10.094	9.861	12.375	9.625	12.288	9.985	12.226	8.706	-0.276415	0.01151	0.10759	0.0408546	0.0553263	0.611911	0.946684	0.54352	0.0875937	0.421994
ENSMUSG00000056758	MGI:101761	Hmga2	22.4183	25.5179	7.67996	2.9419	2.41274	2.39518	5.31509	0.666913	0.345103	0.568392	0.556621	3.449	3.78	5.017	1.214	2.685	2.36	3.89	0.441	1.999	3.141	5.239	0.815	4.001	3.651	5.685	1.029	0.804	0.883	4.937	2.551	5.553	23.219	9.202	23.411	4.766	18.323	-0.313978	0.542472	0.833637	0.443498	-0.218945	0.671018	0.953982	0.552196	0.0977794	0.849533
ENSMUSG00000020644	MGI:96397	Id2	6.09724	9.69671	5.53497	5.57173	19.7013	29.6101	25.4542	4.61436	6.28125	5.31955	1.62038	33.532	50.656	58.365	25.681	52.028	54.462	83.858	30.601	33.85	33.952	79.334	22.238	41.009	51.525	81.719	26.527	341.255	352.813	367.84	421.3	56.536	73.891	39.235	47.399	36.926	70.222	0.457349	0.199035	0.575371	0.244213	-0.00668005	0.985037	0.995097	0.652325	0.273357	0.442756
ENSMUSG00000007872	MGI:96398	Id3	3.30113	4.6854	0.763007	1.54095	21.1985	40.4845	23.9863	13.3408	26.0963	49.0986	43.8289	66.365	76.523	92.165	41.677	60.62	56.056	94.848	54.79	84.279	61.642	98.195	82.766	57.04	69.241	85.672	48.345	34.774	33.73	158.137	36.344	24.001	32.919	35.028	47.889	20.783	35.263	0.0504856	0.896489	0.972266	0.553405	0.202085	0.602519	0.943805	0.54352	-0.0391418	0.919662
ENSMUSG00000018168	MGI:1342542	Ikzf3	0.0374666	0	0.0457127	0.109893	1.92723	1.09524	4.30686	9.62442	7.5845	175.432	204.497	3.47	3.633	3.213	6.885	2.794	3.956	2.783	2.523	3.766	9.086	9.063	12.256	5.285	6.679	6.402	6.827	3.966	5.001	3.731	1.921	0.206	0.139	0.476	0.286	0.288	0.148	-0.339906	0.263696	0.642398	0.287996	0.924821	0.00229381	0.0559044	0.0135114	0.56875	0.0609291
ENSMUSG00000031392	MGI:107420	Irak1	66.1879	87.535	55.462	72.0912	36.1345	41.8927	31.7242	41.9475	33.7217	20.8107	30.1483	18.243	18.647	21.222	16.329	25.062	22.985	26.859	17.687	8.937	20.188	23.384	16.66	15.289	17.766	18.101	14.19	33.595	35.035	35.894	36.96	17.613	12.784	16.905	11.855	14.83	11.491	0.441027	0.018573	0.149126	0.0477453	-0.0275926	0.88302	0.984451	0.629461	-0.13857	0.460136
ENSMUSG00000029771	MGI:1350924	Irf5	13.2851	20.3981	8.05952	17.5502	1.36097	2.84525	2.7839	0.334185	0.20502	0.775886	0.117405	2.613	2.646	3.2	0.964	13.92	9.746	13.176	5.486	2.926	2.822	3.651	1.054	1.905	0.846	1.742	0.58	92.442	78.279	90.734	113.184	5.483	4.615	3.714	3.591	2.113	2.471	2.04943	1.56e-08	9.66e-07	3.87604e-07	0.122034	0.737519	0.969019	0.589581	-0.777227	0.0338464
ENSMUSG00000052684	MGI:96646	Jun	6.03283	18.1806	4.9618	7.03085	31.5124	47.3527	10.0895	11.6879	7.24734	8.84055	2.23631	15.366	10.875	10.395	6.309	11.976	9.939	9.044	4.819	33.913	31.729	47.086	37.955	17.034	14.781	11.99	7.917	27.824	22.378	49.208	19.392	19.819	11.884	13.071	11.874	16.51	7.795	-0.118911	0.705566	0.907379	0.4883	1.68101	8.89e-08	1.14e-05	1.98989e-06	0.277541	0.377693
ENSMUSG00000031540	MGI:2442415	Kat6a	24.4375	13.1998	10.4012	13.6142	32.3935	19.6763	22.2162	30.9411	22.6044	42.0792	54.4851	16.508	16.862	19.975	16.146	15.49	16.093	16.759	10.533	6.523	18.268	18.308	15.461	16.921	17.92	20.407	15.848	15.557	16.983	16.251	13.769	10.648	7.861	10.57	7.025	11.645	7.7	-0.106947	0.648009	0.881996	0.471979	-0.248382	0.289059	0.8562	0.404693	0.072897	0.75565
ENSMUSG00000052040	MGI:1354948	Klf13	18.1498	26.2489	11.477	22.0849	43.4239	31.0886	26.1942	27.5651	26.9463	136.72	160.251	27.401	26.448	30.475	25.467	21.209	19.304	25.883	16.849	22.571	32.998	40.222	39.116	23.495	25.546	30.795	26.704	28.932	30.02	31.113	31.373	20.559	17.535	29.004	20.86	22.205	17.635	-0.269854	0.127338	0.477061	0.190852	0.282858	0.109829	0.634722	0.227626	0.00286573	0.987079
ENSMUSG00000029178	MGI:1342773	Klf3	12.9398	13.4308	12.346	20.9455	78.3282	48.8356	50.2591	45.4695	40.2664	66.5824	63.1815	35.973	32.257	41.866	30.181	25.718	24.047	27.424	17.022	13.203	39.511	49.177	42.047	36.576	37.106	40.767	37.227	18.092	19.707	21.532	16.222	18.573	11.523	24.103	16.016	19.322	14.259	-0.427104	0.104466	0.43052	0.175974	0.0235006	0.928787	0.990429	0.633826	0.145352	0.580409
ENSMUSG00000000078	MGI:1346318	Klf6	8.67752	44.5786	5.04434	4.94955	8.85131	22.8145	5.66356	4.70943	7.30092	13.0012	12.7286	13.334	15.822	13.425	9.012	9.405	9.938	11.724	6.187	8.737	13.986	17.261	10.509	11.141	11.738	13.519	7.458	20.593	21.66	24.836	15.397	32.314	19.762	15.771	12.202	15.659	11.952	-0.327685	0.19084	0.564985	0.237084	-0.0380928	0.879084	0.984064	0.629461	-0.182764	0.465593
ENSMUSG00000025959	MGI:1935151	Klf7	2.60748	2.10991	1.24229	2.84373	4.15763	3.26203	3.55758	2.73857	2.49156	26.7426	25.7018	2.303	2.523	2.745	1.39	2.129	1.916	2.028	1.277	1.148	3.156	3.382	2.514	2.175	2.736	3.048	1.217	4.531	4.67	5.453	3.259	1.418	1.652	1.225	1.583	1.583	1.258	-0.148832	0.650608	0.883492	0.471979	0.157214	0.631108	0.947856	0.551812	0.0750104	0.819102
ENSMUSG00000002028	MGI:96995	Kmt2a	24.8718	12.084	11.4097	16.7883	65.9115	33.0517	41.7418	60.6185	35.7736	49.2435	43.7067	21.337	16.414	16.972	16.472	11.266	11.296	12.482	7.204	9.907	21.058	17.47	18.752	22.527	19.367	20.053	15.218	9.799	11.224	7.198	7.897	11.343	6.073	13.453	6.874	13.391	5.907	-0.602751	0.00227473	0.031602	0.0113038	-0.084936	0.667076	0.952983	0.552196	0.149605	0.448608
ENSMUSG00000006307	MGI:109565	Kmt2b	38.033	24.0221	15.951	26.1504	48.2808	37.8783	48.9697	51.2197	38.1442	91.7312	85.3683	19.237	14.492	17.098	13.997	19.07	15.648	18.36	11.562	11.571	18.147	18.092	16.259	18.744	16.308	18.815	13.185	23.441	24.491	18.773	22.716	9.051	6.199	11.368	7.658	10.766	8.339	0.121509	0.474128	0.797038	0.421527	-0.0212496	0.900402	0.987084	0.631732	0.0850491	0.616417
ENSMUSG00000038056	MGI:2444959	Kmt2c	16.4792	11.2943	7.74575	8.58211	37.0893	17.0934	15.2951	21.6905	12.469	40.1836	36.3281	9.702	9.019	8.236	7.088	8.182	7.457	9.269	5.052	4.081	9.049	8.883	7.931	8.767	7.72	8.812	5.888	11.413	10.968	7.522	9.043	8.356	6.101	10.115	5.86	6.857	4.63	-0.0539275	0.799878	0.943379	0.506347	-0.185289	0.383796	0.900177	0.452773	-0.0851676	0.688916
ENSMUSG00000024063	MGI:1925139	Lbh	23.4833	32.3312	19.3507	27.2056	83.8491	75.1091	80.8611	31.2039	35.5886	59.066	68.2826	48.748	50.758	58.486	43.811	67.194	60.71	79.301	55.808	37.721	39.115	45.87	34.805	38.496	40.452	51.856	37.637	109.154	108.021	112.972	114.442	47.435	44.045	40.14	31.883	34.832	33.268	0.4953	0.00161192	0.0243363	0.00890012	-0.358501	0.022597	0.286326	0.0766363	-0.212737	0.175979
ENSMUSG00000027985	MGI:96770	Lef1	0.330122	0.174929	0.934106	1.82325	46.5687	19.328	26.3504	90.0481	78.4086	76.912	78.0883	62.96	78.128	60.414	85.812	48.502	67.434	50.241	52.115	84.491	110.642	75.473	115.07	63.242	84.392	61.133	89.868	10.269	18.299	6.645	1.727	20.945	23.638	29.941	28.163	17.879	22.861	-0.224868	0.523928	0.824832	0.438726	0.32538	0.356409	0.890891	0.439281	0.0867579	0.805767
ENSMUSG00000034041	MGI:96891	Lyl1	98.9065	140.271	73.2039	112.347	8.54533	31.3166	63.7512	0.482324	0.293011	0.144355	0.333453	16.111	14.245	14.651	7.254	20.551	17.095	17.128	16.719	23.234	15.698	14.327	9.247	8.999	10.825	7.236	4.288	16.599	18.839	11.954	16.672	18.972	12.4	42.834	26.642	24.237	14.485	0.544848	0.0502726	0.28695	0.0979682	0.242255	0.384331	0.900177	0.452773	-0.657293	0.0185825
ENSMUSG00000051510	MGI:96911	Mafg	24.0768	17.7277	11.1573	17.6369	17.8609	16.8609	19.6124	10.2881	9.59724	5.27588	7.25231	13.22	11.879	11.953	7.896	8.104	7.729	10.255	5.534	5.728	10.593	13.516	8.704	12.813	11.421	14.514	7.611	5.883	6.821	7.848	5.578	10.864	10.986	18.704	13.46	10.856	12.373	-0.363253	0.160745	0.527002	0.21301	-0.218479	0.3986	0.905071	0.464691	0.0796023	0.75821
ENSMUSG00000032717	MGI:107687	Mdfi	114.691	170.15	55.0454	103.704	46.5351	76.8333	107.142	20.4849	18.0151	1.21327	1.63092	21.814	18.835	27.223	11.301	19.985	15.308	21.49	11.308	29.106	20.003	24.242	13.906	22.36	20.12	23.359	13.148	16.071	17.797	15.273	12.974	17.993	13.888	17.495	14.427	24.092	18.615	-0.0750611	0.771426	0.934761	0.5044	0.127879	0.620494	0.947856	0.546804	0.0337846	0.895959
ENSMUSG00000030557	MGI:99532	Mef2a	10.053	6.69421	5.1632	2.76814	13.0152	7.13413	7.54817	10.552	9.70423	71.3903	76.5713	5.239	6.124	5.79	6.766	4.866	6.055	5.948	4.438	4.811	7.909	10.572	10.823	5.459	5.944	6.598	6.233	8.226	9.523	11.958	9.02	4.695	4.871	9.08	6.528	4.35	3.669	-0.0339835	0.878079	0.966614	0.548859	0.488222	0.0273294	0.31768	0.0873896	0.062452	0.777994
ENSMUSG00000001419	MGI:99533	Mef2d	54.6478	42.7167	23.0258	55.544	84.5323	73.0314	86.723	68.5239	58.3559	181.449	157.896	34.346	28.997	33.336	31.743	27.235	24.839	29.068	26.038	23.379	35.44	38.643	38.445	35.082	31.85	37.245	35.518	21.444	24.04	21.783	25.651	21.729	15.061	32.398	20.566	25.339	14.88	-0.132044	0.340854	0.707734	0.343407	0.0755837	0.585484	0.940731	0.535682	0.16014	0.247866
ENSMUSG00000028522	MGI:1918398	Mier1	24.5898	14.6548	32.5494	11.8597	114.426	37.0904	33.1551	79.1914	62.4282	222.992	206.186	36.959	40.539	41.259	34.654	18.595	22.404	23.622	16.803	22.525	33.797	34.049	29.806	38.87	33.139	42.02	31.274	14.209	16.327	13.717	13.562	38.309	39.812	31.833	24.024	41.623	27.191	-0.780035	2.02e-07	9.94e-06	4.01518e-06	-0.359157	0.0166093	0.23638	0.0640992	-0.0386881	0.796321
ENSMUSG00000028496	MGI:1917372	Mllt3	6.2053	6.31685	12.7631	13.6975	33.2533	18.5657	16.1499	21.3004	20.7076	20.6504	22.2722	9.046	11.37	10.597	9.621	7.8	9.283	10.068	6.436	4.819	7.785	7.841	6.011	7.792	9.941	10.537	8.873	4.07	4.761	5.136	2.975	11.647	11.397	8.521	7.252	10.112	9.371	-0.141353	0.500388	0.812012	0.425055	-0.607486	0.00381627	0.0829783	0.0177962	-0.0767617	0.714407
ENSMUSG00000055817	MGI:2151172	Mta3	44.0248	72.7667	53.0582	86.2011	55.8085	70.4487	55.0205	109.551	135.338	33.3013	35.1964	47.798	48.645	50.169	43.132	42.855	42.62	44.496	35.064	33.881	45.168	43.683	39.163	45.016	46.519	49.34	41.124	59.674	56.159	55.265	54.631	46.558	31.781	50.224	39.126	49.01	35.525	-0.0699721	0.546613	0.836247	0.443498	-0.215289	0.0638109	0.505496	0.151948	-0.0207051	0.858437
ENSMUSG00000037235	MGI:104991	Mxd4	31.494	35.8462	16.5492	23.2361	69.8405	51.9446	35.5138	48.8668	41.9026	135.678	148.724	21.752	23.512	26.609	23.681	16.705	14.676	18.01	15.879	19.096	26.963	40.888	38.393	24.774	26.065	29.649	30.282	19.845	16.604	35.901	21.982	23.579	19.577	40.216	31.514	28.407	23.925	-0.407692	0.104365	0.430507	0.175974	0.365192	0.144914	0.709026	0.284534	0.245137	0.328023
ENSMUSG00000040463	MGI:106181	Mybbp1a	184.502	186.871	210.075	204.574	72.9544	128.563	125.903	135.815	152.716	38.3819	43.1751	73.319	68.27	89.398	82.914	91.542	98.744	98.75	77.95	56.261	84.243	84.336	80.402	73.136	79.147	90.27	83.38	39.138	52.615	47.982	40.995	52.808	47.787	41.944	47.388	58.391	52.27	0.347921	0.0348101	0.225558	0.0786279	-0.0468597	0.776256	0.976397	0.600013	0.0975877	0.553925
ENSMUSG00000022346	MGI:97250	Myc	105.235	174.807	77.7348	108.804	98.164	96.8474	123.454	149.648	158.475	25.1919	26.9633	59.966	54.892	68.244	77.944	50.052	59.262	59.618	55.267	67.02	79.683	85.371	101.791	55.882	65.965	69.682	87.891	12.28	20.912	18.912	14.368	31.143	30.241	24.493	29.61	35.177	41.963	-0.085835	0.664947	0.892035	0.478886	0.3414	0.0848658	0.57404	0.193836	0.144097	0.46713
ENSMUSG00000037169	MGI:97357	Mycn	54.5519	68.3024	33.1325	46.4851	2.93277	7.64517	7.09495	5.89831	6.58193	1.44162	1.1919	7.157	8.622	7.559	4.977	8.99	10.831	11.922	5.301	2.473	5.042	4.577	2.612	3.973	6.044	5.62	4.173	3.727	6.968	6.05	2.954	13.89	13.119	9.478	8.327	13.196	14.591	0.482077	0.116223	0.45583	0.189359	-0.886912	0.00399329	0.0858678	0.0178768	-0.428616	0.163543
ENSMUSG00000062627	MGI:2444584	Mysm1	10.421	5.04996	9.02333	2.96452	20.3548	7.99363	9.08758	11.0177	10.9318	16.4038	18.6119	5.497	5.444	4.678	3.912	4.207	5.106	4.625	2.697	3.254	6.667	5.735	4.823	5.946	5.358	5.458	3.384	6.342	6.768	4.339	4.67	6.145	5.672	6.195	4.519	5.771	4.912	-0.0918635	0.683736	0.899595	0.486973	0.0604578	0.78854	0.977541	0.60035	0.0782728	0.728448
ENSMUSG00000039697	MGI:2444847	Ncoa7	11.7586	13.2164	10.6421	8.71332	26.2231	23.4658	21.7679	8.51461	6.29312	7.15611	9.7277	6.487	7.141	7.475	4.159	6.038	6.282	6.381	3.733	3.588	4.877	5.811	3.979	4.945	5.198	5.698	4.116	9.099	8.639	7.258	7.928	10.95	11.993	9.702	7.777	9.756	9.724	0.0651162	0.762444	0.930859	0.504322	-0.436354	0.0433136	0.411704	0.118233	-0.221145	0.305422
ENSMUSG00000003847	MGI:1859333	Nfat5	15.5251	7.20718	6.48524	3.88843	42.0509	12.5324	13.4284	25.8317	9.76285	26.8853	30.6091	7.619	6.217	5.655	4.512	4.617	4.219	4.848	2.176	3.202	7.537	7.133	6.213	8.692	6.147	7.215	3.682	9.565	8.995	6.8	7.23	8.862	7.171	10.951	6.054	8.866	6.302	-0.441891	0.0938305	0.409947	0.166525	-0.000594427	0.998201	0.999226	0.657154	0.122197	0.642971
ENSMUSG00000031902	MGI:103296	Nfatc3	27.0196	27.9926	23.2286	18.1231	32.9205	28.1367	31.4369	27.6336	27.9724	117.414	148.862	19.664	22.916	25.48	25.785	18.485	21.601	23.173	15.236	12.073	26.038	27.018	28.314	19.524	23.276	26.398	25.84	18.884	21.724	22.229	20.044	24.678	16.153	24.371	14.622	25.732	14.92	-0.124062	0.574721	0.848329	0.448508	-0.0152117	0.945145	0.994322	0.64108	0.0647463	0.769628
ENSMUSG00000058794	MGI:97308	Nfe2	149.569	208.246	100.712	158.168	21.5229	40.0485	37.431	11.4875	11.8944	2.43312	0.311304	23.533	22.552	23.015	11.083	17.308	13.594	15.326	10.288	12.922	12.531	12.995	5.937	16.665	14.981	17.529	7.553	5.345	7.788	3.809	4.1	47.315	28.511	41.995	28.574	52.021	28.691	-0.358773	0.217928	0.597088	0.264134	-0.806685	0.00565073	0.111148	0.0236861	-0.437124	0.133446
ENSMUSG00000001911	MGI:97311	Nfix	25.3023	22.1423	11.3414	23.7365	13.7519	14.6746	27.3584	8.47624	13.3687	1.63771	1.48741	10.164	8.361	9.909	6.574	10.443	7.823	8.624	5.892	8.047	10.195	11.899	8.576	9.179	8.449	8.077	7.254	8.075	6.846	24.167	7.317	6.562	5.543	8.358	6.528	8.312	5.452	0.0305643	0.92396	0.97851	0.566842	0.122784	0.701379	0.959008	0.572968	-0.0498229	0.876373
ENSMUSG00000028163	MGI:97312	Nfkb1	92.1294	109.051	132.462	172.554	57.0703	82.3333	60.4736	47.1839	56.4467	39.3091	43.2364	51.75	55.847	55.967	45.277	68.647	64.962	71.862	49.963	31.024	47.108	54.507	39.339	46.565	52.696	55.627	40.445	142.843	150.827	140.53	145.08	60.574	40.4	69.048	47.757	60.11	45.953	0.408726	0.0173088	0.142449	0.0467614	-0.282036	0.1007	0.615847	0.220982	-0.049997	0.771029
ENSMUSG00000025225	MGI:1099800	Nfkb2	7.66105	10.3099	5.07645	7.44546	19.832	23.3614	53.0596	24.5107	24.8025	10.0876	11.3021	15.25	13.614	15.321	13.559	13.69	11.493	11.475	8.509	18.286	20.484	23.241	16.602	24.112	20.707	23.268	21.173	33.911	33.834	37.89	33.661	6.808	4.81	9.116	6.246	8.629	6.16	-0.221741	0.134537	0.488601	0.190852	0.434375	0.00327053	0.0740401	0.0166377	0.654406	9.28e-06
ENSMUSG00000021025	MGI:104741	Nfkbia	13.0796	21.7876	12.6149	25.7653	42.3961	51.2802	39.723	13.6944	18.7706	130.991	115.813	18.968	19.889	19.208	19.516	14.521	14.079	15.193	12.574	28.507	22.474	23.844	34.076	20.434	19.901	19.97	21.281	27.451	29.441	31.049	25.982	30.67	29.012	39.598	36.35	31.467	26.814	-0.327284	0.0174086	0.142961	0.0467614	0.480148	0.000442777	0.0160615	0.00296352	0.112197	0.413253
ENSMUSG00000015176	MGI:1918019	Nolc1	78.7049	89.0342	126.322	109.444	39.2445	65.0111	75.1635	76.784	103.218	32.0225	31.2956	44.759	41.107	53.234	54.045	48.767	56.928	54.301	46.384	44.18	49.598	49.479	47.851	45.347	47.413	54.315	52.455	18.695	26.087	23.959	19.641	28.928	31.099	21.119	25.82	31.523	35.656	0.223285	0.139645	0.497202	0.19276	-0.0194869	0.897456	0.986645	0.631732	0.090536	0.549316
ENSMUSG00000026923	MGI:97363	Notch1	168.878	113.524	46.4274	121.991	424.391	253.408	462.451	509.041	349.576	109.926	67.43	148.981	107.7	133.29	112.136	118.554	100.165	104.746	76.381	69.314	165.248	135.148	139.903	167.657	140.417	149.255	123.592	10.763	24.051	11.866	8.236	36.173	22.021	47.157	26.409	61.043	31.008	-0.189788	0.457316	0.78856	0.413188	0.014453	0.954861	0.995097	0.643769	0.234261	0.358898
ENSMUSG00000038146	MGI:99460	Notch3	25.608	17.6269	7.29653	15.5686	78.9093	81.9077	95.9301	142.844	113.619	28.1837	20.5728	48.372	38.519	45.08	44.129	39.102	35.986	37.104	33.137	19.585	50.891	45.374	45.892	59.411	51.425	55.336	54.225	5.481	9.202	20.95	2.276	13.797	8.522	15.502	9.673	18.23	9.234	-0.131501	0.728186	0.915744	0.488529	-0.115438	0.7603	0.971704	0.595282	0.324078	0.391711
ENSMUSG00000024431	MGI:95824	Nr3c1	5.69247	4.00181	5.92098	6.31853	33.8247	15.3622	14.4935	51.6197	58.746	43.2255	59.9674	12.551	14.786	14.761	19.881	6.777	10.263	9.119	9.678	6.487	12.84	16.325	15.645	12.472	13.598	15.811	19.104	7.954	9.18	12.055	7.92	14.591	9.296	14.71	8.192	12.422	6.293	-0.625542	0.0135279	0.120501	0.0423536	-0.266324	0.292896	0.858339	0.404693	0.0248313	0.921866
ENSMUSG00000023034	MGI:1352454	Nr4a1	9.47294	24.091	3.13844	5.25267	4.47645	8.03643	5.39567	6.66753	5.54278	4.14861	1.69826	6.778	4.956	4.82	4.181	8.204	6.63	5.343	3.574	13.817	12.563	9.805	12.116	8.659	6.325	6.085	6.157	37.824	38.243	23.589	27.712	1.768	1.729	1.576	1.763	1.892	2.101	0.321813	0.120475	0.462788	0.190491	1.18363	9.64e-09	1.6e-06	2.69721e-07	0.408015	0.0489658
ENSMUSG00000048490	MGI:1315213	Nrip1	15.7717	8.16533	9.52739	13.5341	29.1418	21.6727	23.2842	21.5086	18.5663	38.8669	48.8046	18.376	16.673	18.377	13.071	13.712	14.94	15.762	8.31	2.469	11.932	11.566	9.087	14.528	16.283	15.936	11.666	10.857	12.404	9.136	8.974	14.566	8.278	6.43	3.724	11.901	6.894	-0.191455	0.525311	0.825442	0.438726	-0.873703	0.00376938	0.082461	0.0177962	-0.133903	0.65687
ENSMUSG00000021488	MGI:1276545	Nsd1	19.3176	12.7603	15.5825	11.0354	26.6235	13.9509	17.7465	41.2589	31.675	34.2425	37.6313	11.67	11.561	9.859	10.515	10.637	12.593	10.492	7.398	7.074	13.335	9.969	10.763	12.357	12.843	11.211	9.726	10.967	13.376	7.962	8.84	10.832	7.587	11.956	7.135	12.401	7.555	0.0524711	0.776945	0.936279	0.504688	-0.0852721	0.645276	0.950527	0.552196	0.121393	0.512195
ENSMUSG00000031860	MGI:1931321	Pbx4	14.4436	14.7741	12.52	16.4959	36.5863	37.0428	25.3614	30.5267	24.0068	9.22987	9.40964	11.411	8.625	7.92	6.763	6.575	5.048	6.729	5.474	12.584	6.888	7.553	7.353	10.347	7.39	8.579	6.263	0.808	2.343	0.932	1.158	10.752	8.813	13.709	9.979	11.04	9.691	-0.396014	0.120751	0.462788	0.190491	-0.00908648	0.971522	0.995097	0.647204	-0.057937	0.820077
ENSMUSG00000018537	MGI:99161	Pcgf2	27.7475	14.4495	18.036	11.213	15.7147	11.8601	17.8466	9.5578	7.18162	5.73085	2.78865	4.848	3.374	5.229	2.591	3.365	2.713	3.915	2.312	5.954	5.084	6.99	4.866	4.705	3.96	5.731	2.718	2.314	2.116	6.373	2.652	3.609	3.779	5.811	6.214	4.385	3.995	-0.238116	0.475028	0.797665	0.421527	0.442837	0.183038	0.763913	0.320081	0.119348	0.720034
ENSMUSG00000024193	MGI:98647	Phf1	3.5829	4.73379	2.00496	2.78492	6.71242	6.4992	7.38268	9.60577	7.05684	20.5925	25.2046	7.671	6.336	5.405	5.319	5.223	4.22	4.953	5.512	11.954	7.919	9.242	9.314	7.3	6.365	6.779	4.655	7.443	7.443	8.929	8.21	3.55	3.205	7.184	5.058	3.799	3.981	-0.180117	0.308083	0.682354	0.322306	0.624749	0.00036803	0.0139672	0.00294207	0.0596815	0.735083
ENSMUSG00000058318	MGI:2384756	Phf21a	26.3959	25.6599	9.69848	13.71	40.0176	30.31	23.456	38.1582	23.9262	39.5755	43.2502	5.63	5.292	5.063	3.977	4.012	3.796	4.376	2.982	5.922	6.03	7.619	6.07	5.775	5.183	6.385	4.501	4.821	5.041	5.518	5.052	6.689	6.053	10.019	7.252	7.001	5.446	-0.253175	0.125999	0.474508	0.190852	0.35139	0.0330978	0.354045	0.0974795	0.168361	0.307885
ENSMUSG00000033020	MGI:1349393	Polr2f	146.392	112.394	140.158	216.864	66.6629	90.2355	111.218	113.12	116.192	50.963	50.689	90.617	74.56	98.919	87.196	98.412	87.851	102.494	115.241	146.833	90.056	97.396	100.831	94.382	79.133	88.228	96.727	66.788	65.857	68.507	66.213	44.643	61.697	47.716	62.09	57.998	71.169	0.320225	0.0337398	0.2207	0.0779826	0.302728	0.0447486	0.416213	0.119242	0.0630281	0.676481
ENSMUSG00000009739	MGI:102935	Pou6f1	0.359889	0.480941	0.0825549	0.294062	8.72687	6.42984	4.25244	10.3732	9.92004	81.072	74.2407	2.956	2.677	2.376	3.611	1.677	1.637	1.644	2.463	1.805	2.264	1.703	2.917	3.679	2.905	3.121	3.583	2.098	2.44	3.403	1.99	1.661	0.977	0.947	0.524	1.851	1.267	-0.496099	0.0241645	0.176094	0.0571812	-0.402791	0.0669224	0.517116	0.156037	0.22422	0.305552
ENSMUSG00000060098	MGI:2384879	Prmt7	33.7495	32.7933	39.9021	50.7833	12.3507	18.991	21.2657	26.7681	34.3198	13.8074	13.277	15.013	13.27	16.046	16.831	16.993	17.396	18.418	19.936	17.221	17.667	17.359	21.633	16.282	15.892	17.076	18.24	8.467	9.354	11.054	8.584	9.541	9.379	7.69	8.482	10.419	9.473	0.373059	0.00798316	0.0820397	0.0317365	0.265586	0.0591208	0.483792	0.147037	0.18227	0.195705
ENSMUSG00000023048	MGI:1913401	Prr13	62.3845	115.489	44.4803	103.79	63.0291	70.9867	45.4298	16.8756	12.9827	4.69316	7.19069	61.087	61.389	68.781	48.577	68.635	48.139	78.104	58.667	61.976	42.75	68.303	45.758	44.848	44.533	60.982	40.094	116.561	101.047	131.852	137.796	79.807	81.869	77.444	76.515	57.715	76.478	0.194502	0.342074	0.708235	0.343407	-0.139307	0.496448	0.924024	0.514456	-0.2844	0.16519
ENSMUSG00000029507	MGI:1929237	Pus1	48.8522	46.1716	44.1657	54.8724	24.0198	34.0165	32.726	37.5089	34.6475	13.136	10.9049	23.116	21.532	28.142	22.411	28.136	27.083	28.253	25.608	27.355	25.588	27.247	24.431	22.144	22.908	24.596	22.244	20.255	23.209	21.989	20.883	16.029	15.482	13.409	16.025	17.907	21.035	0.318723	0.0144239	0.126328	0.0434402	0.126358	0.332682	0.879558	0.43765	0.00505084	0.969156
ENSMUSG00000061311	MGI:97848	Rag1	4.49348	2.03237	18.0637	13.0592	453.418	128.617	97.455	261.677	163.765	1095.66	1214.27	102.089	98.686	113.845	123.904	52.089	63.968	59.329	53.991	56.035	139.6	143.807	156.989	131.57	119.894	145.528	146.414	1	7.533	2.166	0.262	47.168	45.893	70.523	50.819	64.45	39	-0.672977	0.144156	0.50366	0.196261	0.144786	0.753355	0.971358	0.595282	0.297244	0.51887
ENSMUSG00000032864	MGI:97849	Rag2	6.22274	7.59332	18.1701	4.56256	63.1107	29.9231	23.3111	39.9029	31.4501	109.318	106.5	18.925	19.781	25.353	23.342	14.81	18.022	19.131	16.624	13.898	18.53	18.595	17.762	20.956	20.512	26.295	23.37	0.638	1.64	0.806	0.271	14.383	15.053	8.08	7.101	14.243	8.907	-0.211342	0.43977	0.778118	0.404693	-0.335209	0.220485	0.795472	0.338029	0.0970992	0.722567
ENSMUSG00000037992	MGI:97856	Rara	7.30784	12.8136	4.27601	7.563	15.5586	18.6369	16.0329	11.9601	9.88239	26.2824	34.2399	16.547	15.966	17.259	10.344	20.652	16.319	23.112	13.667	9.346	9.273	15.733	9.066	12.84	14.873	16.022	9.545	31.487	30.413	37.106	38.887	8.967	7.842	11.248	8.755	6.791	6.501	0.408612	0.0815133	0.381799	0.150023	-0.465306	0.0476448	0.432323	0.124007	-0.116888	0.618608
ENSMUSG00000022105	MGI:97874	Rb1	5.4519	5.65735	6.98795	2.32805	14.067	7.72039	10.1081	11.6714	11.9781	32.981	33.8165	7.375	8.244	8.278	8.16	6.544	9.314	11.197	6.456	4.277	9.04	10.469	9.649	6.144	8.03	9.34	7.492	14.126	16.501	15.847	14.557	12.954	8.404	13.432	6.867	9.15	5.244	0.186099	0.433165	0.772454	0.404693	0.0501496	0.832767	0.979392	0.621341	0.00599246	0.979876
ENSMUSG00000031666	MGI:105085	Rbl2	17.363	13.4071	13.0549	9.35062	18.6172	12.3774	12.6296	15.0385	12.5565	45.4327	42.8145	9.262	10.929	12.177	8.485	9.351	9.442	11.664	7.176	6.301	10.743	14.054	9.567	9.547	10.252	13.028	8.383	21.377	20.951	23.907	23.398	12.473	8.573	14.82	8.533	11.542	7.348	0.00509866	0.981757	0.994101	0.581718	-0.0219141	0.921717	0.990275	0.633826	0.0587346	0.792247
ENSMUSG00000031134	MGI:1343044	Rbmx	32.3484	22.4904	43.2236	28.9703	72.6499	52.4689	51.1453	68.9305	52.527	91.6709	100.137	31.678	26.604	22.059	20.588	20.048	22.296	20.879	13.95	20.782	27.117	24.728	22.16	31.04	24.998	26.722	15.596	13.537	18.784	12.197	10.661	29.521	34.183	29.646	28.591	29.496	34.902	-0.242678	0.228756	0.60976	0.267471	-0.0881993	0.661691	0.95142	0.552196	-0.00223271	0.991162
ENSMUSG00000031586	MGI:1334446	Rbpms	18.5951	30.1172	10.6331	13.8571	11.391	12.829	18.8709	1.60697	2.28815	0.218333	0.100995	6.674	6.11	7.585	4.716	3.927	2.412	5.114	2.366	4.721	5.798	10.1	5.719	5.652	6.178	8.483	5.541	3.281	2.318	6.247	3.586	12.587	9.524	12.227	8.595	13.425	9.271	-0.652694	0.0209415	0.162125	0.050763	0.164398	0.559139	0.93664	0.526719	0.0864553	0.758851
ENSMUSG00000028150	MGI:104856	Rorc	0.277713	0.105864	0.0933469	0.057684	1.1918	1.06886	2.7758	3.12937	2.751	301.668	295.922	1.041	1.98	0.779	6.015	1.181	1.419	1.353	2.316	1.724	2.95	2.739	6.288	1.652	3.652	1.481	4.942	5.175	4.98	9.142	7.362	0.097	0.01	0.155	0.16	0.057	0.022	-0.420065	0.351934	0.716117	0.346309	0.404344	0.369506	0.894539	0.444669	0.268704	0.55106
ENSMUSG00000070691	MGI:102672	Runx3	76.0081	78.4074	38.0258	82.4197	52.0187	54.1718	62.2643	17.2708	17.1046	7.09401	4.62742	44.888	39.526	44.593	27.246	46.409	39.934	47.353	26.025	20.304	26.994	32.668	21.027	31.791	32.533	37.879	21.102	79.237	76.234	63.882	89.123	49.967	44.71	57.574	43.24	42.417	46.241	0.151389	0.496081	0.809591	0.425055	-0.615043	0.00571426	0.112256	0.0236861	-0.289198	0.193661
ENSMUSG00000003868	MGI:1342299	Ruvbl2	122.092	134.389	114.643	189.57	48.2045	88.2234	77.9015	76.6378	84.7557	51.0879	57.8241	61.059	55.735	72.765	64.712	78.869	74.03	81.848	76.989	68.635	70.38	72.293	73.627	57.326	66.182	70.111	67.494	34.789	41.026	37.626	38.588	42.635	42.491	50.154	54.517	44.311	43.294	0.414559	0.000877744	0.0149345	0.0054522	0.157077	0.207756	0.784934	0.329133	0.0840458	0.500467
ENSMUSG00000023927	MGI:105084	Satb1	51.3456	58.8906	29.7824	40.2626	152.437	90.7149	76.6939	146.451	125.683	1051.43	1175.05	33.191	34.393	32.177	38.282	22.318	26.743	25.2	20.64	39.917	34.199	32.976	40.403	33.645	34.747	34.007	41.765	28.439	34.724	18.842	17.273	33.21	28.722	20.505	16.957	34.168	28.325	-0.398594	0.0130334	0.117559	0.0423536	0.0936675	0.559385	0.936641	0.526719	0.105498	0.510892
ENSMUSG00000044770	MGI:2446140	Scml4	3.40513	3.53388	1.8596	3.42164	29.4918	14.704	7.82131	15.0009	18.2043	14.3605	17.4777	5.813	6.702	4.272	5.898	2.227	2.265	2.197	2.185	3.075	3.07	2.698	3.668	4.856	4.849	4.81	5.834	3.189	3.063	2.157	2.543	4.576	3.062	2.154	1.727	4.557	3.175	-1.20201	1.17e-18	2.81e-16	5.81407e-17	-0.845486	4.1e-10	9.28e-08	1.52954e-08	-0.108222	0.418908
ENSMUSG00000038384	MGI:2652820	Setd1b	19.2059	11.6146	5.73604	14.0655	30.6053	18.9492	24.1835	28.597	21.5777	58.2088	46.0872	11.369	9.17	11.034	10.428	13.333	10.585	11.443	7.874	4.032	10.734	10.442	10.148	11.706	10.817	10.582	10.251	14.727	13.897	11.415	11.603	3.999	2.315	4.91	2.603	5.674	3.228	0.165253	0.438166	0.776443	0.404693	-0.247475	0.245853	0.822569	0.368717	0.0811979	0.703291
ENSMUSG00000037111	MGI:1920501	Setd7	17.0254	11.9464	11.3501	11.9929	30.7746	13.9236	14.1383	27.32	18.3521	56.806	54.5534	15.778	15.653	14.316	12.157	11.975	12.422	12.314	7.89	8.442	16.83	18.051	14.066	16.018	14.806	15.809	11.962	12.624	14.228	12.009	11.039	16.398	12.553	19.869	13.334	15.986	11.445	-0.23788	0.226494	0.607367	0.267471	-0.0190029	0.92301	0.990279	0.633826	0.0543248	0.782333
ENSMUSG00000025486	MGI:1927665	Sirt3	54.0857	67.4088	35.0015	51.3617	24.1728	28.0342	20.4134	8.44639	8.48337	6.06885	7.91215	14.97	13.055	13.457	8.718	15.782	13.091	15.611	11.999	12.144	10.489	11.129	7.798	12.009	11.314	12.637	7.501	24.164	21.755	20.317	24.607	23.728	21.634	19.639	17.027	24.616	21.708	0.286979	0.136342	0.492048	0.190852	-0.267713	0.166418	0.744708	0.303927	-0.1642	0.395891
ENSMUSG00000029050	MGI:98310	Ski	7.35272	9.5366	3.83877	7.96708	7.03752	9.22959	11.4755	8.72806	12.8823	20.3112	27.4445	11.346	11.039	12.976	8.7	12.383	10.753	13.182	7.868	11.235	14.871	19.693	16.682	12.044	10.921	12.758	9.122	15.835	15.705	23.972	14.879	6.414	5.263	17.059	12.254	7.361	8.101	0.122692	0.57951	0.850862	0.448508	0.477204	0.0310734	0.341616	0.0944409	0.058731	0.790868
ENSMUSG00000024921	MGI:99603	Smarca2	19.5524	24.3277	7.74447	7.21094	39.2256	33.4884	27.1394	27.394	21.6996	44.857	43.325	14.356	13.802	14.013	10.264	14.851	13.812	15.318	12.196	11.35	9.785	11.586	8.163	10.094	8.873	12.651	7.86	29.546	27.763	31.187	27.915	11.484	17.322	7.605	9.442	9.581	15.57	0.0736441	0.712411	0.909326	0.4883	-0.322572	0.106711	0.628345	0.227626	-0.330278	0.0986699
ENSMUSG00000006587	MGI:1353563	Snai3	1.25064	1.79835	0.563817	1.23233	20.5217	10.9659	5.46558	7.23941	11.949	9.07558	11.278	5.709	5.203	5.315	5.748	2.784	2.737	3.22	3.354	10.759	6.78	10.434	11.929	5.368	4.222	6.176	5.063	1.456	1.917	2.06	0.869	3.286	1.867	10.169	7.52	3.199	2.799	-0.706161	0.00127199	0.0201482	0.00743632	0.831603	0.000111623	0.00516643	0.000960967	-0.0349133	0.872257
ENSMUSG00000028483	MGI:1916338	Snapc3	10.932	8.64934	13.3534	11.3855	27.0788	12.8421	14.913	19.0394	18.9461	33.9941	44.0932	11.009	9.865	8.991	8.504	9.69	8.767	11.47	7.096	5.862	9.664	9.636	8.916	11.43	9.154	10.517	8.425	9.728	10.273	8.127	8.595	13.998	12.092	12.503	9.583	11.83	13.076	0.0752994	0.639827	0.87761	0.471035	-0.170659	0.29073	0.857987	0.404693	0.0768899	0.633127
ENSMUSG00000001424	MGI:1929266	Snd1	166.571	216.952	118.659	188.233	87.2325	124.621	103.983	92.3183	103.028	34.8117	50.7807	85.111	81.22	96.94	76.71	83.731	79.872	92.461	76.102	65.71	79.551	94.524	78.354	78.397	82.184	95.115	74.382	56.492	61.925	73.286	59.319	60.372	53.151	67.753	64.633	59.473	57.895	0.0894369	0.56768	0.84656	0.448508	-0.101387	0.517156	0.929652	0.52143	0.000644218	0.996716
ENSMUSG00000070643	MGI:98361	Sox13	32.3685	41.7349	17.2507	35.7501	39.117	56.0663	71.7905	34.0918	30.8908	1.3703	2.95113	22.748	17.735	25.129	25.769	9.039	10.628	10.858	11.432	7.6	11.864	13.438	9.079	24.737	26.355	28.736	29.939	0.974	2.545	1.358	0.62	5.077	3.864	2.269	3.023	7.382	6.955	-0.944779	0.000371322	0.00733106	0.00263601	-1.07191	5.4e-05	0.00285282	0.000549413	0.295754	0.264538
ENSMUSG00000027109	MGI:1277166	Sp3	22.1768	18.084	26.0669	9.06052	49.9557	29.7307	26.8179	39.3643	38.2473	80.5316	63.5652	24.121	29.819	29.772	27.764	21.401	27.736	26.934	20.16	14.341	29.09	29.159	27.928	24.534	28.163	28.706	27.75	19.64	23.166	22.048	18.22	26.106	25.65	25.132	17.751	24.716	19.069	-0.0793141	0.687246	0.900422	0.486973	-0.154544	0.43281	0.910095	0.488186	0.014322	0.942045
ENSMUSG00000002111	MGI:98282	Spi1	92.2911	117.4	39.84	50.4985	3.39541	12.4441	14.1466	0.693305	1.34919	0	0.0421558	7.164	9.357	9.055	2.977	297.98	196.779	250.364	179.38	80.378	83.848	98.408	115.596	678.279	436.865	394.337	501.414	572.588	502.871	385.198	555.107	18.58	10.094	598.094	174.489	1189.81	374.487	4.89394	9.44e-88	1.43e-83	9.38201e-86	3.53504	1.3e-46	2.02e-42	1.45493e-44	5.86891	2.2e-125
ENSMUSG00000008193	MGI:892986	Spib	0.422361	0.714716	0.501502	1.11336	13.0591	8.68453	6.64168	23.0386	19.6526	0.753653	0.895654	9.157	9.433	9.738	14.899	5.24	4.71	4.177	7.924	8.665	10.826	9.405	15.511	12.479	12.572	13.176	17.206	3.8	5.651	1.967	1.403	3.462	2.059	4.456	1.66	4.791	2.249	-0.789361	0.00678033	0.072306	0.0280779	0.0354154	0.90314	0.987533	0.631732	0.381739	0.189421
ENSMUSG00000003992	MGI:1914220	Ssbp2	25.4324	28.6135	17.9911	14.6289	51.5042	35.2365	30.4404	34.1486	29.1388	140.797	146.028	5.117	5.131	5.17	4.893	2.01	2.261	2.573	2.895	4.841	4.619	5.715	5.69	4.898	4.653	5.905	5.046	1.346	1.304	2.178	1.995	6.027	5.096	5.314	5.243	5.649	5.284	-0.908307	3.37e-06	0.000123534	4.18662e-05	0.0340085	0.861187	0.9816	0.621819	0.0557324	0.77449
ENSMUSG00000026104	MGI:103063	Stat1	11.7088	11.3142	9.61183	10.4967	26.2445	18.8237	17.9033	32.7388	28.0135	16.5139	18.5865	44.113	43.976	30.213	42.179	35.58	23.069	23.539	27.019	26.016	25.152	23.211	29.114	38.132	29.852	29.538	34.887	66.777	48.965	54.109	69.748	15.047	10.618	12.337	8.515	16.982	11.133	-0.41769	0.00582338	0.0648885	0.0253768	-0.619792	4.3e-05	0.00239967	0.000534717	-0.237249	0.117222
ENSMUSG00000040033	MGI:103039	Stat2	8.71423	6.46791	7.35119	7.07596	17.5523	11.1805	11.67	16.566	11.6825	20.8044	24.1331	13.115	12.136	11.048	9.898	18.819	13.087	14.386	10.254	8.601	11.389	11.163	10.209	12.445	11.045	11.913	8.999	47.089	35.648	35.062	46.238	10.305	7.596	10.382	7.259	10.436	9.123	0.41137	0.0136369	0.121046	0.0423536	-0.159358	0.340211	0.882669	0.43765	-0.0184728	0.911943
ENSMUSG00000062939	MGI:103062	Stat4	15.9991	22.7652	17.3674	10.0581	38.455	27.5806	28.3747	12.9469	14.7965	10.9865	9.2067	17.736	19.729	18.516	12.514	10.939	10.169	12.306	8.037	10.87	11.262	11.202	9.01	16.281	15.674	18.855	13.004	13.675	9.938	10.676	11.363	28.8	24.217	13.894	11.268	24.319	21.245	-0.587807	0.000668086	0.012073	0.00442655	-0.685146	7.38e-05	0.00372436	0.000688293	-0.0610698	0.723207
ENSMUSG00000045098	MGI:2444557	Suv420h1	22.4232	11.753	15.6808	12.8365	34.8482	21.0028	20.566	35.8153	26.8104	60.5968	67.1936	9.478	9.209	9.347	7.485	7.278	7.815	8.076	5.483	6.818	10.115	10.259	9.22	10.218	9.182	9.942	7.932	9.445	10.5	9.318	9.06	9.27	7.75	9.698	7.736	8.518	8.096	-0.177425	0.243549	0.625308	0.276571	0.0268392	0.859853	0.9816	0.621819	0.104763	0.490701
ENSMUSG00000031832	MGI:109576	Taf1c	11.6248	13.1652	10.1491	15.3285	9.85921	12.5374	13.4144	38.1043	30.1783	27.1956	40.8662	9.032	8.233	8.729	9.213	8.241	8.154	7.964	7.602	9.509	8.192	9.955	9.061	9.449	7.947	9.073	9.627	5.53	7.511	6.045	6.223	4.287	3.426	4.864	3.778	6.098	4.58	-0.00836264	0.938812	0.981655	0.572421	0.0588426	0.588727	0.940731	0.535682	0.0736934	0.498694
ENSMUSG00000032228	MGI:101877	Tcf12	29.8595	28.3683	38.8377	30.8184	173.369	122.415	110.262	102.925	93.8681	132.061	144.452	71.666	74.056	86.158	74.693	45.686	54.221	56.014	42.17	32.749	76.528	82.228	73.283	74.087	78.379	92.226	80.004	17.364	22.648	23.008	14.829	48.115	43.542	48.438	41.614	50.451	36.812	-0.477699	0.0377219	0.237219	0.0833116	-0.21399	0.351914	0.889087	0.439281	0.123078	0.592344
ENSMUSG00000000782	MGI:98507	Tcf7	138.583	263.33	318.536	442.604	738.315	653.542	551.271	611.72	697.46	1537.06	1748.36	408.298	481.191	485.993	445.042	273.471	335.518	374.539	273.206	388.821	496.947	588.735	661.028	323.269	427.528	437.869	429.383	71.033	125.401	95.212	30.883	485.841	344.552	779.597	510.957	499.052	353.214	-0.385925	0.154427	0.516242	0.207403	0.211057	0.436081	0.910095	0.488186	-0.113122	0.676366
ENSMUSG00000024613	MGI:892003	Tcof1	46.2962	53.4064	0	64.5419	34.734	50.2278	56.188	83.045	0	79.7564	102.89	48.369	49.395	54.09	75.917	45.357	54.272	48.381	59.493	35.73	53.429	46.909	61.237	59.03	70.838	65.702	94.524	15.841	25.708	20.905	16.877	24.83	16.548	29.345	19.496	39.321	20.227	0.002837	0.98918	0.995756	0.581718	-0.201264	0.336061	0.880483	0.43765	0.387763	0.0637697
ENSMUSG00000034771	MGI:104635	Tle2	5.75754	4.34637	0.74514	2.13121	1.49513	2.61263	4.07108	0.178253	0.141084	27.693	44.1924	0.747	0.705	0.697	0.684	1.833	1.029	0.817	1.215	10.67	6.688	10.376	10.848	1.236	0.459	0.406	0.686	2.122	1.651	10.211	1.466	1.286	0.795	25.327	17.448	1.309	1.056	0.75148	NA	NA	NA	3.20244	NA	NA	NA	-0.0270892	NA
ENSMUSG00000024642	MGI:104633	Tle4	20.1434	19.9174	26.19	23.4923	20.7358	17.6477	17.16	5.21773	7.01736	4.97935	5.70036	11.196	12.502	13.784	8.98	11.652	12.906	15.129	11.022	4.238	7.802	8.404	4.724	10.643	11.391	13.525	9.367	9.774	11.512	10.093	11.386	17.805	16.213	17.854	14.342	21.022	18.841	0.241452	0.257605	0.638029	0.284469	-0.866375	5.1e-05	0.00273232	0.000549413	-0.00622768	0.976719
ENSMUSG00000029833	MGI:109275	Trim24	14.0067	10.5839	13.3067	10.1501	22.2619	17.5645	16.8575	20.7678	15.8166	43.4223	39.119	7.538	7.527	7.548	6.254	4.896	4.8	5.412	3.851	4.418	6.106	6.938	5.718	6.725	6.967	7.413	5.689	5.854	6.244	5.787	5.47	10.016	7.767	8.643	5.172	7.994	7.768	-0.469731	0.00178002	0.0258931	0.00931095	-0.323526	0.0312222	0.341616	0.0944409	-0.0602013	0.688185
ENSMUSG00000022010	MGI:109127	Tsc22d1	66.1447	89.8061	38.7959	42.1074	110.014	76.8732	89.9181	68.7468	62.8389	21.2834	17.4983	15.181	14.963	17.996	13.565	21.582	19.504	20.431	21.575	19.688	16.938	19.724	17.399	17.596	14.423	17.144	14.528	24.666	23.798	81.848	30.343	31.956	27.636	55.129	44.038	35.764	28.393	0.0740688	0.797474	0.942566	0.506347	-0.475217	0.0998016	0.613601	0.220982	0.101131	0.726063
ENSMUSG00000031431	MGI:1196284	Tsc22d3	14.4697	43.8973	11.3474	11.6703	32.1922	36.0732	22.6537	29.6873	37.0803	93.5712	92.5218	22.381	24.252	19.243	13.799	15.785	16.99	17.355	16.499	22.108	17.505	17.124	14.115	22.37	19.481	18.799	12.614	32.33	32.233	29.678	32.655	20.932	16.133	14.051	11.289	17.17	13.197	-0.126287	0.489427	0.806324	0.425055	-0.166884	0.361104	0.893585	0.439281	-0.0866803	0.635238
ENSMUSG00000038393	MGI:1889549	Txnip	44.6753	75.3321	16.6214	19.9254	50.5194	79.9946	35.6457	41.7609	68.2027	266.931	353.037	40.853	37.036	41.443	39.206	25.999	21.7	35.122	28.796	32.66	27.219	55.568	57.432	37.757	32.857	56.92	44.263	72.727	59.98	94.882	98.081	60.992	47.825	62.46	54.3	46.838	39.646	-0.368927	0.132603	0.485871	0.190852	0.114614	0.640221	0.949075	0.552196	0.155559	0.525854
ENSMUSG00000030189	MGI:2137670	Ybx3	148.091	160.625	149.598	185.326	32.5105	63.2291	67.4429	92.9195	121.467	23.8617	22.5599	61.163	64.656	85.65	92.123	76.291	88.951	96.489	114.653	74.857	93.349	103.211	116.336	56.082	76.841	72.025	102.129	47.117	50.825	72.876	76.055	44.777	43.242	52.85	54.359	51.838	41.789	0.416375	0.0764656	0.367593	0.143388	0.329793	0.16058	0.739512	0.299529	0.0649116	0.78246
ENSMUSG00000033454	MGI:2442326	Zbtb1	19.1601	7.88986	19.6891	9.58268	42.9309	22.3885	20.8521	27.2509	28.0798	32.8474	30.3707	16.106	17.653	17.411	14.556	12.753	14.059	14.884	9.99	6.809	15.447	15.677	12.318	15.088	16.183	17.052	13.579	10.321	11.701	10.841	9.579	13.08	11.722	11.754	8.833	12.718	10.316	-0.211323	0.302319	0.677422	0.32106	-0.384767	0.0604711	0.49152	0.147125	-0.0418558	0.838089
ENSMUSG00000063659	MGI:1353609	Zbtb18	13.2561	10.1962	12.8055	9.73641	15.2469	10.664	11.3645	17.5984	14.1799	53.5205	48.1064	12.22	11.301	10.574	10.225	13.927	12.98	14.581	10.358	8.083	12.426	12.528	12.838	10.564	10.59	11.081	9.129	23.18	21.05	17.445	20.101	11.902	11.207	14.366	9.163	11.917	8.677	0.338606	0.0203427	0.159034	0.0505443	0.0335792	0.818302	0.979392	0.618799	-0.0604527	0.679464
ENSMUSG00000047412	MGI:1925123	Zbtb44	13.6039	9.84998	16.9157	8.77652	31.7317	16.0469	15.8935	22.922	17.7089	36.1516	27.2396	6.499	7.296	5.956	5.3	4.115	5.131	5.122	3.558	5.096	8.123	7.105	5.959	6.713	7.03	6.597	5.338	3.292	4.26	3.091	3.13	6.869	6.105	6.824	4.975	6.806	4.767	-0.342792	0.04502	0.26672	0.0918885	0.062931	0.712499	0.961613	0.577834	0.0762611	0.655252
ENSMUSG00000024238	MGI:1344313	Zeb1	7.79781	5.53506	8.41549	9.48565	14.6429	13.1617	15.8587	16.593	16.3134	30.7545	38.0846	7.723	8.276	8.87	8.174	6.784	8.004	8.296	5.461	5.001	9.539	10.702	10.293	7.406	8.69	9.992	9.093	7.148	8.677	9.509	6.889	7.911	6.652	9.268	6.72	8.297	5.763	-0.0781704	0.718879	0.911126	0.488529	0.0929655	0.668477	0.953323	0.552196	0.134795	0.534675
ENSMUSG00000057894	MGI:1921283	Zfp329	4.37684	2.33931	5.15341	1.58126	22.4032	6.85771	10.2968	12.1499	8.47409	15.5327	17.3119	3.401	3.244	2.594	2.204	2.296	2.498	2.291	1.522	2.087	3.944	3.506	2.955	3.931	3.589	3.606	1.908	2.385	2.978	1.826	2.122	4.783	4.937	5.509	4.131	4.792	3.904	-0.264673	0.252275	0.632673	0.281714	0.117693	0.610139	0.946194	0.54352	0.217116	0.346862
ENSMUSG00000037001	MGI:99183	Zfp39	2.96145	2.6212	3.13044	2.68955	5.04584	4.49838	3.5708	6.95736	3.50111	17.8699	20.843	2.664	2.892	2.302	2.681	2.038	2.42	1.941	1.703	1.298	2.852	2.208	2.76	2.62	2.545	2.708	2.694	2.468	3.336	2.241	2.2	1.966	1.885	1.808	1.827	2.301	2.047	-0.234018	0.244887	0.626617	0.276571	-0.206472	0.304723	0.865721	0.415901	0.0467551	0.815795
ENSMUSG00000051550	MGI:1915740	Zfp579	10.7588	17.2719	3.39937	7.32354	23.8465	19.9494	23.3896	23.4535	19.6164	43.7624	56.3897	10.205	7.481	7.639	6.294	7.018	5.18	6.701	5.114	13.912	8.859	10.353	9.735	11.045	8.812	9.862	6.244	5.567	6.205	6.203	5.467	4.279	5.193	5.799	4.809	5.357	6.453	-0.262491	0.173069	0.543393	0.22052	0.429594	0.0250083	0.302387	0.0823196	0.214524	0.263938
ENSMUSG00000046311	MGI:99662	Zfp62	15.5984	9.27329	19.364	5.82899	34.2453	18.1929	20.4172	22.9023	19.3993	30.2147	21.3296	12.976	13.974	14.329	12.789	11.816	14.526	14.119	9.218	7.726	15.005	14.457	12.31	13.646	13.147	15.121	12.723	14.996	16.747	12.832	13.013	17.156	16.961	15.572	11.943	17.729	12.234	0.0101241	0.955509	0.987599	0.575539	-0.13432	0.459387	0.916685	0.495746	0.0524062	0.772764
ENSMUSG00000021945	MGI:1923257	Zmym2	15.2179	10.1024	20.28	5.99926	31.1274	14.927	16.4742	21.3508	16.3173	28.4597	25.4951	9.009	10.661	10.403	8.719	7.283	9.077	9.086	6.036	4.014	9.773	10.114	8.741	9.646	9.538	11.138	9.007	6.227	7.205	6.66	5.465	14.14	10.947	13.333	8.222	12.938	9.247	-0.165203	0.454029	0.78609	0.413188	-0.250648	0.256043	0.831258	0.372152	0.0587063	0.790142
ENSMUSG00000021156	MGI:1913755	Zmynd11	46.6797	27.5058	32.1687	30.6107	74.8867	54.7275	45.4161	66.9198	46.9322	84.8667	94.1465	25.902	24.482	25.33	21.403	19.125	20.038	21.003	15.867	14.997	24.097	24.501	22.253	25.109	22.886	25.22	20.631	18.096	18.693	20.756	17.253	23.262	19.778	20.139	15.139	21.454	17.367	-0.21806	0.166167	0.53424	0.217297	-0.182266	0.247091	0.822937	0.368717	-0.0100636	0.949033
[truncated: 14 more columns]

## Sheet: Legend
	Table S4: Developmental index genes: regulation in normal pro-T development by PU.1
	A curated list of 171 developmentally dynamic regulatory genes, defined as described in (Champhekar et al. 2015) from data in GSE31235 (Zhang et al. 2012), were monitored for changes in expression in PU1WTHA25, PU1WTHA44, PU1ENGHA, and PU1ETSHA samples.
	Columns D-N show RPKM values from GSE31235; columns O-AH show data from this study (GSE93755); and columns AI-AN show data from a previously reported shorter-term analysis of effects of PU1ENGHA and PU1ETSHA, from GSE65344 (Champhekar et al. 2015).
	RPKM, pvalues and p.adj values relative to EV-transduced controls in this study are shown, as well as q values for differential expression in response to PU1WTHA among genes within this list.
