# Supplementary material for: Pioneering, chromatin remodeling, and epigenetic constraint in early T-cell gene regulation by SPI1 (PU.1)
Source: HighWire-hosted journal article supplement (doi:10.1101/gr.231423.117), 2018-08-31
Supplement: Supplemental_Table_S5.xlsx [file Supplemental_Table_S5.xlsx]

## Sheet: Sheet1
TABLE S5: Effects of acute PU.1 disruption on gene expression in DN2 pro-T cells
GENE	Control sgRNA 1	PU.1 sgRNA 1	Control sgRNA 2	PU.1 sgRNA 2	Fold Change	P value	Adjusted P value	GENE
Annotation/Divergence	17738/17738.rsem/17738_STAR_RSEM_mm9_tagdir/	17739/17739.rsem/17739_STAR_RSEM_mm9_tagdir/	18065/18065.rsem/18065_STAR_RSEM_mm9_tagdir/	18066/18066.rsem/18066_STAR_RSEM_mm9_tagdir/	sgCont_DNs vs. sgPU1_DNs Log2 Fold Change	sgCont_DNs vs. sgPU1_DNs p-value	sgCont_DNs vs. sgPU1_DNs adj. p-value	Annotation/Divergence
Ncf1|NCF-47K|NOXO2|Ncf-1|p47-phox|p47<phox>|p47phox|-|5 G2|5 74.47 cM|protein-coding	754.27	22.91	792.98	20.92	-5.14304	2.15633e-147	5.18534e-143	Ncf1
Hbb-b2|AI036344|Hbb2|Hbbt2|beta2|-|7 E3|7 54.85 cM|protein-coding	3225.06	463.91	3607.51	578.67	-2.72527	7.46672e-144	6.47183e-140	Hbb-b2
Hbb-bt|Beta-t|-|7|7|protein-coding	3211.34	462.96	3595.41	576.67	-2.72388	8.07398e-144	6.47183e-140	Hbb-bt
Hbb-bs|Beta-s|Hbbt1|Hbbt2|-|7|7|protein-coding	2442.22	359.87	2687.95	441.22	-2.69181	1.96069e-127	1.17872e-123	Hbb-bs
Hbb-b1|AA409645|Hbb1|Hbbt1|Hbbt2|MommeD7|beta1|-|7 E3|7 54.85 cM|protein-coding	2429.65	358.91	2676.78	439.23	-2.69041	3.04402e-127	1.46399e-123	Hbb-b1
Btk|AI528679|xid|-|X E3|X 56.18 cM|protein-coding	2305.08	457.23	2286.81	573.69	-2.16809	1.94719e-89	7.80401e-86	Btk
Fgd2|Tcd-2|Tcd2|ZFYVE4|tcs-2|tcs2|-|17 15.26 cM|17 A3.3|protein-coding	1035.4	173.73	1141.08	207.16	-2.52701	2.43674e-76	8.37091e-73	Fgd2
Nfam1|4921501M20Rik|Cnaip|-|15|15 E2|protein-coding	586.27	74.46	618.01	74.7	-3.02196	1.13398e-74	3.40861e-71	Nfam1
Fcgr2b|AI528646|CD32|F630109E10Rik|Fc[g]RII|FcgRII|Fcgr2|Fcgr2a|Fcr-2|Fcr-3|Ly-17|Ly-m20|LyM-1|Lym-1|fcRII|-|1 H3|1 78.02 cM|protein-coding	620.55	43.91	511.9	39.84	-3.76062	4.9757e-73	1.32945e-69	Fcgr2b
Wdfy4|Gm18810|-|14|14 B|protein-coding	7645.51	2992.53	7466.32	3007.87	-1.34291	1.46121e-64	3.51377e-61	Wdfy4
Ncf2|NOXA2|Ncf-2|p67phox|-|1 G3|1 65.05 cM|protein-coding	1353.11	373.23	1289.06	390.43	-1.80082	8.5321e-58	1.86519e-54	Ncf2
Siglecf|Siglec5|mSiglec-F|-|7|7 B4|protein-coding	586.27	108.82	662.68	102.59	-2.57177	1.17104e-56	2.34667e-53	Siglecf
Gpx1|AI195024|AL033363|CGPx|GPx-1|GSHPx-1|Gpx|-|9 59.24 cM|9 F1|protein-coding	12678.5	5498.24	13866	5498.83	-1.28144	1.62785e-55	3.01114e-52	Gpx1
Cd163l1|B430307C05|E430002D04Rik|Scart1|-|7|7 F4|protein-coding	1975.95	4606.68	1945.23	4721.96	1.23993	6.67235e-54	1.14607e-50	Cd163l1
Cd33|Siglec-3|gp67|-|7 B4|7 28.25 cM|protein-coding	541.7	64.91	455.13	65.73	-2.93798	1.76321e-53	2.82666e-50	Cd33
Itgax|AI449405|Cd11c|Cr4|N418|-|7|7 F3|protein-coding	259.42	24.82	296.9	20.92	-3.60706	3.24077e-52	4.87067e-49	Itgax
Khdc1a|AU014713|C88118|Ndg1|-|1|1 A4|protein-coding	9150.61	3994.81	8841.01	4079.55	-1.16651	6.51458e-50	9.21507e-47	Khdc1a
Ccr2|Cc-ckr-2|Ccr2a|Ccr2b|Ckr2|Ckr2a|Ckr2b|Cmkbr2|mJe-r|-|9 75.05 cM|9 F|protein-coding	1365.68	3255.03	1222.98	3784.74	1.43215	3.81137e-49	5.09178e-46	Ccr2
Cd34|AU040960|-|1 H6|1 98.38 cM|protein-coding	2565.65	852.42	2211.42	877.46	-1.47553	5.07885e-46	6.42795e-43	Cd34
Zfp385a|Hzf|Zfp385|Znf385a|-|15|15 F3|protein-coding	2950.78	1341.15	2982.06	1333.62	-1.15947	4.67707e-43	5.62348e-40	Zfp385a
Khdc1c|Khdc1b|-|1|1 A4|protein-coding	4837.58	2200.25	4674.13	2246.94	-1.10728	5.43205e-43	6.22022e-40	Khdc1c
Serpine2|B230326M24Rik|PAI-1|PI-7|PI7|PN-1|Spi4|-|1 C4|1 40.97 cM|protein-coding	19.43	189.96	14.89	241.03	3.64395	9.13272e-41	9.98248e-38	Serpine2
Il12rb2|A930027I18Rik|IL-12RB2|Ifnm|-|6 C1|6 30.81 cM|protein-coding	1827.38	609.96	1573.87	598.59	-1.50195	1.0303e-40	1.0772e-37	Il12rb2
Zmat3|Wig1|-|3|3 B|protein-coding	169.14	612.82	157.29	693.2	1.99044	1.13184e-40	1.13405e-37	Zmat3
Flnb|AL024016|Fln-b|-|14|14 A1|protein-coding	6400.97	2921.89	5984.6	2674.22	-1.1554	5.52844e-38	5.3177e-35	Flnb
Cd180|F630107B15|Ly78|RP105|-|13|13 D1|protein-coding	133.71	5.73	163.81	10.96	-4.15972	8.43718e-38	7.80341e-35	Cd180
Alox5ap|Flap|-|5|5 G3|protein-coding	1957.66	679.64	2184.43	854.55	-1.44623	1.38272e-37	1.23149e-34	Alox5ap
Il2rb|CD122|IL-15Rbeta|IL15Rbeta|Il-2/15Rbeta|Il-2Rbeta|p70|-|15 37.52 cM|15 E|protein-coding	125.71	482.05	123.79	486.04	1.94567	7.04581e-36	6.05109e-33	Il2rb
Card11|0610008L17Rik|2410011D02Rik|BIMP3|CARMA1|-|5|5 G2|protein-coding	338.28	987.96	356.47	979.05	1.48987	1.08847e-35	9.02564e-33	Card11
Il31ra|CRL3|GLM-R|GPL|Glmr|NR10|-|13|13 D2.2|protein-coding	465.13	98.32	406.73	102.59	-2.12523	2.24595e-34	1.80028e-31	Il31ra
Spi1|Dis-1|Dis1|PU.1|Sfpi-1|Sfpi1|Spi-1|Tcfpu1|Tfpu.1|-|2 50.44 cM|2 E3|protein-coding	933.69	268.23	1022.87	347.6	-1.68149	2.37817e-33	1.84477e-30	Spi1
Cited4|MRG-2|Mrg2|-|4 D2.2|4 56.52 cM|protein-coding	35.43	217.64	40.95	256.96	2.61222	5.67478e-32	4.26442e-29	Cited4
Irf5|AW491843|mirf5|-|6 A3.3|6 12.36 cM|protein-coding	331.42	47.73	267.12	54.78	-2.55211	1.01656e-31	7.40762e-29	Irf5
Gpr174|Gm376|Lypsr3|-|X|X D|protein-coding	641.13	158.46	552.85	177.29	-1.83986	2.82998e-31	2.00154e-28	Gpr174
Upp1|AI325217|UPase|UdRPase|Up|Upp|-|11|11 A1-2|protein-coding	293.71	55.36	320.17	73.7	-2.26304	1.13586e-30	7.58723e-28	Upp1
Als2cl|79H19D|79H19E|BC022645|D930044G19Rik|mRn.49018|-|9 F3|9 60.79 cM|protein-coding	684.55	237.68	739.93	199.2	-1.71306	1.11837e-30	7.58723e-28	Als2cl
Fam129a|AI256368|AU019833|Niban|-|1|1 G2|protein-coding	371.42	915.42	347.16	954.15	1.37027	6.40812e-30	4.16476e-27	Fam129a
Ffar2|GPCR43|Gpr43|-|7|7 B1|protein-coding	445.7	107.86	554.72	134.46	-2.05946	1.82249e-29	1.1533e-26	Ffar2
Actn1|3110023F10Rik|Actn1a|-|12 C3|12 36.49 cM|protein-coding	5236.43	2935.26	5577.87	2783.78	-0.928757	1.42757e-28	8.80228e-26	Actn1
Pla2g4a|Pla2g4|cPLA2|cPLA2-alpha|cPLA2alpha|-|1 G1|1 63.51 cM|protein-coding	1156.54	378	1173.65	496	-1.42831	5.81982e-28	3.49873e-25	Pla2g4a
Siglecg|9830164H23|A630096C01Rik|Siglec-G|Siglec10|mSiglec-G|-|7|7 B4|protein-coding	67.43	0.95	75.39	2.99	-5.12089	7.31777e-28	4.18977e-25	Siglecg
Cd63|C75951|ME491|Tspan30|-|10 D3|10 77.19 cM|protein-coding	438.85	1077.69	474.67	1345.57	1.393	7.30089e-28	4.18977e-25	Cd63
Plek|2010300B13Rik|-|11 A2|11 9.41 cM|protein-coding	339.42	32.45	332.27	67.73	-2.76186	7.95304e-28	4.4476e-25	Plek
Klhl18|A930041K15|AW545966|-|9|9 F2|protein-coding	3365.62	1625.61	3054.66	1454.14	-1.06852	1.33073e-27	7.27276e-25	Klhl18
Tbxas1|CYP5|CYP5A1|THAS|TS|TXAS|TXS|-|6 17.85 cM|6 F1-pter|protein-coding	74.28	3.82	81.9	2.99	-4.47991	1.79095e-27	9.57047e-25	Tbxas1
Clec10a|CD301a|M-ASGP-BP-1|Mgl|Mgl1|-|11 B3|11 42.99 cM|protein-coding	64	1.91	79.11	1.99	-5.12691	2.40368e-27	1.25655e-24	Clec10a
Themis2|ICB-1|-|4|4 D2.3|protein-coding	620.55	205.23	569.61	187.24	-1.60787	4.25324e-27	2.17612e-24	Themis2
Zfp831|ENSMUSG00000050600|OTTMUSG00000017459|-|2|2 H4|protein-coding	401.13	104.05	416.97	66.73	-2.26307	4.49866e-27	2.25373e-24	Zfp831
Ncs1|9430075O15Rik|A730032G13Rik|AI836659|Freq|Mfreq|NCS-1|-|2|2 B|protein-coding	307.42	77.32	297.83	81.67	-1.93717	7.49367e-27	3.67756e-24	Ncs1
Cacnb2|AW060387|CAB2|Cavbeta2|Cchb2|-|2 A2|2 10.7 cM|protein-coding	329.13	95.46	344.37	76.69	-1.97425	1.0298e-26	4.95271e-24	Cacnb2
Haao|0610007K21Rik|0610012J07Rik|3-HAO|3-HAOxase|3HAO|-|17|17 E4|protein-coding	517.7	184.23	526.79	171.31	-1.56344	2.75982e-26	1.30128e-23	Haao
Pear1|3110045G13Rik|Jedi-1|Megf12|-|3|3 F1|protein-coding	84.57	447.69	131.23	558.75	2.19609	6.61496e-26	3.05904e-23	Pear1
Maf|2810401A20Rik|A230108G15Rik|AW047063|c-maf|-|8 E1|8 62.61 cM|protein-coding	101.71	396.14	111.69	565.72	2.15396	1.57584e-25	7.14984e-23	Maf
Cd81|Tapa-1|Tapa1|Tspan28|-|7 F5|7 88.1 cM|protein-coding	529.13	1315.38	645.93	1467.08	1.22898	1.67208e-25	7.446e-23	Cd81
Trat1|C030046M14Rik|Tcrim|Trim|-|16|16 B5|protein-coding	965.69	1916.75	947.48	1875.44	0.977363	2.28514e-25	9.99105e-23	Trat1
Cxcr5|Blr1|CXC-R5|CXCR-5|Gpcr6|MDR15|-|9 A5.2|9 24.84 cM|protein-coding	1934.81	3733.27	2061.57	3624.39	0.870164	3.31958e-25	1.42547e-22	Cxcr5
Bcl2l14|4930452K23Rik|4933405K19Rik|9030625M01Rik|AI429211|Bclg|-|6|6 G1|protein-coding	1404.53	669.14	1370.97	592.61	-1.14568	5.53458e-25	2.33491e-22	Bcl2l14
Pik3ap1|1810044J04Rik|BCAP|-|19|19 D1|protein-coding	189.71	23.86	198.25	43.82	-2.53376	1.20145e-24	4.98125e-22	Pik3ap1
Lsp1|Lsp-1|WP34|p50|pp52|-|7 F5|7 87.93 cM|protein-coding	1781.67	898.24	1841.92	753.96	-1.14109	1.34341e-24	5.47544e-22	Lsp1
Cd3e|AI504783|CD3|CD3epsilon|T3e|-|9 A5.2|9 24.84 cM|protein-coding	1397.68	708.28	1594.34	638.43	-1.16113	1.93649e-24	7.76114e-22	Cd3e
Krt80|1200016G03Rik|2310041I20Rik|Kb20|-|15|15 F3|protein-coding	113.14	14.32	147.06	18.92	-2.97877	3.33468e-24	1.31458e-21	Krt80
Colq|A130034K24Rik|-|14|14 B|protein-coding	740.55	1454.74	739	1510.91	0.992506	3.8117e-24	1.47839e-21	Colq
Tnni1|2700018B22Rik|AI747285|ssTnI|-|1 E4|1 59.28 cM|protein-coding	34.28	161.32	33.51	177.29	2.30651	2.85043e-23	1.088e-20	Tnni1
Gzma|AW494114|Ctla-3|Ctla3|Hf|SE1|TSP-1|TSP1|-|13 63.93 cM|13 D|protein-coding	23533.1	38542.1	23269.2	43676.9	0.80096	3.2916e-23	1.23677e-20	Gzma
Aqp9|1700020I22Rik|AI266899|AQP-9|-|9|9 D|protein-coding	547.41	211.91	537.03	189.24	-1.44257	1.6365e-22	6.05429e-20	Aqp9
Thbs1|TSP-1|TSP1|Thbs-1|tbsp1|-|2 59.34 cM|2 F1-F3|protein-coding	1434.25	2870.35	1460.32	2597.53	0.908432	2.44595e-22	8.89858e-20	Thbs1
Bbc3|PUMA|PUMA/JFY1|-|7|7 A2|protein-coding	50.28	248.18	74.46	282.86	2.06065	2.47933e-22	8.89858e-20	Bbc3
Nrxn2|6430591O13Rik|mKIAA0921|-|19 A|19|protein-coding	9.14	114.55	22.34	142.43	2.96057	2.75909e-22	9.75702e-20	Nrxn2
Blk|-|-|14 D1|14 33.25 cM|protein-coding	1343.96	2864.62	1493.82	2596.53	0.934516	6.37547e-22	2.2219e-19	Blk
Gapt|9830130M13Rik|-|13|13 D2.2|protein-coding	77.71	7.64	78.18	6.97	-3.40216	9.82019e-22	3.37352e-19	Gapt
Rab31|1700093E07Rik|AI415285|Rab22B|-|17|17 E1.1|protein-coding	1561.1	686.33	1850.29	857.54	-1.1573	1.01723e-21	3.44525e-19	Rab31
Fcgr3|CD16|-|1 H3|1 78.8 cM|protein-coding	106.28	17.18	99.59	10.96	-2.86167	1.03286e-21	3.4496e-19	Fcgr3
Adgre5|AA409984|Cd97|TM7LN1|-|8 C2|8 40.22 cM|protein-coding	826.26	1806.02	984.71	1830.62	0.993276	1.3819e-21	4.55213e-19	Adgre5
Rgs18|-|-|1 F|1 62.99 cM|protein-coding	577.13	187.09	600.32	243.02	-1.46637	1.9181e-21	6.23304e-19	Rgs18
Sestd1|1500031J16Rik|A930010O20|Solo/Trio8|-|2|2 C3|protein-coding	2553.07	1402.24	2472.95	1493.98	-0.806087	4.58354e-21	1.4696e-18	Sestd1
Cd3g|Ctg-3|Ctg3|T3g|-|9 A5.2|9 24.84 cM|protein-coding	12392.8	7691.81	12832.9	7180.05	-0.771739	1.11848e-20	3.53897e-18	Cd3g
Kcnk12|mntk1|-|17|17 E4|protein-coding	81.14	4.77	91.21	13.94	-3.21357	1.58057e-20	4.9361e-18	Kcnk12
Gfod1|9630032O13|AI850995|-|13|13 A4|protein-coding	1933.66	1040.47	1941.5	1137.41	-0.84267	2.78323e-20	8.58056e-18	Gfod1
Rab44|9830134C10Rik|-|17|17 A3.3|protein-coding	9138.04	5275.83	9626.55	5943.04	-0.753817	2.87213e-20	8.74255e-18	Rab44
Tox2|AI851523|AV026525|BI987407|Gcx1|RxHMG1|-|2 H3|2|protein-coding	50.28	277.78	40.02	200.19	2.40364	3.87549e-20	1.16492e-17	Tox2
Crim1|AU015004|-|17|17 E2-E3|protein-coding	835.41	1556.88	846.03	1552.74	0.876635	4.59167e-20	1.36316e-17	Crim1
Hmga2|9430083A20Rik|HMGI-C|Hmgic|pg|pygmy|-|10 D2|10 67.94 cM|protein-coding	50.28	186.14	54.91	228.08	1.95833	8.77992e-20	2.57476e-17	Hmga2
Phlda3|Tih1|-|1 E4|1 59.26 cM|protein-coding	59.43	252.96	79.11	356.56	2.11205	1.29368e-19	3.74808e-17	Phlda3
Adamts9|1810011L16Rik|8430403M15Rik|AW743315|E030027K14Rik|-|6|6 D1|protein-coding	309.71	940.24	325.76	745.99	1.39949	2.0638e-19	5.90812e-17	Adamts9
Slc27a6|4732438L20Rik|FACVL2|FATP6|VLCS-H1|-|18|18 D3|protein-coding	32	134.59	30.71	151.39	2.1756	3.00578e-19	8.40464e-17	Slc27a6
Ebi3|EBI-3|IL-27|-|17 D|17 29.08 cM|protein-coding	168	47.73	187.08	44.82	-1.94861	2.97922e-19	8.40464e-17	Ebi3
Mlkl|9130019I15Rik|-|8|8 D3|protein-coding	1322.25	650.05	1203.44	647.39	-0.970289	3.2835e-19	8.97253e-17	Mlkl
Myo5a|9630007J19Rik|AI413174|AI661011|Dbv|MVa|Myo5|MyoVA|Sev-1|d|d-120J|flail|flr|-|9 D|9 42.26 cM|protein-coding	3410.19	1915.79	3409.27	2162.28	-0.753545	3.25628e-19	8.97253e-17	Myo5a
Ephb2|Cek5|Drt|ETECK|Erk|Hek5|Nuk|Prkm5|Qek5|Sek3|Tyro5|-|4 69.0 cM|4 D-E|protein-coding	2907.35	1653.29	2830.35	1387.41	-0.924088	4.45689e-19	1.20421e-16	Ephb2
Dab2ip|2310011D08Rik|AI480459|Aip1|mKIAA1743|-|2|2 B|protein-coding	147.42	410.46	160.09	402.38	1.38918	4.75309e-19	1.26997e-16	Dab2ip
Csf2rb|AI848964|AIC2B|Bc|CDw131|Csf2rb1|Csfgmrb|Il3r|Il3rb|Il3rb1|Il5rb|-|15 E1|15 37.36 cM|protein-coding	638.84	254.87	577.98	214.14	-1.382	6.22892e-19	1.64601e-16	Csf2rb
Tnfrsf9|4-1BB|A930040I11Rik|AA408498|AI325004|CDw137|Cd137|ILA|Ly63|-|4 E2|4 81.52 cM|protein-coding	329.13	713.05	319.24	708.14	1.12273	7.30378e-19	1.90907e-16	Tnfrsf9
Tecpr1|2210010N04Rik|mKIAA1358|-|5|5 G2|protein-coding	1164.54	2267.07	1182.96	2031.81	0.863763	2.42368e-18	6.26692e-16	Tecpr1
Fam167a|A030013D21|-|14|14 D1|protein-coding	764.55	1451.88	774.37	1400.35	0.880181	2.46124e-18	6.29632e-16	Fam167a
Itk|Emt|Tcsk|Tsk|-|11 B1.1|11 27.75 cM|protein-coding	986.26	1721.06	863.72	1736	0.893301	2.71484e-18	6.87198e-16	Itk
Myo1e|2310020N23Rik|9130023P14Rik|AA407778|myosin-1e|myr 3|-|9 D|9 39.41 cM|protein-coding	133.71	356.05	133.09	350.59	1.39481	5.96713e-18	1.4947e-15	Myo1e
Ccnd1|AI327039|CycD1|Cyl-1|PRAD1|bcl-1|cD1|-|7 F5|7 88.92 cM|protein-coding	457.13	88.77	309	104.58	-1.99519	9.00227e-18	2.23173e-15	Ccnd1
Epha2|AW545284|Eck|Myk2|Sek-2|Sek2|-|4 73.67 cM|4 D-E|protein-coding	245.71	652.92	193.59	565.72	1.4679	9.62357e-18	2.36141e-15	Epha2
Bst1|114/A10|A530073F09|BP-3|Bp3|Bsta1|CD157|Ly65|-|5 B3|5 23.84 cM|protein-coding	189.71	56.32	177.77	37.85	-1.96489	2.786e-17	6.76717e-15	Bst1
Gimap8|Gm457|IAN9|IMAP8|-|6|6 B2.3|protein-coding	357.7	740.74	384.39	897.38	1.12819	2.9469e-17	7.08642e-15	Gimap8
Khdc1b|AU014713|AU015226|AU024076|AY238603|C85331|C86372|C88118|Khdc1|Khdc1c|-|1|1 A4|protein-coding	622.84	267.28	565.88	241.03	-1.23303	3.12997e-17	7.45211e-15	Khdc1b
Tgm2|G[a]h|TG2|TGase2|tTG|tTGas|-|2 H1|2 78.72 cM|protein-coding	2491.36	4648.69	2060.64	4075.57	0.930135	6.73621e-17	1.58809e-14	Tgm2
Slc37a3|2610507O21Rik|AU044904|-|6|6 B1|protein-coding	606.84	1190.33	483.05	1133.43	1.08548	1.16053e-16	2.70944e-14	Slc37a3
Rogdi|0610011C19Rik|AU020118|C76152|Lzf|-|16 A1|16 2.49 cM|protein-coding	530.27	237.68	546.34	186.25	-1.35134	1.5867e-16	3.66878e-14	Rogdi
Krba1|A930040G15Rik|AI448780|-|6|6 B2.3|protein-coding	349.7	834.28	351.82	720.1	1.13914	1.8741e-16	4.29205e-14	Krba1
Id2|AI255428|C78922|Idb2|bHLHb26|-|12 8.57 cM|12 B|protein-coding	692.55	1239.97	649.65	1215.1	0.862245	3.4533e-16	7.83411e-14	Id2
Lyl1|Lyl-1|bHLHa18|-|8 C3|8 41.02 cM|protein-coding	5210.15	3281.76	4993.37	3227.98	-0.65844	3.89215e-16	8.74714e-14	Lyl1
Lef1|3000002B05|AI451430|Lef-1|-|3 G3|3 60.78 cM|protein-coding	530.27	1126.38	634.76	1140.4	0.947036	4.59302e-16	1.02267e-13	Lef1
Tmtc2|8430438D04Rik|D330034A10Rik|-|10|10 D1|protein-coding	1225.11	678.69	1186.68	684.24	-0.833268	5.28566e-16	1.16609e-13	Tmtc2
Plxnb2|Debt|plexin-B2|-|15 E3|15 44.68 cM|protein-coding	142.85	352.23	146.12	473.09	1.49887	5.77534e-16	1.26254e-13	Plxnb2
Mpo|mKIAA4033|-|11 52.22 cM|11 C|protein-coding	381.7	10.5	715.73	53.78	-4.11461	6.56383e-16	1.42199e-13	Mpo
Lair1|5133400O11Rik|BB115266|D7Bwg0421e|Lair-1|-|7 A1|7 2.31 cM|protein-coding	1101.68	484.91	916.77	501.98	-1.0416	7.46116e-16	1.60195e-13	Lair1
Socs1|Cish1|Cish7|JAB|SOCS-1|SSI-1|-|16 A1|16 5.81 cM|protein-coding	2255.94	4283.09	2586.5	3953.06	0.75641	7.79627e-16	1.65909e-13	Socs1
Nipal1|3830408G10Rik|Npal1|-|5|5 C3.2|protein-coding	94.85	257.73	93.07	256.96	1.44329	7.92391e-16	1.67146e-13	Nipal1
Adamtsl3|9230119C12Rik|C130057K09|mKIAA1233|-|7|7 D3|protein-coding	50.28	161.32	44.68	163.34	1.76676	9.08454e-16	1.89962e-13	Adamtsl3
Neurl3|2010300P06Rik|Lincr|-|1|1 B|protein-coding	551.99	268.23	564.95	257.96	-1.09547	1.03958e-15	2.15507e-13	Neurl3
Syk|Sykb|-|13 27.41 cM|13 B-C2|protein-coding	4293.6	2776.8	4687.16	2963.05	-0.657055	1.38676e-15	2.85021e-13	Syk
Sorl1|2900010L19Rik|AI596264|AW261561|LR11|SorLA|gp250|mSorLA|-|9|9 B|protein-coding	454.84	195.68	428.14	159.36	-1.32053	2.06558e-15	4.2094e-13	Sorl1
Cd44|AU023126|AW121933|AW146109|HERMES|Ly-24|Pgp-1|-|2 E2|2 54.13 cM|protein-coding	1271.97	665.33	1312.33	780.85	-0.849947	2.13809e-15	4.32056e-13	Cd44
Mef2c|5430401D19Rik|9930028G15Rik|AV011172|Mef2|-|13 C3|13 43.68 cM|protein-coding	160	46.77	164.74	53.78	-1.70148	2.42496e-15	4.85942e-13	Mef2c
Podxl|AW121214|Ly102|PC|PCLP-1|Pclp1|-|6 A3.3|6 12.57 cM|protein-coding	1231.97	655.78	1387.72	769.9	-0.890708	2.49013e-15	4.94878e-13	Podxl
Sla|Slap|Slap-1|-|15 D2|15 29.3 cM|protein-coding	1482.25	907.78	1531.05	875.47	-0.766769	2.59253e-15	5.11004e-13	Sla
Gimap6|4833419H03Rik|Ian6|mFLJ00102|-|6|6 B2.3|protein-coding	761.12	1359.29	777.16	1327.65	0.794367	3.03427e-15	5.93212e-13	Gimap6
Hdac9|AV022454|D030072B18Rik|HD7B|HD9|HDRP|Hdac7b|Mitr|mKIAA0744|-|12|12 A3|protein-coding	259.42	520.23	215.93	605.56	1.23552	3.06946e-15	5.95253e-13	Hdac9
Serpina3g|2A2|AI119734|Spi2-1|Spi2/eb.1|Spi2A|spi2|-|12|12 E|protein-coding	2153.08	1379.33	2223.52	1240	-0.749622	4.19587e-15	8.07184e-13	Serpina3g
Ppm1h|A430075L18Rik|ARHCL1|C030002B11Rik|-|10|10 D2|protein-coding	1443.39	2547.71	1592.48	2430.2	0.702886	1.18811e-14	2.2675e-12	Ppm1h
1700048O20Rik|1700022O21Rik|-|9|9|ncRNA	419.42	783.69	437.44	845.59	0.914958	1.23095e-14	2.33076e-12	1700048O20Rik
Phactr2|AV158170|BC012871|-|10|10 A2|protein-coding	194.28	67.77	192.66	68.72	-1.51151	1.40662e-14	2.64258e-12	Phactr2
Smim5|2210020M01Rik|-|11|11 E2|protein-coding	114.28	30.55	123.79	34.86	-1.87408	1.53564e-14	2.8626e-12	Smim5
Card9|Gm782|-|2|2 A3|protein-coding	130.28	23.86	208.48	39.84	-2.4276	1.5583e-14	2.88249e-12	Card9
Rora|9530021D13Rik|Nr1f1|ROR1|ROR2|ROR3|nmf267|sg|staggerer|tmgc26|-|9 C|9 37.45 cM|protein-coding	73.14	200.46	76.32	262.94	1.61591	1.57674e-14	2.89433e-12	Rora
Slc8a1|AI852629|AV344025|D930008O12Rik|Ncx1|-|17 E3|17 51.29 cM|protein-coding	155.42	45.82	142.4	45.82	-1.70542	1.64068e-14	2.98891e-12	Slc8a1
Wfs1|AI481085|wolframin|-|5|5 B3|protein-coding	237.71	533.6	248.51	505.96	1.08541	1.99016e-14	3.59829e-12	Wfs1
Arnt2|Hif-2b|bHLHe1|mKIAA0307|-|7 D3|7 48.35 cM|protein-coding	1108.54	534.55	1242.53	681.25	-0.965216	2.07423e-14	3.72231e-12	Arnt2
Txk|A130089B16Rik|Btkl|PTK-RL-18|PTK4|Rlk|-|5 C3.2|5 38.44 cM|protein-coding	705.12	1263.83	677.57	1189.2	0.818226	2.55156e-14	4.545e-12	Txk
Gm16897|C030002c11rik|-|1|1 H6|ncRNA	230.85	61.09	189.87	75.69	-1.62873	3.08501e-14	5.4548e-12	Gm16897
Gbp6|AI595338|Mpa2l|-|5|5 E5|protein-coding	5045.58	7811.13	4529.87	7480.84	0.665592	3.65908e-14	6.42262e-12	Gbp6
Def8|AI449518|D8Ertd713e|DEF-8|-|8 E1|8 72.1 cM|protein-coding	2044.52	1270.51	1985.25	1126.46	-0.758039	4.88588e-14	8.51381e-12	Def8
Ckap4|5630400A09Rik|CLIMP-63|P63|-|10|10 C1|protein-coding	762.27	355.09	933.52	440.22	-1.10628	5.44828e-14	9.42552e-12	Ckap4
Met|AI838057|HGF|HGFR|Par4|c-Met|-|6 A2|6 7.83 cM|protein-coding	56	0.95	41.88	7.97	-3.44311	6.22871e-14	1.06466e-11	Met
Vim|-|-|2 10.04 cM|2 A2|protein-coding	8710.62	12929.5	8296.54	12908	0.592939	6.24263e-14	1.06466e-11	Vim
Itgam|CD11b/CD18|CR3|CR3A|Cd11b|F730045J24Rik|Ly-40|MAC1|Mac-1|Mac-1a|-|7|7 F4|protein-coding	50.28	4.77	69.8	10.96	-2.944	6.82021e-14	1.15497e-11	Itgam
Lst1|B144|-|17 B1|17 18.59 cM|protein-coding	176	64.91	240.13	64.74	-1.69528	7.52153e-14	1.26483e-11	Lst1
Npl|0610033B02Rik|-|1|1 G2|protein-coding	215.99	59.18	239.2	90.63	-1.61903	1.24436e-13	2.078e-11	Npl
Antxr2|2310046B19Rik|AW561899|CMG-2|CMG2|cI-35|-|5|5 E3|protein-coding	405.7	134.59	332.27	159.36	-1.3373	1.40166e-13	2.32453e-11	Antxr2
Ogfrl1|2210417C17Rik|-|1|1 A5|protein-coding	1403.39	885.83	1507.78	902.36	-0.7141	1.80795e-13	2.97779e-11	Ogfrl1
Acsf2|-|-|11|11 D|protein-coding	1724.53	2735.76	1652.05	2593.54	0.649134	2.23783e-13	3.66076e-11	Acsf2
9030619P08Rik|-|-|15|15 D3|pseudo	76.57	21.95	86.56	9.96	-2.34707	2.28196e-13	3.70773e-11	9030619P08Rik
Adssl1|AI528595|Adss|Adss1|-|12|12 F1|protein-coding	1235.4	688.23	1289.99	796.79	-0.778382	2.357e-13	3.80395e-11	Adssl1
Itgb3|CD61|GP3A|INGRB3|-|11 E1|11 67.84 cM|protein-coding	5685.56	3445.95	5737.03	4022.78	-0.625185	2.42506e-13	3.88769e-11	Itgb3
Itga2b|AI172977|CD41|CD41B|GpIIb|alphaIIb|-|11 E1|11 66.29 cM|protein-coding	3660.47	1701.97	4295.32	2425.22	-0.961229	2.82278e-13	4.49533e-11	Itga2b
Ahr|Ah|Ahh|Ahre|In|bHLHe76|-|12 A3|12 15.78 cM|protein-coding	1165.68	1762.11	1097.33	1901.33	0.684482	2.95779e-13	4.67576e-11	Ahr
5430427O19Rik|-|-|X|X B|protein-coding	378.28	176.59	397.42	188.24	-1.09955	2.97497e-13	4.67576e-11	5430427O19Rik
Slc15a1|D630032F02|PECT1|PEPT1|-|14|14 E5|protein-coding	404.56	966.01	316.45	759.94	1.25448	3.1709e-13	4.95133e-11	Slc15a1
Tgfb3|TGF-beta-3|Tgfb-3|-|12 D2|12 40.09 cM|protein-coding	28.57	100.23	30.71	143.42	2.01666	3.67036e-13	5.69427e-11	Tgfb3
Rag2|Rag-2|-|2 E2|2 53.87 cM|protein-coding	1391.96	803.74	1592.48	936.22	-0.791293	3.78001e-13	5.82679e-11	Rag2
Trp53inp1|2700057G22Rik|SIP|SIP18|SIP27|Stinp|Teap|-|4|4 A1-A2|protein-coding	1770.24	3083.21	2159.3	3595.5	0.752263	4.2448e-13	6.50157e-11	Trp53inp1
Fam102b|1600010D10Rik|B430201A12Rik|-|3|3 F3|protein-coding	2852.49	1821.29	3094.68	2043.76	-0.6337	4.32405e-13	6.58104e-11	Fam102b
Naaa|2210023K21Rik|3830414F09Rik|Asahl|-|5|5 E3|protein-coding	466.27	232.91	497.94	246.01	-1.02106	4.52175e-13	6.83864e-11	Naaa
Adam15|MDC15|metargidin|-|3 F1|3 39.07 cM|protein-coding	380.56	143.18	391.84	190.23	-1.2257	6.28511e-13	9.44613e-11	Adam15
Ak4|AK 4|Ak-3|Ak-4|Ak3|Ak3l1|D4Ertd274e|-|4 C6|4 46.84 cM|protein-coding	698.27	399.96	795.77	396.4	-0.918982	6.46256e-13	9.65249e-11	Ak4
Sema3c|1110036B02Rik|SemE|Semae|-|5|5 A3|protein-coding	269.71	78.27	230.82	104.58	-1.46315	6.67464e-13	9.90771e-11	Sema3c
Nab2|AI451907|-|10 D3|10 74.6 cM|protein-coding	454.84	801.83	403.94	804.76	0.895593	7.37356e-13	1.0878e-10	Nab2
Ptpn6|70Z-SHP|Hcph|PTPTY-42|Ptp1C|SH-PTP1|SHP-1|hcp|me|-|6 F2|6 59.17 cM|protein-coding	4399.88	2993.49	4731.84	3174.2	-0.577299	7.4416e-13	1.09115e-10	Ptpn6
Pim2|DXCch3|Pim-2|-|X A1.1|X 3.55 cM|protein-coding	169.14	392.32	160.09	353.57	1.17227	7.91669e-13	1.15377e-10	Pim2
Tox|1700007F02Rik|-|4|4 A1|protein-coding	1100.54	1691.47	1061.96	1753.93	0.661751	8.5571e-13	1.23959e-10	Tox
Lmo1|Rbtn-1|Rbtn1|Ttg1|-|7 E3|7 57.21 cM|protein-coding	132.57	50.59	162.88	43.82	-1.65593	1.06053e-12	1.5271e-10	Lmo1
Gcnt4|C2gnt3|Gm279|Gm73|-|13|13 D1|protein-coding	98.28	237.68	60.5	252.98	1.62991	1.46882e-12	2.10243e-10	Gcnt4
Slc27a1|FATP1|Fatp|-|8|8 B3.3|protein-coding	806.84	1375.51	860.93	1363.5	0.704649	1.59766e-12	2.27331e-10	Slc27a1
Cd300a|B230315M08Rik|Clm8|LMIR1|MAIR-I|MAIR-Ia|MMAC8|Pigr4|mcpir1|-|11 E2|11 80.54 cM|protein-coding	36.57	2.86	37.23	2.99	-3.61217	1.61868e-12	2.28967e-10	Cd300a
Card6|D730008L15|-|15|15 A1|protein-coding	195.42	396.14	186.15	402.38	1.0562	1.76853e-12	2.48701e-10	Card6
P2ry13|2010001L06Rik|GPCR1|GPR94|Gpr86|P2Y13|P2yr13|SP174|-|3|3 D|protein-coding	35.43	1.91	41.88	4.98	-3.47107	2.04107e-12	2.85358e-10	P2ry13
Gem|AV020497|-|4 A1|4 5.34 cM|protein-coding	294.85	1513.92	88.42	1104.55	2.76723	2.30275e-12	3.20082e-10	Gem
Creg1|AA755314|Creg|-|1|1 H2.3|protein-coding	2258.22	1439.47	2135.1	1438.2	-0.620273	2.33863e-12	3.23201e-10	Creg1
Faah|AW412498|-|4 D1|4 53.08 cM|protein-coding	454.84	912.56	559.37	983.04	0.887925	2.47233e-12	3.39727e-10	Faah
Pgr|9930019P03Rik|BB114106|ENSMUSG00000074510|NR3C3|PR|PR-A|PR-B|-|9|9 A1|protein-coding	345.13	1126.38	600.32	1348.56	1.37299	3.39412e-12	4.63741e-10	Pgr
2900026A02Rik|8430408O14Rik|A530094D01|AW539426|Gm449|Kiaa1671|mKIAA1671|-|5|5 F|protein-coding	1633.1	2508.57	1764.67	2663.26	0.594388	3.84242e-12	5.22026e-10	2900026A02Rik
Bcl11a|2810047E18Rik|BCL-11A|Ctip1|D930021L15Rik|Evi9|Evi9a|Evi9b|Evi9c|mKIAA1809|-|11|11 A3.2|protein-coding	780.55	316.91	1009.84	456.16	-1.22679	4.06037e-12	5.48537e-10	Bcl11a
Bcam|1200005K12Rik|B-CAM|Gplu|Lu|-|7|7 A3|protein-coding	56	190.91	50.26	146.41	1.66201	6.24342e-12	8.38746e-10	Bcam
Zfp36l1|AW742437|AW743212|Berg36|Brf1|D530020L18Rik|ERF1|TIS11b|cMG1|-|12|12 C3|protein-coding	766.84	1257.15	781.81	1253.94	0.686799	6.28378e-12	8.39478e-10	Zfp36l1
Nlrp10|6430548I20Rik|Nalp10|Napl10|PAN5|Pynod|-|7|7 E3|protein-coding	52.57	6.68	53.98	11.95	-2.51883	7.37785e-12	9.80194e-10	Nlrp10
Pld3|Sam-9|-|7|7 A3|protein-coding	903.98	1576.93	921.42	1427.24	0.709514	9.1591e-12	1.21016e-09	Pld3
Pkd2l1|B830002B15|BC046386|PCL|PKD2L|Pkdl|TRPP3|-|19 C3|19 36.91 cM|protein-coding	108.57	31.5	124.72	41.83	-1.68402	9.80473e-12	1.28838e-09	Pkd2l1
Rasa4|AA793972|AW112107|BB079060|CAPRI|GAPL|-|5|5 G2|protein-coding	1791.95	2909.49	2095.08	3161.25	0.63099	1.01952e-11	1.32522e-09	Rasa4
Shc4|6230417E10Rik|9930029B02Rik|Gm685|RaLP|-|2|2 F1|protein-coding	120	312.14	130.3	273.9	1.21565	1.01667e-11	1.32522e-09	Shc4
Sulf2|2010004N24Rik|AU020235|MSulf-2|mKIAA1247|-|2|2 H3|protein-coding	22.86	84.96	28.85	105.57	1.85164	1.1457e-11	1.48122e-09	Sulf2
Chst2|AI428561|AW121776|C130041E03Rik|Chts2|GST-2|GlcNAc6ST|Gn6st|-|9|9 E3.2-3.3|protein-coding	215.99	401.87	205.69	477.08	1.04821	1.19342e-11	1.53466e-09	Chst2
Efnb2|ELF-2|Epl5|Eplg5|Htk-L|LERK-5|Lerk5|NLERK-1|-|8 A1.1|8 3.42 cM|protein-coding	144	321.69	167.53	415.33	1.22463	1.55347e-11	1.98704e-09	Efnb2
Alcam|AI853494|BEN|CD166|DM-GRASP|MuSC|SC1|-|16|16 B5|protein-coding	258.28	120.27	270.84	118.52	-1.15783	1.59069e-11	2.02388e-09	Alcam
Dmwd|DMR-N9|Dm9|-|7 A3|7 9.46 cM|protein-coding	482.27	814.24	430	814.71	0.828259	1.66186e-11	2.1033e-09	Dmwd
Vamp8|AU041171|Edb|endobrevin|-|6 C1|6 32.27 cM|protein-coding	1773.67	1183.65	1843.78	1214.1	-0.604089	1.99166e-11	2.50751e-09	Vamp8
Dennd4a|AI115600|AI851943|F730015K02Rik|-|9|9 C|protein-coding	1900.52	1194.15	1835.4	1275.86	-0.60773	2.01102e-11	2.5187e-09	Dennd4a
Hck|AI849071|Bmk|-|2 H1|2 75.41 cM|protein-coding	24	1.91	34.44	1	-4.23242	2.16766e-11	2.70081e-09	Hck
Col9a3|AV006866|-|2 H4|2 103.14 cM|protein-coding	295.99	137.46	367.64	154.38	-1.19921	2.25772e-11	2.79853e-09	Col9a3
Chd7|A730019I05Rik|Cycn|Cyn|Dz|Edy|Flo|GENA 47|GENA 60|Gena 52|Lda|Mt|Obt|Todo|WBE1|Whi|metis|-|4 A1|4 3.68 cM|protein-coding	346.28	617.6	358.33	652.37	0.838119	2.77493e-11	3.42198e-09	Chd7
Scd1|AA589638|AI265570|Scd|Scd-1|ab|-|19 C3|19 37.98 cM|protein-coding	1703.95	1151.19	1743.26	1075.66	-0.639892	2.82523e-11	3.46624e-09	Scd1
Gata3|Gata-3|jal|-|2 A1|2 6.69 cM|protein-coding	2684.5	3794.36	2604.19	3897.29	0.529938	3.03836e-11	3.7088e-09	Gata3
S100a10|42C|AA409961|AL024248|CAL12|CLP11|Cal1l|p10|p11|-|3 40.51 cM|3 F1-F2|protein-coding	2021.66	2944.8	2045.75	3010.86	0.539518	3.07385e-11	3.73318e-09	S100a10
Scn5a|Nav1.5|Nav1.5c|SkM1|SkM2|mH1|-|9 F3-F4|9 71.33 cM|protein-coding	4.57	36.27	4.65	42.83	3.0532	3.5422e-11	4.28036e-09	Scn5a
Ric8|AI114950|RIC-8|Ric8a|-|7|7 F5|protein-coding	2485.65	3702.72	2369.64	3513.83	0.562357	4.71126e-11	5.66458e-09	Ric8
P2ry14|A330108O13Rik|Gpr105|P2Y14|-|3 D|3 28.96 cM|protein-coding	299.42	142.23	285.73	118.52	-1.17223	4.78948e-11	5.72998e-09	P2ry14
Lpcat2|A330042H22|Aytl1|Aytl1a|lpafat1|-|8|8 C5|protein-coding	502.84	242.46	443.03	238.04	-0.984959	4.89866e-11	5.83159e-09	Lpcat2
Arap3|Centd3|Drag1|E030006K04Rik|cnt-d3|-|18|18 B3|protein-coding	67.43	164.18	68.87	239.04	1.54762	5.24143e-11	6.2089e-09	Arap3
Sh3bgrl2|A930014C21Rik|AA408038|B930089I21|-|9|9 E2|protein-coding	37.71	102.14	35.37	141.43	1.72221	5.79059e-11	6.8258e-09	Sh3bgrl2
Tmprss3|-|-|17|17 A3.3|protein-coding	172.57	54.41	171.25	76.69	-1.40386	6.07867e-11	7.13043e-09	Tmprss3
Il17rb|Evi27|IL-17ER|IL-17Rh1|IL17RH1|Il17br|-|14 B|14 18.39 cM|protein-coding	2766.78	3829.68	2725.18	4126.36	0.523592	6.12882e-11	7.14052e-09	Il17rb
Cd3d|T3d|-|9 A5.2|9 24.84 cM|protein-coding	1741.67	1180.79	2057.85	1235.02	-0.664876	6.14666e-11	7.14052e-09	Cd3d
Man1a|Man1a1|PCR1|-|10|10 B3|protein-coding	1447.96	2410.25	1631.57	2310.68	0.605637	6.29564e-11	7.27842e-09	Man1a
Procr|AI325044|Ccca|Ccd41|Epcr|-|2|2 H1-3|protein-coding	65.14	15.27	63.29	14.94	-2.08704	6.34688e-11	7.30256e-09	Procr
Irf2bpl|6430527G18Rik|Eap1|-|12|12 D2|protein-coding	1492.53	2436.98	1464.97	2172.24	0.631437	6.65135e-11	7.61643e-09	Irf2bpl
Arl4c|A630084M22Rik|Arl7|LAK|-|1|1 D|protein-coding	3246.77	4704.05	3317.13	4720.96	0.511511	6.81251e-11	7.764e-09	Arl4c
Ndrg2|AI182517|AU040374|Ndr2|SYLD|-|14|14 C2|protein-coding	523.41	295.91	535.17	269.91	-0.912644	7.13062e-11	8.0882e-09	Ndrg2
Gfra1|AU042498|-|19 54.18 cM|19 D2-D3|protein-coding	2395.36	3605.36	2316.59	3385.35	0.55978	7.65415e-11	8.64128e-09	Gfra1
Gimap5|D630024P16|E230026N22Rik|-|6|6 B2.3|protein-coding	810.26	1401.29	760.41	1238.01	0.740787	7.75666e-11	8.71609e-09	Gimap5
Dnmt3b|MmuIIIB|-|2|2 A2-A3|protein-coding	9525.46	6530.11	9146.29	6715.92	-0.506025	8.10316e-11	9.0631e-09	Dnmt3b
Bex6|B020003O03Rik|-|16|16 B2|protein-coding	266.28	123.14	256.88	119.52	-1.11641	8.42272e-11	9.37691e-09	Bex6
Polm|AI462166|B230309I03Rik|Tdt-N|-|11|11 A1|protein-coding	206.85	432.41	158.22	389.43	1.16721	1.10285e-10	1.22213e-08	Polm
Pmvk|1110011E12Rik|2900002L22Rik|AV001327|PMK|PMKA|PMKASE|-|3|3 F1|protein-coding	541.7	279.68	585.43	328.67	-0.902633	1.11051e-10	1.22497e-08	Pmvk
Bhlhe40|Bhlhb2|C130042M06Rik|CR8|Clast5|Dec1|Sharp2|Stra13|Stra14|-|6|6 E-F1|protein-coding	1157.68	721.64	1130.84	590.62	-0.809821	1.35527e-10	1.48137e-08	Bhlhe40
Ak1|Ak-1|B430205N08Rik|-|2 B|2 22.09 cM|protein-coding	38.86	118.36	50.26	165.33	1.64342	1.355e-10	1.48137e-08	Ak1
Ltb|AI662801|LTbeta|Tnfc|Tnfsf3|p33|-|17 B1|17 18.59 cM|protein-coding	1337.11	2200.25	1394.24	2003.92	0.612735	1.38783e-10	1.5101e-08	Ltb
Gbp10|-|-|5|5 E5|protein-coding	3009.06	4512.18	2564.16	4192.1	0.6341	1.58729e-10	1.71935e-08	Gbp10
Pik3r6|BB220380|p84|p84 PIKAP|p87(PIKAP)|p87PIKAP|-|11|11 B3|protein-coding	75.43	19.09	81.9	25.9	-1.81757	1.86525e-10	2.01137e-08	Pik3r6
Xdh|XO|Xor|Xox-1|Xox1|-|17 E2|17 45.25 cM|protein-coding	270.85	493.51	253.16	486.04	0.894096	1.98139e-10	2.12707e-08	Xdh
Psrc1|5430413I02Rik|AL033312|Dda3|-|3|3 F3|protein-coding	318.85	595.64	369.5	675.28	0.869805	2.01966e-10	2.15852e-08	Psrc1
Csf2rb2|AIC2A|BetaIl3|Bil3|Csfgmrb|Il3r|Il3rb|Il3rb2|-|15 E1|15 37.22 cM|protein-coding	185.14	63.96	144.26	47.81	-1.5592	2.05864e-10	2.19045e-08	Csf2rb2
Sytl2|AI266830|Slp2|mKIAA1597|-|7|7 E1|protein-coding	398.85	709.23	375.08	665.32	0.820459	2.07471e-10	2.19782e-08	Sytl2
Arhgap32|3426406O18Rik|Gc-gap|Grit|Px-rics|Rics|mKIAA0712|p200Rhogap|p250Gap|-|9|9 A4|protein-coding	2974.78	1976.88	3018.36	2200.13	-0.532496	2.09793e-10	2.21267e-08	Arhgap32
Spta1|AF093576|AI451697|Spna-1|Spna1|ha|ihj|nmf4|sph|-|1 H3|1 80.97 cM|protein-coding	24	0.95	24.2	1	-4.47067	2.34581e-10	2.46331e-08	Spta1
Cdk18|AA682070|Ctk18|Pctk3|-|1|1 E4|protein-coding	223.99	89.73	282.94	117.53	-1.30635	2.50006e-10	2.61386e-08	Cdk18
Ralb|5730472O18Rik|-|1|1 E2|protein-coding	620.55	347.46	690.6	395.41	-0.832577	2.52356e-10	2.62702e-08	Ralb
Tmem243|4930420K17Rik|E030031F02Rik|-|5|5 A1|protein-coding	404.56	681.55	375.08	679.26	0.794969	2.57441e-10	2.66035e-08	Tmem243
Arhgef40|E130112L23Rik|Gm669|Solo|-|14|14 C2|protein-coding	357.7	158.46	395.56	204.18	-1.06897	2.57771e-10	2.66035e-08	Arhgef40
Tmem108|AI462967|B130017P16Rik|R74726|-|9|9 F1|protein-coding	569.13	306.41	545.41	321.7	-0.83725	2.65288e-10	2.72623e-08	Tmem108
Ctsw|lymphopain|-|19|19 A|protein-coding	181.71	444.82	244.78	455.16	1.06033	2.67487e-10	2.73713e-08	Ctsw
Plk2|Snk|-|13|13 D2.1|protein-coding	8	54.41	16.75	60.76	2.15406	2.90206e-10	2.95702e-08	Plk2
Itm2c|3110038L02Rik|BRI3|Bricd2c|E25|E25C|ITM3|-|1|1 C5|protein-coding	1759.95	2739.57	1976.87	2774.81	0.550101	3.03028e-10	3.07465e-08	Itm2c
Gk|D930012N15Rik|Gyk|-|X 39.32 cM|X C-D|protein-coding	965.69	535.51	881.4	583.65	-0.733127	3.27674e-10	3.2969e-08	Gk
Aldh1b1|2700007F14Rik|-|4|4 B2|protein-coding	1862.81	1342.1	2226.31	1237.01	-0.674693	3.27615e-10	3.2969e-08	Aldh1b1
Rab11fip5|9130206P09Rik|C75969|D6Ertd32e|GAF1|RIP11|-|6 C3|6 37.35 cM|protein-coding	108.57	28.64	150.78	47.81	-1.78141	3.41865e-10	3.42534e-08	Rab11fip5
Arhgap6|AI504284|RhoGAPX-1|-|X|X F5|protein-coding	530.27	168.96	656.17	288.84	-1.39081	3.65141e-10	3.64338e-08	Arhgap6
Adrbk2|4833444A01Rik|AI851927|AW551196|Adrbk-2|Bark-2|GRK3|-|5 F|5 55.29 cM|protein-coding	425.13	137.46	499.8	228.08	-1.35611	3.83051e-10	3.80629e-08	Adrbk2
Etv5|1110005E01Rik|8430401F14Rik|ERM|-|16|16 B1|protein-coding	1382.82	2387.34	1031.25	2032.8	0.865137	4.11322e-10	4.07039e-08	Etv5
Gimap7|IAN7|Ian3|-|6|6 B2.3|protein-coding	237.71	480.14	239.2	435.24	0.931394	4.2312e-10	4.16998e-08	Gimap7
Cd247|4930549J05Rik|A430104F18Rik|AW552088|Cd3|Cd3-eta|Cd3-zeta|Cd3h|Cd3z|Cd3zeta|T3z|Tcrk|Tcrz|-|1 73.14 cM|1 G-H|protein-coding	2011.37	2984.89	1965.7	2828.59	0.538251	4.34616e-10	4.2658e-08	Cd247
Fam212b|6530418L21Rik|-|3|3 F2.2|protein-coding	77.71	178.5	75.39	286.84	1.58709	4.39463e-10	4.29584e-08	Fam212b
Tspan13|1100001I23Rik|NET-6|Tm4sf13|-|12|12 B2|protein-coding	16453.3	26130	17197.1	23424.5	0.549478	4.47607e-10	4.35773e-08	Tspan13
Relt|E430021K24Rik|Tnfrsf19l|-|7|7 E3|protein-coding	1243.4	762.69	1128.98	719.1	-0.6876	5.08792e-10	4.93344e-08	Relt
Lpgat1|AI649174|AW112037|BC013667|-|1|1 H6|protein-coding	2612.5	1769.75	2668.41	1939.18	-0.521282	5.41485e-10	5.22936e-08	Lpgat1
Adgra3|3830613O22Rik|AU044632|Gpr125|Tem5-like|-|5|5 B3|protein-coding	1375.96	939.28	1510.58	973.08	-0.605384	6.39753e-10	6.15366e-08	Adgra3
Cyth1|CLM1|CTH-1|CYTIP|Pscd1|mKIAA4240|-|11|11 E2|protein-coding	1723.38	2591.62	1913.58	2716.05	0.533672	7.82709e-10	7.46897e-08	Cyth1
Rab19|-|-|6|6 B1|protein-coding	297.13	673.92	199.18	538.83	1.2854	7.81625e-10	7.46897e-08	Rab19
Nlrc4|9530011P19Rik|CLAN|CLAN1|CLANA|CLANB|CLANC|CLAND|Card12|IPAF|-|17|17 E2|protein-coding	85.71	25.77	91.21	31.87	-1.62866	8.14921e-10	7.74561e-08	Nlrc4
Lpxn|4933402K05Rik|A530083L21Rik|AV278559|LDPL|-|19|19 A|protein-coding	828.55	1243.79	765.06	1249.96	0.636882	8.57845e-10	8.08965e-08	Lpxn
Kifc3|AI325457|BB123200|-|8 D1|8 47.12 cM|protein-coding	122.28	351.28	166.6	309.75	1.17777	8.54792e-10	8.08965e-08	Kifc3
Id3|Hlh462|Idb3|bHLHb25|-|4 D3|4 68.34 cM|protein-coding	311.99	683.46	400.21	656.35	0.897768	9.27878e-10	8.71589e-08	Id3
Arhgef10l|2810441C07Rik|-|4|4 D3|protein-coding	397.7	164.18	379.74	218.12	-1.03685	9.55924e-10	8.9444e-08	Arhgef10l
Cd5|Ly-1|Ly-12|Ly-A|Lyt-1|-|19 A|19 7.16 cM|protein-coding	561.13	292.09	521.21	210.15	-1.11289	9.72306e-10	9.06242e-08	Cd5
Ccr5|AM4-7|CD195|Cmkbr5|-|9 F|9 75.05 cM|protein-coding	252.56	476.32	180.56	461.14	1.10981	1.02052e-09	9.47507e-08	Ccr5
Ankrd27|AA408090|BC016493|D330003H11Rik|Varp|-|7|7 B2|protein-coding	4203.32	2890.39	4292.53	3202.09	-0.491335	1.2109e-09	1.11994e-07	Ankrd27
Mllt6|AI315037|Af17|-|11 D|11 61.05 cM|protein-coding	3105.06	4357.55	2924.36	4250.86	0.503962	1.29039e-09	1.18889e-07	Mllt6
Vash1|AI834978|D930046M13Rik|G630009D10Rik|-|12|12 D2|protein-coding	1449.1	964.1	1390.51	919.29	-0.601561	1.31647e-09	1.20828e-07	Vash1
Skap1|1700091G21Rik|Scap1|Skap-55|-|11|11 D|protein-coding	668.55	1267.65	515.62	1023.87	0.946537	1.34518e-09	1.22994e-07	Skap1
Tyrobp|DAP12|KARAP|Ly83|-|7 17.45 cM|7 B|protein-coding	455.99	184.23	518.42	270.91	-1.11384	1.74374e-09	1.58832e-07	Tyrobp
Nr2f6|AV090102|COUP-TF3|EAR2|Erbal2|-|8 B3.3|8 34.43 cM|protein-coding	599.98	987.01	688.74	1132.43	0.703819	1.76629e-09	1.60279e-07	Nr2f6
Prkcd|AI385711|D14Ertd420e|PKC[d]|PKCdelta|Pkcd|-|14 B|14 18.82 cM|protein-coding	3561.05	2505.71	3393.45	2455.1	-0.497238	2.03406e-09	1.83884e-07	Prkcd
Col15a1|-|-|4|4 B1-B3|protein-coding	3012.49	4751.78	3023.01	4174.17	0.555793	2.04802e-09	1.84453e-07	Col15a1
Tgm1|2310004J08Rik|Tgase1|-|14|14 C1|protein-coding	262.85	126	303.42	148.4	-1.05932	2.06081e-09	1.84912e-07	Tgm1
Slc9a2|2210416H12Rik|4932415O19Rik|AV333884|NHE2|-|1 B|1 19.66 cM|protein-coding	332.56	663.42	282.01	550.78	0.976776	2.23436e-09	1.99104e-07	Slc9a2
March1|2900024D24Rik|BB085186|-|8|8 B3.1-B3.2|protein-coding	57.14	17.18	73.53	18.92	-1.86823	2.23555e-09	1.99104e-07	March1
Adgrl1|2900070I05Rik|AI182398|CLIBA|Lec2|Lphn1|mKIAA0821|-|8|8 C3|protein-coding	1113.11	1860.43	1353.28	1971.05	0.622935	2.38601e-09	2.11721e-07	Adgrl1
D630045J12Rik|Kiaa1549|mKIAA1549|-|6|6 B1|protein-coding	637.7	370.37	604.98	367.52	-0.7611	2.40035e-09	2.1221e-07	D630045J12Rik
Unc13b|Munc13-1|Munc13-2|Unc13a|Unc13h1|Unc13h2|-|4|4 B1|protein-coding	32	102.14	44.68	114.54	1.46862	2.45973e-09	2.16664e-07	Unc13b
Gm15663|9330159K06|OTTMUSG00000025047|-|10|10 D1|ncRNA	179.42	87.82	190.8	78.68	-1.16163	2.61605e-09	2.29592e-07	Gm15663
Epcam|CD326|EGP|EGP-2|Egp314|Ep-CAM|EpCAM1|GA733-2|Ly74|TROP1|Tacsd1|Tacstd1|gp40|-|17|17 E4|protein-coding	1623.96	2541.98	1502.2	2233	0.602894	2.70095e-09	2.36181e-07	Epcam
Shisa5|2310008D10Rik|6430628I05Rik|Scotin|mShisa5|-|9|9 F2|protein-coding	3446.76	4928.37	3428.81	4735.9	0.481381	2.82989e-09	2.46559e-07	Shisa5
Ptpn13|AI324989|PTP-BL|PTPL1|Ptpri|RIP|-|5 50.43 cM|5 E-F|protein-coding	8	51.55	15.82	52.79	2.07033	2.88397e-09	2.50364e-07	Ptpn13
Wnt5b|AW545702|Wnt-5b|-|6 F1|6 56.86 cM|protein-coding	45.71	109.77	44.68	128.48	1.38509	3.16649e-09	2.73902e-07	Wnt5b
Plxnd1|6230425C21Rik|b2b1863Clo|b2b553Clo|-|6|6 E3|protein-coding	2269.65	1626.56	2379.88	1686.2	-0.500021	3.19328e-09	2.75228e-07	Plxnd1
Lrba|C80285|D3Ertd775e|Lab300|Lba|-|3|3 F1|protein-coding	2393.08	1648.52	2354.75	1739.98	-0.497426	3.295e-09	2.82982e-07	Lrba
Lhfpl2|6030465B15|AI447312|AW050335|mKIAA0206|vgim|-|13|13 D1|protein-coding	65.14	13.36	75.39	25.9	-1.85671	3.65359e-09	3.12662e-07	Lhfpl2
Flot2|AI573412|Esa|reggie-2|-|11 B5|11 46.74 cM|protein-coding	158.85	357	206.62	381.46	0.996968	3.94054e-09	3.36022e-07	Flot2
Gbp8|5830443L24Rik|mGBP8|-|5|5 E5|protein-coding	1438.82	2135.34	1635.29	2477.01	0.572298	4.53609e-09	3.8544e-07	Gbp8
Ramp3|AI850306|-|11 A1|11 4.61 cM|protein-coding	172.57	396.14	141.47	310.75	1.16701	4.63583e-09	3.92527e-07	Ramp3
Sema4c|AI426163|M-Sema F|Semacl1|Semaf|Semai|sema I|-|1|1 B|protein-coding	326.85	578.46	313.66	542.81	0.799275	4.94989e-09	4.17649e-07	Sema4c
Vegfc|AW228853|VEGF-C|-|8|8 B3|protein-coding	58.28	131.73	53.05	139.44	1.27616	5.00675e-09	4.20969e-07	Vegfc
Galnt12|9130206E10|A630062B03Rik|-|4|4 B1|protein-coding	1119.97	1596.97	1062.89	1619.47	0.549499	5.22819e-09	4.38057e-07	Galnt12
Dscam|4932410A21Rik|-|16 57.02 cM|16 C|protein-coding	10.29	43.91	11.17	52.79	2.14208	5.41464e-09	4.50539e-07	Dscam
Vat1l|9430073I07|AI427515|mKIAA1576|-|8|8 E1|protein-coding	457.13	256.78	679.43	268.92	-1.12462	5.41143e-09	4.50539e-07	Vat1l
Ar|AW320017|Tfm|-|X C3|X 42.82 cM|protein-coding	45.71	110.73	49.33	157.37	1.47622	5.4997e-09	4.56039e-07	Ar
Timp2|D11Bwg1104e|Timp-2|-|11 E2|11 83.09 cM|protein-coding	921.12	1589.33	1173.65	1833.61	0.694709	5.71837e-09	4.72542e-07	Timp2
Fam71b|Gari-l3|OTTMUSG00000005491|-|11 B1.1|11|protein-coding	11.43	52.5	15.82	56.77	1.96374	5.75405e-09	4.73862e-07	Fam71b
Serpinb1a|1190005M04Rik|AI325983|EI|EIA|ELANH2|LEI|M/NEI|MNEI|PI2|-|13 13.75 cM|13 A4|protein-coding	2822.78	2025.57	2826.63	2073.64	-0.473299	5.85495e-09	4.80525e-07	Serpinb1a
Nhsl2|1110062M06Rik|6430511F03|AI225852|AW488865|EG621083|ENSMUSG00000073037|Gm10456|-|X|X D|protein-coding	1053.69	663.42	990.3	536.84	-0.77515	6.10675e-09	4.99487e-07	Nhsl2
Heatr5a|C230081H03Rik|D930036F22Rik|mKIAA1316|-|12|12 C1|protein-coding	2788.5	1989.29	2926.22	2145.35	-0.478339	7.92229e-09	6.45787e-07	Heatr5a
Atp1b1|Atp4b|Atpb|Atpb-1|NKbeta1|-|1 H2.2|1 71.75 cM|protein-coding	293.71	504.01	318.31	566.71	0.793309	8.09313e-09	6.57485e-07	Atp1b1
Fcer1g|AI573376|CD23|FcR-gamma|FcR[g]|FcRgamma|Fce1g|FcepsilonRI|Ly-50|-|1 H3|1 79.23 cM|protein-coding	1305.11	1819.38	1321.64	1971.05	0.517701	8.18205e-09	6.6247e-07	Fcer1g
Slc25a12|2610002D09Rik|AI839531|B230107K20Rik|BB129864|-|2|2 C2|protein-coding	4703.87	3593.9	5165.56	3548.69	-0.476752	8.42321e-09	6.79708e-07	Slc25a12
Rgs9bp|R9AP|Rgs9-1bp|-|7|7 B2|protein-coding	122.28	38.18	122.86	56.77	-1.38158	8.82698e-09	7.0988e-07	Rgs9bp
Vamp5|AF119384|Camp|-|6|6 C1|protein-coding	1084.54	730.23	1282.55	786.83	-0.654153	8.88568e-09	7.0988e-07	Vamp5
Lztfl1|5530402H04Rik|6130400H19Rik|AI414725|AW048545|-|9 74.36 cM|9 F|protein-coding	196.57	330.28	173.12	410.35	0.992195	8.87232e-09	7.0988e-07	Lztfl1
Ltbr|AI256028|CD18|LTbetaR|Ltar|TNF-R-III|TNFCR|TNFR-RP|TNFR2-RP|TNFRrp|Tnfbr|Tnfrsf3|-|6 F3|6 59.32 cM|protein-coding	295.99	147	267.12	139.44	-0.981979	8.95669e-09	7.13184e-07	Ltbr
Tmc8|EVIN2|Ever2|mFLJ00400|-|11|11 E2|protein-coding	794.26	1272.42	824.63	1198.17	0.599847	8.98708e-09	7.13242e-07	Tmc8
Man1c1|AI593348|-|4|4 D3|protein-coding	196.57	365.59	223.38	434.25	0.913755	9.06519e-09	7.17075e-07	Man1c1
Chpf|1700028N03Rik|AI414328|D1Bwg1363e|-|1 C4|1 39.14 cM|protein-coding	51.43	128.86	62.36	199.2	1.50404	9.29171e-09	7.32583e-07	Chpf
Prkag2|2410051C13Rik|AAKG|AAKG2|AI854673|H91620p|WPWS|-|5|5 A3|protein-coding	1363.39	958.37	1443.56	975.07	-0.548742	9.71975e-09	7.63827e-07	Prkag2
Ms4a4b|AI463180|Chandra|Ly116|-|19|19 A|protein-coding	133.71	258.68	107.96	249	1.06732	9.85094e-09	7.71614e-07	Ms4a4b
Dclk2|6330415M09Rik|AU044875|CL2|CLICK2|Click-II|Dcamkl2|-|3|3 F1|protein-coding	124.57	262.5	141.47	265.93	0.975073	1.01323e-08	7.91075e-07	Dclk2
Slc9a9|5730527A11Rik|9930105B05|AI854429|Nhe9|-|9|9 E3.3|protein-coding	1190.83	1701.02	1152.24	1704.13	0.52946	1.06153e-08	8.26101e-07	Slc9a9
Camk2a|CaMKII|R74975|mKIAA0968|-|18 E1|18 34.41 cM|protein-coding	3490.19	2409.3	4352.1	2778.8	-0.608087	1.06978e-08	8.29842e-07	Camk2a
Ablim1|2210411C18Rik|2610209L21Rik|4833406P10Rik|9330196J19Rik|AV079770|AW060987|AW215784|Limab1|mKIAA0059|-|19 D2|19 52.09 cM|protein-coding	5404.43	7596.35	5616.03	7513.7	0.445094	1.10448e-08	8.53998e-07	Ablim1
Heyl|Hey3|Hrt3|bHLHb33|hesr3|-|4|4 D2.2|protein-coding	18.29	73.5	19.55	58.76	1.78876	1.13897e-08	8.77849e-07	Heyl
Nckap1|C79304|H19|Hem-2|Hem2|Nap1|mKIAA0587|mh19|p125Nap1|-|2 C3|2 48.21 cM|protein-coding	163.42	305.46	168.46	318.71	0.899287	1.14982e-08	8.83378e-07	Nckap1
Adamts10|9430006O18|AW045948|Adam-ts10|Adamts-10|Znmp|-|17|17 B1|protein-coding	1660.53	2330.07	1797.24	2637.37	0.510239	1.2992e-08	9.94967e-07	Adamts10
Gbp4|AW228052|Mag-2|Mpa-2|Mpa2|mKIAA4245|-|5 E5|5 50.68 cM|protein-coding	3246.77	4541.77	2954.14	4298.67	0.502258	1.4084e-08	1.07517e-06	Gbp4
Itsn2|AI327390|Ese2|Sh3d1B|Sh3p18|mKIAA1256|-|12|12 A1.1|protein-coding	3397.62	2382.57	3510.72	2654.3	-0.467538	1.49937e-08	1.14099e-06	Itsn2
Lpar6|2610302I02Rik|P2ry5|P2y5|-|14|14 D3|protein-coding	599.98	924.01	644.07	1011.92	0.625408	1.51368e-08	1.14825e-06	Lpar6
Trib2|AW319517|TRB-2|TRB2|-|12|12 A1.1|protein-coding	45.71	126	63.29	184.26	1.48158	1.52077e-08	1.15e-06	Trib2
Aldoa|Aldo-1|Aldo1|-|7|7 F4|protein-coding	13403.1	10091.6	13537.5	9945.9	-0.437234	1.52946e-08	1.15294e-06	Aldoa
Fads3|AI464531|-|19|19 B|protein-coding	575.98	855.28	561.23	925.27	0.636055	1.56934e-08	1.17931e-06	Fads3
Fam84b|BF642811|D330050I23Rik|-|15|15 D1|protein-coding	2121.09	1427.06	2150.92	1611.5	-0.503366	1.60742e-08	1.20416e-06	Fam84b
Fbxo30|1700026A16Rik|MUSA1|-|10|10 A2|protein-coding	713.12	1146.42	838.59	1299.76	0.642904	1.62881e-08	1.2164e-06	Fbxo30
Atp6v0a1|AA959968|ATP6a1|Atp6n1|Atp6n1a|Atpv0a1|Vpp-1|Vpp1|-|11 D|11 64.04 cM|protein-coding	742.84	365.59	584.5	369.51	-0.860884	1.69675e-08	1.26321e-06	Atp6v0a1
Sh2b2|Aps|-|5|5 G1|protein-coding	305.13	140.32	281.08	164.34	-0.954364	1.70367e-08	1.26445e-06	Sh2b2
Lgals3|GBP|L-34|Mac-2|gal3|-|14|14 C1|protein-coding	43.43	117.41	52.12	229.08	1.83312	1.84606e-08	1.36592e-06	Lgals3
Gbp11|EG634650|Gm7141|-|5|5 E5|protein-coding	647.98	1003.24	623.59	966.1	0.621978	1.9522e-08	1.44002e-06	Gbp11
Ly6d|Ly-61|Ly61|Thb|-|15 D3|15 34.27 cM|protein-coding	499.42	1138.78	428.14	774.88	1.04002	2.11059e-08	1.55209e-06	Ly6d
Tmem131|2610524E03Rik|CC28|D1Bwg0491e|Neg|RW1|YR-23|mKIAA0257|-|1 B|1 15.42 cM|protein-coding	6408.97	4715.5	6157.72	4455.04	-0.464153	2.14455e-08	1.57226e-06	Tmem131
Dmpk|DM|DMK|Dm15|MDPK|MT-PK|-|7 A3|7 9.46 cM|protein-coding	38.86	85.91	29.78	108.56	1.49898	2.2003e-08	1.60823e-06	Dmpk
Onecut2|C730009D12|OC-2|Oc2|-|18|18 E1|protein-coding	124.57	32.45	121.93	57.77	-1.46485	2.24783e-08	1.63799e-06	Onecut2
Skil|Skir|SnoN|sno|-|3 A3|3 15.12 cM|protein-coding	409.13	629.05	356.47	655.36	0.738318	2.5576e-08	1.85808e-06	Skil
Gmpr|2310004P21Rik|AV028449|GMPR 1|-|13|13 A5|protein-coding	541.7	332.19	618.01	359.55	-0.758108	2.66447e-08	1.9299e-06	Gmpr
Lrrk2|4921513O20Rik|9330188B09Rik|AW561911|D630001M17Rik|Gm927|cI-46|-|15|15 F1|protein-coding	85.71	36.27	87.49	22.91	-1.54934	2.73008e-08	1.97148e-06	Lrrk2
Asns|-|-|6|6 A1|protein-coding	467.42	218.59	363.92	201.19	-0.992057	2.84286e-08	2.04677e-06	Asns
Eif2ak4|2610011M03|GCN2|MGCN2|-|2|2 E5|protein-coding	1277.68	871.51	1263	882.44	-0.544786	3.02409e-08	2.17076e-06	Eif2ak4
Eng|AI528660|AI662476|CD105|Endo|S-endoglin|-|2 B|2 22.09 cM|protein-coding	324.56	687.28	464.43	893.4	0.985631	3.06051e-08	2.19036e-06	Eng
Igf2r|AI661837|CD222|CI-MPR|M6P/IGF2R|Mpr300|-|17 8.64 cM|17 A-C|protein-coding	161.14	415.23	250.37	489.03	1.11685	3.31492e-08	2.3654e-06	Igf2r
Fam174b|-|-|7|7|protein-coding	69.71	205.23	113.55	274.89	1.36384	3.44461e-08	2.45066e-06	Fam174b
Mgst2|GST2|MGST-II|-|3|3 C|protein-coding	643.41	1048.1	724.11	1048.77	0.604634	3.49466e-08	2.47894e-06	Mgst2
Icos|AILIM|CCLP|CRP-1|H4|Ly115|-|1 C2|1 30.6 cM|protein-coding	97.14	188.05	93.07	296.8	1.33401	3.52824e-08	2.4954e-06	Icos
Nuak1|AU014801|AW494241|B230104P22Rik|Omphk1|-|10|10 C1|protein-coding	73.14	16.23	78.18	31.87	-1.66959	3.54139e-08	2.49736e-06	Nuak1
Xkr7|AY534253|-|2|2 H1|protein-coding	13.71	0.95	21.41	0	-4.88077	3.57153e-08	2.51125e-06	Xkr7
Pld4|AI132321|thss|-|12|12 F1|protein-coding	2633.07	2048.48	3076.07	1934.2	-0.529454	3.78667e-08	2.65475e-06	Pld4
Rcbtb2|2610028E02Rik|2810420M18Rik|AI448345|AW240694|Chc1l|RC/BTB2|-|14|14 D3|protein-coding	1333.68	2027.48	1304.88	1832.61	0.540067	3.83412e-08	2.6802e-06	Rcbtb2
Tspan5|2810455A09Rik|4930505M03Rik|NET-4|Tm4sf9|-|3|3 H1|protein-coding	783.98	503.05	794.84	525.88	-0.628498	3.96922e-08	2.7666e-06	Tspan5
Rdh10|3110069K09Rik|4921506A21Rik|AI875664|AW549993|D1Ertd762e|m366Asp|-|1 A3|1 4.94 cM|protein-coding	641.13	1074.83	718.52	1024.87	0.615647	4.0514e-08	2.81572e-06	Rdh10
Cd82|AA682076|AL023070|C33|IA4|Kai1|Tspan27|-|2 E1|2 51.62 cM|protein-coding	2670.79	3795.31	2472.95	3499.89	0.495117	4.27414e-08	2.96196e-06	Cd82
Mafb|Kreisler|Krml|Krml1|kr|-|2 H2|2 80.92 cM|protein-coding	65.14	186.14	102.38	217.12	1.24137	4.48187e-08	3.097e-06	Mafb
Edem2|9530090G24Rik|AI327354|-|2|2 H1|protein-coding	2843.35	2128.66	2874.1	2076.63	-0.453153	4.51664e-08	3.11208e-06	Edem2
Ptger3|EP3|Pgerep3|Ptgerep3|-|3 H4|3 81.32 cM|protein-coding	225.14	115.5	223.38	116.53	-0.960017	4.59226e-08	3.15515e-06	Ptger3
Cdc25b|AI604853|-|2 F1|2 63.29 cM|protein-coding	2541.65	3814.4	2501.8	3383.36	0.504365	4.7922e-08	3.28314e-06	Cdc25b
Stat3|1110034C02Rik|AW109958|Aprf|-|11 D|11 63.82 cM|protein-coding	8356.35	6406.98	8856.84	6520.71	-0.423552	4.89875e-08	3.3466e-06	Stat3
Fam65a|2310066E14Rik|AI837433|-|8|8 D3|protein-coding	8163.21	6192.2	8091.78	5887.26	-0.438046	5.39347e-08	3.67413e-06	Fam65a
Sstr2|SRIF-1|SS2R|SSTR-2|Smstr-2|Smstr2|sst2|-|11 E2|11 79.05 cM|protein-coding	798.84	1113.01	735.28	1184.22	0.572702	5.83693e-08	3.96499e-06	Sstr2
Traf3ip2|AI429613|Act1|CIKS|-|10|10 B1|protein-coding	385.13	684.42	316.45	588.63	0.853933	6.01073e-08	4.07155e-06	Traf3ip2
Mob3b|8430436F23Rik|A430018A01Rik|Mobkl2b|-|4 A5|4 16.86 cM|protein-coding	118.85	57.27	148.92	57.77	-1.23287	6.27901e-08	4.24133e-06	Mob3b
Kcnk6|D7Ertd764e|Toss|Twik2|-|7 B1|7 16.94 cM|protein-coding	112	50.59	107.96	36.85	-1.33285	6.4944e-08	4.37453e-06	Kcnk6
Arrdc4|2410003C09Rik|AV216361|-|7|7 D1|protein-coding	18.29	53.46	19.55	73.7	1.72474	6.67e-08	4.48027e-06	Arrdc4
Pdxk|2310036D04Rik|AA119688|C77999|-|10 C1|10 39.72 cM|protein-coding	2396.51	1654.24	2169.53	1597.56	-0.499042	7.26448e-08	4.86598e-06	Pdxk
Fam129b|9130404D14Rik|-|2|2 B|protein-coding	599.98	356.05	640.34	412.34	-0.703545	7.37285e-08	4.92486e-06	Fam129b
Fasl|APT1LG1|CD178|CD95-L|CD95L|Fas-L|Faslg|Tnfsf6|gld|-|1 H2.1|1 69.95 cM|protein-coding	67.43	11.45	66.08	27.89	-1.77765	7.65197e-08	5.08307e-06	Fasl
Rgl1|Rgl|mKIAA0959|-|1|1 G2|protein-coding	30.86	97.36	38.16	86.65	1.39298	7.64303e-08	5.08307e-06	Rgl1
Naip5|Birc1e|Lgn1|Naip-rs3|-|13 D1|13 53.05 cM|protein-coding	255.99	468.69	309	529.86	0.805856	7.80242e-08	5.16873e-06	Naip5
Stxbp5|0710001E20Rik|4930565N16Rik|AW742610|LGL3|mKIAA1006|-|10|10 A2|protein-coding	4596.45	3426.85	4723.46	3600.48	-0.418299	7.85767e-08	5.19102e-06	Stxbp5
Hnf4a|HNF-4|Hnf4|Hnf4alpha|MODY1|Nr2a1|TCF-14|Tcf14|-|2 H3|2 84.32 cM|protein-coding	134.85	54.41	176.84	75.69	-1.27826	8.47321e-08	5.58233e-06	Hnf4a
5830411N06Rik|Scart2|-|7|7 F4|protein-coding	5377	8180.54	4774.65	6920.1	0.564441	9.00378e-08	5.91568e-06	5830411N06Rik
Shank1|-|-|7|7 B4|protein-coding	42.28	108.82	53.05	120.51	1.24263	9.44456e-08	6.18837e-06	Shank1
Ccl9|CCF18|MRP-2|Scya10|Scya9|-|11 C|11 50.81 cM|protein-coding	34.28	4.77	27.92	6.97	-2.38654	1.11996e-07	7.31838e-06	Ccl9
Dennd5a|1500012B19Rik|AJ245569|AW496491|ORF37|Rab6ip1|mKIAA1091|-|7|7 F1|protein-coding	1097.11	729.28	1246.25	836.63	-0.594467	1.14133e-07	7.43783e-06	Dennd5a
Nfe2|NF-E2|NF-E2/P45|p45|p45NFE2|p45nf-e2|-|15 F3|15 58.62 cM|protein-coding	2844.49	1957.79	3375.76	2338.57	-0.546534	1.18828e-07	7.72283e-06	Nfe2
Plekhg5|BC023181|Syx|-|4|4 E2|protein-coding	483.42	755.05	526.79	816.71	0.62492	1.20065e-07	7.78223e-06	Plekhg5
Slc23a2|AI844736|NBTL1|SVCT2|Slc23a1|YSPL2|YSPL3|mKIAA0238|-|2|2 G2|protein-coding	1419.39	872.46	1186.68	825.67	-0.626458	1.24556e-07	8.05163e-06	Slc23a2
Klhl23|C130068N17Rik|-|2|2 C2|protein-coding	567.98	297.82	540.75	364.53	-0.755261	1.24988e-07	8.05786e-06	Klhl23
Gm10409|EG666890|ENSMUSG00000072740|Gm8348|-|14|14 A1|pseudo	82.28	33.41	105.17	39.84	-1.37226	1.37205e-07	8.82185e-06	Gm10409
Fsd1l|A230072O16Rik|Ccdc10|Csdufd1|Fsd1nl|OTTMUSG00000007002|-|4|4 B2|protein-coding	134.85	312.14	195.45	380.47	1.04803	1.41281e-07	9.0597e-06	Fsd1l
Slc16a3|Mct3|Mct4|-|11|11 E2|protein-coding	76.57	29.59	99.59	36.85	-1.42399	1.4426e-07	9.22613e-06	Slc16a3
Socs3|Cis3|Cish3|EF-10|Ef10|SSI-3|Ssi3|-|11|11 E2|protein-coding	657.13	1199.88	855.34	1212.11	0.660443	1.60058e-07	1.02094e-05	Socs3
Endod1|2210414F18Rik|2310067E08Rik|C85344|-|9|9 A3|protein-coding	2012.52	1342.1	1909.86	1491.98	-0.480069	1.66207e-07	1.05735e-05	Endod1
Dtx3|Deltex3|mg310|-|10|10 D3|protein-coding	1473.1	1963.52	1393.3	2018.86	0.464375	1.70893e-07	1.08429e-05	Dtx3
Bpifb4|Gm1006|Lplunc4|-|2|2 H1|protein-coding	40	161.32	79.11	163.34	1.41611	1.72815e-07	1.0936e-05	Bpifb4
Galnt3|-|-|2|2 C3|protein-coding	356.56	531.69	329.48	597.59	0.708898	1.81042e-07	1.14266e-05	Galnt3
Adgre1|DD7A5-7|EGF-TM7|Emr1|F4/80|Gpf480|Ly71|TM7LN3|-|17 D|17 29.8 cM|protein-coding	46.86	10.5	28.85	1.99	-2.55339	1.82008e-07	1.14574e-05	Adgre1
Trp53cor1|Gm16197|OTTMUSG00000031656|linc-p21|lincRNA-p21|-|17 A3.3|17 15.04 cM|ncRNA	9.14	39.14	15.82	65.73	2.01545	1.82835e-07	1.14794e-05	Trp53cor1
Enah|Mena|NDPP-1|Ndpp1|WBP8|-|1 H5|1 84.93 cM|protein-coding	475.42	309.28	527.72	300.79	-0.728528	1.85961e-07	1.16453e-05	Enah
Prtn3|PR3|mPR3|-|10 C1|10 39.72 cM|protein-coding	16	0	29.78	3.98	-3.50221	1.86942e-07	1.16764e-05	Prtn3
Tlr12|Gm1365|Tlr11|-|4|4 D2.2|protein-coding	1090.26	1639.93	1177.37	1588.59	0.498971	1.95014e-07	1.2149e-05	Tlr12
Prkd2|AI325941|PKD2|-|7|7 A2|protein-coding	2478.79	3810.59	2147.2	3178.18	0.587383	2.00971e-07	1.24877e-05	Prkd2
Ywhag|14-3-3gamma|D7Bwg1348e|-|5|5 G2|protein-coding	8835.19	6694.3	9668.43	7230.84	-0.421286	2.02953e-07	1.25477e-05	Ywhag
Itgb7|Ly69|-|15 F3|15 57.39 cM|protein-coding	3187.34	4283.09	3237.08	4301.65	0.407794	2.02979e-07	1.25477e-05	Itgb7
Rcsd1|A430105K13Rik|BC025872|-|1|1 H2.3|protein-coding	9194.04	12533.3	8900.58	11900	0.423526	2.07501e-07	1.27943e-05	Rcsd1
Bdh1|2310032J20Rik|AI327223|Bdh|-|16|16 B2|protein-coding	3855.9	2909.49	3735.02	2677.2	-0.451477	2.09908e-07	1.29096e-05	Bdh1
E2f2|E2F-2|-|4|4 D3|protein-coding	1423.96	2180.2	1402.61	1908.31	0.524007	2.16091e-07	1.3256e-05	E2f2
Zyx|9530098H06Rik|R75157|-|6|6 B2.1|protein-coding	2922.21	4222.95	2893.64	3823.58	0.459325	2.18166e-07	1.33492e-05	Zyx
Nt5e|2210401F01Rik|AI447961|CD73|NT|Nt5|eNT|-|9|9 E3.2|protein-coding	239.99	380.87	171.25	428.27	0.970372	2.2245e-07	1.35768e-05	Nt5e
Grina|1110025J15Rik|Lag|Tmbim3|-|15|15 E1|protein-coding	780.55	1133.06	781.81	1131.44	0.525243	2.35748e-07	1.4352e-05	Grina
Il27ra|CRL1|IL-27R|Tccr|WSX-1|Wsx1|zcytor1|-|8|8 C3|protein-coding	554.27	859.1	559.37	830.65	0.591572	2.39897e-07	1.45677e-05	Il27ra
Sox5|A730017D01Rik|AI528773|-|6 G3|6 76.14 cM|protein-coding	85.71	156.55	82.84	203.18	1.08051	2.45357e-07	1.48617e-05	Sox5
Zdhhc14|B530001K09Rik|New1cp|-|17|17 A1|protein-coding	333.71	587.05	395.56	607.55	0.698013	2.47114e-07	1.49236e-05	Zdhhc14
Cdh1|AA960649|ARC-1|E-cad|Ecad|L-CAM|UVO|Um|-|8 53.18 cM|8 D|protein-coding	2283.37	1680.02	2180.7	1490.99	-0.50198	2.47619e-07	1.49236e-05	Cdh1
Prcp|2510048K03Rik|2610104A14Rik|AI451719|HUMPCP|PCP|-|7|7 E2|protein-coding	874.26	547.91	899.09	634.44	-0.59709	2.55423e-07	1.53554e-05	Prcp
Ncald|AI848120|D030020D09Rik|D15Ertd412e|-|15 B3.1|15 14.94 cM|protein-coding	11.43	38.18	13.03	57.77	1.93838	2.63767e-07	1.58175e-05	Ncald
Dgka|80kDa|AW146112|Dagk1|-|10 D3|10 77.14 cM|protein-coding	1969.09	2597.35	1955.47	2695.13	0.420757	2.71726e-07	1.62542e-05	Dgka
Gimap4|AU019574|E430007K16Rik|Ian-1|Ian1|Imap4|-|6|6 B2.3|protein-coding	186.28	407.6	128.44	307.76	1.18284	2.73229e-07	1.63036e-05	Gimap4
Svip|1700006C13Rik|6620401M08Rik|-|7|7 B4|protein-coding	106.28	40.09	94.93	44.82	-1.25014	2.75028e-07	1.63703e-05	Svip
Cx3cr1|-|-|9|9 F4|protein-coding	182.85	298.78	177.77	347.6	0.830291	2.85062e-07	1.69256e-05	Cx3cr1
Pmepa1|2210418I02Rik|AW455466|Erg1.2|N4wbp4|Stag1|Tmepai|-|2|2 H3|protein-coding	506.27	832.37	421.62	726.07	0.741744	2.97553e-07	1.76238e-05	Pmepa1
Tmem121|2410008J05Rik|Hole|-|12|12 F1|protein-coding	2788.5	4030.13	2987.65	3821.59	0.432991	3.0534e-07	1.80406e-05	Tmem121
Dtx1|Fxit1|mKIAA4160|-|5 F|5 60.64 cM|protein-coding	3429.62	5641.42	4520.56	6324.5	0.57834	3.15947e-07	1.86215e-05	Dtx1
Hspbap1|3830421G21Rik|-|16|16 B3|protein-coding	14.86	44.86	12.1	48.8	1.78919	3.24684e-07	1.90773e-05	Hspbap1
Ikzf3|5830411O07Rik|Aiolos|Zfpn1a3|Znfn1a3|-|11|11 D|protein-coding	3.43	31.5	6.52	25.9	2.45345	3.25267e-07	1.90773e-05	Ikzf3
Etv4|AW414408|Pea-3|Pea3|-|11 D|11 65.48 cM|protein-coding	91.43	168	73.53	171.31	1.03759	3.30144e-07	1.93162e-05	Etv4
Gdpd5|BC024955|Gde2|-|7|7 E2|protein-coding	43.43	89.73	26.99	94.62	1.39673	3.4698e-07	2.0252e-05	Gdpd5
Gm16712|-|-|17|17 29.08 cM|ncRNA	110.85	54.41	110.76	38.84	-1.25182	3.4842e-07	2.02868e-05	Gm16712
Idi1|4832416K17Rik|-|13|13 A1|protein-coding	6335.83	4533.18	6419.25	5123.34	-0.41333	3.50816e-07	2.0377e-05	Idi1
Clec12a|CLL-1|D230024O04|KLRL1|Micl|-|6|6 F3|protein-coding	1046.83	1428.97	1016.36	1472.06	0.481498	3.53554e-07	2.04866e-05	Clec12a
Ets1|AI196000|AI448617|D230050P06|Ets-1|Tpl1|-|9 A4|9 17.97 cM|protein-coding	6558.68	9285.92	7409.55	9575.39	0.422636	3.86184e-07	2.23235e-05	Ets1
Abcb1b|Abcb1|Mdr1|Mdr1b|Pgy-1|Pgy1|mdr|-|5 A1|5 3.43 cM|protein-coding	628.55	320.73	537.96	378.47	-0.749019	3.91797e-07	2.25936e-05	Abcb1b
Idh1|AI314845|AI788952|E030024J03Rik|Id-1|Idh-1|Idpc|-|1 C2|1 32.91 cM|protein-coding	694.84	434.32	774.37	510.94	-0.649536	4.08322e-07	2.34902e-05	Idh1
Srl|9830004M20Rik|AW108387|sar|-|16|16 A1|protein-coding	642.27	393.28	585.43	390.43	-0.656263	4.38326e-07	2.51561e-05	Srl
Lrrc32|AI426318|D11S833Eh|D7H11S833E|EG434215|Garp|-|7 E2|7 53.86 cM|protein-coding	51.43	147.96	51.19	106.57	1.303	4.45048e-07	2.54811e-05	Lrrc32
Nfil3|AV225605|E4BP4|-|13 B1|13 27.68 cM|protein-coding	396.56	628.1	396.49	610.54	0.6334	4.65412e-07	2.65838e-05	Nfil3
9030617O03Rik|-|-|12|12 E|protein-coding	362.28	555.55	370.43	597.59	0.642591	4.72284e-07	2.69124e-05	9030617O03Rik
Ccng1|AI314029|-|11|11 B1.1|protein-coding	1706.24	2184.98	1709.75	2789.75	0.528975	4.85189e-07	2.75823e-05	Ccng1
Idh2|E430004F23|IDPm|Idh-2|-|7 D3|7 45.43 cM|protein-coding	7707.22	6140.66	8050.82	5778.7	-0.412329	4.90529e-07	2.78202e-05	Idh2
Brca2|Fancd1|RAB163|-|5 G3|5 89.52 cM|protein-coding	2354.22	1687.65	2160.23	1606.52	-0.463837	4.96219e-07	2.80766e-05	Brca2
Cyp51|AI426508|CYPLI|Cyp51a1|Ldm|P450-14DM|P450LI|-|5 2.3 cM|5 A2|protein-coding	5882.13	4199.09	5274.45	4093.49	-0.43802	5.04642e-07	2.84862e-05	Cyp51
4930429B21Rik|-|-|3|3 A3|ncRNA	2.29	15.27	2.79	32.87	3.15145	5.1586e-07	2.90513e-05	4930429B21Rik
Cdc42ep4|1500041M20Rik|Borg4|CEP4|-|11|11 E2|protein-coding	265.14	111.68	331.34	170.31	-1.09772	5.19772e-07	2.91351e-05	Cdc42ep4
Havcr2|TIM-3|Tim3|Timd3|-|11|11 B1.1|protein-coding	807.98	1266.7	671.06	1088.61	0.66441	5.18775e-07	2.91351e-05	Havcr2
Endou|Pp11r|Tcl-30|-|15 F1|15 53.7 cM|protein-coding	2829.64	4201.95	2685.16	3613.43	0.494649	5.21173e-07	2.91457e-05	Endou
Zfp365|AI839779|AV340892|DBZ|Su48|Znf365|talanin|-|10|10 B5.1|protein-coding	26.29	80.18	16.75	56.77	1.68042	5.41755e-07	3.02264e-05	Zfp365
Slc29a3|4933435C21Rik|AW987637|Ent3|-|10|10 B4|protein-coding	1351.96	968.87	1329.08	961.12	-0.484079	5.4854e-07	3.05341e-05	Slc29a3
Rilpl1|2900002H16Rik|6330559I19Rik|GOSPEL|-|5|5 F|protein-coding	234.28	415.23	197.31	364.53	0.848219	5.64674e-07	3.13596e-05	Rilpl1
Klf2|Lklf|-|8|8 C1|protein-coding	70.86	137.46	67.94	149.4	1.03686	5.73778e-07	3.17918e-05	Klf2
Cd300lb|CLM-7|Clm7|Gm253|LMIR5|-|11|11 E2|protein-coding	9.14	41.05	17.68	56.77	1.80771	5.77761e-07	3.19389e-05	Cd300lb
Kbtbd11|2900016B01Rik|4930465M17Rik|mKIAA0711|-|8|8 A1.1-2|protein-coding	15982.4	20983	16886.2	22241.3	0.384185	5.85684e-07	3.23026e-05	Kbtbd11
Arfgef3|9630004D11|B930094H20Rik|BIG3|D10Bwg1379e|mKIAA1244|-|10 A3|10 7.79 cM|protein-coding	152	70.64	147.99	78.68	-1.01595	5.97356e-07	3.27959e-05	Arfgef3
Cyp4f18|1810054N16Rik|Cyp4f3|Cypf18|-|8|8 C1|protein-coding	40	6.68	36.3	12.95	-1.96007	5.96872e-07	3.27959e-05	Cyp4f18
Map3k8|Cot|Cot/Tpl2|Est|Estf|Tpl-2|Tpl2|c-COT|-|18 A1|18 2.73 cM|protein-coding	510.84	815.19	522.14	759.94	0.598929	6.08462e-07	3.33296e-05	Map3k8
Mgmt|AGT|AI267024|Agat|-|7 F4|7 82.07 cM|protein-coding	10.29	43.91	18.61	54.78	1.71796	6.45915e-07	3.53007e-05	Mgmt
Evl|AI528774|-|12|12 F2|protein-coding	2483.36	3694.13	2273.78	3144.32	0.515444	6.59815e-07	3.59786e-05	Evl
Uaca|2700059D02Rik|nucling|-|9|9 C|protein-coding	215.99	130.77	241.99	98.6	-1.00496	6.76647e-07	3.6813e-05	Uaca
Mgl2|CD301b|-|11|11 B3|protein-coding	21.71	5.73	26.06	1	-2.78118	6.83081e-07	3.70791e-05	Mgl2
Snph|6430515A01|AW045671|AW556958|AW743098|mKIAA0374|-|2|2 G3|protein-coding	20.57	2.86	15.82	0	-3.52617	7.4789e-07	4.05056e-05	Snph
Poll|1110003P06Rik|AV007317|-|19|19 C3|protein-coding	1337.11	1021.37	1433.33	939.21	-0.508465	7.50137e-07	4.0536e-05	Poll
Fgf11|Fgf-11|Fhf-3|Fhf3|-|11|11 B4|protein-coding	42.28	8.59	60.5	19.92	-1.87247	7.54669e-07	4.06895e-05	Fgf11
Myo6|BC029719|Tlc|sv|-|9 E1|9 43.98 cM|protein-coding	58.28	130.77	70.74	142.43	1.06186	7.60634e-07	4.09194e-05	Myo6
Fabp5|E-FABP|Fabpe|Klbp|PA-FABP|mal1|-|3|3 A1-A3|protein-coding	2077.66	1483.38	1907.07	1423.26	-0.464345	7.69979e-07	4.13296e-05	Fabp5
Snx33|E130307J07Rik|Sh3px3|-|9|9 B|protein-coding	122.28	237.68	135.89	235.05	0.85878	7.85324e-07	4.20594e-05	Snx33
5730559C18Rik|1700034M08Rik|4933426C09Rik|AI586180|D1Mgi54|-|1|1 F|protein-coding	246.85	121.23	294.11	161.35	-0.952694	8.10868e-07	4.3331e-05	5730559C18Rik
B3gnt7|C330001H22Rik|beta-3GnT7|-|1|1 D|protein-coding	81.14	36.27	80.04	29.88	-1.28823	8.16417e-07	4.35307e-05	B3gnt7
Plac8|C15|D5Wsu111e|-|5 48.49 cM|5 E3|protein-coding	19125.2	14304	17709	13012.5	-0.440711	8.1972e-07	4.36102e-05	Plac8
Adamts6|5031426K13|A930019D11Rik|ADAM-TS6|b2b1879.1Clo|b2b2029Clo|b2b2182Clo|b2b2187.1Clo|b2b2228Clo|-|13|13 D1|protein-coding	399.99	625.23	404.87	615.52	0.614129	8.2437e-07	4.37607e-05	Adamts6
Tlr9|-|-|9|9 F1|protein-coding	29.71	4.77	25.13	5.98	-2.32971	8.50298e-07	4.50377e-05	Tlr9
Ddx25|AW047046|GRTH|-|9|9 A3-A5|protein-coding	13.71	0	13.96	1	-4.52046	9.23625e-07	4.88141e-05	Ddx25
Epas1|HIF-2alpha|HIF2A|HLF|HRF|MOP2|bHLHe73|-|17|17 E4|protein-coding	120	273.96	175.91	470.1	1.30862	1.03371e-06	5.45124e-05	Epas1
Sh3kbp1|1200007H22Rik|1700125L08Rik|5830464D22Rik|AI447724|IN85|Ruk|Seta|-|X|X F4|protein-coding	1604.53	2444.62	1848.43	2342.55	0.460665	1.0589e-06	5.57184e-05	Sh3kbp1
Itpr1|D6Pas2|ENSMUSG00000072853|Gm10429|IP3R1|InsP3R|Ip3r|Itpr-1|P400|Pcp-1|Pcp1|opt|wblo|-|6 E1-E2|6 49.74 cM|protein-coding	2822.78	2021.75	2540.9	1940.18	-0.446401	1.08556e-06	5.69969e-05	Itpr1
Tmem38a|1110001E17Rik|AI413399|TRIC-A|mg33a|-|8|8 B3.3|protein-coding	67.43	153.68	76.32	141.43	1.02275	1.09971e-06	5.74884e-05	Tmem38a
Bcar3|AI131758|AND-34|-|3|3 G3|protein-coding	24	73.5	28.85	65.73	1.37547	1.09746e-06	5.74884e-05	Bcar3
Fdps|6030492I17Rik|AI256750|Fdpsl1|mKIAA1293|-|3 F1|3 39.01 cM|protein-coding	5129	4009.13	5205.58	3988.92	-0.38002	1.12016e-06	5.83387e-05	Fdps
Slc16a7|4921534N07Rik|Mct2|-|10|10 D3|protein-coding	255.99	138.41	225.24	105.57	-0.983826	1.12083e-06	5.83387e-05	Slc16a7
Nccrp1|1190020J12Rik|Gm163|NCCRP-1|-|7|7 A3|protein-coding	24	4.77	31.64	6.97	-2.24764	1.19611e-06	6.21226e-05	Nccrp1
Tnfsf11|Ly109l|ODF|OPG|OPGL|RANKL|Trance|-|14 D3|14 41.26 cM|protein-coding	1933.66	2890.39	1583.17	2427.21	0.58877	1.22711e-06	6.35953e-05	Tnfsf11
Dnase2a|Dnase2|-|8 C3|8 41.31 cM|protein-coding	956.55	619.51	857.2	612.53	-0.566801	1.25035e-06	6.46608e-05	Dnase2a
Syn2|2900074L19Rik|AI836018|AI841723|-|6 53.2 cM|6 F|protein-coding	2.29	26.73	6.52	23.9	2.42243	1.28611e-06	6.63673e-05	Syn2
Hes1|Hry|bHLHb39|-|16 B2|16 21.09 cM|protein-coding	1517.67	2203.11	1707.89	2200.13	0.437795	1.30541e-06	6.72189e-05	Hes1
Fgfr1|AW208770|Eask|FLG|Fgfr-1|Flt-2|Hspy|MFR|bFGF-R-1|c-fgr|-|8 A2|8 14.12 cM|protein-coding	184	300.68	173.12	309.75	0.764536	1.3519e-06	6.94641e-05	Fgfr1
Btnl9|B430208I01|Btn3|D330012D11Rik|-|11|11 B1.2|protein-coding	54.86	25.77	76.32	20.92	-1.50257	1.36392e-06	6.99324e-05	Btnl9
Tspan32|AW208513|Art-1|BB235973|D7Wsu37e|Phemx|Tssc6|-|7 F5|7 88.09 cM|protein-coding	522.27	787.51	590.08	905.35	0.591992	1.37492e-06	7.0346e-05	Tspan32
Igsf8|ESTM34|EWI-2|KCT-4|PGRL|-|1 H3|1 79.59 cM|protein-coding	817.12	1245.69	876.75	1177.25	0.505994	1.41671e-06	7.23306e-05	Igsf8
Kcna3|Kca1-3|Kv1.3|Mk-3|-|3 F2.3|3 46.59 cM|protein-coding	957.69	1325.88	970.75	1348.56	0.461186	1.42152e-06	7.24223e-05	Kcna3
Emid1|AW122071|CO-5|Emu1|-|11|11 A1|protein-coding	1194.25	1699.11	1310.47	1745.96	0.448291	1.42963e-06	7.26815e-05	Emid1
Gzmb|AI553453|CCP-1/C11|CCP1|Ctla-1|Ctla1|GZB|-|14 28.19 cM|14 D3|protein-coding	1694.81	2255.61	1746.05	3714.02	0.778504	1.46945e-06	7.45484e-05	Gzmb
Jag2|D12Ggc2e|Serh|mJagged2-1|sm|-|12 F1|12 61.37 cM|protein-coding	118.85	259.64	162.88	275.89	0.907149	1.47896e-06	7.48728e-05	Jag2
Fam49a|2410157M17Rik|9630047E15|D12Ertd553e|-|12 A1.1|12 5.63 cM|protein-coding	211.42	121.23	248.51	132.47	-0.872259	1.532e-06	7.7395e-05	Fam49a
Gm3488|100041747|Gm3494|-|14 A1|14|protein-coding	32	13.36	43.74	5.98	-1.96588	1.62519e-06	8.15915e-05	Gm3488
Rapgef3|2310016P22Rik|9330170P05Rik|Epac|Epac1|-|15|15 F1|protein-coding	1725.67	2513.34	1525.47	2169.25	0.518445	1.62525e-06	8.15915e-05	Rapgef3
Gm3317|100041401|-|14 A1|14|protein-coding	32	13.36	43.74	5.98	-1.96588	1.62235e-06	8.15915e-05	Gm3317
Fam109b|C920005C14Rik|IPIP27B|Ses2|-|15|15 E1|protein-coding	642.27	431.46	642.2	433.25	-0.580937	1.66222e-06	8.31007e-05	Fam109b
Jag1|ABE2|Gsfabe2|Htu|Ozz|Ser-1|-|2 F3|2 67.73 cM|protein-coding	18.29	55.36	26.06	129.48	2.02235	1.66159e-06	8.31007e-05	Jag1
Gnai3|AI158965|AW537698|Galphai3|Gnai-3|-|3 F2.3|3 46.83 cM|protein-coding	11893.4	14850	11626.7	15716.6	0.366974	1.73639e-06	8.66288e-05	Gnai3
Acsl3|2610510B12Rik|Acs3|C85929|Facl3|Pro2194|-|1 C4|1 40.84 cM|protein-coding	1335.96	865.78	1188.54	920.29	-0.509232	1.7404e-06	8.66487e-05	Acsl3
Acat2|AW742799|Tcp-1x|Tcp1-rs1|-|17 8.73 cM|17 A2-A3|protein-coding	4101.6	3150.99	3990.97	3086.55	-0.385587	1.74442e-06	8.66694e-05	Acat2
Adprhl1|Arh2|D330008N11Rik|-|8|8 A1.1|protein-coding	24	88.77	49.33	125.49	1.50677	1.79523e-06	8.90102e-05	Adprhl1
9930111J21Rik2|9930111J21Rik|Irgb5|OTTMUSG00000005540|-|11|11 B1.2|protein-coding	459.42	244.37	371.36	239.04	-0.78831	1.8206e-06	9.00821e-05	9930111J21Rik2
LOC100861615|-|-|-|protein-coding	157.71	79.23	155.43	85.65	-0.934962	1.83057e-06	9.03895e-05	LOC100861615
Kcnj11|Kir6.2|mBIR|-|7 B4|7 29.66 cM|protein-coding	5.71	20.05	0	22.91	2.9833	1.93258e-06	9.5231e-05	Kcnj11
Cxxc5|4930415K17Rik|-|18|18 B3|protein-coding	4223.89	5593.69	4178.05	5414.17	0.379848	2.0275e-06	9.9704e-05	Cxxc5
Tanc1|1200003E16Rik|Tanc|mKIAA1728|-|2|2 C1.1|protein-coding	233.14	497.32	318.31	475.08	0.803608	2.03799e-06	0.000100015	Tanc1
Gstp1|GstpiB|-|19 A|19 3.75 cM|protein-coding	5221.57	7285.17	5207.44	6637.24	0.40761	2.07241e-06	0.000101498	Gstp1
E130012A19Rik|AA409164|AI413509|AW539173|E13|esPRC2p48|-|11|11 D|protein-coding	1037.69	1505.33	1102.92	1456.13	0.457743	2.09037e-06	0.000102169	E130012A19Rik
Irs1|G972R|IRS-1|-|1 C5|1 42.0 cM|protein-coding	16	40.09	14.89	92.63	2.07699	2.09622e-06	0.000102247	Irs1
Tcf7l1|Tcf-3|Tcf3|bHLHb21|-|6 C1|6 32.27 cM|protein-coding	6.86	21.95	3.72	33.86	2.39469	2.20634e-06	0.0001074	Tcf7l1
Acaca|A530025K05Rik|Acac|Acc1|Gm738|-|11|11 C|protein-coding	5494.71	4289.77	5372.18	4072.58	-0.387617	2.23477e-06	0.000108565	Acaca
Sox12|2010205A02Rik|-|2|2 G3|protein-coding	104	242.46	154.5	273.9	0.976827	2.3022e-06	0.000111615	Sox12
Fut8|-|-|12|12 C3|protein-coding	12524.2	9658.19	12098.6	9513.64	-0.371239	2.32814e-06	0.000112646	Fut8
Ifitm2|DSPA2c|Ifitm3l|fragilis3|mil-3|-|7|7 F5|protein-coding	27118.1	36579.5	25431.3	33629.4	0.408418	2.33455e-06	0.000112729	Ifitm2
Mlec|2410014A08Rik|AI850530|ESTM19|X83352|mKIAA0152|-|5 F|5 55.99 cM|protein-coding	26993.6	21342.9	29353.4	22582.9	-0.370064	2.35756e-06	0.000113612	Mlec
Il1r2|CD121b|Il1r-2|-|1 B|1 18.65 cM|protein-coding	18.29	3.82	20.48	1	-2.94361	2.37693e-06	0.000114316	Il1r2
Mrc2|Endo180|mKIAA0709|uPARAP|-|11|11 E1|protein-coding	333.71	755.05	551.92	996.98	0.968053	2.50515e-06	0.000120242	Mrc2
Galnt6|4632410F13|AW047994|GalNAc-T6|-|15|15 F3|protein-coding	2831.92	3708.45	2564.16	3547.69	0.417901	2.52584e-06	0.000120994	Galnt6
Rbpms|2010300K22Rik|2700019M19Rik|AU017537|RBP-MS|hermes|-|8|8 A4|protein-coding	590.84	987.01	701.77	943.2	0.566549	2.58115e-06	0.000123397	Rbpms
Emilin2|FOAP-10|-|17|17 E1.3|protein-coding	13057.9	10131.6	12484.8	8925.01	-0.431543	2.74536e-06	0.000130987	Emilin2
Xcl1|AI661682|ATAC|LTN|Lptn|SCM-1|SCM-1a|Scyc1|-|1 H2.2|1 72.26 cM|protein-coding	1.14	15.27	2.79	20.92	3.05477	2.75555e-06	0.000131214	Xcl1
Atn1|Atr1|Drpla|atrophin-1|-|6 F2|6 59.17 cM|protein-coding	2613.64	3368.63	2569.75	3402.28	0.375151	2.7908e-06	0.000132629	Atn1
Slc11a2|DCT1|DMT1|Nramp2|mk|van|-|15 F1|15 56.29 cM|protein-coding	1444.53	1869.97	1470.55	2044.75	0.413828	2.81768e-06	0.000133537	Slc11a2
Pdp1|Gm1024|Ppm2c|-|4|4 A1|protein-coding	553.13	873.42	452.34	753.96	0.688382	2.821e-06	0.000133537	Pdp1
H2afj|E130307C13|-|6|6 G1|protein-coding	2138.23	3237.85	2687.95	3591.52	0.488766	2.84302e-06	0.000134314	H2afj
Kcnc3|KShIIID|Kcr2-3|Kv3.3|-|7 B4|7 28.85 cM|protein-coding	585.13	357.96	684.09	442.22	-0.679723	2.87517e-06	0.000135567	Kcnc3
Rnf166|1110031E24Rik|AW555115|Zfp313l|-|8|8 E1|protein-coding	1123.4	1526.33	1234.15	1782.81	0.476097	2.98284e-06	0.000140369	Rnf166
Vopp1|AW146242|Ecop|-|6|6 B3|protein-coding	355.42	528.82	319.24	528.87	0.640671	3.019e-06	0.000141793	Vopp1
Gls2|A330074B06Rik|AI195532|GA|GLS|Lga|-|10|10 D3|protein-coding	73.14	28.64	84.7	37.85	-1.26296	3.03528e-06	0.00014228	Gls2
Greb1|5730583K22Rik|9130004E13|AF180470|AU023194|mKIAA0575|-|12|12 A1.1|protein-coding	8	29.59	12.1	47.81	1.89285	3.04931e-06	0.000142659	Greb1
Sh3pxd2a|2310014D11Rik|AA589508|AI256723|AI413738|C230050L11|EG329070|Fish|Gm5098|Sh3md1|TSK5|Tks5|-|19|19 D2|protein-coding	2452.51	1871.88	2429.21	1885.4	-0.387962	3.06354e-06	0.000143047	Sh3pxd2a
Hid1|C630004H02Rik|-|11|11 E2|protein-coding	122.28	281.59	163.81	254.97	0.890767	3.11493e-06	0.000145164	Hid1
Itgae|A530055J10|CD103|aM290|alpha-E1|alpha-M290|-|11 B4|11 45.22 cM|protein-coding	157.71	319.78	220.58	518.91	1.12852	3.15069e-06	0.000146065	Itgae
Mir7676-2|Gm27790|mmu-mir-7676-2|-|-|ncRNA	27.43	4.77	27.92	7.97	-2.11542	3.15792e-06	0.000146065	Mir7676-2
Mir7676-1|Gm27600|mmu-mir-7676-1|-|15|15 E1|ncRNA	27.43	4.77	27.92	7.97	-2.11541	3.15855e-06	0.000146065	Mir7676-1
Cd28|-|-|1 30.52 cM|1 C1-C3|protein-coding	104	251.05	164.74	321.7	1.06975	3.14232e-06	0.000146065	Cd28
Gstp2|GSTpiA|Gst-3|Gst3|-|19 A|19 3.75 cM|protein-coding	3641.04	5194.69	3667.08	4632.32	0.418324	3.20116e-06	0.000147751	Gstp2
Itgad|Cd11d|-|7|7 F3|protein-coding	104	54.41	116.34	51.79	-1.06388	3.23e-06	0.000148796	Itgad
Adam11|AW060611|Mdc|-|11 E1|11 66.48 cM|protein-coding	28.57	6.68	30.71	7.97	-2.01401	3.28229e-06	0.000150916	Adam11
Sort1|2900053A11Rik|AI852375|Ntr3|Ntsr3|-|3|3 F3|protein-coding	1455.96	1031.87	1682.76	1206.14	-0.500917	3.29277e-06	0.000151109	Sort1
Kmo|AI046660|-|1|1 H4|protein-coding	98.28	41.05	85.63	41.83	-1.15314	3.31752e-06	0.000151955	Kmo
Gcat|AI526977|Kbl|-|15 E1|15 37.7 cM|protein-coding	773.69	566.05	813.46	511.94	-0.567417	3.40206e-06	0.000155531	Gcat
Trpm2|9830168K16Rik|C79133|LTRPC2|TRPC7|Trp7|Trrp7|-|10 C1|10 39.72 cM|protein-coding	96	44.86	101.45	47.81	-1.10184	3.45682e-06	0.000157735	Trpm2
Adgrg3|A030001G24Rik|AW214383|Gpr97|Pb1|Pb99|-|8|8 D1|protein-coding	6176.98	7803.49	5497.83	7728.84	0.401615	3.52146e-06	0.00016038	Adgrg3
Dusp10|2610306G15Rik|AI158871|MKP-5|MKP5|-|1|1 H5|protein-coding	314.28	464.87	298.76	492.02	0.632563	3.53968e-06	0.000160905	Dusp10
Mcf2l|C130040G20Rik|Dbs|Ost|mKIAA0362|-|8|8 A2|protein-coding	58.28	147.96	91.21	174.3	1.08118	3.68775e-06	0.00016732	Mcf2l
Padi2|Pdi|Pdi2|mKIAA0994|-|4 73.01 cM|4 E1|protein-coding	2117.66	1614.15	2210.49	1706.12	-0.393657	3.80286e-06	0.000172217	Padi2
Ephb6|Cekl|Mep|-|6|6 B2.1|protein-coding	507.41	775.1	407.66	697.19	0.679784	3.84559e-06	0.000173825	Ephb6
Rab27b|2310021G14Rik|B130064M09Rik|-|18 E2|18 43.89 cM|protein-coding	77.71	153.68	88.42	163.34	0.915484	3.88039e-06	0.000175069	Rab27b
Prr36|-|-|8|8 A1.1|protein-coding	154.28	277.78	165.67	267.92	0.75811	3.95689e-06	0.000178186	Prr36
Pdia5|2700053F16Rik|AU015525|Pdir|-|16|16 B3|protein-coding	567.98	407.6	636.62	386.44	-0.612033	3.97077e-06	0.000178477	Pdia5
Siglece|Cd170|Siglec12|Siglec5|Siglec9|Siglecl1|mSiglec-E|-|7|7 B2|protein-coding	24	2.86	19.55	3.98	-2.62989	4.04358e-06	0.00018141	Siglece
Tulp4|1110057P05Rik|2210038L17Rik|Tusp|-|17 A1|17 3.72 cM|protein-coding	2835.35	3424.94	2706.57	3973.98	0.404954	4.09212e-06	0.000183246	Tulp4
Rpp40|D8Bwg1265e|Rnasep1|-|13|13 A3.3|protein-coding	333.71	206.18	345.3	218.12	-0.689504	4.18937e-06	0.000187148	Rpp40
Scarb1|AI120173|CD36|Cd36l1|Cla-1|Cla1|D5Ertd460e|Hdlq1|Hlb398|SR-B1|SR-BI|SRBI|Srb1|mSR-BI|-|5 64.11 cM|5 G1.1|protein-coding	1717.67	1336.38	1786.07	1299.76	-0.420611	4.19482e-06	0.000187148	Scarb1
Wdfy3|2610509D04Rik|ALFY|AW319683|B930017C24|BWF1|Bchs|D5Ertd66e|Ggtb3|ZFYVE25|mKIAA0993|-|5 E4-E5|5 48.95 cM|protein-coding	173.71	71.59	171.25	104.58	-0.983336	4.28759e-06	0.000190933	Wdfy3
Adap1|4930431P11Rik|Centa1|GC1L|p42IP4|-|5|5 G2|protein-coding	503.99	351.28	583.57	353.57	-0.637648	4.37095e-06	0.000194285	Adap1
Homer1|PSD-Zip45|SYN47|Ves-1|homer-1|vesl-1|-|13|13 C3|protein-coding	334.85	208.09	337.86	212.14	-0.688943	4.44391e-06	0.000197164	Homer1
Tgfbr3l|Gm14378|OTTMUSG00000016477|-|8|8 A1.1|protein-coding	221.71	349.37	176.84	339.63	0.784865	4.4833e-06	0.000198545	Tgfbr3l
Rnf180|3110001E11Rik|Rines|-|13|13 D1|protein-coding	65.14	8.59	36.3	17.93	-1.93293	4.49793e-06	0.000198827	Rnf180
Ecm1|AI663821|p85|-|3 F2.1|3 40.91 cM|protein-coding	116.57	203.32	126.58	230.07	0.818864	4.64277e-06	0.000204852	Ecm1
Enc1|Nrpb|PIG10|-|13|13 D1|protein-coding	473.13	701.6	525.86	787.82	0.562696	4.66689e-06	0.00020554	Enc1
Coro2a|9030208C03Rik|AI563590|IR10|-|4|4 B1|protein-coding	13327.6	10713.9	13680.8	10567.4	-0.353956	4.68872e-06	0.000206124	Coro2a
Tas1r1|Gpr70|T1r1|TR1|-|4 E2|4 82.83 cM|protein-coding	1399.96	1839.43	1511.51	2134.39	0.43602	4.72297e-06	0.00020725	Tas1r1
Skap2|2610021A10Rik|AA960083|BB137539|RA70|SKAP-HOM|Saps|Scap2|mSKAP55R|-|6|6 B3|protein-coding	644.55	422.87	647.79	462.14	-0.557479	4.77609e-06	0.0002092	Skap2
Arrb1|1200006I17Rik|AW208571|G430100A01Rik|-|7 E2|7 54.09 cM|protein-coding	1295.97	998.47	1383.07	982.04	-0.4464	4.91203e-06	0.000214763	Arrb1
Fbxo32|4833442G10Rik|AI430017|ATROGIN1|Gm20361|MAFbx|-|15|15 D2|protein-coding	57.14	114.55	53.98	113.54	1.02872	4.98038e-06	0.000217356	Fbxo32
Dhx34|1200013B07Rik|1810012L18Rik|Ddx34|mKIAA0134|-|7|7 A2|protein-coding	771.41	1122.56	832.07	1117.49	0.471053	5.02022e-06	0.000218698	Dhx34
Il2rg|CD132|[g]c|gamma(c)|gc|p64|-|X D|X 43.9 cM|protein-coding	5600.99	7393.99	5122.74	6881.25	0.403235	5.05641e-06	0.000219876	Il2rg
Osbpl8|AA536976|AA536995|C730029P18Rik|D330025H14Rik|ORP-8|-|10|10 D1|protein-coding	7006.67	5377.01	7141.5	5792.64	-0.352274	5.0812e-06	0.000220555	Osbpl8
Sh2d5|BC036961|-|4|4 D3|protein-coding	1891.38	2829.3	2374.29	3182.17	0.482534	5.1323e-06	0.000221972	Sh2d5
Chit1|2300002L19Rik|-|1|1 E4|protein-coding	49.14	16.23	41.88	13.94	-1.58601	5.12733e-06	0.000221972	Chit1
Col18a1|-|-|10 B5-C1|10 39.72 cM|protein-coding	25.14	61.09	31.64	131.47	1.73105	5.30041e-06	0.000228831	Col18a1
Ufsp2|1810047C23Rik|-|8|8 B1.1|protein-coding	814.84	586.1	810.67	538.83	-0.539997	5.36364e-06	0.000231146	Ufsp2
F2r|AI482343|Cf2r|Par1|ThrR|-|13 D1|13 50.21 cM|protein-coding	2089.09	1529.2	1900.55	1435.21	-0.437459	5.49761e-06	0.000236496	F2r
Clec2i|Clr-g|Clrg|Dcl1|LCL-1|OCILrP2|-|6|6 F3|protein-coding	1558.82	1961.61	1589.69	2293.75	0.42224	5.60283e-06	0.000240591	Clec2i
Tmc5|4932443L08Rik|AU016085|-|7|7 F3|protein-coding	19.43	3.82	22.34	2.99	-2.58666	5.63517e-06	0.000241405	Tmc5
Frmd4a|2700017I06Rik|5330420J21|AI594879|C230040M21Rik|Frmd4|Gm13190|OTTMUSG00000010806|mKIAA1294|-|2|2 A1|protein-coding	2218.23	1637.06	2217	1781.82	-0.386777	5.64184e-06	0.000241405	Frmd4a
AA467197|Nmes1|mir-147|-|2|2 E5|protein-coding	98.28	201.41	94.93	167.33	0.925119	5.70863e-06	0.000243829	AA467197
Alpl|APTNAP|Akp-2|Akp2|TNAP|TNSALP|-|4 D3|4 70.02 cM|protein-coding	9.14	24.82	6.52	41.83	2.07582	5.73909e-06	0.000244695	Alpl
Dock5|1110060D06Rik|AI666732|AI956923|BC016533|E130320D18|lr2|rlc|-|14|14 D1|protein-coding	1755.38	1330.65	1867.98	1419.28	-0.409419	6.04425e-06	0.00025725	Dock5
Ier5|-|-|1 G3|1 66.45 cM|protein-coding	690.27	973.65	758.55	1090.6	0.497735	6.06365e-06	0.000257619	Ier5
Piwil4|9230101H05Rik|Miwi2|-|9|9 A2|protein-coding	44.57	12.41	29.78	7.97	-1.84342	6.13196e-06	0.000260062	Piwil4
Plxna3|PlexA3|Plxa3|Plxn3|Plxn4|SEX|mKIAA4078|-|X 38.0 cM|X B-C1|protein-coding	122.28	192.82	107.03	224.1	0.854193	6.14867e-06	0.000260071	Plxna3
Micall2|A930021H16Rik|JRAB|MICAL-L2|mFLJ00139|-|5|5 G2|protein-coding	657.13	449.6	647.79	451.18	-0.544567	6.16461e-06	0.000260071	Micall2
Rcbtb1|5430409I18Rik|AW111883|CLLD7|CLLL7|-|14|14 C3|protein-coding	1122.26	1438.52	1127.12	1632.42	0.437277	6.15783e-06	0.000260071	Rcbtb1
Mdc1|6820401C03|AA413496|Nfbd1|mKIAA0170|-|17|17 B1|protein-coding	2877.64	2205.98	2819.18	2237.98	-0.368645	6.29395e-06	0.000265062	Mdc1
Degs2|2210008A03Rik|AI852933|DES2|-|12|12 F1|protein-coding	932.55	1233.29	853.48	1249.96	0.46623	6.31924e-06	0.000265662	Degs2
Fam83h|AA409316|-|15|15 D3|protein-coding	4.57	25.77	2.79	18.92	2.58829	6.39671e-06	0.00026845	Fam83h
Adora3|A3AR|A3R|AA3R|ARA3|Gpcr2|-|3 F2.2|3 46.45 cM|protein-coding	35.43	95.46	21.41	64.74	1.50583	6.45014e-06	0.00027022	Adora3
Jph2|1110002E14Rik|JP-2|Jp2|-|2|2 H3|protein-coding	37.71	107.86	51.19	91.63	1.14319	6.73523e-06	0.000281673	Jph2
Nr0b2|SHP|SHP-1|Shp1|-|4 D2.3|4 66.25 cM|protein-coding	6.86	0	13.96	0	-6.43472	6.91002e-06	0.000288481	Nr0b2
B930041F14Rik|MNCb-3966|-|4|4 E2|protein-coding	206.85	318.82	188.94	328.67	0.701952	6.96775e-06	0.000290387	B930041F14Rik
H2-Ob|A-beta-2|A-beta2|H-2Ab|H-2I|H-2Ob|H2-Ab|H2-Ab2|H2-IAb2|Ob|-|17 B1|17 17.98 cM|protein-coding	251.42	126.96	268.98	169.32	-0.827233	7.09576e-06	0.000295211	H2-Ob
Pcyt1a|CTalpha|Cctalpha|Ctpct|Cttalpha|-|16 B3|16 22.69 cM|protein-coding	999.97	706.37	1238.8	819.69	-0.566154	7.14898e-06	0.000296911	Pcyt1a
Qsox1|1300003H02Rik|QSOX|Qscn6|SOx|-|1|1 G3|protein-coding	1445.68	2096.2	1546.87	1938.18	0.421132	7.23817e-06	0.000300097	Qsox1
Plekhg2|AI194308|Clg|Cslg|-|7 A3|7 16.71 cM|protein-coding	694.84	1032.83	741.79	993	0.485119	7.26167e-06	0.000300553	Plekhg2
Serpina3f|2A1|BC049975|-|12|12 E|protein-coding	454.84	254.87	362.99	211.15	-0.816837	7.4194e-06	0.000306554	Serpina3f
Il20ra|E230031K19|-|10|10 A3|protein-coding	82.28	138.41	70.74	154.38	0.929722	7.75971e-06	0.000320065	Il20ra
Atp13a2|1110012E06Rik|AA589443|-|4|4 D3|protein-coding	5890.13	4778.5	6227.52	4798.65	-0.349835	7.89547e-06	0.000325107	Atp13a2
Dnm3|9630020E24Rik|AW061159|B230343F03Rik|C530045C17|mKIAA0820|-|1|1 H2.1|protein-coding	3.43	21	3.72	19.92	2.46179	8.1417e-06	0.000334382	Dnm3
Fzd7|Fz7|-|1 C1.3|1 30.08 cM|protein-coding	242.28	147.96	272.7	159.36	-0.757864	8.14854e-06	0.000334382	Fzd7
Anln|1110037A17Rik|2900037I21Rik|C78101|Scraps|-|9|9 A4|protein-coding	1830.81	1354.51	2107.17	1558.71	-0.447477	8.36616e-06	0.000342727	Anln
Egln3|2610021G09Rik|AI505553|AI648162|Hif-p4h-3|Phd3|SM-20|-|12|12 C1|protein-coding	2964.49	4207.68	2683.3	3598.49	0.458662	8.58643e-06	0.000351153	Egln3
Mfge8|AA408458|AI325141|MFG-E8|MP47|Mfgm|P47|SED1|lactadherin|-|7 D3|7 44.9 cM|protein-coding	1129.11	1560.7	1133.63	1494.97	0.423686	8.68376e-06	0.00035453	Mfge8
Txnip|1200008J08Rik|AA682105|Hyplip1|THIF|Tbp-2|VDUP1|-|3 F2.2|3 41.93 cM|protein-coding	1407.96	2204.07	1813.06	2359.49	0.490401	8.72061e-06	0.000355431	Txnip
Selplg|CD162|Psgl-1|Psgl1|Selp1|Selpl|-|5 F|5 55.59 cM|protein-coding	13855.6	21990.1	12107	16718.6	0.568711	8.79693e-06	0.000357935	Selplg
Vat1|VAT-1|-|11|11 D|protein-coding	2555.36	2049.43	3143.08	2165.27	-0.446476	9.27415e-06	0.000376715	Vat1
Gprin3|C030038J10Rik|C730021L23|-|6|6 B3|protein-coding	221.71	421.91	301.56	473.09	0.757461	9.4135e-06	0.000381731	Gprin3
Adora2a|A2AAR|A2aR|AA2AR|-|10|10 B5.3|protein-coding	723.41	1145.47	857.2	1112.51	0.502675	9.46037e-06	0.000382986	Adora2a
Pex6|AI132582|D130055I09Rik|mKIAA4177|-|17|17 C|protein-coding	3065.06	4341.32	3536.78	4359.42	0.387554	9.61971e-06	0.000388782	Pex6
4933404O12Rik|AW494809|-|-|ncRNA	447.99	270.14	430	303.78	-0.62414	9.78628e-06	0.00039485	4933404O12Rik
Disc1|-|-|8 E2|8 73.26 cM|protein-coding	12.57	50.59	15.82	37.85	1.61202	9.97266e-06	0.000401696	Disc1
Ptpre|PTPe|PTPepsilon|RPTPepsilon|-|7 F3|7 81.27 cM|protein-coding	3730.19	2630.75	3255.7	2699.12	-0.400711	1.01714e-05	0.000409014	Ptpre
Gm3002|ENSMUSG00000079399|-|14 A1|14|pseudo	41.14	15.27	50.26	16.93	-1.51724	1.02429e-05	0.000411206	Gm3002
Kank2|AI504612|Ankrd25|BC010245|-|9|9 A3|protein-coding	42.28	83.05	41.88	98.6	1.09593	1.0361e-05	0.000415252	Kank2
Agpat3|AW061257|AW493985|D10Jhu12e|lpaat3|-|10 C1|10 39.72 cM|protein-coding	799.98	1329.7	752.96	1039.81	0.602742	1.03948e-05	0.000415912	Agpat3
Batf3|9130211I03Rik|Snft|-|1|1 H6|protein-coding	2.29	10.5	0.93	21.91	3.27197	1.07715e-05	0.000429601	Batf3
Pgm2l1|4931406N15Rik|AI553438|BM32A|-|7|7 F1|protein-coding	1055.97	712.1	1293.72	882.44	-0.573148	1.07726e-05	0.000429601	Pgm2l1
Kif1c|B430105J22Rik|D11Bwg1349e|Ltxs1|-|11|11 B3|protein-coding	1468.53	1947.29	1353.28	1853.53	0.420756	1.08294e-05	0.000431149	Kif1c
Apbb1ip|9930118P07Rik|Prp48|-|2|2 A3|protein-coding	2809.07	2178.3	2716.8	2130.41	-0.368764	1.09694e-05	0.000436003	Apbb1ip
Bcl9l|B9L|BC003321|BCL9-2|DLNB11|-|9|9 B|protein-coding	6981.53	9504.51	6517.91	8470.84	0.404092	1.14176e-05	0.000453066	Bcl9l
Mex3a|2700083E18Rik|Gm411|Rkhd4|-|3|3 F1|protein-coding	2527.93	3182.49	2584.64	3388.34	0.350836	1.14902e-05	0.000455198	Mex3a
Tnfsf4|Ath-1|Ath1|CD134L|OX-40L|Ox40l|TXGP1|Txgp1l|gp34|-|1 H2.1|1 69.75 cM|protein-coding	35.43	64.91	31.64	106.57	1.33921	1.17519e-05	0.000464799	Tnfsf4
Bmp4|Bmp-4|Bmp2b|Bmp2b-1|Bmp2b1|-|14 C1|14 23.95 cM|protein-coding	8	28.64	12.1	41.83	1.75852	1.1869e-05	0.000468662	Bmp4
Ctxn1|BC028881|Ctxn|-|8 A1.1|8 1.99 cM|protein-coding	157.71	312.14	194.52	288.84	0.756133	1.19097e-05	0.000468749	Ctxn1
Farp1|AW228844|BC030329|Cdep|-|14|14 E5|protein-coding	33.14	66.82	35.37	98.6	1.25092	1.19102e-05	0.000468749	Farp1
Plcb2|AI550384|B230205M18Rik|B230399N12|-|2 E5|2 59.43 cM|protein-coding	3207.91	2378.75	3605.65	2795.73	-0.409482	1.20653e-05	0.000473303	Plcb2
Fam111a|4632417K18Rik|AW413625|-|19|19 B|protein-coding	7771.22	5815.15	7344.4	6162.15	-0.346815	1.20494e-05	0.000473303	Fam111a
Crtac1|2810454P21Rik|AW047536|Crtac1B|Lotus|-|19|19 C3|protein-coding	108.57	48.68	114.48	63.74	-1.00206	1.2455e-05	0.000487794	Crtac1
Ahnak|DY6|-|19|19 A|protein-coding	279.99	463.91	347.16	917.3	1.11949	1.28826e-05	0.000503721	Ahnak
Mbnl3|A530038J18Rik|AI661274|CHCR|E430034C16Rik|MBLX|MBLX39|MBXL|-|X|X A5|protein-coding	2194.23	1631.34	2191.87	1782.81	-0.372753	1.30043e-05	0.000507654	Mbnl3
March3|6330411I15Rik|A530081L18Rik|AI843639|MARCH-III|-|18|18 D2|protein-coding	34.28	9.55	32.58	10.96	-1.70263	1.30756e-05	0.000509608	March3
Klrk1|D6H12S2489E|NKG2-D|Nkg2d|-|6 F3|6 63.44 cM|protein-coding	13.71	40.09	20.48	130.47	2.27665	1.33745e-05	0.000520415	Klrk1
Spata6|1700062C23Rik|AI790763|Hash|KRP|Mash|-|4|4 D1|protein-coding	650.27	847.65	604.98	938.22	0.49826	1.35962e-05	0.000527369	Spata6
Ntrk3|AW125844|Ntrk3_tv3|TrkC|-|7 D3|7 44.01 cM|protein-coding	4.57	21	9.31	51.79	2.31601	1.35971e-05	0.000527369	Ntrk3
Fgr|-|-|4 D2.3|4 66.11 cM|protein-coding	341.71	190.91	276.43	159.36	-0.824226	1.3803e-05	0.000534494	Fgr
Mkrn1|RFP|-|6|6 B1|protein-coding	1862.81	2337.71	1762.8	2386.38	0.371759	1.39593e-05	0.000539677	Mkrn1
Jund|Jund1|-|8 34.15 cM|8 C2|protein-coding	4073.03	5659.56	4800.71	6072.51	0.391557	1.40109e-05	0.000540672	Jund
Ifngr1|CD119|IFN-gammaR|Ifgr|Ifngr|Nktar|-|10 A3|10 8.49 cM|protein-coding	6460.4	9067.32	5557.39	7701.94	0.472011	1.403e-05	0.000540672	Ifngr1
Mapk12|AW123708|Erk6|P38gamma|Prkm12|Sapk3|-|15|15 E3|protein-coding	0	9.55	0	8.96	6.2263	1.42712e-05	0.000549087	Mapk12
Lrrc75a|Fam211a|-|11|11 B2|protein-coding	327.99	223.37	356.47	212.14	-0.662886	1.45108e-05	0.000557413	Lrrc75a
Anks3|2700067D09Rik|C81345|mKIAA1977|-|16 A1|16 2.48 cM|protein-coding	1234.25	834.28	1210.88	966.1	-0.453477	1.45804e-05	0.000559195	Anks3
Fstl4|B230374F23Rik|SPIG1|mKIAA1061|-|11|11 B1.3|protein-coding	80	32.45	67.01	31.87	-1.19266	1.46399e-05	0.000560581	Fstl4
Mfhas1|2310066G09Rik|D8Ertd91e|-|8 A4|8 21.16 cM|protein-coding	45.71	97.36	56.77	112.55	1.01127	1.49313e-05	0.000570833	Mfhas1
Gpr160|1700025D19Rik|GPCR150|-|3|3 B|protein-coding	243.42	146.05	241.06	149.4	-0.723175	1.52394e-05	0.000581685	Gpr160
Dhcr24|2310076D10Rik|5830417J06Rik|mKIAA0018|-|4|4 C7|protein-coding	9278.61	7441.71	9021.58	6841.41	-0.366903	1.60853e-05	0.000613002	Dhcr24
2610020H08Rik|-|-|7|7 F3|protein-coding	830.83	1143.56	870.23	1168.29	0.431441	1.64512e-05	0.000625953	2610020H08Rik
Tuba8|-|-|6|6 F1|protein-coding	1767.95	2484.71	1471.49	2129.41	0.502517	1.72156e-05	0.000654002	Tuba8
Gusb|AI747421|Gur|Gus|Gus-r|Gus-s|Gus-t|Gus-u|Gut|asd|g|-|5 G1.3|5 68.32 cM|protein-coding	4686.73	3717.04	4581.06	3638.33	-0.343425	1.73939e-05	0.000659733	Gusb
Csgalnact2|4632415D10Rik|Galnact2|-|6|6 F1|protein-coding	701.7	483.96	646.86	418.31	-0.58717	1.74381e-05	0.000660367	Csgalnact2
Maml3|AV234550|BC049812|Mam-2|mKIAA1816|-|3|3 C|protein-coding	1796.52	2318.62	1800.96	2330.6	0.359667	1.75077e-05	0.000661961	Maml3
B3gnt8|B3galt7|B7galt7|BC025206|-|7|7 A3|protein-coding	220.57	456.28	255.95	360.55	0.76756	1.83839e-05	0.000693999	B3gnt8
Ccdc8|ENSMUSG00000041117|-|7|7 A2|protein-coding	80	27.68	82.84	45.82	-1.16284	1.93802e-05	0.000730462	Ccdc8
Aldoart1|4921524E03Rik|Aldo1-ps|Aldo1-ps2|Aldoa-ps2|-|4|4 C3|protein-coding	946.26	725.46	995.88	691.21	-0.465191	1.97386e-05	0.000742808	Aldoart1
Abhd8|0910001L24Rik|AB030191|-|8|8 C1|protein-coding	2420.51	3123.31	2414.32	3068.63	0.346891	2.0219e-05	0.000759696	Abhd8
Samd4|1700024G08Rik|1700111L17Rik|4933436G17Rik|Samd4a|Smaug|Smaug1|sunk|-|14|14 C1|protein-coding	9.14	24.82	2.79	25.9	2.12333	2.02689e-05	0.000760383	Samd4
Cox4i2|Cox4b|CoxIV-2|-|2|2 H2|protein-coding	120	55.36	188.94	81.67	-1.19171	2.0361e-05	0.000762649	Cox4i2
Crip1|CRHP|CRP1|Crip|-|12 F1|12 61.59 cM|protein-coding	12066	16308.6	11959	14836.2	0.365228	2.059e-05	0.000770028	Crip1
Mapk11|P38b|Prkm11|Sapk2|Sapk2b|p38-2|p38beta|p38beta2|-|15|15 E3|protein-coding	26.29	60.14	20.48	54.78	1.2978	2.12009e-05	0.000790416	Mapk11
Dusp6|1300019I03Rik|MKP-3|MKP3|PYST1|-|10|10 C3|protein-coding	2001.09	2742.44	1582.24	2405.3	0.514444	2.11798e-05	0.000790416	Dusp6
Pik3ip1|1500004A08Rik|5830455E04Rik|Crkd|Hgfl|-|11|11 A1|protein-coding	2185.08	3087.03	2485.05	3019.82	0.376319	2.13731e-05	0.000794372	Pik3ip1
Fam3c|D6Wsu176e|Ilei|-|6 A3.1|6 9.24 cM|protein-coding	1787.38	1344.97	1750.7	1395.37	-0.379111	2.13661e-05	0.000794372	Fam3c
Cytip|A130053M09Rik|AI462064|C80816|Cbp|Cybr|Pscdbp|-|2|2 C1.1|protein-coding	1206.82	1578.83	1303.95	1789.78	0.411443	2.189e-05	0.000812329	Cytip
Lyn|AA407514|Hck-2|p53Lyn|p56Lyn|-|4 A1|4 2.05 cM|protein-coding	1293.68	892.51	1271.38	1022.88	-0.433115	2.22347e-05	0.000823849	Lyn
Tm7sf3|2010003B14Rik|NARP1|-|6|6 G3|protein-coding	1902.81	1480.52	1869.84	1441.19	-0.378506	2.30991e-05	0.000854561	Tm7sf3
P2rx1|AI323649|BB122383|P2x|Pdcd3|RP-2|-|11 B4|11 45.09 cM|protein-coding	276.56	145.09	312.73	199.2	-0.790871	2.31493e-05	0.000855101	P2rx1
Lmbr1l|1110013E13Rik|AA415653|D15Ertd735e|Limr|-|15 F1|15 55.1 cM|protein-coding	505.13	692.05	476.53	710.14	0.50494	2.33379e-05	0.000860748	Lmbr1l
Fam43a|Tuf1|-|16|16 B2|protein-coding	387.42	580.37	373.22	546.8	0.558685	2.39528e-05	0.000882071	Fam43a
Ppt2|0610007M19Rik|AA672937|-|17 B1|17 18.19 cM|protein-coding	596.56	942.15	629.17	827.66	0.520628	2.43905e-05	0.000896816	Ppt2
Atp2b4|Pmca4|-|1 E4|1 57.95 cM|protein-coding	3650.19	2868.44	3687.56	3005.88	-0.33181	2.45118e-05	0.000899901	Atp2b4
Zfp229|-|-|17|17 A3.3|protein-coding	69.71	30.55	67.01	30.88	-1.15968	2.48737e-05	0.000911797	Zfp229
Fig4|A530089I17Rik|AI326867|Sac3|-|10|10 B1|protein-coding	1418.25	1095.83	1397.96	1031.84	-0.413765	2.51134e-05	0.00091918	Fig4
Mfsd12|C19orf28|F630110N24Rik|Wdt1|-|10|10 C1|protein-coding	558.84	405.69	607.77	404.37	-0.537401	2.52891e-05	0.000924206	Mfsd12
Rxra|9530071D11Rik|Nr2b1|RXRalpha1|-|2 A3|2 19.38 cM|protein-coding	209.14	289.23	159.15	362.54	0.815305	2.54152e-05	0.000927404	Rxra
Bri3bp|2410150I18Rik|AI841257|AW742481|-|5|5 F|protein-coding	3598.76	2954.35	3747.12	2892.34	-0.339451	2.6338e-05	0.000958168	Bri3bp
Capg|gCap39|mbh1|-|6|6 C3|protein-coding	1131.4	754.1	938.18	602.57	-0.615964	2.63237e-05	0.000958168	Capg
Il13ra1|AI882074|CD213a1|IL-13R-alpha-1|IL-13r[a]|Il13ra|NR4|-|X A3.3|X 20.49 cM|protein-coding	13.71	0.95	13.96	1.99	-3.14705	2.65178e-05	0.000963253	Il13ra1
Vcl|9430097D22|AA571387|AI462105|AW545629|-|14 A3|14 11.53 cM|protein-coding	847.98	603.28	906.53	670.3	-0.474407	2.66725e-05	0.00096741	Vcl
Fam217b|9030418K01Rik|AI851938|-|2|2 H4|protein-coding	36.57	7.64	25.13	9.96	-1.79331	2.67735e-05	0.000969612	Fam217b
Filip1l|4631422O05Rik|Doc1|-|16|16 C1.1|protein-coding	462.84	657.69	456.99	655.36	0.503569	2.88178e-05	0.00104208	Filip1l
Bcl2|AW986256|Bcl-2|C430015F12Rik|D630044D05Rik|D830018M01Rik|-|1 E2.1|1 49.76 cM|protein-coding	10427.1	13477.4	10839.3	13328.3	0.323796	2.93078e-05	0.0010582	Bcl2
Clic5|5730531E12Rik|B330005L24|Gm322|jbg|-|17|17 C|protein-coding	81.14	148.91	79.11	141.43	0.848269	3.05003e-05	0.00109961	Clic5
D17H6S56E-5|G7e|-|17 B1|17 18.54 cM|protein-coding	9694.6	8018.27	10199.9	7985.8	-0.324157	3.1369e-05	0.00112924	D17H6S56E-5
Aldh3b1|1700001N19Rik|ALDH4|ALDH7|-|19|19 A|protein-coding	182.85	120.27	205.69	106.57	-0.786752	3.23568e-05	0.00116305	Aldh3b1
Ephx1|EH|Eph-1|Eph1|Epxh1|mEH|-|1 H4|1 84.48 cM|protein-coding	12.57	46.77	24.2	51.79	1.37181	3.26431e-05	0.0011716	Ephx1
Glipr2|5730414A08Rik|C77180|GAPR-1|-|4|4 B1|protein-coding	785.12	1043.33	706.42	1022.88	0.461629	3.33682e-05	0.00119583	Glipr2
Scd2|Mir5114|Scd-2|mir-5114|swty|-|19 C3|19 37.98 cM|protein-coding	31888.3	25567.8	33069.8	27122.6	-0.312945	3.34709e-05	0.00119773	Scd2
Steap3|1010001D01Rik|Tsap6|pHyde|-|1|1 E2|protein-coding	1899.38	1477.65	1818.65	1366.49	-0.395517	3.35617e-05	0.0011992	Steap3
Trpa1|Anktm1|TRPA1b|-|1|1 A3|protein-coding	362.28	194.73	365.78	258.96	-0.696049	3.41587e-05	0.00121872	Trpa1
Msmo1|1500001G16Rik|C78600|DESP4|ERG25|Sc4mol|-|8|8 B3.1|protein-coding	2330.22	1790.75	2204.9	1766.88	-0.35997	3.45789e-05	0.00123188	Msmo1
Mt1|MT-I|Mt-1|-|8 C5|8 46.34 cM|protein-coding	861.69	571.78	743.65	549.78	-0.525618	3.50317e-05	0.00124616	Mt1
Spry1|sprouty1|spry-1|-|3|3 B|protein-coding	205.71	394.23	254.09	354.57	0.690286	3.51891e-05	0.00124991	Spry1
Ilvbl|5830463I21|AI415009|-|10 C1|10 39.72 cM|protein-coding	838.83	1219.92	857.2	1108.53	0.447909	3.52938e-05	0.00124994	Ilvbl
Gimap3|2010110D23Rik|Gimap5|Ian4|-|6|6 B2.3|protein-coding	150.85	278.73	154.5	236.05	0.744505	3.52809e-05	0.00124994	Gimap3
Serpini1|AI837402|Ns|PI-12|PI12|Spi17|-|3|3 E3|protein-coding	99.43	194.73	130.3	210.15	0.797739	3.54272e-05	0.00125282	Serpini1
Serpinf1|AI195227|EPC-1|Pedf|Pedfl|Sdf3|-|11|11 B5|protein-coding	185.14	49.64	134.03	90.63	-1.19937	3.56516e-05	0.00125891	Serpinf1
Tmem158|2310037P21Rik|Ris1|-|9|9 F4|protein-coding	82.28	183.27	122.86	203.18	0.890879	3.61893e-05	0.00127602	Tmem158
Gm10406|ENSMUSG00000072735|-|14|14 A1|protein-coding	38.86	11.45	31.64	11.95	-1.58176	3.76433e-05	0.00132534	Gm10406
Eln|AI385707|AI480567|E030024M20Rik|-|5 G2|5 74.76 cM|protein-coding	2.29	13.36	5.58	41.83	2.70597	3.77216e-05	0.00132616	Eln
Col2a1|Col2|Col2a|Col2a-1|Del1|Dmm|Lpk|M100856|Rgsc856|-|15 F1|15 53.97 cM|protein-coding	54.86	101.18	64.22	182.27	1.22828	3.79316e-05	0.00133159	Col2a1
Dedd2|2410050E11Rik|FLAME-3|-|7|7 A3|protein-coding	1327.96	1817.47	1379.34	1734.01	0.381535	3.80769e-05	0.00133475	Dedd2
Cisd3|Mel-13|Mel13|-|11|11 D|protein-coding	244.56	377.05	249.44	373.49	0.592776	3.9108e-05	0.00136889	Cisd3
Vps37b|2300007F24Rik|AI415429|BC026744|-|5|5 F|protein-coding	2114.23	2706.16	2212.35	2795.73	0.335703	3.9741e-05	0.00138769	Vps37b
Ptprj|AI450271|BET|Byp|CD148|DEP-1|PTPbeta2|Ptpb2|RPTPJ|Scc-1|Scc1|-|2 50.19 cM|2 E1-2|protein-coding	1660.53	1260.97	1658.56	1325.65	-0.370534	3.97605e-05	0.00138769	Ptprj
Hdac4|4932408F19Rik|HD4|-|1|1 D|protein-coding	1375.96	1840.38	1430.53	1812.69	0.369897	3.99782e-05	0.00139327	Hdac4
Rnasel|E230029I04Rik|-|1|1 G2|protein-coding	2230.8	1719.15	2471.09	1939.18	-0.374287	4.10349e-05	0.00142803	Rnasel
Fh1|Fh|Fh-1|-|1|1 H4|protein-coding	4126.75	3271.26	4066.36	3335.55	-0.320948	4.23906e-05	0.00147307	Fh1
Irf6|AI876454|E230028I05Rik|mirf6|-|1 H6|1 97.6 cM|protein-coding	25.14	7.64	23.27	4.98	-1.91888	4.25271e-05	0.00147568	Irf6
Jun|AP-1|Junc|c-jun|-|4 43.34 cM|4 C5-C7|protein-coding	1045.69	1337.33	959.58	1342.59	0.409171	4.26964e-05	0.00147943	Jun
Ifitm1|1110036C17Rik|DSPA2a|Mil-2|Mil2|-|7|7 F5|protein-coding	19199.5	26645.5	17035.2	22519.2	0.431526	4.28041e-05	0.00147951	Ifitm1
F13a1|1200014I03Rik|AI462306|F13a|-|13|13 A3.3|protein-coding	104	54.41	109.83	59.76	-0.916774	4.28219e-05	0.00147951	F13a1
Dyrk2|1810038L18Rik|-|10|10 D2|protein-coding	1131.4	1430.88	1057.31	1464.1	0.393775	4.32235e-05	0.00149124	Dyrk2
Impdh1|B930086D20Rik|IMPDH-I|-|6|6 A3|protein-coding	6266.12	8374.32	6149.34	7594.38	0.353951	4.41308e-05	0.00152036	Impdh1
Traf3|AI528849|CAP-1|CD40bp|CRAF1|LAP1|T-BAM|amn|-|12 60.94 cM|12 F|protein-coding	1985.09	1551.15	1894.97	1455.13	-0.377227	4.67036e-05	0.0016067	Traf3
Anxa6|AW107198|Anx6|AnxVI|Cabm|Camb|-|11 B1.3|11 32.13 cM|protein-coding	8626.05	11210.3	8543.18	10548.5	0.332152	4.68808e-05	0.00161049	Anxa6
Pdk3|2610001M10Rik|AI035637|-|X|X C3|protein-coding	1671.96	1249.51	1637.16	1329.64	-0.370354	4.70368e-05	0.00161354	Pdk3
Gstt2|AI266894|Yrs|mGSTT2|-|10 38.58 cM|10 B5-C1|protein-coding	431.99	633.82	405.8	586.63	0.534654	4.77506e-05	0.0016357	Gstt2
Nfya|AA407810|Cbf-b|SEZ-10|SEZ10|-|17 23.99 cM|17 C-D|protein-coding	4102.75	3323.76	4515.91	3559.65	-0.335649	4.88938e-05	0.00167248	Nfya
Efhd2|2600015J22Rik|AA408606|D4Wsu27e|-|4 E1|4 74.75 cM|protein-coding	3281.05	4181.91	3494.89	4351.45	0.321667	4.91587e-05	0.00167915	Efhd2
Foxo1|AI876417|Afxh|FKHR|Fkhr1|Foxo1a|-|3 C|3 23.19 cM|protein-coding	308.56	512.6	350.89	479.07	0.576675	4.98459e-05	0.0017002	Foxo1
Zfp579|1110003A17Rik|Znf579|-|7|7 A1|protein-coding	361.13	597.55	451.4	619.5	0.568644	4.99222e-05	0.0017004	Zfp579
Megf8|AW049492|Egfl4|b2b1702Clo|b2b288Clo|m687Ddg|mKIAA0817|-|7|7 A3|protein-coding	234.28	95.46	266.19	163.34	-0.968925	5.01034e-05	0.00170415	Megf8
Fnbp1l|2610318I01Rik|AW548221|TOCA1|toca-1|-|3|3 G1|protein-coding	148.57	214.77	136.82	269.91	0.752927	5.02373e-05	0.00170629	Fnbp1l
Rnf43|4732452J19Rik|-|11|11 C|protein-coding	30.86	91.64	47.47	78.68	1.09245	5.14762e-05	0.00174591	Rnf43
Dirc2|RCC4|-|16|16 B3|protein-coding	12.57	42	25.13	65.73	1.46294	5.18187e-05	0.00175505	Dirc2
Pitpnm1|DRES9|Mpt-1|Nir-2|PITPnm 1|Pitpnm|R75447|Rd9|RdgB|RdgB1|-|19 B1|19 3.81 cM|protein-coding	4125.6	5115.46	4013.31	5107.41	0.318668	5.29006e-05	0.00178917	Pitpnm1
Pak1|AW045634|PAK-1|Paka|-|7 E2|7 53.57 cM|protein-coding	359.99	252	420.69	262.94	-0.613223	5.34562e-05	0.00180542	Pak1
Ipo7|A330055O14Rik|C330016G14|Imp7|Ranbp7|-|7|7 F1|protein-coding	7326.66	5458.15	7091.24	6122.31	-0.327934	5.3963e-05	0.00181998	Ipo7
Nefh|NF-H|NF200|Nfh|mKIAA0845|-|11 3.12 cM|11 A1-A5|protein-coding	1534.82	1193.19	1515.23	1173.27	-0.375951	5.42378e-05	0.00182669	Nefh
Prss57|2900092M14Rik|GLGL782|Prssl1|UNQ782|-|10|10 C1|protein-coding	2242.23	1865.2	2384.53	1777.83	-0.354829	5.48261e-05	0.00184392	Prss57
Cntn1|AW495098|CNTN|F3cam|usl|-|15 46.39 cM|15 F|protein-coding	100.57	48.68	98.66	56.77	-0.927587	5.53087e-05	0.00185617	Cntn1
Dstyk|A930019K20Rik|C430014H23Rik|C820013G01|Ripk5|-|1|1 E4|protein-coding	363.42	228.14	378.81	264.93	-0.602627	5.53446e-05	0.00185617	Dstyk
Meis3|AI573393|Mrg2|-|7 A2|7 8.76 cM|protein-coding	2.29	17.18	3.72	16.93	2.41692	5.66634e-05	0.00189775	Meis3
Dclk1|1700113D08Rik|2810480F11Rik|AI836758|Click-I|Cpg16|Dcamkl1|Dcl|Dclk|mKIAA0369|-|3|3 D|protein-coding	10.29	32.45	17.68	49.8	1.50437	5.7046e-05	0.00190696	Dclk1
Gimap1|IAP38|Imap38|imap|-|6|6 B2.3|protein-coding	2423.93	3305.63	2728.9	3295.71	0.346599	5.70971e-05	0.00190696	Gimap1
1190002N15Rik|GoPro49|HASF|-|9|9 E3.3|protein-coding	1509.67	1953.02	1666.01	2187.18	0.370161	5.79202e-05	0.00193177	1190002N15Rik
Lmna|Dhe|-|3 F1|3 38.84 cM|protein-coding	189.71	293.05	129.37	276.88	0.834267	5.80715e-05	0.00193413	Lmna
Gabbr1|GABAB1|GABAbR1|bM573K1.1|-|17 B1|17 19.16 cM|protein-coding	790.84	999.42	804.15	1202.15	0.452213	5.86832e-05	0.00195181	Gabbr1
Fscn1|AI663989|Fan1|fascin-1|-|5 G2|5 81.84 cM|protein-coding	36.57	70.64	43.74	130.47	1.29849	5.96852e-05	0.00198239	Fscn1
Itgb2|2E6|AI528527|Cd18|LAD|LCAMB|Lfa1|MF17|-|10 C1|10 39.72 cM|protein-coding	2418.22	3098.49	2253.3	2914.25	0.354955	5.98899e-05	0.00198644	Itgb2
Pfkfb3|E330010H22Rik|iPFK-2|uPFK-2|-|2|2 A1|protein-coding	3516.48	2829.3	3681.04	2984.96	-0.319001	6.0027e-05	0.00198825	Pfkfb3
Nsdhl|AI747449|Bpa|H105E3|Str|XAP104|-|X A7.3|X 37.29 cM|protein-coding	1366.82	1000.37	1327.22	1079.65	-0.38403	6.21164e-05	0.00205463	Nsdhl
Gpr31b|12-HETER|GPR31c(t)|Gpr31|Gpr31c|-|17 A1|17 8.76 cM|protein-coding	50.28	18.14	40.02	16.93	-1.35782	6.27599e-05	0.00207306	Gpr31b
Slc35d3|6230421J19Rik|Frcl1|-|10|10 A2|protein-coding	868.55	534.55	748.31	606.55	-0.513175	6.32241e-05	0.00208553	Slc35d3
Tmem186|2810440M13Rik|4432406C05Rik|AI648175|AW210586|-|16|16 A1|protein-coding	1018.26	1367.88	1064.76	1365.49	0.381236	6.35442e-05	0.00209321	Tmem186
Hist1h2ao|-|-|13|13 A3.1|protein-coding	6166.69	5401.83	7666.43	5061.59	-0.411925	6.58035e-05	0.00216468	Hist1h2ao
Rbpj|AI843960|CBF1|Igkjrb|Igkrsbp|RBP-J|RBP-J kappa|RBP-Jkappa|RBPjk|Rbpsuh|-|5 29.37 cM|5 C1-C3|protein-coding	3975.89	3102.31	4017.03	3369.41	-0.315919	6.91463e-05	0.00227153	Rbpj
Ptpdc1|AI843923|AW456874|Naa-1|Ptpcd1|-|13|13 A5|protein-coding	20.57	50.59	15.82	42.83	1.36142	6.96085e-05	0.00227738	Ptpdc1
Unc119|D11Bhm52|HRG4|MRG4|Rg4|Rtg4|Unc119h|-|11 B5|11 46.74 cM|protein-coding	1214.82	1643.74	1182.03	1521.86	0.392339	6.95627e-05	0.00227738	Unc119
Alox5|5-LO|5-LOX|5LO|5LX|AI850497|F730011J02|-|6 F1|6 53.79 cM|protein-coding	57.14	22.91	72.6	34.86	-1.18731	6.94382e-05	0.00227738	Alox5
Klf3|9930027G08Rik|AL024007|Bklf|Tef-2|-|5|5 C3.1|protein-coding	1634.24	2184.02	1665.08	2060.69	0.353818	7.02403e-05	0.00229493	Klf3
Cass4|F730031O20Rik|-|2|2 H3|protein-coding	120	202.37	141.47	234.06	0.721672	7.0452e-05	0.00229872	Cass4
Zc3h12d|D730019B10Rik|TFL|-|10|10 A1|protein-coding	28.57	12.41	30.71	5.98	-1.6784	7.06241e-05	0.00230122	Zc3h12d
Apol7b|-|-|15|15 E1|protein-coding	247.99	393.28	210.35	341.62	0.67583	7.24475e-05	0.00235744	Apol7b
Nlrp1a|CARD7|DEFCAP|Gm14|Gm15|NAC|Nalp1|Nalp1a|Nlrp1|PP1044|-|11 B4|11 43.21 cM|protein-coding	385.13	266.32	386.25	255.97	-0.571995	7.29291e-05	0.0023699	Nlrp1a
Camk1d|A630059D12Rik|CKLiK|CaMKIdelta|E030025C11Rik|mCKLiK|-|2|2 A1|protein-coding	430.85	649.1	450.47	607.55	0.501641	7.33343e-05	0.00237985	Camk1d
Nlrp3|AGTAVPRL|AII/AVP|Cias1|FCAS|FCU|MWS|Mmig1|NALP3|Pypaf1|-|11|11 B1.3|protein-coding	745.12	1151.19	456.06	943.2	0.79545	7.34605e-05	0.00238057	Nlrp3
Bambi|2610003H06Rik|-|18|18 A1|protein-coding	85.71	40.09	73.53	38.84	-1.01422	7.35543e-05	0.00238057	Bambi
Col1a1|Col1a-1|Cola-1|Cola1|Mov-13|Mov13|-|11 59.01 cM|11 D|protein-coding	340.56	650.05	582.64	1931.21	1.46131	7.37348e-05	0.0023832	Col1a1
Lig4|5830471N16Rik|tiny|-|8|8 A1.1|protein-coding	916.55	1157.88	867.44	1213.11	0.400339	7.45379e-05	0.00240592	Lig4
Ybx3|Csda|Dpba|MSY3|MSY4|Yb2|dbpA|oxyR|-|6|6 F3|protein-coding	9715.17	7981.99	9887.16	8024.64	-0.302742	7.54264e-05	0.00243134	Ybx3
Tango6|AW413431|E330010G16|Tmco7|-|8|8 D3|protein-coding	559.98	405.69	572.4	402.38	-0.497053	7.62966e-05	0.0024561	Tango6
Clcf1|BSF-3|Bsf3|CLC|NNT-1|-|19|19 A|protein-coding	402.27	593.73	476.53	712.13	0.55636	7.70932e-05	0.00247842	Clcf1
Fndc1|1110027O12Rik|1110051A18Rik|mKIAA1866|-|17|17 A1|protein-coding	33.14	12.41	28.85	7.97	-1.59044	7.85627e-05	0.00252229	Fndc1
Bet1l|2610021K23Rik|Gs15|-|7|7 F5|protein-coding	348.56	570.82	402.08	534.84	0.546742	7.90967e-05	0.00253268	Bet1l
Ssbp3|2610021L12Rik|2610200M23Rik|5730488C10Rik|AI854733|AW551939|LAST|SSDP1|-|4|4 C7|protein-coding	7702.65	6328.7	7690.63	6195.02	-0.307707	7.90934e-05	0.00253268	Ssbp3
Mff|5230400G24Rik|AI314724|-|1|1 C5|protein-coding	2633.07	2089.52	2794.99	2263.87	-0.329845	7.99668e-05	0.00255713	Mff
Jakmip1|5830437M04Rik|C330021K24Rik|Gababrbp|Marlin-1|-|5|5 B3|protein-coding	828.55	1216.1	881.4	1104.55	0.430816	8.01063e-05	0.00255819	Jakmip1
C030034L19Rik|A130044O20Rik|-|3|3 A1|ncRNA	398.85	524.05	393.7	658.35	0.564174	8.20859e-05	0.00261793	C030034L19Rik
Abi3|2210414K06Rik|AI987680|NESH|-|11|11 D|protein-coding	1949.66	2519.07	1974.08	2454.1	0.331913	8.23451e-05	0.00261925	Abi3
Ptprcap|AI605264|CD-45-AP|LPAP|LSM-1|-|19 3.86 cM|19 B|protein-coding	7806.65	10945.9	8074.09	9583.36	0.361722	8.2331e-05	0.00261925	Ptprcap
Slc43a3|Eeg1|SEEEG-1|-|2|2 E1|protein-coding	2662.79	2021.75	2589.29	2193.16	-0.328515	8.2466e-05	0.00261963	Slc43a3
Ccdc180|E230008N13Rik|Gm1025|-|4|4 B1|protein-coding	61.71	36.27	84.7	32.87	-1.098	8.29923e-05	0.00263287	Ccdc180
Bloc1s2|2410089B13Rik|BLOS2|Bloc1s2a|-|19|19 C3|protein-coding	1261.68	899.19	1388.65	1083.63	-0.431816	8.3228e-05	0.00263687	Bloc1s2
Plcl1|C230017K02Rik|PLC-L|PLC-L1|PLCE|PLCL|PLDL1|PRIP|PRIP-1|-|1|1 C1.2-C1.3|protein-coding	123.43	230.05	154.5	230.07	0.710331	8.465e-05	0.00267839	Plcl1
Fam102a|AI426465|C230093N12Rik|Eeig1|-|2|2 B|protein-coding	1255.97	1772.61	1182.96	1530.83	0.4297	8.54399e-05	0.00269983	Fam102a
Baz1a|Acf1|B930060C03|BC065123|Gtl5|Wcrf180|cbp146|-|12|12 C|protein-coding	5314.14	3810.59	5441.98	4647.26	-0.359559	8.84319e-05	0.00279071	Baz1a
Mxd4|2810410A03Rik|Mad4|bHLHc12|-|5 B2|5 17.84 cM|protein-coding	579.41	861.96	723.18	1032.84	0.525955	8.88854e-05	0.00280135	Mxd4
Dnajc2|AU020218|MIDA1|Zrf1|Zrf2|-|5 A3|5 9.97 cM|protein-coding	5034.15	3767.63	4348.38	3498.89	-0.378158	9.08127e-05	0.00285834	Dnajc2
Pola1|AW321876|Pola|-|X 41.06 cM|X C-D|protein-coding	4718.73	3716.08	4506.6	3771.79	-0.311452	9.12519e-05	0.00286467	Pola1
Tenm4|Doc4|ELM2|Odz4|R75022|Ten-m4|l(7)-3Rn|l7Rn3|mKIAA1302|-|7 E1|7 52.53 cM|protein-coding	69.71	35.32	69.8	32.87	-1.03902	9.12087e-05	0.00286467	Tenm4
Tnfrsf18|AITR|Gitr|-|4|4 E|protein-coding	505.13	732.14	483.98	668.31	0.49332	9.16913e-05	0.00287354	Tnfrsf18
Ift81|AW060663|Cdv-1|Cdv-1r|Cdv1|-|5 F|5 62.44 cM|protein-coding	40	86.86	39.09	73.7	1.01291	9.17736e-05	0.00287354	Ift81
Samhd1|E330031J07Rik|Mg11|-|2|2 H2|protein-coding	764.55	559.37	834.87	615.52	-0.457389	9.22277e-05	0.00288401	Samhd1
Anapc11|1110011I19Rik|R75218|-|11|11 E2|protein-coding	1141.68	1483.38	1063.83	1421.27	0.388332	9.37677e-05	0.00292835	Anapc11
Fosl1|AW538199|Fra1|fra-1|-|19 A|19 4.33 cM|protein-coding	45.71	105.96	52.12	86.65	0.962778	9.39829e-05	0.00293127	Fosl1
BC035044|-|-|6|6 F3|protein-coding	2012.52	1568.33	1881.94	1469.08	-0.367598	9.50668e-05	0.00296123	BC035044
Ceacam16|Gm769|-|7|7 A3|protein-coding	122.28	46.77	93.07	62.75	-0.981329	9.55667e-05	0.00297295	Ceacam16
Cnn3|1600014M03Rik|C85854|Calpo3|-|3|3 G1|protein-coding	4974.72	4168.54	5079	3941.11	-0.319652	9.6041e-05	0.00298272	Cnn3
Nod2|ACUG|BLAU|CD|Card15|F830032C23Rik|IBD1|Nlrc2|-|8|8 C3|protein-coding	32	11.45	34.44	11.95	-1.50883	9.61289e-05	0.00298272	Nod2
D8Ertd82e|9830148H23|NACK|Sgk223|mFLJ00269|-|8 A4|8 22.78 cM|protein-coding	179.42	283.5	176.84	270.91	0.628709	9.63158e-05	0.00298282	D8Ertd82e
Tjp1|ZO1|-|7 C|7 35.02 cM|protein-coding	10.29	21	0.93	25.9	2.13153	9.63801e-05	0.00298282	Tjp1
B3galt5|1190002B21Rik|AU045265|b3Galt-V|-|16|16 C4|protein-coding	477.7	268.23	353.68	185.25	-0.878443	9.81933e-05	0.00303503	B3galt5
Gpd2|AA408484|AI448216|AU021455|AW494132|GPDH|Gdm1|Gpd-m|Gpdh-m|TISP38|-|2 C1.1|2 31.66 cM|protein-coding	2574.79	2048.48	2499.94	2029.82	-0.325331	9.83442e-05	0.00303579	Gpd2
Tnfrsf10b|DR5|KILLER|Ly98|MK|TRAILR2|TRICK2A|TRICK2B|TRICKB|-|14|14 D2|protein-coding	41.14	78.27	51.19	122.51	1.09531	9.91649e-05	0.0030572	Tnfrsf10b
Palld|2410003B16Rik|6030492A02|-|8|8 B3.3|protein-coding	5.71	15.27	4.65	33.86	2.20975	0.000100175	0.00308312	Palld
Oas2|Oasl11|-|5 F|5 60.64 cM|protein-coding	221.71	48.68	74.46	35.86	-1.81022	0.000100262	0.00308312	Oas2
Rgmb|1110059F19Rik|DRAGON|-|17|17 A2|protein-coding	6.86	18.14	5.58	31.87	1.98086	0.000100437	0.00308456	Rgmb
Slc25a24|2610016M12Rik|-|3|3 F3|protein-coding	690.27	876.28	649.65	942.2	0.43041	0.000101186	0.00310358	Slc25a24
3110043O21Rik|AI840585|-|4|4 A5|protein-coding	51.43	29.59	71.67	24.9	-1.1903	0.000101501	0.0031093	3110043O21Rik
Cd7|-|-|11 E2|11 84.85 cM|protein-coding	806.84	1219.92	982.85	1229.04	0.440144	0.000104573	0.00319932	Cd7
Dusp9|Dusp4|Mpk4|Pyst3|-|X|X B|protein-coding	133.71	73.5	123.79	73.7	-0.813342	0.000104957	0.003207	Dusp9
Irak3|4833428C18Rik|AI563835|IRAK-M|-|10|10 D2|protein-coding	604.56	796.1	527.72	790.81	0.478845	0.000105144	0.00320862	Irak3
Nmnat2|AI843915|D030041I09Rik|PNAT1|PNAT2|-|1|1 G3|protein-coding	18.29	43.91	17.68	44.82	1.28879	0.000105639	0.00321965	Nmnat2
Antxr1|2310008J16Rik|2810405N18Rik|Antrx1|Tem8|-|6|6 D1|protein-coding	13.71	31.5	16.75	56.77	1.49969	0.000107823	0.00328207	Antxr1
Fam179a|4632412N22Rik|-|17|17 E1.3|protein-coding	13.71	28.64	12.1	46.81	1.52892	0.000108356	0.00329409	Fam179a
Baiap2|IRSp53|R75030|-|11|11 E2|protein-coding	515.41	716.87	483.98	681.25	0.475886	0.000109084	0.00331206	Baiap2
Ctnna1|2010010M04Rik|AA517462|AI988031|Catna1|-|18 B1|18 18.89 cM|protein-coding	1113.11	1373.61	1113.15	1527.84	0.370576	0.000109567	0.00332251	Ctnna1
Agap1|Centg2|Ggap1|R75364|mKIAA1099|-|1|1 D|protein-coding	32	72.55	48.4	103.58	1.09894	0.000110903	0.0033588	Agap1
Emb|AL022799|Gp70|-|13|13 D2.3|protein-coding	5741.56	6788.8	4920.77	6931.05	0.353086	0.000113755	0.00344083	Emb
BC028528|L259|-|3|3 F2.1|protein-coding	243.42	147.96	263.4	176.29	-0.658007	0.000114375	0.00345524	BC028528
Trim62|6330414G21Rik|AI450348|Dear1|-|4|4 D2.2|protein-coding	58.28	88.77	49.33	126.49	0.990252	0.000116068	0.00350198	Trim62
Ninl|4930519N13Rik|Gm1004|Gm1634|mKIAA0980|-|2|2 G3|protein-coding	317.71	212.87	309.93	206.17	-0.591709	0.000116645	0.00351499	Ninl
Bax|-|-|7 29.32 cM|7 B5|protein-coding	1701.67	2249.89	1917.31	2378.41	0.34307	0.000118803	0.00357555	Bax
Npffr1|Gm236|Gpr147|NPFF1|OT7T022|-|10|10 B4|protein-coding	2.29	26.73	6.52	14.94	2.15302	0.000120239	0.00361423	Npffr1
Gpr182|AM-R|Admr|G10-D|Gpcr17|Gpcr22|MB10|NOW|-|10 D3|10 75.07 cM|protein-coding	2.29	20.05	4.65	14.94	2.2446	0.00012051	0.00361785	Gpr182
Slco3a1|5830414C08Rik|Anr1|MJAM|OATP-D|R75096|Slc21a11|-|7|7 D1|protein-coding	913.12	699.69	928.87	694.2	-0.412361	0.000121328	0.00362882	Slco3a1
Ptp4a3|AV088979|Prl-3|pPtp4a3|-|15|15 E1|protein-coding	2842.21	3984.31	3560.05	4558.62	0.404023	0.000121302	0.00362882	Ptp4a3
Gpr18|-|-|14 E5|14 65.86 cM|protein-coding	430.85	719.73	395.56	557.75	0.622158	0.000121037	0.00362882	Gpr18
Tmem109|1110006I15Rik|AA958958|C77652|-|19|19 A|protein-coding	1051.4	1485.29	1087.09	1345.57	0.3953	0.000122068	0.00364642	Tmem109
Tmem51|BC003277|-|4|4 E1|protein-coding	32	13.36	39.09	12.95	-1.44345	0.000122256	0.00364752	Tmem51
Fgf13|Fhf2|-|X A6|X 33.31 cM|protein-coding	4.57	21.95	5.58	18.92	1.96277	0.00012301	0.00366547	Fgf13
Myl9|AI327049|MLC20|Mylc2c|RLC-C|-|2|2 H1|protein-coding	13.71	22.91	4.65	49.8	1.99722	0.000123291	0.00366929	Myl9
Hn1l|2810430B18Rik|AL022629|C16orf34|D17Ertd441e|-|17 A3.3|17 12.53 cM|protein-coding	3634.19	2806.39	3624.27	3093.53	-0.310456	0.000125023	0.00371623	Hn1l
Kctd10|AW536343|C87062|mBACURD3|-|5|5 F|protein-coding	2903.92	2378.75	3226.84	2546.73	-0.327296	0.000125861	0.00373653	Kctd10
Kif26b|4832420M10|BC056349|D230039L06Rik|-|1 H4|1 83.16 cM|protein-coding	9.14	22.91	10.24	42.83	1.72497	0.000126187	0.00373698	Kif26b
Tmem119|AW208946|BC025600|obif|-|5|5 F|protein-coding	94.85	33.41	75.39	49.8	-1.03968	0.000126124	0.00373698	Tmem119
Abcg2|ABC15|ABCP|AI428558|BCRP|Bcrp1|MXR|MXR1|-|6 B3|6 27.82 cM|protein-coding	67.43	113.59	64.22	121.51	0.826807	0.000126509	0.0037419	Abcg2
Tbc1d10c|1810062O14Rik|AI428527|-|19|19 A|protein-coding	4354.17	5586.06	4486.12	5412.18	0.305123	0.000126716	0.0037434	Tbc1d10c
Rasal3|A430107D22Rik|-|17|17 B1|protein-coding	7884.36	10001.8	7412.34	9324.4	0.327777	0.000127223	0.00375379	Rasal3
Satb1|2610306G12Rik|AW413156|-|17|17 C|protein-coding	4346.17	5313.06	3951.88	5174.14	0.327917	0.000127976	0.00377136	Satb1
Ldlrap1|AA691260|ARH2|Arh|Arh1|FHCB1|FHCB2|-|4|4 D3|protein-coding	542.84	865.78	699.91	918.3	0.507919	0.000128671	0.00378722	Ldlrap1
Ptn|HARP|HB-GAM|HBBN|HBGF-8|HBNF|OSF|Osf-1|Osf1|-|6 B1|6 15.48 cM|protein-coding	10.29	25.77	14.89	75.69	1.96484	0.000129398	0.00380396	Ptn
Grcc10|2310033H05Rik|C10|-|6 F2|6 59.17 cM|protein-coding	1705.1	2199.3	1881.94	2366.46	0.336121	0.000130981	0.0038445	Grcc10
Rcn3|6030455P07Rik|D530026G20Rik|D7Ertd671e|RLP49|-|7 B4|7 29.11 cM|protein-coding	290.28	89.73	284.8	187.24	-1.07253	0.000131097	0.0038445	Rcn3
Adamts14|Adamts-14|TS14|-|10|10 B4|protein-coding	1.14	9.55	0.93	12.95	3.29091	0.000131481	0.00385106	Adamts14
Zfp35|Zfp-35|Znf271|mszf13|mszf20-1|mszf28|mszf68|-|18|18 A2|protein-coding	1163.4	794.19	1094.54	915.31	-0.412863	0.000132257	0.00386908	Zfp35
Serpinb9|BB283241|CAP-3|CAP3|PI-9|PI9|Spi6|ovalbumin|-|13 A3.3|13 13.79 cM|protein-coding	391.99	536.46	319.24	526.88	0.573467	0.00013335	0.00389633	Serpinb9
Lrig1|D6Bwg0781e|Img|LIG-1|-|6 D2|6 43.15 cM|protein-coding	12.57	33.41	10.24	31.87	1.5105	0.000134558	0.00392684	Lrig1
Pecam1|C85791|Cd31|PECAM-1|Pecam|-|11|11 E1|protein-coding	3567.9	4502.64	3228.71	4191.1	0.345911	0.000135315	0.00394414	Pecam1
Trem1|-|-|17|17 C|protein-coding	8	1.91	17.68	1	-3.07315	0.000136868	0.00398458	Trem1
Sell|AI528707|CD62L|L-selectin|LECAM-1|Lnhr|Ly-22|Ly-m22|Lyam-1|Lyam1|-|1 H2.2|1 71.37 cM|protein-coding	27153.6	34104.4	25165.1	31903.4	0.3255	0.000138907	0.00403906	Sell
Lrrc25|Mapa|-|8|8 B3.3|protein-coding	168	105	161.02	93.62	-0.734673	0.000141648	0.00410444	Lrrc25
Ccbl2|KATIII|Kat3|-|3|3 H1|protein-coding	494.84	334.09	456.06	331.66	-0.522906	0.000141668	0.00410444	Ccbl2
Flt4|AI323512|Chy|Flt-4|VEGFR-3|VEGFR3|-|11 29.69 cM|11 A5-B1|protein-coding	18.29	1.91	10.24	1.99	-2.77609	0.000141569	0.00410444	Flt4
Slc27a2|ACSVL1|FATP2|VLCS|Vlac|Vlacs|-|2|2 F1|protein-coding	77.71	37.23	66.08	33.86	-1.0164	0.000142847	0.00413362	Slc27a2
Homer2|9330120H11Rik|AW539445|CPD|Vesl-2|-|7|7 D3|protein-coding	11.43	24.82	13.03	87.65	2.16144	0.000143725	0.00415403	Homer2
Cotl1|1810074P22Rik|2010004C08Rik|Clp|-|8|8 E1|protein-coding	6302.69	5261.51	6310.36	5016.77	-0.305053	0.000144624	0.00417499	Cotl1
Eif4ebp1|4e-bp1|AA959816|PHAS-I|-|8 15.95 cM|8 A4-B1|protein-coding	1098.26	830.46	1142.01	899.37	-0.384624	0.000146123	0.0042132	Eif4ebp1
Fat1|2310038E12Rik|AU023433|Fath|mFat1|-|8 B1.1|8 24.81 cM|protein-coding	84.57	128.86	85.63	235.05	1.07755	0.000146645	0.00422321	Fat1
Nap1l1|AA407126|AI256722|D10Ertd68e|NAP-1|-|10 D1|10 58.67 cM|protein-coding	19602.9	15322.5	19467.2	16788.3	-0.294504	0.000146951	0.00422694	Nap1l1
Adam2|AI323749|Ftnb|Ph30-beta|-|14 D1|14 34.36 cM|protein-coding	27.43	79.23	42.81	69.72	1.05415	0.000147182	0.00422853	Adam2
Myo1f|C330006B10Rik|-|17 17.98 cM|17 B-C|protein-coding	1510.82	1236.15	1540.36	1130.44	-0.375763	0.000147715	0.00423878	Myo1f
Plec|AA591047|AU042537|EBS1|PCN|PLTN|Plec1|-|15 D3|15 35.48 cM|protein-coding	7062.67	8757.09	7141.5	8748.72	0.291194	0.00014883	0.0042657	Plec
Cxx1a|1110012O05Rik|Mar8.2A/B|Mart8b|-|X|X A5|protein-coding	75.43	163.23	100.52	148.4	0.805736	0.000150595	0.00431114	Cxx1a
Plau|u-PA|uPA|-|14 A3|14 11.53 cM|protein-coding	105.14	55.36	90.28	49.8	-0.895964	0.000151554	0.00433343	Plau
Rab6b|9630015C03|AI844641|C330006L04Rik|D9Bwg0185e|-|9 F1|9 54.88 cM|protein-coding	35.43	89.73	39.09	66.73	1.05749	0.000151832	0.00433624	Rab6b
Fut4|AI451562|CD15|FAL|FucT-IV|LeX|SSEA-1|Ssea1|-|9 A2|9 4.3 cM|protein-coding	535.99	362.73	493.29	365.53	-0.507963	0.000152678	0.00435521	Fut4
Inpp4b|E130107I17Rik|-|8 C2|8 39.02 cM|protein-coding	507.41	640.51	488.63	765.91	0.48581	0.000153011	0.00435956	Inpp4b
Htr1b|-|-|9 E1|9 44.61 cM|protein-coding	0	7.64	0	6.97	5.89038	0.00015352	0.00436888	Htr1b
Lox|AI893619|TSC-160|rrg|-|18 D1|18 28.22 cM|protein-coding	128	208.09	161.02	544.8	1.35813	0.000155161	0.00441036	Lox
Bcat2|Bcat-2|Eca40|-|7 B4|7 29.36 cM|protein-coding	2085.66	1700.06	2028.99	1510.91	-0.366394	0.000155354	0.00441063	Bcat2
Athl1|5730511L01Rik|BC023151|-|7|7 F5|protein-coding	1829.67	2563.94	1904.28	2267.86	0.362879	0.000156306	0.00443241	Athl1
E030011O05Rik|-|-|9|9 E3.3|ncRNA	27.43	10.5	22.34	0	-2.19334	0.000158245	0.00448211	E030011O05Rik
Foxj2|Fhx|-|6|6 F2|protein-coding	169.14	260.59	190.8	300.79	0.625757	0.000160423	0.00453845	Foxj2
Gatm|1810003P21Rik|AI314789|AT|-|2 E5|2 60.63 cM|protein-coding	98.28	38.18	134.03	70.71	-1.11393	0.00016068	0.00454039	Gatm
2900079G21Rik|C130083B14|Gm6179|-|9 F3|9|ncRNA	235.42	436.23	224.31	323.69	0.719105	0.000161878	0.00456886	2900079G21Rik
Zfp395|BC053701|Gm910|-|14|14 D1|protein-coding	1243.4	1703.88	1317.92	1609.51	0.36133	0.000162356	0.00457699	Zfp395
Glcci1|2310047L21Rik|A130036A18Rik|Fam117c|Gig18|Tssn1|-|6|6 A1|protein-coding	431.99	587.05	410.45	590.62	0.474037	0.000163346	0.00459951	Glcci1
Osbpl1a|G430090F17Rik|Gm753|ORP-1|Osbpl1b|-|18|18 A2|protein-coding	1279.97	1015.65	1357.94	1054.75	-0.360728	0.000165675	0.00465965	Osbpl1a
Pdcd1|Ly101|PD-1|Pdc1|-|1|1 D|protein-coding	861.69	1141.65	741.79	1055.74	0.44687	0.000167719	0.00471161	Pdcd1
Uck1|URK1|Umpk|-|2|2 B|protein-coding	1538.24	2023.66	1706.96	2103.52	0.335213	0.000168609	0.0047311	Uck1
Acy1|1110014J22Rik|Acy-1|-|9 F1|9 57.49 cM|protein-coding	327.99	222.41	305.28	166.33	-0.709221	0.000171132	0.00479628	Acy1
Utrn|AA589569|DRP|Dmdl|-|10 A1|10 3.77 cM|protein-coding	4302.74	5326.42	4354.89	5344.45	0.291252	0.000171812	0.00480414	Utrn
Adgrd1|E230012M21Rik|Gpr133|-|5|5 G1.3|protein-coding	412.56	294	447.68	309.75	-0.522794	0.000171716	0.00480414	Adgrd1
Itpk1|BC031182|-|12|12 E|protein-coding	954.26	737.87	958.65	723.08	-0.398768	0.000173055	0.00483329	Itpk1
Avpi1|2310008N12Rik|AA410041|VIT32|esu|mVIT32|-|19|19 C3|protein-coding	247.99	158.46	233.61	154.38	-0.63038	0.000173604	0.00484298	Avpi1
Afg3l1|1700047G05Rik|3110061K15Rik|-|8|8 E1-E2|protein-coding	3308.48	2635.53	3102.13	2529.8	-0.321168	0.00017713	0.00493562	Afg3l1
Ctbp2|AA407280|D7Ertd45e|Gtrgeo6|Ribeye|-|7 F3|7 76.32 cM|protein-coding	215.99	141.27	246.64	155.37	-0.654897	0.0001801	0.00501258	Ctbp2
Lss|2810025N20Rik|D10Ertd116e|Osc|-|10 C1|10 39.1 cM|protein-coding	2527.93	1924.38	2292.39	1924.24	-0.334576	0.000181357	0.0050359	Lss
S1pr1|AI849002|Edg1|Lpb1|S1p|S1p1|-|3|3 G1|protein-coding	67.43	116.46	62.36	113.54	0.818177	0.000181259	0.0050359	S1pr1
Fzd8|Fz8|-|18 A1|18 4.91 cM|protein-coding	6.86	19.09	10.24	46.81	1.89152	0.000183828	0.00509864	Fzd8
Spag9|3110018C07Rik|4733401I23Rik|4831406C20Rik|AW552012|JLP|JSAP2|JSAP2a|Jip4|Mapk8ip4|syd1|-|11|11 C|protein-coding	4214.74	3222.58	3911.86	3392.32	-0.307717	0.000187777	0.00520215	Spag9
Nxpe4|C130036J11|D930028F11Rik|Fam55d|-|9|9 A5.3|protein-coding	1.14	7.64	2.79	25.9	2.94137	0.000188991	0.00522419	Nxpe4
Med12l|A130035F20|A630079M02|AU044581|TRALPUSH|-|3|3 D|protein-coding	1513.1	1908.16	1627.85	2075.63	0.330967	0.000189007	0.00522419	Med12l
Mpzl2|Eva|Eva1|-|9 A5.2|9 24.84 cM|protein-coding	517.7	321.69	412.31	279.87	-0.634746	0.000193091	0.00533057	Mpzl2
Eif4e3|1300018P11Rik|AI451927|eIF4E-3|-|6|6 D3|protein-coding	1255.97	1570.24	1136.42	1540.79	0.369927	0.000193299	0.00533057	Eif4e3
Gucy1a3|1200016O07Rik|sGC-alpha1|-|3|3 E3|protein-coding	84.57	40.09	97.73	55.78	-0.944302	0.000194684	0.00536261	Gucy1a3
Prkca|AI875142|Pkca|-|11 E1|11 70.8 cM|protein-coding	4749.59	5890.56	4486.12	5632.29	0.309493	0.000195124	0.00536858	Prkca
Ptprk|AI853699|PTPk|RPTPkappa|-|10 A4|10 15.06 cM|protein-coding	32	63.96	39.09	82.67	1.01922	0.000195784	0.00537446	Ptprk
Kif20b|33cex|B130024C23|C330014J10Rik|Mphosph1|magoo|-|19|19 C2|protein-coding	2711.93	2126.75	2896.43	2397.33	-0.321982	0.000195617	0.00537446	Kif20b
9930111J21Rik1|9930111J21Rik|Iigp|-|11|11 B1.2|protein-coding	349.7	222.41	296.9	191.23	-0.650082	0.000197691	0.00542061	9930111J21Rik1
Myo1h|4631401O15Rik|-|5|5 F|protein-coding	869.69	656.73	904.67	695.2	-0.40361	0.000199577	0.00546609	Myo1h
Tmem9|1500015G18Rik|AW545782|-|1|1 E4|protein-coding	396.56	521.19	403.94	627.47	0.508036	0.000202024	0.00552682	Tmem9
Slc25a13|AI785475|Ctrn|-|6|6 A1|protein-coding	810.26	533.6	765.06	626.47	-0.452998	0.000202679	0.00553214	Slc25a13
Gpr34|Lypsr1|-|X|X A1.3|protein-coding	11.43	29.59	13.96	40.84	1.43732	0.000202645	0.00553214	Gpr34
Cep295|5830418K08Rik|5832426L23Rik|Gm1131|Kiaa1731|-|9|9 A2|protein-coding	2397.65	1845.16	2275.64	1935.2	-0.316446	0.000203817	0.00555689	Cep295
Zbtb16|AI467657|PLZF|Zfp145|lu|-|9 A5.3|9 26.47 cM|protein-coding	494.84	627.14	507.25	928.26	0.618879	0.000208846	0.00568756	Zbtb16
Arsi|BC020108|-|18|18 E1|protein-coding	27.43	62.05	40.95	84.66	1.06754	0.000210976	0.00573907	Arsi
Dars2|5830468K18Rik|aspRS|-|1|1 H2.1|protein-coding	1554.24	1169.33	1465.9	1219.08	-0.348777	0.000212503	0.00577407	Dars2
Ppfia1|C030014K08Rik|C87158|LIP.1|LIP1|-|7|7 F5|protein-coding	3838.75	3173.9	3931.41	3226.99	-0.290234	0.000212991	0.0057808	Ppfia1
Med10|AA959813|AI385605|C78613|D13Wsu50e|-|13 C1|13 35.55 cM|protein-coding	604.56	821.87	547.27	767.9	0.45697	0.000213517	0.00578855	Med10
Mcoln3|6720490O21Rik|TRPML3|Va|-|3 H2|3 71.03 cM|protein-coding	76.57	122.18	79.11	147.41	0.777576	0.000214924	0.00582014	Mcoln3
4933439C10Rik|2610028M21Rik|-|11|11 B1.3|ncRNA	867.41	1220.88	1072.2	1450.15	0.447629	0.000216101	0.00584543	4933439C10Rik
Ddx6|1110001P04Rik|E230023J21Rik|HLR2|mRCK/P54|p54|rck|-|9 26.0 cM|9 B|protein-coding	29911.2	35650.7	30499.1	38220.9	0.279064	0.000216921	0.00586102	Ddx6
Tnc|AI528729|C130033P17Rik|Hxb|TN|TN-C|Ten|cytotactin|tenascin-C|-|4 C1|4 34.06 cM|protein-coding	6.86	17.18	2.79	22.91	2.06816	0.000218608	0.00589996	Tnc
Stx7|AI315064|AI317144|AW107239|Syn7|-|10|10 A3|protein-coding	1149.68	879.15	1142.94	912.32	-0.366409	0.000220872	0.0059477	Stx7
Nedd9|Cas-L|CasL|HEF1|MEF1|Nedd-9|p105|-|13|13 A3.3-A4|protein-coding	2289.08	1617.02	1814.93	1304.74	-0.497733	0.000220665	0.0059477	Nedd9
Gpsm2|6230410J09Rik|LGN|Pins|-|3|3 F3|protein-coding	620.55	829.51	603.11	816.71	0.41841	0.000222809	0.00599316	Gpsm2
Sept5|Cdcrel-1|Cdcrel1|Pnutl1|-|16 A3|16 11.53 cM|protein-coding	4.57	11.45	1.86	24.9	2.48689	0.000223147	0.00599554	Sept5
Galnt18|2900011G21Rik|BC024988|Galntl4|-|7|7 F1|protein-coding	1.14	9.55	0	7.97	3.79043	0.000224026	0.00601246	Galnt18
Gm2a|AA408702|AW215435|GM2-AP|SAP-3|-|11 B1.3|11 32.13 cM|protein-coding	5244.43	4397.64	5165.56	3993.9	-0.32009	0.000227723	0.00610486	Gm2a
E230016M11Rik|-|-|6|6 C1|ncRNA	44.57	71.59	31.64	79.68	0.991333	0.000230248	0.00616196	E230016M11Rik
Ddx4|AV206478|Mvh|VASA|-|13 D2.2|13 63.87 cM|protein-coding	9.14	0	12.1	1.99	-3.31189	0.000230365	0.00616196	Ddx4
Gpr15|4933439K08Rik|-|16|16 C1.2|protein-coding	3.43	11.45	3.72	23.9	2.24209	0.000231137	0.00617574	Gpr15
Midn|3000003C15Rik|-|10|10 C1|protein-coding	4826.16	6055.7	4837.94	5858.38	0.292043	0.000231766	0.00618566	Midn
Aen|2700083B06Rik|Isg20l1|-|7|7 D2|protein-coding	1733.67	2166.84	1774.9	2211.08	0.308654	0.000235744	0.00628485	Aen
Tyro3|AI323366|Brt|Dtk|Etk-2|Rse|Sky|TK19-2|Tif|etk2/tyro3|tk19-1|-|2 59.97 cM|2 F|protein-coding	219.42	349.37	244.78	339.63	0.557087	0.000236023	0.00628531	Tyro3
5031439G07Rik|AW554572|mKIAA0930|-|15|15 E2|protein-coding	2732.5	3810.59	3032.32	3500.88	0.333323	0.000237265	0.0063114	5031439G07Rik
Adgrl2|AI450192|CIRL-2|Gm619|Lec1|Lphh1|Lphn2|mKIAA0786|-|3|3 H3|protein-coding	38.86	67.77	34.44	77.69	0.980838	0.000238501	0.00633726	Adgrl2
Syt12|-|-|19|19 A|protein-coding	8	18.14	6.52	33.86	1.81738	0.000239543	0.00634577	Syt12
Tktl1|C79967|-|X|X A7.3|protein-coding	3.43	18.14	5.58	18.92	1.96954	0.000239612	0.00634577	Tktl1
Tdrd7|5730495N10Rik|AI447470|PCTAIRE2BP|-|4|4 B1|protein-coding	305.13	190.91	312.73	226.09	-0.57975	0.000239454	0.00634577	Tdrd7
Mcam|1-gicerin|AV025631|CD146|CD149|Muc18|s-endo|s-gicerin|-|9|9 A5.1|protein-coding	67.43	153.68	95.87	138.44	0.818504	0.000241233	0.00638166	Mcam
Dhx29|3732415M03|AU043276|Ddxx|E130202M19Rik|-|13|13 D2.2|protein-coding	1865.09	1468.11	1831.68	1511.9	-0.321384	0.000243931	0.00644593	Dhx29
Svil|AU024053|B430302E16Rik|-|18|18 A1|protein-coding	5624.99	4404.32	5159.04	4383.33	-0.305574	0.000244205	0.00644609	Svil
Col6a2|Col6a-2|-|10 B5-C1|10 39.32 cM|protein-coding	227.42	392.32	352.75	1008.93	1.25027	0.000246069	0.00648805	Col6a2
Dkk3|AW061014|C87148|-|7|7 F1|protein-coding	17.14	29.59	14.89	74.7	1.67925	0.000246334	0.00648805	Dkk3
Apol7e|ENSMUSG00000071716|-|15|15 E1|protein-coding	141.71	227.18	122.86	201.19	0.690471	0.000247221	0.00650429	Apol7e
Slk|9A2|AV021402|AW411554|Etk4|SMAK|Stk2|mKIAA0204|mSLK|-|19|19 D2|protein-coding	6190.69	4990.42	6308.49	5363.37	-0.282895	0.000248463	0.00652982	Slk
Lmo2|Rbtn-2|Rbtn2|Rhom-2|Ttg2|-|2 E2|2 54.46 cM|protein-coding	59.43	18.14	66.08	37.85	-1.18391	0.000251517	0.00658848	Lmo2
Cpeb1|AU024112|Cpeb|mCPEB|-|7|7 D3|protein-coding	10.29	22.91	5.58	27.89	1.68786	0.000251489	0.00658848	Cpeb1
Dock10|9330153B10Rik|A630054M16Rik|Jr4|Jr5|R75174|ZIZ3|Zizimin3|mKIAA0694|-|1|1 C4|protein-coding	11932.2	9558.92	11464.7	9806.46	-0.283577	0.000251435	0.00658848	Dock10
Pten|2310035O07Rik|A130070J02Rik|AI463227|B430203M17Rik|MMAC1|TEP1|-|19 C1|19 28.14 cM|protein-coding	8119.78	10360.7	9304.52	11610.2	0.322969	0.000257365	0.00673433	Pten
Fnbp1|1110057E06Rik|2210010H06Rik|FBP1|Fbp17|-|2|2 B|protein-coding	5683.28	6913.85	5745.4	7051.57	0.278619	0.00025779	0.00673812	Fnbp1
Dntt|Tdt|-|19 C3|19 34.32 cM|protein-coding	8269.49	11964.4	9923.45	11361.2	0.349185	0.000258784	0.00675677	Dntt
Osbpl5|1110006M06Rik|AI462538|ORP5|Obph1|Osbp2|-|7 F5|7 88.29 cM|protein-coding	962.26	1292.47	1109.43	1429.24	0.380717	0.000260175	0.00678571	Osbpl5
Tnfrsf1a|CD120a|FPF|TNF-R|TNF-R-I|TNF-R1|TNF-R55|TNF-alphaR1|TNFAR|TNFR60|TNFRI|TNFRp55|TNFalpha-R1|Tnfr-2|Tnfr1|p55|p55-R|-|6 F3|6 59.32 cM|protein-coding	635.41	507.82	753.89	499.98	-0.474851	0.000264608	0.00689385	Tnfrsf1a
Klhl22|2610318I18Rik|Kelchl|-|16 A3|16 11.01 cM|protein-coding	379.42	574.64	451.4	602.57	0.488915	0.000266801	0.00693991	Klhl22
Fam160a2|4632419K20Rik|6530415H11Rik|FHIP|-|7|7 E3|protein-coding	291.42	467.73	329.48	435.24	0.52852	0.000266953	0.00693991	Fam160a2
Ptprs|AL022616|PTP|PTP-NU3|PTPNU-3|PTPsigma|Ptpt9|R-PTP-S|RPTPsigma|-|17 D|17 29.32 cM|protein-coding	7150.66	8564.27	7395.59	9274.6	0.283067	0.000267365	0.0069414	Ptprs
Zfp52|KRAB11|Zfp-52|Zfp76|mszf23-2|mszf24|mszf34|mszf75|zfec29|-|17 A3.2|17 11.4 cM|protein-coding	241.14	166.09	268.05	171.31	-0.606137	0.000267587	0.0069414	Zfp52
Fam117a|5730593F17Rik|AW548096|-|11|11 D|protein-coding	1132.54	882.01	1201.57	944.19	-0.365677	0.000270342	0.00699775	Fam117a
Mir8104|Gm27380|mmu-mir-8104|-|-|ncRNA	30.86	65.86	27.92	56.77	1.05532	0.000270088	0.00699775	Mir8104
Col4a1|Bru|Col4a-1|Del(8)44H|Raw|Svc|-|8 A1.1|8 5.53 cM|protein-coding	81.14	145.09	113.55	342.62	1.30046	0.00027157	0.00702198	Col4a1
Hist1h2ag|-|-|13|13 A2-A3|protein-coding	2635.36	2342.48	3130.98	2169.25	-0.363617	0.000272062	0.00702715	Hist1h2ag
Pitpnc1|1110020B03Rik|5830436L09Rik|AI662802|AI851387|C330017I21Rik|Dnr411|RDGBB|RDGBB1|rdgB-beta|-|11|11 E1|protein-coding	4244.46	5231.92	4340	5279.71	0.281711	0.000273487	0.00705636	Pitpnc1
Nck2|4833426I10Rik|Grb4|NCKbeta|Nck-2|-|1|1 C1|protein-coding	6207.83	7969.58	5799.38	7194.99	0.327661	0.000275711	0.00708335	Nck2
Ap1s3|1190009B22|Jr2|[s]3A|-|1|1 C4|protein-coding	665.12	467.73	645	506.96	-0.437349	0.000275204	0.00708335	Ap1s3
Gm3696|ENSMUSG00000056940|Gm10014|-|14|14 A1|protein-coding	51.43	20.05	48.4	25.9	-1.12629	0.000275462	0.00708335	Gm3696
Hsp90aa1|86kDa|89kDa|AL024080|AL024147|Hsp86-1|Hsp89|Hsp90|Hspca|hsp4|-|12 F1|12 60.75 cM|protein-coding	42840	33989.8	41819.6	36433.1	-0.276933	0.000275184	0.00708335	Hsp90aa1
Znrf1|B830022L21Rik|Rnf42|Zrfp1|nin283|-|8|8 E1|protein-coding	4402.17	5342.65	4484.26	5522.73	0.279299	0.000278321	0.00714278	Znrf1
Gng2|-|-|14 A3|14 11.17 cM|protein-coding	1474.25	1119.69	1354.21	1097.57	-0.360477	0.000282475	0.00724166	Gng2
Repin1|AI425994|Ap4|E430037F08Rik|Zfp-464|Zfp464|-|6|6 B2.3|protein-coding	2436.51	3388.67	2861.07	3334.55	0.333186	0.000285286	0.00730594	Repin1
Hist1h2bq|Gm13646|OTTMUSG00000013203|-|13|13 A3.1|protein-coding	466.27	309.28	400.21	278.88	-0.565702	0.00028712	0.00734507	Hist1h2bq
Pald1|MMPAL|Pald|mKIAA1274|-|10|10 B4|protein-coding	1.14	18.14	6.52	16.93	2.06396	0.000297571	0.00760435	Pald1
Fblim1|2410043F08Rik|Cal|Fblp1|Gt10|migfilin|migfilin(s)|-|4|4 E1|protein-coding	3.43	12.41	3.72	20.92	2.15973	0.000301251	0.00769021	Fblim1
Actr2|4921510D23Rik|AA409782|Arp2|D6Ertd746e|-|11 A3.1|11 12.88 cM|protein-coding	12653.4	10301.6	12712.9	10832.3	-0.274311	0.000302975	0.0077219	Actr2
Eda2r|9430060M22Rik|TNFRSF27|Xedar|-|X|X C3|protein-coding	1.14	19.09	11.17	33.86	1.98386	0.000303135	0.0077219	Eda2r
Sbk1|Sbk|-|7|7 F1-F3|protein-coding	388.56	550.78	427.21	582.65	0.461655	0.000303761	0.00772966	Sbk1
Gstt3|AI118089|-|10|10 C1|protein-coding	150.85	74.46	141.47	99.6	-0.759552	0.000308269	0.0078361	Gstt3
Neil1|2810450N13Rik|Nei1|-|9|9 C|protein-coding	420.56	647.19	445.82	573.69	0.485173	0.000309205	0.00784423	Neil1
Hist1h2br|Gm11277|OTTMUSG00000000449|-|13|13 A3.1|protein-coding	466.27	309.28	399.28	278.88	-0.564134	0.000309241	0.00784423	Hist1h2br
Cep170b|AI466840|AW555464|Kiaa0284|mKIAA0284|-|12 F1|12 61.2 cM|protein-coding	569.13	811.37	652.44	842.6	0.424464	0.000312792	0.00791759	Cep170b
Usp14|2610005K12Rik|2610037B11Rik|AW107924|C78769|ax|nmf375|-|18 A1|18 4.91 cM|protein-coding	3716.47	2914.26	3605.65	3124.4	-0.289091	0.000312705	0.00791759	Usp14
Sfrp2|AI851596|Sdf5|-|3 E3|3 37.37 cM|protein-coding	76.57	38.18	76.32	43.82	-0.908316	0.000315544	0.00794086	Sfrp2
Hist1h2ap|ENSMUSG00000060262|Gm11276|OTTMUSG00000000448|-|13|13 A3.1|protein-coding	5675.28	5124.05	6976.76	4726.94	-0.370056	0.000314783	0.00794086	Hist1h2ap
Sardh|-|-|2|2 A3|protein-coding	4.57	14.32	4.65	22.91	1.96675	0.000314172	0.00794086	Sardh
Ehd2|BC027084|C130052H20Rik|-|7 A2|7 8.65 cM|protein-coding	8	21	13.03	58.76	1.86974	0.000315693	0.00794086	Ehd2
Mxra8|1200013A08Rik|1700095D18Rik|AI131686|Asp3|Dicam|-|4 E2|4 87.58 cM|protein-coding	14.86	33.41	20.48	61.75	1.39079	0.000315488	0.00794086	Mxra8
Adgrb2|Bai2|-|4|4 D2.2|protein-coding	2.29	17.18	0	5.98	3.33831	0.000315105	0.00794086	Adgrb2
Mier3|5730509D14|AU015422|D130064H19Rik|-|13|13 D2.2|protein-coding	1546.24	1132.1	1489.17	1273.86	-0.346671	0.000318145	0.00799419	Mier3
Gp1bb|-|-|16 A3|16 11.53 cM|protein-coding	0	2.86	0	12.95	5.9839	0.000319077	0.00800924	Gp1bb
Plin3|1300012C15Rik|M6prbp1|Tip47|-|17|17 D|protein-coding	1007.97	1338.29	1157.83	1491.98	0.373051	0.0003216	0.00806414	Plin3
Caskin2|1600028L06Rik|mKIAA1139|-|11|11 E2|protein-coding	201.14	126.96	215	143.42	-0.634891	0.000326849	0.00818723	Caskin2
Smpd5|ENSMUSG00000071724|Gm10345|MA-nSMase|-|15|15 D3|protein-coding	36.57	76.36	41.88	74.7	0.927038	0.000328676	0.00822442	Smpd5
Scand1|2310003H23Rik|Leap1|PGC-2|Ppargc2|-|2|2 H2|protein-coding	1185.11	1790.75	1484.52	1750.94	0.39645	0.000334023	0.00834662	Scand1
Pcbp3|AlphaCP-3|-|10|10 B5.1-B5.3|protein-coding	45.71	95.46	44.68	76.69	0.921724	0.000334254	0.00834662	Pcbp3
Tm7sf2|3110041O18Rik|ANG1|C14SR|Dhcr14|-|19|19 A|protein-coding	453.7	322.64	456.99	335.65	-0.478842	0.000340154	0.00848271	Tm7sf2
Insig1|1810013C12Rik|Insig-1|-|5|5 B1|protein-coding	2669.64	1959.7	2245.85	1883.41	-0.364405	0.000340409	0.00848271	Insig1
A330040F15Rik|-|-|19|19|ncRNA	3.43	22.91	6.52	15.94	1.89666	0.000342048	0.00851473	A330040F15Rik
Gm3500|100041758|Gm3401|-|14 A1|14|protein-coding	73.14	43.91	93.07	44.82	-0.921705	0.000345307	0.00858696	Gm3500
Amotl1|2310010G08Rik|2310067L22Rik|4932416D09Rik|JEAP|mFLJ00155|-|9|9 A3|protein-coding	10.29	28.64	13.96	37.85	1.41476	0.000346547	0.00860891	Amotl1
Trio|6720464I07Rik|AA408740|Solo|-|15|15 B1|protein-coding	1154.25	1405.11	1074.06	1445.17	0.345415	0.000349607	0.00866701	Trio
Matn2|Crtm2|matrilin-2|-|15|15 B3.3|protein-coding	94.85	138.41	93.07	178.28	0.739512	0.000349568	0.00866701	Matn2
Flcn|AU014660|B430214A04Rik|Bhd|FLCL|-|11|11 B1.3|protein-coding	1554.24	1871.88	1602.72	2095.55	0.317729	0.000359045	0.00889183	Flcn
Rhobtb3|1700040C17Rik|2610033K01Rik|4930503C18Rik|AI317148|AW208826|mKIAA0878|-|13|13 C1|protein-coding	184	287.32	216.86	317.72	0.578165	0.000365941	0.00905327	Rhobtb3
Spef1|4931426K16Rik|Clamp|-|2|2 F3|protein-coding	181.71	277.78	219.65	356.56	0.642983	0.000366392	0.00905511	Spef1
Pqlc1|2310009N05Rik|4933425L21Rik|5730564E11Rik|C78974|-|18|18 E3|protein-coding	461.7	361.78	507.25	318.71	-0.519414	0.00036988	0.00913194	Pqlc1
Tnni2|-|-|7 F5|7 87.93 cM|protein-coding	9.14	0	8.38	1	-3.8625	0.00037422	0.00922961	Tnni2
Acer3|1110057L18Rik|5430429L08Rik|AV015045|Phca|-|7|7 E2|protein-coding	611.41	453.41	618.01	467.12	-0.428022	0.000379694	0.00935501	Acer3
Mesdc1|AW061151|-|7|7 D3|protein-coding	2178.23	2846.48	2304.49	2723.02	0.303116	0.000382617	0.00941739	Mesdc1
Sigirr|AI256711|TIR8|-|7|7 F5|protein-coding	1076.54	1371.7	1015.43	1317.69	0.353383	0.000390786	0.00960862	Sigirr
Il4ra|CD124|Il4r|-|7 F3|7 68.94 cM|protein-coding	5671.85	8153.81	5680.25	6637.24	0.373917	0.000392314	0.00963521	Il4ra
Sept3|3110018K01Rik|AV154067|B530002E20Rik|Sep3|-|15|15 E2|protein-coding	22.86	42.95	25.13	63.74	1.12903	0.000392669	0.00963521	Sept3
Olfr523|MOR104-4|-|7|7 F4|protein-coding	9.14	19.09	1.86	21.91	1.94744	0.000393363	0.00964241	Olfr523
Hpse|HSE1|Hpa|Hpr1|-|5|5 E4|protein-coding	51.43	22.91	53.98	27.89	-1.06411	0.000394023	0.00964874	Hpse
Clec4d|Clecsf8|Mpcl|mcl|-|6 58.33 cM|6 F3|protein-coding	234.28	152.73	217.79	144.42	-0.61257	0.000394927	0.00966104	Clec4d
Rhbdl1|Rhbdl|-|17 A3.3|17 12.93 cM|protein-coding	249.14	343.64	273.63	474.09	0.629561	0.00039587	0.00967428	Rhbdl1
Rab27a|2210402C08Rik|2410003M20Rik|4933437C11Rik|ash|-|9 D|9 40.08 cM|protein-coding	7309.52	8913.64	7563.12	9157.08	0.27033	0.000397843	0.00971263	Rab27a
Cox6b2|1700067P11Rik|BC048670|COXVIB2|-|7|7 A1|protein-coding	17.14	43.91	23.27	47.81	1.14996	0.000398463	0.0097179	Cox6b2
Cxx1b|Mart8c|-|X|X A5|protein-coding	84.57	165.14	107.03	154.38	0.720105	0.000403652	0.00983446	Cxx1b
Tm9sf2|1500001N15Rik|AA536814|D14Ertd64e|P76|-|14 E5|14 65.86 cM|protein-coding	13070.5	16504.3	12184.2	15072.2	0.31287	0.00040801	0.00992054	Tm9sf2
1700024P16Rik|C1orf168|Gm620|-|4|4 C6|protein-coding	11.43	21.95	8.38	37.85	1.58296	0.000407746	0.00992054	1700024P16Rik
Taf4b|105kDa|2610524B04Rik|4932409F03Rik|AW987595|TAFII-105|TAFII105|Taf2c2|-|18|18 A1|protein-coding	627.41	846.69	589.15	791.81	0.42112	0.000410922	0.00998126	Taf4b
Snx13|Rgs-px1|mKIAA0713|-|12|12 A3|protein-coding	1260.54	1576.93	1297.44	1644.37	0.32156	0.00041163	0.00998836	Snx13
P2rx7|AI467586|P2X(7)|P2X7R|-|5|5 F|protein-coding	1106.26	1533.02	927.94	1273.86	0.457476	0.00041996	0.0101802	P2rx7
Matk|CHK|HYL|Ntk|p56ntk|-|10 39.72 cM|10 C1|protein-coding	46.86	32.45	79.11	21.91	-1.22493	0.00042091	0.010193	Matk
Sema4a|AI132332|SemB|Semab|-|3|3 F1|protein-coding	7670.65	10010.4	7733.44	9105.29	0.302262	0.000422826	0.0102188	Sema4a
Gm3383|ENSMUSG00000079376|-|14 A1|14|protein-coding	104	55.36	94.93	58.76	-0.807926	0.000422487	0.0102188	Gm3383
Prf1|Pfn|Pfp|Prf-1|-|10 B4|10 32.18 cM|protein-coding	4.57	12.41	2.79	19.92	2.11268	0.000424589	0.0102511	Prf1
Rufy1|3000002E04Rik|Rabip4|ZFYVE12|-|11|11 B1.3|protein-coding	556.56	428.6	559.37	368.51	-0.493542	0.000429404	0.0103466	Rufy1
Rusc2|AI840675|mKIAA0375|-|4|4 A5|protein-coding	4.57	10.5	2.79	23.9	2.19586	0.000429219	0.0103466	Rusc2
Prkd3|4930557O20Rik|5730497N19Rik|PKD3|Pkcnu|Prkcn|-|17|17 E3|protein-coding	2941.64	3533.76	2842.45	3552.67	0.282785	0.000430934	0.0103731	Prkd3
Ddah2|1110003M04Rik|AU019324|AW413173|DDAH-2|DDAHII|Ddah|G6a|NG30|-|17|17 B1|protein-coding	269.71	390.41	280.15	391.42	0.496618	0.000445145	0.0107044	Ddah2
Serpina3i|2B2|EG628900|Gm6930|-|12|12 E|protein-coding	239.99	153.68	205.69	118.52	-0.715121	0.000452518	0.0108708	Serpina3i
Gng10|AV006524|-|4 B3|4 32.36 cM|protein-coding	1910.81	1441.38	1817.72	1574.65	-0.316938	0.000455139	0.0109229	Gng10
Htr2a|E030013E04|Htr-2|Htr2|-|14 D2|14 39.37 cM|protein-coding	28.57	9.55	19.55	5.98	-1.60288	0.000466475	0.0111838	Htr2a
Bspry|-|-|4|4 C1|protein-coding	24	50.59	16.75	41.83	1.18856	0.000469729	0.0112506	Bspry
Tpm4|2610528G24Rik|Tpm4.2|Tpm4.2cy|-|8|8 B3.3|protein-coding	8044.36	9630.51	7417	9412.05	0.290413	0.000471797	0.0112889	Tpm4
Gm2897|ENSMUSG00000079410|-|14 A1|14|protein-coding	53.71	25.77	50.26	24.9	-1.03976	0.000473153	0.0112988	Gm2897
Fn1|E330027I09|Fn|Fn-1|-|1 C1-C5|1 36.05 cM|protein-coding	393.13	472.5	397.42	1217.09	1.07433	0.000472694	0.0112988	Fn1
Klrc1|CD159a|NKG2A|NKG2B|-|6|6 G1-2|protein-coding	6.86	25.77	16.75	44.82	1.5123	0.000475112	0.0113343	Klrc1
Gadd45a|AA545191|Ddit1|GADD45|-|6|6 C1|protein-coding	114.28	198.55	150.78	231.07	0.676958	0.00047662	0.0113591	Gadd45a
Ssbp4|1210002E11Rik|AW743380|Sspb4|-|8|8|protein-coding	3273.05	4502.64	3369.25	3902.27	0.33094	0.000478914	0.0114024	Ssbp4
Tgfb2|BB105277|Tgf-beta2|Tgfb-2|-|1 H5|1 89.95 cM|protein-coding	150.85	108.82	182.42	97.61	-0.703373	0.000482791	0.0114834	Tgfb2
Slc30a4|Znt4|lm|znT-4|-|2 E5|2 60.65 cM|protein-coding	999.97	1401.29	1121.53	1336.61	0.357126	0.000484124	0.0115037	Slc30a4
Zfp827|2810449M09Rik|D630040G17Rik|Znf827|-|8|8 C1-C2|protein-coding	40	80.18	36.3	66.73	0.940324	0.000497768	0.0118162	Zfp827
Rarg|Nr1b3|RAR-gamma|RARD|RARgamma2|-|15 57.4 cM|15 E-F3|protein-coding	73.14	105.96	67.94	139.44	0.786658	0.000501735	0.0118986	Rarg
Mex3b|4931439A04Rik|M-04814|Rkhd3|mKIAA2009|-|7 D3|7 47.35 cM|protein-coding	835.41	1117.78	994.95	1353.54	0.419058	0.000507106	0.0120142	Mex3b
Macrod1|AI604841|AW743046|D930010J01Rik|Lrp16|-|19|19 A|protein-coding	353.13	507.82	401.15	544.8	0.467237	0.000508391	0.0120209	Macrod1
Oas1a|L3|-|5 F|5 60.65 cM|protein-coding	218.28	68.73	94.93	59.76	-1.28875	0.000508385	0.0120209	Oas1a
Ggact|A2ld1|-|14|14 E5|protein-coding	450.27	625.23	464.43	611.53	0.424685	0.000512878	0.0121151	Ggact
Pea15a|Mat1|PEA-15|Pea15|Pkcs15|-|1 H3|1 79.54 cM|protein-coding	77.71	122.18	69.8	125.49	0.740796	0.000519954	0.0122702	Pea15a
Ryr3|AI851294|C230090H21|RYR-3|-|2|2 E5-F3|protein-coding	134.85	290.18	225.24	340.63	0.789762	0.000525304	0.0123843	Ryr3
Zfp106|Cd-1|D2Dcr28|H3a|Sh3bp3|Znf106|sirm|-|2 60.37 cM|2 F1|protein-coding	10903.7	8981.41	10384.2	8673.03	-0.280005	0.000536364	0.0126327	Zfp106
Sgpl1|AI428538|D10Xrf456|S1PL|Spl|-|10 B4|10 32.14 cM|protein-coding	607.98	776.05	597.53	814.71	0.389561	0.000537543	0.012648	Sgpl1
C230035I16Rik|-|-|13|13|ncRNA	10.29	27.68	12.1	32.87	1.40381	0.000552308	0.0129828	C230035I16Rik
Hdac7|5830434K02Rik|HD7|HD7a|Hdac7a|mFLJ00062|-|15|15 F2|protein-coding	3997.61	5399.92	4032.86	4702.04	0.32244	0.000555189	0.0130377	Hdac7
Col5a1|AI413331|-|2 19.38 cM|2 A2-B|protein-coding	69.71	116.46	97.73	383.45	1.55119	0.000558842	0.0130892	Col5a1
Mir1903|Mirn1903|mmu-mir-1903|-|8|8 75.78 cM|ncRNA	3.43	16.23	6.52	20.92	1.82322	0.000557974	0.0130892	Mir1903
She|9430022A14|-|3|3 F1|protein-coding	120	189	139.61	220.11	0.639106	0.000559016	0.0130892	She
Gbe1|2310045H19Rik|2810426P10Rik|D16Ertd536e|-|16 C2|16 40.19 cM|protein-coding	436.56	605.19	457.92	603.57	0.423304	0.000560632	0.0131028	Gbe1
Lancl2|1700003F10Rik|-|6|6 C1|protein-coding	758.84	597.55	808.81	605.56	-0.392915	0.000560684	0.0131028	Lancl2
Sidt1|AW045928|B830021E24Rik|-|16|16 B4|protein-coding	446.85	560.32	364.85	591.61	0.497195	0.000572162	0.013358	Sidt1
Mir1668|Gm27590|mmu-mir-1668|-|-|ncRNA	4.57	26.73	11.17	21.91	1.55623	0.000574148	0.0133914	Mir1668
Fam198a|C730027P07Rik|-|9|9 F4|protein-coding	58.28	105	60.5	99.6	0.772539	0.000582644	0.0135764	Fam198a
Atp5l|4933437C06Rik|-|9|9 A5.2|protein-coding	3205.63	2507.62	3272.45	2840.55	-0.288425	0.000586092	0.0136435	Atp5l
Rnase10|4930474F22Rik|Rah1|-|14|14 C1|protein-coding	86.85	139.37	98.66	162.35	0.684399	0.000589426	0.0137078	Rnase10
Coro7|0610011B16Rik|AW048373|AW556392|-|16 A1|16 2.45 cM|protein-coding	10762	13351.4	9956.96	12346.2	0.301119	0.000600755	0.0139578	Coro7
Aes|AL024115|Esp1|Grg|Grg-5|Grg5|Tle5|-|10 C1|10 39.72 cM|protein-coding	6187.26	8195.81	6852.97	7845.37	0.289054	0.000609145	0.0141391	Aes
Trmt2a|Htf9c|-|16 A3|16 11.31 cM|protein-coding	3403.34	2802.57	3439.98	2916.24	-0.26979	0.000611935	0.0141902	Trmt2a
Susd3|1700017I11Rik|2810440J20Rik|-|13|13 B1|protein-coding	308.56	230.05	336.92	222.1	-0.524652	0.000621505	0.0143982	Susd3
Zfp623|2610029D06Rik|AI847036|-|15|15 D3|protein-coding	73.14	154.64	98.66	137.45	0.746843	0.000623597	0.0144328	Zfp623
Prr7|XM_484263|-|13|13 B1|protein-coding	86.85	168	71.67	119.52	0.857555	0.000625088	0.014451	Prr7
Map2k7|5930412N11Rik|JNKK 2|Jnkk2|MAPKK 7|MEK 7|Mapkk7|Mek7|Mkk7|Prkmk7|sek2|-|8|8 A1.1|protein-coding	3009.06	3555.72	2946.69	3683.15	0.270858	0.000625588	0.014451	Map2k7
Cxcr4|CD184|Cmkar4|LESTR|PB-CKR|PBSF/SDF-1|Sdf1r|b2b220Clo|-|1 E4|1 56.43 cM|protein-coding	4267.31	5247.19	4107.32	5002.83	0.281866	0.000628969	0.0145013	Cxcr4
Zfp518b|6820424L24Rik|AA410078|AI661722|Znf518b|-|5|5 B3|protein-coding	1209.11	921.15	1257.42	1036.82	-0.345181	0.00062868	0.0145013	Zfp518b
Nr3c1|GR|Grl-1|Grl1|-|18 B3|18 21.09 cM|protein-coding	2916.49	3676.95	3181.24	3777.77	0.278899	0.000631217	0.0145392	Nr3c1
Ltbp3|Ltbp2|mFLJ00070|-|19 4.34 cM|19 B|protein-coding	80	120.27	85.63	160.35	0.743859	0.000636182	0.0146395	Ltbp3
Kntc1|D330012D13|jgl|-|5|5 F|protein-coding	3153.06	2548.66	3109.57	2673.22	-0.273	0.000641306	0.0147365	Kntc1
Kctd15|BC031749|-|7|7 B1|protein-coding	43.43	86.86	29.78	62.75	1.03776	0.000641622	0.0147365	Kctd15
Angpt1|1110046O21Rik|Ang-1|Ang1|-|15 B3.1|15 16.69 cM|protein-coding	3923.32	2725.26	4215.28	3616.42	-0.373669	0.000642799	0.0147494	Angpt1
Smo|E130215L21Rik|Smoh|bnb|smoothened|-|6 A3.3|6 12.36 cM|protein-coding	5552.99	6964.44	5575.08	6600.39	0.275992	0.000644903	0.0147836	Smo
Ranbp2|A430087B05Rik|AI256741|NUP358|-|10 B4|10 29.34 cM|protein-coding	11659.1	9397.6	11380	9958.84	-0.262376	0.000646306	0.0148016	Ranbp2
Serpina3h|6C28|Spi2|-|12|12 E|pseudo	263.99	181.37	240.13	139.44	-0.656939	0.000652251	0.0149236	Serpina3h
Pja1|praja-1|-|X C3|X 43.38 cM|protein-coding	97.14	211.91	172.19	311.74	0.937229	0.000656617	0.0150092	Pja1
Rab38|2310011F14Rik|AU043391|cht|-|7 E1|7 49.19 cM|protein-coding	180.57	63	202.9	131.47	-0.998772	0.000657437	0.0150137	Rab38
Trpm1|4732499L03Rik|AI606771|Ltrpc1|Mlsn1|-|7 C|7 34.61 cM|protein-coding	3.43	11.45	3.72	19.92	2.07298	0.000660836	0.015077	Trpm1
Cdc42ep1|1810058K22Rik|AA980734|Borg5|CEP1|MSE55|-|15|15 E1|protein-coding	1.14	7.64	4.65	38.84	2.86928	0.000662916	0.0151101	Cdc42ep1
Ubash3a|5830413C03Rik|C330001M22|Sts-2|TULA|TULA-1|-|17|17 A3.3|protein-coding	1348.54	1115.88	1359.8	1045.78	-0.334694	0.0006672	0.0151933	Ubash3a
Rab43|1810048P08Rik|2500004H21Rik|AW490415|-|6|6 D1|protein-coding	1839.95	2410.25	1838.19	2189.17	0.313411	0.00067458	0.0153469	Rab43
Vps18|9930024E13Rik|-|2|2 E5|protein-coding	931.4	680.6	1062.89	828.66	-0.415697	0.000675942	0.0153633	Vps18
Ldlrad3|6430500P08|AI194318|Lrad3|-|2|2 E2|protein-coding	172.57	118.36	195.45	121.51	-0.630455	0.00068213	0.0154893	Ldlrad3
Wscd1|mKIAA0523|-|11|11 B4|protein-coding	28.57	62.05	37.23	65.73	0.931311	0.000683662	0.0155094	Wscd1
Gm11992|OTTMUSG00000005148|-|11|11 A1|protein-coding	28.57	9.55	18.61	5.98	-1.57303	0.000687469	0.0155811	Gm11992
Actg2|ACTA3|Act-4|Act4|SMGA|-|6 C3|6 35.94 cM|protein-coding	10.29	22.91	4.65	22.91	1.63865	0.000691024	0.0156469	Actg2
Rhod|AI326383|Arhd|Rho|RhoHP1|RhoM|-|19|19 A|protein-coding	26.29	46.77	22.34	54.78	1.05558	0.00070212	0.0158832	Rhod
Jak3|fae|wil|-|8 B3.3|8 34.43 cM|protein-coding	3494.76	4401.46	3806.69	4491.89	0.27374	0.00070342	0.0158977	Jak3
Akap1|AKAP121|AKAP84|Akap|C76494|C81186|DAKAP1|S-AKAP84|-|11|11 C|protein-coding	1843.38	1508.2	1820.51	1489	-0.299712	0.00070589	0.0159385	Akap1
Col16a1|2700007F12Rik|A530052M23Rik|AI838662|CA1F|-|4|4 D2.2|protein-coding	8	24.82	17.68	56.77	1.60828	0.000723832	0.0163283	Col16a1
Nlrp1b|ENSMUSG00000070390|Nalp1b|OTTMUSG00000006087|OTTMUSG00000006089|-|11|11 B4|protein-coding	41.14	23.86	44.68	15.94	-1.11108	0.000731972	0.0164836	Nlrp1b
Tarsl2|A530046H20Rik|-|7|7 C|protein-coding	473.13	326.46	431.86	331.66	-0.468274	0.00073236	0.0164836	Tarsl2
Spib|Spi-B|-|7 B4|7 28.83 cM|protein-coding	30.86	76.36	51.19	82.67	0.921324	0.000732771	0.0164836	Spib
Ncr1|Ly94|NKp46|-|7|7 A1|protein-coding	0	5.73	0.93	9.96	3.62971	0.000740711	0.0166466	Ncr1
Calcoco1|1810009B06Rik|Cocoa|Gcap11|mKIAA1536|-|15 F3|15|protein-coding	558.84	832.37	649.65	791.81	0.414859	0.00074282	0.0166784	Calcoco1
Dok2|DokR|Frip|-|14 36.71 cM|14 D2-D3|protein-coding	2061.66	2516.21	2033.65	2494.94	0.281125	0.000743929	0.0166878	Dok2
Bms1|AA408648|AU020092|AU043373|BB007109|BC030906|Bms1l|mKIAA0187|-|6|6 F1|protein-coding	4849.01	3970.95	4700.19	4034.73	-0.264807	0.00074862	0.0167773	Bms1
Fas|AI196731|APO1|APT1|CD95|TNFR6|Tnfrsf6|lpr|-|19 C1|19 29.48 cM|protein-coding	4.57	19.09	9.31	24.9	1.59223	0.000750927	0.0168134	Fas
Ccr8|C-C|C-C CKR-8|CC-CKR-8|CCR-8|CKR-8|Cmkbr8|mCCR8|-|9|9 F4|protein-coding	10.29	27.68	11.17	29.88	1.3978	0.000761353	0.0170309	Ccr8
Clstn1|1810034E21Rik|Cst-1|Cstn1|-|4|4 E1|protein-coding	101.71	189.96	136.82	193.22	0.664655	0.000770922	0.017229	Clstn1
A930001C03Rik|-|-|19|19|ncRNA	3.43	11.45	2.79	16.93	2.14442	0.000772506	0.0172483	A930001C03Rik
Qpct|5730422A13Rik|-|17|17 E3|protein-coding	10.29	29.59	11.17	27.89	1.39766	0.000774812	0.0172838	Qpct
Lrp10|Lrp9|-|14|14 C2-C3|protein-coding	4514.16	5928.74	4076.6	5049.64	0.345381	0.000775852	0.0172909	Lrp10
Zbtb7b|Thpok|Zfp67|c-Krox|-|3 39.09 cM|3 A1-A2|protein-coding	25.14	50.59	37.23	92.63	1.16538	0.000785481	0.0174841	Zbtb7b
Mef2a|A430079H05Rik|-|7 C|7 36.72 cM|protein-coding	411.42	539.32	456.06	694.2	0.493059	0.00078676	0.0174841	Mef2a
Dexi|1810029J14Rik|AI836170|AW413143|D16Bwg0586e|Myle|-|16 A1|16 5.67 cM|protein-coding	761.12	946.92	722.25	968.1	0.358796	0.000787429	0.0174841	Dexi
Patz1|8430401L15Rik|AI447519|Mazr|Patz|Zfp278|-|11|11 A1|protein-coding	6118.69	7452.21	6376.44	7593.38	0.257394	0.000786883	0.0174841	Patz1
Zeb2|9130203F04Rik|D130016B08Rik|SIP1|Zfhx1b|Zfx1b|Zfxh1b|-|2|2 C1|protein-coding	229.71	118.36	294.11	189.24	-0.785744	0.00078897	0.0175022	Zeb2
Ndufb8|2900010I05Rik|AI987932|-|19|19 D1|protein-coding	2615.93	2163.02	2556.72	2127.42	-0.279693	0.000791934	0.0175517	Ndufb8
Dsn1|1700022L09Rik|AW552447|-|2|2 H1|protein-coding	1005.69	756.96	960.51	793.8	-0.35264	0.000801969	0.0177578	Dsn1
Trim13|3110001L12Rik|CAR|LEU5|RNF77|Rfp2|-|14|14 D1|protein-coding	633.13	454.37	663.61	524.88	-0.41769	0.0008064	0.0178395	Trim13
Diaph1|D18Wsu154e|Dia1|Diap1|Drf1|p140mDia|-|18 B3|18 19.71 cM|protein-coding	7504.94	6414.61	7432.82	6014.75	-0.274763	0.000809271	0.0178865	Diaph1
Tmbim1|2310061B02Rik|AA960455|AU024746|C78899|RECS1|Tmbib1|mKIAA4161|-|1|1 C3|protein-coding	538.27	391.37	511.9	390.43	-0.434964	0.000817764	0.0180576	Tmbim1
Tesk1|AI326901|-|4|4 A5-C1|protein-coding	1194.25	1681.93	1228.56	1449.16	0.36135	0.000818534	0.0180581	Tesk1
Ahsg|-|-|16 B1|16 13.74 cM|protein-coding	4.57	26.73	11.17	20.92	1.52754	0.000821467	0.0181062	Ahsg
Ell2|-|-|13|13 C1|protein-coding	276.56	357.96	275.5	435.24	0.510159	0.000831138	0.0183025	Ell2
Eya1|bor|-|1 A3|1 4.31 cM|protein-coding	14.86	28.64	11.17	35.86	1.30501	0.00083626	0.0183985	Eya1
0610012G03Rik|AI839730|-|16|16 B2|ncRNA	637.7	816.14	648.72	855.55	0.366875	0.000838425	0.0184124	0610012G03Rik
Bcat1|BCATc|Eca39|-|6 G3|6 77.27 cM|protein-coding	1100.54	804.69	916.77	614.52	-0.513642	0.000838268	0.0184124	Bcat1
Scn1b|-|-|7 B1|7 19.3 cM|protein-coding	8	18.14	7.45	29.88	1.60861	0.000847349	0.0185914	Scn1b
Pde7a|AU015378|AW047537|-|3 A2|3 5.36 cM|protein-coding	3252.48	3741.86	3171.93	4049.67	0.267165	0.000859716	0.0188456	Pde7a
Gm10785|ENSMUSG00000074911|-|-|ncRNA	24	50.59	20.48	43.82	1.08272	0.000862452	0.0188883	Gm10785
Add3|AI463285|R75380|-|19 D2|19 47.18 cM|protein-coding	2482.22	1968.29	2270.05	1922.25	-0.298173	0.000864071	0.0189066	Add3
Fam20a|AI606893|-|11|11 E1|protein-coding	8259.21	10937.3	6717.09	9021.62	0.405786	0.000865534	0.0189214	Fam20a
Ptk2|FAK|FRNK|Fadk|mKIAA4203|p125FAK|-|15 D3|15 33.94 cM|protein-coding	22.86	44.86	15.82	40.84	1.15451	0.000868112	0.0189605	Ptk2
Ltb4r1|BLT1|BLTR|Ltb4r|mBLTR|-|14 C3|14 28.19 cM|protein-coding	97.14	46.77	103.31	68.72	-0.811053	0.000873501	0.0190609	Ltb4r1
Pvt1|Ayu21-84Imeg|Gt(pU21)84Imeg|Mis-1|Mlvi-1|Pvt-1|-|15 26.24 cM|15 D2-D3|ncRNA	78.86	128.86	85.63	136.45	0.675086	0.000876269	0.0191039	Pvt1
2300009A05Rik|-|-|9|9 D|protein-coding	130.28	231	147.99	200.19	0.619741	0.00087729	0.0191089	2300009A05Rik
Entpd1|2610206B08Rik|AA408691|Cd39|NTPDase-1|-|19 C3|19 34.25 cM|protein-coding	28.57	15.27	29.78	6.97	-1.38211	0.000882823	0.0191946	Entpd1
Pbxip1|4732463H20Rik|-|3|3 F1|protein-coding	2564.5	3377.22	2804.29	3217.03	0.286544	0.00088228	0.0191946	Pbxip1
Npnt|1110009H02Rik|AA682063|AI314031|Nctn|POEM|-|3|3 G3|protein-coding	32	64.91	30.71	56.77	0.947736	0.000884963	0.0192105	Npnt
Slc12a7|AA408796|D13Ertd261e|Kcc4|-|13 C1|13 40.15 cM|protein-coding	2189.66	2627.89	2090.42	2604.5	0.279999	0.000885153	0.0192105	Slc12a7
Sord|Sdh-1|Sdh1|Sodh-1|-|2 E5|2 60.59 cM|protein-coding	2061.66	1703.88	2309.14	1870.46	-0.30224	0.000897879	0.0194692	Sord
Slc1a5|AAAT|ASCT2|ATBO|M7V1|M7VS1|R16|RDRC|Slc1a7|-|7|7 A2|protein-coding	5295.86	6237.07	4960.8	6201.99	0.268116	0.000902976	0.019562	Slc1a5
Pigk|3000001O05Rik|-|3|3 H4|protein-coding	2847.92	2190.7	2529.73	2208.1	-0.299808	0.000905688	0.0195752	Pigk
Tdrkh|2700091C21Rik|Tdrd2|-|3|3 F2|protein-coding	190.85	123.14	202.9	140.43	-0.591946	0.000905927	0.0195752	Tdrkh
Glp1r|GLP-1R|GLP1Rc|-|17 A3.3|17 15.8 cM|protein-coding	36.57	73.5	55.84	111.55	0.970879	0.000906027	0.0195752	Glp1r
Rhoc|AI324259|Arh9|Arhc|-|3|3 F2.2|protein-coding	28.57	53.46	35.37	72.71	0.953864	0.000919386	0.019846	Rhoc
Erp29|1200015M03Rik|2810446M09Rik|AW209030|Erp28|Erp31|PDI-Db|-|5|5 F|protein-coding	2700.5	2318.62	2862	2314.67	-0.274211	0.000924997	0.0199492	Erp29
Hsd17b6|17betaHSD9|Hsd17b9|Rdh8|-|10|10 D3|protein-coding	28.57	0.95	11.17	6.97	-2.2985	0.000931915	0.0200804	Hsd17b6
Gpc6|-|-|14|14 E4|protein-coding	10.29	22.91	14.89	46.81	1.42396	0.000942531	0.0202809	Gpc6
Pitpnm2|NIR3|RDGBA2|Rdgb2|mKIAA1457|-|5 F|5 63.39 cM|protein-coding	1938.23	2378.75	2004.79	2423.23	0.273571	0.000942904	0.0202809	Pitpnm2
Pvrl2|AI325026|AI987993|Cd112|MPH|Pvr|Pvs|nectin-2|-|7 A3|7 9.94 cM|protein-coding	37.71	64.91	27.92	61.75	0.951529	0.000945451	0.0202812	Pvrl2
Pomt1|AI505244|-|2|2 B|protein-coding	1047.97	1322.06	973.54	1253.94	0.340963	0.000945248	0.0202812	Pomt1
Gbx2|D130058E05Rik|Gbx-2|MMoxA|Stra7|-|1 45.06 cM|1 C5-E1|protein-coding	50.28	98.32	77.25	144.42	0.90081	0.000945085	0.0202812	Gbx2
Sipa1|Spa1|-|19 A|19 4.34 cM|protein-coding	4083.32	4960.82	4201.32	5009.8	0.256742	0.000951123	0.0203847	Sipa1
Hspd1|60kDa|Hsp60|-|1|1 C1.2|protein-coding	18927.5	14839.5	18400.5	16518.4	-0.263181	0.000953484	0.0204171	Hspd1
Parl|D16Ertd607e|PRO2207|PSARL1|PSENIP2|Psarl|-|16 A3|16 12.4 cM|protein-coding	1781.67	1470.97	1724.64	1365.49	-0.314927	0.000960367	0.0205462	Parl
Crhbp|CRH-BP|-|13 D1|13 49.5 cM|protein-coding	8	0	13.03	2.99	-2.77781	0.000962155	0.0205662	Crhbp
Vmn2r46|-|-|7|7 A1|protein-coding	18.29	5.73	18.61	5.98	-1.64702	0.000988418	0.0211088	Vmn2r46
Trim55|D830041C10Rik|Murf2|Rnf29|-|3|3 A2|protein-coding	8	0	4.65	0	-5.66573	0.000993768	0.0212042	Trim55
Rec8|Rec8L1|mrec|-|14 C3|14 28.19 cM|protein-coding	14.86	38.18	25.13	50.8	1.10932	0.000994702	0.0212053	Rec8
Fbxo7|2410015K21Rik|A230052G17Rik|AI117679|AW260462|C85118|-|10|10 C1|protein-coding	2222.8	2576.35	2049.47	2658.28	0.282947	0.00100132	0.0213237	Fbxo7
Polq|A430110D14Rik|-|16 B3|16 26.32 cM|protein-coding	1526.82	1165.51	1487.31	1284.82	-0.309968	0.00100203	0.0213237	Polq
Snord35a|Rnu35a|U35|U35A|-|7|7 B4|snoRNA	20.57	4.77	18.61	7.97	-1.61395	0.00100731	0.0214172	Snord35a
Relb|shep|-|7 A3|7 9.93 cM|protein-coding	121.14	237.68	109.83	161.35	0.784927	0.00101065	0.0214692	Relb
Nxn|l11Jus13|-|11 B5|11 45.92 cM|protein-coding	1668.53	1360.24	1625.99	1330.63	-0.3017	0.00102868	0.0218329	Nxn
Golgb1|4930428L02Rik|628101|6330407A06Rik|AU042952|C130074L01Rik|F730017E11Rik|Gm6840|mKIAA4151|-|16|16 B3|protein-coding	3114.2	2574.44	3107.71	2655.29	-0.261263	0.00103445	0.021936	Golgb1
Ripply1|-|-|X|X F1|protein-coding	60.57	34.36	77.25	40.84	-0.892547	0.00104897	0.0222048	Ripply1
Tal1|SCL/tal-1|Scl|bHLHa17|tal-1|-|4 D1|4 52.73 cM|protein-coding	187.42	113.59	263.4	157.37	-0.752082	0.00104887	0.0222048	Tal1
Sytl4|Gph|Slp4|-|X|X E3|protein-coding	64	35.32	67.94	37.85	-0.861588	0.0011001	0.0232461	Sytl4
Rbpms2|2400008B06Rik|AI316523|-|9|9 C|protein-coding	9.14	18.14	8.38	33.86	1.54311	0.00109925	0.0232461	Rbpms2
Utp14b|4932411L21Rik|jsd|-|1 C4|1 40.84 cM|protein-coding	414.85	273	368.57	291.82	-0.480839	0.00110599	0.02335	Utp14b
Jak2|Fd17|-|19 C1|19 23.73 cM|protein-coding	3222.77	2598.3	3059.31	2661.27	-0.266662	0.00111072	0.0234293	Jak2
Frmd4b|6030440G05Rik|C87375|GOBLIN|GRSP1|R74720|mKIAA1013|-|6|6 D3|protein-coding	379.42	525.96	336.92	476.08	0.477262	0.00111243	0.023445	Frmd4b
Gulo|5730581M22|AU018375|BC028822|GLO|LGO|sfx|unh|unhip|-|14|14 D1|protein-coding	2.29	11.45	3.72	15.94	2.09826	0.00112455	0.0236797	Gulo
Ankrd49|AW060934|C86108|Gbif|-|9|9 A3|protein-coding	809.12	643.37	807.87	615.52	-0.37068	0.00114037	0.0239916	Ankrd49
Nbas|4933425L03Rik|Nag|-|12|12 A3|protein-coding	1426.25	1154.06	1356.08	1080.64	-0.325154	0.00114826	0.0241366	Nbas
Lmo7|C78582|FBXO20|Gm914|mKIAA0858|-|14 E2.3|14 50.9 cM|protein-coding	117.71	229.09	157.29	205.17	0.642978	0.00115774	0.0243146	Lmo7
Cecr5|A930002G03Rik|-|6 F1|6 56.95 cM|protein-coding	1142.83	1473.83	1195.99	1440.19	0.306783	0.00116483	0.024442	Cecr5
Spo11|AI449549|-|2 95.64 cM|2 H4|protein-coding	56	80.18	49.33	107.57	0.823813	0.00117864	0.0247103	Spo11
Bid|2700049M22Rik|AI875481|AU022477|-|6 F1|6 57.02 cM|protein-coding	1658.24	1186.51	1577.59	1409.32	-0.330034	0.00118312	0.0247825	Bid
Bnip3|Nip3|-|7|7 F5|protein-coding	227.42	168.96	278.29	174.3	-0.572997	0.00118486	0.0247974	Bnip3
Cab39l|1500031K13Rik|2810425O13Rik|4930520C08Rik|AA589432|MO2L|-|14|14 C3-D1|protein-coding	879.98	639.55	810.67	679.26	-0.368274	0.00119591	0.0250071	Cab39l
Rai14|1700008J19Rik|1700020L11Rik|Ankycorbin|Norpeg|mKIAA1334|-|15|15 A2|protein-coding	897.12	682.51	846.97	687.23	-0.358088	0.00120969	0.0252732	Rai14
Exoc4|C78892|Sec8|Sec8l1|-|6 A3.3|6 14.59 cM|protein-coding	1812.52	2298.57	1970.36	2322.63	0.277756	0.00121318	0.025324	Exoc4
Rbfox2|Fbm2|Fxh|Hrnbp2|Rbm9|-|15|15 E1|protein-coding	9.14	21	15.82	68.72	1.79482	0.00121613	0.0253636	Rbfox2
Rap1gap2|AU067654|Garnl4|Gm1561|mKIAA1039|-|11|11 B5|protein-coding	186.28	92.59	177.77	135.45	-0.688479	0.00122212	0.0254665	Rap1gap2
Mbp|C76307|Hmbpr|R75289|golli-mbp|mld|shi|-|18 55.84 cM|18 E2-E4|protein-coding	2478.79	3489.85	3097.47	3550.68	0.32546	0.00123403	0.0256703	Mbp
Evpl|-|-|11|11 E1|protein-coding	883.4	723.55	885.13	640.42	-0.383338	0.00123331	0.0256703	Evpl
Tor3a|Adir|-|1|1 H1|protein-coding	467.42	359.87	551.92	388.43	-0.45912	0.00123663	0.025702	Tor3a
Ppif|AW457192|CyP-D|CyP-F|CypD|PPIase|-|14|14 A3|protein-coding	1546.24	1298.2	1683.69	1342.59	-0.301852	0.00123772	0.0257025	Ppif
Ms4a6b|1810027D10Rik|-|-|protein-coding	468.56	586.1	429.07	613.53	0.409244	0.001239	0.0257068	Ms4a6b
Rgcc|1190002H23Rik|Rgc-32|Rgc32|-|14|14 D3|protein-coding	3684.47	4411.96	3883.01	4685.11	0.254384	0.00124729	0.0258566	Rgcc
Adam8|ADAM 8|CD156|CD156a|E430039A18Rik|MS2|-|7|7 F3-F5|protein-coding	658.27	798.01	494.22	815.71	0.477632	0.00125338	0.0259604	Adam8
Wwox|5330426P09Rik|9030416C10Rik|WOX1|-|8|8 E1|protein-coding	260.56	353.19	239.2	348.59	0.481804	0.00127969	0.0264826	Wwox
Hoxb4|Hox-2.6|-|11 D|11 59.83 cM|protein-coding	84.57	138.41	105.17	167.33	0.667984	0.00128559	0.0265675	Hoxb4
Eaf1|4933403C17Rik|AI666536|-|14|14 B|protein-coding	3599.9	4152.32	3096.54	4139.31	0.298234	0.001286	0.0265675	Eaf1
Pde7b|-|-|10|10 A3|protein-coding	35.43	11.45	26.06	13.94	-1.26609	0.00129287	0.0266864	Pde7b
Mmp15|AI503551|MT2-MMP|-|8 D1|8 47.12 cM|protein-coding	323.42	488.73	341.58	435.24	0.464716	0.00130388	0.0268905	Mmp15
Dip2a|4931420H10Rik|AI426328|Dip2|Kiaa0184-hp|mKIAA0184|-|10 C1|10 38.76 cM|protein-coding	97.14	151.77	98.66	150.39	0.615026	0.00131903	0.0271797	Dip2a
Slc9a5|Gm696|-|8|8 D3|protein-coding	633.13	763.64	520.28	791.81	0.423142	0.00132672	0.0273148	Slc9a5
Herc1|2810449H11Rik|B230218H07|D130015N03Rik|tbl|-|9|9 D|protein-coding	4051.32	3430.67	4207.83	3562.63	-0.250878	0.00133474	0.0274564	Herc1
Ppp3ca|2900074D19Rik|CN|Caln|Calna|CnA|-|3|3 G3|protein-coding	2068.52	2617.39	2343.58	2793.73	0.282683	0.00133985	0.027538	Ppp3ca
Cenpe|312kDa|AU019344|BC049989|C530022J18|CENP-E|Kif10|-|3 62.55 cM|3 H2|protein-coding	4347.31	3442.13	4211.56	3769.8	-0.258402	0.00135384	0.0278016	Cenpe
Camk2d|2810011D23Rik|8030469K03Rik|CaMK II|[d]-CaMKII|-|3|3 G1-G2|protein-coding	2977.06	3626.36	2784.75	3410.25	0.279054	0.00136096	0.0278765	Camk2d
Ltbp4|2310046A13Rik|-|7|7 A3|protein-coding	12.57	36.27	27.92	68.72	1.32464	0.00135955	0.0278765	Ltbp4
Tnk2|Ack|Ack-1|Ack1|Cdgip|Pyk1|-|16|16 B3|protein-coding	2685.64	3251.22	2456.2	3064.64	0.287483	0.00136095	0.0278765	Tnk2
Sqle|AI323792|-|15|15 D1|protein-coding	3644.47	2947.67	3285.48	2742.94	-0.293492	0.00136478	0.0278834	Sqle
Glg1|AI593353|AW537898|CFR|CFR-1|ESL-1|MG-160|MG160|Selel|-|8 E1|8 57.98 cM|protein-coding	2877.64	2525.75	3032.32	2410.28	-0.269685	0.00136471	0.0278834	Glg1
Cers4|2900019C14Rik|Lass4|Trh1|-|8|8 A1.2|protein-coding	184	304.5	242.92	330.67	0.556188	0.00136333	0.0278834	Cers4
Kazald1|AI842353|Bono1|IGFBP-rP10|-|19|19 C3|protein-coding	12.57	26.73	15.82	42.83	1.25676	0.00137371	0.028042	Kazald1
Serpina3n|Spi2-2|Spi2.2|Spi2/eb.4|-|12|12 F1|protein-coding	121.14	72.55	113.55	74.7	-0.679858	0.00137598	0.0280646	Serpina3n
Slc22a23|3110004L20Rik|-|13|13 A3.3|protein-coding	76.57	134.59	93.07	135.45	0.652734	0.00138504	0.0282254	Slc22a23
Sirt3|2310003L23Rik|AI848213|Sir2l3|-|7|7 F4|protein-coding	1381.68	1761.15	1455.66	1733.01	0.28986	0.00138875	0.0282533	Sirt3
Hist1h3d|H3-b|-|13|13 A2-A3|protein-coding	173.71	124.09	170.32	95.61	-0.65252	0.00138858	0.0282533	Hist1h3d
Pfn1|Pfn|-|11 B4|11 43.21 cM|protein-coding	25499.9	30672.7	24340.5	29333.7	0.257831	0.00139189	0.0282932	Pfn1
Mst1r|CD136|CDw136|Fv-2|Fv2|PTK8|Ron|STK|-|9 59.07 cM|9 F1|protein-coding	60.57	113.59	59.57	91.63	0.764977	0.00139608	0.0283317	Mst1r
Nampt|1110035O14Rik|AI314458|AI480535|NAmPRTase|Pbef|Pbef1|Visfatin|-|12|12 B1|protein-coding	2707.36	2143.93	2432	2088.58	-0.289593	0.00139614	0.0283317	Nampt
Ldb1|CLIM2|NLI|-|19 C3|19 38.75 cM|protein-coding	7052.38	8519.41	7152.67	8449.93	0.24629	0.00139879	0.0283614	Ldb1
Xkr6|BC024502|Xrg6|-|14|14 D1|protein-coding	16	49.64	28.85	44.82	1.03355	0.00140088	0.0283799	Xkr6
Pim3|BC026639|Kid1|-|15|15 E3|protein-coding	658.27	813.28	591.01	819.69	0.377671	0.0014062	0.0284608	Pim3
Peli2|AW047589|BB129927|-|14 C1|14 24.6 cM|protein-coding	98.28	142.23	94	156.37	0.624818	0.00141147	0.0284608	Peli2
B430306N03Rik|Treml6|-|17|17 C|protein-coding	59.43	36.27	80.04	40.84	-0.87435	0.00141197	0.0284608	B430306N03Rik
Pank3|-|-|11|11 A4|protein-coding	2983.92	2226.98	2867.58	2613.46	-0.28582	0.00140829	0.0284608	Pank3
Col1a2|AA960264|AI325291|Col1a-2|Cola-2|Cola2|oim|-|6 A1|6 1.81 cM|protein-coding	375.99	465.82	480.26	1485.01	1.16486	0.00141146	0.0284608	Col1a2
Raver2|A430091O22Rik|-|4|4 C6|protein-coding	38.86	81.14	60.5	99.6	0.8327	0.00141088	0.0284608	Raver2
Epb41l1|4.1N|Epb4.1l1|NBL1|mKIAA0338|-|2 H1|2 77.39 cM|protein-coding	8	16.23	9.31	34.86	1.52032	0.00141328	0.0284632	Epb41l1
Cpne5|A830083G22Rik|-|17|17 A3.3|protein-coding	443.42	348.41	448.61	255.97	-0.56784	0.00144812	0.0291406	Cpne5
Pgk1|Pgk-1|-|X 47.36 cM|X C-D|protein-coding	19607.5	16223.6	18517.8	15978.6	-0.253925	0.00145493	0.0292532	Pgk1
H2-Q5|H-2Q5|Qa-5|Qa5|Qat-5|-|17 B1|17 18.65 cM|pseudo	2018.23	2530.53	1339.32	2242.96	0.49873	0.00145618	0.0292537	H2-Q5
Acat3|ACTL|-|17 A1|17 8.72 cM|protein-coding	4364.45	3582.45	4084.98	3502.88	-0.263931	0.00146204	0.0293469	Acat3
Sh3bp5|AI606498|SH3BP-5|Sab|-|14|14 B|protein-coding	1302.82	1683.84	1446.36	1719.07	0.296263	0.00148463	0.0297596	Sh3bp5
Ckap2l|2010016H04Rik|2610318C08Rik|AV070319|radmis|rdm|-|2|2 F1|protein-coding	2673.07	2218.39	2564.16	2156.31	-0.269318	0.00148507	0.0297596	Ckap2l
Npm1|B23|NO38|Npm|-|11|11 A4|protein-coding	49466.1	39888	45539.7	40333.4	-0.254837	0.00149537	0.029941	Npm1
Gm13139|OTTMUSG00000010657|-|4|4 E1|protein-coding	2265.08	1722.02	2079.25	1870.46	-0.284963	0.00149886	0.0299764	Gm13139
Cpe|CPH|Cph-1|Cph1|R74677|fat|-|8 B3.1|8 32.3 cM|protein-coding	51.43	76.36	57.71	150.39	1.03232	0.00149963	0.0299764	Cpe
Trip11|2610511G22Rik|3110031G15Rik|6030460N08Rik|AI450776|GMAP-210|TRIP230|-|12|12 F1|protein-coding	1287.97	950.74	1195.99	1047.78	-0.324462	0.00150744	0.0301074	Trip11
Pip5k1b|PI4P5K-I[b]|PIP5K1-beta|PIP5KIbeta|Pipk5b|STM7|-|19|19 C1|protein-coding	123.43	85.91	144.26	85.65	-0.655402	0.00151155	0.0301395	Pip5k1b
Mb21d1|E330016A19Rik|cGAS|-|9|9 E1|protein-coding	925.69	749.33	951.21	749.98	-0.334527	0.00151101	0.0301395	Mb21d1
Pfkl|AA407869|ATP-PFK|PFK-L|-|10 C1|10 39.72 cM|protein-coding	5139.29	4491.18	5577.87	4563.6	-0.25375	0.00152097	0.0303022	Pfkl
Cmtm7|AI481279|Cklfsf7|LNV|-|9|9 F3|protein-coding	10447.7	12969.5	11096.2	12804.4	0.24853	0.00154888	0.0308327	Cmtm7
Ubl3|AW108023|HCG|-|5|5 G2-3|protein-coding	1361.11	1729.65	1414.71	1685.2	0.28862	0.00155067	0.0308429	Ubl3
Col6a1|AI747156|Col6a-1|-|10 B5-C1|10 39.71 cM|protein-coding	303.99	363.69	354.61	1099.57	1.12872	0.00155632	0.0309296	Col6a1
Cerk|AI848610|D330016D08Rik|mKIAA1646|-|15|15 E2|protein-coding	1165.68	1432.79	1206.23	1492.98	0.291619	0.00156889	0.0311279	Cerk
Phtf2|1110054G21Rik|9530062N20Rik|AI447096|C77923|-|5|5 A3|protein-coding	1421.68	1102.51	1406.33	1213.11	-0.29969	0.00156783	0.0311279	Phtf2
Eif5b|A030003E17Rik|BC018347|IF2|-|1|1 B|protein-coding	5603.28	4517.91	5589.97	4970.96	-0.249818	0.00157073	0.0311388	Eif5b
Trim26|AI462198|Zfp173|Zfp1736|-|17 B1|17 19.16 cM|protein-coding	1042.26	1344.97	911.19	1194.18	0.370652	0.00157718	0.0312409	Trim26
Fam81a|6430514L14Rik|-|9|9 D|protein-coding	6.86	13.36	6.52	33.86	1.78268	0.00159781	0.0316234	Fam81a
Gns|2610016K11Rik|AU042285|C87209|G6S|N28088|-|10|10 D2|protein-coding	1572.53	1299.15	1632.5	1347.57	-0.287122	0.00160453	0.0317303	Gns
Akap17b|AA407619|AKAP-17B|B230333C21Rik|C230056F04Rik|PRKA17B|Sfrs17b|Srsf17b|Talia|-|X|X A3.3|protein-coding	353.13	192.82	349.02	279.87	-0.585481	0.00160878	0.0317883	Akap17b
Traf4|A530032M13Rik|CART1|msp2|-|11|11 B5-C|protein-coding	2790.78	3471.72	2890.85	3365.43	0.257026	0.0016107	0.0318001	Traf4
Cd300lf|CLIM1|CLM-1|CLM1|Digr2|F730004D16Rik|IREM1|IgSF13|LMIR3|Pigr3|-|11|11 E2|protein-coding	14.86	4.77	14.89	2.99	-1.90779	0.0016196	0.0319234	Cd300lf
Mdm1|Arrd2|Mdm-1|-|10 66.65 cM|10 C1-C3|protein-coding	925.69	677.73	837.66	707.15	-0.358136	0.00161937	0.0319234	Mdm1
Smok4a|4930513D10Rik|Smok2c|-|17|17 A1|pseudo	21.71	4.77	12.1	3.98	-1.89971	0.00162575	0.0320184	Smok4a
Plcg2|PLCgamma2|Plcg-2|-|8 E1|8 64.26 cM|protein-coding	11092.3	9345.1	10930.5	9424	-0.241111	0.00163823	0.0322377	Plcg2
Mgarp|4930583H14Rik|AI195347|CESP-1|HUMMR|Osap|Qsap|-|3|3 C|protein-coding	18.29	8.59	24.2	6.97	-1.45432	0.00164296	0.0323044	Mgarp
Kalrn|2210407G14Rik|AV235988|DUET|E530005C20Rik|Gm539|Hapip|TRAD|-|16|16 B3|protein-coding	214.85	144.14	184.28	111.55	-0.646076	0.0016495	0.0324065	Kalrn
Ebf3|3110018A08Rik|O/E-2|mKIAA4201|-|7|7 F3-F4|protein-coding	9.14	13.36	5.58	45.82	1.98472	0.00165585	0.0325047	Ebf3
Mdfic|Kdt1|Mdfid|-|6|6 A1|protein-coding	509.7	662.46	572.4	781.85	0.402566	0.00167826	0.0329178	Mdfic
Rasgrp2|CDC25L|Caldaggef1|-|19|19 A|protein-coding	3402.19	4045.41	3425.09	4106.44	0.24531	0.00168334	0.0329636	Rasgrp2
Xylb|AI132223|AI327421|-|9|9 F3|protein-coding	74.28	34.36	73.53	49.8	-0.825334	0.00168263	0.0329636	Xylb
Cpsf2|100kDa|2610024B04Rik|AI662483|Cpsf|MCPSF|mKIAA1367|-|12|12 F1|protein-coding	4580.45	3754.27	4330.69	3777.77	-0.252853	0.00169083	0.0330565	Cpsf2
Deptor|Depdc6|-|15 D1|15 21.96 cM|protein-coding	3718.76	3050.76	3938.85	3400.29	-0.259139	0.00168968	0.0330565	Deptor
Mapt|AI413597|AW045860|Mtapt|Tau|-|11 67.79 cM|11 E1|protein-coding	5.71	0	5.58	0	-5.53361	0.00170461	0.0332987	Mapt
Mmp23|CA-MMP|-|4|4 E2|protein-coding	12.57	22.91	13.03	42.83	1.33214	0.00171101	0.0333695	Mmp23
Snhg20|2810008D09Rik|-|11|11|ncRNA	306.28	442.91	399.28	652.37	0.617186	0.00170969	0.0333695	Snhg20
Mmp14|AI325305|MT-MMP-1|MT1-MMP|sabe|-|14 C2|14 27.79 cM|protein-coding	25.14	49.64	42.81	136.45	1.41884	0.00171696	0.0334585	Mmp14
Sirt7|-|-|11|11 E2|protein-coding	1742.81	2058.98	1718.13	2131.41	0.265378	0.00173989	0.0338779	Sirt7
Slc41a3|1010001P06Rik|AI480742|SLC41A1-L2|-|6|6 D2|protein-coding	339.42	237.68	308.07	226.09	-0.488861	0.00174362	0.0338955	Slc41a3
Slc50a1|MmSWEET1|Rag1ap1|Rga|-|3 F1|3 39.04 cM|protein-coding	332.56	530.73	421.62	521.9	0.467409	0.00174221	0.0338955	Slc50a1
Stard4|4632419C16Rik|9030213J02Rik|AA517649|AW324468|-|18 B1|18 18.18 cM|protein-coding	1830.81	1472.88	1948.02	1654.33	-0.285175	0.00175254	0.0340414	Stard4
Wdr77|2610003I18Rik|2610312E17Rik|C79984|p44/MEP50|-|3|3 F2.2|protein-coding	4850.16	5683.42	4626.66	5659.18	0.249077	0.00175417	0.0340456	Wdr77
Rftn1|2310015N21Rik|AI853526|-|17|17 C|protein-coding	1842.24	2429.34	1701.38	2060.69	0.333572	0.00175581	0.03405	Rftn1
Gm5127|B130007I08|EG331493|-|X|X D|protein-coding	6.86	22.91	7.45	17.93	1.48633	0.00176203	0.034143	Gm5127
Nr1h2|AI194859|LXR|LXRB|LXRBSV|LXRbeta|NER1|OR-1|RIP15|UR|Unr|Unr2|-|7|7 B4|protein-coding	2351.94	2886.58	2267.26	2724.02	0.271155	0.00177342	0.0343361	Nr1h2
Hic1|AA408311|HIC-1|-|11 B5|11 45.76 cM|protein-coding	18.29	31.5	11.17	34.86	1.182	0.00177794	0.0343682	Hic1
Ptprf|AA591035|LAR|LARS|RPTP-LAR|-|4|4 C6-D1|protein-coding	6570.11	9185.69	7457.95	8171.05	0.298445	0.0017768	0.0343682	Ptprf
Trim36|D18Wsu100e|haprin|-|18 C|18 24.41 cM|protein-coding	120	187.09	137.75	198.2	0.564397	0.00181451	0.035047	Trim36
Chml|AI450814|E030003F13Rik|REP-2|Rep2|-|1 81.7 cM|1 H5-H6|protein-coding	238.85	177.55	242.92	157.37	-0.533027	0.00182418	0.035197	Chml
Il5ra|CD125|CDw125|Il5r|-|6 E1|6 49.19 cM|protein-coding	33.14	14.32	24.2	8.96	-1.28058	0.0018252	0.035197	Il5ra
Hus1|-|-|11 A1|11 5.74 cM|protein-coding	1382.82	1035.69	1277.89	1126.46	-0.309906	0.00183917	0.035438	Hus1
Erlin1|2810439N09Rik|C80197|Keo4|Spfh1|-|19|19 C3|protein-coding	1090.26	909.69	1233.22	957.14	-0.327651	0.00184396	0.0355017	Erlin1
Igsf9|644ETD8|Dasm1|Kiaa1355-hp|NRT1|Ncaml|mKIAA1355|-|1 H3|1 79.86 cM|protein-coding	21.71	49.64	28.85	49.8	0.947619	0.00184708	0.0355334	Igsf9
Ssbp2|1500004K09Rik|2310079I02Rik|9330163K02Rik|A830008M03Rik|AU067692|AW558684|Hspc116|SSDP2|-|13|13 C3|protein-coding	677.7	920.19	653.37	817.7	0.37648	0.00185052	0.0355712	Ssbp2
Podnl1|5832418A03Rik|Gm506|-|8|8 C3|protein-coding	231.99	349.37	297.83	428.27	0.536644	0.00185264	0.0355833	Podnl1
Il12rb1|CD212|IL-12R[b]|-|8 B3.3|8 34.21 cM|protein-coding	1710.81	2183.07	1280.69	1859.5	0.426568	0.00186956	0.0358798	Il12rb1
Lgals1|AA410090|Gal-1|Galbp|L-14.5|L14|Lect14|galectin-1|-|15 37.7 cM|15 E|protein-coding	13625.9	17172.5	11990.6	14925.8	0.316392	0.00187732	0.036	Lgals1
St8sia4|PST|PST-1|SIAT8-D|ST8SiaIV|Siat8d|-|1|1 D|protein-coding	1436.53	1088.19	1644.6	1347.57	-0.352618	0.00188495	0.0361174	St8sia4
Nuak2|1200013B22Rik|Omphk2|Snark|mKIAA0537|-|1|1 E4|protein-coding	249.14	188.05	290.39	193.22	-0.514093	0.00189067	0.036185	Nuak2
Ppp2r3a|3222402P14Rik|A730042E07|-|9|9 E4|protein-coding	173.71	110.73	203.83	139.44	-0.609747	0.00189149	0.036185	Ppp2r3a
Tmem80|5530601I19Rik|-|7|7 F5|protein-coding	244.56	342.69	295.04	460.14	0.556384	0.00189432	0.0362104	Tmem80
Ankrd50|AI662170|E430012K20Rik|mKIAA1223|mKIAA3019|-|3|3 B|protein-coding	219.42	294	191.73	291.82	0.504064	0.00191714	0.0366175	Ankrd50
Cse1l|2610100P18Rik|AA407533|Capts|Cas|Xpo2|-|2 H3|2 87.22 cM|protein-coding	6520.97	5489.65	6398.78	5535.68	-0.239177	0.00193745	0.0369761	Cse1l
Hist1h2an|-|-|13|13 A3.1|protein-coding	1913.09	1740.15	2265.4	1651.34	-0.311332	0.00194282	0.0370407	Hist1h2an
Trim47|2210023F24Rik|-|11|11 E2|protein-coding	3.43	11.45	8.38	36.85	1.94906	0.00194392	0.0370407	Trim47
Lrrfip1|AU024550|Fliiap1|-|1|1 D|protein-coding	4933.58	4030.13	4707.64	4164.21	-0.245232	0.00198186	0.037704	Lrrfip1
Cilp2|1110031K21Rik|AA407300|CLIP-2|-|8|8 B3.3|protein-coding	2.29	9.55	3.72	16.93	2.04701	0.00198074	0.037704	Cilp2
B4galt4|9130402O08Rik|B4galt-IV|b4Gal-T4|beta4Gal-T4|beta4GalT-IV|-|16|16 B4|protein-coding	641.13	501.14	785.54	572.69	-0.423498	0.00198989	0.0378267	B4galt4
Nfia|1110047K16Rik|9430022M17Rik|CTF|NF1-A|NF1A|-|4 45.52 cM|4 C4-C6|protein-coding	45.71	72.55	43.74	82.67	0.783829	0.00199349	0.0378353	Nfia
Adamts1|ADAM-TS1|ADAMTS|ADAMTS-1|C3-C5|METH-1|METH1|-|16 48.2 cM|16 C3-C5|protein-coding	9.14	17.18	9.31	37.85	1.54296	0.00199237	0.0378353	Adamts1
Lonrf3|4932412G04Rik|5730439E01Rik|A830039N02Rik|AU023707|Rnf127|-|X|X A2|protein-coding	0	7.64	0.93	5.98	3.43955	0.00199844	0.0378995	Lonrf3
Nkain1|2610200G18Rik|2810426C15Rik|-|4|4 D3|protein-coding	34.28	13.36	33.51	17.93	-1.12201	0.00201204	0.0381199	Nkain1
Larp4|DXErtd793|DXErtd793e|-|15|15 F1|protein-coding	5596.42	4557.05	5414.99	4827.53	-0.241635	0.00201324	0.0381199	Larp4
Csk|AW212630|p50CSK|-|9 B|9 31.18 cM|protein-coding	8565.48	10818	9207.72	10455.8	0.249529	0.00202479	0.0383084	Csk
Cxadr|2610206D03Rik|AU016810|AW553441|CAR|MCAR|MCVADR|-|16|16 C|protein-coding	6.86	23.86	12.1	24.9	1.30855	0.00203662	0.0385021	Cxadr
Sox13|AA407916|AW259412|AW540933|Sox-13|-|1|1 E4|protein-coding	1953.09	2775.85	1641.81	2081.61	0.427539	0.00204164	0.0385666	Sox13
Shisa2|9430059P22Rik|MAd2|Tmem46|mShisa|shisa|-|14|14 D1|protein-coding	139.42	255.82	211.28	299.79	0.644585	0.0020609	0.0388423	Shisa2
Pfkp|1200015H23Rik|9330125N24Rik|ATP-PFK|PFK-C|PFK-P|-|13|13 A1|protein-coding	1481.1	1200.83	1473.35	1245.98	-0.282592	0.00206075	0.0388423	Pfkp
Tbc1d24|9630033P11|C530046L02Rik|mKIAA1171|-|17|17 A3.3|protein-coding	252.56	170.87	300.63	211.15	-0.54958	0.00206108	0.0388423	Tbc1d24
Csf3r|Cd114|Csfgr|G-CSF-R|G-CSFR|-|4 D2.2|4 59.77 cM|protein-coding	17.14	6.68	17.68	3.98	-1.68781	0.00207235	0.0390242	Csf3r
Dhx37|Gm1050|Gm451|mKIAA1517|-|5|5 G1.1|protein-coding	2261.65	1838.47	2153.71	1866.47	-0.26319	0.00207604	0.0390325	Dhx37
Mapre2|AI314113|C820009F03Rik|D18Abb1e|EB1|EB2|RP1|-|18 A2|18 12.08 cM|protein-coding	2094.8	1726.79	2077.39	1782.81	-0.260062	0.0020752	0.0390325	Mapre2
Napepld|A530089G06|Mbldc1|NAPE-PLD|-|5|5 A3|protein-coding	166.85	126.96	190.8	111.55	-0.595414	0.00207792	0.0390373	Napepld
Ndst1|1200015G06Rik|Hsst|NDST-1|b2b2230Clo|-|18|18 D2|protein-coding	4927.87	4117	4571.75	3795.69	-0.272985	0.0020846	0.0391323	Ndst1
Adam19|AL024287|MADDAM|MTLNB|Mltnb|-|11 27.54 cM|11 A5-B1.1|protein-coding	303.99	449.6	396.49	572.69	0.528945	0.00210369	0.0393983	Adam19
Boll|4930554P13Rik|4930597B14Rik|-|1|1 C1|protein-coding	1.14	10.5	1.86	7.97	2.48848	0.00210252	0.0393983	Boll
Fgf3|Fgf-3|Int-2|Int-P|-|7 F5|7 88.85 cM|protein-coding	3362.2	2528.62	4260.89	3342.52	-0.390163	0.00210222	0.0393983	Fgf3
Spns2|-|-|11|11 B4|protein-coding	2839.92	2289.98	2945.76	2584.58	-0.25915	0.00211138	0.039411	Spns2
Pou2af1|BOB.1|Bob-1|Bob1|OBF-1|OBF.1|OCA-B|OCAB|-|9|9 A5.3|protein-coding	29.71	72.55	37.23	53.78	0.898005	0.00211011	0.039411	Pou2af1
Erg|D030036I24Rik|-|16 C4|16 56.04 cM|protein-coding	3949.61	3365.76	3986.32	3399.29	-0.240734	0.00210944	0.039411	Erg
Klrb1c|AI462337|CD161|Ly-59|Ly55c|Ly59|NK-RP1|NK1.1|NKR-P1.9|NKRP1|NKRP140|Nk-1|Nk-1.2|Nk1|Nk1.2|Nkrp1c|ly-55c|-|6 F3|6 63.09 cM|protein-coding	1.14	7.64	1.86	10.96	2.48898	0.00211256	0.039411	Klrb1c
Cycs|-|-|6 B2.3|6 24.32 cM|protein-coding	5727.85	4670.64	5516.44	4919.16	-0.240547	0.00211164	0.039411	Cycs
Nasp|5033430J04Rik|AI131596|AI317140|D4Ertd767e|Epcs32|Nasp-T|-|4 D1|4 53.24 cM|protein-coding	7548.37	6092.93	6825.05	5984.87	-0.261252	0.00211563	0.039416	Nasp
Fhl2|FHL-2|SLIM-3|SLIM3|-|1|1 B|protein-coding	319.99	420	305.28	425.29	0.425681	0.00211611	0.039416	Fhl2
Igfbp7|AGM|Fstl2|Mac25|-|5|5 C3.3|protein-coding	148.57	209.05	174.98	301.78	0.640721	0.00212752	0.039598	Igfbp7
Znf41-ps|1700029I01Rik|-|4|4 E1|pseudo	2180.51	1637.06	1980.6	1807.71	-0.283527	0.00213419	0.0396913	Znf41-ps
Golm1|2310001L02Rik|AW125446|D030064E01Rik|GP73|Golph2|PSEC0257|-|13|13 B3|protein-coding	1201.11	930.69	1330.95	1098.57	-0.332417	0.00214307	0.0398257	Golm1
Cxcr6|BB217514|BONZO|STRL33|-|9 74.57 cM|9 F|protein-coding	2.29	5.73	2.79	23.9	2.45106	0.00216828	0.0402631	Cxcr6
Tmem254a|0610008K04Rik|0610010A22Rik|AA960404|D14Ertd449e|Tmem254|-|14 15.19 cM|14 B|protein-coding	3969.04	4746.05	3670.8	4493.88	0.26483	0.00219133	0.0406596	Tmem254a
Hist1h2bj|-|-|13|13 A2-A3|protein-coding	174.85	122.18	162.88	97.61	-0.624608	0.00219938	0.0406835	Hist1h2bj
Sec31b|Gm341|Sec31l2|-|19|19 C3|protein-coding	137.14	76.36	96.8	56.77	-0.811819	0.0021993	0.0406835	Sec31b
Themis|E430004N04Rik|Gasp|Spot|Tsepa|thylex|-|10|10 A4|protein-coding	91.43	119.32	88.42	185.25	0.744418	0.00219861	0.0406835	Themis
2610305D13Rik|Ssm1b|-|4|4 E1|protein-coding	84.57	49.64	95.87	60.76	-0.724471	0.00219518	0.0406835	2610305D13Rik
Fam101b|1500005K14Rik|RefilinB|cfm|-|11|11 B4|protein-coding	94.85	60.14	94.93	57.77	-0.694949	0.00220581	0.040771	Fam101b
Crebzf|1110034C16Rik|6330417B10Rik|LAZip|LAZipII|SMILE|Zf|-|7|7 E1|protein-coding	3233.06	3983.36	3766.67	4680.13	0.295183	0.00221199	0.0408538	Crebzf
Tmem254c|ENSMUSG00000072676|Gm10395|-|14 A3|14|protein-coding	3969.04	4746.05	3673.6	4493.88	0.264302	0.00222043	0.0409469	Tmem254c
Rnf149|1600023E10Rik|AV037261|C76763|Gm15832|Greul4|OTTMUSG00000026591|-|1|1 B|protein-coding	1513.1	1172.19	1405.4	1227.05	-0.292787	0.00221883	0.0409469	Rnf149
Zfp709|BC021921|GIOT-4|HIT-40|-|8|8 B3.3|protein-coding	532.56	379.91	484.91	390.43	-0.410396	0.00222562	0.0409939	Zfp709
Fabp4|422/aP2|ALBP/Ap2|Ap2|Lbpl|-|3 A1|3 2.56 cM|protein-coding	10.29	18.14	9.31	36.85	1.46348	0.00222639	0.0409939	Fabp4
Zfp219|2010302A17Rik|-|14|14 C2|protein-coding	1602.24	2185.93	1923.82	2189.17	0.299937	0.002239	0.0411945	Zfp219
Smad3|AU022421|Madh3|-|9|9 D|protein-coding	1997.66	2494.25	2061.57	2401.32	0.260264	0.00225127	0.0413438	Smad3
2810474O19Rik|6720435I21Rik|AA536804|AU020969|GET|Kiaa1551|-|6|6 G3|protein-coding	1858.24	2233.66	2086.7	2662.27	0.298567	0.00225227	0.0413438	2810474O19Rik
Tmem254b|ENSMUSG00000021867|Gm9746|-|14 A3|14|protein-coding	3971.32	4745.1	3670.8	4493.88	0.264248	0.00225186	0.0413438	Tmem254b
Cnn2|AA408047|AI324678|Calpo2|-|10|10 C1|protein-coding	2556.5	3255.99	2847.11	3257.86	0.258815	0.0022549	0.0413527	Cnn2
Csrnp1|4931429D10Rik|Axud1|CSRNP-1|URAX1|taip-3|-|9|9 F4|protein-coding	1727.95	2186.89	1705.1	2010.89	0.281021	0.0022562	0.0413527	Csrnp1
Armcx2|3230401N03Rik|AI043003|ALEX2|-|X|X E3|protein-coding	271.99	359.87	305.28	467.12	0.503089	0.00226492	0.041481	Armcx2
Iffo2|C79267|-|4|4 D3|protein-coding	174.85	241.5	159.15	239.04	0.517367	0.00226747	0.0414961	Iffo2
Tmem98|6530411B15Rik|AI463522|-|11|11 B5|protein-coding	1.14	4.77	0.93	11.95	2.86069	0.00227843	0.0416649	Tmem98
Slc14a1|2610507K20Rik|3021401A05Rik|UT-B|Utb1|-|18|18 E3|protein-coding	2363.37	3118.53	2145.33	2593.54	0.333451	0.00228365	0.0417287	Slc14a1
Rexo2|1810038D15Rik|AW107347|Sfn|Smfn|-|9|9 A5.3|protein-coding	3306.2	3928	3386	4024.77	0.238287	0.00228771	0.0417711	Rexo2
Mbd2|MBD2a|-|18 E2|18 44.54 cM|protein-coding	3849.04	4582.82	3768.53	4496.87	0.243299	0.00229271	0.0418306	Mbd2
Phf1|AW557215|D17Ertd455e|Pcl1|Phf2|Tctex3|-|17 A3.3|17 13.6 cM|protein-coding	346.28	461.05	361.12	483.05	0.404712	0.00229911	0.0419156	Phf1
2700081O15Rik|AI255177|AI848741|AW742297|-|19|19 A|protein-coding	1027.4	1208.47	1061.96	1405.33	0.310584	0.00230946	0.0420725	2700081O15Rik
Ccnd3|9230106B05Rik|AA682053|AL024085|AW146355|C78795|-|17 C|17 23.37 cM|protein-coding	11540.3	14566.5	11053.4	12953.8	0.275547	0.00232379	0.0422622	Ccnd3
Prex1|G630042G04|P-REX1|Setd6|-|2|2 H3|protein-coding	6829.53	6014.65	6941.39	5657.19	-0.248163	0.00232635	0.0422622	Prex1
Cdh13|4932416G01Rik|Cdht|Tcad|-|8 E1|8 65.97 cM|protein-coding	1.14	6.68	2.79	15.94	2.37781	0.00232691	0.0422622	Cdh13
Col8a1|Col8a-1|-|16|16 C1.1|protein-coding	8	21	17.68	64.74	1.68316	0.00232612	0.0422622	Col8a1
Rbm15b|1810017N16Rik|-|9|9 F1|protein-coding	2406.79	3094.67	2561.37	2905.29	0.262437	0.00233796	0.042431	Rbm15b
Taf1|AU015687|B430306D02Rik|Ccg-1|Ccg1|KAT4|N-TAF1|TAFII250|Taf2a|p250|-|X D|X 44.29 cM|protein-coding	4299.31	3595.81	4169.67	3623.39	-0.240671	0.00234056	0.0424461	Taf1
Snx10|2410004M09Rik|-|6|6 B3|protein-coding	1117.68	899.19	1162.48	963.12	-0.303515	0.0023492	0.0425705	Snx10
Fstl3|E030038F23Rik|Flrg|-|10|10 C1|protein-coding	470.84	357.96	549.13	405.37	-0.431789	0.0023797	0.0430584	Fstl3
Ccdc88a|A430106J12Rik|AI848406|Ape|C130096N06Rik|C330012F17Rik|D130005J21Rik|Girdin|Giv|Grdn|Hkrp1|-|11|11 A3.3|protein-coding	732.55	545.05	723.18	602.57	-0.354315	0.00237833	0.0430584	Ccdc88a
Bgn|BG|DSPG1|PG-S1|PGI|SLRR1A|-|X 37.33 cM|X B|protein-coding	191.99	275.87	295.97	887.42	1.22961	0.00239198	0.0432156	Bgn
Atp1b3|AA409958|AI664000|AW212096|-|9 E3.3|9 50.31 cM|protein-coding	12037.4	14521.6	11334.4	13600.2	0.25723	0.00239151	0.0432156	Atp1b3
B230312C02Rik|-|-|2|2 H4|ncRNA	2.29	0	8.38	0	-5.50845	0.0023979	0.04329	B230312C02Rik
Ppp1r12a|1200015F06Rik|5730577I22Rik|AA792106|AV099298|D10Ertd625e|Mypt1|-|10 56.33 cM|10 C|protein-coding	2987.35	3561.45	2795.92	3407.26	0.259511	0.00240128	0.0433186	Ppp1r12a
Sparc|BM-40|ON|-|11 33.04 cM|11 B1|protein-coding	113.14	180.41	199.18	669.3	1.41827	0.0024152	0.043537	Sparc
Sepp1|AU018766|D15Ucla1|Se-P|selp|-|15 A1|15 1.84 cM|protein-coding	1886.81	1551.15	2194.66	1784.8	-0.30364	0.0024191	0.0435746	Sepp1
Tcf12|A130037E08Rik|ALF1|HEB|HEBAlt|HTF-4|HTF4|ME1|REB|bHLHb20|-|9 D|9 39.85 cM|protein-coding	6902.67	7888.45	6419.25	8007.71	0.244333	0.00242195	0.0435934	Tcf12
Snora34|MBI-89|-|15|15|snoRNA	12.57	1.91	10.24	2.99	-2.16814	0.00242546	0.0436237	Snora34
Hist1h2ac|-|-|13|13 A2-A3|protein-coding	2202.23	2037.98	2611.63	1877.43	-0.307752	0.00244238	0.0438952	Hist1h2ac
Inafm1|2610014I16Rik|Prr24|-|7|7 A2|protein-coding	294.85	368.46	286.67	428.27	0.442718	0.00244421	0.0438954	Inafm1
Piwil2|Piwil1l|mili|-|14|14 D2|protein-coding	109.71	47.73	57.71	26.89	-1.15892	0.00244672	0.0439076	Piwil2
Hsd11b1|-|-|1|1 H6|protein-coding	245.71	343.64	245.71	331.66	0.448827	0.00245078	0.0439478	Hsd11b1
Sun2|B230369L08Rik|C030011B15|Unc84b|-|15|15 E1|protein-coding	14598.5	18588.1	15289.1	17237.5	0.252113	0.00247501	0.0442589	Sun2
Gas1|AW554192|Gas-1|-|13 31.92 cM|13 B3-C2|protein-coding	35.43	60.14	53.05	165.33	1.31929	0.00247076	0.0442589	Gas1
Rbm3os|2900002K06Rik|-|X|X|ncRNA	1356.53	1239.97	1577.59	1084.63	-0.345234	0.00247734	0.0442589	Rbm3os
Enthd1|Gm1242|Gm86|-|15|15 E1|protein-coding	18.29	4.77	13.03	3.98	-1.79905	0.002476	0.0442589	Enthd1
Flnc|1110055E19Rik|ABP-280|ABPL|Fln2|-|6 A3.3|6 12.36 cM|protein-coding	26.29	41.05	31.64	94.62	1.19873	0.00247505	0.0442589	Flnc
Klf13|0610043C13Rik|9430029L20Rik|Bteb3|FKLF-2|FKLF2|NSLP1|RFLAT-1|RFLAT1|-|7|7 C|protein-coding	3299.34	4064.5	3494.89	4030.75	0.242367	0.00247918	0.0442589	Klf13
Nudt16|2310041H06Rik|2810047L04Rik|2900006H04Rik|AI851783|-|9|9 F1|protein-coding	431.99	589.92	465.37	584.64	0.376881	0.00248269	0.0442887	Nudt16
Gfi1b|Gfi-1B|-|2|2 A3|protein-coding	299.42	165.14	366.71	261.94	-0.658429	0.00250258	0.0446104	Gfi1b
Fnip2|D630023B12Rik|mKIAA1450|-|3|3 E3|protein-coding	281.14	384.69	295.04	393.41	0.421796	0.00252249	0.0449321	Fnip2
Rps25|2810009D21Rik|-|9|9 A5.2|protein-coding	19080.6	17238.3	20977.8	16722.6	-0.247954	0.00253643	0.0451135	Rps25
Hist1h2af|H2a-221|-|13|13 A3.1|protein-coding	1923.38	1749.7	2312.87	1704.13	-0.305212	0.00253552	0.0451135	Hist1h2af
Nid1|A630025O17|Nid|entactin|entactin-1|nidogen-1|-|13 A1|13 5.26 cM|protein-coding	26.29	59.18	59.57	217.12	1.65236	0.00254447	0.0452231	Nid1
Pde5a|Cgbpde|Cn5n|PDE5a2|Pde5|Pde5a1|-|3|3 G1|protein-coding	72	108.82	81.9	140.43	0.676873	0.00257265	0.0456902	Pde5a
Cacna1e|A430040I15|BII|Cach6|Cacnl1a6|Cav2.3|Cchra1|alpha1E|-|1 G3|1 66.14 cM|protein-coding	1.14	6.68	4.65	25.9	2.35438	0.00257809	0.045753	Cacna1e
Gjb3|Cnx31|Cx31|D4Wsu144e|Gjb-3|-|4 D2.2|4 61.48 cM|protein-coding	49.14	23.86	55.84	32.87	-0.904451	0.00258362	0.0457836	Gjb3
Npr2|GC-B|GC-B2|GC-B3|cn|mNPR-B|pwe|-|4 B1|4 23.05 cM|protein-coding	5.71	11.45	3.72	22.91	1.84434	0.00258279	0.0457836	Npr2
Fdft1|SQS|SS|-|14 D1|14 33.24 cM|protein-coding	1985.09	1581.7	1775.83	1507.92	-0.292692	0.00259268	0.04589	Fdft1
Abcg1|AW413978|Abc8|White|-|17|17|protein-coding	2109.66	1869.02	2494.36	1931.21	-0.288142	0.00259344	0.04589	Abcg1
Hist1h2bn|-|-|13|13 A2-A3|protein-coding	163.42	111.68	145.19	86.65	-0.641272	0.00259902	0.0459548	Hist1h2bn
Morc3|1110051N18Rik|AI452146|BF318192|D16Jhu32e|NXP2|Zcwcc3|-|16|16 C4|protein-coding	1780.52	1435.65	1844.71	1593.57	-0.270927	0.00262525	0.0463845	Morc3
Parm1|2210012L08Rik|9130213B05Rik|W91666|-|5|5 E2|protein-coding	46.86	90.68	73.53	124.5	0.809244	0.00264511	0.0467011	Parm1
Uhrf1bp1|1110020K19Rik|AA408674|F830021D11Rik|mKIAA4127|-|17|17 A3.3|protein-coding	1367.96	1085.33	1262.07	1064.71	-0.299944	0.00264769	0.0467124	Uhrf1bp1
Stk26|2610018G03Rik|Mst4|-|X|X A3.3|protein-coding	3559.9	2646.98	3357.15	3128.39	-0.272509	0.00265423	0.0467934	Stk26
Dock4|5330406C03|6330411N01Rik|AF263288|C030023J22|mKIAA0716|-|12 B1|12 18.06 cM|protein-coding	36.57	65.86	40.95	69.72	0.788505	0.00266516	0.0469517	Dock4
Hfe|MR2|-|13 9.88 cM|13 A2-A4|protein-coding	153.14	88.77	121.93	87.65	-0.644104	0.00267062	0.0470134	Hfe
Gm14295|OTTMUSG00000016219|-|2 H4|2|protein-coding	369.13	260.59	347.16	272.9	-0.434422	0.00269064	0.0473313	Gm14295
Tmem55a|2610319K07Rik|AI315591|AV001360|-|4|4 A1-A2|protein-coding	603.41	771.28	630.1	798.78	0.336681	0.00269604	0.0473916	Tmem55a
BC037034|-|-|5|5 G2|protein-coding	2148.51	2554.39	2285.88	2763.86	0.250557	0.00270909	0.0475861	BC037034
Cops2|AI315723|C85265|Csn2|Sgn2|TRIP-15|Trip15|-|2 F1|2 61.76 cM|protein-coding	3383.91	2626.94	3272.45	2994.92	-0.255507	0.00271488	0.0476183	Cops2
Ipmk|2410017C19Rik|AA408208|Impk|-|10|10 B5.2|protein-coding	1418.25	1168.38	1599	1301.75	-0.301081	0.00271469	0.0476183	Ipmk
Naip1|AV364616|Birc1a|D13Lsd1|Naip|Naip-rs1|-|13 53.18 cM|13 D1-D3|protein-coding	65.14	110.73	76.32	113.54	0.647322	0.00272066	0.0476332	Naip1
Unc93b1|Unc-93B1|Unc93b|-|19|19 A|protein-coding	3787.33	3275.08	3606.58	2687.16	-0.318371	0.00272167	0.0476332	Unc93b1
Arhgap9|AU043488|-|10|10 D3|protein-coding	4439.88	5519.24	4579.2	5235.89	0.244257	0.00271851	0.0476332	Arhgap9
Myh14|2400004E04Rik|II-C|NHMCII|NMHC II-C|-|7|7 B2|protein-coding	11.43	26.73	18.61	41.83	1.14307	0.00272425	0.0476437	Myh14
Ptges|2410099E23Rik|D2Ertd369e|Pges|mPGES|mPGES-1|-|2 B|2 21.75 cM|protein-coding	8	18.14	8.38	26.89	1.42759	0.00274843	0.0480316	Ptges
Stk10|Gek1|Lok|mKIAA4026|-|11 18.97 cM|11 A4|protein-coding	3035.35	3731.36	2945.76	3465.03	0.257579	0.00277369	0.0483825	Stk10
Sh3bgrl|1190008F14Rik|-|X|X D|protein-coding	4977.01	4297.41	5415.92	4563.6	-0.241194	0.00277133	0.0483825	Sh3bgrl
Cd53|AI323659|Ox-44|Tspan25|-|3 F2.3|3 46.53 cM|protein-coding	4158.75	4697.37	3587.04	4734.91	0.273923	0.00277454	0.0483825	Cd53
Prps1|2310010D17Rik|C76571|C76678|PRS-I|Prps-1|-|X 61.35 cM|X F1-F2|protein-coding	2812.5	2285.21	2681.44	2376.42	-0.247522	0.00277735	0.0483933	Prps1
5830418P13Rik|-|-|9 55.37 cM|9 F1|ncRNA	1553.1	1853.75	1379.34	1771.86	0.297295	0.00277919	0.0483933	5830418P13Rik
Gimap9|A630002K24|BB145400|-|6|6 B2.3|protein-coding	1753.1	2072.34	1767.46	2151.33	0.251912	0.00278254	0.0484166	Gimap9
Fbxo31|1110003O08Rik|2310046N15Rik|Fbx14|Fbxo14|-|8|8 E1|protein-coding	1363.39	1729.65	1513.37	1783.81	0.27686	0.00279693	0.0486319	Fbxo31
Tssk6|Sstk|-|8|8 C1|protein-coding	166.85	261.55	187.08	244.02	0.50193	0.00281528	0.0489155	Tssk6
Comp|TSP5|-|8 B3.3|8 34.15 cM|protein-coding	32	49.64	26.06	57.77	0.883325	0.00284361	0.049372	Comp
Il17d|AI462269|IL-17D|Il27a|-|14|14 C3|protein-coding	22.86	8.59	29.78	13.94	-1.2436	0.00285594	0.0495265	Il17d
Rara|Nr1b1|RAR|RARalpha1|-|11 62.76 cM|11 D-E1|protein-coding	677.7	889.65	513.76	766.91	0.46896	0.00285663	0.0495265	Rara
Inpp5j|Pib5pa|Pipp|-|11|11 A1|protein-coding	6.86	0	9.31	1.99	-2.92477	0.0028601	0.049551	Inpp5j
Dlg5|4933429D20Rik|T25557|mKIAA0583|-|14|14 A3|protein-coding	13.71	26.73	20.48	53.78	1.19388	0.00286352	0.0495745	Dlg5
Penk|AI326464|ENK|PPA|Penk1|-|4 A1|4 2.31 cM|protein-coding	0	8.59	0	1.99	5.45044	0.00287133	0.049674	Penk
Gca|5133401E04Rik|AI573844|-|2|2 C1.3|protein-coding	85.71	53.46	94	58.76	-0.692638	0.00290286	0.0501834	Gca
Bend4|D330027G24Rik|EG666938|-|5 C3.1|5|protein-coding	639.98	420.96	698.05	570.7	-0.446823	0.00291018	0.0502401	Bend4
Errfi1|1300002F13Rik|AI788755|Mig-6|Mig6|RALT|-|4|4 E1|protein-coding	54.86	78.27	53.05	101.59	0.723861	0.00291032	0.0502401	Errfi1
Trp53i11|Tp53i11|-|2|2 E1|protein-coding	5340.43	6935.8	5046.42	5886.26	0.295479	0.00292676	0.0504876	Trp53i11
Runx1|AML1|CBF-alpha-2|Cbfa2|Pebp2a2|Pebpa2b|-|16 C4|16 53.7 cM|protein-coding	5704.99	5004.73	5923.17	4966.97	-0.23196	0.00293072	0.0505197	Runx1
Nphp3|3632410F03Rik|AI550417|C230078J01|D330020E01Rik|pcy|-|9 F1|9 56.11 cM|protein-coding	96	63.96	100.52	59.76	-0.677054	0.00293571	0.0505694	Nphp3
Cd74|CLIP|DHLAG|HLADG|Ia-GAMMA|Ii|-|18 E1|18 34.41 cM|protein-coding	77.71	37.23	46.54	18.92	-1.13477	0.00294055	0.0506166	Cd74
Prr11|B930067F20Rik|-|11|11 C|protein-coding	1749.67	1402.24	1825.16	1580.63	-0.273211	0.00297369	0.051114	Prr11
Slc31a1|4930445G01Rik|AI787263|AU016967|Ctr1|-|4|4 C1-C2|protein-coding	1746.24	1456.65	1661.35	1357.53	-0.285035	0.00297363	0.051114	Slc31a1
Zfp580|1500015O20Rik|AI838225|Znf580|-|7|7 A1|protein-coding	68.57	115.5	62.36	96.61	0.691241	0.00298445	0.0512256	Zfp580
Gm11978|OTTMUSG00000005125|OTTMUSG00000005127|-|11|11 A1|pseudo	5.71	15.27	4.65	16.93	1.61422	0.00298445	0.0512256	Gm11978
Olfml2a|4932431K08Rik|mFLJ00237|-|2|2 B|protein-coding	3.43	10.5	4.65	18.92	1.79609	0.00298835	0.0512559	Olfml2a
Elf4|AV314029|BC042423|ENSMUSG00000053512|Gm9907|Mef|-|X|X A3.2|protein-coding	4556.45	5493.47	4563.37	5320.55	0.235899	0.00300375	0.0514834	Elf4
Rapgef2|5830453M24Rik|CNRasGEF|Pdzgef1|RA-GEF-1|mKIAA0313|nRapGEP|-|3|3 E3|protein-coding	4602.16	5417.1	4097.08	5127.33	0.267933	0.00302415	0.0517593	Rapgef2
Ccdc91|1700086G08Rik|1810060J02Rik|AU045683|AW555238|p56|-|6|6 G3|protein-coding	252.56	353.19	286.67	385.45	0.43971	0.00302392	0.0517593	Ccdc91
Rad18|2810024C04Rik|Rad18sc|-|6|6 F|protein-coding	1438.82	1194.15	1497.55	1253.94	-0.273562	0.00303245	0.0518643	Rad18
Lonp2|1300002A08Rik|AU015403|Lonp|-|8|8 C3|protein-coding	1596.53	1971.16	1575.73	1870.46	0.266736	0.00305383	0.0521929	Lonp2
Klf10|AI115143|EGR[a]|Egral|Gdnfif|TIEG-1|Tieg|Tieg1|mGIF|-|15|15 B3.1|protein-coding	485.7	679.64	594.74	751.97	0.39187	0.00306067	0.0522727	Klf10
Tpi1|AI255506|Tpi|Tpi-1|-|6 F2|6 59.17 cM|protein-coding	9966.59	8760.91	10028.6	8299.53	-0.238674	0.00306358	0.0522853	Tpi1
Casc5|2310043D08Rik|5730505K17Rik|-|2|2 E5|protein-coding	2682.21	2156.34	2612.56	2342.55	-0.246158	0.00306928	0.0523454	Casc5
Casp8ap2|AA387232|D4Ertd659e|FLASH|mKIAA1315|-|4 A5|4 14.27 cM|protein-coding	3495.91	2883.71	3449.29	3063.65	-0.23475	0.00308089	0.0525062	Casp8ap2
Synpo|9030217H17Rik|9130229N11|9330140I15Rik|AW046661|-|18|18 D3|protein-coding	21.71	46.77	39.09	84.66	1.07352	0.00309329	0.0526428	Synpo
Acadsb|1300003O09Rik|2-MEBCAD|BB066609|SBCAD|-|7|7 F4|protein-coding	897.12	726.42	890.71	717.11	-0.318476	0.0030912	0.0526428	Acadsb
Abcc2|AI173996|Abc30|Cmoat|Mrp2|cMRP|-|19 C3|19 36.67 cM|protein-coding	10.29	0.95	5.58	1	-2.85058	0.00310585	0.0528192	Abcc2
Pcyox1|1200015P13Rik|AI115532|AI448340|PCL1|Pcly|-|6|6 D1|protein-coding	1041.11	869.6	1114.08	893.4	-0.301047	0.00310833	0.052824	Pcyox1
Zxdb|Zxda|-|X|X C3|protein-coding	771.41	956.46	823.7	1039.81	0.311456	0.00314159	0.0533516	Zxdb
Slmo1|A230074A19Rik|BC019561|-|18|18 E1|protein-coding	5.71	0	4.65	0	-5.40189	0.00315039	0.0534633	Slmo1
Runx2|AML3|Cbf|Cbfa-1|Cbfa1|LS3|Osf2|PEBP2aA|Pebp2a1|Pebpa2a|-|17 B3|17 21.33 cM|protein-coding	1135.97	1303.92	1153.18	1540.79	0.300984	0.00315585	0.0535181	Runx2
Scpep1|2410018F01Rik|4833411K15Rik|AI957256|Risc|-|11|11 C|protein-coding	249.14	188.05	254.09	173.3	-0.48691	0.00316669	0.053551	Scpep1
4933406I18Rik|4933403D24Rik|-|7|7 F1|ncRNA	8	19.09	10.24	26.89	1.29341	0.00316414	0.053551	4933406I18Rik
Kit|Bs|CD117|Fdc|Gsfsco1|Gsfsco5|Gsfsow3|SCO1|SCO5|SOW3|Ssm|Tr-kit|W|c-KIT|-|5 C3.3|5 39.55 cM|protein-coding	7392.94	8272.18	7206.65	9007.68	0.231765	0.00316601	0.053551	Kit
Chst3|C6ST|C6ST-1|GST-0|-|10|10 B4|protein-coding	0	4.77	0	4.98	5.31762	0.00316281	0.053551	Chst3
Dll1|Delta1|-|17 A2|17 8.95 cM|protein-coding	41.14	77.32	72.6	198.2	1.24699	0.0031732	0.0536233	Dll1
Lilr4b|Gp49a|gp49|-|10|10 B3|protein-coding	418.27	563.19	292.25	488.03	0.559668	0.00319143	0.0538935	Lilr4b
Amz1|5330426I05|6530401C20Rik|-|5|5 G2|protein-coding	86.85	57.27	86.56	49.8	-0.702111	0.0032035	0.0540455	Amz1
P2ry2|P2U1|P2Y2|-|7|7 F1|protein-coding	30.86	16.23	29.78	10.96	-1.15265	0.00320493	0.0540455	P2ry2
Carns1|AI790298|Atpgd1|mKIAA1394|-|19|19 A|protein-coding	910.83	1107.28	844.17	1083.63	0.311091	0.00320962	0.0540867	Carns1
Dag1|D9Wsu13e|DG|Dp427|Dp71|-|9 F2|9 59.08 cM|protein-coding	1159.97	974.6	1251.83	1008.93	-0.293427	0.00321533	0.0541071	Dag1
Ets2|AU022856|Ets-2|-|16 56.64 cM|16 C3-qter|protein-coding	684.55	852.42	671.06	854.55	0.322599	0.00321415	0.0541071	Ets2
Traf1|4732496E14Rik|-|2|2 B|protein-coding	10.29	31.5	13.96	25.9	1.2102	0.00322431	0.0542202	Traf1
Gnat2|AW490837|Gnat-2|Gt-2|Tcalpha|-|3 F2.3|3 46.83 cM|protein-coding	37.71	16.23	26.06	11.95	-1.16119	0.00323943	0.0543225	Gnat2
Egr3|Pilot|-|14|14 D2|protein-coding	5.71	16.23	0.93	10.96	2.08297	0.00323799	0.0543225	Egr3
Plin2|AA407157|ADPH|Adfp|Adrp|-|4 C4|4 40.69 cM|protein-coding	1196.54	997.51	1294.65	1055.74	-0.290605	0.00323833	0.0543225	Plin2
Gm3264|-|-|14 A1|14|protein-coding	37.71	22.91	42.81	18.92	-0.953269	0.00323696	0.0543225	Gm3264
Tmed3|1200002G13Rik|AW546672|P24b|-|9|9 E3.1|protein-coding	925.69	781.78	949.35	724.08	-0.32576	0.00324277	0.0543407	Tmed3
Cd248|2610111G01Rik|AI842296|Cd164l1|Tem1|-|19|19 A|protein-coding	33.14	54.41	43.74	94.62	0.92627	0.00324982	0.0544209	Cd248
Pter|AI790318|Mpr56-1|-|2|2 A1|protein-coding	223.99	126.96	205.69	167.33	-0.557804	0.00326254	0.0545959	Pter
Kif1b|A530096N05Rik|AI448212|AI506502|D4Mil1e|KIF1Bp130|KIF1Bp204|-|4 79.05 cM|4 E|protein-coding	176	219.55	146.12	249	0.533456	0.00326804	0.0546499	Kif1b
Smchd1|4931400A14Rik|AW554188|MommeD1|mKIAA0650|-|17|17 E1.3|protein-coding	6968.96	5906.79	7111.72	6235.86	-0.22463	0.00328168	0.0548398	Smchd1
Esm1|0610042H23Rik|AV004503|ESM-1|-|13|13 D2.2|protein-coding	2138.23	2528.62	2112.76	2534.78	0.242112	0.00329822	0.0549942	Esm1
Dgkz|E130307B02Rik|ENSMUSG00000075035|F730209L11Rik|mDGK[z]|-|2|2 E1|protein-coding	8844.33	10467.7	8993.65	10519.6	0.224166	0.00329515	0.0549942	Dgkz
Ssx2ip|AU014939|AU042321|Adip|-|3|3 H2|protein-coding	301.71	441.96	360.19	454.17	0.423147	0.00330111	0.0549942	Ssx2ip
Ska3|F630043A04Rik|-|14|14 C3|protein-coding	1002.26	796.1	979.13	820.69	-0.303622	0.00330086	0.0549942	Ska3
Srgap3|AI452337|Arhgap14|D130026O08Rik|Gbi|MEGAP|WRP|mKIAA0411|-|6|6 E3|protein-coding	77.71	45.82	93.07	58.76	-0.72541	0.00330235	0.0549942	Srgap3
C920021L13Rik|-|-|3 F2.1|3|ncRNA	184	102.14	198.25	149.4	-0.619613	0.00330627	0.0550214	C920021L13Rik
Zfp120|AI315103|E030042N05Rik|F80|MZF31|Zfp844|-|2|2 G3|protein-coding	518.84	346.5	529.59	440.22	-0.427673	0.00331559	0.0551384	Zfp120
Zfp105|AW557864|-|9 F4|9 73.23 cM|protein-coding	4.57	14.32	3.72	13.94	1.74289	0.0033192	0.0551603	Zfp105
Zcwpw1|Gm1053|-|5|5 G2|protein-coding	546.27	660.55	542.62	738.02	0.349604	0.00332832	0.0552355	Zcwpw1
Crtap|5730529N23Rik|CASP|Leprel3|P3h5|-|9|9 F3-F4|protein-coding	902.83	1063.37	911.19	1190.2	0.301267	0.00333147	0.0552355	Crtap
B4galnt4|BC038881|Gm1095|beta4GalNAcT4|-|7|7 F5|protein-coding	1643.38	2067.57	1561.77	1862.49	0.285545	0.00333292	0.0552355	B4galnt4
S100a6|2A9|5B10|CALCYCLIN|Cacy|PRA|-|3 39.35 cM|3 F1-F2|protein-coding	532.56	684.42	559.37	710.14	0.341396	0.00332957	0.0552355	S100a6
Fcho1|3322402E17Rik|N28152|-|8|8 B3.3|protein-coding	10501.4	13031.6	10499.6	12030.5	0.245666	0.00333963	0.0553086	Fcho1
Foxo3|1110048B16Rik|2010203A17Rik|C76856|FKHRL1|Fkhr2|Foxo3a|-|10 B2|10 22.79 cM|protein-coding	1783.95	2191.66	2065.29	2551.71	0.288457	0.00334439	0.0553493	Foxo3
Zfp111|-|-|7|7 A3|protein-coding	64	31.5	62.36	41.83	-0.795759	0.00335005	0.0554048	Zfp111
Hirip3|B130036O03|C86302|-|7|7 F3|protein-coding	2909.64	2457.98	3077	2651.31	-0.240079	0.00335304	0.0554162	Hirip3
Ptprn|IA-2|mIA-A|mKIAA4064|-|1 C3|1 38.64 cM|protein-coding	172.57	134.59	199.18	120.51	-0.554597	0.0033651	0.0555773	Ptprn
Slc38a4|1110012E16Rik|1700012A18Rik|Ata3|mATA3|mNAT3|-|15|15 F1|protein-coding	1.14	2.86	0.93	15.94	3.0194	0.00337842	0.0556064	Slc38a4
Ncoa4|ARA70|Rfg|-|14|14 B|protein-coding	5061.58	4167.59	5463.39	4761.8	-0.249175	0.00337414	0.0556064	Ncoa4
Gngt2|AV096488|-|11 D|11 59.01 cM|protein-coding	277.71	399.96	353.68	501.98	0.498029	0.00337746	0.0556064	Gngt2
Tnf|DIF|TNF-a|TNF-alpha|TNFSF2|TNFalpha|Tnfa|Tnfsf1a|-|17 B1|17 18.59 cM|protein-coding	353.13	469.64	289.46	424.29	0.470372	0.00337471	0.0556064	Tnf
Prtg|A230098A12Rik|Igdcc5|-|9|9 D|protein-coding	190.85	116.46	202.9	153.38	-0.559779	0.00337371	0.0556064	Prtg
Dbn1|-|-|13 B1|13 30.06 cM|protein-coding	90.28	133.64	83.77	130.47	0.594301	0.003385	0.0556431	Dbn1
Tpra1|40kDa|Gpr175|Tpra40|-|6|6 D2|protein-coding	635.41	814.24	701.77	883.44	0.331644	0.00338528	0.0556431	Tpra1
Rapsn|43kDa|Nraps|Raps|rapsyn|-|2 E1|2 50.44 cM|protein-coding	17.14	37.23	20.48	38.84	0.990948	0.00341739	0.0561325	Rapsn
Mxra7|1810057P16Rik|E130302J09Rik|-|11|11 E2|protein-coding	2.29	9.55	1.86	10.96	2.24088	0.00342684	0.0562493	Mxra7
Gys1|Gys3|MGS|-|7 B4|7 29.31 cM|protein-coding	982.83	798.01	1115.02	893.4	-0.323464	0.00347006	0.0569199	Gys1
Hmha1|6330406L22Rik|AW539505|Ha-1|-|10|10 C1|protein-coding	13894.5	16440.3	13699.4	16084.1	0.227051	0.00347368	0.0569404	Hmha1
Pros1|AW214361|-|16|16 C1.3|protein-coding	9.14	25.77	16.75	33.86	1.14954	0.003489	0.0571526	Pros1
Btg1|AI426953|AW546738|-|10|10 C3|protein-coding	1498.25	1826.06	1492.89	1783.81	0.261352	0.00349465	0.0572061	Btg1
Limd2|0610025L06Rik|AI413966|-|11|11 E1|protein-coding	4924.44	6259.02	4801.64	5516.75	0.267101	0.00350521	0.0573401	Limd2
Dgkh|5930402B05Rik|D130015C16|DGK|-|14|14 D3|protein-coding	26.29	12.41	26.99	10.96	-1.18964	0.00351122	0.0573992	Dgkh
Fancd2|2410150O07Rik|AU015151|BB137857|FA-D2|FA4|FACD|FAD|FANCD|-|6|6 E3|protein-coding	1501.67	1145.47	1293.72	1119.49	-0.31253	0.00352045	0.0575111	Fancd2
Lmbrd2|9930036E21Rik|-|15|15 A1|protein-coding	443.42	324.55	448.61	358.55	-0.396479	0.00352679	0.0575755	Lmbrd2
Atg16l2|2410118P20Rik|-|7|7 E3|protein-coding	540.56	728.33	631.04	786.83	0.357581	0.00353522	0.057674	Atg16l2
Ttbk1|AU017937|AW048023|C330008L01Rik|-|17|17 C|protein-coding	2.29	8.59	1.86	11.95	2.24099	0.00354123	0.0576938	Ttbk1
Ccr10|Cmkbr9|Gpr2|-|11 D|11 64.34 cM|protein-coding	0	7.64	0.93	4.98	3.33475	0.00354003	0.0576938	Ccr10
Btg2|AA959598|APRO1|Pc3|TIS21|-|1 E4|1 58.1 cM|protein-coding	621.7	775.1	705.49	970.09	0.380611	0.00354594	0.0577314	Btg2
Gse1|2210013I18Rik|mKIAA0182|-|8|8 E1|protein-coding	5371.28	4402.41	5591.83	4968.96	-0.238161	0.00356651	0.058027	Gse1
Tmem43|1200015A22Rik|LUMA|-|6|6 D2|protein-coding	1865.09	2340.57	2104.38	2442.15	0.257297	0.00357765	0.0581688	Tmem43
Acp1|4632432E04Rik|AI427468|Acp-1|LMW-PTP|-|12|12 A2|protein-coding	1942.8	1561.65	1851.22	1640.39	-0.255216	0.00359641	0.0584344	Acp1
Rtn3|RTN3-A1|-|19|19 A|protein-coding	7102.67	6252.34	7436.54	6279.68	-0.224704	0.00364962	0.0592188	Rtn3
Kcnh2|AI326795|ERG1|LQT|Lqt2|M-erg|Merg1|merg1a|merg1b|-|5 A3|5 10.94 cM|protein-coding	294.85	448.64	316.45	388.43	0.443766	0.00364958	0.0592188	Kcnh2
Neat1|2310043N10Rik|VINC|-|19|19 A|ncRNA	2492.5	3178.67	3289.2	5010.8	0.486983	0.00366805	0.0594778	Neat1
St8sia2|AI323367|ST8SiaII|STX|Siat8b|-|7|7 D2|protein-coding	21.71	45.82	32.58	57.77	0.896687	0.00367445	0.0595414	St8sia2
Skp2|4930500A04Rik|FBXL1|FWD1|p45|-|15|15 A2|protein-coding	1781.67	1490.06	2033.65	1676.24	-0.28144	0.0036808	0.0596042	Skp2
Fbxo17|Fbg4|Fbx17|Fbxo26|-|7|7 A3|protein-coding	283.42	467.73	288.53	355.57	0.518385	0.00368881	0.0596666	Fbxo17
Tle2|Grg2|mKIAA4188|-|10|10 C1|protein-coding	22.86	30.55	23.27	89.64	1.35383	0.00369041	0.0596666	Tle2
Ola1|2510025G09Rik|2810405J23Rik|2810409H07Rik|Gtpbp9|PTD004|-|2|2 C3|protein-coding	3486.76	2846.48	3213.81	2849.51	-0.24439	0.0036921	0.0596666	Ola1
Mettl6|1600013P15Rik|AI467521|AU020711|-|14|14 B|protein-coding	1705.1	1894.79	1504.99	2021.85	0.276839	0.00372126	0.0600974	Mettl6
Sfn|Er|Mme1|Ywhas|-|4 D3|4 66.25 cM|protein-coding	606.84	789.42	549.13	714.12	0.371613	0.00372567	0.0601284	Sfn
Hs6st3|6OST3|HS6ST-3|-|14|14 E4|protein-coding	6.86	15.27	5.58	21.91	1.55883	0.00372975	0.0601538	Hs6st3
Ano8|BC053460|Tmem16h|-|8|8 B3.3|protein-coding	489.13	708.28	647.79	841.61	0.432117	0.00373953	0.0602712	Ano8
Prorsd1|2010316F05Rik|Ncrna00117|Prdxdd1|-|11|11 A4|protein-coding	338.28	222.41	361.12	285.85	-0.474726	0.00375675	0.0605081	Prorsd1
Phldb1|AU041016|D330037A14Rik|Ll5a|-|9|9 A5.2|protein-coding	625.13	539.32	730.62	513.93	-0.375453	0.00377727	0.0607572	Phldb1
Soga1|9830001H06Rik|AI426038|D430036N24Rik|Soga|-|2|2 H1|protein-coding	120	67.77	128.44	92.63	-0.646439	0.00377614	0.0607572	Soga1
Igsf10|6530405F15Rik|9030224D03|AA409708|AA536958|AI414626|Adlican2|CMF608|-|3|3 D|protein-coding	225.14	293.05	247.57	382.46	0.499499	0.00378335	0.0607737	Igsf10
Akr1c12|AI266976|Akra|-|13|13 A1|protein-coding	6740.39	5903.93	6615.64	5446.04	-0.244153	0.00378211	0.0607737	Akr1c12
Hist1h3a|-|-|13|13 A2-A3|protein-coding	171.42	127.91	170.32	102.59	-0.574596	0.00378848	0.0608154	Hist1h3a
Hist1h2ah|-|-|13|13 A2-A3|protein-coding	2195.37	2039.89	2631.18	1932.21	-0.291207	0.0038033	0.0610126	Hist1h2ah
Fstl1|AI316791|AW107808|Fstl|TSC-36|-|16 B3|16 26.48 cM|protein-coding	104	134.59	132.16	416.32	1.19728	0.0038097	0.0610745	Fstl1
Tbxa2r|TP|TXA2-R|-|10 C1|10 39.72 cM|protein-coding	485.7	756.01	649.65	772.88	0.415971	0.00381981	0.0610821	Tbxa2r
Mtss1l|ABBA|-|8|8 E1|protein-coding	128	145.09	97.73	252.98	0.804688	0.00382033	0.0610821	Mtss1l
Amd1|AdoMetDC|Amd-1|SAMDC|SAMDC 1|adoMetDC1|-|10 21.85 cM|10 B2|protein-coding	4635.3	3711.31	5186.03	4474.96	-0.27531	0.0038143	0.0610821	Amd1
Kdm7a|A630082K20Rik|BB041802|ENSMUSG00000073143|Jhdm1d|mKIAA1718|-|6|6 B1|protein-coding	359.99	526.91	470.95	622.49	0.452528	0.0038179	0.0610821	Kdm7a
Ppip5k2|AW555814|D330021B20|Hisppd1|Vip2|mKIAA0433|-|1|1 D|protein-coding	3821.61	3272.22	3881.15	3363.44	-0.225812	0.00383001	0.0611962	Ppip5k2
Agl|1110061O17Rik|9430004C13Rik|9630046L06Rik|AI850929|C77197|-|3|3 G1|protein-coding	837.69	660.55	779.95	624.48	-0.340696	0.0038369	0.0612656	Agl
Pcx|Pc|Pcb|-|19 A|19 4.07 cM|protein-coding	205.71	137.46	190.8	142.43	-0.510728	0.00384964	0.0614282	Pcx
Amd2|AdoMetDC|Amd1|Amd3|ENSMUSG00000063953|-|10|10 B1|protein-coding	4625.02	3704.63	5169.28	4464	-0.27444	0.00385321	0.0614444	Amd2
Naa25|4833422K13Rik|A630046C11|AI450868|C330023M02Rik|Mdm20|-|5|5 F|protein-coding	2093.66	1726.79	2118.34	1856.51	-0.24444	0.00387498	0.0617507	Naa25
Sptan1|2610027H02Rik|Spna-2|Spna2|-|2 B|2 20.93 cM|protein-coding	9962.02	8460.23	9619.1	8402.12	-0.225965	0.00388912	0.061853	Sptan1
Hist1h2ad|-|-|13|13 A2-A3|protein-coding	2219.37	2067.57	2669.34	1951.13	-0.29277	0.00388894	0.061853	Hist1h2ad
Sdc2|4833414L08Rik|AA960457|Hspg1|Synd2|syndecan-2|-|15 B3.1|15 13.74 cM|protein-coding	16	21	15.82	79.68	1.62947	0.00388587	0.061853	Sdc2
Parvg|AI413459|-|15|15 E2|protein-coding	15957.3	14358.4	16352.9	13053.4	-0.246329	0.00389261	0.0618676	Parvg
Bub1|AL022991|Bub1a|C80208|D2Xrf87|-|2 F1|2 62.1 cM|protein-coding	2657.07	2133.43	2515.77	2271.84	-0.242487	0.00390656	0.0620483	Bub1
H2-Oa|H-2Oa|-|17 B1|17 17.98 cM|protein-coding	271.99	371.32	243.85	337.64	0.452068	0.00392089	0.0621938	H2-Oa
Tnik|1500031A17Rik|4831440I19Rik|AI451411|C530008O15Rik|C630040K21Rik|-|3|3 A3|protein-coding	1469.67	1816.52	1546.87	1811.69	0.255662	0.00392071	0.0621938	Tnik
Tmem64|9630015D15Rik|AI790744|AV300874|-|4|4 A2|protein-coding	1124.54	1338.29	1240.66	1622.46	0.310545	0.00393355	0.0623533	Tmem64
Ybx1|1700102N10Rik|C79409|EF1A|MSY1|Nsep1|YB-1|dbpB|mYB-1a|-|4|4 D1|protein-coding	35284.8	30825.5	34920.1	29613.6	-0.22601	0.00393896	0.062398	Ybx1
Mcc|D18Ertd451e|E330037C19|-|18 B3|18 23.74 cM|protein-coding	10.29	19.09	8.38	27.89	1.31783	0.00394701	0.0624844	Mcc
Dok3|AI450713|Dokl|-|13|13 B1|protein-coding	259.42	185.18	386.25	238.04	-0.625453	0.00396062	0.0626174	Dok3
Phka1|5330411D17|9830108K24Rik|Phka|-|X D|X 45.47 cM|protein-coding	20.57	26.73	13.03	50.8	1.20234	0.00396028	0.0626174	Phka1
Cyp39a1|mCYP39A1|-|17|17 B3|protein-coding	5.71	19.09	14.89	37.85	1.39485	0.00396677	0.0626734	Cyp39a1
Dip2c|2900024P20Rik|9630044M06|mKIAA0934|-|13|13 A1|protein-coding	211.42	284.46	184.28	269.91	0.480256	0.00397521	0.0627655	Dip2c
Slc28a2|2010208B10Rik|B430217P18|BB152493|Cnt2|-|2|2 E3|protein-coding	1035.4	883.92	1145.73	901.37	-0.30038	0.00398468	0.0628325	Slc28a2
Olfm3|B230206G02Rik|-|3|3 F3|protein-coding	0	3.82	0.93	8.96	3.33634	0.00398238	0.0628325	Olfm3
F630028O10Rik|ENSMUSG00000065522|Gm14924|OTTMUSG00000018496|mir-223|-|X C3|X|ncRNA	11.43	0	6.52	2.99	-2.49923	0.00398792	0.0628423	F630028O10Rik
Tmem97|1810014L12Rik|AI115531|AL022956|D11Bhm182e|-|11 B5|11 46.74 cM|protein-coding	2205.65	1869.02	2141.61	1813.69	-0.249012	0.00399703	0.0629276	Tmem97
Runx3|AML2|Cbfa3|Pebp2a3|-|4 D3|4 67.19 cM|protein-coding	7495.8	8853.5	6679.86	8258.7	0.261963	0.00399856	0.0629276	Runx3
Scarf2|AI194363|NSR1|SREC-II|SRECRP-1|Scarf1|Scatf1|Srec2|SrecII|W53987|W65560|-|16|16 A3|protein-coding	11.43	20.05	17.68	71.71	1.61173	0.00401581	0.0631577	Scarf2
Cyp11a1|Cyp11a|Cypxia1|D9Ertd411e|P450scc|Scc|cscc|-|9 B|9 31.63 cM|protein-coding	104	38.18	58.64	47.81	-0.920054	0.00403675	0.0634456	Cyp11a1
Slc26a7|-|-|4|4 A1|protein-coding	4.57	7.64	2.79	20.92	1.92591	0.00406981	0.0639234	Slc26a7
Creb3|AU044960|AW538053|C80076|LZIP|LZIP-1|LZIP-2|Luman|-|4 B1|4 23.05 cM|protein-coding	394.28	527.87	439.31	559.74	0.37077	0.00407272	0.0639274	Creb3
1700037H04Rik|-|-|2|2 F3|protein-coding	1015.97	1237.1	950.28	1192.19	0.296124	0.00408223	0.0640348	1700037H04Rik
Ccnjl|Gm877|-|11|11 B1.1|protein-coding	330.28	427.64	320.17	431.26	0.391466	0.00409209	0.0641477	Ccnjl
Asah1|2310081N20Rik|AC|Asah|-|8|8 A4|protein-coding	989.69	816.14	1114.08	894.39	-0.311022	0.00410255	0.064253	Asah1
Rps12|-|-|10|10 A3|protein-coding	25769.6	22410.1	29188.7	24431.5	-0.241567	0.00410416	0.064253	Rps12
Prrg4|9930111I18Rik|TMG4|-|2|2 E2|protein-coding	580.56	729.28	539.82	704.16	0.3469	0.00412211	0.0644921	Prrg4
Ccdc125|5830436D01Rik|AL023012|-|13|13 D1|protein-coding	711.98	849.55	661.75	877.46	0.320675	0.00412541	0.0644972	Ccdc125
Gsn|ADF|-|2 B|2 23.5 cM|protein-coding	150.85	214.77	188.01	306.76	0.603315	0.0041278	0.0644972	Gsn
Tmc6|D11Ertd204e|EVER1|-|11 E2|11 82.96 cM|protein-coding	1603.39	1906.25	1532.91	1866.47	0.256977	0.00414686	0.064753	Tmc6
Fam212a|6230427J02Rik|Inka1|-|9|9 F2|protein-coding	516.56	406.64	584.5	447.2	-0.379853	0.00416431	0.0649832	Fam212a
St3gal2|AI429591|AW822065|ST3GalII|Siat5|-|8|8 E1|protein-coding	1443.39	1150.24	1639.02	1365.49	-0.306179	0.00417592	0.0651222	St3gal2
Abcc4|D630049P08Rik|MOATB|MRP4|-|14|14 E4|protein-coding	1422.82	1101.56	1188.54	943.2	-0.360435	0.00419689	0.0654067	Abcc4
Suclg1|1500000I01Rik|Sucla1|-|6|6 C3|protein-coding	4062.75	3461.22	3986.32	3470.01	-0.225984	0.00420121	0.0654272	Suclg1
Apcdd1|AB023957|AU041258|Drapc1|EIG180|-|18|18 E1|protein-coding	417.13	615.69	331.34	469.11	0.530423	0.00420636	0.0654272	Apcdd1
Gbp9|-|-|5|5 E5|protein-coding	1445.68	1723.93	1263	1626.44	0.298169	0.00420518	0.0654272	Gbp9
Pou6f1|2310038G18Rik|C79593|Emb|cns-1|-|15 F1|15 56.35 cM|protein-coding	18.29	32.45	18.61	41.83	0.990459	0.00422844	0.065728	Pou6f1
Sfxn1|2810002O05Rik|A930015P12Rik|f|-|13 B1|13 28.4 cM|protein-coding	4221.6	3637.81	4084.98	3460.05	-0.236489	0.00427716	0.0663683	Sfxn1
Wisp1|AW146261|CCN4|Elm1|-|15 D2|15 29.3 cM|protein-coding	3.43	11.45	6.52	20.92	1.62315	0.00427791	0.0663683	Wisp1
Trib1|A530090O15Rik|TRB-1|Trb1|-|15|15 D1|protein-coding	131.43	179.46	115.41	179.28	0.533222	0.0042731	0.0663683	Trib1
Acot11|1110020M10Rik|2010309H15Rik|AW060409|BFIT|BFIT1|Thea|Them1|mKIAA0707|-|4|4 C7|protein-coding	339.42	433.37	349.95	476.08	0.38764	0.00428699	0.0664664	Acot11
Acadl|AA960361|AU018452|C79855|LCAD|-|1 C3|1 33.64 cM|protein-coding	2901.64	3375.31	2867.58	3423.2	0.226447	0.00430379	0.0666838	Acadl
Eml3|BC022146|-|19|19 A|protein-coding	1895.95	2416.93	2183.49	2500.92	0.258138	0.00430864	0.066716	Eml3
Ncl|B530004O11Rik|C23|D0Nds28|D1Nds28|Nucl|-|1 D|1 43.94 cM|protein-coding	58612.1	47196.1	52025.1	46906.9	-0.24427	0.00431238	0.0667309	Ncl
Hist1h2bk|-|-|13|13 A2-A3|protein-coding	220.57	149.87	187.08	129.48	-0.549721	0.00431738	0.0667653	Hist1h2bk
Pianp|AI255183|AU067746|C530028O21Rik|Panp|-|6|6 F2|protein-coding	1.14	3.82	0.93	11.95	2.77467	0.00432162	0.0667879	Pianp
Chst11|1110020P09Rik|C4ST|C4ST-1|C4ST1|C4s|-|10|10 C1|protein-coding	1633.1	1952.07	1578.52	1901.33	0.253231	0.00432617	0.0668153	Chst11
Ifih1|9130009C22Rik|Helicard|Hlcd|MDA5|RLR-2|-|2|2 C3|protein-coding	862.83	573.69	653.37	558.75	-0.42926	0.0043489	0.0670924	Ifih1
C77080|Kiaa1522|mKIAA1522|-|4|4 D2.2|protein-coding	202.28	120.27	161.95	127.49	-0.56152	0.00434969	0.0670924	C77080
Dpysl3|CRMP-4|DRP-3|TUC4|ULIP-1|Ulip|Ulip1|-|18|18 B3|protein-coding	13.71	21.95	18.61	76.69	1.5698	0.00437114	0.06738	Dpysl3
Armcx4|AI448196|Gm195|-|X|X E3|protein-coding	1500.53	1680.97	1320.71	1770.86	0.281148	0.0043857	0.0675611	Armcx4
0610010F05Rik|Kiaa1841|mKIAA1841|-|11|11 A3.3|protein-coding	1907.38	1566.43	1864.25	1637.4	-0.245986	0.00439571	0.067672	0610010F05Rik
Lpar2|Edg4|IPA2|LPA2|-|8 B3.3|8 33.91 cM|protein-coding	1086.83	1319.2	1087.09	1320.67	0.269948	0.00441857	0.0679481	Lpar2
Ercc6l|BC004701|D330021P09Rik|-|X|X D|protein-coding	1709.67	1400.33	1771.18	1534.81	-0.257659	0.0044193	0.0679481	Ercc6l
Zfp658|-|-|7|7 B4|protein-coding	290.28	366.55	268.98	382.46	0.412508	0.00442493	0.0679871	Zfp658
Zxda|4933406P09Rik|AW413531|-|X|X C3|pseudo	684.55	879.15	762.27	936.22	0.314839	0.00442749	0.0679871	Zxda
Fam65b|-|-|13|13 A3.2|protein-coding	2641.07	3171.03	2690.74	3126.39	0.229936	0.00443646	0.0680813	Fam65b
Vmn2r47|-|-|7|7 A1|protein-coding	0	1.91	0	7.97	5.31877	0.0044626	0.0684389	Vmn2r47
Fut7|AI853193|FTVII|Fuc-TVII|FucT-VII|-|2|2 A3|protein-coding	783.98	1097.74	920.49	1049.77	0.321929	0.0044742	0.0685293	Fut7
Zfp609|9830165N24|BC016271|Znf609|mKIAA0295|-|9|9 C|protein-coding	1078.83	895.37	1013.57	766.91	-0.339764	0.00447398	0.0685293	Zfp609
BC049352|-|-|-|protein-coding	25.14	8.59	21.41	10.96	-1.24643	0.00447981	0.0685715	BC049352
Reln|reeler|rl|-|5 9.98 cM|5 A3-B1|protein-coding	26.29	19.09	41.88	12.95	-1.10494	0.00448822	0.0686566	Reln
Lcor|3110023F06Rik|A630025C20Rik|Mlr2|mKIAA1795|-|19|19 C3|protein-coding	206.85	142.23	186.15	134.46	-0.512607	0.00450772	0.0689111	Lcor
Rpph1|Gm24821|H1RNA|Rmrp5|Rpr|-|14|14 C1|ncRNA	68.57	42	64.22	36.85	-0.755521	0.00451514	0.0689368	Rpph1
Alms1|bbb|-|6|6 C3|protein-coding	1306.25	1116.83	1305.82	1046.78	-0.281105	0.00451292	0.0689368	Alms1
Nfkb2|NF-kappaB2|lyt|p49|p49/p100|p50B|p52|-|19 38.8 cM|19 C3-D2|protein-coding	844.55	1012.78	812.53	1031.84	0.293324	0.00455326	0.0694748	Nfkb2
Aven|1700013A01Rik|1700056A21Rik|mAven-L|mAven-S|-|2|2 E4|protein-coding	866.26	1031.87	834.87	1061.72	0.289469	0.0045749	0.0697608	Aven
Klhdc10|2410127E18Rik|AI593221|mKIAA0265|-|6|6 A3|protein-coding	2300.51	1878.57	2272.85	2027.82	-0.238541	0.00459826	0.0700632	Klhdc10
Fbxl17|6330576B01Rik|AI452053|BB073797|C130023C01Rik|Fbx13|Fbxo13|-|17|17 E1.2|protein-coding	666.27	831.42	671.06	838.62	0.310121	0.00460057	0.0700632	Fbxl17
Peak1|1110049L02Rik|9530046P14|AA690169|BE132841|C230081A13Rik|SGK269|mKIAA2002|-|9|9 B|protein-coding	1139.4	1343.06	1144.8	1422.27	0.264771	0.00461753	0.070277	Peak1
Trim6|C430046K18Rik|D7Ertd684e|-|7 F1|7 55.55 cM|protein-coding	44.57	24.82	40.95	20.92	-0.902921	0.00463277	0.0704643	Trim6
Acsl1|Acas|Acas1|Acs|FACS|Facl2|LACS 1|LACS1|-|8|8 B2|protein-coding	915.4	755.05	861.86	635.44	-0.361583	0.00463828	0.0705036	Acsl1
1110059E24Rik|-|-|19|19 C1|protein-coding	1145.11	917.33	1118.74	959.13	-0.28123	0.00465351	0.0706459	1110059E24Rik
Chka|CK|CK/EK-alpha|Chetk-alpha|Chk|ChoK|EK|EtnK-alpha|-|19 A|19 3.57 cM|protein-coding	900.55	1106.33	1012.64	1287.81	0.310185	0.00465058	0.0706459	Chka
H2-M10.3|5.3H|-|17 B1|17 19.01 cM|protein-coding	0	12.41	0.93	1.99	3.54168	0.00466648	0.0707979	H2-M10.3
Ptbp3|5830471K22Rik|AA407443|AI462022|AW107884|C86549|Rod1|-|4|4 B3|protein-coding	13854.5	11897.6	14416.1	12622.1	-0.216359	0.00471446	0.0714808	Ptbp3
Fat4|6030410K14Rik|9430004M15|-|3|3 B|protein-coding	16	20.05	13.96	65.73	1.49036	0.00472821	0.0716442	Fat4
Tacstd2|C80403|EGP-1|GA733-1|Ly97|TROP2|-|6|6 C1|protein-coding	84.57	116.46	79.11	132.47	0.595044	0.00473892	0.0717612	Tacstd2
Ift80|4921524P20Rik|Wdr56|mKIAA1374|-|3|3 E2|protein-coding	2477.65	3014.49	2851.76	3429.17	0.261561	0.00474296	0.0717771	Ift80
Pxdc1|1300014I06Rik|-|13|13 A4|protein-coding	0	2.86	1.86	14.94	2.95996	0.0047634	0.0720412	Pxdc1
Dusp4|2700078F24Rik|AI844617|BB104621|E130306H24Rik|MKP2|-|8|8 A4|protein-coding	243.42	359.87	162.88	279.87	0.652036	0.00477002	0.072096	Dusp4
Lrrc14b|AI595366|-|13|13 C1|protein-coding	118.85	159.41	110.76	174.3	0.530238	0.00479488	0.0724201	Lrrc14b
Plcxd1|A330045H12Rik|Gm576|-|5|5 F|protein-coding	490.27	608.05	478.4	626.47	0.339792	0.00479749	0.0724201	Plcxd1
Actr3b|9630005C02|ARP11|AW047569|Arp3b|Arp3beta|-|5|5 A3|protein-coding	195.42	120.27	191.73	151.39	-0.523365	0.00480639	0.072509	Actr3b
Calr|CRT|Calregulin|-|8 C3|8 41.21 cM|protein-coding	26224.4	22368.1	25142.8	22063	-0.219607	0.00481199	0.0725479	Calr
Rhbdf1|C16ORF8|Dist|Dist1|Egfr-rs|mKIAA4242|-|11 A4|11 18.83 cM|protein-coding	9.14	19.09	11.17	30.88	1.26061	0.00482969	0.0727236	Rhbdf1
Ralgds|Gnds|Rgds|mKIAA1308|-|2|2 A3|protein-coding	860.55	1099.65	856.27	1026.86	0.299469	0.00482942	0.0727236	Ralgds
Uso1|115kDa|TAP|Vdp|-|5|5 E3|protein-coding	3924.47	3329.49	3795.52	3321.61	-0.225174	0.00484858	0.0729167	Uso1
Enpp1|4833416E15Rik|AI428932|C76301|CD203c|E-NPP 1|E-NPP1|Ly-41|M6S1|NPP1|Npps|PC-1|Pca|Pca-1|Pdnp1|ttw|twy|-|10 A4|10 12.26 cM|protein-coding	28.57	57.27	35.37	54.78	0.787326	0.00484792	0.0729167	Enpp1
Nob1|1700021I09Rik|ART-4|Nob1p|Psmd8bp1|-|8|8 D2|protein-coding	2417.08	2908.53	2391.98	2792.74	0.235824	0.0048657	0.0731284	Nob1
Sec16b|Lztr2|Rgpr|Rgpr-p117|-|1|1 H1|protein-coding	0	5.73	1.86	8.96	2.68902	0.00487031	0.0731428	Sec16b
Itga9|(alpha)9|2610002H11Rik|6720458D17Rik|AI461869|D130073C02|D9Ertd428e|-|9 F3|9 70.32 cM|protein-coding	669.7	571.78	760.41	562.73	-0.345468	0.00487274	0.0731428	Itga9
Spata13|C79050|ESTM11|X83327|mFLJ00298|-|14 D1|14 31.77 cM|protein-coding	4134.75	4958.92	4291.6	4931.12	0.220741	0.00487823	0.0731795	Spata13
Dusp7|AU015694|Mkpx|Pyst2|-|9|9 F1|protein-coding	740.55	942.15	813.46	988.02	0.300583	0.00490447	0.0735273	Dusp7
Rltpr|CG1399-PB|D130029J02Rik|Gm585|-|8|8 D3|protein-coding	4593.02	5817.06	4580.13	5174.14	0.251966	0.00493649	0.0739612	Rltpr
Ctnnd1|AA409437|AU019353|Catns|Ctnnd|P120|mKIAA0384|-|2 D|2 49.45 cM|protein-coding	41.14	69.68	57.71	102.59	0.773338	0.00496041	0.0742733	Ctnnd1
Hist1h3i|H3-H|-|13|13 A2-A3|protein-coding	185.14	142.23	185.22	109.56	-0.562845	0.00496498	0.0742956	Hist1h3i
Ypel3|0610043B10Rik|1190001G19Rik|Suap|-|7|7 F3|protein-coding	476.56	659.6	565.88	688.22	0.357323	0.0049766	0.0744231	Ypel3
Ctgf|Ccn2|Fisp12|Hcs24|fisp-12|-|10 11.84 cM|10 A3-B1|protein-coding	5.71	15.27	6.52	18.92	1.44416	0.00499865	0.0747064	Ctgf
Tnfsf10|A330042I21Rik|AI448571|APO-2L|Ly81|TL2|Trail|-|3|3 A3|protein-coding	2566.79	3013.53	2804.29	3395.31	0.24271	0.00500682	0.074782	Tnfsf10
Slc25a27|3632410G24Rik|9430092A03Rik|D530043E16Rik|Ucp4|-|17|17 C|protein-coding	141.71	209.05	170.32	238.04	0.501834	0.00501079	0.0747949	Slc25a27
Acap1|Centb1|-|11|11 B3|protein-coding	9366.61	10856.2	9467.4	11130.1	0.212621	0.00501466	0.0748061	Acap1
Zbtb4|2310026P19Rik|9230111I22Rik|mKIAA1538|-|11|11 B4|protein-coding	98.28	165.14	132.16	180.27	0.563824	0.00502501	0.0749141	Zbtb4
Bin2|-|-|15|15 F1|protein-coding	3422.77	3054.58	3652.19	3030.78	-0.227767	0.00504421	0.0751537	Bin2
Nin|3110068G20Rik|AI385615|AU024711|mKIAA1565|-|12|12 C3|protein-coding	4646.73	3840.18	4044.96	3232.96	-0.305623	0.00507213	0.0755229	Nin
Dcaf15|6720484B16|-|8|8 C3|protein-coding	2925.64	3679.81	2772.65	3222.01	0.267898	0.00509027	0.0757461	Dcaf15
Ebf1|Ebf|O/E-1|OE-1|Olf-1|Olf1|-|11 B1.1|11 26.45 cM|protein-coding	8	12.41	8.38	43.82	1.73816	0.00510004	0.0758446	Ebf1
Gdi1|GDIA|GDIalpha|-|X 37.97 cM|X B-C1|protein-coding	1967.95	2177.34	2043.89	2780.79	0.292072	0.00512	0.0760004	Gdi1
Anp32e|2810018A15Rik|AI047746|AI326868|CPD1|LANP-L|LANPL|mLANP-L|-|3|3 F2.1|protein-coding	20692	18144.2	21273.7	18356	-0.21174	0.00511934	0.0760004	Anp32e
Anxa9|1110003P15Rik|2310069F17Rik|-|3|3 F2|protein-coding	110.85	68.73	92.14	59.76	-0.661274	0.00511969	0.0760004	Anxa9
Cltc|3110065L21Rik|CHC|R74732|-|11|11 C|protein-coding	13470.5	11471.9	13048.9	11515.6	-0.216667	0.00514079	0.0762619	Cltc
Chst14|2600016L03Rik|D4ST-1|D4st1|-|2|2 E5|protein-coding	165.71	236.73	190.8	262.94	0.471542	0.00515356	0.0763572	Chst14
Masp2|MASP-2|MAp19|-|4|4 E1|protein-coding	1069.69	1157.88	1031.25	1533.82	0.34393	0.0051535	0.0763572	Masp2
Iqgap3|AI593484|D030034H08|-|3 F1|3 38.78 cM|protein-coding	1193.11	976.51	1181.1	1002.96	-0.272725	0.00516018	0.0764082	Iqgap3
Bpifc|4732454E24|Bpil2|-|10|10 C1|protein-coding	1833.09	1620.84	1888.45	1515.89	-0.256225	0.0051741	0.0765672	Bpifc
Ccdc80|2610001E17Rik|DRO1|Ssg1|Urb|-|16|16 B5|protein-coding	24	45.82	41.88	101.59	1.12635	0.00517948	0.0765996	Ccdc80
Bfsp2|AI448593|CP49|-|9|9 F1|protein-coding	249.14	338.87	280.15	374.49	0.41636	0.00523358	0.0773521	Bfsp2
Tmed5|3110020O18Rik|4432412D15Rik|-|5|5 E5|protein-coding	3309.63	2743.39	3348.77	2999.9	-0.224732	0.00526805	0.0777661	Tmed5
Gga2|1200007E24Rik|mKIAA1080|-|7|7 F3|protein-coding	1932.52	1665.7	1980.6	1673.25	-0.239384	0.0052656	0.0777661	Gga2
Haus8|2410004L22Rik|Hice1|-|8|8 C1|protein-coding	1047.97	901.1	1074.99	841.61	-0.294299	0.00528434	0.0779586	Haus8
S1pr4|Edg6|Lpc1|S1p4|-|10|10 C1|protein-coding	589.7	805.64	685.02	813.72	0.332847	0.00530099	0.0780605	S1pr4
Sall2|AI225809|AW559097|Msal-2|Sal-2|mKIAA0360|p150(Sal2)|-|14|14 B-C1|protein-coding	260.56	418.1	370.43	484.05	0.499437	0.00529927	0.0780605	Sall2
Ptgir|IP|PGI2|-|7 A2|7 9.15 cM|protein-coding	1137.11	917.33	1309.54	1070.68	-0.312635	0.00529549	0.0780605	Ptgir
4930509E16Rik|-|-|9|9 D|ncRNA	20.57	11.45	23.27	6.97	-1.2477	0.00531827	0.0782671	4930509E16Rik
1700017B05Rik|AA682102|D9Ertd278e|-|9 30.89 cM|9 C|protein-coding	3613.62	4464.46	3381.35	3965.01	0.260352	0.00536559	0.0789152	1700017B05Rik
Smpdl3a|0610010C24Rik|AI529588|ASM3A|ASML3|ASML3A|-|10|10 B4|protein-coding	16	33.41	13.03	27.89	1.07656	0.00537495	0.0790045	Smpdl3a
Ankrd23|1110058D09Rik|2310041C05Rik|AI853437|Darp|MARP3|-|1|1 B|protein-coding	226.28	284.46	228.96	338.63	0.440026	0.00539174	0.0792029	Ankrd23
S100a16|2300002L21Rik|AI325039|AI663996|DT1P1A7|S100F|-|3|3 F1-F2|protein-coding	0	4.77	1.86	9.96	2.69019	0.00539649	0.0792243	S100a16
Dusp15|AI851682|LMW-DSP10|T-DSP10|-|2|2 H1|protein-coding	18.29	32.45	17.68	38.84	0.971955	0.00541195	0.0794027	Dusp15
Sertad2|AB041541|AU021878|Kiaa0127|MNCb-1504|SEI-2|Sei2|TRIP-Br2|mKIAA0127|-|11|11 A3.2|protein-coding	794.26	656.73	865.58	691.21	-0.312127	0.00542092	0.0794374	Sertad2
Gm16617|-|-|14 C2|14 26.75 cM|ncRNA	12.57	2.86	10.24	2.99	-1.91692	0.00541988	0.0794374	Gm16617
Mapkapk3|3PK|AI874665|MAPKAP-K3|MAPKAP3|MK-3|MK3|MapkKapk3|-|9|9 F1|protein-coding	1362.25	1611.29	1333.74	1623.45	0.25275	0.0054317	0.079547	Mapkapk3
Chaf1a|AL023013|AL024058|CAF-1|Cac1p|-|17|17 D|protein-coding	5520.99	4816.69	5334.95	4463	-0.235711	0.00545033	0.0797226	Chaf1a
Slc14a2|UT-A1|UT-A3|-|18|18 E3|protein-coding	10.29	1.91	11.17	2.99	-2.09632	0.00544827	0.0797226	Slc14a2
Chd3|2600010P09Rik|AF020312|Chd7|Prp7|Prp9-1|-|11|11 B3|protein-coding	10095.7	12217.4	10647.6	12068.3	0.217337	0.00546044	0.079822	Chd3
1700066B19Rik|-|-|18|18 B2|protein-coding	164.57	130.77	196.38	119.52	-0.540593	0.00546471	0.079836	1700066B19Rik
Rasip1|1110025D03Rik|2610025P08Rik|AI853551|Rain|-|7|7 B2|protein-coding	9.14	0.95	10.24	2.99	-2.25741	0.00548944	0.0800998	Rasip1
Nup210l|4930548O11Rik|R26-EGFP|Tg(Gt(ROSA)26Sor-EGFP)130910Eps|-|3|3 F2|protein-coding	163.42	197.59	143.33	246.01	0.522293	0.00548776	0.0800998	Nup210l
Atad5|C130052G03Rik|FRAG1|Gm17|-|11|11 B5|protein-coding	3959.89	3168.17	3693.14	3409.25	-0.229553	0.00550629	0.080297	Atad5
Prkar1a|1300018C22Rik|RIalpha|Tse-1|Tse1|-|11 E1|11 72.33 cM|protein-coding	15791.6	18377.1	16023.5	18674.7	0.209308	0.00552136	0.0804679	Prkar1a
Oas1g|AI449562|L2|Mmu-L|Mmu-L2|Oas1b|Oias-1|Oias1|-|5 F|5 60.65 cM|protein-coding	123.43	40.09	47.47	35.86	-1.1688	0.00555	0.0808363	Oas1g
Marcks|Macs|PKCSL|-|10 B1|10 19.49 cM|protein-coding	11235.1	13495.5	12373.1	14266.5	0.222965	0.00555603	0.0808753	Marcks
Prelp|7330409J17Rik|SLRR2A|-|1 E4|1 58.02 cM|protein-coding	34.28	69.68	73.53	212.14	1.35522	0.00556362	0.0809367	Prelp
Ppp2r3c|4930511A21Rik|5730412A08Rik|G4-1|G5pr|-|12|12 C1|protein-coding	1159.97	887.74	1211.81	1057.73	-0.29863	0.00556784	0.0809491	Ppp2r3c
Bco2|B-diox-II|Bcdo2|Bcmo2|CMO2|-|9|9 B|protein-coding	30.86	16.23	37.23	17.93	-1.00973	0.00558172	0.0811018	Bco2
Fbxo27|E130008B10Rik|FBG5|Gm161|-|7|7 A3|protein-coding	8	13.36	1.86	17.93	1.70716	0.00559131	0.0811921	Fbxo27
Adcy6|AC6|mKIAA0422|-|15|15 F|protein-coding	788.55	1047.15	994.02	1256.93	0.356041	0.00559955	0.0812627	Adcy6
Glrx|C86710|D13Wsu156e|Glrx1|Grx1|TTase|-|13 C1|13 40.95 cM|protein-coding	718.84	882.01	729.69	908.34	0.294853	0.00562476	0.0815794	Glrx
Gab3|5930433H21Rik|-|X|X A7.3|protein-coding	100.57	147	107.03	154.38	0.52441	0.00569198	0.0825046	Gab3
Maz|PUR1|Pur-1|SAF-1|SAF-2|-|7|7 F4|protein-coding	10702.6	12834	11508.5	13149	0.215755	0.00571636	0.0828081	Maz
Rsph9|1700027N10Rik|-|17|17 C|protein-coding	1.14	10.5	1.86	5.98	2.33033	0.00572751	0.0829195	Rsph9
Aspn|4631401G09Rik|AA986886|Plap1|Slrr1c|-|13|13 B1|protein-coding	8	15.27	13.03	46.81	1.50923	0.00573394	0.0829627	Aspn
P4ha1|AL022634|P4ha|-|10|10 B4|protein-coding	764.55	611.87	912.12	712.13	-0.354262	0.00577607	0.0834218	P4ha1
D630003M21Rik|-|-|2|2 H1|protein-coding	5.71	0.95	6.52	0	-3.36503	0.00577433	0.0834218	D630003M21Rik
Ryr1|AI528790|RYR-1|Ryr|skrr|-|7 16.94 cM|7 A2-B3|protein-coding	42.28	24.82	55.84	29.88	-0.863541	0.00576961	0.0834218	Ryr1
Ipo11|1700081H05Rik|2510001A17Rik|AI314624|AW555235|E330021B14Rik|Ranbp11|-|13|13 D2.1|protein-coding	2803.35	2301.43	2656.31	2389.37	-0.229445	0.00578897	0.0835578	Ipo11
Pacs2|6720425G15Rik|AW208651|AW489976|E230011J22|Pacs1l|mKIAA0602|-|12|12 F1|protein-coding	1993.09	1673.34	1974.08	1723.05	-0.234622	0.00579752	0.083631	Pacs2
H2-M10.5|6.9H|-|17 B1|17 19.16 cM|protein-coding	0	11.45	0.93	1.99	3.44323	0.00581582	0.0838447	H2-M10.5
H2-M10.6|-|-|17|17 B1|protein-coding	0	11.45	0.93	1.99	3.44323	0.00582166	0.0838786	H2-M10.6
H2-M10.4|15H|-|17 B1|17 19.09 cM|protein-coding	0	11.45	0.93	1.99	3.44324	0.00582578	0.0838877	H2-M10.4
Aip|AA408703|AW476050|Ara9|D19Bwg1412e|Fkbp16|Xap2|-|19 A|19 3.82 cM|protein-coding	2694.78	3335.22	2748.45	3113.45	0.235018	0.00583828	0.0840174	Aip
Tbc1d1|1110062G02Rik|AI385682|AW555803|Nob1|Nobq1|Tbc1|mKIAA1108|-|5 C3.1|5 32.8 cM|protein-coding	1894.81	1585.52	1816.79	1568.67	-0.244535	0.00585348	0.0841805	Tbc1d1
H2-Q7|H-2Q7|Ped|Q9|Qa-2|Qa-7|Qa7|-|17 B1|17 18.67 cM|protein-coding	5572.42	7495.17	3625.2	5571.53	0.498497	0.00585661	0.0841805	H2-Q7
S1pr2|1100001A16Rik|Edg5|Gpcr13|H218|LPb2|S1P2|-|9 A3|9 7.68 cM|protein-coding	402.27	318.82	491.43	355.57	-0.420184	0.00586975	0.0842686	S1pr2
H2-Q9|H-2Q9|Ped|Qa-2|Qa-9|Qa9|-|17|17|protein-coding	5576.99	7508.53	3627.06	5573.53	0.499197	0.00586668	0.0842686	H2-Q9
Bcar1|AI385681|Cas|Crkas|-|8|8 D3|protein-coding	6.86	13.36	5.58	22.91	1.52053	0.0059037	0.0847054	Bcar1
Xrra1|AI449753|-|7|7 E1|protein-coding	18.29	4.77	8.38	1.99	-1.90407	0.00592435	0.0849511	Xrra1
Lman1l|BC020188|slamp|-|9|9 B|protein-coding	0	4.77	0	3.98	5.1695	0.00594013	0.0851266	Lman1l
Ap1m2|D9Ertd818e|[m]1B|mu1B|-|9 A3|9 7.76 cM|protein-coding	5.71	0	3.72	0	-5.25692	0.00595003	0.0851669	Ap1m2
Cecr6|AW048664|-|6 F1|6 56.95 cM|protein-coding	1.14	4.77	0	6.97	3.21529	0.00594987	0.0851669	Cecr6
Igf2bp2|C330012H03Rik|IMP-2|Imp2|Neilsen|-|16|16 B1|protein-coding	78.86	47.73	80.04	52.79	-0.671179	0.00596195	0.0852867	Igf2bp2
Tmem8b|4930500O05Rik|-|4|4 B1|protein-coding	52.57	71.59	39.09	80.67	0.732224	0.00597388	0.0854067	Tmem8b
Cav2|AI447843|-|6|6 A2|protein-coding	30.86	50.59	29.78	55.78	0.798978	0.00597791	0.0854134	Cav2
Vangl1|Kitenin|Lpp2|Stb2|Stbm|-|3|3 F2.2|protein-coding	11.43	16.23	8.38	33.86	1.32479	0.00600903	0.0858071	Vangl1
Il17ra|AW538159|Cdw217|Il17r|VDw217|-|6 F1|6 56.95 cM|protein-coding	6176.98	7209.76	6112.11	7137.22	0.213166	0.00601598	0.0858554	Il17ra
Nup54|3110079L04Rik|54kDa|-|5|5 E3|protein-coding	1879.95	1617.02	1883.8	1595.57	-0.238497	0.00606878	0.0865575	Nup54
Lyar|MLZ-264|-|5 B3|5 20.29 cM|protein-coding	3842.18	3360.04	3921.17	3374.39	-0.215524	0.00607996	0.0866656	Lyar
Ifitm5|1110003J06Rik|AW213665|Bril|DSPA1|Hrmp1|Hrtm1|-|7|7 F5|protein-coding	78.86	124.09	71.67	106.57	0.61075	0.00611228	0.0870746	Ifitm5
Lpcat4|AI505034|Agpat7|Aytl3|LPEAT2|-|2|2 E3|protein-coding	1383.96	1613.2	1348.63	1654.33	0.247669	0.00613051	0.0872355	Lpcat4
Bcl6|Bcl5|-|16 B1|16 15.26 cM|protein-coding	146.28	187.09	137.75	215.13	0.491642	0.00613083	0.0872355	Bcl6
Batf|B-ATF|SFA-2|-|12|12 D2|protein-coding	543.99	683.46	503.53	650.38	0.340307	0.0061631	0.0876428	Batf
Plvap|MECA32|Pv1|-|8 B3.3|8 34.43 cM|protein-coding	56	40.09	79.11	40.84	-0.759059	0.00616887	0.0876731	Plvap
Optn|4930441O07Rik|FIP2|HYPL|NRP|-|2 A1|2 3.15 cM|protein-coding	35.43	48.68	28.85	63.74	0.800547	0.00618993	0.0879204	Optn
Lemd2|BC026588|Lem2|NET25|-|17|17 A3.3|protein-coding	1109.68	1463.33	1347.7	1575.65	0.293823	0.00621354	0.0882036	Lemd2
Cmpk1|0610011D08Rik|CK|Cmpk|UMP-CMPk|-|4|4 C7|protein-coding	3668.47	2973.44	3614.03	3311.65	-0.224089	0.00622539	0.0883198	Cmpk1
Zc3hc1|1110054L24Rik|AU018540|AU019789|HSPC216|Nipa|-|6|6 A3.3|protein-coding	1521.1	1307.74	1477.07	1183.23	-0.276119	0.00623573	0.0884142	Zc3hc1
Plpp6|4932443D16Rik|Ppapdc2|-|19|19 C1|protein-coding	286.85	376.09	323.89	444.21	0.410872	0.00623976	0.0884193	Plpp6
Plod1|2410042F05Rik|AI854890|AV007929|Lh1|Plod|-|4 E2|4 78.57 cM|protein-coding	201.14	293.05	247.57	326.68	0.449641	0.00626551	0.0887319	Plod1
Plekhm3|9430067K14Rik|A230102O09Rik|AI449570|DAPR|Plekhm1l|-|1|1 C2|protein-coding	297.13	401.87	282.94	370.51	0.404947	0.00627019	0.0887459	Plekhm3
Ogn|3110079A16Rik|OG|OIF|SLRR3A|mimecan|mimican|-|13|13 A5|protein-coding	49.14	54.41	53.05	222.1	1.40794	0.00630157	0.0891376	Ogn
Furin|9130404I01Rik|Fur|PACE|Pcsk3|SPC1|-|7 45.65 cM|7 D1-E2|protein-coding	1827.38	2242.25	1797.24	2084.59	0.246259	0.00631548	0.0892818	Furin
Mybpc3|-|-|2|2 E1|protein-coding	115.43	73.5	119.13	84.66	-0.580698	0.00634109	0.0895912	Mybpc3
Hist1h3c|H3-143|-|13|13 A2-A3|protein-coding	199.99	163.23	215.93	116.53	-0.578619	0.00635635	0.089754	Hist1h3c
Sec61g|-|-|11|11 A2|protein-coding	2322.22	1828.93	2057.85	1874.44	-0.252082	0.00636723	0.089855	Sec61g
Gm14085|OTTMUSG00000015615|-|2|2 E5|protein-coding	511.99	431.46	593.81	434.25	-0.365265	0.00639274	0.0901621	Gm14085
Myo1c|C80397|MMIb|MYO1E|NMI|mm1beta|myr2|-|11 45.92 cM|11 C-E1|protein-coding	1447.96	1178.88	1770.25	1421.27	-0.32097	0.00640538	0.0902873	Myo1c
Airn|2810051F02Rik|2810434M15Rik|AI256653|AI597500|AW049873|Air|B930018I07Rik|D17Ertd663e|IGF2RAS|-|17 8.66 cM|17 A1|ncRNA	0	3.82	0.93	7.97	3.22289	0.00641322	0.0903449	Airn
Ltk|-|-|2 E5|2 59.97 cM|protein-coding	100.57	129.82	95.87	162.35	0.560874	0.00643632	0.0906171	Ltk
Prrx2|Prx2|S8|-|2 B|2 21.74 cM|protein-coding	1.14	2.86	1.86	19.92	2.76929	0.00645157	0.0907787	Prrx2
6530402F18Rik|mKIAA1857|-|2|2|ncRNA	1522.24	1319.2	1489.17	1178.25	-0.278635	0.0064854	0.0911481	6530402F18Rik
Slc38a2|5033402L14Rik|AI316867|ATA2|SAT2|mKIAA1382|-|15|15 F1|protein-coding	10252.3	8290.31	10751.8	9724.79	-0.23368	0.00648281	0.0911481	Slc38a2
Pdlim5|1110001A05Rik|AI987914|C87059|Enh|Enh1|Enh2|Enh3|LIM|-|3|3 H3|protein-coding	586.27	697.78	576.12	759.94	0.315627	0.00649499	0.0912296	Pdlim5
2510039O18Rik|Kiaa2013|-|4|4 E1|protein-coding	2764.5	3379.13	2970.89	3359.45	0.222012	0.00654916	0.0919273	2510039O18Rik
Camk2b|-|-|11 A1|11 3.89 cM|protein-coding	238.85	363.69	228.96	291.82	0.479954	0.00655231	0.0919273	Camk2b
Ada|-|-|2 84.44 cM|2 H3|protein-coding	1603.39	1288.65	1382.14	1122.47	-0.316159	0.00657419	0.0921804	Ada
Tmem223|0610006I08Rik|-|19|19 A|protein-coding	909.69	1147.38	1060.1	1297.77	0.298604	0.00660896	0.092614	Tmem223
Exoc6|4833405E05Rik|AW413330|C430002C19|Sec15|Sec15l1|hbd|msec15|-|19 C2|19 32.32 cM|protein-coding	1441.1	1174.1	1301.16	1088.61	-0.285848	0.00662944	0.092847	Exoc6
Atpif1|Atpi|IF(1)|If1|-|4|4 D2.3|protein-coding	3994.18	3358.13	4041.23	3623.39	-0.2141	0.0066522	0.0931114	Atpif1
Socs5|1810018L08Rik|Cish5|mKIAA0671|-|17|17 E4|protein-coding	1030.83	729.28	1192.27	998.97	-0.377965	0.00667132	0.0932753	Socs5
Atf6|9130025P16Rik|9630036G24|AA789574|Atf6alpha|ESTM49|-|1 H3|1 76.96 cM|protein-coding	1713.1	2060.89	1477.07	1860.5	0.289468	0.00667167	0.0932753	Atf6
Pygm|AI115133|PG|-|19 A|19 4.53 cM|protein-coding	110.85	161.32	114.48	161.35	0.506486	0.00669808	0.0934816	Pygm
Cald1|4833423D12Rik|AI195384|AV071549|AW536160|C920027I18Rik|-|6 B1|6 15.07 cM|protein-coding	44.57	54.41	43.74	134.46	1.074	0.00669753	0.0934816	Cald1
Eif3a|A830012B05Rik|Csma|Eif3|Eif3s10|mKIAA0139|-|19|19 D|protein-coding	20559.5	17422.5	20546.8	18508.4	-0.205239	0.00669146	0.0934816	Eif3a
Hist1h2bl|H2b-291a|-|13|13 A2-A3|protein-coding	169.14	125.05	157.29	94.62	-0.575767	0.00670242	0.0934879	Hist1h2bl
1300002E11Rik|1500026P21Rik|-|16|16 B1|ncRNA	271.99	353.19	284.8	381.46	0.387602	0.00670702	0.0934978	1300002E11Rik
Mmab|9130222L19Rik|ATR|-|5|5 F|protein-coding	915.4	785.6	975.41	772.88	-0.289538	0.00671442	0.0935468	Mmab
Ltbp1|9430031G15Rik|9830146M04|Ltbp-1|Tgfb|b2b1000Clo|-|17|17 E3|protein-coding	4.57	8.59	6.52	29.88	1.73107	0.00673258	0.0937455	Ltbp1
Wtap|2810408K05Rik|9430038B09Rik|-|17|17 A1|protein-coding	2660.5	2082.84	2398.49	2230.01	-0.240881	0.00678686	0.0943524	Wtap
Sema4d|CD100|Semacl2|Semaj|Semcl2|coll-4|-|13|13 B1|protein-coding	9456.89	12158.2	8990.86	10236.7	0.271339	0.00678795	0.0943524	Sema4d
Parp3|A930002C11Rik|AW990611|Adprt3|Adprtl3|PARP-3|pADPRT-3|-|9|9 F1|protein-coding	413.7	536.46	454.2	574.68	0.343608	0.00678752	0.0943524	Parp3
Srgn|Prg|Prg1|Sgc|-|10|10 B4|protein-coding	9400.89	10675.8	9375.25	11137.1	0.205407	0.00681411	0.0946615	Srgn
Fam78a|A130092J06Rik|-|2|2 B|protein-coding	2062.8	2620.25	2239.34	2487.97	0.23766	0.00683001	0.0948276	Fam78a
Esam|2310008D05Rik|Esam1|W117m|-|9|9 B|protein-coding	8	2.86	16.75	3.98	-1.86462	0.00684365	0.0949199	Esam
Cnot1|6030411K04Rik|AA815922|D830048B13|-|8|8 D1|protein-coding	15985.9	13451.6	15377.5	13908.9	-0.207845	0.00684456	0.0949199	Cnot1
Cep78|5730599I05Rik|D030027P05|-|19|19 A|protein-coding	1023.97	893.46	1069.41	832.64	-0.288018	0.00692903	0.0960359	Cep78
Kifap3|KAP-3|KAP3|SMAP|-|1|1 H1|protein-coding	490.27	371.32	491.43	403.37	-0.352789	0.006944	0.096188	Kifap3
Rnaset2a|0610007O07Rik|4833423A10Rik|4930532K22Rik|C79750|RNASE6PL|Rnaset2|-|17|17 B2|protein-coding	4417.02	5296.83	4646.21	5276.72	0.212	0.00695254	0.0962267	Rnaset2a
Mut|D230010K02Rik|Mcm|-|17 19.55 cM|17 C-D|protein-coding	1430.82	1077.69	1269.52	1165.3	-0.277983	0.0069548	0.0962267	Mut
Naip6|Birc1f|Naip-rs4|Naip-rs4A|-|13 D1|13 53.09 cM|protein-coding	173.71	238.64	190.8	260.95	0.440709	0.00696549	0.0963193	Naip6
Rragd|5730543C08Rik|AI467523|C030003H22Rik|D4Ertd174e|-|4 A5|4 14.57 cM|protein-coding	77.71	126.96	113.55	186.25	0.688004	0.00698545	0.0964929	Rragd
Fbn1|AI536462|B430209H23|Fib-1|Tsk|-|2 F|2 61.38 cM|protein-coding	144	158.46	143.33	405.37	0.95082	0.00698607	0.0964929	Fbn1
Pcm1|2600002H09Rik|9430077F19Rik|C030044G17Rik|-|8 A4|8 23.89 cM|protein-coding	4298.17	3495.58	3889.52	3539.73	-0.229144	0.00699132	0.0965099	Pcm1
Trim46|TRIFIC|-|3|3 F1|protein-coding	188.57	321.69	261.54	316.72	0.488478	0.00699903	0.0965155	Trim46
Fmnl1|8030453N10Rik|AI553564|Fmnl|Fnrl|Frls|-|11|11 D|protein-coding	6358.69	7371.08	6454.62	7509.72	0.205242	0.00699975	0.0965155	Fmnl1
Pak6|4732456M09|-|2|2 E5|protein-coding	84.57	63	117.27	65.73	-0.667117	0.00701141	0.0966209	Pak6
Snx5|0910001N05Rik|1810032P22Rik|AU019504|D2Ertd52e|-|2 70.98 cM|2 H1|protein-coding	10022.6	8413.45	9417.14	8455.9	-0.215099	0.00702445	0.096745	Snx5
Rnf144b|BC025007|E130105P19Rik|Ibrdc2|Pir2|-|13|13 A5|protein-coding	29.71	78.27	57.71	76.69	0.792805	0.00702931	0.0967566	Rnf144b
Gm13251|OTTMUSG00000011097|-|4|4 E1|protein-coding	2306.22	1804.11	2133.24	1983	-0.240295	0.00704612	0.0969326	Gm13251
Hsf2bp|4932437G14Rik|-|17|17 B1|protein-coding	12.57	25.77	17.68	38.84	1.05501	0.00705527	0.0970029	Hsf2bp
Cul9|1810035I07Rik|Cul-9|Parc|mKIAA0708|-|17|17 C|protein-coding	201.14	263.46	220.58	315.73	0.442915	0.00712925	0.0978523	Cul9
Grb10|5730571D09Rik|AI325020|Meg1|mKIAA0207|-|11 A1|11 7.15 cM|protein-coding	102.85	51.55	99.59	77.69	-0.661174	0.00712578	0.0978523	Grb10
Spsb4|D030068E18Rik|SSB-4|Ssb4|-|9|9 E3.3|protein-coding	266.28	194.73	335.06	239.04	-0.487026	0.00712135	0.0978523	Spsb4
Ccdc153|-|-|9|9 A5.2|protein-coding	60.57	45.82	88.42	43.82	-0.751813	0.00713548	0.0978818	Ccdc153
Prss23|2310046G15Rik|4930479H08Rik|AI790574|Spuve|-|7|7 E1|protein-coding	25.14	30.55	19.55	66.73	1.10722	0.00713992	0.097887	Prss23
Usp15|4921514G19Rik|AI327321|E430033I05Rik|Gcap18|-|10|10 D3|protein-coding	3716.47	3096.58	3498.62	3145.32	-0.219338	0.00715213	0.0979984	Usp15
B3gat3|2810405M13Rik|-|19|19 A|protein-coding	662.84	815.19	750.17	977.06	0.32907	0.00716571	0.0981287	B3gat3
Dcp2|2410015D23Rik|5730537H01Rik|AL118268|-|18|18 B3|protein-coding	4726.73	3948.04	4742.07	4291.69	-0.21193	0.00717028	0.0981353	Dcp2
Fbln1|-|-|15|15 E-F|protein-coding	10.29	22.91	14.89	31.87	1.07892	0.00718873	0.0983318	Fbln1
Prdm5|4432417F03Rik|6530401I24Rik|AI197291|E130112L17Rik|PFM2|-|6|6 C1|protein-coding	30.86	16.23	39.09	19.92	-0.970781	0.00722272	0.0984782	Prdm5
Sept1|Diff6|Pnutl3|-|7|7 F4|protein-coding	9637.46	11785.9	9646.1	10890.1	0.224407	0.00721499	0.0984782	Sept1
Npas2|MOP4|bHLHe9|-|1 B|1 17.98 cM|protein-coding	130.28	194.73	112.62	161.35	0.547812	0.00722308	0.0984782	Npas2
Derl3|1810006I20Rik|1810063P04Rik|IZP6|derlin-3|-|10|10 C1|protein-coding	4.57	7.64	1.86	15.94	1.86815	0.007224	0.0984782	Derl3
Hist2h2be|AV127319|H2b-613|T25626|-|3|3 F1-F2|protein-coding	96	138.41	121	199.2	0.617048	0.00720549	0.0984782	Hist2h2be
Tcte1|D17Sil1|Tcte-1|-|17 22.54 cM|17 C|protein-coding	59.43	39.14	59.57	32.87	-0.730161	0.00721593	0.0984782	Tcte1
4930523C07Rik|-|-|1|1 H2.1|protein-coding	761.12	958.37	720.39	885.43	0.307118	0.00724055	0.0985631	4930523C07Rik
Matn4|matrilin-4|-|2 H3|2 85.16 cM|protein-coding	0	1.91	0	6.97	5.17056	0.00725892	0.0985631	Matn4
Lilrb4a|CD85K|Gp49b|HM18|ILT3|LIR-5|Lilrb4|gp49|-|10 25.5 cM|protein-coding	505.13	621.42	413.24	585.64	0.38748	0.00725185	0.0985631	Lilrb4a
Hist1h3h|H3-291|-|13|13 A2-A3|protein-coding	194.28	151.77	190.8	109.56	-0.56436	0.00725587	0.0985631	Hist1h3h
Zfp503|AI181838|B830002A16Rik|Nolz-1|Nolz1|Znf503|-|14 A3|14 12.0 cM|protein-coding	102.85	46.77	114.48	84.66	-0.744297	0.00725738	0.0985631	Zfp503
Mmp2|Clg4a|GelA|MMP-2|-|8 C5|8 44.99 cM|protein-coding	53.71	58.23	52.12	201.19	1.26782	0.00725452	0.0985631	Mmp2
Irx2|IRX6|-|13 C1|13 39.23 cM|protein-coding	0	1.91	0	6.97	5.17055	0.0072554	0.0985631	Irx2
Sfxn3|-|-|19|19 D1|protein-coding	715.41	898.24	657.1	825.67	0.320797	0.00731069	0.09921	Sfxn3
Tmem154|9930117H01Rik|-|3|3 F1|protein-coding	409.13	307.37	400.21	323.69	-0.369209	0.0073307	0.0994254	Tmem154
Rnaset2b|0610007O07Rik|4833423A10Rik|4930532K22Rik|C79750|RNASE6PL|Rnaset2|-|17|17|protein-coding	9014.61	10762.6	9447.85	10709.8	0.207652	0.00734233	0.099527	Rnaset2b
Cpne2|3322401K10Rik|-|8|8 C5|protein-coding	4897.01	5903.93	4792.33	5492.85	0.224732	0.00734898	0.0995611	Cpne2
Tmem173|2610307O08Rik|ERIS|MPYS|Mita|STING|-|18|18 B3|protein-coding	4407.88	5018.1	3747.12	4801.64	0.258255	0.00739291	0.100043	Tmem173
Inpp5d|SHIP|SHIP-1|SHIP1|SIP-145|p150Ship|s-SHIP|-|1 44.44 cM|1 C5|protein-coding	5194.15	6143.52	5125.54	5911.16	0.214357	0.00739091	0.100043	Inpp5d
Bcap29|AW208404|Bap29|-|12 A3|12 13.63 cM|protein-coding	1606.81	1299.15	1521.75	1352.55	-0.248836	0.00740464	0.10009	Bcap29
Rffl|1700051E09Rik|4930516L10Rik|BG080975|Carp2|-|11|11 B5|protein-coding	467.42	337.91	486.77	404.37	-0.375259	0.00740363	0.10009	Rffl
H2-Q6|0610037M15Rik|H-2Q6|Qa-6|Qa6|-|17 B1|17 18.66 cM|protein-coding	4062.75	5492.51	2855.48	4012.82	0.450913	0.00751698	0.101551	H2-Q6
Pla2r1|Pla2-r|Pla2g1br|Pla2r|-|2|2 C1.1|protein-coding	2.29	10.5	7.45	20.92	1.58614	0.00753197	0.101696	Pla2r1
H2-Q8|H-2Q8|MMS10-T|Ms10t|Qa-2|Qa-8|Qa8|-|17 B1|17|protein-coding	4092.46	5530.69	2879.68	4041.7	0.449854	0.00756517	0.10203	H2-Q8
Mllt11|AI839562|Af1q|Zfp692|-|3|3 F2.1|protein-coding	322.28	407.6	321.1	426.28	0.363492	0.00756183	0.10203	Mllt11
Wisp2|Ccn5|Crgr4|Ctgfl|Rcop1|-|2|2 H3|protein-coding	34.28	46.77	46.54	152.39	1.27095	0.00757806	0.102147	Wisp2
Naip7|Birc1g|Naip-rs4B|Naip6|-|13 D1|13|protein-coding	144	211.91	170.32	227.08	0.465999	0.00759642	0.102337	Naip7
Nckap5|8430408F21|D130011D22Rik|E030049G20Rik|Erih1|Erih2|Gm1548|Nap5|-|1|1 E3|protein-coding	28.57	19.09	48.4	19.92	-1.00502	0.00760711	0.102423	Nckap5
Tmcc2|1110063G11Rik|-|1|1 E4|protein-coding	26.29	10.5	45.61	22.91	-1.13574	0.00762869	0.102656	Tmcc2
Dap|4921531N22Rik|AI789753|AU040360|-|15|15 B2|protein-coding	2830.78	3735.18	2915.98	3191.13	0.260901	0.0076332	0.10266	Dap
Nrp1|C530029I03|NP-1|NPN-1|Npn1|Nrp|-|8 75.78 cM|8 E|protein-coding	465.13	643.37	630.1	884.43	0.464188	0.0076389	0.102679	Nrp1
Fam219aos|1700066J24Rik|-|4|4 A5|ncRNA	13.71	26.73	11.17	26.89	1.10253	0.00765635	0.102856	Fam219aos
C330006A16Rik|AI551216|-|2|2 A3|protein-coding	1278.82	1552.11	1353.28	1589.59	0.244194	0.00766257	0.102882	C330006A16Rik
Cpd|AA960140|AW322530|D830034L15Rik|-|11 B5|11 46.05 cM|protein-coding	741.69	839.05	752.03	1050.76	0.326103	0.00766723	0.102887	Cpd
Igll1|BB139905|Igl-5|Igll|Lambda5|-|16|16 10.45 cM|protein-coding	10.29	2.86	13.96	3.98	-1.81742	0.0076965	0.103222	Igll1
Sys1|2610042O14Rik|AI266964|C87389|-|2|2 H3|protein-coding	590.84	804.69	648.72	752.96	0.318849	0.00770656	0.103294	Sys1
Hmgcr|HMG-CoAR|Red|-|13 D1|13 50.65 cM|protein-coding	9900.31	7867.45	8295.61	7371.28	-0.26583	0.00771047	0.103294	Hmgcr
Omg|-|-|11 B5|11 46.79 cM|protein-coding	2.29	13.36	4.65	10.96	1.72335	0.00772849	0.103464	Omg
Paox|2410012F02Rik|AI118225|Pao|-|7|7 F4|protein-coding	1020.54	935.46	1122.46	777.86	-0.331308	0.00773602	0.103464	Paox
Fbxw4|Dac|Fbw4|SHFM3|SHSF3|dactylin|dactylyn|-|19 C3|19 38.75 cM|protein-coding	885.69	704.46	829.28	700.18	-0.297253	0.00773591	0.103464	Fbxw4
Dnajb1|0610007I11Rik|DjB1|HSPF1|Hdj1|Hsp40|-|8|8 C3|protein-coding	2861.64	3497.49	3200.78	3636.34	0.223595	0.00776704	0.103821	Dnajb1
Tle3|2610103N05Rik|ESG|Grg3a|Grg3b|mKIAA1547|-|9|9 C|protein-coding	10003.2	12088.5	8947.12	10712.8	0.257758	0.00781452	0.104398	Tle3
Tanc2|3526402J09Rik|5730590C14Rik|-|11|11 E1|protein-coding	538.27	706.37	547.27	660.34	0.322689	0.00783067	0.104555	Tanc2
Susd1|A530080P10|Gm12528|OTTMUSG00000007332|-|4|4 B3|protein-coding	4316.46	3674.08	4040.3	3530.76	-0.223681	0.00785458	0.104594	Susd1
Lamp1|AI196048|CD107a|Lamp-1|-|8 A1.1|8 5.73 cM|protein-coding	4791.87	5582.24	4731.84	5500.82	0.208644	0.0078522	0.104594	Lamp1
Taldo1|-|-|7|7 F3-F4|protein-coding	6947.24	6165.47	7284.83	6272.71	-0.204907	0.00784926	0.104594	Taldo1
Ahctf1|6230412P20Rik|AV011447|Elys|-|1 H4|1 83.62 cM|protein-coding	4495.88	3759.04	4336.28	3936.13	-0.209611	0.00785326	0.104594	Ahctf1
Uchl1|AW822034|C88048|PGP 9.5|PGP9.5|R75593|UCH-L1|UCHL-1|gad|-|5 C3.1|5 35.95 cM|protein-coding	43.43	26.73	45.61	23.9	-0.821527	0.00785529	0.104594	Uchl1
Gstm1|Gstb-1|Gstb1|-|3|3 F2.3|protein-coding	93.71	125.05	90.28	143.42	0.534168	0.00787096	0.104744	Gstm1
Gli2|-|-|1 E2-E4|1 52.17 cM|protein-coding	10.29	8.59	24.2	1.99	-1.69948	0.0078997	0.105069	Gli2
Fbrsl1|2410025L10Rik|AI467568|Gm1049|Gm29766|mKIAA1545|-|5|5 F|protein-coding	843.41	1002.28	778.09	989.01	0.287417	0.00794984	0.105677	Fbrsl1
Hmbox1|AI451877|AI604847|F830020C16Rik|-|14|14 D1|protein-coding	861.69	713.05	819.04	647.39	-0.313389	0.00796122	0.10577	Hmbox1
Aim1|AI462491|AI463325|-|10 B2|10 23.14 cM|protein-coding	25.14	40.09	25.13	51.79	0.853631	0.00797524	0.105898	Aim1
Kif14|D1Ertd367e|E130203M01|-|1 59.8 cM|1 F|protein-coding	1711.95	1433.74	1612.03	1379.44	-0.249993	0.00799092	0.10593	Kif14
Ifitm7|4933438K12Rik|Mil4|-|16|16 A1|protein-coding	90.28	127.91	72.6	117.53	0.589761	0.00798795	0.10593	Ifitm7
Mamdc2|1200015L10Rik|AI591564|mamcan|-|19|19 B|protein-coding	22.86	38.18	19.55	40.84	0.892258	0.00798485	0.10593	Mamdc2
Stambpl1|1700095N21Rik|8230401J17Rik|ALMalpha|AMSH-FP|-|19|19 C1|protein-coding	231.99	312.14	241.99	316.72	0.396423	0.00799971	0.105988	Stambpl1
Alg6|E230028F23Rik|-|4|4 C6|protein-coding	417.13	311.19	419.76	343.61	-0.365381	0.00805078	0.106606	Alg6
Zbtb5|5930421I10|9430083K24Rik|AI646847|mKIAA0354|-|4|4 B1|protein-coding	1183.97	962.19	1236.01	1068.69	-0.264833	0.00807638	0.106886	Zbtb5
Gm16023|OTTMUSG00000029160|-|4|4 86.65 cM|ncRNA	123.43	78.27	125.65	93.62	-0.547318	0.0081754	0.108137	Gm16023
Slc5a9|AI159731|SGLT4|-|4|4 D1|protein-coding	114.28	217.64	210.35	343.61	0.769011	0.00819006	0.108212	Slc5a9
Cd48|AI449234|AW610730|BCM1|BLAST|BLAST-1|BLAST1|Bcm-1|MEM-102|SLAMF2|Sgp-60|-|1 H3|1 79.54 cM|protein-coding	6247.83	5400.87	5873.84	5024.74	-0.22692	0.00818893	0.108212	Cd48
Zfp467|1190001I08Rik|AB041616|AI426952|AV017623|EZI|MNCb-3350|Znf467|-|6|6 B2.3|protein-coding	19.43	35.32	28.85	59.76	0.94067	0.00820636	0.108368	Zfp467
Cux1|CDP|Cutl1|Cux|Cux-1|-|5 G2|5 75.96 cM|protein-coding	7413.51	9165.64	8005.22	8852.31	0.214895	0.0082737	0.109197	Cux1
Sepw1|selW|-|7|7 A2|protein-coding	2071.94	2478.98	2217	2552.71	0.219317	0.00828423	0.109263	Sepw1
Mycn|N-myc|Nmyc|Nmyc-1|Nmyc1|bHLHe37|c-nmyc|-|12 6.14 cM|12 A3-B|protein-coding	1564.53	1340.2	1634.36	1391.39	-0.238897	0.00828775	0.109263	Mycn
Zfp746|2810407L07Rik|AI317225|Znf746|-|6|6 B2.3|protein-coding	1571.39	1799.34	1598.07	1949.14	0.230672	0.00831373	0.109485	Zfp746
Itgb5|AA475909|AI874634|ESTM23|[b]-5|[b]5|[b]5A|[b]5B|beta-5|beta5|-|16|16 B3|protein-coding	40	65.86	61.43	129.48	0.916477	0.00831303	0.109485	Itgb5
Cd99l2|AW548191|Mic2l1|Xap89|-|X|X A6-B|protein-coding	133.71	203.32	153.57	198.2	0.468848	0.00832608	0.109588	Cd99l2
Smyd3|2410008A19Rik|Zmynd1|-|1 83.48 cM|1 H3|protein-coding	525.7	704.46	537.96	640.42	0.329088	0.00834607	0.109791	Smyd3
Il9r|-|-|11|11 A4|protein-coding	182.85	135.55	188.94	135.45	-0.466677	0.00837085	0.109946	Il9r
Dgke|C87606|DAGK6|DGK|-|11|11 C|protein-coding	2533.65	2769.17	2447.82	3086.55	0.22183	0.00837157	0.109946	Dgke
Map7d1|AV028413|BC019977|Mtap7d1|Parcc1|Rprc1|mKIAA1187|-|4|4 D2.2|protein-coding	4806.73	5815.15	4886.34	5505.8	0.214302	0.00836817	0.109946	Map7d1
Nxpe5|-|-|5|5 G2|protein-coding	133.71	91.64	120.06	81.67	-0.554819	0.00837911	0.109985	Nxpe5
Snx8|B130023O14Rik|-|5|5 G2|protein-coding	262.85	369.41	311.79	393.41	0.394112	0.00838913	0.110048	Snx8
Hs6st1|6Ost1|-|1|1 B|protein-coding	1148.54	1374.56	1182.03	1408.32	0.245033	0.00839304	0.110048	Hs6st1
Gpsm3|AA960287|AGS4|-|17|17 B1|protein-coding	1979.38	2565.85	1867.98	2141.37	0.283132	0.00841955	0.110335	Gpsm3
Fbxl14|AW322056|Fbx14l|-|6|6 F1|protein-coding	4583.88	5588.92	4763.48	5325.53	0.213832	0.00843132	0.110429	Fbxl14
1500012F01Rik|Zfas1|-|2|2 H3|protein-coding	1916.52	1603.65	1932.2	1712.1	-0.226151	0.00843764	0.110452	1500012F01Rik
Ccnf|CycF|Fbxo1|-|17 A3.3|17 12.32 cM|protein-coding	2318.79	2046.57	2436.65	2067.66	-0.219633	0.0084607	0.110511	Ccnf
Slc2a4|Glut-4|Glut4|-|11 42.93 cM|11 C-E1|protein-coding	9.14	0.95	9.31	2.99	-2.18214	0.00846515	0.110511	Slc2a4
Hopx|1110018K11Rik|1200015P04Rik|2300002F06Rik|AI848177|AW490897|Cameo|Hdop|Hod|Hop|Ob1|Obl|Toto|-|5|5 C3.3|protein-coding	40	66.82	40.95	64.74	0.688466	0.00846378	0.110511	Hopx
Bri3|I3|-|5|5 G2|protein-coding	310.85	511.64	419.76	484.05	0.433341	0.0084635	0.110511	Bri3
Colec12|CL-P1|SRCL|Scara4|-|18|18 A1|protein-coding	10.29	11.45	5.58	37.85	1.62121	0.00845601	0.110511	Colec12
Abcd3|AI313901|AU018866|AW146054|PMP68|PMP70|Pxmp1|-|3 52.94 cM|3 G-H1|protein-coding	761.12	624.28	809.74	664.32	-0.29747	0.00849433	0.110712	Abcd3
Hist1h2ai|H2a-291A|-|13|13 A2-A3|protein-coding	2002.23	1885.25	2471.09	1840.58	-0.27437	0.00848919	0.110712	Hist1h2ai
Mbnl1|Mbnl|mKIAA0428|-|3|3 E1|protein-coding	20799.4	23067.8	21051.3	25606.8	0.206305	0.00849184	0.110712	Mbnl1
Grap|8430435N19Rik|BB233594|-|11|11 B2|protein-coding	754.27	960.28	711.08	866.51	0.309862	0.00850374	0.110774	Grap
Rag1|Rag-1|-|2 E2|2 53.88 cM|protein-coding	3530.19	2790.17	5771.46	3903.26	-0.487693	0.00852049	0.110812	Rag1
Clip3|1500005P14Rik|AI844915|Clipr-59|-|7|7 B1|protein-coding	1.14	12.41	4.65	9.96	1.82174	0.00851615	0.110812	Clip3
Ntn4|-|-|10|10 C3|protein-coding	3.43	9.55	0.93	8.96	2.09318	0.00851185	0.110812	Ntn4
Nlrx1|BC034204|NOD9|-|9|9 A5.2|protein-coding	348.56	277.78	360.19	270.91	-0.379551	0.00852583	0.110822	Nlrx1
Cat|2210418N07|Cas-1|Cas1|Cs-1|-|2 E3|2 54.43 cM|protein-coding	2798.78	2406.43	2902.95	2554.7	-0.211923	0.00853099	0.110829	Cat
Morc4|1600017G11Rik|5630401M14Rik|AA117449|Zcwcc2|-|X|X F1|protein-coding	18.29	7.64	32.58	14.94	-1.2033	0.00855026	0.111019	Morc4
Slc35g3|Amac1|-|11|11 B4|protein-coding	1.14	3.82	1.86	12.95	2.33325	0.00860888	0.111683	Slc35g3
Hist1h2ak|-|-|13|13 A2-A3|protein-coding	1130.26	1056.69	1284.41	886.43	-0.322144	0.00861528	0.111683	Hist1h2ak
Lima1|Eplin|-|15 F1|15 56.13 cM|protein-coding	19.43	29.59	20.48	47.81	0.9326	0.00861247	0.111683	Lima1
Trim24|A130082H20Rik|AI447469|D430004I05Rik|TIF1|TIF1-alpha|TIF1alpha|Tif1a|-|6|6 B1|protein-coding	1178.25	1327.79	1095.47	1406.33	0.255893	0.00863698	0.111844	Trim24
Parp16|ARTD15|BC055447|C79952|PARP-16|-|9|9 C|protein-coding	1078.83	1335.42	1222.05	1449.16	0.262749	0.00863488	0.111844	Parp16
Bod1l|A230054D04Rik|AI853319|FAM44A|mKIAA1327|-|5|5 B3|protein-coding	3266.2	2700.44	3265.94	2977.99	-0.21356	0.00866947	0.112204	Bod1l
Postn|A630052E07Rik|AI747096|OSF-2|Osf2|PLF|PN|-|3|3 C|protein-coding	9.14	21	24.2	87.65	1.65471	0.00868688	0.112369	Postn
Fermt2|AA960555|Kindlin-2|Mig2|Plekhc1|-|14|14 C1|protein-coding	4.57	9.55	6.52	23.9	1.53087	0.00870929	0.112598	Fermt2
Gm15441|ENSMUSG00000074398|OTTMUSG00000021867|-|-|ncRNA	316.56	432.41	387.18	505.96	0.399725	0.00872446	0.112733	Gm15441
Trim37|1110032A10Rik|2810004E07Rik|AI848587|AU043018|MUL|TEF3|mKIAA0898|-|11|11 C|protein-coding	3939.32	3340.94	3807.62	3416.22	-0.207678	0.00878277	0.113426	Trim37
Tmem132a|6720481D13Rik|Hspa5bp1|Orai1|R74613|-|19|19 A|protein-coding	102.85	64.91	131.23	88.64	-0.627499	0.00883316	0.114016	Tmem132a
Ccm2l|-|-|2|2 H1|protein-coding	5.71	1.91	10.24	1	-2.39109	0.00885594	0.114248	Ccm2l
Rhobtb2|Dbc2|E130206H14Rik|mKIAA0717|-|14|14 D1|protein-coding	959.97	1221.83	1086.16	1259.92	0.26645	0.00889806	0.114669	Rhobtb2
Diaph2|Dia3|Diap2|Drf2|E430022I22Rik|-|X|X E3|protein-coding	1854.81	1649.47	1861.46	1501.94	-0.24693	0.00889593	0.114669	Diaph2
Olfml2b|1110018N05Rik|4832415H08Rik|AI467542|-|1|1 H3|protein-coding	22.86	30.55	31.64	119.52	1.42699	0.00891231	0.114791	Olfml2b
St3gal6|1700023B24Rik|AI930218|AW552396|Siat10|St3galVI|-|16|16 C1.2|protein-coding	9.14	21	14.89	30.88	1.06036	0.00893212	0.114984	St3gal6
Hist2h2bb|H2b-616|-|3|3 F1-F2|protein-coding	19.43	8.59	13.96	2.99	-1.48784	0.00894336	0.115067	Hist2h2bb
Slc39a10|2900042E17Rik|5430433I10|mKIAA1265|-|1|1 C1.1|protein-coding	1954.23	1661.88	2069.95	1804.72	-0.226848	0.0089839	0.11527	Slc39a10
Pole|-|-|5 53.45 cM|5 E3-E5|protein-coding	5419.28	4656.32	5099.48	4449.06	-0.2179	0.00899984	0.11527	Pole
AI837181|Bles03|N28173|-|19|19 A|protein-coding	1268.54	1572.15	1408.2	1629.43	0.246618	0.00900227	0.11527	AI837181
Cyp1b1|CP1B|P4501b1|-|17|17 E3|protein-coding	60.57	104.05	120.06	326.68	1.22665	0.00897646	0.11527	Cyp1b1
Lig3|D11Wsu78e|-|11 B5|11 50.23 cM|protein-coding	3033.06	2601.16	3090.96	2739.95	-0.20834	0.00899435	0.11527	Lig3
Fgl2|AI385601|musfiblp|-|5 A3|5 9.83 cM|protein-coding	1161.11	1382.2	1201.57	1434.22	0.242343	0.00897549	0.11527	Fgl2
Slc26a10|C78409|D630010I07|-|10|10 D3|protein-coding	6.86	10.5	3.72	21.91	1.60885	0.00899682	0.11527	Slc26a10
Coro1b|-|-|19 A|19 3.85 cM|protein-coding	5039.86	6210.34	5463.39	6043.63	0.212363	0.00899466	0.11527	Coro1b
Clstn3|CSTN3|Cs3|Cst-3|mKIAA0726|-|6|6 F2|protein-coding	18.29	10.5	23.27	7.97	-1.17662	0.00897978	0.11527	Clstn3
Il13|Il-13|-|11 B1.3|11 31.98 cM|protein-coding	0	5.73	7.45	39.84	2.48373	0.00905629	0.1159	Il13
Smarca2|2610209L14Rik|SNF2alpha|Snf2l2|brahma|brm|-|19 C1|19 21.17 cM|protein-coding	1649.1	1983.57	1800.96	2089.57	0.227879	0.00907137	0.116031	Smarca2
AI467606|-|-|7|7 F3|protein-coding	1532.53	1863.29	1505.92	1751.94	0.241434	0.00908135	0.116097	AI467606
Guca1a|GC-A|Gcap1|Guca1|mGCAP1|-|17|17 D|protein-coding	11.43	5.73	19.55	4.98	-1.54366	0.00908923	0.116136	Guca1a
Col4a3|[a]3(IV)|alpha3(IV)|-|1|1 C5|protein-coding	17.14	5.73	12.1	3.98	-1.55237	0.00911968	0.116464	Col4a3
Prmt7|4933402B05Rik|BC006705|-|8|8 D3|protein-coding	1679.95	1459.52	1729.3	1463.1	-0.232675	0.00912476	0.116467	Prmt7
Ubald1|1500031H01Rik|BC013706|Fam100a|-|16|16 A1|protein-coding	2035.37	2532.44	2107.17	2358.49	0.229995	0.00914976	0.116662	Ubald1
B330016D10Rik|-|-|4|4 E1|ncRNA	43.43	75.41	65.15	104.58	0.700426	0.00914936	0.116662	B330016D10Rik
Hist1h2be|-|-|13|13 A2-A3|protein-coding	146.28	111.68	149.85	96.61	-0.515747	0.00922335	0.117538	Hist1h2be
Il1rap|6430709H04Rik|AI255955|AV239853|IL-1RAcP|-|16|16 B2|protein-coding	197.71	124.09	172.19	141.43	-0.486401	0.00925803	0.117917	Il1rap
Cxx1c|2900027G03Rik|Mar8.1|Mart8a|-|X|X A5|protein-coding	22.86	41.05	16.75	33.86	0.924747	0.00927587	0.118082	Cxx1c
Abhd2|2210009N18Rik|LABH2|Labh-2|-|7|7 D2|protein-coding	4260.46	4877.78	3849.5	4683.12	0.227758	0.00933998	0.118835	Abhd2
Obfc1|0610009H20Rik|2310057J23Rik|AAF-44|AAF44|AI413458|RPA-32|-|19|19 D1|protein-coding	478.84	588.96	501.66	641.41	0.315364	0.00934818	0.118877	Obfc1
Mst1|D3F15S2h|D9H3F15S2|DNF15S2h|Hgfl|-|9 F2|9 59.07 cM|protein-coding	14.86	5.73	16.75	6.97	-1.31756	0.00937861	0.119201	Mst1
Mettl20|4833442J19Rik|AI256744|-|6|6 G3|protein-coding	185.14	251.05	198.25	263.94	0.412923	0.00940017	0.119348	Mettl20
Iqsec2|Brag1|-|X F3|X 68.46 cM|protein-coding	162.28	135.55	203.83	123.5	-0.512214	0.00939718	0.119348	Iqsec2
Tubd1|4930550G19Rik|Tubd|-|11|11 C|protein-coding	428.56	321.69	415.11	343.61	-0.35294	0.00945697	0.120006	Tubd1
Uqcrb|2210415M14Rik|QP-C|QPC|UQBC|UQBP|UQPC|-|13|13 B3|protein-coding	2147.37	1761.15	2176.98	1969.06	-0.224955	0.00947361	0.120154	Uqcrb
Scd3|4930513N16Rik|-|19|19 C3|protein-coding	1066.26	917.33	1043.35	821.69	-0.28728	0.00949023	0.120301	Scd3
Rps6ka4|1110069D02Rik|90kDa|AI848992|Msk2|mMSK2|-|19|19 A|protein-coding	527.99	621.42	470.95	639.42	0.327252	0.00956392	0.121172	Rps6ka4
Gch1|GTP-CH|GTPCH|Gch|-|14 24.6 cM|14 C2-3|protein-coding	389.7	492.55	370.43	480.06	0.346772	0.00958986	0.121436	Gch1
Saraf|1810045K07Rik|Tmem66|-|8|8 A4|protein-coding	4868.44	5710.15	5079	5801.61	0.200132	0.00959753	0.121469	Saraf
Evc2|1110017L09Rik|Lbn|limbin|-|5|5 B3|protein-coding	2.29	3.82	0	9.96	2.57621	0.00961313	0.121603	Evc2
Serpinh1|BERF-1|Cbp1|Cbp2|Hsp47|J6|Serpinh2|gp46|-|7|7 E2|protein-coding	86.85	92.59	102.38	362.54	1.23945	0.00964448	0.121935	Serpinh1
Tns1|1110018I21Rik|1200014E20Rik|AI648117|E030018G17Rik|E030037J05Rik|Tns|-|1 C3|1 38.17 cM|protein-coding	775.98	1138.78	1097.33	1310.71	0.373342	0.00965389	0.12199	Tns1
Xkr5|5430438H03Rik|XRG5|-|8|8 A1.3|protein-coding	669.7	508.78	550.06	398.39	-0.433056	0.00966996	0.122105	Xkr5
Dusp18|4930527G07Rik|AI430870|BB028064|DSP18|DUSP20|LMWDSP20|-|11|11 A1|protein-coding	34.28	45.82	17.68	49.8	0.895136	0.00967622	0.122105	Dusp18
Snx27|5730552M22Rik|ESTM45|ESTM47|R75405|-|3|3 F2|protein-coding	1882.24	1582.65	1940.57	1715.08	-0.224627	0.00967824	0.122105	Snx27
Oat|AI194874|-|7 F3|7 76.3 cM|protein-coding	2347.37	2057.07	2324.97	1979.02	-0.220886	0.00969848	0.122238	Oat
Pxdn|2310075M15Rik|C85409|E330004E07|VPO1|mKIAA0230|-|12|12 A2|protein-coding	13.71	24.82	26.99	90.63	1.4612	0.00970912	0.122238	Pxdn
Rhoq|Arhq|TC10A|Tc10|-|17 E4|17 56.9 cM|protein-coding	1438.82	1551.15	1361.66	1826.63	0.258528	0.00970706	0.122238	Rhoq
Maoa|1110061B18Rik|AA407771|-|X A2|X 11.78 cM|protein-coding	412.56	529.78	369.5	485.04	0.368605	0.00970655	0.122238	Maoa
Rimkla|B930030J24|NAAGS|NAAGS-II|Rimk|-|4|4 D2.1|protein-coding	75.43	111.68	90.28	135.45	0.557161	0.00974287	0.122599	Rimkla
Ppp1r32|4930579J09Rik|AU015816|IIIG9|IIIG9L|IIIG9S|-|19|19 A|protein-coding	2.29	13.36	2.79	6.97	1.93712	0.00975821	0.122728	Ppp1r32
Lactb|LACT-1|Lact1|Mrpl56|-|9|9 D|protein-coding	954.26	740.74	953.07	843.6	-0.279479	0.00981102	0.123327	Lactb
Hey2|CHF1|Herp1|Hrt2|bHLHb32|hesr2|-|10|10 A4|protein-coding	2.29	4.77	0.93	10.96	2.23869	0.00983469	0.123477	Hey2
Atg9a|AU019532|Apg9l1|Atg9|Atg9l1|-|1|1 C3|protein-coding	827.41	1058.6	917.7	1062.71	0.270043	0.00982873	0.123477	Atg9a
Ccne2|-|-|4|4 A2|protein-coding	1294.82	1003.24	1531.05	1284.82	-0.318552	0.00983835	0.123477	Ccne2
Setd2|4921524K10Rik|BC031601|KMT3A|-|9|9 F2|protein-coding	6226.12	5268.19	5800.32	5196.05	-0.210892	0.00985685	0.123645	Setd2
Dock7|3110056M06Rik|Gm430|m|-|4 C6|4 45.6 cM|protein-coding	210.28	146.05	247.57	185.25	-0.48264	0.00986797	0.12372	Dock7
Brca1|-|-|11 65.18 cM|11 D|protein-coding	2466.22	2080.93	2451.55	2199.13	-0.211272	0.00991037	0.124187	Brca1
Phka2|6330505C01Rik|D330034O08|Phk|-|X F3-F4|X 73.95 cM|protein-coding	1235.4	940.24	1194.13	1092.59	-0.268984	0.00997016	0.124851	Phka2
Gtpbp2|nmf205|-|17|17 C-D|protein-coding	2326.79	2759.62	2580.92	3006.88	0.220768	0.00997375	0.124851	Gtpbp2
Egfr|9030024J15Rik|AI552599|Erbb|Errb1|Errp|Wa5|wa-2|wa2|-|11 9.41 cM|11 A1-A4|protein-coding	6.86	8.59	7.45	40.84	1.74168	0.0099939	0.125038	Egfr
Rassf8|5133400D11Rik|AA815821|AW123240|Hoj1|mHoj-1|-|6|6 G3|protein-coding	30.86	44.86	37.23	78.68	0.833212	0.0100098	0.125173	Rassf8
Bcas3os1|8430403D17Rik|-|11|11 C|ncRNA	16	0.95	0.93	0	-3.78863	0.0100254	0.125302	Bcas3os1
Tpcn1|5730403B01Rik|Tpc1|mKIAA1169|-|5|5 F|protein-coding	2011.37	2441.75	2036.44	2313.67	0.222761	0.0100357	0.125321	Tpcn1
Lrp2bp|1700113N17Rik|2310006J04Rik|4930479L12Rik|MegBP|-|8|8 B2|protein-coding	1.14	5.73	0	4.98	3.09217	0.0100374	0.125321	Lrp2bp
Dym|1810041M12Rik|4933427L07Rik|C030019K18Rik|-|18|18 E2|protein-coding	1691.38	1505.33	1707.89	1375.45	-0.247914	0.0100599	0.125538	Dym
C1rl|C1r-LP|C1rl1|C1rlp|-|6|6 F2|protein-coding	4.57	0	6.52	1	-3.23855	0.0100728	0.125633	C1rl
Trim30b|A530023O14Rik|Trim30-1|-|7|7 E3|protein-coding	17.14	7.64	14.89	3.98	-1.43665	0.0101048	0.125966	Trim30b
Pik3c2b|C330011J12Rik|Gm199|PI3K-C2beta|PI3KC2beta|-|1|1 E4|protein-coding	343.99	205.23	241.99	205.17	-0.520029	0.0101189	0.126077	Pik3c2b
Exoc3l|C730015A04Rik|Exoc3l1|-|8|8 D3|protein-coding	354.28	427.64	347.16	472.1	0.34815	0.0101319	0.126131	Exoc3l
Rasgef1b|4732452O09Rik|GPIgamma4|Gpig4|-|5|5 E3|protein-coding	34.28	18.14	44.68	25.9	-0.864734	0.010139	0.126131	Rasgef1b
St6galnac5|AI851940|Siat7e|-|3|3 H3|protein-coding	16	34.36	13.96	25.9	1.00414	0.010136	0.126131	St6galnac5
Vrk3|AI428238|-|7|7 B4|protein-coding	1154.25	1415.61	1143.87	1337.61	0.251256	0.0101641	0.126378	Vrk3
Il3ra|CD123|CDw123|SUT-1|-|14 A2|14 7.08 cM|protein-coding	236.57	358.91	196.38	265.93	0.525244	0.010184	0.126432	Il3ra
Tfr2|Trfr2|-|5|5 G2|protein-coding	364.56	273	388.11	312.74	-0.374629	0.0101817	0.126432	Tfr2
Katnb1|2410003J24Rik|KAT|-|8|8 D1|protein-coding	1937.09	2298.57	1756.29	2114.47	0.248143	0.0101842	0.126432	Katnb1
Gpr132|G2a|-|12|12 F2|protein-coding	2132.51	2445.57	2067.15	2461.08	0.214356	0.0102092	0.126677	Gpr132
Rock2|B230113H15Rik|ROKalpha|Rho-kinase|Rock-II|Rock2m|mKIAA0619|-|12|12 A3|protein-coding	2721.07	2250.84	2767.99	2514.86	-0.215603	0.0102541	0.127169	Rock2
Sri|2210417O06Rik|2900070H08Rik|Sor|-|5 A1-h|5 3.38 cM|protein-coding	1873.09	2130.57	1955.47	2370.44	0.221534	0.010349	0.128279	Sri
Cln3|AI323623|-|7 F3|7 69.16 cM|protein-coding	575.98	695.87	536.1	689.22	0.307828	0.0103644	0.128404	Cln3
Igf1|C730016P09Rik|Igf-1|Igf-I|-|10 C1|10 43.7 cM|protein-coding	0	0.95	0	7.97	5.17151	0.0103724	0.128437	Igf1
Fam126a|AB030242|Drctnnb1a|-|5|5 A3|protein-coding	1652.53	1400.33	1746.05	1515.89	-0.232491	0.0103882	0.128567	Fam126a
Pdk2|-|-|11 D|11 59.01 cM|protein-coding	53.71	90.68	54.91	77.69	0.62247	0.0104092	0.12876	Pdk2
Gtpbp6|AV119224|Pgbpll|pgpl|-|5|5 E|protein-coding	678.84	832.37	696.19	847.58	0.278148	0.0104462	0.129151	Gtpbp6
Kel|CD238|Ece3|-|6 B2.1|6 19.86 cM|protein-coding	1.14	6.68	0	3.98	3.09154	0.0104652	0.12932	Kel
Plekha2|6430512N22Rik|AI851530|AU041791|TAPP2|W91773|-|8|8 A2|protein-coding	4387.31	3693.18	4057.99	3639.33	-0.21384	0.0104709	0.129324	Plekha2
Zfyve28|9630058O20Rik|Gm146|mKIAA1643|-|5|5 B2|protein-coding	52.57	72.55	49.33	86.65	0.633043	0.0104928	0.129528	Zfyve28
Med24|911GSE|AU040102|AW547152|D11Ertd307e|DRIP100|Gse2|Pparb2|Pparbp2|R75526|Thrap4|Trap100|-|11 D|11 62.46 cM|protein-coding	4231.89	3651.17	3931.41	3366.43	-0.227396	0.0105139	0.129593	Med24
Fmo1|-|-|1 70.34 cM|1 H1|protein-coding	0	1.91	0.93	9.96	3.22741	0.0105142	0.129593	Fmo1
Maml2|5930431H10|BC032967|-|9|9 A1|protein-coding	261.71	337.91	249.44	331.66	0.380754	0.0105074	0.129593	Maml2
Fam136a|2010309E21Rik|AW124904|Hyccin|-|6|6 D1|protein-coding	1418.25	1150.24	1531.05	1338.6	-0.257589	0.0105363	0.129701	Fam136a
Tpr|2610029M07Rik|C77892|-|1|1 G1|protein-coding	11602	9771.78	10724.8	9679.97	-0.20926	0.0105367	0.129701	Tpr
Adgrg5|Gm1109|Gpr114|PGR27|-|8|8 D1|protein-coding	3799.9	3379.13	3925.82	3387.34	-0.201679	0.0105392	0.129701	Adgrg5
Txnrd2|AA118373|ESTM573010|TGR|Tr3|Trxr2|Trxrd2|-|16 A3|16 11.41 cM|protein-coding	531.41	443.87	566.82	441.22	-0.322267	0.010564	0.129921	Txnrd2
Khk|-|-|5 B1|5 16.9 cM|protein-coding	289.14	251.05	342.51	221.11	-0.43074	0.0105679	0.129921	Khk
Rad51ap1|2510006L10Rik|RAB22|-|6 F3|6 61.92 cM|protein-coding	1715.38	1487.2	1627.85	1316.69	-0.262233	0.0105929	0.130163	Rad51ap1
Pdxp|1600027H05Rik|AB041662|PLPP|-|15|15 E1|protein-coding	1047.97	1272.42	1151.31	1365.49	0.250177	0.0106192	0.130419	Pdxp
Psmb8|Lmp-7|Lmp7|-|17 B1|17 17.98 cM|protein-coding	13224.8	16035.6	13382	14943.7	0.210033	0.0106388	0.130593	Psmb8
Itga5|Cd49e|Fnra|VLA5|-|15 F3|15 58.9 cM|protein-coding	1206.82	973.65	1237.87	1092.59	-0.254548	0.0106471	0.130628	Itga5
Gpatch4|2610029K21Rik|Gpatc4|-|3|3 F1|protein-coding	1893.66	1533.02	1775.83	1620.47	-0.229088	0.0106702	0.130845	Gpatch4
Adrb2|Adrb-2|Badm|Gpcr7|-|18 E1|18 35.1 cM|protein-coding	122.28	147.96	77.25	160.35	0.626742	0.0106819	0.130921	Adrb2
Btla|A630002H24|-|16|16 B5|protein-coding	4.57	16.23	6.52	13.94	1.39503	0.01069	0.130954	Btla
Eif1ax|1500010B24Rik|AI426898|Eif1ay|-|X|X F4|protein-coding	4044.46	3643.54	4166.88	3528.77	-0.205146	0.0107346	0.131299	Eif1ax
Dst|2310001O04Rik|A830042E19Rik|AW554249|BP230|BPAG1-n|Bpag|Bpag1|Macf2|ah|athetoid|dt|mKIAA0728|nmf203|nmf339|-|1 B|1 12.91 cM|protein-coding	2237.65	2882.76	2601.39	2842.54	0.231882	0.0107327	0.131299	Dst
Sh2d2a|Lad|Ribp|Tsad|-|3 F1|3 38.78 cM|protein-coding	1883.38	2421.71	1798.17	2039.78	0.269223	0.0107324	0.131299	Sh2d2a
Dda1|1500034J01Rik|1700095J19Rik|R74921|-|8|8 C1|protein-coding	2091.37	2446.53	2110.9	2451.12	0.210575	0.0107414	0.131316	Dda1
Mbd6|D10Wsu93e|-|10 D3|10 74.5 cM|protein-coding	3140.49	3722.77	3378.55	3846.49	0.204514	0.0107573	0.131444	Mbd6
Gpnmb|DC-HIL|Dchil|ipd|-|6 B2.3|6 23.82 cM|protein-coding	64	131.73	88.42	104.58	0.615333	0.0107823	0.131683	Gpnmb
Paics|2610511I09Rik|ADE2H1|AIRC|PAIS|-|5|5 E1|protein-coding	14520.8	12577.2	14253.2	12747.6	-0.194774	0.0108074	0.131922	Paics
Jdp2|Jundm2|Jundp2|TIF|-|12|12 D3|protein-coding	1325.68	1661.88	1384.93	1565.69	0.241936	0.0108232	0.132048	Jdp2
Gpr68|BB131428|Ogr1|-|12|12 E|protein-coding	246.85	341.73	323.89	469.11	0.489172	0.0108522	0.1322	Gpr68
Frmd7|EG665849|Gm1533|-|X|X A5|protein-coding	418.27	273.96	388.11	343.61	-0.396793	0.0108471	0.1322	Frmd7
6430573F11Rik|Kiaa1456|TRM9L|-|8|8 A4|protein-coding	3.43	0	7.45	1	-3.23136	0.0108443	0.1322	6430573F11Rik
Tesc|1010001A17Rik|2410011K10Rik|TE-1|-|5 F|5 57.84 cM|protein-coding	16	31.5	13.96	27.89	0.981233	0.0108692	0.13234	Tesc
Capn2|AI326419|Capa-2|Capa2|m-calpain|m-calpin|-|1|1 H5|protein-coding	1037.69	1258.1	1085.23	1273.86	0.243278	0.0109384	0.133115	Capn2
Gm13051|OTTMUSG00000010104|OTTMUSG00000010173|-|4 E1|4|protein-coding	587.41	416.19	510.04	452.18	-0.347133	0.0109486	0.133172	Gm13051
Fam171a2|-|-|11|11 D|protein-coding	289.14	219.55	348.09	259.95	-0.425304	0.0109932	0.133647	Fam171a2
Rgs17|6430507P11Rik|Rgsz2|-|10|10 A1|protein-coding	0	3.82	0	3.98	5.00471	0.0110066	0.133704	Rgs17
Cd2|LFA-2|Ly-37|Ly37|-|3 F2.2|3 44.17 cM|protein-coding	56	100.23	58.64	78.68	0.632695	0.011009	0.133704	Cd2
9930014A18Rik|-|-|15|15 D1|ncRNA	699.41	596.6	706.42	543.81	-0.31092	0.0110157	0.133718	9930014A18Rik
Aldh2|AHD-M1|ALDH-E2|ALDHI|Ahd-5|Ahd5|-|5|5 F-G1|protein-coding	5149.58	4718.37	6130.72	4956.02	-0.23241	0.0110393	0.133937	Aldh2
Sgcb|43kDa|AI747103|AI844814|beta-SG|-|5|5 C3.3|protein-coding	391.99	296.87	384.39	314.73	-0.354537	0.0110649	0.13418	Sgcb
Hmgn3|1110002A15Rik|6330514M13Rik|BB071015|TRIP7|-|9|9 E3.1|protein-coding	58.28	70.64	42.81	91.63	0.679943	0.0110887	0.134401	Hmgn3
Atad2|2610509G12Rik|-|15|15 D2|protein-coding	6724.39	5554.56	6733.84	6228.88	-0.20347	0.011124	0.13476	Atad2
A830080D01Rik|2310067E24Rik|Gm1146|-|X|X F4|protein-coding	668.55	443.87	592.88	549.78	-0.355939	0.0111403	0.13489	A830080D01Rik
Ephb3|AW456895|Cek10|Etk2|HEK2|MDK5|Sek4|Tyro6|-|16|16 B1-B4|protein-coding	3.43	5.73	6.52	38.84	2.08633	0.0111812	0.135317	Ephb3
Cdk2ap2|5830466O21Rik|D19Ertd144e|Doc-1r|-|19|19 A|protein-coding	1836.52	2415.98	2040.16	2200.13	0.242185	0.0111903	0.135359	Cdk2ap2
1110037F02Rik|4930422M05Rik|Kiaa1429|mKIAA1429|-|4|4 A2|protein-coding	3689.04	3066.99	3594.48	3308.66	-0.203216	0.0112168	0.135611	1110037F02Rik
Ccdc71l|2010109K11Rik|AV375874|-|12|12 A3|protein-coding	822.84	1024.24	960.51	1175.26	0.289062	0.0112599	0.136064	Ccdc71l
Vegfa|Vegf|Vpf|-|17 C|17 22.79 cM|protein-coding	1539.39	1866.16	1703.24	1960.1	0.227045	0.0112754	0.136183	Vegfa
Sft2d2|2010005O13Rik|AI506168|AW561909|cI-45|-|1|1 H2.3|protein-coding	2269.65	2039.89	2421.76	2032.8	-0.214628	0.0113166	0.136207	Sft2d2
Zak|AV006891|B230120H23Rik|MLTK|MLTKalpha|MLTKbeta|-|2|2 C3|protein-coding	789.69	1027.1	945.62	1111.52	0.28837	0.0112839	0.136207	Zak
Itga3|AA407068|CD49C|GAPB3|-|11 D|11 59.01 cM|protein-coding	8	28.64	15.82	22.91	1.06254	0.0112953	0.136207	Itga3
Hist1h3b|H3-53|-|13|13 A2-A3|protein-coding	193.14	152.73	186.15	107.57	-0.547653	0.0112918	0.136207	Hist1h3b
Mcpt8|BB139338|MMCP-8|-|14 C3|14 28.19 cM|protein-coding	380.56	432.41	268.05	466.12	0.462837	0.0113031	0.136207	Mcpt8
Tceb3|110kDa|AA408125|Tceb3a|-|4|4 D3|protein-coding	2497.08	2124.84	2555.79	2282.8	-0.20838	0.011317	0.136207	Tceb3
[truncated: 22,050 more rows]

## Sheet: Legend
	Table S5: Genes differentially expressed in primary DN2 cells in response to acute PU.1 knockout: full list with RNA-seq data
	Full RNA expression data are shown for two independent experiments in which Spi1 was disrupted by CAS9-mediated deletion. RPKM, fold changes, p values, and p.adj values are shown for the full transcriptome.
