# Supplementary material for: Pioneering, chromatin remodeling, and epigenetic constraint in early T-cell gene regulation by SPI1 (PU.1)
Source: HighWire-hosted journal article supplement (doi:10.1101/gr.231423.117), 2018-08-31
Supplement: Supplemental_Table_S6.xlsx [file Supplemental_Table_S6.xlsx]

## Sheet: A.Consensus padj<0.05
Table S6: PU.1 REGULATED GENES IN PRIMARY PRO-T CELLS: SIGNIFICANT RECIPROCAL RESPONSES TO GAIN AND LOSS OF PU.1 FUNCTION IN DN3 AND DN2 CELLS RESPECTIVELY
	Activated by exogenous PU.1, repressed by PU.1 deletion									Repressed by exogenous PU.1, activated by PU.1 deletion
	Activated w sites	214	Siglecf		Activated without sites	18	Irf5			Repressed w sites	78	Neil1		Repressed without sites	11	Nipal1
			Tbc1d24				Tmprss3					Utrn				Il2rg
			Tlr9				Sh2b2					Cx3cr1				Cdc25b
			Def8				Crtac1					Slc9a2				Tas1r1
			Sorl1				Hbb-b1					Lztfl1				Dgka
			Gng10				Serpina3g					Tmc8				Cecr5
			P2ry13				Col9a3					Fas				Apol7b
			Tor3a				Anks3					Card6				Apol7e
			Ptpn6				Gm16712					Tecpr1				Pear1
			Siglece				Aldh1b1					Ppm1h				Gimap8
			Lrba				Spi1					Rdh10				Repin1
			Cd33				Oas1a					Sh2d5
			Fh1				Acat2					Tox2
			Fam101b				Dnase2a					Calcoco1
			Rufy1				Adam15					Ilvbl
			Khdc1a				Pik3r6					Il12rb1
			Kcnk12				Lmo1					Irak3
			Vps18				9930111J21Rik2					Sox13
			Matk									Adora2a
			Idh2									Gimap5
			5430427O19Rik									Sstr2
			Npl									Sytl2
			Bloc1s2									Gbp6
			Pla2g4a									Clec2i
			Kcnk6									Socs3
			Il1r2									Pbxip1
			Adrbk2									Prkd2
			Il5ra									Hsd11b1
			Crhbp									Gimap1
			Vamp8									Ablim1
			Myo1f									Fam160a2
			Hbb-bs									Arsi
			Mfsd12									Pitpnc1
			Jak2									Gimap6
			Itgax									Pitpnm2
			BC035044									Zdhhc14
			Gm2a									Spata6
			Samhd1									Adamts9
			Syk									Rab27a
			Themis2									Hdac9
			Gm16897									Hid1
			Rcn3									Ssbp2
			Pak1									Gbp4
			Hpse									Slc12a7
			9930111J21Rik1									Bcl2
			Fgd2									Tspan32
			Hfe									Trp53inp1
			Gns									Gimap9
			Apbb1ip									Wnt5b
			Tgm1									Selplg
			Emilin2									Cd28
			Tm7sf3									Sh3bp5
			Actn1									Ccnd3
			Antxr2									Prf1
			Arhgap6									Cxcr5
			Nccrp1									Tnfsf11
			Acer3									Gbp10
			Klhl18									Mbp
			Acy1									Csrnp1
			Atp13a2									Itk
			Lrrc25									Cxxc5
			Sh3pxd2a									Man1a
			Neurl3									Trat1
			Dstyk									Epcam
			Lrrc75a									Ifngr1
			Rogdi									Gbp8
			Zfp385a									Hdac4
			Plek									Pik3ip1
			Nedd9									2900079G21Rik
			Fig4									Tspan13
			Cd34									Lmo7
			Avpi1									Spo11
			Tbxas1									Traf3ip2
			Tmem51									Tlr12
			Cd180									E2f2
			Itgam									Fbxo32
			Adap1									Slc11a2
			Fam49a									Jak3
			Hck
			Krt80
			March1
			Pqlc1
			Clec10a
			Sema3c
			Adam11
			Mef2c
			Susd3
			Ppif
			Arhgef40
			Cd300a
			Creg1
			Adssl1
			Hbb-bt
			Nfam1
			Gusb
			Pld4
			Bcat2
			Lyn
			Nlrp1b
			Abcb1b
			Cdh1
			Trmt2a
			Btk
			Il13ra1
			Cd300lf
			Wdfy4
			Oas2
			Il12rb2
			Khdc1c
			Pmvk
			Zc3h12d
			Padi2
			Nlrc4
			Ccbl2
			Bex6
			Tyrobp
			Atp6v0a1
			Sla
			Ndufb8
			Plac8
			Afg3l1
			Prtn3
			Erp29
			Tspan5
			Aqp9
			Cyp51
			Lhfpl2
			Gk
			Frmd4a
			Flnb
			Ncf2
			Ffar2
			Skap2
			Actr2
			Fam217b
			Csgalnact2
			Fgr
			Erlin1
			Gapt
			Ccl9
			Alcam
			Met
			P2ry14
			Trpm2
			Entpd1
			Prkcd
			Dnajc2
			Plxnd1
			Ywhag
			Rgs18
			Rnf149
			Ap1s3
			Unc93b1
			Lair1
			Ufsp2
			Csf2rb2
			Cycs
			Fut8
			Trim55
			Ltbr
			Pdxk
			Zfp52
			Snx10
			Ptpre
			Alox5ap
			Itgad
			Il31ra
			Ltb4r1
			Nuak2
			Slc16a7
			Ccdc180
			Pik3ap1
			Siglecg
			Gls2
			Tmc5
			Lst1
			Irf6
			Fcgr2b
			Ndst1
			Tnni2
			Dock5
			Coro2a
			3110043O21Rik
			Bcl2l14
			Ralb
			Slc35d3
			Hbb-b2
			Naaa
			Ebi3
			Gpx1
			Vash1
			Ncf1
			Cd44
			Svip
			Gfod1
			Gpr160
			Rpp40
			Tmem108
			Gucy1a3
			D630045J12Rik
			Kmo
			Stx7
			Nxn
			Nlrp10
			Phactr2
			Relt
			Cyp4f18
			Lpcat2
			Adgre1
			Bri3bp
			Chit1
			Nod2
			Cotl1
			Ogfrl1

## Sheet: B.Comparison in CD25 and CD44
Table S6 (contd): PU.1 REGULATED GENES IN PRIMARY PRO-T CELLS: SIGNIFICANT RECIPROCAL RESPONSES TO GAIN AND LOSS OF PU.1 FUNCTION IN DN3 AND DN2 CELLS RESPECTIVELY
Gain of function effects significant without implicit alteration of Notch signaling (padj<0.1)			Gain of function effects significant WITH implicit alteration of Notch signaling (padj<0.1)
PU.1 Activated Genes	PU.1 Repressed Genes		PU.1 Activated Genes	PU.1 Repressed Genes
Genes upregulated by PU1WTHA25 and downregulated by DN2 sgPU.1 KO	Genes downregulated by PU1WTHA25 and upregulated by DN2 sgPU.1 KO		Genes upregulated by PU1WTHA44 and downregulated by DN2 sgPU.1 KO	Genes downregulated by PU1WTHA44 and upregulated by DN2 sgPU.1 KO
Trim55	Gimap9		Trim55	Mbd2
Ncf1	Rab27a		B230312C02Rik	Tcf12
Clec10a	Pitpnm2		Ncf1	Rasgrp2
Siglecg	Jak3		Clec10a	Ldb1
Tbxas1	Ccnd3		Siglecg	Cmtm7
Hck	Slc12a7		Xkr7	Wdr77
Cd180	Csrnp1		Tbxas1	Gimap9
Tnni2	Pitpnc1		Hck	Rgcc
Fcgr2b	Pbxip1		Cd180	Traf4
Cd300a	Utrn		Tnni2	Patz1
Itgax	Sh3bp5		Fcgr2b	Smad3
Prtn3	Ptprf		Cd300a	Rab27a
P2ry13	Cecr5		Itgax	Pitpnm2
Met	Bcl2		Prtn3	Ccnd3
Gapt	Mbp		P2ry13	Smo
Kcnk12	Repin1		Met	Fbxo31
Il13ra1	Gimap1		Gapt	Nr3c1
Nfam1	Hdac4		Kcnk12	Camk2d
Krt80	Pik3ip1		Il13ra1	Ddx6
Itgam	Ssbp2		Trem1	Slc12a7
Il1r2	Cxxc5		Nfam1	Csrnp1
Cd33	Jund		Krt80	Pitpnc1
Inpp5j	Il2rg		Itgam	Cxcr4
Crhbp	Slc11a2		Il1r2	Prkd3
Plek	Calcoco1		Cd33	Fbxo7
Hbb-b2	Dgka		Inpp5j	Ptprs
Hbb-bt	Clec2i		Fcgr3	Utrn
Hbb-bs	Il12rb1		Flt4	Sh3bp5
Hbb-b1	Sox13		Plek	5830418P13Rik
Siglece	Tas1r1		Hbb-b2	Eaf1
Tmc5	Ablim1		Hbb-bt	Ptprf
Siglecf	Ilvbl		Hbb-bs	Zfp219
Adgre1	Hsd11b1		Hbb-b1	Coro7
Irf5	Ifngr1		Siglece	Sema4a
Pik3ap1	Irak3		Tmc5	Mesdc1
Fgd2	Sh2d5		Siglecf	Cecr5
Nlrp10	Neil1		Adgre1	Prkca
Ccl9	Tnfrsf18		Irf5	2700081O15Rik
Tlr9	Spata6		Pik3ap1	Hdac7
Hsd17b6	Tlr12		Fgd2	Bcl2
Nccrp1	Gbp4		Nlrp10	Mbp
Btk	Adora2a		Card9	Sell
Il31ra	Cdc25b		Ccl9	Nck2
Ffar2	E2f2		Tlr9	Satb1
Adam11	Fam160a2		Hsd17b6	Ssbp4
Ccnd1	Cd247		Zfp831	Med12l
Cacnb2	Tspan13		Upp1	Repin1
Cyp4f18	Selplg		Nccrp1	Rftn1
Ebi3	Gbp8		Btk	Uck1
Irf6	Sstr2		Mir7676-2	Tmem55a
Cd300lf	Prkd2		Mir7676-1	Pomt1
March1	Tnfsf11		Procr	Gimap1
Lhfpl2	Tspan32		Ffar2	Abhd8
Pik3r6	Tmc8		Adam11	Dntt
Oas2	Epcam		Ccnd1	Mex3a
Ncf2	Mgst2		Cacnb2	Sigirr
Fam217b	Man1a		Cyp4f18	Klf3
Slc8a1	Rdh10		Ebi3	Impdh1
Mef2c	Gbp11		Rnf180	Maml3
Lst1	Gpr18		Irf6	Zfp395
Spi1	Gbp10		Cd300lf	Ptprcap
Zc3h12d	Lmo7		March1	Crip1
Lmo1	Socs3		Pik3r6	Gnai3
Gm16897	Gbp6		Oas2	Hdac4
Nlrc4	Apol7b		Ncf2	1190002N15Rik
Npl	Spry1		Fam217b	Plin3
Themis2	Apol7e		Rab11fip5	Pik3ip1
Fndc1	Zdhhc14		Fasl	Ssbp2
Chit1	Ppm1h		Als2cl	Cxxc5
Haao	Slc27a1		Slc8a1	Tmem186
Csf2rb2	2900079G21Rik		March3	Kbtbd11
Phactr2	Gimap5		Mef2c	Pex6
Nod2	Trp53inp1		Lst1	Lig4
Il12rb2	Gimap6		Csf3r	Adgrg3
Cd34	Sema4c		Spi1	Fam20a
Rgs18	Sytl2		Zc3h12d	Gstp1
Sema3c	Spo11		Lmo1	Slc11a2
Alox5ap	Cx3cr1		Gm16897	Gstp2
Tmem51	Clic5		Nlrc4	Gpsm2
Aqp9	Traf3ip2		Npl	Mex3b
Pla2g4a	Tecpr1		Themis2	Dgka
Tmprss3	Cxcr5		Haao	Taf4b
Arhgap6	Hid1		Csf2rb2	Clec2i
Entpd1	Itk		Lrrk2	Ets1
Adrbk2	Spib		Phactr2	Rcsd1
Rogdi	Slc9a2		Nod2	Il12rb1
Wdfy4	Trat1		Il12rb2	Sox13
Antxr2	Eng		Cd34	Jakmip1
Kcnk6	Lztfl1		Rgs18	2610020H08Rik
Sorl1	Fbxo32		Onecut2	Tmem121
Oas1a	Card6		Sema3c	Tas1r1
B3gnt7	Arsi		Alox5ap	Hes1
Gpx1	Cd28		Tmem51	Ablim1
Il5ra	Gimap8		Aqp9	Pdcd1
Gls2	Jph2		Pla2g4a	Ilvbl
Gm16712	Gimap4		Tmprss3	Emid1
Svip	Hdac9		Arhgap6	Hsd11b1
Adam15	Fam129a		Entpd1	P2rx7
Matk	Wnt5b		Csf2rb	Egln3
Col9a3	Adamts9		Adrbk2	Kcna3
3110043O21Rik	Nipal1		Rogdi	Sbk1
P2ry14	Fas		Wdfy4	Mmp15
Khdc1a	Mir1903		Antxr2	Macrod1
Gm15663	Prf1		Kcnk6	Dhx34
Zfp385a	Pear1		Sorl1	Glcci1
Piwil2	Tox2		Cdk18	Irak3
Alcam			Oas1a	Sh2d5
Rab31			B3gnt7	Plekhg2
Flnb			Gpx1	Neil1
Kmo			Il5ra	Endou
Bcl2l14			Gm16712	Sidt1
Bex6			Svip	Spata6
Tyrobp			Il17d	Tlr12
Nlrp1b			Mob3b	Gbp4
Khdc1c			Bcl11a	Adora2a
Trpm2			Adam15	Cdc25b
5430427O19Rik			Matk	Rapgef3
Ccdc180			Serpinf1	Ppt2
Neurl3			Col9a3	Il17rb
Rcn3			3110043O21Rik	E2f2
Arhgef40			P2ry14	Fam160a2
Klhl18			Khdc1a	Adam19
Hpse			Ccdc8	Cyth1
Itgad			Zfp229	Gstt2
Tgm1			Zfp385a	Podnl1
Lair1			Piwil2	Cd247
Naaa			Alcam	Rcbtb2
Crtac1			Rab31	Tspan13
Lpcat2			Flnb	Cers4
Slc16a7			Kmo	Tyro3
Ltbr			Lsp1	Gfra1
Megf8			Bex6	C030034L19Rik
Sh2b2			Gatm	5830411N06Rik
5730559C18Rik			Tyrobp	Zfp579
Gucy1a3			Nlrp1b	Selplg
Actn1			Khdc1c	Sstr2
Ephb2			Ckap4	Dtx1
Pmvk			Trpm2	Tnfsf11
Fam49a			5430427O19Rik	Il27ra
Sytl4			Ccdc180	Tspan32
Atp6v0a1			Neurl3	Tmc8
Cd44			Rcn3	Epcam
Gfod1			Arhgef40	Adamts6
Tmem108			Klhl18	Rdh10
Ralb			Hpse	Zbtb16
Fgr			Itgad	2300009A05Rik
Ltb4r1			Tgm1	Gbp11
9930111J21Rik2			Lair1	Adgrl1
Adssl1			Tmem119	Dusp10
Sla			Naaa	Gbp10
D630045J12Rik			Slc27a2	Lpxn
Def8			Arfgef3	Fbxo30
Serpina3g			Crtac1	Lmo7
Abcb1b			Lpcat2	Spef1
Lrrc25			Slc16a7	Gbp6
Gk			Wdfy3	Pde5a
Gpr160			Ltbr	Gadd45a
Ogfrl1			Ceacam16	Ephb6
Acy1			Mlkl	Pdp1
Fam101b			Megf8	Spry1
Rpp40			Arnt2	Ppm1h
Relt			Itga2b	Slc27a1
Aldh1b1			Ptger3	Pld3
Lrrc75a			Sh2b2	Plcl1
Syk			Gucy1a3	2900079G21Rik
Ctbp2			Actn1	Pmepa1
9930111J21Rik1			Cntn1	Themis
Hfe			Gjb3	Trp53inp1
Adap1			Pmvk	Ctxn1
Avpi1			Plau	Socs1
Tspan5			B3galt5	Gprin3
Creg1			B430306N03Rik	Prr36
Pak1			Fam49a	Mst1r
Zfp52			Atp6v0a1	Fam198a
Vamp8			Cd44	Mcoln3
Dstyk			Gfod1	Gimap6
Vash1			Ralb	Gzma
Csgalnact2			H2-Ob	Parm1
Tdrd7			Fgr	Txk
Ptpn6			Serpina3f	Mcam
Dnase2a			Ltb4r1	Spo11
Skap2			Bhlhe40	Cx3cr1
Tbc1d24			P2rx1	Clic5
Ufsp2			9930111J21Rik2	Traf3ip2
Mfsd12			Zeb2	Tecpr1
Pld4			Nhsl2	Cxcr5
Susd3			Sla	Crim1
Ccbl2			Gstt3	Fam167a
Pqlc1			Myo5a	Hid1
Nuak2			Serpina3g	Itk
Slc35d3			Abcb1b	Pou2af1
Cdh1			Lrrc25	Gbx2
Plxnd1			Serpina3i	1700048O20Rik
Pdxk			Ogfrl1	Rab27b
Nedd9			Acy1	Spib
Lrba			Fam129b	Gimap7
Prkcd			Tgfb2	Skap1
Rufy1			Fam101b	Lef1
Tor3a			Relt	Npnt
Samhd1			Serpina3n	Nt5e
Anks3			Lrrc75a	Glp1r
Plac8			BC028528	Dclk2
Cyp51			Syk	Sox12
Ap1s3			Serpina3h	Trat1
Lyn			Ctbp2	Eng
Bloc1s2			Vamp5	Lztfl1
Emilin2			9930111J21Rik1	Colq
Acer3			Idh1	Ly6d
Ywhag			Kalrn	Fsd1l
Vps18			Hfe	Adam2
Fig4			Adap1	Mir8104
Idh2			Fam102b	Arsi
Dock5			Ldlrad3	Cd28
Ptpre			Avpi1	Sox5
Padi2			Slc23a2	Igf2r
Sh3pxd2a			Creg1	Gimap8
Frmd4a			Capg	Krba1
Acat2			Pak1	Jph2
Tm7sf3			Dennd4a	Kifc3
Dnajc2			Zfp52	Gimap4
Myo1f			Vamp8	Cd163l1
Fut8			Dstyk	Slc15a1
Apbb1ip			Prcp	Cxadr
BC035044			Napepld	Fam174b
Stx7			Dennd5a	Wnt5b
Bcat2			Tdrkh	Adamts9
Gng2			Csgalnact2	Nipal1
Coro2a			Tdrd7	Ahsg
Atp13a2			Ptpn6	Adamtsl3
Gusb			Nlrp1a	Heyl
Bri3bp			Dnase2a	Mir1903
Mb21d1			Pcyt1a	Greb1
Bid			Skap2	Fam71b
Erlin1			Tbc1d24	Tktl1
Afg3l1			Eif2ak4	Ptpn13
Fh1			Ufsp2	Prf1
Gm2a			Mfsd12	Tox2
Unc93b1			Pld4
Gng10			Mt1
Cotl1			Susd3
Snx10			Adgrd1
Ppif			Pqlc1
Nxn			Nuak2
Rnf149			Slc35d3
Gns			Fam84b
Ndufb8			Cdh1
Actr2			Sort1
Erp29			Plxnd1
Ndst1			Pdxk
Trmt2a			Nedd9
Jak2			Lrba
Prex1			Prkcd
Cycs			Rufy1
			Slc41a3
			Slc29a3
			Endod1
			Heatr5a
			Tnfrsf1a
			Vcl
			Tor3a
			Samhd1
			Anks3
			Itpr1
			Arrb1
			Plac8
			Ap1s3
			Tmbim1
			Lyn
			Bloc1s2
			Acer3
			Stat3
			Ywhag
			Vps18
			Fig4
			Slco3a1
			Idh2
			Plcb2
			Dock5
			Myo1h
			Ptpre
			Itpk1
			Padi2
			Sh3pxd2a
			Myo1f
			Ptprj
			Pdk3
			Apbb1ip
			Cab39l
			BC035044
			Stx7
			Bcat2
			Gng2
			Rai14
			Coro2a
			St8sia4
			Atp13a2
			Gusb
			Bri3bp
			Mb21d1
			Golm1
			Erlin1
			Kctd10
			Trip11
			D17H6S56E-5
			Fh1
			Gm2a
			Unc93b1
			Gng10
			Spag9
			Cotl1
			Sepp1
			Snx10
			Rnf149
			Gns
			Dock10
			Ndufb8
			Diaph1
			Actr2
			Erp29
			Ndst1
			Morc3
			Trmt2a
			Jak2
			Prex1
			Lrrfip1
			Plcg2

## Sheet: Legend
	Table S6: High confidence PU.1-regulated genes in pro-T cells.
	Genes with concordant responses to loss and gain of PU.1 in primary pro-T cells.
	(A) List defined using padj<0.05 on both, and indicating linked PU.1 binding Status;
	and (B) expanded list showing overlap of genes sensitive to PU.1 deletion with genes differentially expressed in PU1WTHA44
